# Supplementary material for: Inhibitory CCK+ basket synapse defects in mouse models of dystroglycanopathy
Source: eLife. 2024 Jan 5;12:RP87965. doi: 10.7554/eLife.87965 (PMC10942650; doi:10.7554/eLife.87965)
Supplement: Figure 1—source data 1. [file elife-87965-fig1-data1.csv]

Signal	Signal_Norm	Antibody	Experiment	Genotype
297	1	IIH6	2022-10-04_1	WT
29.6	1	b-Dag1	2022-10-04_1	WT
2100	1	b-tubulin	2022-10-04_1	WT
49.8	0.1637773079633545	IIH6	2022-10-04_1	Emx-Cre+;DGF/-
12.5	0.41247642991829037	b-Dag1	2022-10-04_1	Emx-Cre+;DGF/-
2150	1	b-tubulin	2022-10-04_1	Emx-Cre+;DGF/-
91.8	0.31357048748353095	IIH6	2022-10-04_1	Emx-Cre+;POMT2F/F
27.5	0.9425186055620838	b-Dag1	2022-10-04_1	Emx-Cre+;POMT2F/F
2070	1	b-tubulin	2022-10-04_1	Emx-Cre+;POMT2F/F
68.6	0.2580055877928218	IIH6	2022-10-04_1	DGdelta/-
0.421	0.015887363427257044	b-Dag1	2022-10-04_1	DGdelta/-
1880	1	b-tubulin	2022-10-04_1	DGdelta/-
74.7	0.3070824524312897	IIH6	2022-10-04_1	B4GAT1M155T/M155T
24.1	0.9940681961030798	b-Dag1	2022-10-04_1	B4GAT1M155T/M155T
1720	1	b-tubulin	2022-10-04_1	B4GAT1M155T/M155T
136	0.4645488703459718	IIH6	2022-10-04_1	FKRPP448L/P448L
25.5	0.8739717978848413	b-Dag1	2022-10-04_1	FKRPP448L/P448L
2070	1	b-tubulin	2022-10-04_1	FKRPP448L/P448L
117	1	IIH6	2022-11-01_1	WT
48.4	1	b-Dag1	2022-11-01_1	WT
101	1	b-tubulin	2022-11-01_1	WT
42.2	0.3167744332961725	IIH6	2022-11-01_1	Emx-Cre+;DGF/-
14.2	0.25767157743442326	b-Dag1	2022-11-01_1	Emx-Cre+;DGF/-
115	1	b-tubulin	2022-11-01_1	Emx-Cre+;DGF/-
54.1	0.4750936866908383	IIH6	2022-11-01_1	Emx-Cre+;POMT2F/F
56.9	1.2079105117577327	b-Dag1	2022-11-01_1	Emx-Cre+;POMT2F/F
98.3	1	b-tubulin	2022-11-01_1	Emx-Cre+;POMT2F/F
61.4	0.2523972323972324	IIH6	2022-11-01_1	DGdelta/-
0.491	0.004879083038173947	b-Dag1	2022-11-01_1	DGdelta/-
210	1	b-tubulin	2022-11-01_1	DGdelta/-
45.9	0.42107414370963786	IIH6	2022-11-01_1	B4GAT1M155T/M155T
48.8	1.0821967135366808	b-Dag1	2022-11-01_1	B4GAT1M155T/M155T
94.1	1	b-tubulin	2022-11-01_1	B4GAT1M155T/M155T
117	0.6516129032258065	IIH6	2022-11-01_1	FKRPP448L/P448L
60.5	0.814516129032258	b-Dag1	2022-11-01_1	FKRPP448L/P448L
155	1	b-tubulin	2022-11-01_1	FKRPP448L/P448L
219	1	IIH6	2022-11-08_1	WT
51.4	1	b-Dag1	2022-11-08_1	WT
319	1	b-tubulin	2022-11-08_1	WT
10	0.08092338914256723	IIH6	2022-11-08_1	Emx-Cre+;DGF/-
17	0.5861435365326416	b-Dag1	2022-11-08_1	Emx-Cre+;DGF/-
180	1	b-tubulin	2022-11-08_1	Emx-Cre+;DGF/-
81.2	0.46565994319203247	IIH6	2022-11-08_1	Emx-Cre+;POMT2F/F
64.9	1.5857639633567207	b-Dag1	2022-11-08_1	Emx-Cre+;POMT2F/F
254	1	b-tubulin	2022-11-08_1	Emx-Cre+;POMT2F/F
45.2	0.21170183088872252	IIH6	2022-11-08_1	DGdelta/-
0.49	0.009778297696648192	b-Dag1	2022-11-08_1	DGdelta/-
311	1	b-tubulin	2022-11-08_1	DGdelta/-
41.2	0.23260769530282116	IIH6	2022-11-08_1	B4GAT1M155T/M155T
55.8	1.3422767170391818	b-Dag1	2022-11-08_1	B4GAT1M155T/M155T
258	1	b-tubulin	2022-11-08_1	B4GAT1M155T/M155T
115	0.7158607501073254	IIH6	2022-11-08_1	FKRPP448L/P448L
47.1	1.2492018357777113	b-Dag1	2022-11-08_1	FKRPP448L/P448L
234	1	b-tubulin	2022-11-08_1	FKRPP448L/P448L
