# Supplementary material for: Inhibitory CCK+ basket synapse defects in mouse models of dystroglycanopathy
Source: eLife. 2024 Jan 5;12:RP87965. doi: 10.7554/eLife.87965 (PMC10942650; doi:10.7554/eLife.87965)
Supplement: Figure 2—source data 1. [file elife-87965-fig2-data1.csv]

percent	Image	Intensity	Genotype	Condition	Experiment	Marker
1	JJ001	-30.694703968253975	Emx-Cre+;POMT2F/+	Emx-POMT2-Ctrl	Emx-POMT2	CUX1
1	JJ002	-52.62484027275732	Emx-Cre+;POMT2F/+	Emx-POMT2-Ctrl	Emx-POMT2	CUX1
1	JJ003	-11.307824397910736	Emx-Cre+;POMT2F/+	Emx-POMT2-Ctrl	Emx-POMT2	CUX1
1	JJ004	-41.67066255992836	Emx-Cre+;POMT2F/F	Emx-POMT2-cKO	Emx-POMT2	CUX1
1	JJ005	-35.867766130268215	Emx-Cre+;POMT2F/F	Emx-POMT2-cKO	Emx-POMT2	CUX1
1	JJ006	-57.170379534844244	Emx-Cre+;POMT2F/F	Emx-POMT2-cKO	Emx-POMT2	CUX1
1	JJ007	-50.36027154026459	Emx-Cre+;POMT2F/+	Emx-POMT2-Ctrl	Emx-POMT2	CUX1
1	JJ008	-45.632942346287166	Emx-Cre+;POMT2F/F	Emx-POMT2-cKO	Emx-POMT2	CUX1
1	JJ053	-49.033765205701265	WT	B4GAT1-Ctrl	B4GAT1	CUX1
1	JJ054	-60.66308101882174	WT	B4GAT1-Ctrl	B4GAT1	CUX1
1	JJ055	4.0343350568532514	WT	B4GAT1-Ctrl	B4GAT1	CUX1
1	JJ056	-12.585071570071932	WT	B4GAT1-Ctrl	B4GAT1	CUX1
1	JJ057	6.880015558472375	B4GAT1M155T/M155T;Thy1	B4GAT1-Mutant	B4GAT1	CUX1
1	JJ058	1.220633004087669	B4GAT1M155T/M155T;Thy1	B4GAT1-Mutant	B4GAT1	CUX1
1	JJ059	18.593525756396048	B4GAT1M155T/M155T;Thy1	B4GAT1-Mutant	B4GAT1	CUX1
1	JJ060	3.9010769121555122	B4GAT1M155T/M155T;Thy1	B4GAT1-Mutant	B4GAT1	CUX1
1	JJ069	-15.5703372727581	B4GAT1M155T/M155T;Thy1	B4GAT1-Mutant	B4GAT1	CUX1
1	JJ070	-26.66054413660682	B4GAT1M155T/M155T;Thy1	B4GAT1-Mutant	B4GAT1	CUX1
1	JJ071	-42.43316922862766	B4GAT1M155T/M155T	B4GAT1-Mutant	B4GAT1	CUX1
1	JJ072	-73.59578299393964	B4GAT1M155T/M155T	B4GAT1-Mutant	B4GAT1	CUX1
1	JJ073	-9.177716757153538	B4GAT1M155T/M155T	B4GAT1-Mutant	B4GAT1	CUX1
1	JJ074	-36.71035933034864	B4GAT1M155T/M155T	B4GAT1-Mutant	B4GAT1	CUX1
1	JJ075	-8.678394549025862	B4GAT1M155T/M155T;Thy1	B4GAT1-Mutant	B4GAT1	CUX1
1	JJ076	-38.075559007205094	B4GAT1M155T/M155T;Thy1	B4GAT1-Mutant	B4GAT1	CUX1
1	JJ086	-72.53055660359564	B4GAT1M155T/M155T	B4GAT1-Mutant	B4GAT1	CUX1
1	JJ087	-107.36549045463464	B4GAT1M155T/M155T	B4GAT1-Mutant	B4GAT1	CUX1
1	JJ088	-38.64653100641025	B4GAT1M155T/M155T	B4GAT1-Mutant	B4GAT1	CUX1
1	JJ089	-59.88423734530397	B4GAT1M155T/M155T	B4GAT1-Mutant	B4GAT1	CUX1
1	JJ090	-71.84029282621081	B4GAT1M155T/M155T;Thy1	B4GAT1-Mutant	B4GAT1	CUX1
1	JJ091	-126.05148960157801	B4GAT1M155T/M155T;Thy1	B4GAT1-Mutant	B4GAT1	CUX1
1	JJ092	-110.04784404615712	B4GAT1M155T/M155T;Thy1	B4GAT1-Mutant	B4GAT1	CUX1
1	JJ093	-32.236296306818154	B4GAT1M155T/M155T;Thy1	B4GAT1-Mutant	B4GAT1	CUX1
1	JJ106	-73.81708653211679	WT	B4GAT1-Ctrl	B4GAT1	CUX1
1	JJ107	-50.830295521412644	WT	B4GAT1-Ctrl	B4GAT1	CUX1
1	JJ108	-5.230681261013122	WT	B4GAT1-Ctrl	B4GAT1	CUX1
1	JJ109	-75.89261654341631	WT	B4GAT1-Ctrl	B4GAT1	CUX1
1	JJ114	11.246646786420532	WT	B4GAT1-Ctrl	B4GAT1	CUX1
1	JJ115	-80.5049834124336	WT	B4GAT1-Ctrl	B4GAT1	CUX1
1	JJ116	-6.966776252361494	WT	B4GAT1-Ctrl	B4GAT1	CUX1
1	JJ117	-105.4796004238433	WT	B4GAT1-Ctrl	B4GAT1	CUX1
1	JJ118	13.480628507414982	Emx-Cre+;DGF/-	Emx-DG-cKO	Emx-DG	CUX1
1	JJ119	-34.42085682516417	Emx-Cre+;DGF/-	Emx-DG-cKO	Emx-DG	CUX1
1	JJ120	12.594877970014542	Emx-Cre+;DGF/-	Emx-DG-cKO	Emx-DG	CUX1
1	JJ121	4.407464899592071	Emx-Cre+;DGF/-	Emx-DG-cKO	Emx-DG	CUX1
1	JJ126	-49.0402262858423	Emx-Cre+;DGF/-	Emx-DG-cKO	Emx-DG	CUX1
1	JJ127	-64.79656884662562	Emx-Cre+;DGF/-	Emx-DG-cKO	Emx-DG	CUX1
1	JJ128	7.027927954341806	Emx-Cre+;DGF/-	Emx-DG-cKO	Emx-DG	CUX1
1	JJ129	7.813622778012037	Emx-Cre+;DGF/-	Emx-DG-cKO	Emx-DG	CUX1
1	JJ138	-8.114170288743253	Emx-Cre+;DGF/+	Emx-DG-Ctrl	Emx-DG	CUX1
1	JJ139	26.328811180517278	Emx-Cre+;DGF/+	Emx-DG-Ctrl	Emx-DG	CUX1
1	JJ140	21.00812837507482	Emx-Cre+;DGF/+	Emx-DG-Ctrl	Emx-DG	CUX1
1	JJ141	35.69028002266803	Emx-Cre+;DGF/+	Emx-DG-Ctrl	Emx-DG	CUX1
1	JJ158	-64.18820687790685	Emx-Cre+;POMT2F/F	Emx-POMT2-cKO	Emx-POMT2	CUX1
1	JJ159	-67.97991404845254	Emx-Cre+;POMT2F/F	Emx-POMT2-cKO	Emx-POMT2	CUX1
1	JJ160	-52.61753301439527	Emx-Cre+;POMT2F/F	Emx-POMT2-cKO	Emx-POMT2	CUX1
1	JJ161	-84.34222639737436	Emx-Cre+;POMT2F/F	Emx-POMT2-cKO	Emx-POMT2	CUX1
1	JJ162	-49.09738478450483	Emx-Cre+;POMT2F/+	Emx-POMT2-Ctrl	Emx-POMT2	CUX1
1	JJ163	-30.998483047418063	Emx-Cre+;POMT2F/+	Emx-POMT2-Ctrl	Emx-POMT2	CUX1
1	JJ164	-49.51611375726117	Emx-Cre+;POMT2F/+	Emx-POMT2-Ctrl	Emx-POMT2	CUX1
1	JJ165	-31.387228694537118	Emx-Cre+;POMT2F/+	Emx-POMT2-Ctrl	Emx-POMT2	CUX1
1	JJ190	-53.6350872182094	Emx-Cre+;POMT2F/F	Emx-POMT2-cKO	Emx-POMT2	CUX1
1	JJ191	-17.093590324718964	Emx-Cre+;POMT2F/F	Emx-POMT2-cKO	Emx-POMT2	CUX1
1	JJ192	-22.317891135414186	Emx-Cre+;POMT2F/F	Emx-POMT2-cKO	Emx-POMT2	CUX1
1	JJ193	21.04955983113871	Emx-Cre+;POMT2F/F	Emx-POMT2-cKO	Emx-POMT2	CUX1
1	JJ198	-32.211415069969085	Emx-Cre+;POMT2F/+	Emx-POMT2-Ctrl	Emx-POMT2	CUX1
1	JJ199	-70.8916527501295	Emx-Cre+;POMT2F/+	Emx-POMT2-Ctrl	Emx-POMT2	CUX1
1	JJ200	-2.485491924643251	Emx-Cre+;POMT2F/+	Emx-POMT2-Ctrl	Emx-POMT2	CUX1
1	JJ201	-4.783892829870315	Emx-Cre+;POMT2F/+	Emx-POMT2-Ctrl	Emx-POMT2	CUX1
1	JJ206	-42.19776371635609	Emx-Cre+;POMT2F/+	Emx-POMT2-Ctrl	Emx-POMT2	CUX1
1	JJ207	167.63502695283583	Emx-Cre+;POMT2F/+	Emx-POMT2-Ctrl	Emx-POMT2	CUX1
1	JJ208	-29.951955322722295	Emx-Cre+;POMT2F/+	Emx-POMT2-Ctrl	Emx-POMT2	CUX1
1	JJ209	-31.182335044208248	Emx-Cre+;POMT2F/+	Emx-POMT2-Ctrl	Emx-POMT2	CUX1
1	JJ226	15.123498057370094	WT	ICD-Ctrl	ICD	CUX1
1	JJ227	-4.3459781480472275	DGdelta/-	ICD-Mutant	ICD	CUX1
1	JJ228	-24.65056832596137	DGdelta/-	ICD-Mutant	ICD	CUX1
1	JJ229	17.749011781467022	DGdelta/-	ICD-Mutant	ICD	CUX1
1	JJ230	-20.775735216448954	DGdelta/-	ICD-Mutant	ICD	CUX1
1	JJ235	-34.68248136431786	WT	ICD-Ctrl	ICD	CUX1
1	JJ236	-14.75311592271502	WT	ICD-Ctrl	ICD	CUX1
1	JJ237	17.73476156944264	WT	ICD-Ctrl	ICD	CUX1
1	JJ258	-81.85186363958191	FKRPMut	FKRP-Mutant	FKRP	CUX1
1	JJ259	-67.79228615082275	FKRPMut	FKRP-Mutant	FKRP	CUX1
1	JJ260	-93.24976478985508	FKRPMut	FKRP-Mutant	FKRP	CUX1
1	JJ261	-64.99274973924022	FKRPMut	FKRP-Mutant	FKRP	CUX1
1	JJ262	-134.1341070780201	WT	FKRP-Ctrl	FKRP	CUX1
1	JJ263	-141.33570946971824	WT	FKRP-Ctrl	FKRP	CUX1
1	JJ264	-98.39807041367756	WT	FKRP-Ctrl	FKRP	CUX1
1	JJ265	-104.27350865359325	WT	FKRP-Ctrl	FKRP	CUX1
1	JJ266	-109.19215032427411	WT	FKRP-Ctrl	FKRP	CUX1
1	JJ267	-81.553842202312	WT	FKRP-Ctrl	FKRP	CUX1
1	JJ268	-92.70031028785398	WT	FKRP-Ctrl	FKRP	CUX1
1	JJ269	-130.7280810168497	WT	FKRP-Ctrl	FKRP	CUX1
1	JJ270	14.675443137701828	FKRPMut	FKRP-Mutant	FKRP	CUX1
1	JJ271	25.520322543689797	FKRPMut	FKRP-Mutant	FKRP	CUX1
1	JJ272	26.821252832219937	FKRPMut	FKRP-Mutant	FKRP	CUX1
1	JJ273	20.07344728322135	FKRPMut	FKRP-Mutant	FKRP	CUX1
1	JJ274	-56.92949683440256	WT	FKRP-Ctrl	FKRP	CUX1
1	JJ275	-32.60746193801972	WT	FKRP-Ctrl	FKRP	CUX1
1	JJ276	42.08714811133158	WT	FKRP-Ctrl	FKRP	CUX1
1	JJ277	-16.399674531341947	WT	FKRP-Ctrl	FKRP	CUX1
1	JJ306	-31.95140269162937	DGdelta/-	ICD-Mutant	ICD	CUX1
1	JJ307	4.994970636749258	DGdelta/-	ICD-Mutant	ICD	CUX1
1	JJ308	-19.902513161258337	DGdelta/-	ICD-Mutant	ICD	CUX1
1	JJ309	3.0833335352315316	DGdelta/-	ICD-Mutant	ICD	CUX1
1	JJ314	19.935048726807697	DGdelta/-	ICD-Mutant	ICD	CUX1
1	JJ315	16.050043537692318	DGdelta/-	ICD-Mutant	ICD	CUX1
1	JJ316	16.0012482294851	DGdelta/-	ICD-Mutant	ICD	CUX1
1	JJ317	13.229391359499346	DGdelta/-	ICD-Mutant	ICD	CUX1
1	JJ322	-55.50509670138297	WT	ICD-Ctrl	ICD	CUX1
1	JJ323	-93.79695705057884	WT	ICD-Ctrl	ICD	CUX1
1	JJ324	-13.971401578235335	WT	ICD-Ctrl	ICD	CUX1
1	JJ325	-3.218147331943934	WT	ICD-Ctrl	ICD	CUX1
1	JJ330	67.90256606595513	WT	ICD-Ctrl	ICD	CUX1
1	JJ331	90.67189051610683	WT	ICD-Ctrl	ICD	CUX1
1	JJ332	42.34912282691255	WT	ICD-Ctrl	ICD	CUX1
1	JJ333	73.31085406934592	WT	ICD-Ctrl	ICD	CUX1
1	JJ346	-8.508985876832526	FKRPMut	FKRP-Mutant	FKRP	CUX1
1	JJ347	62.77185695215477	FKRPMut	FKRP-Mutant	FKRP	CUX1
1	JJ348	13.157636873502762	FKRPMut	FKRP-Mutant	FKRP	CUX1
1	JJ349	7.677484678034527	FKRPMut	FKRP-Mutant	FKRP	CUX1
1	JJ350	14.258935027665265	WT	FKRP-Ctrl	FKRP	CUX1
1	JJ351	48.33394739293889	WT	FKRP-Ctrl	FKRP	CUX1
1	JJ352	75.5703576060168	WT	FKRP-Ctrl	FKRP	CUX1
1	JJ353	25.283887712602034	WT	FKRP-Ctrl	FKRP	CUX1
1	JJ354	-36.87806261613154	Emx-Cre+;DGF/-	Emx-DG-cKO	Emx-DG	CUX1
1	JJ355	-71.9960977448895	Emx-Cre+;DGF/-	Emx-DG-cKO	Emx-DG	CUX1
1	JJ356	-49.456550362395625	Emx-Cre+;DGF/-	Emx-DG-cKO	Emx-DG	CUX1
1	JJ357	-3.210020289873872	Emx-Cre+;DGF/-	Emx-DG-cKO	Emx-DG	CUX1
1	JJ362	-19.89088103372986	Emx-Cre+;DGF/+	Emx-DG-Ctrl	Emx-DG	CUX1
1	JJ363	-30.51097922895106	Emx-Cre+;DGF/+	Emx-DG-Ctrl	Emx-DG	CUX1
1	JJ364	11.239756376285186	Emx-Cre+;DGF/+	Emx-DG-Ctrl	Emx-DG	CUX1
1	JJ365	-26.92499885980942	Emx-Cre+;DGF/+	Emx-DG-Ctrl	Emx-DG	CUX1
1	JJ370	-82.03746737748634	Emx-Cre+;DGF/-	Emx-DG-cKO	Emx-DG	CUX1
1	JJ371	-38.610324389270886	Emx-Cre+;DGF/-	Emx-DG-cKO	Emx-DG	CUX1
1	JJ372	-6.192154606889592	Emx-Cre+;DGF/-	Emx-DG-cKO	Emx-DG	CUX1
1	JJ373	-50.844904489155205	Emx-Cre+;DGF/-	Emx-DG-cKO	Emx-DG	CUX1
1	JJ378	146.31030196479443	Emx-Cre+;DGF/-	Emx-DG-cKO	Emx-DG	CUX1
1	JJ379	78.49894737395032	Emx-Cre+;DGF/-	Emx-DG-cKO	Emx-DG	CUX1
1	JJ380	-45.11803182916045	Emx-Cre+;DGF/-	Emx-DG-cKO	Emx-DG	CUX1
1	JJ381	15.008995649254226	Emx-Cre+;DGF/-	Emx-DG-cKO	Emx-DG	CUX1
1	JJ386	-14.766136800766276	Emx-Cre+;DGF/+	Emx-DG-Ctrl	Emx-DG	CUX1
1	JJ387	-32.999382664412586	Emx-Cre+;DGF/+	Emx-DG-Ctrl	Emx-DG	CUX1
1	JJ388	24.499767132494963	Emx-Cre+;DGF/+	Emx-DG-Ctrl	Emx-DG	CUX1
1	JJ392	-58.68802353235659	Emx-Cre+;DGF/+	Emx-DG-Ctrl	Emx-DG	CUX1
1	JJ393	-36.9711483553879	Emx-Cre+;DGF/+	Emx-DG-Ctrl	Emx-DG	CUX1
1	JJ394	-43.220345676746945	Emx-Cre+;DGF/+	Emx-DG-Ctrl	Emx-DG	CUX1
1	JJ395	-35.205439639465474	Emx-Cre+;DGF/+	Emx-DG-Ctrl	Emx-DG	CUX1
2	JJ001	-26.02778283950617	Emx-Cre+;POMT2F/+	Emx-POMT2-Ctrl	Emx-POMT2	CUX1
2	JJ002	-53.44970220966635	Emx-Cre+;POMT2F/+	Emx-POMT2-Ctrl	Emx-POMT2	CUX1
2	JJ003	-4.216992014245022	Emx-Cre+;POMT2F/+	Emx-POMT2-Ctrl	Emx-POMT2	CUX1
2	JJ004	-50.51087972446131	Emx-Cre+;POMT2F/F	Emx-POMT2-cKO	Emx-POMT2	CUX1
2	JJ005	-26.608518237547894	Emx-Cre+;POMT2F/F	Emx-POMT2-cKO	Emx-POMT2	CUX1
2	JJ006	-25.431949282743386	Emx-Cre+;POMT2F/F	Emx-POMT2-cKO	Emx-POMT2	CUX1
2	JJ007	-46.857221638732426	Emx-Cre+;POMT2F/+	Emx-POMT2-Ctrl	Emx-POMT2	CUX1
2	JJ008	-48.05261290518763	Emx-Cre+;POMT2F/F	Emx-POMT2-cKO	Emx-POMT2	CUX1
2	JJ053	-40.701014963044805	WT	B4GAT1-Ctrl	B4GAT1	CUX1
2	JJ054	-47.22508849451032	WT	B4GAT1-Ctrl	B4GAT1	CUX1
2	JJ055	31.73450058645407	WT	B4GAT1-Ctrl	B4GAT1	CUX1
2	JJ056	-11.214558410392064	WT	B4GAT1-Ctrl	B4GAT1	CUX1
2	JJ057	12.595400430267262	B4GAT1M155T/M155T;Thy1	B4GAT1-Mutant	B4GAT1	CUX1
2	JJ058	4.0923197210529265	B4GAT1M155T/M155T;Thy1	B4GAT1-Mutant	B4GAT1	CUX1
2	JJ059	44.73963579223831	B4GAT1M155T/M155T;Thy1	B4GAT1-Mutant	B4GAT1	CUX1
2	JJ060	10.026923376591261	B4GAT1M155T/M155T;Thy1	B4GAT1-Mutant	B4GAT1	CUX1
2	JJ069	-20.380331981752835	B4GAT1M155T/M155T;Thy1	B4GAT1-Mutant	B4GAT1	CUX1
2	JJ070	-26.02361675697868	B4GAT1M155T/M155T;Thy1	B4GAT1-Mutant	B4GAT1	CUX1
2	JJ071	-38.3938673553802	B4GAT1M155T/M155T	B4GAT1-Mutant	B4GAT1	CUX1
2	JJ072	-87.62512758989924	B4GAT1M155T/M155T	B4GAT1-Mutant	B4GAT1	CUX1
2	JJ073	-30.171506420847283	B4GAT1M155T/M155T	B4GAT1-Mutant	B4GAT1	CUX1
2	JJ074	-39.700399770587445	B4GAT1M155T/M155T	B4GAT1-Mutant	B4GAT1	CUX1
2	JJ075	-32.77492851648352	B4GAT1M155T/M155T;Thy1	B4GAT1-Mutant	B4GAT1	CUX1
2	JJ076	-45.42770394653841	B4GAT1M155T/M155T;Thy1	B4GAT1-Mutant	B4GAT1	CUX1
2	JJ086	-80.243370057766	B4GAT1M155T/M155T	B4GAT1-Mutant	B4GAT1	CUX1
2	JJ087	-93.4310435662931	B4GAT1M155T/M155T	B4GAT1-Mutant	B4GAT1	CUX1
2	JJ088	-68.76646781959705	B4GAT1M155T/M155T	B4GAT1-Mutant	B4GAT1	CUX1
2	JJ089	-93.64512163438656	B4GAT1M155T/M155T	B4GAT1-Mutant	B4GAT1	CUX1
2	JJ090	-41.26535178157644	B4GAT1M155T/M155T;Thy1	B4GAT1-Mutant	B4GAT1	CUX1
2	JJ091	-58.54764888630219	B4GAT1M155T/M155T;Thy1	B4GAT1-Mutant	B4GAT1	CUX1
2	JJ092	-98.2336801066271	B4GAT1M155T/M155T;Thy1	B4GAT1-Mutant	B4GAT1	CUX1
2	JJ093	19.452707165404075	B4GAT1M155T/M155T;Thy1	B4GAT1-Mutant	B4GAT1	CUX1
2	JJ106	-115.78258222390052	WT	B4GAT1-Ctrl	B4GAT1	CUX1
2	JJ107	-83.4783384757756	WT	B4GAT1-Ctrl	B4GAT1	CUX1
2	JJ108	-29.451110586365797	WT	B4GAT1-Ctrl	B4GAT1	CUX1
2	JJ109	-91.91980126801275	WT	B4GAT1-Ctrl	B4GAT1	CUX1
2	JJ114	-57.21454745883875	WT	B4GAT1-Ctrl	B4GAT1	CUX1
2	JJ115	-60.2138568149796	WT	B4GAT1-Ctrl	B4GAT1	CUX1
2	JJ116	-5.148231634885254	WT	B4GAT1-Ctrl	B4GAT1	CUX1
2	JJ117	-84.65465187195441	WT	B4GAT1-Ctrl	B4GAT1	CUX1
2	JJ118	-17.575538016251528	Emx-Cre+;DGF/-	Emx-DG-cKO	Emx-DG	CUX1
2	JJ119	-44.290816756249114	Emx-Cre+;DGF/-	Emx-DG-cKO	Emx-DG	CUX1
2	JJ120	1.5587832188774275	Emx-Cre+;DGF/-	Emx-DG-cKO	Emx-DG	CUX1
2	JJ121	-21.974468375929405	Emx-Cre+;DGF/-	Emx-DG-cKO	Emx-DG	CUX1
2	JJ126	-43.69001304659497	Emx-Cre+;DGF/-	Emx-DG-cKO	Emx-DG	CUX1
2	JJ127	-60.36673637580736	Emx-Cre+;DGF/-	Emx-DG-cKO	Emx-DG	CUX1
2	JJ128	44.36324904834638	Emx-Cre+;DGF/-	Emx-DG-cKO	Emx-DG	CUX1
2	JJ129	29.0859053815783	Emx-Cre+;DGF/-	Emx-DG-cKO	Emx-DG	CUX1
2	JJ138	-7.240546827841096	Emx-Cre+;DGF/+	Emx-DG-Ctrl	Emx-DG	CUX1
2	JJ139	26.22022645331695	Emx-Cre+;DGF/+	Emx-DG-Ctrl	Emx-DG	CUX1
2	JJ140	4.0038108245697686	Emx-Cre+;DGF/+	Emx-DG-Ctrl	Emx-DG	CUX1
2	JJ141	23.381786051964145	Emx-Cre+;DGF/+	Emx-DG-Ctrl	Emx-DG	CUX1
2	JJ158	-50.2303768719651	Emx-Cre+;POMT2F/F	Emx-POMT2-cKO	Emx-POMT2	CUX1
2	JJ159	-57.650617426317204	Emx-Cre+;POMT2F/F	Emx-POMT2-cKO	Emx-POMT2	CUX1
2	JJ160	-38.20719712786323	Emx-Cre+;POMT2F/F	Emx-POMT2-cKO	Emx-POMT2	CUX1
2	JJ161	-73.75318764037267	Emx-Cre+;POMT2F/F	Emx-POMT2-cKO	Emx-POMT2	CUX1
2	JJ162	-34.90267922100395	Emx-Cre+;POMT2F/+	Emx-POMT2-Ctrl	Emx-POMT2	CUX1
2	JJ163	-44.91851812913277	Emx-Cre+;POMT2F/+	Emx-POMT2-Ctrl	Emx-POMT2	CUX1
2	JJ164	-43.44777675318255	Emx-Cre+;POMT2F/+	Emx-POMT2-Ctrl	Emx-POMT2	CUX1
2	JJ165	-39.339535132907805	Emx-Cre+;POMT2F/+	Emx-POMT2-Ctrl	Emx-POMT2	CUX1
2	JJ190	-46.76869237267264	Emx-Cre+;POMT2F/F	Emx-POMT2-cKO	Emx-POMT2	CUX1
2	JJ191	-25.63894212294313	Emx-Cre+;POMT2F/F	Emx-POMT2-cKO	Emx-POMT2	CUX1
2	JJ192	-32.42824103506755	Emx-Cre+;POMT2F/F	Emx-POMT2-cKO	Emx-POMT2	CUX1
2	JJ193	-10.691782091048083	Emx-Cre+;POMT2F/F	Emx-POMT2-cKO	Emx-POMT2	CUX1
2	JJ198	-34.692616144165676	Emx-Cre+;POMT2F/+	Emx-POMT2-Ctrl	Emx-POMT2	CUX1
2	JJ199	-61.34235562891737	Emx-Cre+;POMT2F/+	Emx-POMT2-Ctrl	Emx-POMT2	CUX1
2	JJ200	-8.50877405707873	Emx-Cre+;POMT2F/+	Emx-POMT2-Ctrl	Emx-POMT2	CUX1
2	JJ201	-10.277843787724729	Emx-Cre+;POMT2F/+	Emx-POMT2-Ctrl	Emx-POMT2	CUX1
2	JJ206	-35.951517151326925	Emx-Cre+;POMT2F/+	Emx-POMT2-Ctrl	Emx-POMT2	CUX1
2	JJ207	-41.76195105958654	Emx-Cre+;POMT2F/+	Emx-POMT2-Ctrl	Emx-POMT2	CUX1
2	JJ208	-21.898598776596014	Emx-Cre+;POMT2F/+	Emx-POMT2-Ctrl	Emx-POMT2	CUX1
2	JJ209	-49.84344761372995	Emx-Cre+;POMT2F/+	Emx-POMT2-Ctrl	Emx-POMT2	CUX1
2	JJ226	28.036874015224537	WT	ICD-Ctrl	ICD	CUX1
2	JJ227	-28.328444884376	DGdelta/-	ICD-Mutant	ICD	CUX1
2	JJ228	-23.511589104291716	DGdelta/-	ICD-Mutant	ICD	CUX1
2	JJ229	1.552678524723812	DGdelta/-	ICD-Mutant	ICD	CUX1
2	JJ230	-15.619950829338487	DGdelta/-	ICD-Mutant	ICD	CUX1
2	JJ235	-48.729190606439225	WT	ICD-Ctrl	ICD	CUX1
2	JJ236	-30.97975942885944	WT	ICD-Ctrl	ICD	CUX1
2	JJ237	-14.73435726365335	WT	ICD-Ctrl	ICD	CUX1
2	JJ258	-68.76014424707643	FKRPMut	FKRP-Mutant	FKRP	CUX1
2	JJ259	-57.59912659491417	FKRPMut	FKRP-Mutant	FKRP	CUX1
2	JJ260	-81.48879958856683	FKRPMut	FKRP-Mutant	FKRP	CUX1
2	JJ261	-64.15087071347534	FKRPMut	FKRP-Mutant	FKRP	CUX1
2	JJ262	-123.16473436213448	WT	FKRP-Ctrl	FKRP	CUX1
2	JJ263	-130.02337949472306	WT	FKRP-Ctrl	FKRP	CUX1
2	JJ264	-85.18355464970989	WT	FKRP-Ctrl	FKRP	CUX1
2	JJ265	-98.29159750655994	WT	FKRP-Ctrl	FKRP	CUX1
2	JJ266	-104.32932907609126	WT	FKRP-Ctrl	FKRP	CUX1
2	JJ267	-94.09078263689979	WT	FKRP-Ctrl	FKRP	CUX1
2	JJ268	-69.80953434872885	WT	FKRP-Ctrl	FKRP	CUX1
2	JJ269	-101.754343592387	WT	FKRP-Ctrl	FKRP	CUX1
2	JJ270	-4.739633147515014	FKRPMut	FKRP-Mutant	FKRP	CUX1
2	JJ271	19.061768554640633	FKRPMut	FKRP-Mutant	FKRP	CUX1
2	JJ272	14.690722726197086	FKRPMut	FKRP-Mutant	FKRP	CUX1
2	JJ273	0.6052056699750589	FKRPMut	FKRP-Mutant	FKRP	CUX1
2	JJ274	-30.05416713437262	WT	FKRP-Ctrl	FKRP	CUX1
2	JJ275	-72.44652947275551	WT	FKRP-Ctrl	FKRP	CUX1
2	JJ276	14.450285598104074	WT	FKRP-Ctrl	FKRP	CUX1
2	JJ277	-23.45616975137625	WT	FKRP-Ctrl	FKRP	CUX1
2	JJ306	-25.71547473070139	DGdelta/-	ICD-Mutant	ICD	CUX1
2	JJ307	-54.19166524074493	DGdelta/-	ICD-Mutant	ICD	CUX1
2	JJ308	-42.92829588316607	DGdelta/-	ICD-Mutant	ICD	CUX1
2	JJ309	-18.38665716281169	DGdelta/-	ICD-Mutant	ICD	CUX1
2	JJ314	-4.595104722439639	DGdelta/-	ICD-Mutant	ICD	CUX1
2	JJ315	-23.278214146144325	DGdelta/-	ICD-Mutant	ICD	CUX1
2	JJ316	-0.48389901568350524	DGdelta/-	ICD-Mutant	ICD	CUX1
2	JJ317	-11.689803794246549	DGdelta/-	ICD-Mutant	ICD	CUX1
2	JJ322	-50.09274725693854	WT	ICD-Ctrl	ICD	CUX1
2	JJ323	-85.04766394012074	WT	ICD-Ctrl	ICD	CUX1
2	JJ324	-41.187502631875155	WT	ICD-Ctrl	ICD	CUX1
2	JJ325	24.87315702997766	WT	ICD-Ctrl	ICD	CUX1
2	JJ330	10.51296038451009	WT	ICD-Ctrl	ICD	CUX1
2	JJ331	60.544506654300335	WT	ICD-Ctrl	ICD	CUX1
2	JJ332	2.2499994481074737	WT	ICD-Ctrl	ICD	CUX1
2	JJ333	10.922534894052623	WT	ICD-Ctrl	ICD	CUX1
2	JJ346	-37.242276911786995	FKRPMut	FKRP-Mutant	FKRP	CUX1
2	JJ347	10.960264073053205	FKRPMut	FKRP-Mutant	FKRP	CUX1
2	JJ348	-10.930264278485348	FKRPMut	FKRP-Mutant	FKRP	CUX1
2	JJ349	-15.112589745126874	FKRPMut	FKRP-Mutant	FKRP	CUX1
2	JJ350	23.286481761808318	WT	FKRP-Ctrl	FKRP	CUX1
2	JJ351	3.0150416627041827	WT	FKRP-Ctrl	FKRP	CUX1
2	JJ352	57.80148569806397	WT	FKRP-Ctrl	FKRP	CUX1
2	JJ353	-4.19090519927541	WT	FKRP-Ctrl	FKRP	CUX1
2	JJ354	-60.370863676737635	Emx-Cre+;DGF/-	Emx-DG-cKO	Emx-DG	CUX1
2	JJ355	-55.94057874606673	Emx-Cre+;DGF/-	Emx-DG-cKO	Emx-DG	CUX1
2	JJ356	-1.046949165077611	Emx-Cre+;DGF/-	Emx-DG-cKO	Emx-DG	CUX1
2	JJ357	6.0815309855871265	Emx-Cre+;DGF/-	Emx-DG-cKO	Emx-DG	CUX1
2	JJ362	-25.043172875389207	Emx-Cre+;DGF/+	Emx-DG-Ctrl	Emx-DG	CUX1
2	JJ363	-17.098463394919538	Emx-Cre+;DGF/+	Emx-DG-Ctrl	Emx-DG	CUX1
2	JJ364	8.558376390530213	Emx-Cre+;DGF/+	Emx-DG-Ctrl	Emx-DG	CUX1
2	JJ365	-36.464371243475135	Emx-Cre+;DGF/+	Emx-DG-Ctrl	Emx-DG	CUX1
2	JJ370	-61.07342296009816	Emx-Cre+;DGF/-	Emx-DG-cKO	Emx-DG	CUX1
2	JJ371	-11.140009543332496	Emx-Cre+;DGF/-	Emx-DG-cKO	Emx-DG	CUX1
2	JJ372	43.94645672839166	Emx-Cre+;DGF/-	Emx-DG-cKO	Emx-DG	CUX1
2	JJ373	-7.685266417449914	Emx-Cre+;DGF/-	Emx-DG-cKO	Emx-DG	CUX1
2	JJ378	141.99638438644692	Emx-Cre+;DGF/-	Emx-DG-cKO	Emx-DG	CUX1
2	JJ379	46.747222185347084	Emx-Cre+;DGF/-	Emx-DG-cKO	Emx-DG	CUX1
2	JJ380	4.57578155267377	Emx-Cre+;DGF/-	Emx-DG-cKO	Emx-DG	CUX1
2	JJ381	55.04937159404701	Emx-Cre+;DGF/-	Emx-DG-cKO	Emx-DG	CUX1
2	JJ386	62.11241185823758	Emx-Cre+;DGF/+	Emx-DG-Ctrl	Emx-DG	CUX1
2	JJ387	-12.598628792830274	Emx-Cre+;DGF/+	Emx-DG-Ctrl	Emx-DG	CUX1
2	JJ388	2.461448882503172	Emx-Cre+;DGF/+	Emx-DG-Ctrl	Emx-DG	CUX1
2	JJ392	-66.00746559313525	Emx-Cre+;DGF/+	Emx-DG-Ctrl	Emx-DG	CUX1
2	JJ393	-33.75913670471971	Emx-Cre+;DGF/+	Emx-DG-Ctrl	Emx-DG	CUX1
2	JJ394	-46.06475802242596	Emx-Cre+;DGF/+	Emx-DG-Ctrl	Emx-DG	CUX1
2	JJ395	-35.66635600698684	Emx-Cre+;DGF/+	Emx-DG-Ctrl	Emx-DG	CUX1
3	JJ001	-25.425122239858894	Emx-Cre+;POMT2F/+	Emx-POMT2-Ctrl	Emx-POMT2	CUX1
3	JJ002	-51.924641683839525	Emx-Cre+;POMT2F/+	Emx-POMT2-Ctrl	Emx-POMT2	CUX1
3	JJ003	-11.183509583095903	Emx-Cre+;POMT2F/+	Emx-POMT2-Ctrl	Emx-POMT2	CUX1
3	JJ004	-48.10414749222908	Emx-Cre+;POMT2F/F	Emx-POMT2-cKO	Emx-POMT2	CUX1
3	JJ005	-18.67673816091956	Emx-Cre+;POMT2F/F	Emx-POMT2-cKO	Emx-POMT2	CUX1
3	JJ006	-43.00300448179271	Emx-Cre+;POMT2F/F	Emx-POMT2-cKO	Emx-POMT2	CUX1
3	JJ007	-51.259171443372246	Emx-Cre+;POMT2F/+	Emx-POMT2-Ctrl	Emx-POMT2	CUX1
3	JJ008	-32.04523268260052	Emx-Cre+;POMT2F/F	Emx-POMT2-cKO	Emx-POMT2	CUX1
3	JJ053	-37.04657198305333	WT	B4GAT1-Ctrl	B4GAT1	CUX1
3	JJ054	-41.421707361754194	WT	B4GAT1-Ctrl	B4GAT1	CUX1
3	JJ055	19.848994468545317	WT	B4GAT1-Ctrl	B4GAT1	CUX1
3	JJ056	-21.570919962420323	WT	B4GAT1-Ctrl	B4GAT1	CUX1
3	JJ057	-0.5042098994030842	B4GAT1M155T/M155T;Thy1	B4GAT1-Mutant	B4GAT1	CUX1
3	JJ058	2.173857768191018	B4GAT1M155T/M155T;Thy1	B4GAT1-Mutant	B4GAT1	CUX1
3	JJ059	60.829786688295634	B4GAT1M155T/M155T;Thy1	B4GAT1-Mutant	B4GAT1	CUX1
3	JJ060	11.047424624891846	B4GAT1M155T/M155T;Thy1	B4GAT1-Mutant	B4GAT1	CUX1
3	JJ069	-34.9379673433048	B4GAT1M155T/M155T;Thy1	B4GAT1-Mutant	B4GAT1	CUX1
3	JJ070	-4.942630158112176	B4GAT1M155T/M155T;Thy1	B4GAT1-Mutant	B4GAT1	CUX1
3	JJ071	-26.712590957864602	B4GAT1M155T/M155T	B4GAT1-Mutant	B4GAT1	CUX1
3	JJ072	-79.20012388613922	B4GAT1M155T/M155T	B4GAT1-Mutant	B4GAT1	CUX1
3	JJ073	-38.73722081698255	B4GAT1M155T/M155T	B4GAT1-Mutant	B4GAT1	CUX1
3	JJ074	-40.458654824175824	B4GAT1M155T/M155T	B4GAT1-Mutant	B4GAT1	CUX1
3	JJ075	-18.393178279184593	B4GAT1M155T/M155T;Thy1	B4GAT1-Mutant	B4GAT1	CUX1
3	JJ076	-39.85774074781015	B4GAT1M155T/M155T;Thy1	B4GAT1-Mutant	B4GAT1	CUX1
3	JJ086	-87.12209062216328	B4GAT1M155T/M155T	B4GAT1-Mutant	B4GAT1	CUX1
3	JJ087	-110.40195387493505	B4GAT1M155T/M155T	B4GAT1-Mutant	B4GAT1	CUX1
3	JJ088	-69.34511606135531	B4GAT1M155T/M155T	B4GAT1-Mutant	B4GAT1	CUX1
3	JJ089	-79.49802141938419	B4GAT1M155T/M155T	B4GAT1-Mutant	B4GAT1	CUX1
3	JJ090	-43.83276217094018	B4GAT1M155T/M155T;Thy1	B4GAT1-Mutant	B4GAT1	CUX1
3	JJ091	-30.861608341621793	B4GAT1M155T/M155T;Thy1	B4GAT1-Mutant	B4GAT1	CUX1
3	JJ092	-68.44514966463402	B4GAT1M155T/M155T;Thy1	B4GAT1-Mutant	B4GAT1	CUX1
3	JJ093	-23.18808955176769	B4GAT1M155T/M155T;Thy1	B4GAT1-Mutant	B4GAT1	CUX1
3	JJ106	-127.50719925176834	WT	B4GAT1-Ctrl	B4GAT1	CUX1
3	JJ107	-79.3979955021011	WT	B4GAT1-Ctrl	B4GAT1	CUX1
3	JJ108	-51.2915721530095	WT	B4GAT1-Ctrl	B4GAT1	CUX1
3	JJ109	-82.5525750790702	WT	B4GAT1-Ctrl	B4GAT1	CUX1
3	JJ114	-41.59101668886952	WT	B4GAT1-Ctrl	B4GAT1	CUX1
3	JJ115	-79.9574024088494	WT	B4GAT1-Ctrl	B4GAT1	CUX1
3	JJ116	-0.36527492990444443	WT	B4GAT1-Ctrl	B4GAT1	CUX1
3	JJ117	-62.1619349519198	WT	B4GAT1-Ctrl	B4GAT1	CUX1
3	JJ118	-17.672844551358065	Emx-Cre+;DGF/-	Emx-DG-cKO	Emx-DG	CUX1
3	JJ119	-28.13345235004702	Emx-Cre+;DGF/-	Emx-DG-cKO	Emx-DG	CUX1
3	JJ120	-0.4110954723195543	Emx-Cre+;DGF/-	Emx-DG-cKO	Emx-DG	CUX1
3	JJ121	-2.025166806980792	Emx-Cre+;DGF/-	Emx-DG-cKO	Emx-DG	CUX1
3	JJ126	-40.9634711111111	Emx-Cre+;DGF/-	Emx-DG-cKO	Emx-DG	CUX1
3	JJ127	6.04163384250478	Emx-Cre+;DGF/-	Emx-DG-cKO	Emx-DG	CUX1
3	JJ128	42.17359365163736	Emx-Cre+;DGF/-	Emx-DG-cKO	Emx-DG	CUX1
3	JJ129	33.0626033316013	Emx-Cre+;DGF/-	Emx-DG-cKO	Emx-DG	CUX1
3	JJ138	4.450522998972626	Emx-Cre+;DGF/+	Emx-DG-Ctrl	Emx-DG	CUX1
3	JJ139	15.827346540318766	Emx-Cre+;DGF/+	Emx-DG-Ctrl	Emx-DG	CUX1
3	JJ140	-6.842579610771016	Emx-Cre+;DGF/+	Emx-DG-Ctrl	Emx-DG	CUX1
3	JJ141	10.13674768050445	Emx-Cre+;DGF/+	Emx-DG-Ctrl	Emx-DG	CUX1
3	JJ158	-46.90365738295736	Emx-Cre+;POMT2F/F	Emx-POMT2-cKO	Emx-POMT2	CUX1
3	JJ159	-43.24609767685123	Emx-Cre+;POMT2F/F	Emx-POMT2-cKO	Emx-POMT2	CUX1
3	JJ160	-37.29481662784067	Emx-Cre+;POMT2F/F	Emx-POMT2-cKO	Emx-POMT2	CUX1
3	JJ161	-22.1706207332057	Emx-Cre+;POMT2F/F	Emx-POMT2-cKO	Emx-POMT2	CUX1
3	JJ162	-24.191092877271046	Emx-Cre+;POMT2F/+	Emx-POMT2-Ctrl	Emx-POMT2	CUX1
3	JJ163	-44.33470424431162	Emx-Cre+;POMT2F/+	Emx-POMT2-Ctrl	Emx-POMT2	CUX1
3	JJ164	-35.00225634779385	Emx-Cre+;POMT2F/+	Emx-POMT2-Ctrl	Emx-POMT2	CUX1
3	JJ165	-45.003223635123675	Emx-Cre+;POMT2F/+	Emx-POMT2-Ctrl	Emx-POMT2	CUX1
3	JJ190	40.54442925588021	Emx-Cre+;POMT2F/F	Emx-POMT2-cKO	Emx-POMT2	CUX1
3	JJ191	-9.420819900720915	Emx-Cre+;POMT2F/F	Emx-POMT2-cKO	Emx-POMT2	CUX1
3	JJ192	-37.94115068355018	Emx-Cre+;POMT2F/F	Emx-POMT2-cKO	Emx-POMT2	CUX1
3	JJ193	-8.943750841048066	Emx-Cre+;POMT2F/F	Emx-POMT2-cKO	Emx-POMT2	CUX1
3	JJ198	-39.53266610143064	Emx-Cre+;POMT2F/+	Emx-POMT2-Ctrl	Emx-POMT2	CUX1
3	JJ199	-57.673640021993435	Emx-Cre+;POMT2F/+	Emx-POMT2-Ctrl	Emx-POMT2	CUX1
3	JJ200	-21.812004815456152	Emx-Cre+;POMT2F/+	Emx-POMT2-Ctrl	Emx-POMT2	CUX1
3	JJ201	-6.229947465885648	Emx-Cre+;POMT2F/+	Emx-POMT2-Ctrl	Emx-POMT2	CUX1
3	JJ206	-38.58479565060542	Emx-Cre+;POMT2F/+	Emx-POMT2-Ctrl	Emx-POMT2	CUX1
3	JJ207	-39.98397290913797	Emx-Cre+;POMT2F/+	Emx-POMT2-Ctrl	Emx-POMT2	CUX1
3	JJ208	-27.495235973565723	Emx-Cre+;POMT2F/+	Emx-POMT2-Ctrl	Emx-POMT2	CUX1
3	JJ209	-40.74349346081183	Emx-Cre+;POMT2F/+	Emx-POMT2-Ctrl	Emx-POMT2	CUX1
3	JJ226	-37.394947755437784	WT	ICD-Ctrl	ICD	CUX1
3	JJ227	-20.010861190292342	DGdelta/-	ICD-Mutant	ICD	CUX1
3	JJ228	-17.680201851193942	DGdelta/-	ICD-Mutant	ICD	CUX1
3	JJ229	4.047268244477739	DGdelta/-	ICD-Mutant	ICD	CUX1
3	JJ230	-21.508147456986194	DGdelta/-	ICD-Mutant	ICD	CUX1
3	JJ235	-46.22160008919783	WT	ICD-Ctrl	ICD	CUX1
3	JJ236	-31.496236398905506	WT	ICD-Ctrl	ICD	CUX1
3	JJ237	-20.490876525737008	WT	ICD-Ctrl	ICD	CUX1
3	JJ258	-63.05125706996603	FKRPMut	FKRP-Mutant	FKRP	CUX1
3	JJ259	-48.550394411521125	FKRPMut	FKRP-Mutant	FKRP	CUX1
3	JJ260	-64.40654226972626	FKRPMut	FKRP-Mutant	FKRP	CUX1
3	JJ261	-54.33490551804276	FKRPMut	FKRP-Mutant	FKRP	CUX1
3	JJ262	-98.25143040534199	WT	FKRP-Ctrl	FKRP	CUX1
3	JJ263	-121.89697023417726	WT	FKRP-Ctrl	FKRP	CUX1
3	JJ264	-81.23021487131868	WT	FKRP-Ctrl	FKRP	CUX1
3	JJ265	-67.76498922803894	WT	FKRP-Ctrl	FKRP	CUX1
3	JJ266	-106.04906360736794	WT	FKRP-Ctrl	FKRP	CUX1
3	JJ267	-99.99885995737935	WT	FKRP-Ctrl	FKRP	CUX1
3	JJ268	-83.62950341235499	WT	FKRP-Ctrl	FKRP	CUX1
3	JJ269	-86.28948029301037	WT	FKRP-Ctrl	FKRP	CUX1
3	JJ270	-24.732481415954428	FKRPMut	FKRP-Mutant	FKRP	CUX1
3	JJ271	7.899023324556121	FKRPMut	FKRP-Mutant	FKRP	CUX1
3	JJ272	12.480097759529055	FKRPMut	FKRP-Mutant	FKRP	CUX1
3	JJ273	10.979764083421982	FKRPMut	FKRP-Mutant	FKRP	CUX1
3	JJ274	-35.59417508875057	WT	FKRP-Ctrl	FKRP	CUX1
3	JJ275	-49.99794951023009	WT	FKRP-Ctrl	FKRP	CUX1
3	JJ276	2.2187806421958007	WT	FKRP-Ctrl	FKRP	CUX1
3	JJ277	-39.50827638426055	WT	FKRP-Ctrl	FKRP	CUX1
3	JJ306	-71.42261566078578	DGdelta/-	ICD-Mutant	ICD	CUX1
3	JJ307	-70.81966317725282	DGdelta/-	ICD-Mutant	ICD	CUX1
3	JJ308	-51.38663788067473	DGdelta/-	ICD-Mutant	ICD	CUX1
3	JJ309	-15.709365404650422	DGdelta/-	ICD-Mutant	ICD	CUX1
3	JJ314	-28.139142079819106	DGdelta/-	ICD-Mutant	ICD	CUX1
3	JJ315	-21.455691834382037	DGdelta/-	ICD-Mutant	ICD	CUX1
3	JJ316	-4.024888112142587	DGdelta/-	ICD-Mutant	ICD	CUX1
3	JJ317	-14.05556246659944	DGdelta/-	ICD-Mutant	ICD	CUX1
3	JJ322	-36.32862252926967	WT	ICD-Ctrl	ICD	CUX1
3	JJ323	-68.22721553222978	WT	ICD-Ctrl	ICD	CUX1
3	JJ324	-16.372426035715574	WT	ICD-Ctrl	ICD	CUX1
3	JJ325	-5.859802298050643	WT	ICD-Ctrl	ICD	CUX1
3	JJ330	-19.449488028188323	WT	ICD-Ctrl	ICD	CUX1
3	JJ331	43.2569081221186	WT	ICD-Ctrl	ICD	CUX1
3	JJ332	2.367314396109691	WT	ICD-Ctrl	ICD	CUX1
3	JJ333	-13.952109941117518	WT	ICD-Ctrl	ICD	CUX1
3	JJ346	68.16211221132816	FKRPMut	FKRP-Mutant	FKRP	CUX1
3	JJ347	2.8388997293877005	FKRPMut	FKRP-Mutant	FKRP	CUX1
3	JJ348	109.11816315534759	FKRPMut	FKRP-Mutant	FKRP	CUX1
3	JJ349	-23.993119702391784	FKRPMut	FKRP-Mutant	FKRP	CUX1
3	JJ350	8.45151324328981	WT	FKRP-Ctrl	FKRP	CUX1
3	JJ351	5.1866261750115354	WT	FKRP-Ctrl	FKRP	CUX1
3	JJ352	59.82887748240686	WT	FKRP-Ctrl	FKRP	CUX1
3	JJ353	-7.289676771822466	WT	FKRP-Ctrl	FKRP	CUX1
3	JJ354	-55.2505317124519	Emx-Cre+;DGF/-	Emx-DG-cKO	Emx-DG	CUX1
3	JJ355	-53.14019070400127	Emx-Cre+;DGF/-	Emx-DG-cKO	Emx-DG	CUX1
3	JJ356	82.43110929262225	Emx-Cre+;DGF/-	Emx-DG-cKO	Emx-DG	CUX1
3	JJ357	-28.318904656141285	Emx-Cre+;DGF/-	Emx-DG-cKO	Emx-DG	CUX1
3	JJ362	-27.451453330738406	Emx-Cre+;DGF/+	Emx-DG-Ctrl	Emx-DG	CUX1
3	JJ363	-20.423597025871914	Emx-Cre+;DGF/+	Emx-DG-Ctrl	Emx-DG	CUX1
3	JJ364	14.485230750743256	Emx-Cre+;DGF/+	Emx-DG-Ctrl	Emx-DG	CUX1
3	JJ365	-25.133481157350086	Emx-Cre+;DGF/+	Emx-DG-Ctrl	Emx-DG	CUX1
3	JJ370	-46.89784951822143	Emx-Cre+;DGF/-	Emx-DG-cKO	Emx-DG	CUX1
3	JJ371	6.138808383838371	Emx-Cre+;DGF/-	Emx-DG-cKO	Emx-DG	CUX1
3	JJ372	0.6937647728692203	Emx-Cre+;DGF/-	Emx-DG-cKO	Emx-DG	CUX1
3	JJ373	-22.24737361849259	Emx-Cre+;DGF/-	Emx-DG-cKO	Emx-DG	CUX1
3	JJ378	304.5998460958486	Emx-Cre+;DGF/-	Emx-DG-cKO	Emx-DG	CUX1
3	JJ379	51.391113629660005	Emx-Cre+;DGF/-	Emx-DG-cKO	Emx-DG	CUX1
3	JJ380	-26.466915780537914	Emx-Cre+;DGF/-	Emx-DG-cKO	Emx-DG	CUX1
3	JJ381	66.22769218704599	Emx-Cre+;DGF/-	Emx-DG-cKO	Emx-DG	CUX1
3	JJ386	57.35352105363984	Emx-Cre+;DGF/+	Emx-DG-Ctrl	Emx-DG	CUX1
3	JJ387	-9.74623469310285	Emx-Cre+;DGF/+	Emx-DG-Ctrl	Emx-DG	CUX1
3	JJ388	11.26634469741625	Emx-Cre+;DGF/+	Emx-DG-Ctrl	Emx-DG	CUX1
3	JJ392	-58.217583114502794	Emx-Cre+;DGF/+	Emx-DG-Ctrl	Emx-DG	CUX1
3	JJ393	-3.8920021442077846	Emx-Cre+;DGF/+	Emx-DG-Ctrl	Emx-DG	CUX1
3	JJ394	-42.87974759458431	Emx-Cre+;DGF/+	Emx-DG-Ctrl	Emx-DG	CUX1
3	JJ395	-35.41516487460433	Emx-Cre+;DGF/+	Emx-DG-Ctrl	Emx-DG	CUX1
4	JJ001	-27.098078650793656	Emx-Cre+;POMT2F/+	Emx-POMT2-Ctrl	Emx-POMT2	CUX1
4	JJ002	-49.31947298599147	Emx-Cre+;POMT2F/+	Emx-POMT2-Ctrl	Emx-POMT2	CUX1
4	JJ003	-11.135776914529913	Emx-Cre+;POMT2F/+	Emx-POMT2-Ctrl	Emx-POMT2	CUX1
4	JJ004	-42.014122967704566	Emx-Cre+;POMT2F/F	Emx-POMT2-cKO	Emx-POMT2	CUX1
4	JJ005	-5.283245440613048	Emx-Cre+;POMT2F/F	Emx-POMT2-cKO	Emx-POMT2	CUX1
4	JJ006	-27.62247757405993	Emx-Cre+;POMT2F/F	Emx-POMT2-cKO	Emx-POMT2	CUX1
4	JJ007	-43.28049388808802	Emx-Cre+;POMT2F/+	Emx-POMT2-Ctrl	Emx-POMT2	CUX1
4	JJ008	-23.52381755154168	Emx-Cre+;POMT2F/F	Emx-POMT2-cKO	Emx-POMT2	CUX1
4	JJ053	-31.422835332923967	WT	B4GAT1-Ctrl	B4GAT1	CUX1
4	JJ054	-39.025711330008164	WT	B4GAT1-Ctrl	B4GAT1	CUX1
4	JJ055	4.77067522494129	WT	B4GAT1-Ctrl	B4GAT1	CUX1
4	JJ056	-41.316620613620955	WT	B4GAT1-Ctrl	B4GAT1	CUX1
4	JJ057	-6.056667827770998	B4GAT1M155T/M155T;Thy1	B4GAT1-Mutant	B4GAT1	CUX1
4	JJ058	18.23613759056938	B4GAT1M155T/M155T;Thy1	B4GAT1-Mutant	B4GAT1	CUX1
4	JJ059	58.52249923309849	B4GAT1M155T/M155T;Thy1	B4GAT1-Mutant	B4GAT1	CUX1
4	JJ060	25.493687892720327	B4GAT1M155T/M155T;Thy1	B4GAT1-Mutant	B4GAT1	CUX1
4	JJ069	-20.052424133428264	B4GAT1M155T/M155T;Thy1	B4GAT1-Mutant	B4GAT1	CUX1
4	JJ070	52.11577610016419	B4GAT1M155T/M155T;Thy1	B4GAT1-Mutant	B4GAT1	CUX1
4	JJ071	-19.348842444300885	B4GAT1M155T/M155T	B4GAT1-Mutant	B4GAT1	CUX1
4	JJ072	-71.4992370343437	B4GAT1M155T/M155T	B4GAT1-Mutant	B4GAT1	CUX1
4	JJ073	-19.4525268797845	B4GAT1M155T/M155T	B4GAT1-Mutant	B4GAT1	CUX1
4	JJ074	-35.07165984384752	B4GAT1M155T/M155T	B4GAT1-Mutant	B4GAT1	CUX1
4	JJ075	-19.709063047194338	B4GAT1M155T/M155T;Thy1	B4GAT1-Mutant	B4GAT1	CUX1
4	JJ076	-26.747513827210582	B4GAT1M155T/M155T;Thy1	B4GAT1-Mutant	B4GAT1	CUX1
4	JJ086	-88.11269709873272	B4GAT1M155T/M155T	B4GAT1-Mutant	B4GAT1	CUX1
4	JJ087	-106.61906457768907	B4GAT1M155T/M155T	B4GAT1-Mutant	B4GAT1	CUX1
4	JJ088	-80.68275439468864	B4GAT1M155T/M155T	B4GAT1-Mutant	B4GAT1	CUX1
4	JJ089	-82.31774190300682	B4GAT1M155T/M155T	B4GAT1-Mutant	B4GAT1	CUX1
4	JJ090	-50.9072758651472	B4GAT1M155T/M155T;Thy1	B4GAT1-Mutant	B4GAT1	CUX1
4	JJ091	-28.073330395354674	B4GAT1M155T/M155T;Thy1	B4GAT1-Mutant	B4GAT1	CUX1
4	JJ092	-59.24737954337593	B4GAT1M155T/M155T;Thy1	B4GAT1-Mutant	B4GAT1	CUX1
4	JJ093	-1.1297167613636248	B4GAT1M155T/M155T;Thy1	B4GAT1-Mutant	B4GAT1	CUX1
4	JJ106	-102.91724801359828	WT	B4GAT1-Ctrl	B4GAT1	CUX1
4	JJ107	-88.89138282134472	WT	B4GAT1-Ctrl	B4GAT1	CUX1
4	JJ108	-54.80524132147616	WT	B4GAT1-Ctrl	B4GAT1	CUX1
4	JJ109	-56.52686345699658	WT	B4GAT1-Ctrl	B4GAT1	CUX1
4	JJ114	-66.88014321536718	WT	B4GAT1-Ctrl	B4GAT1	CUX1
4	JJ115	-68.6950122840193	WT	B4GAT1-Ctrl	B4GAT1	CUX1
4	JJ116	-3.741765351360376	WT	B4GAT1-Ctrl	B4GAT1	CUX1
4	JJ117	-65.30435065935876	WT	B4GAT1-Ctrl	B4GAT1	CUX1
4	JJ118	-31.05779891412419	Emx-Cre+;DGF/-	Emx-DG-cKO	Emx-DG	CUX1
4	JJ119	-32.9976768880155	Emx-Cre+;DGF/-	Emx-DG-cKO	Emx-DG	CUX1
4	JJ120	-4.9493180267174735	Emx-Cre+;DGF/-	Emx-DG-cKO	Emx-DG	CUX1
4	JJ121	-3.6369782936011084	Emx-Cre+;DGF/-	Emx-DG-cKO	Emx-DG	CUX1
4	JJ126	-23.725284731182796	Emx-Cre+;DGF/-	Emx-DG-cKO	Emx-DG	CUX1
4	JJ127	32.692574474632465	Emx-Cre+;DGF/-	Emx-DG-cKO	Emx-DG	CUX1
4	JJ128	23.603888161249603	Emx-Cre+;DGF/-	Emx-DG-cKO	Emx-DG	CUX1
4	JJ129	20.564946448532584	Emx-Cre+;DGF/-	Emx-DG-cKO	Emx-DG	CUX1
4	JJ138	1.5824980715841737	Emx-Cre+;DGF/+	Emx-DG-Ctrl	Emx-DG	CUX1
4	JJ139	50.1001822478211	Emx-Cre+;DGF/+	Emx-DG-Ctrl	Emx-DG	CUX1
4	JJ140	-4.4966325833393626	Emx-Cre+;DGF/+	Emx-DG-Ctrl	Emx-DG	CUX1
4	JJ141	-0.23567616208813055	Emx-Cre+;DGF/+	Emx-DG-Ctrl	Emx-DG	CUX1
4	JJ158	-28.42835084700967	Emx-Cre+;POMT2F/F	Emx-POMT2-cKO	Emx-POMT2	CUX1
4	JJ159	-26.291308667809194	Emx-Cre+;POMT2F/F	Emx-POMT2-cKO	Emx-POMT2	CUX1
4	JJ160	-21.0012760833164	Emx-Cre+;POMT2F/F	Emx-POMT2-cKO	Emx-POMT2	CUX1
4	JJ161	-10.41490192608694	Emx-Cre+;POMT2F/F	Emx-POMT2-cKO	Emx-POMT2	CUX1
4	JJ162	-19.639641016296764	Emx-Cre+;POMT2F/+	Emx-POMT2-Ctrl	Emx-POMT2	CUX1
4	JJ163	-32.47369788726858	Emx-Cre+;POMT2F/+	Emx-POMT2-Ctrl	Emx-POMT2	CUX1
4	JJ164	-27.114983649734295	Emx-Cre+;POMT2F/+	Emx-POMT2-Ctrl	Emx-POMT2	CUX1
4	JJ165	-40.29071106913324	Emx-Cre+;POMT2F/+	Emx-POMT2-Ctrl	Emx-POMT2	CUX1
4	JJ190	38.81348520029204	Emx-Cre+;POMT2F/F	Emx-POMT2-cKO	Emx-POMT2	CUX1
4	JJ191	32.27506283999268	Emx-Cre+;POMT2F/F	Emx-POMT2-cKO	Emx-POMT2	CUX1
4	JJ192	-24.733206080983717	Emx-Cre+;POMT2F/F	Emx-POMT2-cKO	Emx-POMT2	CUX1
4	JJ193	-10.72163817022213	Emx-Cre+;POMT2F/F	Emx-POMT2-cKO	Emx-POMT2	CUX1
4	JJ198	6.111087915663404	Emx-Cre+;POMT2F/+	Emx-POMT2-Ctrl	Emx-POMT2	CUX1
4	JJ199	-53.048789832059924	Emx-Cre+;POMT2F/+	Emx-POMT2-Ctrl	Emx-POMT2	CUX1
4	JJ200	-32.26069720522687	Emx-Cre+;POMT2F/+	Emx-POMT2-Ctrl	Emx-POMT2	CUX1
4	JJ201	-23.388066334143826	Emx-Cre+;POMT2F/+	Emx-POMT2-Ctrl	Emx-POMT2	CUX1
4	JJ206	-32.64115916149067	Emx-Cre+;POMT2F/+	Emx-POMT2-Ctrl	Emx-POMT2	CUX1
4	JJ207	-33.27004923073906	Emx-Cre+;POMT2F/+	Emx-POMT2-Ctrl	Emx-POMT2	CUX1
4	JJ208	-26.73981797815594	Emx-Cre+;POMT2F/+	Emx-POMT2-Ctrl	Emx-POMT2	CUX1
4	JJ209	-27.805058341699276	Emx-Cre+;POMT2F/+	Emx-POMT2-Ctrl	Emx-POMT2	CUX1
4	JJ226	-20.2040923914531	WT	ICD-Ctrl	ICD	CUX1
4	JJ227	-2.356655844913045	DGdelta/-	ICD-Mutant	ICD	CUX1
4	JJ228	17.039724415521807	DGdelta/-	ICD-Mutant	ICD	CUX1
4	JJ229	0.5401249960302721	DGdelta/-	ICD-Mutant	ICD	CUX1
4	JJ230	-18.810753319119232	DGdelta/-	ICD-Mutant	ICD	CUX1
4	JJ235	-31.374702051474248	WT	ICD-Ctrl	ICD	CUX1
4	JJ236	-28.960202117031486	WT	ICD-Ctrl	ICD	CUX1
4	JJ237	-43.55185518031999	WT	ICD-Ctrl	ICD	CUX1
4	JJ258	-57.64609022673634	FKRPMut	FKRP-Mutant	FKRP	CUX1
4	JJ259	-42.36195597066089	FKRPMut	FKRP-Mutant	FKRP	CUX1
4	JJ260	-63.21080883977455	FKRPMut	FKRP-Mutant	FKRP	CUX1
4	JJ261	-58.57112206759624	FKRPMut	FKRP-Mutant	FKRP	CUX1
4	JJ262	-86.46065554030707	WT	FKRP-Ctrl	FKRP	CUX1
4	JJ263	-113.99544257101456	WT	FKRP-Ctrl	FKRP	CUX1
4	JJ264	-43.27578018939835	WT	FKRP-Ctrl	FKRP	CUX1
4	JJ265	-66.3710311074518	WT	FKRP-Ctrl	FKRP	CUX1
4	JJ266	-83.26338825915047	WT	FKRP-Ctrl	FKRP	CUX1
4	JJ267	-73.69577009209695	WT	FKRP-Ctrl	FKRP	CUX1
4	JJ268	-60.847957416599655	WT	FKRP-Ctrl	FKRP	CUX1
4	JJ269	-59.21617015221554	WT	FKRP-Ctrl	FKRP	CUX1
4	JJ270	-32.87666189553656	FKRPMut	FKRP-Mutant	FKRP	CUX1
4	JJ271	5.661450210876739	FKRPMut	FKRP-Mutant	FKRP	CUX1
4	JJ272	4.373187632937881	FKRPMut	FKRP-Mutant	FKRP	CUX1
4	JJ273	9.735231210654067	FKRPMut	FKRP-Mutant	FKRP	CUX1
4	JJ274	-34.25272096420866	WT	FKRP-Ctrl	FKRP	CUX1
4	JJ275	-10.348783314276318	WT	FKRP-Ctrl	FKRP	CUX1
4	JJ276	0.7054724852293172	WT	FKRP-Ctrl	FKRP	CUX1
4	JJ277	-34.013523901392034	WT	FKRP-Ctrl	FKRP	CUX1
4	JJ306	-59.095550890652554	DGdelta/-	ICD-Mutant	ICD	CUX1
4	JJ307	-67.46739698677663	DGdelta/-	ICD-Mutant	ICD	CUX1
4	JJ308	-2.8829553764505818	DGdelta/-	ICD-Mutant	ICD	CUX1
4	JJ309	-16.52469335809792	DGdelta/-	ICD-Mutant	ICD	CUX1
4	JJ314	-32.95808642884242	DGdelta/-	ICD-Mutant	ICD	CUX1
4	JJ315	-13.244040967471127	DGdelta/-	ICD-Mutant	ICD	CUX1
4	JJ316	2.4664236827291384	DGdelta/-	ICD-Mutant	ICD	CUX1
4	JJ317	-6.428955546412794	DGdelta/-	ICD-Mutant	ICD	CUX1
4	JJ322	17.75419296045281	WT	ICD-Ctrl	ICD	CUX1
4	JJ323	-61.256011766207735	WT	ICD-Ctrl	ICD	CUX1
4	JJ324	-33.50962482673011	WT	ICD-Ctrl	ICD	CUX1
4	JJ325	-4.887748923455888	WT	ICD-Ctrl	ICD	CUX1
4	JJ330	-14.985666599616897	WT	ICD-Ctrl	ICD	CUX1
4	JJ331	54.4078426138963	WT	ICD-Ctrl	ICD	CUX1
4	JJ332	6.455538190476204	WT	ICD-Ctrl	ICD	CUX1
4	JJ333	-30.794480202565712	WT	ICD-Ctrl	ICD	CUX1
4	JJ346	32.61221527822905	FKRPMut	FKRP-Mutant	FKRP	CUX1
4	JJ347	-15.95994996203452	FKRPMut	FKRP-Mutant	FKRP	CUX1
4	JJ348	50.42117221765405	FKRPMut	FKRP-Mutant	FKRP	CUX1
4	JJ349	-8.092934344971468	FKRPMut	FKRP-Mutant	FKRP	CUX1
4	JJ350	-18.765055218248637	WT	FKRP-Ctrl	FKRP	CUX1
4	JJ351	-16.23736905158152	WT	FKRP-Ctrl	FKRP	CUX1
4	JJ352	6.9870721178170925	WT	FKRP-Ctrl	FKRP	CUX1
4	JJ353	38.46806558616523	WT	FKRP-Ctrl	FKRP	CUX1
4	JJ354	-42.12581493776054	Emx-Cre+;DGF/-	Emx-DG-cKO	Emx-DG	CUX1
4	JJ355	-36.6525543870924	Emx-Cre+;DGF/-	Emx-DG-cKO	Emx-DG	CUX1
4	JJ356	175.85013057630167	Emx-Cre+;DGF/-	Emx-DG-cKO	Emx-DG	CUX1
4	JJ357	6.894128924249799	Emx-Cre+;DGF/-	Emx-DG-cKO	Emx-DG	CUX1
4	JJ362	-14.829130239875402	Emx-Cre+;DGF/+	Emx-DG-Ctrl	Emx-DG	CUX1
4	JJ363	0.6402715858081743	Emx-Cre+;DGF/+	Emx-DG-Ctrl	Emx-DG	CUX1
4	JJ364	10.256342677329826	Emx-Cre+;DGF/+	Emx-DG-Ctrl	Emx-DG	CUX1
4	JJ365	-21.693566457150343	Emx-Cre+;DGF/+	Emx-DG-Ctrl	Emx-DG	CUX1
4	JJ370	-38.29305361486005	Emx-Cre+;DGF/-	Emx-DG-cKO	Emx-DG	CUX1
4	JJ371	83.06193723537898	Emx-Cre+;DGF/-	Emx-DG-cKO	Emx-DG	CUX1
4	JJ372	14.884171215939583	Emx-Cre+;DGF/-	Emx-DG-cKO	Emx-DG	CUX1
4	JJ373	-41.004511701834964	Emx-Cre+;DGF/-	Emx-DG-cKO	Emx-DG	CUX1
4	JJ378	213.84632206925792	Emx-Cre+;DGF/-	Emx-DG-cKO	Emx-DG	CUX1
4	JJ379	46.95232381469265	Emx-Cre+;DGF/-	Emx-DG-cKO	Emx-DG	CUX1
4	JJ380	-25.300674625487165	Emx-Cre+;DGF/-	Emx-DG-cKO	Emx-DG	CUX1
4	JJ381	86.87938002795507	Emx-Cre+;DGF/-	Emx-DG-cKO	Emx-DG	CUX1
4	JJ386	60.61890611111111	Emx-Cre+;DGF/+	Emx-DG-Ctrl	Emx-DG	CUX1
4	JJ387	-9.965302514170673	Emx-Cre+;DGF/+	Emx-DG-Ctrl	Emx-DG	CUX1
4	JJ388	27.097185988309263	Emx-Cre+;DGF/+	Emx-DG-Ctrl	Emx-DG	CUX1
4	JJ392	-29.29222383489351	Emx-Cre+;DGF/+	Emx-DG-Ctrl	Emx-DG	CUX1
4	JJ393	-31.799240543103565	Emx-Cre+;DGF/+	Emx-DG-Ctrl	Emx-DG	CUX1
4	JJ394	-27.61147883979504	Emx-Cre+;DGF/+	Emx-DG-Ctrl	Emx-DG	CUX1
4	JJ395	-32.16226673162455	Emx-Cre+;DGF/+	Emx-DG-Ctrl	Emx-DG	CUX1
5	JJ001	-4.5181044444444565	Emx-Cre+;POMT2F/+	Emx-POMT2-Ctrl	Emx-POMT2	CUX1
5	JJ002	-38.5590433467901	Emx-Cre+;POMT2F/+	Emx-POMT2-Ctrl	Emx-POMT2	CUX1
5	JJ003	-13.215926487179482	Emx-Cre+;POMT2F/+	Emx-POMT2-Ctrl	Emx-POMT2	CUX1
5	JJ004	-26.89137597070756	Emx-Cre+;POMT2F/F	Emx-POMT2-cKO	Emx-POMT2	CUX1
5	JJ005	-14.606069961685838	Emx-Cre+;POMT2F/F	Emx-POMT2-cKO	Emx-POMT2	CUX1
5	JJ006	-2.2080789746201503	Emx-Cre+;POMT2F/F	Emx-POMT2-cKO	Emx-POMT2	CUX1
5	JJ007	-33.845078268769065	Emx-Cre+;POMT2F/+	Emx-POMT2-Ctrl	Emx-POMT2	CUX1
5	JJ008	-18.903420771757	Emx-Cre+;POMT2F/F	Emx-POMT2-cKO	Emx-POMT2	CUX1
5	JJ053	-39.67166611672724	WT	B4GAT1-Ctrl	B4GAT1	CUX1
5	JJ054	-22.176480002446834	WT	B4GAT1-Ctrl	B4GAT1	CUX1
5	JJ055	-0.899648097268558	WT	B4GAT1-Ctrl	B4GAT1	CUX1
5	JJ056	-47.42968325369693	WT	B4GAT1-Ctrl	B4GAT1	CUX1
5	JJ057	5.462000210487038	B4GAT1M155T/M155T;Thy1	B4GAT1-Mutant	B4GAT1	CUX1
5	JJ058	10.947742571782442	B4GAT1M155T/M155T;Thy1	B4GAT1-Mutant	B4GAT1	CUX1
5	JJ059	57.45749457360034	B4GAT1M155T/M155T;Thy1	B4GAT1-Mutant	B4GAT1	CUX1
5	JJ060	12.926151247064675	B4GAT1M155T/M155T;Thy1	B4GAT1-Mutant	B4GAT1	CUX1
5	JJ069	7.344496264075474	B4GAT1M155T/M155T;Thy1	B4GAT1-Mutant	B4GAT1	CUX1
5	JJ070	25.942698021346434	B4GAT1M155T/M155T;Thy1	B4GAT1-Mutant	B4GAT1	CUX1
5	JJ071	-2.3334059496361306	B4GAT1M155T/M155T	B4GAT1-Mutant	B4GAT1	CUX1
5	JJ072	-47.95014255104926	B4GAT1M155T/M155T	B4GAT1-Mutant	B4GAT1	CUX1
5	JJ073	-13.11391199126721	B4GAT1M155T/M155T	B4GAT1-Mutant	B4GAT1	CUX1
5	JJ074	-18.07427934934204	B4GAT1M155T/M155T	B4GAT1-Mutant	B4GAT1	CUX1
5	JJ075	2.487082630195838	B4GAT1M155T/M155T;Thy1	B4GAT1-Mutant	B4GAT1	CUX1
5	JJ076	-44.026664912102625	B4GAT1M155T/M155T;Thy1	B4GAT1-Mutant	B4GAT1	CUX1
5	JJ086	-80.73807691747716	B4GAT1M155T/M155T	B4GAT1-Mutant	B4GAT1	CUX1
5	JJ087	-71.7135994481273	B4GAT1M155T/M155T	B4GAT1-Mutant	B4GAT1	CUX1
5	JJ088	-60.089876024725264	B4GAT1M155T/M155T	B4GAT1-Mutant	B4GAT1	CUX1
5	JJ089	-49.91067283680733	B4GAT1M155T/M155T	B4GAT1-Mutant	B4GAT1	CUX1
5	JJ090	-37.94526576068373	B4GAT1M155T/M155T;Thy1	B4GAT1-Mutant	B4GAT1	CUX1
5	JJ091	-24.67897879041641	B4GAT1M155T/M155T;Thy1	B4GAT1-Mutant	B4GAT1	CUX1
5	JJ092	-55.52483802512406	B4GAT1M155T/M155T;Thy1	B4GAT1-Mutant	B4GAT1	CUX1
5	JJ093	-40.22334618055553	B4GAT1M155T/M155T;Thy1	B4GAT1-Mutant	B4GAT1	CUX1
5	JJ106	-75.16828628520322	WT	B4GAT1-Ctrl	B4GAT1	CUX1
5	JJ107	-102.6317118536028	WT	B4GAT1-Ctrl	B4GAT1	CUX1
5	JJ108	-38.09831318458877	WT	B4GAT1-Ctrl	B4GAT1	CUX1
5	JJ109	-37.30719586275237	WT	B4GAT1-Ctrl	B4GAT1	CUX1
5	JJ114	-54.034750271818815	WT	B4GAT1-Ctrl	B4GAT1	CUX1
5	JJ115	-50.91543877023855	WT	B4GAT1-Ctrl	B4GAT1	CUX1
5	JJ116	61.71578254135992	WT	B4GAT1-Ctrl	B4GAT1	CUX1
5	JJ117	-56.98719357398272	WT	B4GAT1-Ctrl	B4GAT1	CUX1
5	JJ118	-22.371995111582162	Emx-Cre+;DGF/-	Emx-DG-cKO	Emx-DG	CUX1
5	JJ119	-38.08460387269249	Emx-Cre+;DGF/-	Emx-DG-cKO	Emx-DG	CUX1
5	JJ120	-16.02014262744073	Emx-Cre+;DGF/-	Emx-DG-cKO	Emx-DG	CUX1
5	JJ121	-2.440569121059582	Emx-Cre+;DGF/-	Emx-DG-cKO	Emx-DG	CUX1
5	JJ126	-28.31432370967741	Emx-Cre+;DGF/-	Emx-DG-cKO	Emx-DG	CUX1
5	JJ127	119.00995303442399	Emx-Cre+;DGF/-	Emx-DG-cKO	Emx-DG	CUX1
5	JJ128	83.33123157930108	Emx-Cre+;DGF/-	Emx-DG-cKO	Emx-DG	CUX1
5	JJ129	51.55534338227492	Emx-Cre+;DGF/-	Emx-DG-cKO	Emx-DG	CUX1
5	JJ138	7.297745557216369	Emx-Cre+;DGF/+	Emx-DG-Ctrl	Emx-DG	CUX1
5	JJ139	21.65154670574473	Emx-Cre+;DGF/+	Emx-DG-Ctrl	Emx-DG	CUX1
5	JJ140	-4.138828875476918	Emx-Cre+;DGF/+	Emx-DG-Ctrl	Emx-DG	CUX1
5	JJ141	1.259167655994645	Emx-Cre+;DGF/+	Emx-DG-Ctrl	Emx-DG	CUX1
5	JJ158	-29.66343295408446	Emx-Cre+;POMT2F/F	Emx-POMT2-cKO	Emx-POMT2	CUX1
5	JJ159	-22.847861479754823	Emx-Cre+;POMT2F/F	Emx-POMT2-cKO	Emx-POMT2	CUX1
5	JJ160	-14.58665467055772	Emx-Cre+;POMT2F/F	Emx-POMT2-cKO	Emx-POMT2	CUX1
5	JJ161	13.801250166265163	Emx-Cre+;POMT2F/F	Emx-POMT2-cKO	Emx-POMT2	CUX1
5	JJ162	-7.631244628776244	Emx-Cre+;POMT2F/+	Emx-POMT2-Ctrl	Emx-POMT2	CUX1
5	JJ163	-20.958142997219813	Emx-Cre+;POMT2F/+	Emx-POMT2-Ctrl	Emx-POMT2	CUX1
5	JJ164	-24.05538520702017	Emx-Cre+;POMT2F/+	Emx-POMT2-Ctrl	Emx-POMT2	CUX1
5	JJ165	-32.79091221855854	Emx-Cre+;POMT2F/+	Emx-POMT2-Ctrl	Emx-POMT2	CUX1
5	JJ190	23.96169968228556	Emx-Cre+;POMT2F/F	Emx-POMT2-cKO	Emx-POMT2	CUX1
5	JJ191	69.16025302001874	Emx-Cre+;POMT2F/F	Emx-POMT2-cKO	Emx-POMT2	CUX1
5	JJ192	7.394684278018701	Emx-Cre+;POMT2F/F	Emx-POMT2-cKO	Emx-POMT2	CUX1
5	JJ193	24.443490573093356	Emx-Cre+;POMT2F/F	Emx-POMT2-cKO	Emx-POMT2	CUX1
5	JJ198	-8.927414990319543	Emx-Cre+;POMT2F/+	Emx-POMT2-Ctrl	Emx-POMT2	CUX1
5	JJ199	-35.67562470860313	Emx-Cre+;POMT2F/+	Emx-POMT2-Ctrl	Emx-POMT2	CUX1
5	JJ200	-21.647831161455827	Emx-Cre+;POMT2F/+	Emx-POMT2-Ctrl	Emx-POMT2	CUX1
5	JJ201	-25.30509735094311	Emx-Cre+;POMT2F/+	Emx-POMT2-Ctrl	Emx-POMT2	CUX1
5	JJ206	-25.710712678022446	Emx-Cre+;POMT2F/+	Emx-POMT2-Ctrl	Emx-POMT2	CUX1
5	JJ207	-36.17204708443128	Emx-Cre+;POMT2F/+	Emx-POMT2-Ctrl	Emx-POMT2	CUX1
5	JJ208	-20.28259874412849	Emx-Cre+;POMT2F/+	Emx-POMT2-Ctrl	Emx-POMT2	CUX1
5	JJ209	-8.395195068573969	Emx-Cre+;POMT2F/+	Emx-POMT2-Ctrl	Emx-POMT2	CUX1
5	JJ226	-3.2612618126948214	WT	ICD-Ctrl	ICD	CUX1
5	JJ227	13.506913521107398	DGdelta/-	ICD-Mutant	ICD	CUX1
5	JJ228	53.27225825140647	DGdelta/-	ICD-Mutant	ICD	CUX1
5	JJ229	7.902890989218349	DGdelta/-	ICD-Mutant	ICD	CUX1
5	JJ230	-4.25695942279818	DGdelta/-	ICD-Mutant	ICD	CUX1
5	JJ235	-31.39895809686065	WT	ICD-Ctrl	ICD	CUX1
5	JJ236	-29.923333184619803	WT	ICD-Ctrl	ICD	CUX1
5	JJ237	-39.96672909413761	WT	ICD-Ctrl	ICD	CUX1
5	JJ258	-55.81007033602886	FKRPMut	FKRP-Mutant	FKRP	CUX1
5	JJ259	-50.84632930548766	FKRPMut	FKRP-Mutant	FKRP	CUX1
5	JJ260	-70.0917329299517	FKRPMut	FKRP-Mutant	FKRP	CUX1
5	JJ261	-55.1548040687674	FKRPMut	FKRP-Mutant	FKRP	CUX1
5	JJ262	-94.15186022948977	WT	FKRP-Ctrl	FKRP	CUX1
5	JJ263	-95.1210005159432	WT	FKRP-Ctrl	FKRP	CUX1
5	JJ264	-31.46080038561115	WT	FKRP-Ctrl	FKRP	CUX1
5	JJ265	-56.62277591700215	WT	FKRP-Ctrl	FKRP	CUX1
5	JJ266	-75.62406045902851	WT	FKRP-Ctrl	FKRP	CUX1
5	JJ267	-46.723912830942574	WT	FKRP-Ctrl	FKRP	CUX1
5	JJ268	-43.74794515978241	WT	FKRP-Ctrl	FKRP	CUX1
5	JJ269	-61.28515487952594	WT	FKRP-Ctrl	FKRP	CUX1
5	JJ270	-30.1639120079139	FKRPMut	FKRP-Mutant	FKRP	CUX1
5	JJ271	-17.46471256455968	FKRPMut	FKRP-Mutant	FKRP	CUX1
5	JJ272	-2.5746718618670332	FKRPMut	FKRP-Mutant	FKRP	CUX1
5	JJ273	-5.971173075247369	FKRPMut	FKRP-Mutant	FKRP	CUX1
5	JJ274	-43.45248453828793	WT	FKRP-Ctrl	FKRP	CUX1
5	JJ275	13.19013467068559	WT	FKRP-Ctrl	FKRP	CUX1
5	JJ276	-12.041353083553759	WT	FKRP-Ctrl	FKRP	CUX1
5	JJ277	-34.28364918394192	WT	FKRP-Ctrl	FKRP	CUX1
5	JJ306	19.498302144597233	DGdelta/-	ICD-Mutant	ICD	CUX1
5	JJ307	-57.27903307624274	DGdelta/-	ICD-Mutant	ICD	CUX1
5	JJ308	-2.4481271213723326	DGdelta/-	ICD-Mutant	ICD	CUX1
5	JJ309	-18.2006766633729	DGdelta/-	ICD-Mutant	ICD	CUX1
5	JJ314	-13.403017125825727	DGdelta/-	ICD-Mutant	ICD	CUX1
5	JJ315	15.612907139976945	DGdelta/-	ICD-Mutant	ICD	CUX1
5	JJ316	9.040966283461785	DGdelta/-	ICD-Mutant	ICD	CUX1
5	JJ317	18.127027737077736	DGdelta/-	ICD-Mutant	ICD	CUX1
5	JJ322	45.32314255787632	WT	ICD-Ctrl	ICD	CUX1
5	JJ323	13.412754168592338	WT	ICD-Ctrl	ICD	CUX1
5	JJ324	-22.04143846574391	WT	ICD-Ctrl	ICD	CUX1
5	JJ325	-21.78357553917734	WT	ICD-Ctrl	ICD	CUX1
5	JJ330	0.10574534619593123	WT	ICD-Ctrl	ICD	CUX1
5	JJ331	77.20476530749897	WT	ICD-Ctrl	ICD	CUX1
5	JJ332	51.06839071794874	WT	ICD-Ctrl	ICD	CUX1
5	JJ333	-10.828819396785358	WT	ICD-Ctrl	ICD	CUX1
5	JJ346	-2.7821510663764	FKRPMut	FKRP-Mutant	FKRP	CUX1
5	JJ347	-18.301773407010575	FKRPMut	FKRP-Mutant	FKRP	CUX1
5	JJ348	115.74904867640726	FKRPMut	FKRP-Mutant	FKRP	CUX1
5	JJ349	-26.923697085250524	FKRPMut	FKRP-Mutant	FKRP	CUX1
5	JJ350	-9.403973793747241	WT	FKRP-Ctrl	FKRP	CUX1
5	JJ351	8.71310718594907	WT	FKRP-Ctrl	FKRP	CUX1
5	JJ352	-5.886478073148699	WT	FKRP-Ctrl	FKRP	CUX1
5	JJ353	95.77579790750458	WT	FKRP-Ctrl	FKRP	CUX1
5	JJ354	24.67612653249758	Emx-Cre+;DGF/-	Emx-DG-cKO	Emx-DG	CUX1
5	JJ355	-16.80106988396115	Emx-Cre+;DGF/-	Emx-DG-cKO	Emx-DG	CUX1
5	JJ356	88.12109578224037	Emx-Cre+;DGF/-	Emx-DG-cKO	Emx-DG	CUX1
5	JJ357	-26.422995526898188	Emx-Cre+;DGF/-	Emx-DG-cKO	Emx-DG	CUX1
5	JJ362	-36.0330985749913	Emx-Cre+;DGF/+	Emx-DG-Ctrl	Emx-DG	CUX1
5	JJ363	15.564163030044407	Emx-Cre+;DGF/+	Emx-DG-Ctrl	Emx-DG	CUX1
5	JJ364	-16.75736897984018	Emx-Cre+;DGF/+	Emx-DG-Ctrl	Emx-DG	CUX1
5	JJ365	-17.188611007695574	Emx-Cre+;DGF/+	Emx-DG-Ctrl	Emx-DG	CUX1
5	JJ370	-29.850207781526745	Emx-Cre+;DGF/-	Emx-DG-cKO	Emx-DG	CUX1
5	JJ371	165.5890859748748	Emx-Cre+;DGF/-	Emx-DG-cKO	Emx-DG	CUX1
5	JJ372	80.64399562850399	Emx-Cre+;DGF/-	Emx-DG-cKO	Emx-DG	CUX1
5	JJ373	-29.31652627860626	Emx-Cre+;DGF/-	Emx-DG-cKO	Emx-DG	CUX1
5	JJ378	204.4166361528286	Emx-Cre+;DGF/-	Emx-DG-cKO	Emx-DG	CUX1
5	JJ379	56.22063626433735	Emx-Cre+;DGF/-	Emx-DG-cKO	Emx-DG	CUX1
5	JJ380	26.49578847431212	Emx-Cre+;DGF/-	Emx-DG-cKO	Emx-DG	CUX1
5	JJ381	115.05609030168995	Emx-Cre+;DGF/-	Emx-DG-cKO	Emx-DG	CUX1
5	JJ386	75.57666473180079	Emx-Cre+;DGF/+	Emx-DG-Ctrl	Emx-DG	CUX1
5	JJ387	1.7039140468645162	Emx-Cre+;DGF/+	Emx-DG-Ctrl	Emx-DG	CUX1
5	JJ388	20.202106088515563	Emx-Cre+;DGF/+	Emx-DG-Ctrl	Emx-DG	CUX1
5	JJ392	-40.39250044051016	Emx-Cre+;DGF/+	Emx-DG-Ctrl	Emx-DG	CUX1
5	JJ393	-18.190050819156	Emx-Cre+;DGF/+	Emx-DG-Ctrl	Emx-DG	CUX1
5	JJ394	-25.96098705818588	Emx-Cre+;DGF/+	Emx-DG-Ctrl	Emx-DG	CUX1
5	JJ395	-23.694727032627878	Emx-Cre+;DGF/+	Emx-DG-Ctrl	Emx-DG	CUX1
6	JJ001	2.4547674603174605	Emx-Cre+;POMT2F/+	Emx-POMT2-Ctrl	Emx-POMT2	CUX1
6	JJ002	-24.349634623267246	Emx-Cre+;POMT2F/+	Emx-POMT2-Ctrl	Emx-POMT2	CUX1
6	JJ003	-15.52859552801518	Emx-Cre+;POMT2F/+	Emx-POMT2-Ctrl	Emx-POMT2	CUX1
6	JJ004	-26.595519364100955	Emx-Cre+;POMT2F/F	Emx-POMT2-cKO	Emx-POMT2	CUX1
6	JJ005	-4.9778630651341205	Emx-Cre+;POMT2F/F	Emx-POMT2-cKO	Emx-POMT2	CUX1
6	JJ006	-5.24468234445294	Emx-Cre+;POMT2F/F	Emx-POMT2-cKO	Emx-POMT2	CUX1
6	JJ007	-25.382121150331955	Emx-Cre+;POMT2F/+	Emx-POMT2-Ctrl	Emx-POMT2	CUX1
6	JJ008	-17.16026423097975	Emx-Cre+;POMT2F/F	Emx-POMT2-cKO	Emx-POMT2	CUX1
6	JJ053	-25.667964269132522	WT	B4GAT1-Ctrl	B4GAT1	CUX1
6	JJ054	-15.207625110671946	WT	B4GAT1-Ctrl	B4GAT1	CUX1
6	JJ055	12.41780129094055	WT	B4GAT1-Ctrl	B4GAT1	CUX1
6	JJ056	-22.788027987111644	WT	B4GAT1-Ctrl	B4GAT1	CUX1
6	JJ057	-0.6404835257766687	B4GAT1M155T/M155T;Thy1	B4GAT1-Mutant	B4GAT1	CUX1
6	JJ058	1.2083179926578775	B4GAT1M155T/M155T;Thy1	B4GAT1-Mutant	B4GAT1	CUX1
6	JJ059	58.76038740514158	B4GAT1M155T/M155T;Thy1	B4GAT1-Mutant	B4GAT1	CUX1
6	JJ060	19.351132918057107	B4GAT1M155T/M155T;Thy1	B4GAT1-Mutant	B4GAT1	CUX1
6	JJ069	4.686055584384803	B4GAT1M155T/M155T;Thy1	B4GAT1-Mutant	B4GAT1	CUX1
6	JJ070	30.87571312013347	B4GAT1M155T/M155T;Thy1	B4GAT1-Mutant	B4GAT1	CUX1
6	JJ071	13.552455254377227	B4GAT1M155T/M155T	B4GAT1-Mutant	B4GAT1	CUX1
6	JJ072	-47.204574864822426	B4GAT1M155T/M155T	B4GAT1-Mutant	B4GAT1	CUX1
6	JJ073	-12.237728594760332	B4GAT1M155T/M155T	B4GAT1-Mutant	B4GAT1	CUX1
6	JJ074	-9.432882998778988	B4GAT1M155T/M155T	B4GAT1-Mutant	B4GAT1	CUX1
6	JJ075	20.58901636964485	B4GAT1M155T/M155T;Thy1	B4GAT1-Mutant	B4GAT1	CUX1
6	JJ076	-39.93048580953856	B4GAT1M155T/M155T;Thy1	B4GAT1-Mutant	B4GAT1	CUX1
6	JJ086	-53.432647393457124	B4GAT1M155T/M155T	B4GAT1-Mutant	B4GAT1	CUX1
6	JJ087	-69.26223754701437	B4GAT1M155T/M155T	B4GAT1-Mutant	B4GAT1	CUX1
6	JJ088	-63.054616097985296	B4GAT1M155T/M155T	B4GAT1-Mutant	B4GAT1	CUX1
6	JJ089	2.596891796626892	B4GAT1M155T/M155T	B4GAT1-Mutant	B4GAT1	CUX1
6	JJ090	-4.914118429249773	B4GAT1M155T/M155T;Thy1	B4GAT1-Mutant	B4GAT1	CUX1
6	JJ091	-63.532988913260475	B4GAT1M155T/M155T;Thy1	B4GAT1-Mutant	B4GAT1	CUX1
6	JJ092	-27.300916426501356	B4GAT1M155T/M155T;Thy1	B4GAT1-Mutant	B4GAT1	CUX1
6	JJ093	-21.849760321969672	B4GAT1M155T/M155T;Thy1	B4GAT1-Mutant	B4GAT1	CUX1
6	JJ106	-76.66106913682582	WT	B4GAT1-Ctrl	B4GAT1	CUX1
6	JJ107	-83.70592987362504	WT	B4GAT1-Ctrl	B4GAT1	CUX1
6	JJ108	-33.56382281512083	WT	B4GAT1-Ctrl	B4GAT1	CUX1
6	JJ109	-25.969052070481855	WT	B4GAT1-Ctrl	B4GAT1	CUX1
6	JJ114	4.9745128330199195	WT	B4GAT1-Ctrl	B4GAT1	CUX1
6	JJ115	-20.07899129773826	WT	B4GAT1-Ctrl	B4GAT1	CUX1
6	JJ116	2.3883250700955614	WT	B4GAT1-Ctrl	B4GAT1	CUX1
6	JJ117	-75.95436284024561	WT	B4GAT1-Ctrl	B4GAT1	CUX1
6	JJ118	-12.997871478284992	Emx-Cre+;DGF/-	Emx-DG-cKO	Emx-DG	CUX1
6	JJ119	-46.13532530612963	Emx-Cre+;DGF/-	Emx-DG-cKO	Emx-DG	CUX1
6	JJ120	-10.289121277403865	Emx-Cre+;DGF/-	Emx-DG-cKO	Emx-DG	CUX1
6	JJ121	-0.6203199601339406	Emx-Cre+;DGF/-	Emx-DG-cKO	Emx-DG	CUX1
6	JJ126	-31.433887240143367	Emx-Cre+;DGF/-	Emx-DG-cKO	Emx-DG	CUX1
6	JJ127	132.3591505580473	Emx-Cre+;DGF/-	Emx-DG-cKO	Emx-DG	CUX1
6	JJ128	80.3036136316797	Emx-Cre+;DGF/-	Emx-DG-cKO	Emx-DG	CUX1
6	JJ129	8.91042320272635	Emx-Cre+;DGF/-	Emx-DG-cKO	Emx-DG	CUX1
6	JJ138	8.598792426422884	Emx-Cre+;DGF/+	Emx-DG-Ctrl	Emx-DG	CUX1
6	JJ139	15.618916616598503	Emx-Cre+;DGF/+	Emx-DG-Ctrl	Emx-DG	CUX1
6	JJ140	0.7366601301253203	Emx-Cre+;DGF/+	Emx-DG-Ctrl	Emx-DG	CUX1
6	JJ141	-1.4596995461865088	Emx-Cre+;DGF/+	Emx-DG-Ctrl	Emx-DG	CUX1
6	JJ158	-14.533799391275844	Emx-Cre+;POMT2F/F	Emx-POMT2-cKO	Emx-POMT2	CUX1
6	JJ159	-30.942686576601414	Emx-Cre+;POMT2F/F	Emx-POMT2-cKO	Emx-POMT2	CUX1
6	JJ160	-19.8523354309264	Emx-Cre+;POMT2F/F	Emx-POMT2-cKO	Emx-POMT2	CUX1
6	JJ161	30.477133559723598	Emx-Cre+;POMT2F/F	Emx-POMT2-cKO	Emx-POMT2	CUX1
6	JJ162	-6.282956861945365	Emx-Cre+;POMT2F/+	Emx-POMT2-Ctrl	Emx-POMT2	CUX1
6	JJ163	-31.00947034262191	Emx-Cre+;POMT2F/+	Emx-POMT2-Ctrl	Emx-POMT2	CUX1
6	JJ164	-36.332646522061545	Emx-Cre+;POMT2F/+	Emx-POMT2-Ctrl	Emx-POMT2	CUX1
6	JJ165	-18.797857406333303	Emx-Cre+;POMT2F/+	Emx-POMT2-Ctrl	Emx-POMT2	CUX1
6	JJ190	27.342259039182427	Emx-Cre+;POMT2F/F	Emx-POMT2-cKO	Emx-POMT2	CUX1
6	JJ191	25.094430856854824	Emx-Cre+;POMT2F/F	Emx-POMT2-cKO	Emx-POMT2	CUX1
6	JJ192	33.99174349634401	Emx-Cre+;POMT2F/F	Emx-POMT2-cKO	Emx-POMT2	CUX1
6	JJ193	9.211088679153969	Emx-Cre+;POMT2F/F	Emx-POMT2-cKO	Emx-POMT2	CUX1
6	JJ198	-32.19484242621695	Emx-Cre+;POMT2F/+	Emx-POMT2-Ctrl	Emx-POMT2	CUX1
6	JJ199	-36.55310194895537	Emx-Cre+;POMT2F/+	Emx-POMT2-Ctrl	Emx-POMT2	CUX1
6	JJ200	-21.15303571492704	Emx-Cre+;POMT2F/+	Emx-POMT2-Ctrl	Emx-POMT2	CUX1
6	JJ201	-20.19853775766283	Emx-Cre+;POMT2F/+	Emx-POMT2-Ctrl	Emx-POMT2	CUX1
6	JJ206	-22.442003442813217	Emx-Cre+;POMT2F/+	Emx-POMT2-Ctrl	Emx-POMT2	CUX1
6	JJ207	-23.818703576996693	Emx-Cre+;POMT2F/+	Emx-POMT2-Ctrl	Emx-POMT2	CUX1
6	JJ208	-25.386064371834113	Emx-Cre+;POMT2F/+	Emx-POMT2-Ctrl	Emx-POMT2	CUX1
6	JJ209	-8.762756596321859	Emx-Cre+;POMT2F/+	Emx-POMT2-Ctrl	Emx-POMT2	CUX1
6	JJ226	7.0848916671128945	WT	ICD-Ctrl	ICD	CUX1
6	JJ227	2.318412003467946	DGdelta/-	ICD-Mutant	ICD	CUX1
6	JJ228	-4.056769266235051	DGdelta/-	ICD-Mutant	ICD	CUX1
6	JJ229	1.0090580052432945	DGdelta/-	ICD-Mutant	ICD	CUX1
6	JJ230	5.35726370906995	DGdelta/-	ICD-Mutant	ICD	CUX1
6	JJ235	-24.95906591121104	WT	ICD-Ctrl	ICD	CUX1
6	JJ236	-44.01644148723119	WT	ICD-Ctrl	ICD	CUX1
6	JJ237	-33.954616551156995	WT	ICD-Ctrl	ICD	CUX1
6	JJ258	-53.233810203665435	FKRPMut	FKRP-Mutant	FKRP	CUX1
6	JJ259	-40.17732601994404	FKRPMut	FKRP-Mutant	FKRP	CUX1
6	JJ260	-58.92389517632851	FKRPMut	FKRP-Mutant	FKRP	CUX1
6	JJ261	-29.356140439723326	FKRPMut	FKRP-Mutant	FKRP	CUX1
6	JJ262	-64.11726859987418	WT	FKRP-Ctrl	FKRP	CUX1
6	JJ263	-66.97000310530785	WT	FKRP-Ctrl	FKRP	CUX1
6	JJ264	-21.54385700447271	WT	FKRP-Ctrl	FKRP	CUX1
6	JJ265	-47.890456039633136	WT	FKRP-Ctrl	FKRP	CUX1
6	JJ266	-62.967082410998955	WT	FKRP-Ctrl	FKRP	CUX1
6	JJ267	-47.12432976951627	WT	FKRP-Ctrl	FKRP	CUX1
6	JJ268	-18.701007934347835	WT	FKRP-Ctrl	FKRP	CUX1
6	JJ269	-43.771968727776816	WT	FKRP-Ctrl	FKRP	CUX1
6	JJ270	-24.97578867458055	FKRPMut	FKRP-Mutant	FKRP	CUX1
6	JJ271	-15.329747877197203	FKRPMut	FKRP-Mutant	FKRP	CUX1
6	JJ272	10.674411181030198	FKRPMut	FKRP-Mutant	FKRP	CUX1
6	JJ273	-1.8945883280164633	FKRPMut	FKRP-Mutant	FKRP	CUX1
6	JJ274	-52.302974343832695	WT	FKRP-Ctrl	FKRP	CUX1
6	JJ275	-32.23210295917247	WT	FKRP-Ctrl	FKRP	CUX1
6	JJ276	-28.505270363095217	WT	FKRP-Ctrl	FKRP	CUX1
6	JJ277	-19.693509010232145	WT	FKRP-Ctrl	FKRP	CUX1
6	JJ306	-9.57041252068916	DGdelta/-	ICD-Mutant	ICD	CUX1
6	JJ307	-34.65615127249092	DGdelta/-	ICD-Mutant	ICD	CUX1
6	JJ308	2.285735014948159	DGdelta/-	ICD-Mutant	ICD	CUX1
6	JJ309	-16.837141767310793	DGdelta/-	ICD-Mutant	ICD	CUX1
6	JJ314	-27.240554973942533	DGdelta/-	ICD-Mutant	ICD	CUX1
6	JJ315	6.028647352474006	DGdelta/-	ICD-Mutant	ICD	CUX1
6	JJ316	23.621820207086028	DGdelta/-	ICD-Mutant	ICD	CUX1
6	JJ317	41.10710220930438	DGdelta/-	ICD-Mutant	ICD	CUX1
6	JJ322	25.666302307331687	WT	ICD-Ctrl	ICD	CUX1
6	JJ323	-9.470473784424675	WT	ICD-Ctrl	ICD	CUX1
6	JJ324	-14.489058978040703	WT	ICD-Ctrl	ICD	CUX1
6	JJ325	-34.91034021140164	WT	ICD-Ctrl	ICD	CUX1
6	JJ330	-26.580105091680366	WT	ICD-Ctrl	ICD	CUX1
6	JJ331	77.33155937278961	WT	ICD-Ctrl	ICD	CUX1
6	JJ332	42.19563175243146	WT	ICD-Ctrl	ICD	CUX1
6	JJ333	-16.81628247999841	WT	ICD-Ctrl	ICD	CUX1
6	JJ346	104.92161387077988	FKRPMut	FKRP-Mutant	FKRP	CUX1
6	JJ347	46.70563771565772	FKRPMut	FKRP-Mutant	FKRP	CUX1
6	JJ348	135.40347420204648	FKRPMut	FKRP-Mutant	FKRP	CUX1
6	JJ349	-40.578927126634234	FKRPMut	FKRP-Mutant	FKRP	CUX1
6	JJ350	-16.276241941895325	WT	FKRP-Ctrl	FKRP	CUX1
6	JJ351	-11.762429724096137	WT	FKRP-Ctrl	FKRP	CUX1
6	JJ352	4.182204699674306	WT	FKRP-Ctrl	FKRP	CUX1
6	JJ353	6.308759780734628	WT	FKRP-Ctrl	FKRP	CUX1
6	JJ354	69.42882066850048	Emx-Cre+;DGF/-	Emx-DG-cKO	Emx-DG	CUX1
6	JJ355	-15.294819145452303	Emx-Cre+;DGF/-	Emx-DG-cKO	Emx-DG	CUX1
6	JJ356	161.50243811477037	Emx-Cre+;DGF/-	Emx-DG-cKO	Emx-DG	CUX1
6	JJ357	-18.934911397519993	Emx-Cre+;DGF/-	Emx-DG-cKO	Emx-DG	CUX1
6	JJ362	-18.641188237900263	Emx-Cre+;DGF/+	Emx-DG-Ctrl	Emx-DG	CUX1
6	JJ363	-29.57464305761793	Emx-Cre+;DGF/+	Emx-DG-Ctrl	Emx-DG	CUX1
6	JJ364	-10.84288272214989	Emx-Cre+;DGF/+	Emx-DG-Ctrl	Emx-DG	CUX1
6	JJ365	-9.754790122867348	Emx-Cre+;DGF/+	Emx-DG-Ctrl	Emx-DG	CUX1
6	JJ370	-17.720000673683597	Emx-Cre+;DGF/-	Emx-DG-cKO	Emx-DG	CUX1
6	JJ371	232.35567449028093	Emx-Cre+;DGF/-	Emx-DG-cKO	Emx-DG	CUX1
6	JJ372	141.07464625678924	Emx-Cre+;DGF/-	Emx-DG-cKO	Emx-DG	CUX1
6	JJ373	-18.864726936620116	Emx-Cre+;DGF/-	Emx-DG-cKO	Emx-DG	CUX1
6	JJ378	277.49005766280015	Emx-Cre+;DGF/-	Emx-DG-cKO	Emx-DG	CUX1
6	JJ379	85.08007000489611	Emx-Cre+;DGF/-	Emx-DG-cKO	Emx-DG	CUX1
6	JJ380	85.28011935599436	Emx-Cre+;DGF/-	Emx-DG-cKO	Emx-DG	CUX1
6	JJ381	79.9146453296792	Emx-Cre+;DGF/-	Emx-DG-cKO	Emx-DG	CUX1
6	JJ386	126.56052105363987	Emx-Cre+;DGF/+	Emx-DG-Ctrl	Emx-DG	CUX1
6	JJ387	9.613419347301203	Emx-Cre+;DGF/+	Emx-DG-Ctrl	Emx-DG	CUX1
6	JJ388	36.097114046075205	Emx-Cre+;DGF/+	Emx-DG-Ctrl	Emx-DG	CUX1
6	JJ392	-41.37034181413651	Emx-Cre+;DGF/+	Emx-DG-Ctrl	Emx-DG	CUX1
6	JJ393	-32.889942293945296	Emx-Cre+;DGF/+	Emx-DG-Ctrl	Emx-DG	CUX1
6	JJ394	-32.150920531092254	Emx-Cre+;DGF/+	Emx-DG-Ctrl	Emx-DG	CUX1
6	JJ395	-23.297763929692167	Emx-Cre+;DGF/+	Emx-DG-Ctrl	Emx-DG	CUX1
7	JJ001	0.2250465696649068	Emx-Cre+;POMT2F/+	Emx-POMT2-Ctrl	Emx-POMT2	CUX1
7	JJ002	-16.670288836807305	Emx-Cre+;POMT2F/+	Emx-POMT2-Ctrl	Emx-POMT2	CUX1
7	JJ003	-15.873812394112045	Emx-Cre+;POMT2F/+	Emx-POMT2-Ctrl	Emx-POMT2	CUX1
7	JJ004	-26.45361095569253	Emx-Cre+;POMT2F/F	Emx-POMT2-cKO	Emx-POMT2	CUX1
7	JJ005	-10.106633180076642	Emx-Cre+;POMT2F/F	Emx-POMT2-cKO	Emx-POMT2	CUX1
7	JJ006	-5.235408946608932	Emx-Cre+;POMT2F/F	Emx-POMT2-cKO	Emx-POMT2	CUX1
7	JJ007	-22.080007316388123	Emx-Cre+;POMT2F/+	Emx-POMT2-Ctrl	Emx-POMT2	CUX1
7	JJ008	5.25829729976283	Emx-Cre+;POMT2F/F	Emx-POMT2-cKO	Emx-POMT2	CUX1
7	JJ053	-15.890803115122614	WT	B4GAT1-Ctrl	B4GAT1	CUX1
7	JJ054	-15.83757550749732	WT	B4GAT1-Ctrl	B4GAT1	CUX1
7	JJ055	33.3075283951304	WT	B4GAT1-Ctrl	B4GAT1	CUX1
7	JJ056	-13.787818144485167	WT	B4GAT1-Ctrl	B4GAT1	CUX1
7	JJ057	-7.793680895197402	B4GAT1M155T/M155T;Thy1	B4GAT1-Mutant	B4GAT1	CUX1
7	JJ058	3.336468744621982	B4GAT1M155T/M155T;Thy1	B4GAT1-Mutant	B4GAT1	CUX1
7	JJ059	36.868728994561856	B4GAT1M155T/M155T;Thy1	B4GAT1-Mutant	B4GAT1	CUX1
7	JJ060	17.454845092077637	B4GAT1M155T/M155T;Thy1	B4GAT1-Mutant	B4GAT1	CUX1
7	JJ069	-10.333085950006762	B4GAT1M155T/M155T;Thy1	B4GAT1-Mutant	B4GAT1	CUX1
7	JJ070	60.527743232074386	B4GAT1M155T/M155T;Thy1	B4GAT1-Mutant	B4GAT1	CUX1
7	JJ071	55.44493228097383	B4GAT1M155T/M155T	B4GAT1-Mutant	B4GAT1	CUX1
7	JJ072	-29.448315045221687	B4GAT1M155T/M155T	B4GAT1-Mutant	B4GAT1	CUX1
7	JJ073	-4.6718513483835595	B4GAT1M155T/M155T	B4GAT1-Mutant	B4GAT1	CUX1
7	JJ074	-6.072775991588666	B4GAT1M155T/M155T	B4GAT1-Mutant	B4GAT1	CUX1
7	JJ075	13.251327520571218	B4GAT1M155T/M155T;Thy1	B4GAT1-Mutant	B4GAT1	CUX1
7	JJ076	-14.922097010868052	B4GAT1M155T/M155T;Thy1	B4GAT1-Mutant	B4GAT1	CUX1
7	JJ086	-40.815544684939596	B4GAT1M155T/M155T	B4GAT1-Mutant	B4GAT1	CUX1
7	JJ087	-69.44367457768912	B4GAT1M155T/M155T	B4GAT1-Mutant	B4GAT1	CUX1
7	JJ088	-46.49317747161168	B4GAT1M155T/M155T	B4GAT1-Mutant	B4GAT1	CUX1
7	JJ089	14.930983676968784	B4GAT1M155T/M155T	B4GAT1-Mutant	B4GAT1	CUX1
7	JJ090	-9.8403257606837915	B4GAT1M155T/M155T;Thy1	B4GAT1-Mutant	B4GAT1	CUX1
7	JJ091	-43.28439723970109	B4GAT1M155T/M155T;Thy1	B4GAT1-Mutant	B4GAT1	CUX1
7	JJ092	-15.441195073248347	B4GAT1M155T/M155T;Thy1	B4GAT1-Mutant	B4GAT1	CUX1
7	JJ093	14.75360615530307	B4GAT1M155T/M155T;Thy1	B4GAT1-Mutant	B4GAT1	CUX1
7	JJ106	-53.68881425455186	WT	B4GAT1-Ctrl	B4GAT1	CUX1
7	JJ107	-50.45634997002844	WT	B4GAT1-Ctrl	B4GAT1	CUX1
7	JJ108	-31.027370889308674	WT	B4GAT1-Ctrl	B4GAT1	CUX1
7	JJ109	-19.29395367542016	WT	B4GAT1-Ctrl	B4GAT1	CUX1
7	JJ114	-4.452813155843349	WT	B4GAT1-Ctrl	B4GAT1	CUX1
7	JJ115	-3.264304324558225	WT	B4GAT1-Ctrl	B4GAT1	CUX1
7	JJ116	6.487340012624297	WT	B4GAT1-Ctrl	B4GAT1	CUX1
7	JJ117	-54.748640646862064	WT	B4GAT1-Ctrl	B4GAT1	CUX1
7	JJ118	-13.327314283695443	Emx-Cre+;DGF/-	Emx-DG-cKO	Emx-DG	CUX1
7	JJ119	-3.5693971058294665	Emx-Cre+;DGF/-	Emx-DG-cKO	Emx-DG	CUX1
7	JJ120	-17.30067396106091	Emx-Cre+;DGF/-	Emx-DG-cKO	Emx-DG	CUX1
7	JJ121	-3.7438551851985835	Emx-Cre+;DGF/-	Emx-DG-cKO	Emx-DG	CUX1
7	JJ126	63.987647885304646	Emx-Cre+;DGF/-	Emx-DG-cKO	Emx-DG	CUX1
7	JJ127	156.55034899401997	Emx-Cre+;DGF/-	Emx-DG-cKO	Emx-DG	CUX1
7	JJ128	94.90300677684102	Emx-Cre+;DGF/-	Emx-DG-cKO	Emx-DG	CUX1
7	JJ129	9.070744927973825	Emx-Cre+;DGF/-	Emx-DG-cKO	Emx-DG	CUX1
7	JJ138	5.785586529438585	Emx-Cre+;DGF/+	Emx-DG-Ctrl	Emx-DG	CUX1
7	JJ139	20.937824223129763	Emx-Cre+;DGF/+	Emx-DG-Ctrl	Emx-DG	CUX1
7	JJ140	-2.780876813272736	Emx-Cre+;DGF/+	Emx-DG-Ctrl	Emx-DG	CUX1
7	JJ141	-6.150727973090322	Emx-Cre+;DGF/+	Emx-DG-Ctrl	Emx-DG	CUX1
7	JJ158	-6.4204859628741815	Emx-Cre+;POMT2F/F	Emx-POMT2-cKO	Emx-POMT2	CUX1
7	JJ159	-8.29570867029823	Emx-Cre+;POMT2F/F	Emx-POMT2-cKO	Emx-POMT2	CUX1
7	JJ160	-19.74351251369499	Emx-Cre+;POMT2F/F	Emx-POMT2-cKO	Emx-POMT2	CUX1
7	JJ161	52.86383847795347	Emx-Cre+;POMT2F/F	Emx-POMT2-cKO	Emx-POMT2	CUX1
7	JJ162	-4.551600895880786	Emx-Cre+;POMT2F/+	Emx-POMT2-Ctrl	Emx-POMT2	CUX1
7	JJ163	-32.88568626466798	Emx-Cre+;POMT2F/+	Emx-POMT2-Ctrl	Emx-POMT2	CUX1
7	JJ164	-15.737966964528502	Emx-Cre+;POMT2F/+	Emx-POMT2-Ctrl	Emx-POMT2	CUX1
7	JJ165	-19.76609350464359	Emx-Cre+;POMT2F/+	Emx-POMT2-Ctrl	Emx-POMT2	CUX1
7	JJ190	23.893567560763113	Emx-Cre+;POMT2F/F	Emx-POMT2-cKO	Emx-POMT2	CUX1
7	JJ191	27.444372397258878	Emx-Cre+;POMT2F/F	Emx-POMT2-cKO	Emx-POMT2	CUX1
7	JJ192	45.2330076725892	Emx-Cre+;POMT2F/F	Emx-POMT2-cKO	Emx-POMT2	CUX1
7	JJ193	10.249973401376167	Emx-Cre+;POMT2F/F	Emx-POMT2-cKO	Emx-POMT2	CUX1
7	JJ198	-36.15453597797384	Emx-Cre+;POMT2F/+	Emx-POMT2-Ctrl	Emx-POMT2	CUX1
7	JJ199	-27.50508823273333	Emx-Cre+;POMT2F/+	Emx-POMT2-Ctrl	Emx-POMT2	CUX1
7	JJ200	-14.324620044733043	Emx-Cre+;POMT2F/+	Emx-POMT2-Ctrl	Emx-POMT2	CUX1
7	JJ201	-23.259747274314766	Emx-Cre+;POMT2F/+	Emx-POMT2-Ctrl	Emx-POMT2	CUX1
7	JJ206	-20.28921233295688	Emx-Cre+;POMT2F/+	Emx-POMT2-Ctrl	Emx-POMT2	CUX1
7	JJ207	-14.581627819420893	Emx-Cre+;POMT2F/+	Emx-POMT2-Ctrl	Emx-POMT2	CUX1
7	JJ208	-13.177967625802372	Emx-Cre+;POMT2F/+	Emx-POMT2-Ctrl	Emx-POMT2	CUX1
7	JJ209	-12.65118215122311	Emx-Cre+;POMT2F/+	Emx-POMT2-Ctrl	Emx-POMT2	CUX1
7	JJ226	6.364615257698536	WT	ICD-Ctrl	ICD	CUX1
7	JJ227	-9.918386262442406	DGdelta/-	ICD-Mutant	ICD	CUX1
7	JJ228	-13.647993901249151	DGdelta/-	ICD-Mutant	ICD	CUX1
7	JJ229	4.880602956958228	DGdelta/-	ICD-Mutant	ICD	CUX1
7	JJ230	-18.33120649239523	DGdelta/-	ICD-Mutant	ICD	CUX1
7	JJ235	-23.711961418003096	WT	ICD-Ctrl	ICD	CUX1
7	JJ236	-36.30278901795316	WT	ICD-Ctrl	ICD	CUX1
7	JJ237	-28.114590436730207	WT	ICD-Ctrl	ICD	CUX1
7	JJ258	-35.26817153842305	FKRPMut	FKRP-Mutant	FKRP	CUX1
7	JJ259	-21.38593516719613	FKRPMut	FKRP-Mutant	FKRP	CUX1
7	JJ260	-47.94819421819645	FKRPMut	FKRP-Mutant	FKRP	CUX1
7	JJ261	-26.38995322335677	FKRPMut	FKRP-Mutant	FKRP	CUX1
7	JJ262	-21.71179184684858	WT	FKRP-Ctrl	FKRP	CUX1
7	JJ263	-56.290819197261875	WT	FKRP-Ctrl	FKRP	CUX1
7	JJ264	-15.916481440826272	WT	FKRP-Ctrl	FKRP	CUX1
7	JJ265	-42.479537589242945	WT	FKRP-Ctrl	FKRP	CUX1
7	JJ266	-28.779481813414854	WT	FKRP-Ctrl	FKRP	CUX1
7	JJ267	-32.54513044310422	WT	FKRP-Ctrl	FKRP	CUX1
7	JJ268	-30.259403281405362	WT	FKRP-Ctrl	FKRP	CUX1
7	JJ269	-42.98961775761578	WT	FKRP-Ctrl	FKRP	CUX1
7	JJ270	-17.04575578759102	FKRPMut	FKRP-Mutant	FKRP	CUX1
7	JJ271	1.1993807473637617	FKRPMut	FKRP-Mutant	FKRP	CUX1
7	JJ272	18.71147274062144	FKRPMut	FKRP-Mutant	FKRP	CUX1
7	JJ273	-15.023867745725182	FKRPMut	FKRP-Mutant	FKRP	CUX1
7	JJ274	-17.490312530021622	WT	FKRP-Ctrl	FKRP	CUX1
7	JJ275	12.181796380183831	WT	FKRP-Ctrl	FKRP	CUX1
7	JJ276	-3.5746040491622466	WT	FKRP-Ctrl	FKRP	CUX1
7	JJ277	-18.029063540771876	WT	FKRP-Ctrl	FKRP	CUX1
7	JJ306	-12.543277739555114	DGdelta/-	ICD-Mutant	ICD	CUX1
7	JJ307	-16.628169843919522	DGdelta/-	ICD-Mutant	ICD	CUX1
7	JJ308	29.478047121051947	DGdelta/-	ICD-Mutant	ICD	CUX1
7	JJ309	-7.549078166325103	DGdelta/-	ICD-Mutant	ICD	CUX1
7	JJ314	-16.534271230071074	DGdelta/-	ICD-Mutant	ICD	CUX1
7	JJ315	63.90888536545515	DGdelta/-	ICD-Mutant	ICD	CUX1
7	JJ316	6.92656036160588	DGdelta/-	ICD-Mutant	ICD	CUX1
7	JJ317	-15.7862970846384	DGdelta/-	ICD-Mutant	ICD	CUX1
7	JJ322	66.00071570602445	WT	ICD-Ctrl	ICD	CUX1
7	JJ323	-44.6006570950741	WT	ICD-Ctrl	ICD	CUX1
7	JJ324	-25.694505094929394	WT	ICD-Ctrl	ICD	CUX1
7	JJ325	-26.63553253677742	WT	ICD-Ctrl	ICD	CUX1
7	JJ330	-16.907761837712087	WT	ICD-Ctrl	ICD	CUX1
7	JJ331	111.36735554318925	WT	ICD-Ctrl	ICD	CUX1
7	JJ332	13.750057543345596	WT	ICD-Ctrl	ICD	CUX1
7	JJ333	-22.291771984254222	WT	ICD-Ctrl	ICD	CUX1
7	JJ346	34.399760688857064	FKRPMut	FKRP-Mutant	FKRP	CUX1
7	JJ347	63.86594062807709	FKRPMut	FKRP-Mutant	FKRP	CUX1
7	JJ348	200.25318726782123	FKRPMut	FKRP-Mutant	FKRP	CUX1
7	JJ349	-34.01957469073678	FKRPMut	FKRP-Mutant	FKRP	CUX1
7	JJ350	-31.71170860856201	WT	FKRP-Ctrl	FKRP	CUX1
7	JJ351	28.01960604618705	WT	FKRP-Ctrl	FKRP	CUX1
7	JJ352	-2.1645233722939943	WT	FKRP-Ctrl	FKRP	CUX1
7	JJ353	71.4983596474679	WT	FKRP-Ctrl	FKRP	CUX1
7	JJ354	109.66510822581968	Emx-Cre+;DGF/-	Emx-DG-cKO	Emx-DG	CUX1
7	JJ355	-5.546794567879374	Emx-Cre+;DGF/-	Emx-DG-cKO	Emx-DG	CUX1
7	JJ356	152.99790969507566	Emx-Cre+;DGF/-	Emx-DG-cKO	Emx-DG	CUX1
7	JJ357	12.968510189127718	Emx-Cre+;DGF/-	Emx-DG-cKO	Emx-DG	CUX1
7	JJ362	-44.462658409066194	Emx-Cre+;DGF/+	Emx-DG-Ctrl	Emx-DG	CUX1
7	JJ363	-32.31585641349496	Emx-Cre+;DGF/+	Emx-DG-Ctrl	Emx-DG	CUX1
7	JJ364	1.1736752984124148	Emx-Cre+;DGF/+	Emx-DG-Ctrl	Emx-DG	CUX1
7	JJ365	-12.568303598323345	Emx-Cre+;DGF/+	Emx-DG-Ctrl	Emx-DG	CUX1
7	JJ370	39.45623644646749	Emx-Cre+;DGF/-	Emx-DG-cKO	Emx-DG	CUX1
7	JJ371	186.56911370596723	Emx-Cre+;DGF/-	Emx-DG-cKO	Emx-DG	CUX1
7	JJ372	181.0971600050444	Emx-Cre+;DGF/-	Emx-DG-cKO	Emx-DG	CUX1
7	JJ373	111.32527222033605	Emx-Cre+;DGF/-	Emx-DG-cKO	Emx-DG	CUX1
7	JJ378	162.89964762481347	Emx-Cre+;DGF/-	Emx-DG-cKO	Emx-DG	CUX1
7	JJ379	125.07922610036245	Emx-Cre+;DGF/-	Emx-DG-cKO	Emx-DG	CUX1
7	JJ380	86.93193266842945	Emx-Cre+;DGF/-	Emx-DG-cKO	Emx-DG	CUX1
7	JJ381	84.46539116997873	Emx-Cre+;DGF/-	Emx-DG-cKO	Emx-DG	CUX1
7	JJ386	84.96645860153255	Emx-Cre+;DGF/+	Emx-DG-Ctrl	Emx-DG	CUX1
7	JJ387	6.515257370389217	Emx-Cre+;DGF/+	Emx-DG-Ctrl	Emx-DG	CUX1
7	JJ388	15.808685546222591	Emx-Cre+;DGF/+	Emx-DG-Ctrl	Emx-DG	CUX1
7	JJ392	-28.080953444173172	Emx-Cre+;DGF/+	Emx-DG-Ctrl	Emx-DG	CUX1
7	JJ393	-23.77182518078473	Emx-Cre+;DGF/+	Emx-DG-Ctrl	Emx-DG	CUX1
7	JJ394	8.868633344113013	Emx-Cre+;DGF/+	Emx-DG-Ctrl	Emx-DG	CUX1
7	JJ395	-18.028670529469196	Emx-Cre+;DGF/+	Emx-DG-Ctrl	Emx-DG	CUX1
8	JJ001	-0.7652960846560859	Emx-Cre+;POMT2F/+	Emx-POMT2-Ctrl	Emx-POMT2	CUX1
8	JJ002	-18.224729244225994	Emx-Cre+;POMT2F/+	Emx-POMT2-Ctrl	Emx-POMT2	CUX1
8	JJ003	-12.679699991452992	Emx-Cre+;POMT2F/+	Emx-POMT2-Ctrl	Emx-POMT2	CUX1
8	JJ004	-22.970753598335193	Emx-Cre+;POMT2F/F	Emx-POMT2-cKO	Emx-POMT2	CUX1
8	JJ005	-12.317719770114934	Emx-Cre+;POMT2F/F	Emx-POMT2-cKO	Emx-POMT2	CUX1
8	JJ006	10.757661590696898	Emx-Cre+;POMT2F/F	Emx-POMT2-cKO	Emx-POMT2	CUX1
8	JJ007	-18.326678537389324	Emx-Cre+;POMT2F/+	Emx-POMT2-Ctrl	Emx-POMT2	CUX1
8	JJ008	16.702056817490718	Emx-Cre+;POMT2F/F	Emx-POMT2-cKO	Emx-POMT2	CUX1
8	JJ053	-6.424449464960522	WT	B4GAT1-Ctrl	B4GAT1	CUX1
8	JJ054	7.383342421795571	WT	B4GAT1-Ctrl	B4GAT1	CUX1
8	JJ055	72.33993922197503	WT	B4GAT1-Ctrl	B4GAT1	CUX1
8	JJ056	-7.416805798806156	WT	B4GAT1-Ctrl	B4GAT1	CUX1
8	JJ057	-8.800198763871927	B4GAT1M155T/M155T;Thy1	B4GAT1-Mutant	B4GAT1	CUX1
8	JJ058	6.423814713489397	B4GAT1M155T/M155T;Thy1	B4GAT1-Mutant	B4GAT1	CUX1
8	JJ059	27.402356222345816	B4GAT1M155T/M155T;Thy1	B4GAT1-Mutant	B4GAT1	CUX1
8	JJ060	16.179991192683246	B4GAT1M155T/M155T;Thy1	B4GAT1-Mutant	B4GAT1	CUX1
8	JJ069	-0.6085634632342286	B4GAT1M155T/M155T;Thy1	B4GAT1-Mutant	B4GAT1	CUX1
8	JJ070	88.3229507033388	B4GAT1M155T/M155T;Thy1	B4GAT1-Mutant	B4GAT1	CUX1
8	JJ071	23.10216484189118	B4GAT1M155T/M155T	B4GAT1-Mutant	B4GAT1	CUX1
8	JJ072	-38.99085112525275	B4GAT1M155T/M155T	B4GAT1-Mutant	B4GAT1	CUX1
8	JJ073	-1.0207108169825763	B4GAT1M155T/M155T	B4GAT1-Mutant	B4GAT1	CUX1
8	JJ074	0.4366724211097335	B4GAT1M155T/M155T	B4GAT1-Mutant	B4GAT1	CUX1
8	JJ075	-3.4677941686574436	B4GAT1M155T/M155T;Thy1	B4GAT1-Mutant	B4GAT1	CUX1
8	JJ076	-7.713603343705927	B4GAT1M155T/M155T;Thy1	B4GAT1-Mutant	B4GAT1	CUX1
8	JJ086	-21.21274535249044	B4GAT1M155T/M155T	B4GAT1-Mutant	B4GAT1	CUX1
8	JJ087	-24.771532102448266	B4GAT1M155T/M155T	B4GAT1-Mutant	B4GAT1	CUX1
8	JJ088	-42.82106833241759	B4GAT1M155T/M155T	B4GAT1-Mutant	B4GAT1	CUX1
8	JJ089	-8.262458325473252	B4GAT1M155T/M155T	B4GAT1-Mutant	B4GAT1	CUX1
8	JJ090	-56.18464589363725	B4GAT1M155T/M155T;Thy1	B4GAT1-Mutant	B4GAT1	CUX1
8	JJ091	-48.11271507200812	B4GAT1M155T/M155T;Thy1	B4GAT1-Mutant	B4GAT1	CUX1
8	JJ092	-41.02525931545574	B4GAT1M155T/M155T;Thy1	B4GAT1-Mutant	B4GAT1	CUX1
8	JJ093	-16.382701609848443	B4GAT1M155T/M155T;Thy1	B4GAT1-Mutant	B4GAT1	CUX1
8	JJ106	-41.072840359277315	WT	B4GAT1-Ctrl	B4GAT1	CUX1
8	JJ107	-44.72429202910644	WT	B4GAT1-Ctrl	B4GAT1	CUX1
8	JJ108	-0.9476359176666543	WT	B4GAT1-Ctrl	B4GAT1	CUX1
8	JJ109	-6.688721960444279	WT	B4GAT1-Ctrl	B4GAT1	CUX1
8	JJ114	6.887166586860151	WT	B4GAT1-Ctrl	B4GAT1	CUX1
8	JJ115	-3.3832027672722993	WT	B4GAT1-Ctrl	B4GAT1	CUX1
8	JJ116	-5.693317458640081	WT	B4GAT1-Ctrl	B4GAT1	CUX1
8	JJ117	-17.866106863096814	WT	B4GAT1-Ctrl	B4GAT1	CUX1
8	JJ118	19.23089215257276	Emx-Cre+;DGF/-	Emx-DG-cKO	Emx-DG	CUX1
8	JJ119	30.540493230769545	Emx-Cre+;DGF/-	Emx-DG-cKO	Emx-DG	CUX1
8	JJ120	-3.5386658810211693	Emx-Cre+;DGF/-	Emx-DG-cKO	Emx-DG	CUX1
8	JJ121	11.947665942881372	Emx-Cre+;DGF/-	Emx-DG-cKO	Emx-DG	CUX1
8	JJ126	78.88090093189965	Emx-Cre+;DGF/-	Emx-DG-cKO	Emx-DG	CUX1
8	JJ127	230.2845653511395	Emx-Cre+;DGF/-	Emx-DG-cKO	Emx-DG	CUX1
8	JJ128	76.73898003156567	Emx-Cre+;DGF/-	Emx-DG-cKO	Emx-DG	CUX1
8	JJ129	24.091915539891108	Emx-Cre+;DGF/-	Emx-DG-cKO	Emx-DG	CUX1
8	JJ138	3.2930088692156687	Emx-Cre+;DGF/+	Emx-DG-Ctrl	Emx-DG	CUX1
8	JJ139	6.427365564305528	Emx-Cre+;DGF/+	Emx-DG-Ctrl	Emx-DG	CUX1
8	JJ140	-5.969440861938172	Emx-Cre+;DGF/+	Emx-DG-Ctrl	Emx-DG	CUX1
8	JJ141	4.313775160663188	Emx-Cre+;DGF/+	Emx-DG-Ctrl	Emx-DG	CUX1
8	JJ158	-3.9242443704796415	Emx-Cre+;POMT2F/F	Emx-POMT2-cKO	Emx-POMT2	CUX1
8	JJ159	9.268674453049925	Emx-Cre+;POMT2F/F	Emx-POMT2-cKO	Emx-POMT2	CUX1
8	JJ160	-5.278440292225771	Emx-Cre+;POMT2F/F	Emx-POMT2-cKO	Emx-POMT2	CUX1
8	JJ161	48.146726068141106	Emx-Cre+;POMT2F/F	Emx-POMT2-cKO	Emx-POMT2	CUX1
8	JJ162	20.005316318131236	Emx-Cre+;POMT2F/+	Emx-POMT2-Ctrl	Emx-POMT2	CUX1
8	JJ163	-35.98524533314863	Emx-Cre+;POMT2F/+	Emx-POMT2-Ctrl	Emx-POMT2	CUX1
8	JJ164	-0.48908075763195785	Emx-Cre+;POMT2F/+	Emx-POMT2-Ctrl	Emx-POMT2	CUX1
8	JJ165	-4.052504927388459	Emx-Cre+;POMT2F/+	Emx-POMT2-Ctrl	Emx-POMT2	CUX1
8	JJ190	52.8514582513673	Emx-Cre+;POMT2F/F	Emx-POMT2-cKO	Emx-POMT2	CUX1
8	JJ191	94.87049777604675	Emx-Cre+;POMT2F/F	Emx-POMT2-cKO	Emx-POMT2	CUX1
8	JJ192	80.86964311016142	Emx-Cre+;POMT2F/F	Emx-POMT2-cKO	Emx-POMT2	CUX1
8	JJ193	42.22407069415692	Emx-Cre+;POMT2F/F	Emx-POMT2-cKO	Emx-POMT2	CUX1
8	JJ198	-28.313432597157128	Emx-Cre+;POMT2F/+	Emx-POMT2-Ctrl	Emx-POMT2	CUX1
8	JJ199	-25.017816206919633	Emx-Cre+;POMT2F/+	Emx-POMT2-Ctrl	Emx-POMT2	CUX1
8	JJ200	-4.212278042969369	Emx-Cre+;POMT2F/+	Emx-POMT2-Ctrl	Emx-POMT2	CUX1
8	JJ201	-33.71130888056293	Emx-Cre+;POMT2F/+	Emx-POMT2-Ctrl	Emx-POMT2	CUX1
8	JJ206	-17.61387718018695	Emx-Cre+;POMT2F/+	Emx-POMT2-Ctrl	Emx-POMT2	CUX1
8	JJ207	-25.97515463446577	Emx-Cre+;POMT2F/+	Emx-POMT2-Ctrl	Emx-POMT2	CUX1
8	JJ208	-10.636207345972025	Emx-Cre+;POMT2F/+	Emx-POMT2-Ctrl	Emx-POMT2	CUX1
8	JJ209	-15.370462118382383	Emx-Cre+;POMT2F/+	Emx-POMT2-Ctrl	Emx-POMT2	CUX1
8	JJ226	22.23706305463338	WT	ICD-Ctrl	ICD	CUX1
8	JJ227	-27.253597309245833	DGdelta/-	ICD-Mutant	ICD	CUX1
8	JJ228	-18.78511640155587	DGdelta/-	ICD-Mutant	ICD	CUX1
8	JJ229	23.18938467190996	DGdelta/-	ICD-Mutant	ICD	CUX1
8	JJ230	-20.270447591030916	DGdelta/-	ICD-Mutant	ICD	CUX1
8	JJ235	-16.499362783608188	WT	ICD-Ctrl	ICD	CUX1
8	JJ236	-23.852943269105214	WT	ICD-Ctrl	ICD	CUX1
8	JJ237	-22.766476437319664	WT	ICD-Ctrl	ICD	CUX1
8	JJ258	-20.66858990915178	FKRPMut	FKRP-Mutant	FKRP	CUX1
8	JJ259	-8.590530627172257	FKRPMut	FKRP-Mutant	FKRP	CUX1
8	JJ260	-40.81827570772947	FKRPMut	FKRP-Mutant	FKRP	CUX1
8	JJ261	-18.428828644232187	FKRPMut	FKRP-Mutant	FKRP	CUX1
8	JJ262	1.7608764355395579	WT	FKRP-Ctrl	FKRP	CUX1
8	JJ263	-45.23694673633626	WT	FKRP-Ctrl	FKRP	CUX1
8	JJ264	-29.4207337085371	WT	FKRP-Ctrl	FKRP	CUX1
8	JJ265	-42.71870058348302	WT	FKRP-Ctrl	FKRP	CUX1
8	JJ266	-11.212388221173102	WT	FKRP-Ctrl	FKRP	CUX1
8	JJ267	-35.89466614944462	WT	FKRP-Ctrl	FKRP	CUX1
8	JJ268	4.992938689590334	WT	FKRP-Ctrl	FKRP	CUX1
8	JJ269	-55.61063649924654	WT	FKRP-Ctrl	FKRP	CUX1
8	JJ270	-16.134126833808168	FKRPMut	FKRP-Mutant	FKRP	CUX1
8	JJ271	-3.427306514838948	FKRPMut	FKRP-Mutant	FKRP	CUX1
8	JJ272	34.19335291018936	FKRPMut	FKRP-Mutant	FKRP	CUX1
8	JJ273	-5.010372489088316	FKRPMut	FKRP-Mutant	FKRP	CUX1
8	JJ274	-34.49461060728547	WT	FKRP-Ctrl	FKRP	CUX1
8	JJ275	8.895973712706374	WT	FKRP-Ctrl	FKRP	CUX1
8	JJ276	-13.482916725529057	WT	FKRP-Ctrl	FKRP	CUX1
8	JJ277	-20.908650993614856	WT	FKRP-Ctrl	FKRP	CUX1
8	JJ306	-1.4632576061592697	DGdelta/-	ICD-Mutant	ICD	CUX1
8	JJ307	41.6848522772926	DGdelta/-	ICD-Mutant	ICD	CUX1
8	JJ308	7.148856928528365	DGdelta/-	ICD-Mutant	ICD	CUX1
8	JJ309	-0.02467372944424066	DGdelta/-	ICD-Mutant	ICD	CUX1
8	JJ314	-9.955659010257099	DGdelta/-	ICD-Mutant	ICD	CUX1
8	JJ315	16.338500123289958	DGdelta/-	ICD-Mutant	ICD	CUX1
8	JJ316	-13.625529968064447	DGdelta/-	ICD-Mutant	ICD	CUX1
8	JJ317	15.826157098323051	DGdelta/-	ICD-Mutant	ICD	CUX1
8	JJ322	-7.771674189305675	WT	ICD-Ctrl	ICD	CUX1
8	JJ323	-52.423645237139986	WT	ICD-Ctrl	ICD	CUX1
8	JJ324	-42.33019506416432	WT	ICD-Ctrl	ICD	CUX1
8	JJ325	14.296133157298604	WT	ICD-Ctrl	ICD	CUX1
8	JJ330	24.284881019430713	WT	ICD-Ctrl	ICD	CUX1
8	JJ331	61.37159687315557	WT	ICD-Ctrl	ICD	CUX1
8	JJ332	26.067353147741148	WT	ICD-Ctrl	ICD	CUX1
8	JJ333	-31.523536809002735	WT	ICD-Ctrl	ICD	CUX1
8	JJ346	-0.6540669278901229	FKRPMut	FKRP-Mutant	FKRP	CUX1
8	JJ347	27.781556212988033	FKRPMut	FKRP-Mutant	FKRP	CUX1
8	JJ348	252.9256668375805	FKRPMut	FKRP-Mutant	FKRP	CUX1
8	JJ349	-12.006032934715071	FKRPMut	FKRP-Mutant	FKRP	CUX1
8	JJ350	-3.976773024516433	WT	FKRP-Ctrl	FKRP	CUX1
8	JJ351	-20.394115744703225	WT	FKRP-Ctrl	FKRP	CUX1
8	JJ352	0.7341475338128021	WT	FKRP-Ctrl	FKRP	CUX1
8	JJ353	-14.352142205772148	WT	FKRP-Ctrl	FKRP	CUX1
8	JJ354	197.9800976327862	Emx-Cre+;DGF/-	Emx-DG-cKO	Emx-DG	CUX1
8	JJ355	27.243412544124567	Emx-Cre+;DGF/-	Emx-DG-cKO	Emx-DG	CUX1
8	JJ356	244.30654177050778	Emx-Cre+;DGF/-	Emx-DG-cKO	Emx-DG	CUX1
8	JJ357	43.93341127719096	Emx-Cre+;DGF/-	Emx-DG-cKO	Emx-DG	CUX1
8	JJ362	-39.17196760903198	Emx-Cre+;DGF/+	Emx-DG-Ctrl	Emx-DG	CUX1
8	JJ363	-12.075187006030623	Emx-Cre+;DGF/+	Emx-DG-Ctrl	Emx-DG	CUX1
8	JJ364	2.3980196561481457	Emx-Cre+;DGF/+	Emx-DG-Ctrl	Emx-DG	CUX1
8	JJ365	-9.231967653731544	Emx-Cre+;DGF/+	Emx-DG-Ctrl	Emx-DG	CUX1
8	JJ370	18.108566920854173	Emx-Cre+;DGF/-	Emx-DG-cKO	Emx-DG	CUX1
8	JJ371	207.20379942025292	Emx-Cre+;DGF/-	Emx-DG-cKO	Emx-DG	CUX1
8	JJ372	199.73678477803108	Emx-Cre+;DGF/-	Emx-DG-cKO	Emx-DG	CUX1
8	JJ373	109.26615026188828	Emx-Cre+;DGF/-	Emx-DG-cKO	Emx-DG	CUX1
8	JJ378	171.7696356115181	Emx-Cre+;DGF/-	Emx-DG-cKO	Emx-DG	CUX1
8	JJ379	69.30323898485166	Emx-Cre+;DGF/-	Emx-DG-cKO	Emx-DG	CUX1
8	JJ380	63.97810510791002	Emx-Cre+;DGF/-	Emx-DG-cKO	Emx-DG	CUX1
8	JJ381	97.14684275784013	Emx-Cre+;DGF/-	Emx-DG-cKO	Emx-DG	CUX1
8	JJ386	-10.419863620689625	Emx-Cre+;DGF/+	Emx-DG-Ctrl	Emx-DG	CUX1
8	JJ387	14.204902432117612	Emx-Cre+;DGF/+	Emx-DG-Ctrl	Emx-DG	CUX1
8	JJ388	5.571175938206106	Emx-Cre+;DGF/+	Emx-DG-Ctrl	Emx-DG	CUX1
8	JJ392	-16.821207504002206	Emx-Cre+;DGF/+	Emx-DG-Ctrl	Emx-DG	CUX1
8	JJ393	-14.642159691732749	Emx-Cre+;DGF/+	Emx-DG-Ctrl	Emx-DG	CUX1
8	JJ394	3.731658269613225	Emx-Cre+;DGF/+	Emx-DG-Ctrl	Emx-DG	CUX1
8	JJ395	-14.220075533890073	Emx-Cre+;DGF/+	Emx-DG-Ctrl	Emx-DG	CUX1
9	JJ001	-3.694396384479736	Emx-Cre+;POMT2F/+	Emx-POMT2-Ctrl	Emx-POMT2	CUX1
9	JJ002	-10.859068198146455	Emx-Cre+;POMT2F/+	Emx-POMT2-Ctrl	Emx-POMT2	CUX1
9	JJ003	-10.25204994396961	Emx-Cre+;POMT2F/+	Emx-POMT2-Ctrl	Emx-POMT2	CUX1
9	JJ004	-14.449367712449316	Emx-Cre+;POMT2F/F	Emx-POMT2-cKO	Emx-POMT2	CUX1
9	JJ005	-1.9736151724137965	Emx-Cre+;POMT2F/F	Emx-POMT2-cKO	Emx-POMT2	CUX1
9	JJ006	10.386565283082936	Emx-Cre+;POMT2F/F	Emx-POMT2-cKO	Emx-POMT2	CUX1
9	JJ007	-12.231396614115491	Emx-Cre+;POMT2F/+	Emx-POMT2-Ctrl	Emx-POMT2	CUX1
9	JJ008	19.832223408137185	Emx-Cre+;POMT2F/F	Emx-POMT2-cKO	Emx-POMT2	CUX1
9	JJ053	-2.3871085177489326	WT	B4GAT1-Ctrl	B4GAT1	CUX1
9	JJ054	15.571593013426233	WT	B4GAT1-Ctrl	B4GAT1	CUX1
9	JJ055	84.69215353417376	WT	B4GAT1-Ctrl	B4GAT1	CUX1
9	JJ056	18.45038549409844	WT	B4GAT1-Ctrl	B4GAT1	CUX1
9	JJ057	-11.737321547754732	B4GAT1M155T/M155T;Thy1	B4GAT1-Mutant	B4GAT1	CUX1
9	JJ058	17.376176017349223	B4GAT1M155T/M155T;Thy1	B4GAT1-Mutant	B4GAT1	CUX1
9	JJ059	32.95431751266839	B4GAT1M155T/M155T;Thy1	B4GAT1-Mutant	B4GAT1	CUX1
9	JJ060	29.27167278951926	B4GAT1M155T/M155T;Thy1	B4GAT1-Mutant	B4GAT1	CUX1
9	JJ069	-1.4289880664088817	B4GAT1M155T/M155T;Thy1	B4GAT1-Mutant	B4GAT1	CUX1
9	JJ070	25.85808279013717	B4GAT1M155T/M155T;Thy1	B4GAT1-Mutant	B4GAT1	CUX1
9	JJ071	50.45778200492134	B4GAT1M155T/M155T	B4GAT1-Mutant	B4GAT1	CUX1
9	JJ072	1.0481684519574326	B4GAT1M155T/M155T	B4GAT1-Mutant	B4GAT1	CUX1
9	JJ073	-10.66527243534002	B4GAT1M155T/M155T	B4GAT1-Mutant	B4GAT1	CUX1
9	JJ074	-0.13287109401710495	B4GAT1M155T/M155T	B4GAT1-Mutant	B4GAT1	CUX1
9	JJ075	-12.597961206402298	B4GAT1M155T/M155T;Thy1	B4GAT1-Mutant	B4GAT1	CUX1
9	JJ076	-19.059005500896586	B4GAT1M155T/M155T;Thy1	B4GAT1-Mutant	B4GAT1	CUX1
9	JJ086	-27.186452691128807	B4GAT1M155T/M155T	B4GAT1-Mutant	B4GAT1	CUX1
9	JJ087	-24.436222164176684	B4GAT1M155T/M155T	B4GAT1-Mutant	B4GAT1	CUX1
9	JJ088	-37.168740054029286	B4GAT1M155T/M155T	B4GAT1-Mutant	B4GAT1	CUX1
9	JJ089	-29.640379723519647	B4GAT1M155T/M155T	B4GAT1-Mutant	B4GAT1	CUX1
9	JJ090	-20.598397042735012	B4GAT1M155T/M155T;Thy1	B4GAT1-Mutant	B4GAT1	CUX1
9	JJ091	13.486185641774265	B4GAT1M155T/M155T;Thy1	B4GAT1-Mutant	B4GAT1	CUX1
9	JJ092	16.661783265675393	B4GAT1M155T/M155T;Thy1	B4GAT1-Mutant	B4GAT1	CUX1
9	JJ093	22.527558175505078	B4GAT1M155T/M155T;Thy1	B4GAT1-Mutant	B4GAT1	CUX1
9	JJ106	-24.89878973806367	WT	B4GAT1-Ctrl	B4GAT1	CUX1
9	JJ107	-42.61088389661351	WT	B4GAT1-Ctrl	B4GAT1	CUX1
9	JJ108	-2.9135579043734956	WT	B4GAT1-Ctrl	B4GAT1	CUX1
9	JJ109	0.5669491023576256	WT	B4GAT1-Ctrl	B4GAT1	CUX1
9	JJ114	1.7342438718064084	WT	B4GAT1-Ctrl	B4GAT1	CUX1
9	JJ115	54.78696080954137	WT	B4GAT1-Ctrl	B4GAT1	CUX1
9	JJ116	-6.251680677030852	WT	B4GAT1-Ctrl	B4GAT1	CUX1
9	JJ117	-15.715507815933506	WT	B4GAT1-Ctrl	B4GAT1	CUX1
9	JJ118	31.355177406313885	Emx-Cre+;DGF/-	Emx-DG-cKO	Emx-DG	CUX1
9	JJ119	38.53535474939114	Emx-Cre+;DGF/-	Emx-DG-cKO	Emx-DG	CUX1
9	JJ120	-7.233745664658765	Emx-Cre+;DGF/-	Emx-DG-cKO	Emx-DG	CUX1
9	JJ121	1.8272175854330044	Emx-Cre+;DGF/-	Emx-DG-cKO	Emx-DG	CUX1
9	JJ126	120.01170913854901	Emx-Cre+;DGF/-	Emx-DG-cKO	Emx-DG	CUX1
9	JJ127	218.17899545866638	Emx-Cre+;DGF/-	Emx-DG-cKO	Emx-DG	CUX1
9	JJ128	53.27786833598079	Emx-Cre+;DGF/-	Emx-DG-cKO	Emx-DG	CUX1
9	JJ129	45.0429108421911	Emx-Cre+;DGF/-	Emx-DG-cKO	Emx-DG	CUX1
9	JJ138	3.1178001719117105	Emx-Cre+;DGF/+	Emx-DG-Ctrl	Emx-DG	CUX1
9	JJ139	9.016201985973245	Emx-Cre+;DGF/+	Emx-DG-Ctrl	Emx-DG	CUX1
9	JJ140	-0.12361886730697809	Emx-Cre+;DGF/+	Emx-DG-Ctrl	Emx-DG	CUX1
9	JJ141	2.4707999408530363	Emx-Cre+;DGF/+	Emx-DG-Ctrl	Emx-DG	CUX1
9	JJ158	10.018202210953348	Emx-Cre+;POMT2F/F	Emx-POMT2-cKO	Emx-POMT2	CUX1
9	JJ159	27.774464763098326	Emx-Cre+;POMT2F/F	Emx-POMT2-cKO	Emx-POMT2	CUX1
9	JJ160	0.6102517545122813	Emx-Cre+;POMT2F/F	Emx-POMT2-cKO	Emx-POMT2	CUX1
9	JJ161	38.980422893537856	Emx-Cre+;POMT2F/F	Emx-POMT2-cKO	Emx-POMT2	CUX1
9	JJ162	-4.3427526747532665	Emx-Cre+;POMT2F/+	Emx-POMT2-Ctrl	Emx-POMT2	CUX1
9	JJ163	-28.01329951312884	Emx-Cre+;POMT2F/+	Emx-POMT2-Ctrl	Emx-POMT2	CUX1
9	JJ164	-13.735014424669393	Emx-Cre+;POMT2F/+	Emx-POMT2-Ctrl	Emx-POMT2	CUX1
9	JJ165	-4.917774866650764	Emx-Cre+;POMT2F/+	Emx-POMT2-Ctrl	Emx-POMT2	CUX1
9	JJ190	57.2511188840164	Emx-Cre+;POMT2F/F	Emx-POMT2-cKO	Emx-POMT2	CUX1
9	JJ191	42.73811823059223	Emx-Cre+;POMT2F/F	Emx-POMT2-cKO	Emx-POMT2	CUX1
9	JJ192	102.44735934222653	Emx-Cre+;POMT2F/F	Emx-POMT2-cKO	Emx-POMT2	CUX1
9	JJ193	5.548319866022666	Emx-Cre+;POMT2F/F	Emx-POMT2-cKO	Emx-POMT2	CUX1
9	JJ198	-28.42170332365286	Emx-Cre+;POMT2F/+	Emx-POMT2-Ctrl	Emx-POMT2	CUX1
9	JJ199	-14.748335826189248	Emx-Cre+;POMT2F/+	Emx-POMT2-Ctrl	Emx-POMT2	CUX1
9	JJ200	-4.107906941478272	Emx-Cre+;POMT2F/+	Emx-POMT2-Ctrl	Emx-POMT2	CUX1
9	JJ201	-14.772295052092545	Emx-Cre+;POMT2F/+	Emx-POMT2-Ctrl	Emx-POMT2	CUX1
9	JJ206	-7.29667588148565	Emx-Cre+;POMT2F/+	Emx-POMT2-Ctrl	Emx-POMT2	CUX1
9	JJ207	-21.111336325287027	Emx-Cre+;POMT2F/+	Emx-POMT2-Ctrl	Emx-POMT2	CUX1
9	JJ208	2.1002659456262145	Emx-Cre+;POMT2F/+	Emx-POMT2-Ctrl	Emx-POMT2	CUX1
9	JJ209	-10.671767436252935	Emx-Cre+;POMT2F/+	Emx-POMT2-Ctrl	Emx-POMT2	CUX1
9	JJ226	4.359408030954796	WT	ICD-Ctrl	ICD	CUX1
9	JJ227	-19.967860829541944	DGdelta/-	ICD-Mutant	ICD	CUX1
9	JJ228	-17.990941545709955	DGdelta/-	ICD-Mutant	ICD	CUX1
9	JJ229	15.955203921549204	DGdelta/-	ICD-Mutant	ICD	CUX1
9	JJ230	16.57122510101135	DGdelta/-	ICD-Mutant	ICD	CUX1
9	JJ235	-21.79870193524452	WT	ICD-Ctrl	ICD	CUX1
9	JJ236	-12.769440565572191	WT	ICD-Ctrl	ICD	CUX1
9	JJ237	-21.84987515895246	WT	ICD-Ctrl	ICD	CUX1
9	JJ258	-15.85987692212393	FKRPMut	FKRP-Mutant	FKRP	CUX1
9	JJ259	-0.38824556146134154	FKRPMut	FKRP-Mutant	FKRP	CUX1
9	JJ260	-14.467455627214171	FKRPMut	FKRP-Mutant	FKRP	CUX1
9	JJ261	-9.648141537659209	FKRPMut	FKRP-Mutant	FKRP	CUX1
9	JJ262	-9.871019983114175	WT	FKRP-Ctrl	FKRP	CUX1
9	JJ263	-27.583845233007747	WT	FKRP-Ctrl	FKRP	CUX1
9	JJ264	-6.4791737043562865	WT	FKRP-Ctrl	FKRP	CUX1
9	JJ265	-30.693861824657308	WT	FKRP-Ctrl	FKRP	CUX1
9	JJ266	8.743130963539784	WT	FKRP-Ctrl	FKRP	CUX1
9	JJ267	-35.095633638012146	WT	FKRP-Ctrl	FKRP	CUX1
9	JJ268	-1.2117778073434364	WT	FKRP-Ctrl	FKRP	CUX1
9	JJ269	-36.54120022900626	WT	FKRP-Ctrl	FKRP	CUX1
9	JJ270	-17.463570526432427	FKRPMut	FKRP-Mutant	FKRP	CUX1
9	JJ271	-0.7980399707703832	FKRPMut	FKRP-Mutant	FKRP	CUX1
9	JJ272	13.91266386239877	FKRPMut	FKRP-Mutant	FKRP	CUX1
9	JJ273	-8.306774585515162	FKRPMut	FKRP-Mutant	FKRP	CUX1
9	JJ274	-31.85559378764424	WT	FKRP-Ctrl	FKRP	CUX1
9	JJ275	23.53680107100024	WT	FKRP-Ctrl	FKRP	CUX1
9	JJ276	7.934086731261061	WT	FKRP-Ctrl	FKRP	CUX1
9	JJ277	21.490651234218188	WT	FKRP-Ctrl	FKRP	CUX1
9	JJ306	0.3068896850760818	DGdelta/-	ICD-Mutant	ICD	CUX1
9	JJ307	-15.145316986776644	DGdelta/-	ICD-Mutant	ICD	CUX1
9	JJ308	-15.658038606626215	DGdelta/-	ICD-Mutant	ICD	CUX1
9	JJ309	-9.254301394988564	DGdelta/-	ICD-Mutant	ICD	CUX1
9	JJ314	2.291507063435271	DGdelta/-	ICD-Mutant	ICD	CUX1
9	JJ315	-15.618162660592816	DGdelta/-	ICD-Mutant	ICD	CUX1
9	JJ316	-42.17186766037215	DGdelta/-	ICD-Mutant	ICD	CUX1
9	JJ317	9.397715379011743	DGdelta/-	ICD-Mutant	ICD	CUX1
9	JJ322	45.96347835308328	WT	ICD-Ctrl	ICD	CUX1
9	JJ323	3.282797519723772	WT	ICD-Ctrl	ICD	CUX1
9	JJ324	56.10439549346696	WT	ICD-Ctrl	ICD	CUX1
9	JJ325	-4.149292130057726	WT	ICD-Ctrl	ICD	CUX1
9	JJ330	4.039551654351385	WT	ICD-Ctrl	ICD	CUX1
9	JJ331	43.26606683387384	WT	ICD-Ctrl	ICD	CUX1
9	JJ332	9.953042918277143	WT	ICD-Ctrl	ICD	CUX1
9	JJ333	-25.060380948290724	WT	ICD-Ctrl	ICD	CUX1
9	JJ346	55.28539470291067	FKRPMut	FKRP-Mutant	FKRP	CUX1
9	JJ347	61.28974461531792	FKRPMut	FKRP-Mutant	FKRP	CUX1
9	JJ348	288.85738421124285	FKRPMut	FKRP-Mutant	FKRP	CUX1
9	JJ349	-11.068016947755154	FKRPMut	FKRP-Mutant	FKRP	CUX1
9	JJ350	6.817257317363897	WT	FKRP-Ctrl	FKRP	CUX1
9	JJ351	16.25479222474284	WT	FKRP-Ctrl	FKRP	CUX1
9	JJ352	19.332409431496405	WT	FKRP-Ctrl	FKRP	CUX1
9	JJ353	0.3136020054555881	WT	FKRP-Ctrl	FKRP	CUX1
9	JJ354	287.29138394231006	Emx-Cre+;DGF/-	Emx-DG-cKO	Emx-DG	CUX1
9	JJ355	37.58704257615943	Emx-Cre+;DGF/-	Emx-DG-cKO	Emx-DG	CUX1
9	JJ356	258.7373374728534	Emx-Cre+;DGF/-	Emx-DG-cKO	Emx-DG	CUX1
9	JJ357	19.850906845674746	Emx-Cre+;DGF/-	Emx-DG-cKO	Emx-DG	CUX1
9	JJ362	-27.114143283214123	Emx-Cre+;DGF/+	Emx-DG-Ctrl	Emx-DG	CUX1
9	JJ363	-18.914729610648276	Emx-Cre+;DGF/+	Emx-DG-Ctrl	Emx-DG	CUX1
9	JJ364	-19.521674259992135	Emx-Cre+;DGF/+	Emx-DG-Ctrl	Emx-DG	CUX1
9	JJ365	0.2802664203425517	Emx-Cre+;DGF/+	Emx-DG-Ctrl	Emx-DG	CUX1
9	JJ370	56.93961840894948	Emx-Cre+;DGF/-	Emx-DG-cKO	Emx-DG	CUX1
9	JJ371	122.1207980196927	Emx-Cre+;DGF/-	Emx-DG-cKO	Emx-DG	CUX1
9	JJ372	193.94815039810092	Emx-Cre+;DGF/-	Emx-DG-cKO	Emx-DG	CUX1
9	JJ373	77.00995556378719	Emx-Cre+;DGF/-	Emx-DG-cKO	Emx-DG	CUX1
9	JJ378	106.51455036935289	Emx-Cre+;DGF/-	Emx-DG-cKO	Emx-DG	CUX1
9	JJ379	40.63513017211708	Emx-Cre+;DGF/-	Emx-DG-cKO	Emx-DG	CUX1
9	JJ380	196.04974388656964	Emx-Cre+;DGF/-	Emx-DG-cKO	Emx-DG	CUX1
9	JJ381	106.16640450082413	Emx-Cre+;DGF/-	Emx-DG-cKO	Emx-DG	CUX1
9	JJ386	15.127411858237565	Emx-Cre+;DGF/+	Emx-DG-Ctrl	Emx-DG	CUX1
9	JJ387	20.634852167567335	Emx-Cre+;DGF/+	Emx-DG-Ctrl	Emx-DG	CUX1
9	JJ388	68.07866709647311	Emx-Cre+;DGF/+	Emx-DG-Ctrl	Emx-DG	CUX1
9	JJ392	-0.7050513928910883	Emx-Cre+;DGF/+	Emx-DG-Ctrl	Emx-DG	CUX1
9	JJ393	-17.303169611565977	Emx-Cre+;DGF/+	Emx-DG-Ctrl	Emx-DG	CUX1
9	JJ394	0.7541820031168148	Emx-Cre+;DGF/+	Emx-DG-Ctrl	Emx-DG	CUX1
9	JJ395	-13.257582420959332	Emx-Cre+;DGF/+	Emx-DG-Ctrl	Emx-DG	CUX1
10	JJ001	21.224793174603178	Emx-Cre+;POMT2F/+	Emx-POMT2-Ctrl	Emx-POMT2	CUX1
10	JJ002	-0.16882015331687703	Emx-Cre+;POMT2F/+	Emx-POMT2-Ctrl	Emx-POMT2	CUX1
10	JJ003	1.3078436932573634	Emx-Cre+;POMT2F/+	Emx-POMT2-Ctrl	Emx-POMT2	CUX1
10	JJ004	6.542511416679834	Emx-Cre+;POMT2F/F	Emx-POMT2-cKO	Emx-POMT2	CUX1
10	JJ005	19.264263371647512	Emx-Cre+;POMT2F/F	Emx-POMT2-cKO	Emx-POMT2	CUX1
10	JJ006	32.61358601137425	Emx-Cre+;POMT2F/F	Emx-POMT2-cKO	Emx-POMT2	CUX1
10	JJ007	-6.230340967181784	Emx-Cre+;POMT2F/+	Emx-POMT2-Ctrl	Emx-POMT2	CUX1
10	JJ008	23.26501032354194	Emx-Cre+;POMT2F/F	Emx-POMT2-cKO	Emx-POMT2	CUX1
10	JJ053	-2.3621163069882414	WT	B4GAT1-Ctrl	B4GAT1	CUX1
10	JJ054	13.009565185143344	WT	B4GAT1-Ctrl	B4GAT1	CUX1
10	JJ055	77.18802042330985	WT	B4GAT1-Ctrl	B4GAT1	CUX1
10	JJ056	4.317064096730405	WT	B4GAT1-Ctrl	B4GAT1	CUX1
10	JJ057	-11.08834828768145	B4GAT1M155T/M155T;Thy1	B4GAT1-Mutant	B4GAT1	CUX1
10	JJ058	36.34916032711353	B4GAT1M155T/M155T;Thy1	B4GAT1-Mutant	B4GAT1	CUX1
10	JJ059	43.807707476826145	B4GAT1M155T/M155T;Thy1	B4GAT1-Mutant	B4GAT1	CUX1
10	JJ060	36.32246549746632	B4GAT1M155T/M155T;Thy1	B4GAT1-Mutant	B4GAT1	CUX1
10	JJ069	-1.998690142110945	B4GAT1M155T/M155T;Thy1	B4GAT1-Mutant	B4GAT1	CUX1
10	JJ070	66.57990059386971	B4GAT1M155T/M155T;Thy1	B4GAT1-Mutant	B4GAT1	CUX1
10	JJ071	47.0276497718163	B4GAT1M155T/M155T	B4GAT1-Mutant	B4GAT1	CUX1
10	JJ072	-1.9868337515154053	B4GAT1M155T/M155T	B4GAT1-Mutant	B4GAT1	CUX1
10	JJ073	-7.668038663508052	B4GAT1M155T/M155T	B4GAT1-Mutant	B4GAT1	CUX1
10	JJ074	-10.597556669244304	B4GAT1M155T/M155T	B4GAT1-Mutant	B4GAT1	CUX1
10	JJ075	76.67241758772627	B4GAT1M155T/M155T;Thy1	B4GAT1-Mutant	B4GAT1	CUX1
10	JJ076	-11.366327238168955	B4GAT1M155T/M155T;Thy1	B4GAT1-Mutant	B4GAT1	CUX1
10	JJ086	-39.68494339404655	B4GAT1M155T/M155T	B4GAT1-Mutant	B4GAT1	CUX1
10	JJ087	9.138487077445916	B4GAT1M155T/M155T	B4GAT1-Mutant	B4GAT1	CUX1
10	JJ088	-19.676927776862044	B4GAT1M155T/M155T	B4GAT1-Mutant	B4GAT1	CUX1
10	JJ089	-37.75298423193393	B4GAT1M155T/M155T	B4GAT1-Mutant	B4GAT1	CUX1
10	JJ090	24.969159215574525	B4GAT1M155T/M155T;Thy1	B4GAT1-Mutant	B4GAT1	CUX1
10	JJ091	27.63405829441035	B4GAT1M155T/M155T;Thy1	B4GAT1-Mutant	B4GAT1	CUX1
10	JJ092	3.2545453587334428	B4GAT1M155T/M155T;Thy1	B4GAT1-Mutant	B4GAT1	CUX1
10	JJ093	-27.557414678030266	B4GAT1M155T/M155T;Thy1	B4GAT1-Mutant	B4GAT1	CUX1
10	JJ106	-1.3643266598307189	WT	B4GAT1-Ctrl	B4GAT1	CUX1
10	JJ107	3.2032959212396386	WT	B4GAT1-Ctrl	B4GAT1	CUX1
10	JJ108	-22.19119866777309	WT	B4GAT1-Ctrl	B4GAT1	CUX1
10	JJ109	-1.0062252751971528	WT	B4GAT1-Ctrl	B4GAT1	CUX1
10	JJ114	-16.763645724327755	WT	B4GAT1-Ctrl	B4GAT1	CUX1
10	JJ115	60.222650131009765	WT	B4GAT1-Ctrl	B4GAT1	CUX1
10	JJ116	4.268659169712426	WT	B4GAT1-Ctrl	B4GAT1	CUX1
10	JJ117	6.864395450859661	WT	B4GAT1-Ctrl	B4GAT1	CUX1
10	JJ118	59.33739781537842	Emx-Cre+;DGF/-	Emx-DG-cKO	Emx-DG	CUX1
10	JJ119	42.18674547665688	Emx-Cre+;DGF/-	Emx-DG-cKO	Emx-DG	CUX1
10	JJ120	-3.545297193384139	Emx-Cre+;DGF/-	Emx-DG-cKO	Emx-DG	CUX1
10	JJ121	20.645422937844234	Emx-Cre+;DGF/-	Emx-DG-cKO	Emx-DG	CUX1
10	JJ126	136.6090839292115	Emx-Cre+;DGF/-	Emx-DG-cKO	Emx-DG	CUX1
10	JJ127	196.22591693145884	Emx-Cre+;DGF/-	Emx-DG-cKO	Emx-DG	CUX1
10	JJ128	100.1273344466846	Emx-Cre+;DGF/-	Emx-DG-cKO	Emx-DG	CUX1
10	JJ129	44.79369912476657	Emx-Cre+;DGF/-	Emx-DG-cKO	Emx-DG	CUX1
10	JJ138	-8.629254442783633	Emx-Cre+;DGF/+	Emx-DG-Ctrl	Emx-DG	CUX1
10	JJ139	34.89112280169178	Emx-Cre+;DGF/+	Emx-DG-Ctrl	Emx-DG	CUX1
10	JJ140	-6.051716556382625	Emx-Cre+;DGF/+	Emx-DG-Ctrl	Emx-DG	CUX1
10	JJ141	-4.18909664139098	Emx-Cre+;DGF/+	Emx-DG-Ctrl	Emx-DG	CUX1
10	JJ158	20.866607501178105	Emx-Cre+;POMT2F/F	Emx-POMT2-cKO	Emx-POMT2	CUX1
10	JJ159	28.091890879184024	Emx-Cre+;POMT2F/F	Emx-POMT2-cKO	Emx-POMT2	CUX1
10	JJ160	7.06310015233917	Emx-Cre+;POMT2F/F	Emx-POMT2-cKO	Emx-POMT2	CUX1
10	JJ161	91.9794631532781	Emx-Cre+;POMT2F/F	Emx-POMT2-cKO	Emx-POMT2	CUX1
10	JJ162	-70.80836069336301	Emx-Cre+;POMT2F/+	Emx-POMT2-Ctrl	Emx-POMT2	CUX1
10	JJ163	-15.735465777517012	Emx-Cre+;POMT2F/+	Emx-POMT2-Ctrl	Emx-POMT2	CUX1
10	JJ164	-5.347445842293912	Emx-Cre+;POMT2F/+	Emx-POMT2-Ctrl	Emx-POMT2	CUX1
10	JJ165	9.153940607332666	Emx-Cre+;POMT2F/+	Emx-POMT2-Ctrl	Emx-POMT2	CUX1
10	JJ190	126.7057509452997	Emx-Cre+;POMT2F/F	Emx-POMT2-cKO	Emx-POMT2	CUX1
10	JJ191	88.90218815564924	Emx-Cre+;POMT2F/F	Emx-POMT2-cKO	Emx-POMT2	CUX1
10	JJ192	159.02437059298086	Emx-Cre+;POMT2F/F	Emx-POMT2-cKO	Emx-POMT2	CUX1
10	JJ193	23.11004202511354	Emx-Cre+;POMT2F/F	Emx-POMT2-cKO	Emx-POMT2	CUX1
10	JJ198	-26.733641656986208	Emx-Cre+;POMT2F/+	Emx-POMT2-Ctrl	Emx-POMT2	CUX1
10	JJ199	-3.6083811002978528	Emx-Cre+;POMT2F/+	Emx-POMT2-Ctrl	Emx-POMT2	CUX1
10	JJ200	2.7511043908930524	Emx-Cre+;POMT2F/+	Emx-POMT2-Ctrl	Emx-POMT2	CUX1
10	JJ201	-14.849954197391696	Emx-Cre+;POMT2F/+	Emx-POMT2-Ctrl	Emx-POMT2	CUX1
10	JJ206	24.33956782891026	Emx-Cre+;POMT2F/+	Emx-POMT2-Ctrl	Emx-POMT2	CUX1
10	JJ207	-3.17184418588054	Emx-Cre+;POMT2F/+	Emx-POMT2-Ctrl	Emx-POMT2	CUX1
10	JJ208	1.751497155943677	Emx-Cre+;POMT2F/+	Emx-POMT2-Ctrl	Emx-POMT2	CUX1
10	JJ209	-8.051693317068763	Emx-Cre+;POMT2F/+	Emx-POMT2-Ctrl	Emx-POMT2	CUX1
10	JJ226	-0.6754548025094588	WT	ICD-Ctrl	ICD	CUX1
10	JJ227	16.458832509124175	DGdelta/-	ICD-Mutant	ICD	CUX1
10	JJ228	-15.917165878013785	DGdelta/-	ICD-Mutant	ICD	CUX1
10	JJ229	21.350634873287465	DGdelta/-	ICD-Mutant	ICD	CUX1
10	JJ230	10.060679393096052	DGdelta/-	ICD-Mutant	ICD	CUX1
10	JJ235	-3.8606110540184773	WT	ICD-Ctrl	ICD	CUX1
10	JJ236	2.7224217692972466	WT	ICD-Ctrl	ICD	CUX1
10	JJ237	-42.51730463426107	WT	ICD-Ctrl	ICD	CUX1
10	JJ258	-10.891425658521245	FKRPMut	FKRP-Mutant	FKRP	CUX1
10	JJ259	7.030884747678404	FKRPMut	FKRP-Mutant	FKRP	CUX1
10	JJ260	-26.144834934782605	FKRPMut	FKRP-Mutant	FKRP	CUX1
10	JJ261	-4.254765238435084	FKRPMut	FKRP-Mutant	FKRP	CUX1
10	JJ262	1.9836798186719495	WT	FKRP-Ctrl	FKRP	CUX1
10	JJ263	-17.02447692746271	WT	FKRP-Ctrl	FKRP	CUX1
10	JJ264	10.956851252710269	WT	FKRP-Ctrl	FKRP	CUX1
10	JJ265	-11.35639595880817	WT	FKRP-Ctrl	FKRP	CUX1
10	JJ266	-5.060131874100218	WT	FKRP-Ctrl	FKRP	CUX1
10	JJ267	-23.221477439767188	WT	FKRP-Ctrl	FKRP	CUX1
10	JJ268	9.180713502028336	WT	FKRP-Ctrl	FKRP	CUX1
10	JJ269	-9.616772444601768	WT	FKRP-Ctrl	FKRP	CUX1
10	JJ270	-15.424159465970256	FKRPMut	FKRP-Mutant	FKRP	CUX1
10	JJ271	6.352263068794766	FKRPMut	FKRP-Mutant	FKRP	CUX1
10	JJ272	36.74134587071967	FKRPMut	FKRP-Mutant	FKRP	CUX1
10	JJ273	-12.22692717144917	FKRPMut	FKRP-Mutant	FKRP	CUX1
10	JJ274	-15.26811381062951	WT	FKRP-Ctrl	FKRP	CUX1
10	JJ275	51.61087005867925	WT	FKRP-Ctrl	FKRP	CUX1
10	JJ276	-13.55634840542325	WT	FKRP-Ctrl	FKRP	CUX1
10	JJ277	26.79820519197644	WT	FKRP-Ctrl	FKRP	CUX1
10	JJ306	-48.12196129968792	DGdelta/-	ICD-Mutant	ICD	CUX1
10	JJ307	-29.94706958417923	DGdelta/-	ICD-Mutant	ICD	CUX1
10	JJ308	-19.206662336157553	DGdelta/-	ICD-Mutant	ICD	CUX1
10	JJ309	4.119842276021093	DGdelta/-	ICD-Mutant	ICD	CUX1
10	JJ314	3.5836817204871445	DGdelta/-	ICD-Mutant	ICD	CUX1
10	JJ315	36.83919942176927	DGdelta/-	ICD-Mutant	ICD	CUX1
10	JJ316	-18.017029015683494	DGdelta/-	ICD-Mutant	ICD	CUX1
10	JJ317	66.85089931517761	DGdelta/-	ICD-Mutant	ICD	CUX1
10	JJ322	66.35340552083926	WT	ICD-Ctrl	ICD	CUX1
10	JJ323	-12.58620896636925	WT	ICD-Ctrl	ICD	CUX1
10	JJ324	10.140259049784012	WT	ICD-Ctrl	ICD	CUX1
10	JJ325	-2.0233836419940494	WT	ICD-Ctrl	ICD	CUX1
10	JJ330	30.583537330322883	WT	ICD-Ctrl	ICD	CUX1
10	JJ331	54.14743320873356	WT	ICD-Ctrl	ICD	CUX1
10	JJ332	84.47190563858366	WT	ICD-Ctrl	ICD	CUX1
10	JJ333	-23.363002176968127	WT	ICD-Ctrl	ICD	CUX1
10	JJ346	99.81071914296335	FKRPMut	FKRP-Mutant	FKRP	CUX1
10	JJ347	21.804638315477444	FKRPMut	FKRP-Mutant	FKRP	CUX1
10	JJ348	176.9952272777308	FKRPMut	FKRP-Mutant	FKRP	CUX1
10	JJ349	-19.614465716377822	FKRPMut	FKRP-Mutant	FKRP	CUX1
10	JJ350	19.258232794946707	WT	FKRP-Ctrl	FKRP	CUX1
10	JJ351	69.89669179497939	WT	FKRP-Ctrl	FKRP	CUX1
10	JJ352	3.3199243722453957	WT	FKRP-Ctrl	FKRP	CUX1
10	JJ353	-11.57133719161258	WT	FKRP-Ctrl	FKRP	CUX1
10	JJ354	252.14610302600408	Emx-Cre+;DGF/-	Emx-DG-cKO	Emx-DG	CUX1
10	JJ355	96.51740704502386	Emx-Cre+;DGF/-	Emx-DG-cKO	Emx-DG	CUX1
10	JJ356	366.23332890005645	Emx-Cre+;DGF/-	Emx-DG-cKO	Emx-DG	CUX1
10	JJ357	64.30739892574547	Emx-Cre+;DGF/-	Emx-DG-cKO	Emx-DG	CUX1
10	JJ362	-14.907478001205618	Emx-Cre+;DGF/+	Emx-DG-Ctrl	Emx-DG	CUX1
10	JJ363	-33.51685590324007	Emx-Cre+;DGF/+	Emx-DG-Ctrl	Emx-DG	CUX1
10	JJ364	6.167638023958489	Emx-Cre+;DGF/+	Emx-DG-Ctrl	Emx-DG	CUX1
10	JJ365	-17.30060248426501	Emx-Cre+;DGF/+	Emx-DG-Ctrl	Emx-DG	CUX1
10	JJ370	135.09696275418756	Emx-Cre+;DGF/-	Emx-DG-cKO	Emx-DG	CUX1
10	JJ371	158.07895124098124	Emx-Cre+;DGF/-	Emx-DG-cKO	Emx-DG	CUX1
10	JJ372	219.4050768516495	Emx-Cre+;DGF/-	Emx-DG-cKO	Emx-DG	CUX1
10	JJ373	113.4725039022344	Emx-Cre+;DGF/-	Emx-DG-cKO	Emx-DG	CUX1
10	JJ378	122.50457618131867	Emx-Cre+;DGF/-	Emx-DG-cKO	Emx-DG	CUX1
10	JJ379	99.82927042349651	Emx-Cre+;DGF/-	Emx-DG-cKO	Emx-DG	CUX1
10	JJ380	173.27580890473848	Emx-Cre+;DGF/-	Emx-DG-cKO	Emx-DG	CUX1
10	JJ381	133.80117341875965	Emx-Cre+;DGF/-	Emx-DG-cKO	Emx-DG	CUX1
10	JJ386	14.713871628352498	Emx-Cre+;DGF/+	Emx-DG-Ctrl	Emx-DG	CUX1
10	JJ387	13.320598428024406	Emx-Cre+;DGF/+	Emx-DG-Ctrl	Emx-DG	CUX1
10	JJ388	94.13781784802039	Emx-Cre+;DGF/+	Emx-DG-Ctrl	Emx-DG	CUX1
10	JJ392	0.29662933970966304	Emx-Cre+;DGF/+	Emx-DG-Ctrl	Emx-DG	CUX1
10	JJ393	-15.522966429922045	Emx-Cre+;DGF/+	Emx-DG-Ctrl	Emx-DG	CUX1
10	JJ394	-12.713853543924492	Emx-Cre+;DGF/+	Emx-DG-Ctrl	Emx-DG	CUX1
10	JJ395	2.1942219240476484	Emx-Cre+;DGF/+	Emx-DG-Ctrl	Emx-DG	CUX1
11	JJ001	12.047363809523802	Emx-Cre+;POMT2F/+	Emx-POMT2-Ctrl	Emx-POMT2	CUX1
11	JJ002	1.410061772124796	Emx-Cre+;POMT2F/+	Emx-POMT2-Ctrl	Emx-POMT2	CUX1
11	JJ003	-6.6077811880341715	Emx-Cre+;POMT2F/+	Emx-POMT2-Ctrl	Emx-POMT2	CUX1
11	JJ004	0.5001828381012577	Emx-Cre+;POMT2F/F	Emx-POMT2-cKO	Emx-POMT2	CUX1
11	JJ005	12.16867103448275	Emx-Cre+;POMT2F/F	Emx-POMT2-cKO	Emx-POMT2	CUX1
11	JJ006	41.67252445463034	Emx-Cre+;POMT2F/F	Emx-POMT2-cKO	Emx-POMT2	CUX1
11	JJ007	1.2688763873155722	Emx-Cre+;POMT2F/+	Emx-POMT2-Ctrl	Emx-POMT2	CUX1
11	JJ008	28.191988368910774	Emx-Cre+;POMT2F/F	Emx-POMT2-cKO	Emx-POMT2	CUX1
11	JJ053	3.172771586550747	WT	B4GAT1-Ctrl	B4GAT1	CUX1
11	JJ054	26.141438922517068	WT	B4GAT1-Ctrl	B4GAT1	CUX1
11	JJ055	120.07178201025833	WT	B4GAT1-Ctrl	B4GAT1	CUX1
11	JJ056	24.463733137566084	WT	B4GAT1-Ctrl	B4GAT1	CUX1
11	JJ057	-13.267452177248686	B4GAT1M155T/M155T;Thy1	B4GAT1-Mutant	B4GAT1	CUX1
11	JJ058	33.33037617447608	B4GAT1M155T/M155T;Thy1	B4GAT1-Mutant	B4GAT1	CUX1
11	JJ059	46.95192647324188	B4GAT1M155T/M155T;Thy1	B4GAT1-Mutant	B4GAT1	CUX1
11	JJ060	45.625638516870616	B4GAT1M155T/M155T;Thy1	B4GAT1-Mutant	B4GAT1	CUX1
11	JJ069	7.801684705263862	B4GAT1M155T/M155T;Thy1	B4GAT1-Mutant	B4GAT1	CUX1
11	JJ070	70.63516873836886	B4GAT1M155T/M155T;Thy1	B4GAT1-Mutant	B4GAT1	CUX1
11	JJ071	94.87764833183117	B4GAT1M155T/M155T	B4GAT1-Mutant	B4GAT1	CUX1
11	JJ072	11.097855880519242	B4GAT1M155T/M155T	B4GAT1-Mutant	B4GAT1	CUX1
11	JJ073	11.588855294128544	B4GAT1M155T/M155T	B4GAT1-Mutant	B4GAT1	CUX1
11	JJ074	-5.004638951159943	B4GAT1M155T/M155T	B4GAT1-Mutant	B4GAT1	CUX1
11	JJ075	16.198950801879278	B4GAT1M155T/M155T;Thy1	B4GAT1-Mutant	B4GAT1	CUX1
11	JJ076	18.404264218951464	B4GAT1M155T/M155T;Thy1	B4GAT1-Mutant	B4GAT1	CUX1
11	JJ086	-7.259888183318632	B4GAT1M155T/M155T	B4GAT1-Mutant	B4GAT1	CUX1
11	JJ087	40.45157707066255	B4GAT1M155T/M155T	B4GAT1-Mutant	B4GAT1	CUX1
11	JJ088	-4.583900090659313	B4GAT1M155T/M155T	B4GAT1-Mutant	B4GAT1	CUX1
11	JJ089	-26.877750602640504	B4GAT1M155T/M155T	B4GAT1-Mutant	B4GAT1	CUX1
11	JJ090	47.26260398290602	B4GAT1M155T/M155T;Thy1	B4GAT1-Mutant	B4GAT1	CUX1
11	JJ091	53.07659029208215	B4GAT1M155T/M155T;Thy1	B4GAT1-Mutant	B4GAT1	CUX1
11	JJ092	-1.4838336580564828	B4GAT1M155T/M155T;Thy1	B4GAT1-Mutant	B4GAT1	CUX1
11	JJ093	-20.660866698232287	B4GAT1M155T/M155T;Thy1	B4GAT1-Mutant	B4GAT1	CUX1
11	JJ106	-6.3310178901415	WT	B4GAT1-Ctrl	B4GAT1	CUX1
11	JJ107	8.025763489370888	WT	B4GAT1-Ctrl	B4GAT1	CUX1
11	JJ108	-9.11827606515567	WT	B4GAT1-Ctrl	B4GAT1	CUX1
11	JJ109	18.641396077666286	WT	B4GAT1-Ctrl	B4GAT1	CUX1
11	JJ114	-12.305245135490054	WT	B4GAT1-Ctrl	B4GAT1	CUX1
11	JJ115	142.4293975911506	WT	B4GAT1-Ctrl	B4GAT1	CUX1
11	JJ116	-14.492089489291402	WT	B4GAT1-Ctrl	B4GAT1	CUX1
11	JJ117	44.64879571315388	WT	B4GAT1-Ctrl	B4GAT1	CUX1
11	JJ118	48.68981100419749	Emx-Cre+;DGF/-	Emx-DG-cKO	Emx-DG	CUX1
11	JJ119	39.37508386855372	Emx-Cre+;DGF/-	Emx-DG-cKO	Emx-DG	CUX1
11	JJ120	14.62111627753192	Emx-Cre+;DGF/-	Emx-DG-cKO	Emx-DG	CUX1
11	JJ121	1.5640333022193242	Emx-Cre+;DGF/-	Emx-DG-cKO	Emx-DG	CUX1
11	JJ126	74.37791096774195	Emx-Cre+;DGF/-	Emx-DG-cKO	Emx-DG	CUX1
11	JJ127	150.9082378829088	Emx-Cre+;DGF/-	Emx-DG-cKO	Emx-DG	CUX1
11	JJ128	49.03029642737865	Emx-Cre+;DGF/-	Emx-DG-cKO	Emx-DG	CUX1
11	JJ129	96.96853124870337	Emx-Cre+;DGF/-	Emx-DG-cKO	Emx-DG	CUX1
11	JJ138	4.464309493997973	Emx-Cre+;DGF/+	Emx-DG-Ctrl	Emx-DG	CUX1
11	JJ139	38.30195922910349	Emx-Cre+;DGF/+	Emx-DG-Ctrl	Emx-DG	CUX1
11	JJ140	-9.993725148296392	Emx-Cre+;DGF/+	Emx-DG-Ctrl	Emx-DG	CUX1
11	JJ141	-2.2519418697600977	Emx-Cre+;DGF/+	Emx-DG-Ctrl	Emx-DG	CUX1
11	JJ158	16.886213740037288	Emx-Cre+;POMT2F/F	Emx-POMT2-cKO	Emx-POMT2	CUX1
11	JJ159	83.74503450518417	Emx-Cre+;POMT2F/F	Emx-POMT2-cKO	Emx-POMT2	CUX1
11	JJ160	43.969562853952084	Emx-Cre+;POMT2F/F	Emx-POMT2-cKO	Emx-POMT2	CUX1
11	JJ161	97.16865879120503	Emx-Cre+;POMT2F/F	Emx-POMT2-cKO	Emx-POMT2	CUX1
11	JJ162	-84.87841362166075	Emx-Cre+;POMT2F/+	Emx-POMT2-Ctrl	Emx-POMT2	CUX1
11	JJ163	13.360157741492722	Emx-Cre+;POMT2F/+	Emx-POMT2-Ctrl	Emx-POMT2	CUX1
11	JJ164	-5.122517279693493	Emx-Cre+;POMT2F/+	Emx-POMT2-Ctrl	Emx-POMT2	CUX1
11	JJ165	-2.5019193110952074	Emx-Cre+;POMT2F/+	Emx-POMT2-Ctrl	Emx-POMT2	CUX1
11	JJ190	136.81708305489983	Emx-Cre+;POMT2F/F	Emx-POMT2-cKO	Emx-POMT2	CUX1
11	JJ191	42.10648363463264	Emx-Cre+;POMT2F/F	Emx-POMT2-cKO	Emx-POMT2	CUX1
11	JJ192	244.30070710395822	Emx-Cre+;POMT2F/F	Emx-POMT2-cKO	Emx-POMT2	CUX1
11	JJ193	34.02643840434706	Emx-Cre+;POMT2F/F	Emx-POMT2-cKO	Emx-POMT2	CUX1
11	JJ198	-5.623099050148596	Emx-Cre+;POMT2F/+	Emx-POMT2-Ctrl	Emx-POMT2	CUX1
11	JJ199	2.6158198761331164	Emx-Cre+;POMT2F/+	Emx-POMT2-Ctrl	Emx-POMT2	CUX1
11	JJ200	13.486017521404543	Emx-Cre+;POMT2F/+	Emx-POMT2-Ctrl	Emx-POMT2	CUX1
11	JJ201	0.973747176024176	Emx-Cre+;POMT2F/+	Emx-POMT2-Ctrl	Emx-POMT2	CUX1
11	JJ206	7.351034796725021	Emx-Cre+;POMT2F/+	Emx-POMT2-Ctrl	Emx-POMT2	CUX1
11	JJ207	18.944903926610834	Emx-Cre+;POMT2F/+	Emx-POMT2-Ctrl	Emx-POMT2	CUX1
11	JJ208	1.4447749788152275	Emx-Cre+;POMT2F/+	Emx-POMT2-Ctrl	Emx-POMT2	CUX1
11	JJ209	-7.074870246461198	Emx-Cre+;POMT2F/+	Emx-POMT2-Ctrl	Emx-POMT2	CUX1
11	JJ226	7.653641735531058	WT	ICD-Ctrl	ICD	CUX1
11	JJ227	1.1462211500310484	DGdelta/-	ICD-Mutant	ICD	CUX1
11	JJ228	-4.360478688391784	DGdelta/-	ICD-Mutant	ICD	CUX1
11	JJ229	3.173549217364515	DGdelta/-	ICD-Mutant	ICD	CUX1
11	JJ230	54.208575534466796	DGdelta/-	ICD-Mutant	ICD	CUX1
11	JJ235	8.760458252843287	WT	ICD-Ctrl	ICD	CUX1
11	JJ236	29.864752708237308	WT	ICD-Ctrl	ICD	CUX1
11	JJ237	-23.23170980380951	WT	ICD-Ctrl	ICD	CUX1
11	JJ258	3.1831468809258974	FKRPMut	FKRP-Mutant	FKRP	CUX1
11	JJ259	4.309411554727401	FKRPMut	FKRP-Mutant	FKRP	CUX1
11	JJ260	1.7659052826086912	FKRPMut	FKRP-Mutant	FKRP	CUX1
11	JJ261	8.520963662897064	FKRPMut	FKRP-Mutant	FKRP	CUX1
11	JJ262	8.04036503426524	WT	FKRP-Ctrl	FKRP	CUX1
11	JJ263	-2.0103891358375754	WT	FKRP-Ctrl	FKRP	CUX1
11	JJ264	21.557719784480874	WT	FKRP-Ctrl	FKRP	CUX1
11	JJ265	20.007342218449367	WT	FKRP-Ctrl	FKRP	CUX1
11	JJ266	-2.0457175448214633	WT	FKRP-Ctrl	FKRP	CUX1
11	JJ267	-28.68549917997234	WT	FKRP-Ctrl	FKRP	CUX1
11	JJ268	-13.88195818663352	WT	FKRP-Ctrl	FKRP	CUX1
11	JJ269	11.521066506964367	WT	FKRP-Ctrl	FKRP	CUX1
11	JJ270	3.9898145906932743	FKRPMut	FKRP-Mutant	FKRP	CUX1
11	JJ271	-12.198925927468078	FKRPMut	FKRP-Mutant	FKRP	CUX1
11	JJ272	32.60442578080535	FKRPMut	FKRP-Mutant	FKRP	CUX1
11	JJ273	-6.902422379370212	FKRPMut	FKRP-Mutant	FKRP	CUX1
11	JJ274	-0.7059573716637146	WT	FKRP-Ctrl	FKRP	CUX1
11	JJ275	75.53637390729439	WT	FKRP-Ctrl	FKRP	CUX1
11	JJ276	2.6334346545414555	WT	FKRP-Ctrl	FKRP	CUX1
11	JJ277	-4.337300824653842	WT	FKRP-Ctrl	FKRP	CUX1
11	JJ306	-9.645752784531586	DGdelta/-	ICD-Mutant	ICD	CUX1
11	JJ307	6.22893188569185	DGdelta/-	ICD-Mutant	ICD	CUX1
11	JJ308	5.840106507652952	DGdelta/-	ICD-Mutant	ICD	CUX1
11	JJ309	4.064692566364101	DGdelta/-	ICD-Mutant	ICD	CUX1
11	JJ314	67.64077934086542	DGdelta/-	ICD-Mutant	ICD	CUX1
11	JJ315	74.85518107567088	DGdelta/-	ICD-Mutant	ICD	CUX1
11	JJ316	16.51040431764981	DGdelta/-	ICD-Mutant	ICD	CUX1
11	JJ317	-6.3636462334766675	DGdelta/-	ICD-Mutant	ICD	CUX1
11	JJ322	59.201232259022504	WT	ICD-Ctrl	ICD	CUX1
11	JJ323	36.41947253455552	WT	ICD-Ctrl	ICD	CUX1
11	JJ324	0.012360828259867654	WT	ICD-Ctrl	ICD	CUX1
11	JJ325	-19.994288104121967	WT	ICD-Ctrl	ICD	CUX1
11	JJ330	-17.110337234537496	WT	ICD-Ctrl	ICD	CUX1
11	JJ331	40.44970301793668	WT	ICD-Ctrl	ICD	CUX1
11	JJ332	59.04403770207572	WT	ICD-Ctrl	ICD	CUX1
11	JJ333	-8.717791106637492	WT	ICD-Ctrl	ICD	CUX1
11	JJ346	53.480458988624946	FKRPMut	FKRP-Mutant	FKRP	CUX1
11	JJ347	23.41410140749603	FKRPMut	FKRP-Mutant	FKRP	CUX1
11	JJ348	186.28407199468862	FKRPMut	FKRP-Mutant	FKRP	CUX1
11	JJ349	-12.495782565808554	FKRPMut	FKRP-Mutant	FKRP	CUX1
11	JJ350	17.205310166366758	WT	FKRP-Ctrl	FKRP	CUX1
11	JJ351	78.65076040551533	WT	FKRP-Ctrl	FKRP	CUX1
11	JJ352	40.63953938318722	WT	FKRP-Ctrl	FKRP	CUX1
11	JJ353	0.8345530924120794	WT	FKRP-Ctrl	FKRP	CUX1
11	JJ354	262.35798504680736	Emx-Cre+;DGF/-	Emx-DG-cKO	Emx-DG	CUX1
11	JJ355	122.14096545417745	Emx-Cre+;DGF/-	Emx-DG-cKO	Emx-DG	CUX1
11	JJ356	327.33242227000454	Emx-Cre+;DGF/-	Emx-DG-cKO	Emx-DG	CUX1
11	JJ357	65.56994405748257	Emx-Cre+;DGF/-	Emx-DG-cKO	Emx-DG	CUX1
11	JJ362	26.98656187262145	Emx-Cre+;DGF/+	Emx-DG-Ctrl	Emx-DG	CUX1
11	JJ363	-28.75842378954034	Emx-Cre+;DGF/+	Emx-DG-Ctrl	Emx-DG	CUX1
11	JJ364	14.535916493342029	Emx-Cre+;DGF/+	Emx-DG-Ctrl	Emx-DG	CUX1
11	JJ365	-16.10654748279137	Emx-Cre+;DGF/+	Emx-DG-Ctrl	Emx-DG	CUX1
11	JJ370	165.71149356651247	Emx-Cre+;DGF/-	Emx-DG-cKO	Emx-DG	CUX1
11	JJ371	157.24954032509967	Emx-Cre+;DGF/-	Emx-DG-cKO	Emx-DG	CUX1
11	JJ372	360.1456962272085	Emx-Cre+;DGF/-	Emx-DG-cKO	Emx-DG	CUX1
11	JJ373	146.8460503705013	Emx-Cre+;DGF/-	Emx-DG-cKO	Emx-DG	CUX1
11	JJ378	193.82358614333194	Emx-Cre+;DGF/-	Emx-DG-cKO	Emx-DG	CUX1
11	JJ379	74.62476979954941	Emx-Cre+;DGF/-	Emx-DG-cKO	Emx-DG	CUX1
11	JJ380	155.89635572128262	Emx-Cre+;DGF/-	Emx-DG-cKO	Emx-DG	CUX1
11	JJ381	152.41494037931346	Emx-Cre+;DGF/-	Emx-DG-cKO	Emx-DG	CUX1
11	JJ386	47.997423735632196	Emx-Cre+;DGF/+	Emx-DG-Ctrl	Emx-DG	CUX1
11	JJ387	27.115886118184637	Emx-Cre+;DGF/+	Emx-DG-Ctrl	Emx-DG	CUX1
11	JJ388	33.91025401070831	Emx-Cre+;DGF/+	Emx-DG-Ctrl	Emx-DG	CUX1
11	JJ392	12.341733808574153	Emx-Cre+;DGF/+	Emx-DG-Ctrl	Emx-DG	CUX1
11	JJ393	-11.685792327615331	Emx-Cre+;DGF/+	Emx-DG-Ctrl	Emx-DG	CUX1
11	JJ394	21.620969768731396	Emx-Cre+;DGF/+	Emx-DG-Ctrl	Emx-DG	CUX1
11	JJ395	5.434876664882343	Emx-Cre+;DGF/+	Emx-DG-Ctrl	Emx-DG	CUX1
12	JJ001	8.843922557319218	Emx-Cre+;POMT2F/+	Emx-POMT2-Ctrl	Emx-POMT2	CUX1
12	JJ002	14.223707835133192	Emx-Cre+;POMT2F/+	Emx-POMT2-Ctrl	Emx-POMT2	CUX1
12	JJ003	-6.085470171889843	Emx-Cre+;POMT2F/+	Emx-POMT2-Ctrl	Emx-POMT2	CUX1
12	JJ004	12.085278104420183	Emx-Cre+;POMT2F/F	Emx-POMT2-cKO	Emx-POMT2	CUX1
12	JJ005	32.24649938697318	Emx-Cre+;POMT2F/F	Emx-POMT2-cKO	Emx-POMT2	CUX1
12	JJ006	18.797317103811224	Emx-Cre+;POMT2F/F	Emx-POMT2-cKO	Emx-POMT2	CUX1
12	JJ007	8.080992366151577	Emx-Cre+;POMT2F/+	Emx-POMT2-Ctrl	Emx-POMT2	CUX1
12	JJ008	93.55500469804782	Emx-Cre+;POMT2F/F	Emx-POMT2-cKO	Emx-POMT2	CUX1
12	JJ053	9.91436199736387	WT	B4GAT1-Ctrl	B4GAT1	CUX1
12	JJ054	39.733627179308634	WT	B4GAT1-Ctrl	B4GAT1	CUX1
12	JJ055	106.7483422623903	WT	B4GAT1-Ctrl	B4GAT1	CUX1
12	JJ056	22.9027502315832	WT	B4GAT1-Ctrl	B4GAT1	CUX1
12	JJ057	16.19897629107311	B4GAT1M155T/M155T;Thy1	B4GAT1-Mutant	B4GAT1	CUX1
12	JJ058	87.50293029051568	B4GAT1M155T/M155T;Thy1	B4GAT1-Mutant	B4GAT1	CUX1
12	JJ059	59.089963032381696	B4GAT1M155T/M155T;Thy1	B4GAT1-Mutant	B4GAT1	CUX1
12	JJ060	51.372223302434804	B4GAT1M155T/M155T;Thy1	B4GAT1-Mutant	B4GAT1	CUX1
12	JJ069	4.518662286324836	B4GAT1M155T/M155T;Thy1	B4GAT1-Mutant	B4GAT1	CUX1
12	JJ070	74.29245679034905	B4GAT1M155T/M155T;Thy1	B4GAT1-Mutant	B4GAT1	CUX1
12	JJ071	92.47352893914656	B4GAT1M155T/M155T	B4GAT1-Mutant	B4GAT1	CUX1
12	JJ072	19.735348749920377	B4GAT1M155T/M155T	B4GAT1-Mutant	B4GAT1	CUX1
12	JJ073	22.289312274804843	B4GAT1M155T/M155T	B4GAT1-Mutant	B4GAT1	CUX1
12	JJ074	11.740730211097533	B4GAT1M155T/M155T	B4GAT1-Mutant	B4GAT1	CUX1
12	JJ075	26.380011587036165	B4GAT1M155T/M155T;Thy1	B4GAT1-Mutant	B4GAT1	CUX1
12	JJ076	8.796031742796382	B4GAT1M155T/M155T;Thy1	B4GAT1-Mutant	B4GAT1	CUX1
12	JJ086	6.8097791833185966	B4GAT1M155T/M155T	B4GAT1-Mutant	B4GAT1	CUX1
12	JJ087	29.60796663561655	B4GAT1M155T/M155T	B4GAT1-Mutant	B4GAT1	CUX1
12	JJ088	16.191059616300397	B4GAT1M155T/M155T	B4GAT1-Mutant	B4GAT1	CUX1
12	JJ089	-40.15170313621809	B4GAT1M155T/M155T	B4GAT1-Mutant	B4GAT1	CUX1
12	JJ090	46.62240601519469	B4GAT1M155T/M155T;Thy1	B4GAT1-Mutant	B4GAT1	CUX1
12	JJ091	89.8375914715081	B4GAT1M155T/M155T;Thy1	B4GAT1-Mutant	B4GAT1	CUX1
12	JJ092	44.31881644767001	B4GAT1M155T/M155T;Thy1	B4GAT1-Mutant	B4GAT1	CUX1
12	JJ093	-21.076091445707032	B4GAT1M155T/M155T;Thy1	B4GAT1-Mutant	B4GAT1	CUX1
12	JJ106	26.064647308797475	WT	B4GAT1-Ctrl	B4GAT1	CUX1
12	JJ107	24.546549622110962	WT	B4GAT1-Ctrl	B4GAT1	CUX1
12	JJ108	-10.878978384801448	WT	B4GAT1-Ctrl	B4GAT1	CUX1
12	JJ109	28.695230769024306	WT	B4GAT1-Ctrl	B4GAT1	CUX1
12	JJ114	30.35007518901068	WT	B4GAT1-Ctrl	B4GAT1	CUX1
12	JJ115	232.27116469039666	WT	B4GAT1-Ctrl	B4GAT1	CUX1
12	JJ116	-4.306798739428284	WT	B4GAT1-Ctrl	B4GAT1	CUX1
12	JJ117	19.11611795460188	WT	B4GAT1-Ctrl	B4GAT1	CUX1
12	JJ118	23.778470455245174	Emx-Cre+;DGF/-	Emx-DG-cKO	Emx-DG	CUX1
12	JJ119	83.94270514546031	Emx-Cre+;DGF/-	Emx-DG-cKO	Emx-DG	CUX1
12	JJ120	35.261411084117015	Emx-Cre+;DGF/-	Emx-DG-cKO	Emx-DG	CUX1
12	JJ121	6.856146434067739	Emx-Cre+;DGF/-	Emx-DG-cKO	Emx-DG	CUX1
12	JJ126	151.3871830107527	Emx-Cre+;DGF/-	Emx-DG-cKO	Emx-DG	CUX1
12	JJ127	214.95662986726856	Emx-Cre+;DGF/-	Emx-DG-cKO	Emx-DG	CUX1
12	JJ128	99.61304671859727	Emx-Cre+;DGF/-	Emx-DG-cKO	Emx-DG	CUX1
12	JJ129	84.31824884436242	Emx-Cre+;DGF/-	Emx-DG-cKO	Emx-DG	CUX1
12	JJ138	-2.360981705328451	Emx-Cre+;DGF/+	Emx-DG-Ctrl	Emx-DG	CUX1
12	JJ139	24.801878798383274	Emx-Cre+;DGF/+	Emx-DG-Ctrl	Emx-DG	CUX1
12	JJ140	-6.437836397652461	Emx-Cre+;DGF/+	Emx-DG-Ctrl	Emx-DG	CUX1
12	JJ141	5.1185637431396644	Emx-Cre+;DGF/+	Emx-DG-Ctrl	Emx-DG	CUX1
12	JJ158	31.186484387690296	Emx-Cre+;POMT2F/F	Emx-POMT2-cKO	Emx-POMT2	CUX1
12	JJ159	99.13925068128208	Emx-Cre+;POMT2F/F	Emx-POMT2-cKO	Emx-POMT2	CUX1
12	JJ160	46.17046799366924	Emx-Cre+;POMT2F/F	Emx-POMT2-cKO	Emx-POMT2	CUX1
12	JJ161	118.22260081561588	Emx-Cre+;POMT2F/F	Emx-POMT2-cKO	Emx-POMT2	CUX1
12	JJ162	-37.118947338135854	Emx-Cre+;POMT2F/+	Emx-POMT2-Ctrl	Emx-POMT2	CUX1
12	JJ163	7.3386894824992055	Emx-Cre+;POMT2F/+	Emx-POMT2-Ctrl	Emx-POMT2	CUX1
12	JJ164	-9.325368892596734	Emx-Cre+;POMT2F/+	Emx-POMT2-Ctrl	Emx-POMT2	CUX1
12	JJ165	3.8430223251143425	Emx-Cre+;POMT2F/+	Emx-POMT2-Ctrl	Emx-POMT2	CUX1
12	JJ190	107.02677490843337	Emx-Cre+;POMT2F/F	Emx-POMT2-cKO	Emx-POMT2	CUX1
12	JJ191	138.0881518795821	Emx-Cre+;POMT2F/F	Emx-POMT2-cKO	Emx-POMT2	CUX1
12	JJ192	261.6578470236809	Emx-Cre+;POMT2F/F	Emx-POMT2-cKO	Emx-POMT2	CUX1
12	JJ193	18.570065133210658	Emx-Cre+;POMT2F/F	Emx-POMT2-cKO	Emx-POMT2	CUX1
12	JJ198	3.6352832812854103	Emx-Cre+;POMT2F/+	Emx-POMT2-Ctrl	Emx-POMT2	CUX1
12	JJ199	35.61306141545799	Emx-Cre+;POMT2F/+	Emx-POMT2-Ctrl	Emx-POMT2	CUX1
12	JJ200	9.233474902356912	Emx-Cre+;POMT2F/+	Emx-POMT2-Ctrl	Emx-POMT2	CUX1
12	JJ201	-1.0698743624373794	Emx-Cre+;POMT2F/+	Emx-POMT2-Ctrl	Emx-POMT2	CUX1
12	JJ206	13.720970583160826	Emx-Cre+;POMT2F/+	Emx-POMT2-Ctrl	Emx-POMT2	CUX1
12	JJ207	-3.720379458482322	Emx-Cre+;POMT2F/+	Emx-POMT2-Ctrl	Emx-POMT2	CUX1
12	JJ208	17.435601461499232	Emx-Cre+;POMT2F/+	Emx-POMT2-Ctrl	Emx-POMT2	CUX1
12	JJ209	12.2908560560806	Emx-Cre+;POMT2F/+	Emx-POMT2-Ctrl	Emx-POMT2	CUX1
12	JJ226	20.839463506193358	WT	ICD-Ctrl	ICD	CUX1
12	JJ227	-15.230475728531852	DGdelta/-	ICD-Mutant	ICD	CUX1
12	JJ228	43.73867276541754	DGdelta/-	ICD-Mutant	ICD	CUX1
12	JJ229	23.627177254882515	DGdelta/-	ICD-Mutant	ICD	CUX1
12	JJ230	52.86469932726815	DGdelta/-	ICD-Mutant	ICD	CUX1
12	JJ235	3.5937163018490614	WT	ICD-Ctrl	ICD	CUX1
12	JJ236	22.12946418097158	WT	ICD-Ctrl	ICD	CUX1
12	JJ237	-5.565125641444865	WT	ICD-Ctrl	ICD	CUX1
12	JJ258	18.217347644560974	FKRPMut	FKRP-Mutant	FKRP	CUX1
12	JJ259	1.8686907960655061	FKRPMut	FKRP-Mutant	FKRP	CUX1
12	JJ260	21.573058535426746	FKRPMut	FKRP-Mutant	FKRP	CUX1
12	JJ261	10.742347812362734	FKRPMut	FKRP-Mutant	FKRP	CUX1
12	JJ262	34.52316527834851	WT	FKRP-Ctrl	FKRP	CUX1
12	JJ263	14.000108758403124	WT	FKRP-Ctrl	FKRP	CUX1
12	JJ264	18.271084315917417	WT	FKRP-Ctrl	FKRP	CUX1
12	JJ265	38.588073630563805	WT	FKRP-Ctrl	FKRP	CUX1
12	JJ266	10.067666794173167	WT	FKRP-Ctrl	FKRP	CUX1
12	JJ267	1.1521112699102598	WT	FKRP-Ctrl	FKRP	CUX1
12	JJ268	2.5779937958561354	WT	FKRP-Ctrl	FKRP	CUX1
12	JJ269	44.048234397417474	WT	FKRP-Ctrl	FKRP	CUX1
12	JJ270	4.793972969927192	FKRPMut	FKRP-Mutant	FKRP	CUX1
12	JJ271	-12.536375398173883	FKRPMut	FKRP-Mutant	FKRP	CUX1
12	JJ272	26.73866729227383	FKRPMut	FKRP-Mutant	FKRP	CUX1
12	JJ273	8.74172914352861	FKRPMut	FKRP-Mutant	FKRP	CUX1
12	JJ274	6.130414080511002	WT	FKRP-Ctrl	FKRP	CUX1
12	JJ275	140.5229712042004	WT	FKRP-Ctrl	FKRP	CUX1
12	JJ276	-11.781768484788321	WT	FKRP-Ctrl	FKRP	CUX1
12	JJ277	-14.034744490841584	WT	FKRP-Ctrl	FKRP	CUX1
12	JJ306	50.98023909713743	DGdelta/-	ICD-Mutant	ICD	CUX1
12	JJ307	26.129545394175732	DGdelta/-	ICD-Mutant	ICD	CUX1
12	JJ308	0.061004483134297516	DGdelta/-	ICD-Mutant	ICD	CUX1
12	JJ309	-12.020124895696123	DGdelta/-	ICD-Mutant	ICD	CUX1
12	JJ314	19.981620157943098	DGdelta/-	ICD-Mutant	ICD	CUX1
12	JJ315	96.50199191387753	DGdelta/-	ICD-Mutant	ICD	CUX1
12	JJ316	21.112048318744502	DGdelta/-	ICD-Mutant	ICD	CUX1
12	JJ317	13.043492080302977	DGdelta/-	ICD-Mutant	ICD	CUX1
12	JJ322	112.1414934838022	WT	ICD-Ctrl	ICD	CUX1
12	JJ323	44.56642799688283	WT	ICD-Ctrl	ICD	CUX1
12	JJ324	52.34443358394549	WT	ICD-Ctrl	ICD	CUX1
12	JJ325	6.681317065344577	WT	ICD-Ctrl	ICD	CUX1
12	JJ330	-3.5574721551724147	WT	ICD-Ctrl	ICD	CUX1
12	JJ331	33.043070784491114	WT	ICD-Ctrl	ICD	CUX1
12	JJ332	-20.874637501073607	WT	ICD-Ctrl	ICD	CUX1
12	JJ333	-16.960789726375236	WT	ICD-Ctrl	ICD	CUX1
12	JJ346	87.3225611719489	FKRPMut	FKRP-Mutant	FKRP	CUX1
12	JJ347	62.86047053238334	FKRPMut	FKRP-Mutant	FKRP	CUX1
12	JJ348	167.9122570421157	FKRPMut	FKRP-Mutant	FKRP	CUX1
12	JJ349	-11.889298661210773	FKRPMut	FKRP-Mutant	FKRP	CUX1
12	JJ350	15.813403613660208	WT	FKRP-Ctrl	FKRP	CUX1
12	JJ351	-2.716240396610791	WT	FKRP-Ctrl	FKRP	CUX1
12	JJ352	6.737442631902923	WT	FKRP-Ctrl	FKRP	CUX1
12	JJ353	-3.0730349885474197	WT	FKRP-Ctrl	FKRP	CUX1
12	JJ354	260.1805390018338	Emx-Cre+;DGF/-	Emx-DG-cKO	Emx-DG	CUX1
12	JJ355	189.85554198535237	Emx-Cre+;DGF/-	Emx-DG-cKO	Emx-DG	CUX1
12	JJ356	314.02776460407944	Emx-Cre+;DGF/-	Emx-DG-cKO	Emx-DG	CUX1
12	JJ357	85.20820160571827	Emx-Cre+;DGF/-	Emx-DG-cKO	Emx-DG	CUX1
12	JJ362	11.439857890525937	Emx-Cre+;DGF/+	Emx-DG-Ctrl	Emx-DG	CUX1
12	JJ363	-8.747113791744937	Emx-Cre+;DGF/+	Emx-DG-Ctrl	Emx-DG	CUX1
12	JJ364	18.747091523483693	Emx-Cre+;DGF/+	Emx-DG-Ctrl	Emx-DG	CUX1
12	JJ365	-21.224209824868183	Emx-Cre+;DGF/+	Emx-DG-Ctrl	Emx-DG	CUX1
12	JJ370	186.8739999565685	Emx-Cre+;DGF/-	Emx-DG-cKO	Emx-DG	CUX1
12	JJ371	168.6398784118496	Emx-Cre+;DGF/-	Emx-DG-cKO	Emx-DG	CUX1
12	JJ372	290.65993007636547	Emx-Cre+;DGF/-	Emx-DG-cKO	Emx-DG	CUX1
12	JJ373	185.7502843953375	Emx-Cre+;DGF/-	Emx-DG-cKO	Emx-DG	CUX1
12	JJ378	69.3741621072446	Emx-Cre+;DGF/-	Emx-DG-cKO	Emx-DG	CUX1
12	JJ379	124.6408670402907	Emx-Cre+;DGF/-	Emx-DG-cKO	Emx-DG	CUX1
12	JJ380	281.76019244560695	Emx-Cre+;DGF/-	Emx-DG-cKO	Emx-DG	CUX1
12	JJ381	127.9415891227826	Emx-Cre+;DGF/-	Emx-DG-cKO	Emx-DG	CUX1
12	JJ386	17.07998657088122	Emx-Cre+;DGF/+	Emx-DG-Ctrl	Emx-DG	CUX1
12	JJ387	35.62492844622697	Emx-Cre+;DGF/+	Emx-DG-Ctrl	Emx-DG	CUX1
12	JJ388	37.830936592494346	Emx-Cre+;DGF/+	Emx-DG-Ctrl	Emx-DG	CUX1
12	JJ392	12.466239721611714	Emx-Cre+;DGF/+	Emx-DG-Ctrl	Emx-DG	CUX1
12	JJ393	0.9368610242609066	Emx-Cre+;DGF/+	Emx-DG-Ctrl	Emx-DG	CUX1
12	JJ394	-0.3177744549504193	Emx-Cre+;DGF/+	Emx-DG-Ctrl	Emx-DG	CUX1
12	JJ395	8.684868823931007	Emx-Cre+;DGF/+	Emx-DG-Ctrl	Emx-DG	CUX1
13	JJ001	2.7117654673721368	Emx-Cre+;POMT2F/+	Emx-POMT2-Ctrl	Emx-POMT2	CUX1
13	JJ002	33.18385112468047	Emx-Cre+;POMT2F/+	Emx-POMT2-Ctrl	Emx-POMT2	CUX1
13	JJ003	2.1739571785375156	Emx-Cre+;POMT2F/+	Emx-POMT2-Ctrl	Emx-POMT2	CUX1
13	JJ004	18.360639544807952	Emx-Cre+;POMT2F/F	Emx-POMT2-cKO	Emx-POMT2	CUX1
13	JJ005	31.695999003831407	Emx-Cre+;POMT2F/F	Emx-POMT2-cKO	Emx-POMT2	CUX1
13	JJ006	20.039230727442504	Emx-Cre+;POMT2F/F	Emx-POMT2-cKO	Emx-POMT2	CUX1
13	JJ007	16.4581942953335	Emx-Cre+;POMT2F/+	Emx-POMT2-Ctrl	Emx-POMT2	CUX1
13	JJ008	117.98517226175271	Emx-Cre+;POMT2F/F	Emx-POMT2-cKO	Emx-POMT2	CUX1
13	JJ053	25.40865145605335	WT	B4GAT1-Ctrl	B4GAT1	CUX1
13	JJ054	48.94342214762531	WT	B4GAT1-Ctrl	B4GAT1	CUX1
13	JJ055	120.81201043690517	WT	B4GAT1-Ctrl	B4GAT1	CUX1
13	JJ056	31.676312909645883	WT	B4GAT1-Ctrl	B4GAT1	CUX1
13	JJ057	8.566574899131732	B4GAT1M155T/M155T;Thy1	B4GAT1-Mutant	B4GAT1	CUX1
13	JJ058	44.19021060769717	B4GAT1M155T/M155T;Thy1	B4GAT1-Mutant	B4GAT1	CUX1
13	JJ059	38.43145239092818	B4GAT1M155T/M155T;Thy1	B4GAT1-Mutant	B4GAT1	CUX1
13	JJ060	42.015410980101365	B4GAT1M155T/M155T;Thy1	B4GAT1-Mutant	B4GAT1	CUX1
13	JJ069	23.799678600257796	B4GAT1M155T/M155T;Thy1	B4GAT1-Mutant	B4GAT1	CUX1
13	JJ070	59.52885081280787	B4GAT1M155T/M155T;Thy1	B4GAT1-Mutant	B4GAT1	CUX1
13	JJ071	76.02276164605318	B4GAT1M155T/M155T	B4GAT1-Mutant	B4GAT1	CUX1
13	JJ072	63.4926629656563	B4GAT1M155T/M155T	B4GAT1-Mutant	B4GAT1	CUX1
13	JJ073	23.627923627461882	B4GAT1M155T/M155T	B4GAT1-Mutant	B4GAT1	CUX1
13	JJ074	26.657448520010842	B4GAT1M155T/M155T	B4GAT1-Mutant	B4GAT1	CUX1
13	JJ075	57.836351635345295	B4GAT1M155T/M155T;Thy1	B4GAT1-Mutant	B4GAT1	CUX1
13	JJ076	13.675278226548812	B4GAT1M155T/M155T;Thy1	B4GAT1-Mutant	B4GAT1	CUX1
13	JJ086	35.11787204361921	B4GAT1M155T/M155T	B4GAT1-Mutant	B4GAT1	CUX1
13	JJ087	62.146964370214846	B4GAT1M155T/M155T	B4GAT1-Mutant	B4GAT1	CUX1
13	JJ088	16.64723125854702	B4GAT1M155T/M155T	B4GAT1-Mutant	B4GAT1	CUX1
13	JJ089	-8.652453594093496	B4GAT1M155T/M155T	B4GAT1-Mutant	B4GAT1	CUX1
13	JJ090	58.99029577777776	B4GAT1M155T/M155T;Thy1	B4GAT1-Mutant	B4GAT1	CUX1
13	JJ091	68.56520491083654	B4GAT1M155T/M155T;Thy1	B4GAT1-Mutant	B4GAT1	CUX1
13	JJ092	41.79471986717518	B4GAT1M155T/M155T;Thy1	B4GAT1-Mutant	B4GAT1	CUX1
13	JJ093	-13.815216761363635	B4GAT1M155T/M155T;Thy1	B4GAT1-Mutant	B4GAT1	CUX1
13	JJ106	34.44180342105479	WT	B4GAT1-Ctrl	B4GAT1	CUX1
13	JJ107	54.39676052311207	WT	B4GAT1-Ctrl	B4GAT1	CUX1
13	JJ108	-10.629731880258873	WT	B4GAT1-Ctrl	B4GAT1	CUX1
13	JJ109	36.94055041744085	WT	B4GAT1-Ctrl	B4GAT1	CUX1
13	JJ114	14.049809363997914	WT	B4GAT1-Ctrl	B4GAT1	CUX1
13	JJ115	205.17191751452228	WT	B4GAT1-Ctrl	B4GAT1	CUX1
13	JJ116	39.32978752220284	WT	B4GAT1-Ctrl	B4GAT1	CUX1
13	JJ117	27.141526364494855	WT	B4GAT1-Ctrl	B4GAT1	CUX1
13	JJ118	51.40782950715421	Emx-Cre+;DGF/-	Emx-DG-cKO	Emx-DG	CUX1
13	JJ119	91.03271274921788	Emx-Cre+;DGF/-	Emx-DG-cKO	Emx-DG	CUX1
13	JJ120	29.163685761161293	Emx-Cre+;DGF/-	Emx-DG-cKO	Emx-DG	CUX1
13	JJ121	36.885550910736924	Emx-Cre+;DGF/-	Emx-DG-cKO	Emx-DG	CUX1
13	JJ126	215.35616186379926	Emx-Cre+;DGF/-	Emx-DG-cKO	Emx-DG	CUX1
13	JJ127	185.12078535765627	Emx-Cre+;DGF/-	Emx-DG-cKO	Emx-DG	CUX1
13	JJ128	145.16260394815086	Emx-Cre+;DGF/-	Emx-DG-cKO	Emx-DG	CUX1
13	JJ129	77.1152780964916	Emx-Cre+;DGF/-	Emx-DG-cKO	Emx-DG	CUX1
13	JJ138	12.309900370434756	Emx-Cre+;DGF/+	Emx-DG-Ctrl	Emx-DG	CUX1
13	JJ139	17.67891303236911	Emx-Cre+;DGF/+	Emx-DG-Ctrl	Emx-DG	CUX1
13	JJ140	-2.568887984954017	Emx-Cre+;DGF/+	Emx-DG-Ctrl	Emx-DG	CUX1
13	JJ141	-0.1143277824585122	Emx-Cre+;DGF/+	Emx-DG-Ctrl	Emx-DG	CUX1
13	JJ158	43.45482789989139	Emx-Cre+;POMT2F/F	Emx-POMT2-cKO	Emx-POMT2	CUX1
13	JJ159	75.72596276289572	Emx-Cre+;POMT2F/F	Emx-POMT2-cKO	Emx-POMT2	CUX1
13	JJ160	75.44652931109944	Emx-Cre+;POMT2F/F	Emx-POMT2-cKO	Emx-POMT2	CUX1
13	JJ161	158.4507858324508	Emx-Cre+;POMT2F/F	Emx-POMT2-cKO	Emx-POMT2	CUX1
13	JJ162	16.922551074562552	Emx-Cre+;POMT2F/+	Emx-POMT2-Ctrl	Emx-POMT2	CUX1
13	JJ163	5.289056381957418	Emx-Cre+;POMT2F/+	Emx-POMT2-Ctrl	Emx-POMT2	CUX1
13	JJ164	7.332255826226647	Emx-Cre+;POMT2F/+	Emx-POMT2-Ctrl	Emx-POMT2	CUX1
13	JJ165	12.123061641285725	Emx-Cre+;POMT2F/+	Emx-POMT2-Ctrl	Emx-POMT2	CUX1
13	JJ190	135.57224956281124	Emx-Cre+;POMT2F/F	Emx-POMT2-cKO	Emx-POMT2	CUX1
13	JJ191	194.87659253614774	Emx-Cre+;POMT2F/F	Emx-POMT2-cKO	Emx-POMT2	CUX1
13	JJ192	268.80961516513923	Emx-Cre+;POMT2F/F	Emx-POMT2-cKO	Emx-POMT2	CUX1
13	JJ193	28.69721279531558	Emx-Cre+;POMT2F/F	Emx-POMT2-cKO	Emx-POMT2	CUX1
13	JJ198	1.738884710535179	Emx-Cre+;POMT2F/+	Emx-POMT2-Ctrl	Emx-POMT2	CUX1
13	JJ199	51.543158119679696	Emx-Cre+;POMT2F/+	Emx-POMT2-Ctrl	Emx-POMT2	CUX1
13	JJ200	10.140527318582656	Emx-Cre+;POMT2F/+	Emx-POMT2-Ctrl	Emx-POMT2	CUX1
13	JJ201	-3.182373129015616	Emx-Cre+;POMT2F/+	Emx-POMT2-Ctrl	Emx-POMT2	CUX1
13	JJ206	22.431472026162265	Emx-Cre+;POMT2F/+	Emx-POMT2-Ctrl	Emx-POMT2	CUX1
13	JJ207	-4.856750521284273	Emx-Cre+;POMT2F/+	Emx-POMT2-Ctrl	Emx-POMT2	CUX1
13	JJ208	19.282685648007146	Emx-Cre+;POMT2F/+	Emx-POMT2-Ctrl	Emx-POMT2	CUX1
13	JJ209	23.927807887091074	Emx-Cre+;POMT2F/+	Emx-POMT2-Ctrl	Emx-POMT2	CUX1
13	JJ226	-13.160592254616745	WT	ICD-Ctrl	ICD	CUX1
13	JJ227	-10.222756604057318	DGdelta/-	ICD-Mutant	ICD	CUX1
13	JJ228	44.86950020990287	DGdelta/-	ICD-Mutant	ICD	CUX1
13	JJ229	33.19796703235651	DGdelta/-	ICD-Mutant	ICD	CUX1
13	JJ230	64.94546746975372	DGdelta/-	ICD-Mutant	ICD	CUX1
13	JJ235	15.19009674988259	WT	ICD-Ctrl	ICD	CUX1
13	JJ236	16.27358000278419	WT	ICD-Ctrl	ICD	CUX1
13	JJ237	2.511502591194926	WT	ICD-Ctrl	ICD	CUX1
13	JJ258	29.3801119476373	FKRPMut	FKRP-Mutant	FKRP	CUX1
13	JJ259	15.32657350623169	FKRPMut	FKRP-Mutant	FKRP	CUX1
13	JJ260	32.04404885748792	FKRPMut	FKRP-Mutant	FKRP	CUX1
13	JJ261	31.848046081283858	FKRPMut	FKRP-Mutant	FKRP	CUX1
13	JJ262	18.760047842357494	WT	FKRP-Ctrl	FKRP	CUX1
13	JJ263	57.99712414488979	WT	FKRP-Ctrl	FKRP	CUX1
13	JJ264	33.83950791017877	WT	FKRP-Ctrl	FKRP	CUX1
13	JJ265	38.81234421677711	WT	FKRP-Ctrl	FKRP	CUX1
13	JJ266	29.54178079852689	WT	FKRP-Ctrl	FKRP	CUX1
13	JJ267	17.54961575019699	WT	FKRP-Ctrl	FKRP	CUX1
13	JJ268	39.924475986976304	WT	FKRP-Ctrl	FKRP	CUX1
13	JJ269	72.57762273632083	WT	FKRP-Ctrl	FKRP	CUX1
13	JJ270	2.917231874643878	FKRPMut	FKRP-Mutant	FKRP	CUX1
13	JJ271	-7.913776349979382	FKRPMut	FKRP-Mutant	FKRP	CUX1
13	JJ272	2.4489051185174224	FKRPMut	FKRP-Mutant	FKRP	CUX1
13	JJ273	-3.0851739982494513	FKRPMut	FKRP-Mutant	FKRP	CUX1
13	JJ274	12.8743233247669	WT	FKRP-Ctrl	FKRP	CUX1
13	JJ275	59.628555484171635	WT	FKRP-Ctrl	FKRP	CUX1
13	JJ276	-7.933345953924136	WT	FKRP-Ctrl	FKRP	CUX1
13	JJ277	-5.815726130205974	WT	FKRP-Ctrl	FKRP	CUX1
13	JJ306	63.33759706682478	DGdelta/-	ICD-Mutant	ICD	CUX1
13	JJ307	27.419475091145426	DGdelta/-	ICD-Mutant	ICD	CUX1
13	JJ308	-8.706940770685947	DGdelta/-	ICD-Mutant	ICD	CUX1
13	JJ309	-8.610772275289113	DGdelta/-	ICD-Mutant	ICD	CUX1
13	JJ314	24.816313240364252	DGdelta/-	ICD-Mutant	ICD	CUX1
13	JJ315	106.59113994420977	DGdelta/-	ICD-Mutant	ICD	CUX1
13	JJ316	4.999520618016125	DGdelta/-	ICD-Mutant	ICD	CUX1
13	JJ317	14.36879635144779	DGdelta/-	ICD-Mutant	ICD	CUX1
13	JJ322	51.58194774306147	WT	ICD-Ctrl	ICD	CUX1
13	JJ323	26.758858976826293	WT	ICD-Ctrl	ICD	CUX1
13	JJ324	44.91505114480791	WT	ICD-Ctrl	ICD	CUX1
13	JJ325	6.791809107784881	WT	ICD-Ctrl	ICD	CUX1
13	JJ330	30.29161713054187	WT	ICD-Ctrl	ICD	CUX1
13	JJ331	33.53550483611851	WT	ICD-Ctrl	ICD	CUX1
13	JJ332	-24.66673372649571	WT	ICD-Ctrl	ICD	CUX1
13	JJ333	17.393141602092328	WT	ICD-Ctrl	ICD	CUX1
13	JJ346	15.477288225088992	FKRPMut	FKRP-Mutant	FKRP	CUX1
13	JJ347	120.40478377002289	FKRPMut	FKRP-Mutant	FKRP	CUX1
13	JJ348	215.37919218131893	FKRPMut	FKRP-Mutant	FKRP	CUX1
13	JJ349	44.537762920323644	FKRPMut	FKRP-Mutant	FKRP	CUX1
13	JJ350	18.461522132178704	WT	FKRP-Ctrl	FKRP	CUX1
13	JJ351	47.27470039286296	WT	FKRP-Ctrl	FKRP	CUX1
13	JJ352	37.505163277650276	WT	FKRP-Ctrl	FKRP	CUX1
13	JJ353	-2.040250672372167	WT	FKRP-Ctrl	FKRP	CUX1
13	JJ354	321.6539757280243	Emx-Cre+;DGF/-	Emx-DG-cKO	Emx-DG	CUX1
13	JJ355	213.9042433323924	Emx-Cre+;DGF/-	Emx-DG-cKO	Emx-DG	CUX1
13	JJ356	303.2940295744168	Emx-Cre+;DGF/-	Emx-DG-cKO	Emx-DG	CUX1
13	JJ357	124.99908744612007	Emx-Cre+;DGF/-	Emx-DG-cKO	Emx-DG	CUX1
13	JJ362	61.27818248651579	Emx-Cre+;DGF/+	Emx-DG-Ctrl	Emx-DG	CUX1
13	JJ363	-5.299191676002238	Emx-Cre+;DGF/+	Emx-DG-Ctrl	Emx-DG	CUX1
13	JJ364	86.49688094274127	Emx-Cre+;DGF/+	Emx-DG-Ctrl	Emx-DG	CUX1
13	JJ365	-2.6860659443298496	Emx-Cre+;DGF/+	Emx-DG-Ctrl	Emx-DG	CUX1
13	JJ370	275.5966592458903	Emx-Cre+;DGF/-	Emx-DG-cKO	Emx-DG	CUX1
13	JJ371	155.40350698327813	Emx-Cre+;DGF/-	Emx-DG-cKO	Emx-DG	CUX1
13	JJ372	364.30189025611304	Emx-Cre+;DGF/-	Emx-DG-cKO	Emx-DG	CUX1
13	JJ373	280.3649651286822	Emx-Cre+;DGF/-	Emx-DG-cKO	Emx-DG	CUX1
13	JJ378	129.9007860144485	Emx-Cre+;DGF/-	Emx-DG-cKO	Emx-DG	CUX1
13	JJ379	111.67100440458131	Emx-Cre+;DGF/-	Emx-DG-cKO	Emx-DG	CUX1
13	JJ380	286.6150765585273	Emx-Cre+;DGF/-	Emx-DG-cKO	Emx-DG	CUX1
13	JJ381	200.70917951550297	Emx-Cre+;DGF/-	Emx-DG-cKO	Emx-DG	CUX1
13	JJ386	109.0280532375479	Emx-Cre+;DGF/+	Emx-DG-Ctrl	Emx-DG	CUX1
13	JJ387	25.28975340213526	Emx-Cre+;DGF/+	Emx-DG-Ctrl	Emx-DG	CUX1
13	JJ388	55.01744301748695	Emx-Cre+;DGF/+	Emx-DG-Ctrl	Emx-DG	CUX1
13	JJ392	20.948865749966103	Emx-Cre+;DGF/+	Emx-DG-Ctrl	Emx-DG	CUX1
13	JJ393	7.816179399176387	Emx-Cre+;DGF/+	Emx-DG-Ctrl	Emx-DG	CUX1
13	JJ394	10.898751181490601	Emx-Cre+;DGF/+	Emx-DG-Ctrl	Emx-DG	CUX1
13	JJ395	13.518615946523559	Emx-Cre+;DGF/+	Emx-DG-Ctrl	Emx-DG	CUX1
14	JJ001	-2.159985396825391	Emx-Cre+;POMT2F/+	Emx-POMT2-Ctrl	Emx-POMT2	CUX1
14	JJ002	36.78730661604899	Emx-Cre+;POMT2F/+	Emx-POMT2-Ctrl	Emx-POMT2	CUX1
14	JJ003	4.054099324786345	Emx-Cre+;POMT2F/+	Emx-POMT2-Ctrl	Emx-POMT2	CUX1
14	JJ004	20.594102758021165	Emx-Cre+;POMT2F/F	Emx-POMT2-cKO	Emx-POMT2	CUX1
14	JJ005	56.847264521072795	Emx-Cre+;POMT2F/F	Emx-POMT2-cKO	Emx-POMT2	CUX1
14	JJ006	33.320893854511496	Emx-Cre+;POMT2F/F	Emx-POMT2-cKO	Emx-POMT2	CUX1
14	JJ007	25.91499441200695	Emx-Cre+;POMT2F/+	Emx-POMT2-Ctrl	Emx-POMT2	CUX1
14	JJ008	113.00839352612054	Emx-Cre+;POMT2F/F	Emx-POMT2-cKO	Emx-POMT2	CUX1
14	JJ053	45.257420541425176	WT	B4GAT1-Ctrl	B4GAT1	CUX1
14	JJ054	48.01334490375808	WT	B4GAT1-Ctrl	B4GAT1	CUX1
14	JJ055	108.11333521752563	WT	B4GAT1-Ctrl	B4GAT1	CUX1
14	JJ056	61.27083131420428	WT	B4GAT1-Ctrl	B4GAT1	CUX1
14	JJ057	18.96792825959841	B4GAT1M155T/M155T;Thy1	B4GAT1-Mutant	B4GAT1	CUX1
14	JJ058	56.46927009142333	B4GAT1M155T/M155T;Thy1	B4GAT1-Mutant	B4GAT1	CUX1
14	JJ059	57.447227906933676	B4GAT1M155T/M155T;Thy1	B4GAT1-Mutant	B4GAT1	CUX1
14	JJ060	53.3455981263132	B4GAT1M155T/M155T;Thy1	B4GAT1-Mutant	B4GAT1	CUX1
14	JJ069	36.060310298806144	B4GAT1M155T/M155T;Thy1	B4GAT1-Mutant	B4GAT1	CUX1
14	JJ070	90.11840256431306	B4GAT1M155T/M155T;Thy1	B4GAT1-Mutant	B4GAT1	CUX1
14	JJ071	80.69476732636322	B4GAT1M155T/M155T	B4GAT1-Mutant	B4GAT1	CUX1
14	JJ072	77.0245413067596	B4GAT1M155T/M155T	B4GAT1-Mutant	B4GAT1	CUX1
14	JJ073	32.84669898049049	B4GAT1M155T/M155T	B4GAT1-Mutant	B4GAT1	CUX1
14	JJ074	22.352988032967044	B4GAT1M155T/M155T	B4GAT1-Mutant	B4GAT1	CUX1
14	JJ075	67.34540744624935	B4GAT1M155T/M155T;Thy1	B4GAT1-Mutant	B4GAT1	CUX1
14	JJ076	33.63886581274149	B4GAT1M155T/M155T;Thy1	B4GAT1-Mutant	B4GAT1	CUX1
14	JJ086	70.08509822251695	B4GAT1M155T/M155T	B4GAT1-Mutant	B4GAT1	CUX1
14	JJ087	97.94056948824498	B4GAT1M155T/M155T	B4GAT1-Mutant	B4GAT1	CUX1
14	JJ088	18.836814854395584	B4GAT1M155T/M155T	B4GAT1-Mutant	B4GAT1	CUX1
14	JJ089	33.84525812353669	B4GAT1M155T/M155T	B4GAT1-Mutant	B4GAT1	CUX1
14	JJ090	72.60330565432098	B4GAT1M155T/M155T;Thy1	B4GAT1-Mutant	B4GAT1	CUX1
14	JJ091	22.787209965519043	B4GAT1M155T/M155T;Thy1	B4GAT1-Mutant	B4GAT1	CUX1
14	JJ092	37.173669616659446	B4GAT1M155T/M155T;Thy1	B4GAT1-Mutant	B4GAT1	CUX1
14	JJ093	-22.907281155303014	B4GAT1M155T/M155T;Thy1	B4GAT1-Mutant	B4GAT1	CUX1
14	JJ106	63.735161826923104	WT	B4GAT1-Ctrl	B4GAT1	CUX1
14	JJ107	90.58317654090968	WT	B4GAT1-Ctrl	B4GAT1	CUX1
14	JJ108	-4.742414916279699	WT	B4GAT1-Ctrl	B4GAT1	CUX1
14	JJ109	55.33560496655514	WT	B4GAT1-Ctrl	B4GAT1	CUX1
14	JJ114	47.57276556919502	WT	B4GAT1-Ctrl	B4GAT1	CUX1
14	JJ115	181.29184275244097	WT	B4GAT1-Ctrl	B4GAT1	CUX1
14	JJ116	96.20603579806489	WT	B4GAT1-Ctrl	B4GAT1	CUX1
14	JJ117	37.03569021733548	WT	B4GAT1-Ctrl	B4GAT1	CUX1
14	JJ118	21.89490175208823	Emx-Cre+;DGF/-	Emx-DG-cKO	Emx-DG	CUX1
14	JJ119	113.7554634540946	Emx-Cre+;DGF/-	Emx-DG-cKO	Emx-DG	CUX1
14	JJ120	57.24657740247299	Emx-Cre+;DGF/-	Emx-DG-cKO	Emx-DG	CUX1
14	JJ121	44.38461413438839	Emx-Cre+;DGF/-	Emx-DG-cKO	Emx-DG	CUX1
14	JJ126	170.98496134856632	Emx-Cre+;DGF/-	Emx-DG-cKO	Emx-DG	CUX1
14	JJ127	179.24208115433274	Emx-Cre+;DGF/-	Emx-DG-cKO	Emx-DG	CUX1
14	JJ128	170.00929340318507	Emx-Cre+;DGF/-	Emx-DG-cKO	Emx-DG	CUX1
14	JJ129	49.788987570261554	Emx-Cre+;DGF/-	Emx-DG-cKO	Emx-DG	CUX1
14	JJ138	-2.7343985064037306	Emx-Cre+;DGF/+	Emx-DG-Ctrl	Emx-DG	CUX1
14	JJ139	14.161329997721566	Emx-Cre+;DGF/+	Emx-DG-Ctrl	Emx-DG	CUX1
14	JJ140	-9.764996786951846	Emx-Cre+;DGF/+	Emx-DG-Ctrl	Emx-DG	CUX1
14	JJ141	1.4512337585467776	Emx-Cre+;DGF/+	Emx-DG-Ctrl	Emx-DG	CUX1
14	JJ158	24.304719860061045	Emx-Cre+;POMT2F/F	Emx-POMT2-cKO	Emx-POMT2	CUX1
14	JJ159	115.43795880191493	Emx-Cre+;POMT2F/F	Emx-POMT2-cKO	Emx-POMT2	CUX1
14	JJ160	73.55870439806972	Emx-Cre+;POMT2F/F	Emx-POMT2-cKO	Emx-POMT2	CUX1
14	JJ161	186.69623602485103	Emx-Cre+;POMT2F/F	Emx-POMT2-cKO	Emx-POMT2	CUX1
14	JJ162	69.82080594593641	Emx-Cre+;POMT2F/+	Emx-POMT2-Ctrl	Emx-POMT2	CUX1
14	JJ163	23.947137445396532	Emx-Cre+;POMT2F/+	Emx-POMT2-Ctrl	Emx-POMT2	CUX1
14	JJ164	18.131579197874185	Emx-Cre+;POMT2F/+	Emx-POMT2-Ctrl	Emx-POMT2	CUX1
14	JJ165	14.24544497461907	Emx-Cre+;POMT2F/+	Emx-POMT2-Ctrl	Emx-POMT2	CUX1
14	JJ190	158.00886975152295	Emx-Cre+;POMT2F/F	Emx-POMT2-cKO	Emx-POMT2	CUX1
14	JJ191	224.7313076774805	Emx-Cre+;POMT2F/F	Emx-POMT2-cKO	Emx-POMT2	CUX1
14	JJ192	227.4511056181728	Emx-Cre+;POMT2F/F	Emx-POMT2-cKO	Emx-POMT2	CUX1
14	JJ193	-11.713379250138965	Emx-Cre+;POMT2F/F	Emx-POMT2-cKO	Emx-POMT2	CUX1
14	JJ198	3.0915237751125724	Emx-Cre+;POMT2F/+	Emx-POMT2-Ctrl	Emx-POMT2	CUX1
14	JJ199	36.61215844343002	Emx-Cre+;POMT2F/+	Emx-POMT2-Ctrl	Emx-POMT2	CUX1
14	JJ200	5.7680593884880595	Emx-Cre+;POMT2F/+	Emx-POMT2-Ctrl	Emx-POMT2	CUX1
14	JJ201	13.497158281240806	Emx-Cre+;POMT2F/+	Emx-POMT2-Ctrl	Emx-POMT2	CUX1
14	JJ206	17.80545894504049	Emx-Cre+;POMT2F/+	Emx-POMT2-Ctrl	Emx-POMT2	CUX1
14	JJ207	29.02557576926093	Emx-Cre+;POMT2F/+	Emx-POMT2-Ctrl	Emx-POMT2	CUX1
14	JJ208	23.68554965413991	Emx-Cre+;POMT2F/+	Emx-POMT2-Ctrl	Emx-POMT2	CUX1
14	JJ209	42.84929165830071	Emx-Cre+;POMT2F/+	Emx-POMT2-Ctrl	Emx-POMT2	CUX1
14	JJ226	0.9258578001177966	WT	ICD-Ctrl	ICD	CUX1
14	JJ227	47.89912816757203	DGdelta/-	ICD-Mutant	ICD	CUX1
14	JJ228	7.435320225851835	DGdelta/-	ICD-Mutant	ICD	CUX1
14	JJ229	40.970478365993664	DGdelta/-	ICD-Mutant	ICD	CUX1
14	JJ230	21.06537711035465	DGdelta/-	ICD-Mutant	ICD	CUX1
14	JJ235	19.782948822331264	WT	ICD-Ctrl	ICD	CUX1
14	JJ236	25.54470627966589	WT	ICD-Ctrl	ICD	CUX1
14	JJ237	25.293543537628732	WT	ICD-Ctrl	ICD	CUX1
14	JJ258	28.078688810524326	FKRPMut	FKRP-Mutant	FKRP	CUX1
14	JJ259	12.015514026352244	FKRPMut	FKRP-Mutant	FKRP	CUX1
14	JJ260	48.096822706119156	FKRPMut	FKRP-Mutant	FKRP	CUX1
14	JJ261	50.57157369437126	FKRPMut	FKRP-Mutant	FKRP	CUX1
14	JJ262	17.200026177047544	WT	FKRP-Ctrl	FKRP	CUX1
14	JJ263	83.8316276418186	WT	FKRP-Ctrl	FKRP	CUX1
14	JJ264	92.71409840996974	WT	FKRP-Ctrl	FKRP	CUX1
14	JJ265	34.62114100607479	WT	FKRP-Ctrl	FKRP	CUX1
[truncated: 12,701 more rows]
