# Supplementary material for: Inhibitory CCK+ basket synapse defects in mouse models of dystroglycanopathy
Source: eLife. 2024 Jan 5;12:RP87965. doi: 10.7554/eLife.87965 (PMC10942650; doi:10.7554/eLife.87965)
Supplement: Figure 2—source data 2. [file elife-87965-fig2-data2.csv]

percent	Image	Intensity	Genotype	Condition	Experiment	Marker
1	JJ009	-28.989338856770434	Emx-Cre+;POMT2F/+	Emx-POMT2-Ctrl	Emx-POMT2	TBR1
1	JJ010	-62.57636107834731	Emx-Cre+;POMT2F/+	Emx-POMT2-Ctrl	Emx-POMT2	TBR1
1	JJ011	-118.75090558983227	Emx-Cre+;POMT2F/+	Emx-POMT2-Ctrl	Emx-POMT2	TBR1
1	JJ012	-84.18523188496557	Emx-Cre+;POMT2F/F	Emx-POMT2-cKO	Emx-POMT2	TBR1
1	JJ013	-23.611877240010955	Emx-Cre+;POMT2F/F	Emx-POMT2-cKO	Emx-POMT2	TBR1
1	JJ014	-59.950784989148815	Emx-Cre+;POMT2F/F	Emx-POMT2-cKO	Emx-POMT2	TBR1
1	JJ015	-170.6072197008547	Emx-Cre+;POMT2F/+	Emx-POMT2-Ctrl	Emx-POMT2	TBR1
1	JJ016	-121.34045777777779	Emx-Cre+;POMT2F/F	Emx-POMT2-cKO	Emx-POMT2	TBR1
1	JJ041	-106.33680664102563	Emx-Cre+;POMT2F/F	Emx-POMT2-cKO	Emx-POMT2	TBR1
1	JJ042	-4.915756184782613	Emx-Cre+;POMT2F/F	Emx-POMT2-cKO	Emx-POMT2	TBR1
1	JJ043	-52.162687782701596	Emx-Cre+;POMT2F/F	Emx-POMT2-cKO	Emx-POMT2	TBR1
1	JJ044	-51.40818591517179	Emx-Cre+;POMT2F/F	Emx-POMT2-cKO	Emx-POMT2	TBR1
1	JJ045	-132.27836529324622	Emx-Cre+;POMT2F/+	Emx-POMT2-Ctrl	Emx-POMT2	TBR1
1	JJ046	-84.0714809536671	Emx-Cre+;POMT2F/+	Emx-POMT2-Ctrl	Emx-POMT2	TBR1
1	JJ047	-30.523371525876012	Emx-Cre+;POMT2F/+	Emx-POMT2-Ctrl	Emx-POMT2	TBR1
1	JJ048	-127.80209816293369	Emx-Cre+;POMT2F/+	Emx-POMT2-Ctrl	Emx-POMT2	TBR1
1	JJ049	-77.9296861935053	Emx-Cre+;POMT2F/+	Emx-POMT2-Ctrl	Emx-POMT2	TBR1
1	JJ050	-64.65355407502375	Emx-Cre+;POMT2F/+	Emx-POMT2-Ctrl	Emx-POMT2	TBR1
1	JJ051	-70.7025581908832	Emx-Cre+;POMT2F/+	Emx-POMT2-Ctrl	Emx-POMT2	TBR1
1	JJ052	-89.22006027878938	Emx-Cre+;POMT2F/+	Emx-POMT2-Ctrl	Emx-POMT2	TBR1
1	JJ061	11.864583827404479	WT	B4GAT1-Ctrl	B4GAT1	TBR1
1	JJ062	-34.52169989833114	WT	B4GAT1-Ctrl	B4GAT1	TBR1
1	JJ063	-14.794891670385804	WT	B4GAT1-Ctrl	B4GAT1	TBR1
1	JJ064	-20.209631974026298	WT	B4GAT1-Ctrl	B4GAT1	TBR1
1	JJ065	-1.9494952298850592	B4GAT1M155T/M155T;Thy1	B4GAT1-Mutant	B4GAT1	TBR1
1	JJ066	6.258068552306436	B4GAT1M155T/M155T;Thy1	B4GAT1-Mutant	B4GAT1	TBR1
1	JJ067	-11.107288497354489	B4GAT1M155T/M155T;Thy1	B4GAT1-Mutant	B4GAT1	TBR1
1	JJ068	-20.049741269096575	B4GAT1M155T/M155T;Thy1	B4GAT1-Mutant	B4GAT1	TBR1
1	JJ078	8.837686776334758	B4GAT1M155T/M155T	B4GAT1-Mutant	B4GAT1	TBR1
1	JJ079	-86.92797139337527	B4GAT1M155T/M155T	B4GAT1-Mutant	B4GAT1	TBR1
1	JJ080	-1.0084587540670593	B4GAT1M155T/M155T	B4GAT1-Mutant	B4GAT1	TBR1
1	JJ081	-6.478194700904861	B4GAT1M155T/M155T	B4GAT1-Mutant	B4GAT1	TBR1
1	JJ082	27.20982044593444	B4GAT1M155T/M155T;Thy1	B4GAT1-Mutant	B4GAT1	TBR1
1	JJ083	17.81794934668248	B4GAT1M155T/M155T;Thy1	B4GAT1-Mutant	B4GAT1	TBR1
1	JJ084	93.38035402536231	B4GAT1M155T/M155T;Thy1	B4GAT1-Mutant	B4GAT1	TBR1
1	JJ085	18.375318453219602	B4GAT1M155T/M155T;Thy1	B4GAT1-Mutant	B4GAT1	TBR1
1	JJ094	-72.7983322569551	B4GAT1M155T/M155T	B4GAT1-Mutant	B4GAT1	TBR1
1	JJ095	-50.24815270322794	B4GAT1M155T/M155T	B4GAT1-Mutant	B4GAT1	TBR1
1	JJ096	-81.62775164558629	B4GAT1M155T/M155T	B4GAT1-Mutant	B4GAT1	TBR1
1	JJ097	-0.944604247078748	B4GAT1M155T/M155T	B4GAT1-Mutant	B4GAT1	TBR1
1	JJ098	71.83850330981183	B4GAT1M155T/M155T;Thy1	B4GAT1-Mutant	B4GAT1	TBR1
1	JJ099	-64.1940338312245	B4GAT1M155T/M155T;Thy1	B4GAT1-Mutant	B4GAT1	TBR1
1	JJ100	-50.09959337121211	B4GAT1M155T/M155T;Thy1	B4GAT1-Mutant	B4GAT1	TBR1
1	JJ101	44.812595469819165	B4GAT1M155T/M155T;Thy1	B4GAT1-Mutant	B4GAT1	TBR1
1	JJ102	-42.488061130496966	WT	B4GAT1-Ctrl	B4GAT1	TBR1
1	JJ103	-37.19772355526087	WT	B4GAT1-Ctrl	B4GAT1	TBR1
1	JJ104	92.56850679934878	WT	B4GAT1-Ctrl	B4GAT1	TBR1
1	JJ105	106.24081851505018	WT	B4GAT1-Ctrl	B4GAT1	TBR1
1	JJ110	52.72150613484579	WT	B4GAT1-Ctrl	B4GAT1	TBR1
1	JJ111	69.68238440992434	WT	B4GAT1-Ctrl	B4GAT1	TBR1
1	JJ112	18.048196964221386	WT	B4GAT1-Ctrl	B4GAT1	TBR1
1	JJ113	131.34175715916714	WT	B4GAT1-Ctrl	B4GAT1	TBR1
1	JJ122	16.291374502023093	Emx-Cre+;DGF/-	Emx-DG-cKO	Emx-DG	TBR1
1	JJ123	35.917987796400816	Emx-Cre+;DGF/-	Emx-DG-cKO	Emx-DG	TBR1
1	JJ124	48.83655451608553	Emx-Cre+;DGF/-	Emx-DG-cKO	Emx-DG	TBR1
1	JJ125	-33.97753503701288	Emx-Cre+;DGF/-	Emx-DG-cKO	Emx-DG	TBR1
1	JJ142	65.42768654866033	Emx-Cre+;DGF/+	Emx-DG-Ctrl	Emx-DG	TBR1
1	JJ143	130.5722813357072	Emx-Cre+;DGF/+	Emx-DG-Ctrl	Emx-DG	TBR1
1	JJ144	180.91042003572946	Emx-Cre+;DGF/+	Emx-DG-Ctrl	Emx-DG	TBR1
1	JJ145	13.601031054292926	Emx-Cre+;DGF/+	Emx-DG-Ctrl	Emx-DG	TBR1
1	JJ150	-28.002598937321903	Emx-Cre+;DGF/-	Emx-DG-cKO	Emx-DG	TBR1
1	JJ151	12.646199980299684	Emx-Cre+;DGF/-	Emx-DG-cKO	Emx-DG	TBR1
1	JJ152	19.783137849477725	Emx-Cre+;DGF/-	Emx-DG-cKO	Emx-DG	TBR1
1	JJ153	-0.8604990076164919	Emx-Cre+;DGF/-	Emx-DG-cKO	Emx-DG	TBR1
1	JJ166	4.229162334229367	Emx-Cre+;POMT2F/F	Emx-POMT2-cKO	Emx-POMT2	TBR1
1	JJ167	-65.21603949318853	Emx-Cre+;POMT2F/F	Emx-POMT2-cKO	Emx-POMT2	TBR1
1	JJ168	-34.30137211655415	Emx-Cre+;POMT2F/F	Emx-POMT2-cKO	Emx-POMT2	TBR1
1	JJ169	2.7211397424257293	Emx-Cre+;POMT2F/F	Emx-POMT2-cKO	Emx-POMT2	TBR1
1	JJ170	-226.2694042847193	Emx-Cre+;POMT2F/+	Emx-POMT2-Ctrl	Emx-POMT2	TBR1
1	JJ171	-133.32956941370037	Emx-Cre+;POMT2F/+	Emx-POMT2-Ctrl	Emx-POMT2	TBR1
1	JJ172	-130.42521503521957	Emx-Cre+;POMT2F/+	Emx-POMT2-Ctrl	Emx-POMT2	TBR1
1	JJ173	-90.632819963545	Emx-Cre+;POMT2F/+	Emx-POMT2-Ctrl	Emx-POMT2	TBR1
1	JJ194	-234.81944299905612	Emx-Cre+;POMT2F/F	Emx-POMT2-cKO	Emx-POMT2	TBR1
1	JJ195	-240.7606622284019	Emx-Cre+;POMT2F/F	Emx-POMT2-cKO	Emx-POMT2	TBR1
1	JJ196	-85.62132724321316	Emx-Cre+;POMT2F/F	Emx-POMT2-cKO	Emx-POMT2	TBR1
1	JJ197	18.23737717803033	Emx-Cre+;POMT2F/F	Emx-POMT2-cKO	Emx-POMT2	TBR1
1	JJ202	-135.21278366962517	Emx-Cre+;POMT2F/+	Emx-POMT2-Ctrl	Emx-POMT2	TBR1
1	JJ203	-141.750146818555	Emx-Cre+;POMT2F/+	Emx-POMT2-Ctrl	Emx-POMT2	TBR1
1	JJ204	-128.1227688784461	Emx-Cre+;POMT2F/+	Emx-POMT2-Ctrl	Emx-POMT2	TBR1
1	JJ205	-179.051031754386	Emx-Cre+;POMT2F/+	Emx-POMT2-Ctrl	Emx-POMT2	TBR1
1	JJ210	-84.42269213182192	Emx-Cre+;POMT2F/+	Emx-POMT2-Ctrl	Emx-POMT2	TBR1
1	JJ211	-170.4951389993912	Emx-Cre+;POMT2F/+	Emx-POMT2-Ctrl	Emx-POMT2	TBR1
1	JJ212	-118.68828022299381	Emx-Cre+;POMT2F/+	Emx-POMT2-Ctrl	Emx-POMT2	TBR1
1	JJ213	-34.71763056003257	Emx-Cre+;POMT2F/+	Emx-POMT2-Ctrl	Emx-POMT2	TBR1
1	JJ214	-280.79550466374275	DGdelta/-	ICD-Mutant	ICD	TBR1
1	JJ215	-190.66990767907907	DGdelta/-	ICD-Mutant	ICD	TBR1
1	JJ216	-269.7393749674072	DGdelta/-	ICD-Mutant	ICD	TBR1
1	JJ217	1.878424517694005	DGdelta/-	ICD-Mutant	ICD	TBR1
1	JJ222	-135.84654112465788	WT	ICD-Ctrl	ICD	TBR1
1	JJ223	-213.26067688459366	WT	ICD-Ctrl	ICD	TBR1
1	JJ224	-124.41291017411663	WT	ICD-Ctrl	ICD	TBR1
1	JJ225	-80.35474995577768	WT	ICD-Ctrl	ICD	TBR1
1	JJ238	-206.61154626619933	FKRPMut	FKRP-Mutant	FKRP	TBR1
1	JJ239	-112.83340106149917	FKRPMut	FKRP-Mutant	FKRP	TBR1
1	JJ240	-275.93181815434673	FKRPMut	FKRP-Mutant	FKRP	TBR1
1	JJ241	-189.52454232277486	FKRPMut	FKRP-Mutant	FKRP	TBR1
1	JJ242	-116.73819076897337	WT	FKRP-Ctrl	FKRP	TBR1
1	JJ243	-255.69964041826654	WT	FKRP-Ctrl	FKRP	TBR1
1	JJ244	-81.05410353484797	WT	FKRP-Ctrl	FKRP	TBR1
1	JJ245	-185.1511881436867	WT	FKRP-Ctrl	FKRP	TBR1
1	JJ246	-352.35711550308645	WT	FKRP-Ctrl	FKRP	TBR1
1	JJ247	-376.0947039058566	WT	FKRP-Ctrl	FKRP	TBR1
1	JJ248	-232.97792722801384	WT	FKRP-Ctrl	FKRP	TBR1
1	JJ249	-200.44662262180339	WT	FKRP-Ctrl	FKRP	TBR1
1	JJ250	80.01940392348153	FKRPMut	FKRP-Mutant	FKRP	TBR1
1	JJ251	205.28064467360323	FKRPMut	FKRP-Mutant	FKRP	TBR1
1	JJ252	-79.33822381715466	FKRPMut	FKRP-Mutant	FKRP	TBR1
1	JJ253	-39.09544561468753	FKRPMut	FKRP-Mutant	FKRP	TBR1
1	JJ254	-200.06738049786324	WT	FKRP-Ctrl	FKRP	TBR1
1	JJ255	-306.99167395743154	WT	FKRP-Ctrl	FKRP	TBR1
1	JJ256	-301.25682314327486	WT	FKRP-Ctrl	FKRP	TBR1
1	JJ257	-79.4998983928571	WT	FKRP-Ctrl	FKRP	TBR1
1	JJ310	-118.18161174894715	DGdelta/-	ICD-Mutant	ICD	TBR1
1	JJ311	-181.49955634965252	DGdelta/-	ICD-Mutant	ICD	TBR1
1	JJ312	-92.39048643274857	DGdelta/-	ICD-Mutant	ICD	TBR1
1	JJ313	-161.2597155377824	DGdelta/-	ICD-Mutant	ICD	TBR1
1	JJ318	-17.66197811023282	DGdelta/-	ICD-Mutant	ICD	TBR1
1	JJ319	9.160753175375058	DGdelta/-	ICD-Mutant	ICD	TBR1
1	JJ320	60.82919496077924	DGdelta/-	ICD-Mutant	ICD	TBR1
1	JJ321	81.45274078156244	DGdelta/-	ICD-Mutant	ICD	TBR1
1	JJ326	-125.2496137981769	WT	ICD-Ctrl	ICD	TBR1
1	JJ327	-163.91675574394893	WT	ICD-Ctrl	ICD	TBR1
1	JJ328	18.22579498457742	WT	ICD-Ctrl	ICD	TBR1
1	JJ329	-42.32083325926627	WT	ICD-Ctrl	ICD	TBR1
1	JJ334	120.0741459926016	WT	ICD-Ctrl	ICD	TBR1
1	JJ335	8.060415189255195	WT	ICD-Ctrl	ICD	TBR1
1	JJ336	99.6294121662246	WT	ICD-Ctrl	ICD	TBR1
1	JJ337	-95.54814424162264	WT	ICD-Ctrl	ICD	TBR1
1	JJ338	-37.36844894580819	FKRPMut	FKRP-Mutant	FKRP	TBR1
1	JJ339	-2.7550896021303592	FKRPMut	FKRP-Mutant	FKRP	TBR1
1	JJ340	-33.6829653288338	FKRPMut	FKRP-Mutant	FKRP	TBR1
1	JJ341	-15.133357587967907	FKRPMut	FKRP-Mutant	FKRP	TBR1
1	JJ342	95.82006866337663	WT	FKRP-Ctrl	FKRP	TBR1
1	JJ343	-42.72204312652925	WT	FKRP-Ctrl	FKRP	TBR1
1	JJ344	24.23679814264661	WT	FKRP-Ctrl	FKRP	TBR1
1	JJ345	175.93202477632335	WT	FKRP-Ctrl	FKRP	TBR1
1	JJ358	6.874388227513198	Emx-Cre+;DGF/-	Emx-DG-cKO	Emx-DG	TBR1
1	JJ359	-131.11071666157912	Emx-Cre+;DGF/-	Emx-DG-cKO	Emx-DG	TBR1
1	JJ360	56.675187966558724	Emx-Cre+;DGF/-	Emx-DG-cKO	Emx-DG	TBR1
1	JJ361	1.4512212631386394	Emx-Cre+;DGF/-	Emx-DG-cKO	Emx-DG	TBR1
1	JJ366	-90.45563562083048	Emx-Cre+;DGF/+	Emx-DG-Ctrl	Emx-DG	TBR1
1	JJ367	-14.03029785436513	Emx-Cre+;DGF/+	Emx-DG-Ctrl	Emx-DG	TBR1
1	JJ368	117.19020096037302	Emx-Cre+;DGF/+	Emx-DG-Ctrl	Emx-DG	TBR1
1	JJ369	-29.17595247310055	Emx-Cre+;DGF/+	Emx-DG-Ctrl	Emx-DG	TBR1
1	JJ374	-148.04706101594084	Emx-Cre+;DGF/-	Emx-DG-cKO	Emx-DG	TBR1
1	JJ375	136.5009537256817	Emx-Cre+;DGF/-	Emx-DG-cKO	Emx-DG	TBR1
1	JJ376	226.163234429742	Emx-Cre+;DGF/-	Emx-DG-cKO	Emx-DG	TBR1
1	JJ377	-7.434415034280694	Emx-Cre+;DGF/-	Emx-DG-cKO	Emx-DG	TBR1
1	JJ382	-14.404222346390194	Emx-Cre+;DGF/-	Emx-DG-cKO	Emx-DG	TBR1
1	JJ383	167.23261566307613	Emx-Cre+;DGF/-	Emx-DG-cKO	Emx-DG	TBR1
1	JJ384	34.83248044586575	Emx-Cre+;DGF/-	Emx-DG-cKO	Emx-DG	TBR1
1	JJ385	76.07878329366895	Emx-Cre+;DGF/-	Emx-DG-cKO	Emx-DG	TBR1
1	JJ389	-0.31300262833470543	Emx-Cre+;DGF/+	Emx-DG-Ctrl	Emx-DG	TBR1
1	JJ390	118.1982141454392	Emx-Cre+;DGF/+	Emx-DG-Ctrl	Emx-DG	TBR1
1	JJ391	133.5476543930591	Emx-Cre+;DGF/+	Emx-DG-Ctrl	Emx-DG	TBR1
1	JJ396	-102.13727982472437	Emx-Cre+;DGF/+	Emx-DG-Ctrl	Emx-DG	TBR1
1	JJ397	-59.31688363536151	Emx-Cre+;DGF/+	Emx-DG-Ctrl	Emx-DG	TBR1
1	JJ398	107.40539859920636	Emx-Cre+;DGF/+	Emx-DG-Ctrl	Emx-DG	TBR1
1	JJ399	-19.181063975327827	Emx-Cre+;DGF/+	Emx-DG-Ctrl	Emx-DG	TBR1
2	JJ009	11.14799509100222	Emx-Cre+;POMT2F/+	Emx-POMT2-Ctrl	Emx-POMT2	TBR1
2	JJ010	1.4961056457498596	Emx-Cre+;POMT2F/+	Emx-POMT2-Ctrl	Emx-POMT2	TBR1
2	JJ011	-56.661472424060854	Emx-Cre+;POMT2F/+	Emx-POMT2-Ctrl	Emx-POMT2	TBR1
2	JJ012	-47.487381635097655	Emx-Cre+;POMT2F/F	Emx-POMT2-cKO	Emx-POMT2	TBR1
2	JJ013	22.44560844994831	Emx-Cre+;POMT2F/F	Emx-POMT2-cKO	Emx-POMT2	TBR1
2	JJ014	-50.3782545801684	Emx-Cre+;POMT2F/F	Emx-POMT2-cKO	Emx-POMT2	TBR1
2	JJ015	-109.61371273504272	Emx-Cre+;POMT2F/+	Emx-POMT2-Ctrl	Emx-POMT2	TBR1
2	JJ016	-5.414039003831438	Emx-Cre+;POMT2F/F	Emx-POMT2-cKO	Emx-POMT2	TBR1
2	JJ041	11.938578487179504	Emx-Cre+;POMT2F/F	Emx-POMT2-cKO	Emx-POMT2	TBR1
2	JJ042	59.50843110990337	Emx-Cre+;POMT2F/F	Emx-POMT2-cKO	Emx-POMT2	TBR1
2	JJ043	61.07604372974729	Emx-Cre+;POMT2F/F	Emx-POMT2-cKO	Emx-POMT2	TBR1
2	JJ044	44.12522099675689	Emx-Cre+;POMT2F/F	Emx-POMT2-cKO	Emx-POMT2	TBR1
2	JJ045	-53.58456431575877	Emx-Cre+;POMT2F/+	Emx-POMT2-Ctrl	Emx-POMT2	TBR1
2	JJ046	-56.520036315985955	Emx-Cre+;POMT2F/+	Emx-POMT2-Ctrl	Emx-POMT2	TBR1
2	JJ047	30.477430198564434	Emx-Cre+;POMT2F/+	Emx-POMT2-Ctrl	Emx-POMT2	TBR1
2	JJ048	-86.7692601919192	Emx-Cre+;POMT2F/+	Emx-POMT2-Ctrl	Emx-POMT2	TBR1
2	JJ049	-37.46042872481394	Emx-Cre+;POMT2F/+	Emx-POMT2-Ctrl	Emx-POMT2	TBR1
2	JJ050	-37.65632473029441	Emx-Cre+;POMT2F/+	Emx-POMT2-Ctrl	Emx-POMT2	TBR1
2	JJ051	-33.56314081196583	Emx-Cre+;POMT2F/+	Emx-POMT2-Ctrl	Emx-POMT2	TBR1
2	JJ052	-39.595950886576645	Emx-Cre+;POMT2F/+	Emx-POMT2-Ctrl	Emx-POMT2	TBR1
2	JJ061	42.42975459766749	WT	B4GAT1-Ctrl	B4GAT1	TBR1
2	JJ062	24.526152855292064	WT	B4GAT1-Ctrl	B4GAT1	TBR1
2	JJ063	38.13672485640371	WT	B4GAT1-Ctrl	B4GAT1	TBR1
2	JJ064	33.674954232870256	WT	B4GAT1-Ctrl	B4GAT1	TBR1
2	JJ065	25.499754961685824	B4GAT1M155T/M155T;Thy1	B4GAT1-Mutant	B4GAT1	TBR1
2	JJ066	24.90711063898466	B4GAT1M155T/M155T;Thy1	B4GAT1-Mutant	B4GAT1	TBR1
2	JJ067	1.7178983158323244	B4GAT1M155T/M155T;Thy1	B4GAT1-Mutant	B4GAT1	TBR1
2	JJ068	0.9228113234960157	B4GAT1M155T/M155T;Thy1	B4GAT1-Mutant	B4GAT1	TBR1
2	JJ078	71.18267395526694	B4GAT1M155T/M155T	B4GAT1-Mutant	B4GAT1	TBR1
2	JJ079	-41.90589481938565	B4GAT1M155T/M155T	B4GAT1-Mutant	B4GAT1	TBR1
2	JJ080	30.491030395980413	B4GAT1M155T/M155T	B4GAT1-Mutant	B4GAT1	TBR1
2	JJ081	68.12279241243	B4GAT1M155T/M155T	B4GAT1-Mutant	B4GAT1	TBR1
2	JJ082	23.564652985616988	B4GAT1M155T/M155T;Thy1	B4GAT1-Mutant	B4GAT1	TBR1
2	JJ083	116.32385230234748	B4GAT1M155T/M155T;Thy1	B4GAT1-Mutant	B4GAT1	TBR1
2	JJ084	137.35927013647344	B4GAT1M155T/M155T;Thy1	B4GAT1-Mutant	B4GAT1	TBR1
2	JJ085	77.52759092880977	B4GAT1M155T/M155T;Thy1	B4GAT1-Mutant	B4GAT1	TBR1
2	JJ094	34.01522060018772	B4GAT1M155T/M155T	B4GAT1-Mutant	B4GAT1	TBR1
2	JJ095	-6.636074780522638	B4GAT1M155T/M155T	B4GAT1-Mutant	B4GAT1	TBR1
2	JJ096	-24.678569748353084	B4GAT1M155T/M155T	B4GAT1-Mutant	B4GAT1	TBR1
2	JJ097	0.06452388765018213	B4GAT1M155T/M155T	B4GAT1-Mutant	B4GAT1	TBR1
2	JJ098	53.39111587701613	B4GAT1M155T/M155T;Thy1	B4GAT1-Mutant	B4GAT1	TBR1
2	JJ099	27.823487392202765	B4GAT1M155T/M155T;Thy1	B4GAT1-Mutant	B4GAT1	TBR1
2	JJ100	13.747755113636364	B4GAT1M155T/M155T;Thy1	B4GAT1-Mutant	B4GAT1	TBR1
2	JJ101	56.63364408093029	B4GAT1M155T/M155T;Thy1	B4GAT1-Mutant	B4GAT1	TBR1
2	JJ102	70.83875988613757	WT	B4GAT1-Ctrl	B4GAT1	TBR1
2	JJ103	10.601560906867045	WT	B4GAT1-Ctrl	B4GAT1	TBR1
2	JJ104	117.98092004721205	WT	B4GAT1-Ctrl	B4GAT1	TBR1
2	JJ105	70.3092857670011	WT	B4GAT1-Ctrl	B4GAT1	TBR1
2	JJ110	153.0533410528142	WT	B4GAT1-Ctrl	B4GAT1	TBR1
2	JJ111	79.86366974604415	WT	B4GAT1-Ctrl	B4GAT1	TBR1
2	JJ112	59.93497417640892	WT	B4GAT1-Ctrl	B4GAT1	TBR1
2	JJ113	136.1090728162244	WT	B4GAT1-Ctrl	B4GAT1	TBR1
2	JJ122	60.64739485683166	Emx-Cre+;DGF/-	Emx-DG-cKO	Emx-DG	TBR1
2	JJ123	167.42505705903395	Emx-Cre+;DGF/-	Emx-DG-cKO	Emx-DG	TBR1
2	JJ124	79.08366334310301	Emx-Cre+;DGF/-	Emx-DG-cKO	Emx-DG	TBR1
2	JJ125	93.58990899517721	Emx-Cre+;DGF/-	Emx-DG-cKO	Emx-DG	TBR1
2	JJ142	12.884359159436675	Emx-Cre+;DGF/+	Emx-DG-Ctrl	Emx-DG	TBR1
2	JJ143	128.2212341451358	Emx-Cre+;DGF/+	Emx-DG-Ctrl	Emx-DG	TBR1
2	JJ144	132.4836375082102	Emx-Cre+;DGF/+	Emx-DG-Ctrl	Emx-DG	TBR1
2	JJ145	85.01047174693365	Emx-Cre+;DGF/+	Emx-DG-Ctrl	Emx-DG	TBR1
2	JJ150	7.754232116809173	Emx-Cre+;DGF/-	Emx-DG-cKO	Emx-DG	TBR1
2	JJ151	26.31843989017428	Emx-Cre+;DGF/-	Emx-DG-cKO	Emx-DG	TBR1
2	JJ152	106.25580926719579	Emx-Cre+;DGF/-	Emx-DG-cKO	Emx-DG	TBR1
2	JJ153	34.305776440412195	Emx-Cre+;DGF/-	Emx-DG-cKO	Emx-DG	TBR1
2	JJ166	7.260047866976208	Emx-Cre+;POMT2F/F	Emx-POMT2-cKO	Emx-POMT2	TBR1
2	JJ167	-26.613493408527898	Emx-Cre+;POMT2F/F	Emx-POMT2-cKO	Emx-POMT2	TBR1
2	JJ168	-7.0724338692756605	Emx-Cre+;POMT2F/F	Emx-POMT2-cKO	Emx-POMT2	TBR1
2	JJ169	54.82865079236291	Emx-Cre+;POMT2F/F	Emx-POMT2-cKO	Emx-POMT2	TBR1
2	JJ170	-143.34352237106302	Emx-Cre+;POMT2F/+	Emx-POMT2-Ctrl	Emx-POMT2	TBR1
2	JJ171	-111.46472132631932	Emx-Cre+;POMT2F/+	Emx-POMT2-Ctrl	Emx-POMT2	TBR1
2	JJ172	-57.73829432198645	Emx-Cre+;POMT2F/+	Emx-POMT2-Ctrl	Emx-POMT2	TBR1
2	JJ173	8.95512080476673	Emx-Cre+;POMT2F/+	Emx-POMT2-Ctrl	Emx-POMT2	TBR1
2	JJ194	10.74836231384696	Emx-Cre+;POMT2F/F	Emx-POMT2-cKO	Emx-POMT2	TBR1
2	JJ195	58.510344223210986	Emx-Cre+;POMT2F/F	Emx-POMT2-cKO	Emx-POMT2	TBR1
2	JJ196	-28.348897231870637	Emx-Cre+;POMT2F/F	Emx-POMT2-cKO	Emx-POMT2	TBR1
2	JJ197	51.80070159870775	Emx-Cre+;POMT2F/F	Emx-POMT2-cKO	Emx-POMT2	TBR1
2	JJ202	-74.33971869851528	Emx-Cre+;POMT2F/+	Emx-POMT2-Ctrl	Emx-POMT2	TBR1
2	JJ203	-30.840579905582917	Emx-Cre+;POMT2F/+	Emx-POMT2-Ctrl	Emx-POMT2	TBR1
2	JJ204	-70.02281411654133	Emx-Cre+;POMT2F/+	Emx-POMT2-Ctrl	Emx-POMT2	TBR1
2	JJ205	-138.51013701754388	Emx-Cre+;POMT2F/+	Emx-POMT2-Ctrl	Emx-POMT2	TBR1
2	JJ210	-18.799670526883688	Emx-Cre+;POMT2F/+	Emx-POMT2-Ctrl	Emx-POMT2	TBR1
2	JJ211	3.6799239521221807	Emx-Cre+;POMT2F/+	Emx-POMT2-Ctrl	Emx-POMT2	TBR1
2	JJ212	46.260153734237214	Emx-Cre+;POMT2F/+	Emx-POMT2-Ctrl	Emx-POMT2	TBR1
2	JJ213	179.916340984534	Emx-Cre+;POMT2F/+	Emx-POMT2-Ctrl	Emx-POMT2	TBR1
2	JJ214	-52.94814434628237	DGdelta/-	ICD-Mutant	ICD	TBR1
2	JJ215	52.71996150475002	DGdelta/-	ICD-Mutant	ICD	TBR1
2	JJ216	39.519860390031035	DGdelta/-	ICD-Mutant	ICD	TBR1
2	JJ217	61.77791504819792	DGdelta/-	ICD-Mutant	ICD	TBR1
2	JJ222	-27.775428933286094	WT	ICD-Ctrl	ICD	TBR1
2	JJ223	51.39255719051001	WT	ICD-Ctrl	ICD	TBR1
2	JJ224	-20.434569618561113	WT	ICD-Ctrl	ICD	TBR1
2	JJ225	-46.73727233711338	WT	ICD-Ctrl	ICD	TBR1
2	JJ238	-185.74963093716053	FKRPMut	FKRP-Mutant	FKRP	TBR1
2	JJ239	43.71740397173922	FKRPMut	FKRP-Mutant	FKRP	TBR1
2	JJ240	-158.20050824388682	FKRPMut	FKRP-Mutant	FKRP	TBR1
2	JJ241	-62.031453793081404	FKRPMut	FKRP-Mutant	FKRP	TBR1
2	JJ242	-72.41602393325941	WT	FKRP-Ctrl	FKRP	TBR1
2	JJ243	-103.49911721605811	WT	FKRP-Ctrl	FKRP	TBR1
2	JJ244	-50.24052720532044	WT	FKRP-Ctrl	FKRP	TBR1
2	JJ245	-129.80979835292194	WT	FKRP-Ctrl	FKRP	TBR1
2	JJ246	-201.0758615524692	WT	FKRP-Ctrl	FKRP	TBR1
2	JJ247	-311.2655661882868	WT	FKRP-Ctrl	FKRP	TBR1
2	JJ248	-64.58302796598593	WT	FKRP-Ctrl	FKRP	TBR1
2	JJ249	-117.00994847923944	WT	FKRP-Ctrl	FKRP	TBR1
2	JJ250	325.8486660064703	FKRPMut	FKRP-Mutant	FKRP	TBR1
2	JJ251	271.3185362436425	FKRPMut	FKRP-Mutant	FKRP	TBR1
2	JJ252	324.8293337875252	FKRPMut	FKRP-Mutant	FKRP	TBR1
2	JJ253	297.11061480616013	FKRPMut	FKRP-Mutant	FKRP	TBR1
2	JJ254	87.43771155341881	WT	FKRP-Ctrl	FKRP	TBR1
2	JJ255	-179.5008070310245	WT	FKRP-Ctrl	FKRP	TBR1
2	JJ256	-150.05581134990248	WT	FKRP-Ctrl	FKRP	TBR1
2	JJ257	2.946410546536754	WT	FKRP-Ctrl	FKRP	TBR1
2	JJ310	-100.7028886625274	DGdelta/-	ICD-Mutant	ICD	TBR1
2	JJ311	-28.750291315502977	DGdelta/-	ICD-Mutant	ICD	TBR1
2	JJ312	-4.916838187134545	DGdelta/-	ICD-Mutant	ICD	TBR1
2	JJ313	-35.53748094312581	DGdelta/-	ICD-Mutant	ICD	TBR1
2	JJ318	169.3003296427679	DGdelta/-	ICD-Mutant	ICD	TBR1
2	JJ319	104.40031428648615	DGdelta/-	ICD-Mutant	ICD	TBR1
2	JJ320	135.0302761269963	DGdelta/-	ICD-Mutant	ICD	TBR1
2	JJ321	119.41838277290447	DGdelta/-	ICD-Mutant	ICD	TBR1
2	JJ326	-59.501397545387555	WT	ICD-Ctrl	ICD	TBR1
2	JJ327	-124.19455524192715	WT	ICD-Ctrl	ICD	TBR1
2	JJ328	-18.115092038126363	WT	ICD-Ctrl	ICD	TBR1
2	JJ329	-7.374679799102675	WT	ICD-Ctrl	ICD	TBR1
2	JJ334	317.61149655508257	WT	ICD-Ctrl	ICD	TBR1
2	JJ335	35.26904577422575	WT	ICD-Ctrl	ICD	TBR1
2	JJ336	119.42344303042212	WT	ICD-Ctrl	ICD	TBR1
2	JJ337	171.20524605820106	WT	ICD-Ctrl	ICD	TBR1
2	JJ338	178.9202396680189	FKRPMut	FKRP-Mutant	FKRP	TBR1
2	JJ339	8.787869637635746	FKRPMut	FKRP-Mutant	FKRP	TBR1
2	JJ340	234.48262316761338	FKRPMut	FKRP-Mutant	FKRP	TBR1
2	JJ341	207.36295821020448	FKRPMut	FKRP-Mutant	FKRP	TBR1
2	JJ342	114.6448176532756	WT	FKRP-Ctrl	FKRP	TBR1
2	JJ343	105.8351250725422	WT	FKRP-Ctrl	FKRP	TBR1
2	JJ344	220.9184871170056	WT	FKRP-Ctrl	FKRP	TBR1
2	JJ345	229.27265564870766	WT	FKRP-Ctrl	FKRP	TBR1
2	JJ358	48.214757275132264	Emx-Cre+;DGF/-	Emx-DG-cKO	Emx-DG	TBR1
2	JJ359	-59.24747428334005	Emx-Cre+;DGF/-	Emx-DG-cKO	Emx-DG	TBR1
2	JJ360	116.85538971087105	Emx-Cre+;DGF/-	Emx-DG-cKO	Emx-DG	TBR1
2	JJ361	120.58663644171001	Emx-Cre+;DGF/-	Emx-DG-cKO	Emx-DG	TBR1
2	JJ366	-77.96505754974699	Emx-Cre+;DGF/+	Emx-DG-Ctrl	Emx-DG	TBR1
2	JJ367	-36.304158865761146	Emx-Cre+;DGF/+	Emx-DG-Ctrl	Emx-DG	TBR1
2	JJ368	152.68957199513534	Emx-Cre+;DGF/+	Emx-DG-Ctrl	Emx-DG	TBR1
2	JJ369	9.077191960364493	Emx-Cre+;DGF/+	Emx-DG-Ctrl	Emx-DG	TBR1
2	JJ374	-109.68257768260753	Emx-Cre+;DGF/-	Emx-DG-cKO	Emx-DG	TBR1
2	JJ375	80.39097790150583	Emx-Cre+;DGF/-	Emx-DG-cKO	Emx-DG	TBR1
2	JJ376	430.391214105053	Emx-Cre+;DGF/-	Emx-DG-cKO	Emx-DG	TBR1
2	JJ377	235.2093602847358	Emx-Cre+;DGF/-	Emx-DG-cKO	Emx-DG	TBR1
2	JJ382	-9.72039495832623	Emx-Cre+;DGF/-	Emx-DG-cKO	Emx-DG	TBR1
2	JJ383	348.632299413234	Emx-Cre+;DGF/-	Emx-DG-cKO	Emx-DG	TBR1
2	JJ384	165.26041114432698	Emx-Cre+;DGF/-	Emx-DG-cKO	Emx-DG	TBR1
2	JJ385	344.22153328572364	Emx-Cre+;DGF/-	Emx-DG-cKO	Emx-DG	TBR1
2	JJ389	142.74784864213393	Emx-Cre+;DGF/+	Emx-DG-Ctrl	Emx-DG	TBR1
2	JJ390	212.1682717042788	Emx-Cre+;DGF/+	Emx-DG-Ctrl	Emx-DG	TBR1
2	JJ391	161.63717823735496	Emx-Cre+;DGF/+	Emx-DG-Ctrl	Emx-DG	TBR1
2	JJ396	-24.199771169329892	Emx-Cre+;DGF/+	Emx-DG-Ctrl	Emx-DG	TBR1
2	JJ397	-37.582383238536146	Emx-Cre+;DGF/+	Emx-DG-Ctrl	Emx-DG	TBR1
2	JJ398	150.18725976082249	Emx-Cre+;DGF/+	Emx-DG-Ctrl	Emx-DG	TBR1
2	JJ399	53.199330671136785	Emx-Cre+;DGF/+	Emx-DG-Ctrl	Emx-DG	TBR1
3	JJ009	15.935539721640376	Emx-Cre+;POMT2F/+	Emx-POMT2-Ctrl	Emx-POMT2	TBR1
3	JJ010	-5.061994891394154	Emx-Cre+;POMT2F/+	Emx-POMT2-Ctrl	Emx-POMT2	TBR1
3	JJ011	-40.91601350003801	Emx-Cre+;POMT2F/+	Emx-POMT2-Ctrl	Emx-POMT2	TBR1
3	JJ012	-23.33829846162625	Emx-Cre+;POMT2F/F	Emx-POMT2-cKO	Emx-POMT2	TBR1
3	JJ013	-0.3038406499726231	Emx-Cre+;POMT2F/F	Emx-POMT2-cKO	Emx-POMT2	TBR1
3	JJ014	-30.8397159247062	Emx-Cre+;POMT2F/F	Emx-POMT2-cKO	Emx-POMT2	TBR1
3	JJ015	-45.544662521367535	Emx-Cre+;POMT2F/+	Emx-POMT2-Ctrl	Emx-POMT2	TBR1
3	JJ016	39.47705946360153	Emx-Cre+;POMT2F/F	Emx-POMT2-cKO	Emx-POMT2	TBR1
3	JJ041	92.16369387179488	Emx-Cre+;POMT2F/F	Emx-POMT2-cKO	Emx-POMT2	TBR1
3	JJ042	22.749667824879243	Emx-Cre+;POMT2F/F	Emx-POMT2-cKO	Emx-POMT2	TBR1
3	JJ043	46.154942860182075	Emx-Cre+;POMT2F/F	Emx-POMT2-cKO	Emx-POMT2	TBR1
3	JJ044	58.06553314837337	Emx-Cre+;POMT2F/F	Emx-POMT2-cKO	Emx-POMT2	TBR1
3	JJ045	-36.84775401555174	Emx-Cre+;POMT2F/+	Emx-POMT2-Ctrl	Emx-POMT2	TBR1
3	JJ046	-11.165801919850688	Emx-Cre+;POMT2F/+	Emx-POMT2-Ctrl	Emx-POMT2	TBR1
3	JJ047	-59.68278181596671	Emx-Cre+;POMT2F/+	Emx-POMT2-Ctrl	Emx-POMT2	TBR1
3	JJ048	-34.74231078480458	Emx-Cre+;POMT2F/+	Emx-POMT2-Ctrl	Emx-POMT2	TBR1
3	JJ049	-24.99127017359503	Emx-Cre+;POMT2F/+	Emx-POMT2-Ctrl	Emx-POMT2	TBR1
3	JJ050	14.644096124406436	Emx-Cre+;POMT2F/+	Emx-POMT2-Ctrl	Emx-POMT2	TBR1
3	JJ051	-4.495538247863256	Emx-Cre+;POMT2F/+	Emx-POMT2-Ctrl	Emx-POMT2	TBR1
3	JJ052	-45.86756246777323	Emx-Cre+;POMT2F/+	Emx-POMT2-Ctrl	Emx-POMT2	TBR1
3	JJ061	35.175035663153274	WT	B4GAT1-Ctrl	B4GAT1	TBR1
3	JJ062	29.72255535858586	WT	B4GAT1-Ctrl	B4GAT1	TBR1
3	JJ063	29.261219427158625	WT	B4GAT1-Ctrl	B4GAT1	TBR1
3	JJ064	27.575412821974737	WT	B4GAT1-Ctrl	B4GAT1	TBR1
3	JJ065	43.15209133278599	B4GAT1M155T/M155T;Thy1	B4GAT1-Mutant	B4GAT1	TBR1
3	JJ066	58.381257070976986	B4GAT1M155T/M155T;Thy1	B4GAT1-Mutant	B4GAT1	TBR1
3	JJ067	-18.31356772812373	B4GAT1M155T/M155T;Thy1	B4GAT1-Mutant	B4GAT1	TBR1
3	JJ068	21.64458576794046	B4GAT1M155T/M155T;Thy1	B4GAT1-Mutant	B4GAT1	TBR1
3	JJ078	62.97505689177488	B4GAT1M155T/M155T	B4GAT1-Mutant	B4GAT1	TBR1
3	JJ079	-57.25065679326792	B4GAT1M155T/M155T	B4GAT1-Mutant	B4GAT1	TBR1
3	JJ080	-7.004627073361841	B4GAT1M155T/M155T	B4GAT1-Mutant	B4GAT1	TBR1
3	JJ081	71.58884123422281	B4GAT1M155T/M155T	B4GAT1-Mutant	B4GAT1	TBR1
3	JJ082	31.321292668156673	B4GAT1M155T/M155T;Thy1	B4GAT1-Mutant	B4GAT1	TBR1
3	JJ083	134.53323356793163	B4GAT1M155T/M155T;Thy1	B4GAT1-Mutant	B4GAT1	TBR1
3	JJ084	144.11005914613528	B4GAT1M155T/M155T;Thy1	B4GAT1-Mutant	B4GAT1	TBR1
3	JJ085	69.26268547830921	B4GAT1M155T/M155T;Thy1	B4GAT1-Mutant	B4GAT1	TBR1
3	JJ094	-22.381252411702786	B4GAT1M155T/M155T	B4GAT1-Mutant	B4GAT1	TBR1
3	JJ095	5.504433576965283	B4GAT1M155T/M155T	B4GAT1-Mutant	B4GAT1	TBR1
3	JJ096	5.812479417215646	B4GAT1M155T/M155T	B4GAT1-Mutant	B4GAT1	TBR1
3	JJ097	27.817091312399345	B4GAT1M155T/M155T	B4GAT1-Mutant	B4GAT1	TBR1
3	JJ098	18.118682409274186	B4GAT1M155T/M155T;Thy1	B4GAT1-Mutant	B4GAT1	TBR1
3	JJ099	16.55839445328915	B4GAT1M155T/M155T;Thy1	B4GAT1-Mutant	B4GAT1	TBR1
3	JJ100	13.236222916666653	B4GAT1M155T/M155T;Thy1	B4GAT1-Mutant	B4GAT1	TBR1
3	JJ101	54.934622931940375	B4GAT1M155T/M155T;Thy1	B4GAT1-Mutant	B4GAT1	TBR1
3	JJ102	106.61645969980214	WT	B4GAT1-Ctrl	B4GAT1	TBR1
3	JJ103	9.233802017978158	WT	B4GAT1-Ctrl	B4GAT1	TBR1
3	JJ104	105.07145405616608	WT	B4GAT1-Ctrl	B4GAT1	TBR1
3	JJ105	138.42786310813824	WT	B4GAT1-Ctrl	B4GAT1	TBR1
3	JJ110	198.14783818350807	WT	B4GAT1-Ctrl	B4GAT1	TBR1
3	JJ111	70.17419604350148	WT	B4GAT1-Ctrl	B4GAT1	TBR1
3	JJ112	83.16900268164149	WT	B4GAT1-Ctrl	B4GAT1	TBR1
3	JJ113	142.596531050241	WT	B4GAT1-Ctrl	B4GAT1	TBR1
3	JJ122	111.68848085122943	Emx-Cre+;DGF/-	Emx-DG-cKO	Emx-DG	TBR1
3	JJ123	72.61518606564971	Emx-Cre+;DGF/-	Emx-DG-cKO	Emx-DG	TBR1
3	JJ124	133.12195185672218	Emx-Cre+;DGF/-	Emx-DG-cKO	Emx-DG	TBR1
3	JJ125	92.63889503121327	Emx-Cre+;DGF/-	Emx-DG-cKO	Emx-DG	TBR1
3	JJ142	149.3544370656165	Emx-Cre+;DGF/+	Emx-DG-Ctrl	Emx-DG	TBR1
3	JJ143	238.1893014506497	Emx-Cre+;DGF/+	Emx-DG-Ctrl	Emx-DG	TBR1
3	JJ144	180.2323529646354	Emx-Cre+;DGF/+	Emx-DG-Ctrl	Emx-DG	TBR1
3	JJ145	99.3366945463564	Emx-Cre+;DGF/+	Emx-DG-Ctrl	Emx-DG	TBR1
3	JJ150	30.990069153846168	Emx-Cre+;DGF/-	Emx-DG-cKO	Emx-DG	TBR1
3	JJ151	108.37936354377086	Emx-Cre+;DGF/-	Emx-DG-cKO	Emx-DG	TBR1
3	JJ152	125.1202869120201	Emx-Cre+;DGF/-	Emx-DG-cKO	Emx-DG	TBR1
3	JJ153	85.77574561603944	Emx-Cre+;DGF/-	Emx-DG-cKO	Emx-DG	TBR1
3	JJ166	28.402289150781996	Emx-Cre+;POMT2F/F	Emx-POMT2-cKO	Emx-POMT2	TBR1
3	JJ167	-19.931359295217362	Emx-Cre+;POMT2F/F	Emx-POMT2-cKO	Emx-POMT2	TBR1
3	JJ168	42.15803917092379	Emx-Cre+;POMT2F/F	Emx-POMT2-cKO	Emx-POMT2	TBR1
3	JJ169	-3.326648694098329	Emx-Cre+;POMT2F/F	Emx-POMT2-cKO	Emx-POMT2	TBR1
3	JJ170	-124.27443647014779	Emx-Cre+;POMT2F/+	Emx-POMT2-Ctrl	Emx-POMT2	TBR1
3	JJ171	-88.03097531222961	Emx-Cre+;POMT2F/+	Emx-POMT2-Ctrl	Emx-POMT2	TBR1
3	JJ172	-26.795322855732365	Emx-Cre+;POMT2F/+	Emx-POMT2-Ctrl	Emx-POMT2	TBR1
3	JJ173	-73.58441263885057	Emx-Cre+;POMT2F/+	Emx-POMT2-Ctrl	Emx-POMT2	TBR1
3	JJ194	204.30345524026484	Emx-Cre+;POMT2F/F	Emx-POMT2-cKO	Emx-POMT2	TBR1
3	JJ195	96.65013798170806	Emx-Cre+;POMT2F/F	Emx-POMT2-cKO	Emx-POMT2	TBR1
3	JJ196	19.32965150257807	Emx-Cre+;POMT2F/F	Emx-POMT2-cKO	Emx-POMT2	TBR1
3	JJ197	204.16245293560607	Emx-Cre+;POMT2F/F	Emx-POMT2-cKO	Emx-POMT2	TBR1
3	JJ202	-85.98924792852397	Emx-Cre+;POMT2F/+	Emx-POMT2-Ctrl	Emx-POMT2	TBR1
3	JJ203	-71.69427489737272	Emx-Cre+;POMT2F/+	Emx-POMT2-Ctrl	Emx-POMT2	TBR1
3	JJ204	-30.811067124060134	Emx-Cre+;POMT2F/+	Emx-POMT2-Ctrl	Emx-POMT2	TBR1
3	JJ205	-88.70869228070177	Emx-Cre+;POMT2F/+	Emx-POMT2-Ctrl	Emx-POMT2	TBR1
3	JJ210	155.41552071166666	Emx-Cre+;POMT2F/+	Emx-POMT2-Ctrl	Emx-POMT2	TBR1
3	JJ211	43.19573094535201	Emx-Cre+;POMT2F/+	Emx-POMT2-Ctrl	Emx-POMT2	TBR1
3	JJ212	119.9046955508157	Emx-Cre+;POMT2F/+	Emx-POMT2-Ctrl	Emx-POMT2	TBR1
3	JJ213	187.05300578171213	Emx-Cre+;POMT2F/+	Emx-POMT2-Ctrl	Emx-POMT2	TBR1
3	JJ214	99.16264295530493	DGdelta/-	ICD-Mutant	ICD	TBR1
3	JJ215	86.95124449483403	DGdelta/-	ICD-Mutant	ICD	TBR1
3	JJ216	-14.121526768186982	DGdelta/-	ICD-Mutant	ICD	TBR1
3	JJ217	-6.187351893193939	DGdelta/-	ICD-Mutant	ICD	TBR1
3	JJ222	-18.56966197801906	WT	ICD-Ctrl	ICD	TBR1
3	JJ223	228.16355851768517	WT	ICD-Ctrl	ICD	TBR1
3	JJ224	8.384052534073438	WT	ICD-Ctrl	ICD	TBR1
3	JJ225	34.05584830164131	WT	ICD-Ctrl	ICD	TBR1
3	JJ238	-156.93677093716053	FKRPMut	FKRP-Mutant	FKRP	TBR1
3	JJ239	21.908176716278604	FKRPMut	FKRP-Mutant	FKRP	TBR1
3	JJ240	-73.60940872199535	FKRPMut	FKRP-Mutant	FKRP	TBR1
3	JJ241	20.439852201674665	FKRPMut	FKRP-Mutant	FKRP	TBR1
3	JJ242	-150.510264126775	WT	FKRP-Ctrl	FKRP	TBR1
3	JJ243	-155.65337506629965	WT	FKRP-Ctrl	FKRP	TBR1
3	JJ244	-32.7154454462	WT	FKRP-Ctrl	FKRP	TBR1
3	JJ245	-94.75143612034775	WT	FKRP-Ctrl	FKRP	TBR1
3	JJ246	-218.72510908333342	WT	FKRP-Ctrl	FKRP	TBR1
3	JJ247	-111.7087198390805	WT	FKRP-Ctrl	FKRP	TBR1
3	JJ248	24.33639251671036	WT	FKRP-Ctrl	FKRP	TBR1
3	JJ249	-30.803701826051945	WT	FKRP-Ctrl	FKRP	TBR1
3	JJ250	111.93741985262416	FKRPMut	FKRP-Mutant	FKRP	TBR1
3	JJ251	111.21164859638543	FKRPMut	FKRP-Mutant	FKRP	TBR1
3	JJ252	197.04241504778784	FKRPMut	FKRP-Mutant	FKRP	TBR1
3	JJ253	253.1709907108005	FKRPMut	FKRP-Mutant	FKRP	TBR1
3	JJ254	-1.2558059679486935	WT	FKRP-Ctrl	FKRP	TBR1
3	JJ255	-71.3615345346321	WT	FKRP-Ctrl	FKRP	TBR1
3	JJ256	-30.820656281676445	WT	FKRP-Ctrl	FKRP	TBR1
3	JJ257	79.09514088564212	WT	FKRP-Ctrl	FKRP	TBR1
3	JJ310	-33.40728144030519	DGdelta/-	ICD-Mutant	ICD	TBR1
3	JJ311	74.83763592325863	DGdelta/-	ICD-Mutant	ICD	TBR1
3	JJ312	77.96346795321635	DGdelta/-	ICD-Mutant	ICD	TBR1
3	JJ313	120.9330842443527	DGdelta/-	ICD-Mutant	ICD	TBR1
3	JJ318	103.72516297610123	DGdelta/-	ICD-Mutant	ICD	TBR1
3	JJ319	60.83542817537508	DGdelta/-	ICD-Mutant	ICD	TBR1
3	JJ320	118.05949110284173	DGdelta/-	ICD-Mutant	ICD	TBR1
3	JJ321	164.42864903873738	DGdelta/-	ICD-Mutant	ICD	TBR1
3	JJ326	28.487532078628266	WT	ICD-Ctrl	ICD	TBR1
3	JJ327	-81.88799150107036	WT	ICD-Ctrl	ICD	TBR1
3	JJ328	52.64342539049422	WT	ICD-Ctrl	ICD	TBR1
3	JJ329	48.462338365447636	WT	ICD-Ctrl	ICD	TBR1
3	JJ334	328.20798956207557	WT	ICD-Ctrl	ICD	TBR1
3	JJ335	180.293339020979	WT	ICD-Ctrl	ICD	TBR1
3	JJ336	115.68124899040508	WT	ICD-Ctrl	ICD	TBR1
3	JJ337	262.7687799449614	WT	ICD-Ctrl	ICD	TBR1
3	JJ338	157.17611925334583	FKRPMut	FKRP-Mutant	FKRP	TBR1
3	JJ339	131.04916447472849	FKRPMut	FKRP-Mutant	FKRP	TBR1
3	JJ340	62.92512623553307	FKRPMut	FKRP-Mutant	FKRP	TBR1
3	JJ341	205.86739951931176	FKRPMut	FKRP-Mutant	FKRP	TBR1
3	JJ342	160.1047629336657	WT	FKRP-Ctrl	FKRP	TBR1
3	JJ343	195.912403157742	WT	FKRP-Ctrl	FKRP	TBR1
3	JJ344	277.78310839905686	WT	FKRP-Ctrl	FKRP	TBR1
3	JJ345	226.91734616594906	WT	FKRP-Ctrl	FKRP	TBR1
3	JJ358	-0.529828262786585	Emx-Cre+;DGF/-	Emx-DG-cKO	Emx-DG	TBR1
3	JJ359	-81.26149736975988	Emx-Cre+;DGF/-	Emx-DG-cKO	Emx-DG	TBR1
3	JJ360	26.13689477039486	Emx-Cre+;DGF/-	Emx-DG-cKO	Emx-DG	TBR1
3	JJ361	92.07192546287403	Emx-Cre+;DGF/-	Emx-DG-cKO	Emx-DG	TBR1
3	JJ366	55.9096615668852	Emx-Cre+;DGF/+	Emx-DG-Ctrl	Emx-DG	TBR1
3	JJ367	-162.24485848998754	Emx-Cre+;DGF/+	Emx-DG-Ctrl	Emx-DG	TBR1
3	JJ368	-41.55266046660586	Emx-Cre+;DGF/+	Emx-DG-Ctrl	Emx-DG	TBR1
3	JJ369	222.7664821997145	Emx-Cre+;DGF/+	Emx-DG-Ctrl	Emx-DG	TBR1
3	JJ374	-13.121166818410037	Emx-Cre+;DGF/-	Emx-DG-cKO	Emx-DG	TBR1
3	JJ375	307.4896506704653	Emx-Cre+;DGF/-	Emx-DG-cKO	Emx-DG	TBR1
3	JJ376	310.89590471705543	Emx-Cre+;DGF/-	Emx-DG-cKO	Emx-DG	TBR1
3	JJ377	248.18341227664374	Emx-Cre+;DGF/-	Emx-DG-cKO	Emx-DG	TBR1
3	JJ382	52.555378353387916	Emx-Cre+;DGF/-	Emx-DG-cKO	Emx-DG	TBR1
3	JJ383	233.30721048247554	Emx-Cre+;DGF/-	Emx-DG-cKO	Emx-DG	TBR1
3	JJ384	155.17098066601775	Emx-Cre+;DGF/-	Emx-DG-cKO	Emx-DG	TBR1
3	JJ385	213.5273420659951	Emx-Cre+;DGF/-	Emx-DG-cKO	Emx-DG	TBR1
3	JJ389	186.32198158037548	Emx-Cre+;DGF/+	Emx-DG-Ctrl	Emx-DG	TBR1
3	JJ390	161.19453075713338	Emx-Cre+;DGF/+	Emx-DG-Ctrl	Emx-DG	TBR1
3	JJ391	322.34954430758904	Emx-Cre+;DGF/+	Emx-DG-Ctrl	Emx-DG	TBR1
3	JJ396	-11.276199577810795	Emx-Cre+;DGF/+	Emx-DG-Ctrl	Emx-DG	TBR1
3	JJ397	64.37230057098763	Emx-Cre+;DGF/+	Emx-DG-Ctrl	Emx-DG	TBR1
3	JJ398	104.07608079256852	Emx-Cre+;DGF/+	Emx-DG-Ctrl	Emx-DG	TBR1
3	JJ399	86.03511498163304	Emx-Cre+;DGF/+	Emx-DG-Ctrl	Emx-DG	TBR1
4	JJ009	31.07936695247406	Emx-Cre+;POMT2F/+	Emx-POMT2-Ctrl	Emx-POMT2	TBR1
4	JJ010	41.70570820985241	Emx-Cre+;POMT2F/+	Emx-POMT2-Ctrl	Emx-POMT2	TBR1
4	JJ011	-13.984660286379684	Emx-Cre+;POMT2F/+	Emx-POMT2-Ctrl	Emx-POMT2	TBR1
4	JJ012	-36.05700214586818	Emx-Cre+;POMT2F/F	Emx-POMT2-cKO	Emx-POMT2	TBR1
4	JJ013	54.021600817521154	Emx-Cre+;POMT2F/F	Emx-POMT2-cKO	Emx-POMT2	TBR1
4	JJ014	-48.77901648493029	Emx-Cre+;POMT2F/F	Emx-POMT2-cKO	Emx-POMT2	TBR1
4	JJ015	6.209333205128189	Emx-Cre+;POMT2F/+	Emx-POMT2-Ctrl	Emx-POMT2	TBR1
4	JJ016	-10.869222528735653	Emx-Cre+;POMT2F/F	Emx-POMT2-cKO	Emx-POMT2	TBR1
4	JJ041	81.1439036153846	Emx-Cre+;POMT2F/F	Emx-POMT2-cKO	Emx-POMT2	TBR1
4	JJ042	133.51521432246378	Emx-Cre+;POMT2F/F	Emx-POMT2-cKO	Emx-POMT2	TBR1
4	JJ043	88.25292723030473	Emx-Cre+;POMT2F/F	Emx-POMT2-cKO	Emx-POMT2	TBR1
4	JJ044	103.9596948912199	Emx-Cre+;POMT2F/F	Emx-POMT2-cKO	Emx-POMT2	TBR1
4	JJ045	-48.18255939857452	Emx-Cre+;POMT2F/+	Emx-POMT2-Ctrl	Emx-POMT2	TBR1
4	JJ046	-20.578456026130862	Emx-Cre+;POMT2F/+	Emx-POMT2-Ctrl	Emx-POMT2	TBR1
4	JJ047	-18.68234431581008	Emx-Cre+;POMT2F/+	Emx-POMT2-Ctrl	Emx-POMT2	TBR1
4	JJ048	-18.854701757575793	Emx-Cre+;POMT2F/+	Emx-POMT2-Ctrl	Emx-POMT2	TBR1
4	JJ049	30.69392295511534	Emx-Cre+;POMT2F/+	Emx-POMT2-Ctrl	Emx-POMT2	TBR1
4	JJ050	3.0122009107312238	Emx-Cre+;POMT2F/+	Emx-POMT2-Ctrl	Emx-POMT2	TBR1
4	JJ051	32.06962082146248	Emx-Cre+;POMT2F/+	Emx-POMT2-Ctrl	Emx-POMT2	TBR1
4	JJ052	-24.566307724183485	Emx-Cre+;POMT2F/+	Emx-POMT2-Ctrl	Emx-POMT2	TBR1
4	JJ061	21.30578982311034	WT	B4GAT1-Ctrl	B4GAT1	TBR1
4	JJ062	21.232129666886255	WT	B4GAT1-Ctrl	B4GAT1	TBR1
4	JJ063	8.489760099364238	WT	B4GAT1-Ctrl	B4GAT1	TBR1
4	JJ064	23.76386124889629	WT	B4GAT1-Ctrl	B4GAT1	TBR1
4	JJ065	58.100520478927216	B4GAT1M155T/M155T;Thy1	B4GAT1-Mutant	B4GAT1	TBR1
4	JJ066	37.82968734715834	B4GAT1M155T/M155T;Thy1	B4GAT1-Mutant	B4GAT1	TBR1
4	JJ067	-25.488417618233616	B4GAT1M155T/M155T;Thy1	B4GAT1-Mutant	B4GAT1	TBR1
4	JJ068	24.949323080381106	B4GAT1M155T/M155T;Thy1	B4GAT1-Mutant	B4GAT1	TBR1
4	JJ078	50.90856086002884	B4GAT1M155T/M155T	B4GAT1-Mutant	B4GAT1	TBR1
4	JJ079	-54.281118077608916	B4GAT1M155T/M155T	B4GAT1-Mutant	B4GAT1	TBR1
4	JJ080	46.65159385751887	B4GAT1M155T/M155T	B4GAT1-Mutant	B4GAT1	TBR1
4	JJ081	66.94462771033663	B4GAT1M155T/M155T	B4GAT1-Mutant	B4GAT1	TBR1
4	JJ082	13.20282362053761	B4GAT1M155T/M155T;Thy1	B4GAT1-Mutant	B4GAT1	TBR1
4	JJ083	73.56876650595997	B4GAT1M155T/M155T;Thy1	B4GAT1-Mutant	B4GAT1	TBR1
4	JJ084	132.22929402536232	B4GAT1M155T/M155T;Thy1	B4GAT1-Mutant	B4GAT1	TBR1
4	JJ085	17.05943816648126	B4GAT1M155T/M155T;Thy1	B4GAT1-Mutant	B4GAT1	TBR1
4	JJ094	54.32247802466291	B4GAT1M155T/M155T	B4GAT1-Mutant	B4GAT1	TBR1
4	JJ095	-8.457190722551616	B4GAT1M155T/M155T	B4GAT1-Mutant	B4GAT1	TBR1
4	JJ096	-4.748004109354402	B4GAT1M155T/M155T	B4GAT1-Mutant	B4GAT1	TBR1
4	JJ097	114.51017178434284	B4GAT1M155T/M155T	B4GAT1-Mutant	B4GAT1	TBR1
4	JJ098	33.63700129368281	B4GAT1M155T/M155T;Thy1	B4GAT1-Mutant	B4GAT1	TBR1
4	JJ099	38.8125068814501	B4GAT1M155T/M155T;Thy1	B4GAT1-Mutant	B4GAT1	TBR1
4	JJ100	25.00159412878789	B4GAT1M155T/M155T;Thy1	B4GAT1-Mutant	B4GAT1	TBR1
4	JJ101	35.065569270324204	B4GAT1M155T/M155T;Thy1	B4GAT1-Mutant	B4GAT1	TBR1
4	JJ102	81.57931033740545	WT	B4GAT1-Ctrl	B4GAT1	TBR1
4	JJ103	21.837757024083164	WT	B4GAT1-Ctrl	B4GAT1	TBR1
4	JJ104	119.22397407651609	WT	B4GAT1-Ctrl	B4GAT1	TBR1
4	JJ105	274.2409203359346	WT	B4GAT1-Ctrl	B4GAT1	TBR1
4	JJ110	152.09766433931904	WT	B4GAT1-Ctrl	B4GAT1	TBR1
4	JJ111	131.35158838066624	WT	B4GAT1-Ctrl	B4GAT1	TBR1
4	JJ112	85.89055442332251	WT	B4GAT1-Ctrl	B4GAT1	TBR1
4	JJ113	186.62010897909047	WT	B4GAT1-Ctrl	B4GAT1	TBR1
4	JJ122	157.54158161375662	Emx-Cre+;DGF/-	Emx-DG-cKO	Emx-DG	TBR1
4	JJ123	60.535555493426614	Emx-Cre+;DGF/-	Emx-DG-cKO	Emx-DG	TBR1
4	JJ124	148.42046279818007	Emx-Cre+;DGF/-	Emx-DG-cKO	Emx-DG	TBR1
4	JJ125	126.0587241817924	Emx-Cre+;DGF/-	Emx-DG-cKO	Emx-DG	TBR1
4	JJ142	17.765899359129474	Emx-Cre+;DGF/+	Emx-DG-Ctrl	Emx-DG	TBR1
4	JJ143	217.9916380831668	Emx-Cre+;DGF/+	Emx-DG-Ctrl	Emx-DG	TBR1
4	JJ144	179.3693542113665	Emx-Cre+;DGF/+	Emx-DG-Ctrl	Emx-DG	TBR1
4	JJ145	156.98595890422078	Emx-Cre+;DGF/+	Emx-DG-Ctrl	Emx-DG	TBR1
4	JJ150	55.83558584900288	Emx-Cre+;DGF/-	Emx-DG-cKO	Emx-DG	TBR1
4	JJ151	142.63026603959955	Emx-Cre+;DGF/-	Emx-DG-cKO	Emx-DG	TBR1
4	JJ152	197.79813965113286	Emx-Cre+;DGF/-	Emx-DG-cKO	Emx-DG	TBR1
4	JJ153	91.21706485887098	Emx-Cre+;DGF/-	Emx-DG-cKO	Emx-DG	TBR1
4	JJ166	28.713440274926693	Emx-Cre+;POMT2F/F	Emx-POMT2-cKO	Emx-POMT2	TBR1
4	JJ167	1.5691644125673367	Emx-Cre+;POMT2F/F	Emx-POMT2-cKO	Emx-POMT2	TBR1
4	JJ168	35.96147239782888	Emx-Cre+;POMT2F/F	Emx-POMT2-cKO	Emx-POMT2	TBR1
4	JJ169	-30.52521877684406	Emx-Cre+;POMT2F/F	Emx-POMT2-cKO	Emx-POMT2	TBR1
4	JJ170	-83.1416112975819	Emx-Cre+;POMT2F/+	Emx-POMT2-Ctrl	Emx-POMT2	TBR1
4	JJ171	-57.94051310731053	Emx-Cre+;POMT2F/+	Emx-POMT2-Ctrl	Emx-POMT2	TBR1
4	JJ172	-33.42273499395814	Emx-Cre+;POMT2F/+	Emx-POMT2-Ctrl	Emx-POMT2	TBR1
4	JJ173	-79.20337778911251	Emx-Cre+;POMT2F/+	Emx-POMT2-Ctrl	Emx-POMT2	TBR1
4	JJ194	401.7725206173117	Emx-Cre+;POMT2F/F	Emx-POMT2-cKO	Emx-POMT2	TBR1
4	JJ195	144.13126357804967	Emx-Cre+;POMT2F/F	Emx-POMT2-cKO	Emx-POMT2	TBR1
4	JJ196	212.1964967701671	Emx-Cre+;POMT2F/F	Emx-POMT2-cKO	Emx-POMT2	TBR1
4	JJ197	102.71952574086458	Emx-Cre+;POMT2F/F	Emx-POMT2-cKO	Emx-POMT2	TBR1
4	JJ202	-19.797346507191588	Emx-Cre+;POMT2F/+	Emx-POMT2-Ctrl	Emx-POMT2	TBR1
4	JJ203	17.011422557471292	Emx-Cre+;POMT2F/+	Emx-POMT2-Ctrl	Emx-POMT2	TBR1
4	JJ204	1.2900176294904213	Emx-Cre+;POMT2F/+	Emx-POMT2-Ctrl	Emx-POMT2	TBR1
4	JJ205	-35.81986070175443	Emx-Cre+;POMT2F/+	Emx-POMT2-Ctrl	Emx-POMT2	TBR1
4	JJ210	-53.29886477220422	Emx-Cre+;POMT2F/+	Emx-POMT2-Ctrl	Emx-POMT2	TBR1
4	JJ211	155.21409245440444	Emx-Cre+;POMT2F/+	Emx-POMT2-Ctrl	Emx-POMT2	TBR1
4	JJ212	54.743250694113726	Emx-Cre+;POMT2F/+	Emx-POMT2-Ctrl	Emx-POMT2	TBR1
4	JJ213	230.16896479405776	Emx-Cre+;POMT2F/+	Emx-POMT2-Ctrl	Emx-POMT2	TBR1
4	JJ214	-33.00832199874689	DGdelta/-	ICD-Mutant	ICD	TBR1
4	JJ215	14.212951474239011	DGdelta/-	ICD-Mutant	ICD	TBR1
4	JJ216	84.6360337233644	DGdelta/-	ICD-Mutant	ICD	TBR1
4	JJ217	-156.18216124606332	DGdelta/-	ICD-Mutant	ICD	TBR1
4	JJ222	-111.02015118436832	WT	ICD-Ctrl	ICD	TBR1
4	JJ223	20.014219661179443	WT	ICD-Ctrl	ICD	TBR1
4	JJ224	170.96263099872286	WT	ICD-Ctrl	ICD	TBR1
4	JJ225	122.21586742402458	WT	ICD-Ctrl	ICD	TBR1
4	JJ238	-78.69132568264494	FKRPMut	FKRP-Mutant	FKRP	TBR1
4	JJ239	0.9832878044667268	FKRPMut	FKRP-Mutant	FKRP	TBR1
4	JJ240	-129.59450159621352	FKRPMut	FKRP-Mutant	FKRP	TBR1
4	JJ241	-6.886058541302494	FKRPMut	FKRP-Mutant	FKRP	TBR1
4	JJ242	-112.35980417529329	WT	FKRP-Ctrl	FKRP	TBR1
4	JJ243	-122.15505743344947	WT	FKRP-Ctrl	FKRP	TBR1
4	JJ244	-103.87744267031523	WT	FKRP-Ctrl	FKRP	TBR1
4	JJ245	-69.2456168954905	WT	FKRP-Ctrl	FKRP	TBR1
4	JJ246	-253.48339531790126	WT	FKRP-Ctrl	FKRP	TBR1
4	JJ247	-36.26638237876303	WT	FKRP-Ctrl	FKRP	TBR1
4	JJ248	-48.10203148155199	WT	FKRP-Ctrl	FKRP	TBR1
4	JJ249	-122.61895704895028	WT	FKRP-Ctrl	FKRP	TBR1
4	JJ250	196.8000403654446	FKRPMut	FKRP-Mutant	FKRP	TBR1
4	JJ251	74.6706864267926	FKRPMut	FKRP-Mutant	FKRP	TBR1
4	JJ252	271.60846140452026	FKRPMut	FKRP-Mutant	FKRP	TBR1
4	JJ253	232.00220441876135	FKRPMut	FKRP-Mutant	FKRP	TBR1
4	JJ254	-38.79327735757435	WT	FKRP-Ctrl	FKRP	TBR1
4	JJ255	89.08636673520914	WT	FKRP-Ctrl	FKRP	TBR1
4	JJ256	105.02807753898635	WT	FKRP-Ctrl	FKRP	TBR1
4	JJ257	56.45933078463205	WT	FKRP-Ctrl	FKRP	TBR1
4	JJ310	26.94688104307564	DGdelta/-	ICD-Mutant	ICD	TBR1
4	JJ311	37.8988613581602	DGdelta/-	ICD-Mutant	ICD	TBR1
4	JJ312	86.97229777777773	DGdelta/-	ICD-Mutant	ICD	TBR1
4	JJ313	33.72614742518059	DGdelta/-	ICD-Mutant	ICD	TBR1
4	JJ318	71.43711194467649	DGdelta/-	ICD-Mutant	ICD	TBR1
4	JJ319	288.04239206426394	DGdelta/-	ICD-Mutant	ICD	TBR1
4	JJ320	245.96960838069268	DGdelta/-	ICD-Mutant	ICD	TBR1
4	JJ321	217.62647375414545	DGdelta/-	ICD-Mutant	ICD	TBR1
4	JJ326	38.103692350827295	WT	ICD-Ctrl	ICD	TBR1
4	JJ327	45.075847160767616	WT	ICD-Ctrl	ICD	TBR1
4	JJ328	113.34237455114094	WT	ICD-Ctrl	ICD	TBR1
4	JJ329	171.3864955048862	WT	ICD-Ctrl	ICD	TBR1
4	JJ334	281.6154691404682	WT	ICD-Ctrl	ICD	TBR1
4	JJ335	196.12121178155178	WT	ICD-Ctrl	ICD	TBR1
4	JJ336	108.51036506271082	WT	ICD-Ctrl	ICD	TBR1
4	JJ337	204.39497568783065	WT	ICD-Ctrl	ICD	TBR1
4	JJ338	145.2962675787047	FKRPMut	FKRP-Mutant	FKRP	TBR1
4	JJ339	237.77727361424397	FKRPMut	FKRP-Mutant	FKRP	TBR1
4	JJ340	105.56911665560683	FKRPMut	FKRP-Mutant	FKRP	TBR1
4	JJ341	204.76658467673306	FKRPMut	FKRP-Mutant	FKRP	TBR1
4	JJ342	324.04801437044733	WT	FKRP-Ctrl	FKRP	TBR1
4	JJ343	252.22007948624446	WT	FKRP-Ctrl	FKRP	TBR1
4	JJ344	301.76879378367227	WT	FKRP-Ctrl	FKRP	TBR1
4	JJ345	249.9687726027307	WT	FKRP-Ctrl	FKRP	TBR1
4	JJ358	0.9612334656084537	Emx-Cre+;DGF/-	Emx-DG-cKO	Emx-DG	TBR1
4	JJ359	39.45538788054542	Emx-Cre+;DGF/-	Emx-DG-cKO	Emx-DG	TBR1
4	JJ360	96.03731590134718	Emx-Cre+;DGF/-	Emx-DG-cKO	Emx-DG	TBR1
4	JJ361	26.634023346471963	Emx-Cre+;DGF/-	Emx-DG-cKO	Emx-DG	TBR1
4	JJ366	124.88238085605015	Emx-Cre+;DGF/+	Emx-DG-Ctrl	Emx-DG	TBR1
4	JJ367	54.77629362711631	Emx-Cre+;DGF/+	Emx-DG-Ctrl	Emx-DG	TBR1
4	JJ368	114.89669741319547	Emx-Cre+;DGF/+	Emx-DG-Ctrl	Emx-DG	TBR1
4	JJ369	218.57572341622748	Emx-Cre+;DGF/+	Emx-DG-Ctrl	Emx-DG	TBR1
4	JJ374	96.16090506871524	Emx-Cre+;DGF/-	Emx-DG-cKO	Emx-DG	TBR1
4	JJ375	377.7427393300773	Emx-Cre+;DGF/-	Emx-DG-cKO	Emx-DG	TBR1
4	JJ376	345.3004574320612	Emx-Cre+;DGF/-	Emx-DG-cKO	Emx-DG	TBR1
4	JJ377	413.7272737923611	Emx-Cre+;DGF/-	Emx-DG-cKO	Emx-DG	TBR1
4	JJ382	131.5597230453149	Emx-Cre+;DGF/-	Emx-DG-cKO	Emx-DG	TBR1
4	JJ383	248.72729503933633	Emx-Cre+;DGF/-	Emx-DG-cKO	Emx-DG	TBR1
4	JJ384	292.48144006535034	Emx-Cre+;DGF/-	Emx-DG-cKO	Emx-DG	TBR1
4	JJ385	195.96797918857865	Emx-Cre+;DGF/-	Emx-DG-cKO	Emx-DG	TBR1
4	JJ389	40.50453442856974	Emx-Cre+;DGF/+	Emx-DG-Ctrl	Emx-DG	TBR1
4	JJ390	305.7601486884058	Emx-Cre+;DGF/+	Emx-DG-Ctrl	Emx-DG	TBR1
4	JJ391	516.3553161507699	Emx-Cre+;DGF/+	Emx-DG-Ctrl	Emx-DG	TBR1
4	JJ396	123.00583591601635	Emx-Cre+;DGF/+	Emx-DG-Ctrl	Emx-DG	TBR1
4	JJ397	102.8641366027337	Emx-Cre+;DGF/+	Emx-DG-Ctrl	Emx-DG	TBR1
4	JJ398	222.67260857034634	Emx-Cre+;DGF/+	Emx-DG-Ctrl	Emx-DG	TBR1
4	JJ399	128.35493528874136	Emx-Cre+;DGF/+	Emx-DG-Ctrl	Emx-DG	TBR1
5	JJ009	22.368873962668186	Emx-Cre+;POMT2F/+	Emx-POMT2-Ctrl	Emx-POMT2	TBR1
5	JJ010	31.65798418025882	Emx-Cre+;POMT2F/+	Emx-POMT2-Ctrl	Emx-POMT2	TBR1
5	JJ011	-55.0765264556814	Emx-Cre+;POMT2F/+	Emx-POMT2-Ctrl	Emx-POMT2	TBR1
5	JJ012	-22.294429542745565	Emx-Cre+;POMT2F/F	Emx-POMT2-cKO	Emx-POMT2	TBR1
5	JJ013	32.347803438697326	Emx-Cre+;POMT2F/F	Emx-POMT2-cKO	Emx-POMT2	TBR1
5	JJ014	-23.4583932196482	Emx-Cre+;POMT2F/F	Emx-POMT2-cKO	Emx-POMT2	TBR1
5	JJ015	13.626224017094046	Emx-Cre+;POMT2F/+	Emx-POMT2-Ctrl	Emx-POMT2	TBR1
5	JJ016	3.538717318007665	Emx-Cre+;POMT2F/F	Emx-POMT2-cKO	Emx-POMT2	TBR1
5	JJ041	76.76926617948719	Emx-Cre+;POMT2F/F	Emx-POMT2-cKO	Emx-POMT2	TBR1
5	JJ042	65.67700357367151	Emx-Cre+;POMT2F/F	Emx-POMT2-cKO	Emx-POMT2	TBR1
5	JJ043	63.53920714483464	Emx-Cre+;POMT2F/F	Emx-POMT2-cKO	Emx-POMT2	TBR1
5	JJ044	87.79294939697984	Emx-Cre+;POMT2F/F	Emx-POMT2-cKO	Emx-POMT2	TBR1
5	JJ045	-0.47319199001689566	Emx-Cre+;POMT2F/+	Emx-POMT2-Ctrl	Emx-POMT2	TBR1
5	JJ046	10.258570640535785	Emx-Cre+;POMT2F/+	Emx-POMT2-Ctrl	Emx-POMT2	TBR1
5	JJ047	-26.067492844364853	Emx-Cre+;POMT2F/+	Emx-POMT2-Ctrl	Emx-POMT2	TBR1
5	JJ048	-50.52689365700485	Emx-Cre+;POMT2F/+	Emx-POMT2-Ctrl	Emx-POMT2	TBR1
5	JJ049	47.90019415071413	Emx-Cre+;POMT2F/+	Emx-POMT2-Ctrl	Emx-POMT2	TBR1
5	JJ050	30.76539014150046	Emx-Cre+;POMT2F/+	Emx-POMT2-Ctrl	Emx-POMT2	TBR1
5	JJ051	93.70148739316238	Emx-Cre+;POMT2F/+	Emx-POMT2-Ctrl	Emx-POMT2	TBR1
5	JJ052	20.85962348540403	Emx-Cre+;POMT2F/+	Emx-POMT2-Ctrl	Emx-POMT2	TBR1
5	JJ061	11.559043043722255	WT	B4GAT1-Ctrl	B4GAT1	TBR1
5	JJ062	46.269196913263066	WT	B4GAT1-Ctrl	B4GAT1	TBR1
5	JJ063	48.692756911896105	WT	B4GAT1-Ctrl	B4GAT1	TBR1
5	JJ064	0.6125142103486496	WT	B4GAT1-Ctrl	B4GAT1	TBR1
5	JJ065	33.80476683908046	B4GAT1M155T/M155T;Thy1	B4GAT1-Mutant	B4GAT1	TBR1
5	JJ066	30.30559753500424	B4GAT1M155T/M155T;Thy1	B4GAT1-Mutant	B4GAT1	TBR1
5	JJ067	-28.603401501017498	B4GAT1M155T/M155T;Thy1	B4GAT1-Mutant	B4GAT1	TBR1
5	JJ068	1.7450313234960124	B4GAT1M155T/M155T;Thy1	B4GAT1-Mutant	B4GAT1	TBR1
5	JJ078	81.52231982106782	B4GAT1M155T/M155T	B4GAT1-Mutant	B4GAT1	TBR1
5	JJ079	-14.785981152805315	B4GAT1M155T/M155T	B4GAT1-Mutant	B4GAT1	TBR1
5	JJ080	82.97715219085222	B4GAT1M155T/M155T	B4GAT1-Mutant	B4GAT1	TBR1
5	JJ081	78.01668966417448	B4GAT1M155T/M155T	B4GAT1-Mutant	B4GAT1	TBR1
5	JJ082	-23.137666855652867	B4GAT1M155T/M155T;Thy1	B4GAT1-Mutant	B4GAT1	TBR1
5	JJ083	77.43818524341663	B4GAT1M155T/M155T;Thy1	B4GAT1-Mutant	B4GAT1	TBR1
5	JJ084	144.74478624758456	B4GAT1M155T/M155T;Thy1	B4GAT1-Mutant	B4GAT1	TBR1
5	JJ085	30.369091868125064	B4GAT1M155T/M155T;Thy1	B4GAT1-Mutant	B4GAT1	TBR1
5	JJ094	-1.2965731942595464	B4GAT1M155T/M155T	B4GAT1-Mutant	B4GAT1	TBR1
5	JJ095	1.6507200020860562	B4GAT1M155T/M155T	B4GAT1-Mutant	B4GAT1	TBR1
5	JJ096	-15.754435382960006	B4GAT1M155T/M155T	B4GAT1-Mutant	B4GAT1	TBR1
5	JJ097	22.1182136783104	B4GAT1M155T/M155T	B4GAT1-Mutant	B4GAT1	TBR1
5	JJ098	102.7030644657258	B4GAT1M155T/M155T;Thy1	B4GAT1-Mutant	B4GAT1	TBR1
5	JJ099	-6.6974279883126355	B4GAT1M155T/M155T;Thy1	B4GAT1-Mutant	B4GAT1	TBR1
5	JJ100	9.465139583333325	B4GAT1M155T/M155T;Thy1	B4GAT1-Mutant	B4GAT1	TBR1
5	JJ101	80.60726466173834	B4GAT1M155T/M155T;Thy1	B4GAT1-Mutant	B4GAT1	TBR1
5	JJ102	215.2047930952473	WT	B4GAT1-Ctrl	B4GAT1	TBR1
5	JJ103	112.57760431956545	WT	B4GAT1-Ctrl	B4GAT1	TBR1
5	JJ104	139.21517783109482	WT	B4GAT1-Ctrl	B4GAT1	TBR1
5	JJ105	138.5735111014493	WT	B4GAT1-Ctrl	B4GAT1	TBR1
5	JJ110	121.38996109538549	WT	B4GAT1-Ctrl	B4GAT1	TBR1
5	JJ111	114.0354753886774	WT	B4GAT1-Ctrl	B4GAT1	TBR1
5	JJ112	118.61370339248872	WT	B4GAT1-Ctrl	B4GAT1	TBR1
5	JJ113	137.26517029402157	WT	B4GAT1-Ctrl	B4GAT1	TBR1
5	JJ122	56.14311894646752	Emx-Cre+;DGF/-	Emx-DG-cKO	Emx-DG	TBR1
5	JJ123	118.066757702838	Emx-Cre+;DGF/-	Emx-DG-cKO	Emx-DG	TBR1
5	JJ124	116.5805692173371	Emx-Cre+;DGF/-	Emx-DG-cKO	Emx-DG	TBR1
5	JJ125	149.84901481678824	Emx-Cre+;DGF/-	Emx-DG-cKO	Emx-DG	TBR1
5	JJ142	164.83476587558343	Emx-Cre+;DGF/+	Emx-DG-Ctrl	Emx-DG	TBR1
5	JJ143	285.1567085579294	Emx-Cre+;DGF/+	Emx-DG-Ctrl	Emx-DG	TBR1
5	JJ144	225.46784490345433	Emx-Cre+;DGF/+	Emx-DG-Ctrl	Emx-DG	TBR1
5	JJ145	-31.618318152056265	Emx-Cre+;DGF/+	Emx-DG-Ctrl	Emx-DG	TBR1
5	JJ150	89.63552780531813	Emx-Cre+;DGF/-	Emx-DG-cKO	Emx-DG	TBR1
5	JJ151	232.404909187921	Emx-Cre+;DGF/-	Emx-DG-cKO	Emx-DG	TBR1
5	JJ152	255.74206114753767	Emx-Cre+;DGF/-	Emx-DG-cKO	Emx-DG	TBR1
5	JJ153	124.31725027553762	Emx-Cre+;DGF/-	Emx-DG-cKO	Emx-DG	TBR1
5	JJ166	68.50844190412185	Emx-Cre+;POMT2F/F	Emx-POMT2-cKO	Emx-POMT2	TBR1
5	JJ167	31.520850402566946	Emx-Cre+;POMT2F/F	Emx-POMT2-cKO	Emx-POMT2	TBR1
5	JJ168	31.453451869336504	Emx-Cre+;POMT2F/F	Emx-POMT2-cKO	Emx-POMT2	TBR1
5	JJ169	-7.118217464825004	Emx-Cre+;POMT2F/F	Emx-POMT2-cKO	Emx-POMT2	TBR1
5	JJ170	-51.52533735882381	Emx-Cre+;POMT2F/+	Emx-POMT2-Ctrl	Emx-POMT2	TBR1
5	JJ171	-60.11689077385362	Emx-Cre+;POMT2F/+	Emx-POMT2-Ctrl	Emx-POMT2	TBR1
5	JJ172	-72.39269862496315	Emx-Cre+;POMT2F/+	Emx-POMT2-Ctrl	Emx-POMT2	TBR1
5	JJ173	-60.743188707226636	Emx-Cre+;POMT2F/+	Emx-POMT2-Ctrl	Emx-POMT2	TBR1
5	JJ194	269.0326130342068	Emx-Cre+;POMT2F/F	Emx-POMT2-cKO	Emx-POMT2	TBR1
5	JJ195	295.9631620825608	Emx-Cre+;POMT2F/F	Emx-POMT2-cKO	Emx-POMT2	TBR1
5	JJ196	165.2515242901384	Emx-Cre+;POMT2F/F	Emx-POMT2-cKO	Emx-POMT2	TBR1
5	JJ197	192.42777289995547	Emx-Cre+;POMT2F/F	Emx-POMT2-cKO	Emx-POMT2	TBR1
5	JJ202	-88.86572068915304	Emx-Cre+;POMT2F/+	Emx-POMT2-Ctrl	Emx-POMT2	TBR1
5	JJ203	-65.66311644088667	Emx-Cre+;POMT2F/+	Emx-POMT2-Ctrl	Emx-POMT2	TBR1
5	JJ204	-45.41645308897239	Emx-Cre+;POMT2F/+	Emx-POMT2-Ctrl	Emx-POMT2	TBR1
5	JJ205	-36.32806070175442	Emx-Cre+;POMT2F/+	Emx-POMT2-Ctrl	Emx-POMT2	TBR1
5	JJ210	-2.8259668231799346	Emx-Cre+;POMT2F/+	Emx-POMT2-Ctrl	Emx-POMT2	TBR1
5	JJ211	-15.849475076153416	Emx-Cre+;POMT2F/+	Emx-POMT2-Ctrl	Emx-POMT2	TBR1
5	JJ212	-12.465627423170227	Emx-Cre+;POMT2F/+	Emx-POMT2-Ctrl	Emx-POMT2	TBR1
5	JJ213	225.21939300393433	Emx-Cre+;POMT2F/+	Emx-POMT2-Ctrl	Emx-POMT2	TBR1
5	JJ214	116.62112633040935	DGdelta/-	ICD-Mutant	ICD	TBR1
5	JJ215	56.75478672144792	DGdelta/-	ICD-Mutant	ICD	TBR1
5	JJ216	-13.004289579246915	DGdelta/-	ICD-Mutant	ICD	TBR1
5	JJ217	53.04870869899158	DGdelta/-	ICD-Mutant	ICD	TBR1
5	JJ222	-12.051790044397118	WT	ICD-Ctrl	ICD	TBR1
5	JJ223	205.32131232185202	WT	ICD-Ctrl	ICD	TBR1
5	JJ224	357.1219050244949	WT	ICD-Ctrl	ICD	TBR1
5	JJ225	208.64469612772828	WT	ICD-Ctrl	ICD	TBR1
5	JJ238	-53.94723808001769	FKRPMut	FKRP-Mutant	FKRP	TBR1
5	JJ239	12.281579850181743	FKRPMut	FKRP-Mutant	FKRP	TBR1
5	JJ240	-80.15974234069681	FKRPMut	FKRP-Mutant	FKRP	TBR1
5	JJ241	-52.357203468646844	FKRPMut	FKRP-Mutant	FKRP	TBR1
5	JJ242	-87.9465166380855	WT	FKRP-Ctrl	FKRP	TBR1
5	JJ243	19.8352439709674	WT	FKRP-Ctrl	FKRP	TBR1
5	JJ244	-110.5490670953754	WT	FKRP-Ctrl	FKRP	TBR1
5	JJ245	-141.10788832876733	WT	FKRP-Ctrl	FKRP	TBR1
5	JJ246	-200.9725693919753	WT	FKRP-Ctrl	FKRP	TBR1
5	JJ247	-101.84626547400107	WT	FKRP-Ctrl	FKRP	TBR1
5	JJ248	8.359192230114294	WT	FKRP-Ctrl	FKRP	TBR1
5	JJ249	-101.07311192928996	WT	FKRP-Ctrl	FKRP	TBR1
5	JJ250	302.0808895107438	FKRPMut	FKRP-Mutant	FKRP	TBR1
5	JJ251	75.12001750443142	FKRPMut	FKRP-Mutant	FKRP	TBR1
5	JJ252	204.24768205345558	FKRPMut	FKRP-Mutant	FKRP	TBR1
5	JJ253	329.9469532480504	FKRPMut	FKRP-Mutant	FKRP	TBR1
5	JJ254	79.3751989465812	WT	FKRP-Ctrl	FKRP	TBR1
5	JJ255	121.15658058802303	WT	FKRP-Ctrl	FKRP	TBR1
5	JJ256	173.59584966374268	WT	FKRP-Ctrl	FKRP	TBR1
5	JJ257	157.5219372420635	WT	FKRP-Ctrl	FKRP	TBR1
5	JJ310	43.375970535003454	DGdelta/-	ICD-Mutant	ICD	TBR1
5	JJ311	174.1248812232277	DGdelta/-	ICD-Mutant	ICD	TBR1
5	JJ312	30.864719805068223	DGdelta/-	ICD-Mutant	ICD	TBR1
5	JJ313	4.57562282937738	DGdelta/-	ICD-Mutant	ICD	TBR1
5	JJ318	128.40693092160606	DGdelta/-	ICD-Mutant	ICD	TBR1
5	JJ319	216.9334131168955	DGdelta/-	ICD-Mutant	ICD	TBR1
5	JJ320	253.3276564519853	DGdelta/-	ICD-Mutant	ICD	TBR1
5	JJ321	200.22998775125942	DGdelta/-	ICD-Mutant	ICD	TBR1
5	JJ326	4.648459907982821	WT	ICD-Ctrl	ICD	TBR1
5	JJ327	74.72547226704565	WT	ICD-Ctrl	ICD	TBR1
5	JJ328	266.1619316856438	WT	ICD-Ctrl	ICD	TBR1
5	JJ329	290.4268352157654	WT	ICD-Ctrl	ICD	TBR1
5	JJ334	188.50443944552546	WT	ICD-Ctrl	ICD	TBR1
5	JJ335	290.9733683139083	WT	ICD-Ctrl	ICD	TBR1
5	JJ336	91.85179645741236	WT	ICD-Ctrl	ICD	TBR1
5	JJ337	339.3817471164021	WT	ICD-Ctrl	ICD	TBR1
5	JJ338	258.87053807312253	FKRPMut	FKRP-Mutant	FKRP	TBR1
5	JJ339	102.13408016395151	FKRPMut	FKRP-Mutant	FKRP	TBR1
5	JJ340	32.79866287790306	FKRPMut	FKRP-Mutant	FKRP	TBR1
5	JJ341	211.33279080283668	FKRPMut	FKRP-Mutant	FKRP	TBR1
5	JJ342	247.47301989987957	WT	FKRP-Ctrl	FKRP	TBR1
5	JJ343	274.34210749929423	WT	FKRP-Ctrl	FKRP	TBR1
5	JJ344	243.2530389767168	WT	FKRP-Ctrl	FKRP	TBR1
5	JJ345	245.26122871826263	WT	FKRP-Ctrl	FKRP	TBR1
5	JJ358	55.98023170194002	Emx-Cre+;DGF/-	Emx-DG-cKO	Emx-DG	TBR1
5	JJ359	110.84558892653645	Emx-Cre+;DGF/-	Emx-DG-cKO	Emx-DG	TBR1
5	JJ360	35.52934298468055	Emx-Cre+;DGF/-	Emx-DG-cKO	Emx-DG	TBR1
5	JJ361	154.89412982795338	Emx-Cre+;DGF/-	Emx-DG-cKO	Emx-DG	TBR1
5	JJ366	100.50954493472516	Emx-Cre+;DGF/+	Emx-DG-Ctrl	Emx-DG	TBR1
5	JJ367	40.0546098182942	Emx-Cre+;DGF/+	Emx-DG-Ctrl	Emx-DG	TBR1
5	JJ368	147.53164633384003	Emx-Cre+;DGF/+	Emx-DG-Ctrl	Emx-DG	TBR1
5	JJ369	61.26610434508124	Emx-Cre+;DGF/+	Emx-DG-Ctrl	Emx-DG	TBR1
5	JJ374	66.15368672385023	Emx-Cre+;DGF/-	Emx-DG-cKO	Emx-DG	TBR1
5	JJ375	236.86787143019941	Emx-Cre+;DGF/-	Emx-DG-cKO	Emx-DG	TBR1
5	JJ376	239.2812714882153	Emx-Cre+;DGF/-	Emx-DG-cKO	Emx-DG	TBR1
5	JJ377	456.05621722528986	Emx-Cre+;DGF/-	Emx-DG-cKO	Emx-DG	TBR1
5	JJ382	128.73178580346473	Emx-Cre+;DGF/-	Emx-DG-cKO	Emx-DG	TBR1
5	JJ383	295.019216229602	Emx-Cre+;DGF/-	Emx-DG-cKO	Emx-DG	TBR1
5	JJ384	122.5122194763361	Emx-Cre+;DGF/-	Emx-DG-cKO	Emx-DG	TBR1
5	JJ385	144.32993030128924	Emx-Cre+;DGF/-	Emx-DG-cKO	Emx-DG	TBR1
5	JJ389	137.57676472301466	Emx-Cre+;DGF/+	Emx-DG-Ctrl	Emx-DG	TBR1
5	JJ390	347.4759912552176	Emx-Cre+;DGF/+	Emx-DG-Ctrl	Emx-DG	TBR1
5	JJ391	645.272510002498	Emx-Cre+;DGF/+	Emx-DG-Ctrl	Emx-DG	TBR1
5	JJ396	115.30239610120152	Emx-Cre+;DGF/+	Emx-DG-Ctrl	Emx-DG	TBR1
5	JJ397	226.07427072971782	Emx-Cre+;DGF/+	Emx-DG-Ctrl	Emx-DG	TBR1
5	JJ398	260.2758129354257	Emx-Cre+;DGF/+	Emx-DG-Ctrl	Emx-DG	TBR1
5	JJ399	104.66484252884429	Emx-Cre+;DGF/+	Emx-DG-Ctrl	Emx-DG	TBR1
6	JJ009	21.529917313224434	Emx-Cre+;POMT2F/+	Emx-POMT2-Ctrl	Emx-POMT2	TBR1
6	JJ010	63.1858903733679	Emx-Cre+;POMT2F/+	Emx-POMT2-Ctrl	Emx-POMT2	TBR1
6	JJ011	-16.18806528637968	Emx-Cre+;POMT2F/+	Emx-POMT2-Ctrl	Emx-POMT2	TBR1
6	JJ012	-17.638857534144165	Emx-Cre+;POMT2F/F	Emx-POMT2-cKO	Emx-POMT2	TBR1
6	JJ013	18.169837374110568	Emx-Cre+;POMT2F/F	Emx-POMT2-cKO	Emx-POMT2	TBR1
6	JJ014	-2.6850672785811107	Emx-Cre+;POMT2F/F	Emx-POMT2-cKO	Emx-POMT2	TBR1
6	JJ015	47.990817094017075	Emx-Cre+;POMT2F/+	Emx-POMT2-Ctrl	Emx-POMT2	TBR1
6	JJ016	52.49408475095788	Emx-Cre+;POMT2F/F	Emx-POMT2-cKO	Emx-POMT2	TBR1
6	JJ041	81.02211848717947	Emx-Cre+;POMT2F/F	Emx-POMT2-cKO	Emx-POMT2	TBR1
6	JJ042	108.98847821135269	Emx-Cre+;POMT2F/F	Emx-POMT2-cKO	Emx-POMT2	TBR1
6	JJ043	110.09538228047194	Emx-Cre+;POMT2F/F	Emx-POMT2-cKO	Emx-POMT2	TBR1
6	JJ044	115.17883136464984	Emx-Cre+;POMT2F/F	Emx-POMT2-cKO	Emx-POMT2	TBR1
6	JJ045	35.4384806290307	Emx-Cre+;POMT2F/+	Emx-POMT2-Ctrl	Emx-POMT2	TBR1
6	JJ046	70.11006039898992	Emx-Cre+;POMT2F/+	Emx-POMT2-Ctrl	Emx-POMT2	TBR1
6	JJ047	-59.475777057620235	Emx-Cre+;POMT2F/+	Emx-POMT2-Ctrl	Emx-POMT2	TBR1
6	JJ048	-24.35668996794027	Emx-Cre+;POMT2F/+	Emx-POMT2-Ctrl	Emx-POMT2	TBR1
6	JJ049	121.75075489903348	Emx-Cre+;POMT2F/+	Emx-POMT2-Ctrl	Emx-POMT2	TBR1
6	JJ050	30.611180967711277	Emx-Cre+;POMT2F/+	Emx-POMT2-Ctrl	Emx-POMT2	TBR1
6	JJ051	149.71051920702752	Emx-Cre+;POMT2F/+	Emx-POMT2-Ctrl	Emx-POMT2	TBR1
6	JJ052	-8.523902809653578	Emx-Cre+;POMT2F/+	Emx-POMT2-Ctrl	Emx-POMT2	TBR1
6	JJ061	50.37504464792858	WT	B4GAT1-Ctrl	B4GAT1	TBR1
6	JJ062	45.41019495454546	WT	B4GAT1-Ctrl	B4GAT1	TBR1
6	JJ063	32.26823569688293	WT	B4GAT1-Ctrl	B4GAT1	TBR1
6	JJ064	11.302549830467436	WT	B4GAT1-Ctrl	B4GAT1	TBR1
6	JJ065	25.32918216475096	B4GAT1M155T/M155T;Thy1	B4GAT1-Mutant	B4GAT1	TBR1
6	JJ066	42.14936741048317	B4GAT1M155T/M155T;Thy1	B4GAT1-Mutant	B4GAT1	TBR1
6	JJ067	-1.3805811306471203	B4GAT1M155T/M155T;Thy1	B4GAT1-Mutant	B4GAT1	TBR1
6	JJ068	-20.272531701195344	B4GAT1M155T/M155T;Thy1	B4GAT1-Mutant	B4GAT1	TBR1
6	JJ078	96.62889022510824	B4GAT1M155T/M155T	B4GAT1-Mutant	B4GAT1	TBR1
6	JJ079	62.04921476872886	B4GAT1M155T/M155T	B4GAT1-Mutant	B4GAT1	TBR1
6	JJ080	52.62861270738881	B4GAT1M155T/M155T	B4GAT1-Mutant	B4GAT1	TBR1
6	JJ081	89.33864885902152	B4GAT1M155T/M155T	B4GAT1-Mutant	B4GAT1	TBR1
6	JJ082	41.6673402872043	B4GAT1M155T/M155T;Thy1	B4GAT1-Mutant	B4GAT1	TBR1
6	JJ083	79.78550423630115	B4GAT1M155T/M155T;Thy1	B4GAT1-Mutant	B4GAT1	TBR1
6	JJ084	193.78280716545893	B4GAT1M155T/M155T;Thy1	B4GAT1-Mutant	B4GAT1	TBR1
6	JJ085	30.0620028062044	B4GAT1M155T/M155T;Thy1	B4GAT1-Mutant	B4GAT1	TBR1
6	JJ094	31.02397508559481	B4GAT1M155T/M155T	B4GAT1-Mutant	B4GAT1	TBR1
6	JJ095	23.168551330588475	B4GAT1M155T/M155T	B4GAT1-Mutant	B4GAT1	TBR1
6	JJ096	-14.204863213438708	B4GAT1M155T/M155T	B4GAT1-Mutant	B4GAT1	TBR1
6	JJ097	75.34005900470704	B4GAT1M155T/M155T	B4GAT1-Mutant	B4GAT1	TBR1
6	JJ098	114.76637931787633	B4GAT1M155T/M155T;Thy1	B4GAT1-Mutant	B4GAT1	TBR1
6	JJ099	65.64974636050088	B4GAT1M155T/M155T;Thy1	B4GAT1-Mutant	B4GAT1	TBR1
6	JJ100	47.15100258838385	B4GAT1M155T/M155T;Thy1	B4GAT1-Mutant	B4GAT1	TBR1
6	JJ101	86.96143543194036	B4GAT1M155T/M155T;Thy1	B4GAT1-Mutant	B4GAT1	TBR1
6	JJ102	183.28069338510235	WT	B4GAT1-Ctrl	B4GAT1	TBR1
6	JJ103	100.78482646242259	WT	B4GAT1-Ctrl	B4GAT1	TBR1
6	JJ104	120.88818539519741	WT	B4GAT1-Ctrl	B4GAT1	TBR1
6	JJ105	236.67188898141956	WT	B4GAT1-Ctrl	B4GAT1	TBR1
6	JJ110	109.21933764710961	WT	B4GAT1-Ctrl	B4GAT1	TBR1
6	JJ111	158.9459100679828	WT	B4GAT1-Ctrl	B4GAT1	TBR1
6	JJ112	120.82827922157662	WT	B4GAT1-Ctrl	B4GAT1	TBR1
6	JJ113	200.77601979434823	WT	B4GAT1-Ctrl	B4GAT1	TBR1
6	JJ122	72.34174723778403	Emx-Cre+;DGF/-	Emx-DG-cKO	Emx-DG	TBR1
6	JJ123	47.1909348305436	Emx-Cre+;DGF/-	Emx-DG-cKO	Emx-DG	TBR1
6	JJ124	43.74014335373564	Emx-Cre+;DGF/-	Emx-DG-cKO	Emx-DG	TBR1
6	JJ125	81.96723293340115	Emx-Cre+;DGF/-	Emx-DG-cKO	Emx-DG	TBR1
6	JJ142	143.87744708570395	Emx-Cre+;DGF/+	Emx-DG-Ctrl	Emx-DG	TBR1
6	JJ143	308.2230986728719	Emx-Cre+;DGF/+	Emx-DG-Ctrl	Emx-DG	TBR1
6	JJ144	313.4505579302742	Emx-Cre+;DGF/+	Emx-DG-Ctrl	Emx-DG	TBR1
6	JJ145	13.336318211580078	Emx-Cre+;DGF/+	Emx-DG-Ctrl	Emx-DG	TBR1
6	JJ150	67.69941650427354	Emx-Cre+;DGF/-	Emx-DG-cKO	Emx-DG	TBR1
6	JJ151	230.5501697752317	Emx-Cre+;DGF/-	Emx-DG-cKO	Emx-DG	TBR1
6	JJ152	280.9765253545652	Emx-Cre+;DGF/-	Emx-DG-cKO	Emx-DG	TBR1
6	JJ153	71.0173262612007	Emx-Cre+;DGF/-	Emx-DG-cKO	Emx-DG	TBR1
6	JJ166	25.879546465868355	Emx-Cre+;POMT2F/F	Emx-POMT2-cKO	Emx-POMT2	TBR1
6	JJ167	61.07280897009709	Emx-Cre+;POMT2F/F	Emx-POMT2-cKO	Emx-POMT2	TBR1
6	JJ168	53.62477199340145	Emx-Cre+;POMT2F/F	Emx-POMT2-cKO	Emx-POMT2	TBR1
6	JJ169	2.0327647512798044	Emx-Cre+;POMT2F/F	Emx-POMT2-cKO	Emx-POMT2	TBR1
6	JJ170	-63.69086197459077	Emx-Cre+;POMT2F/+	Emx-POMT2-Ctrl	Emx-POMT2	TBR1
6	JJ171	-59.733535830861456	Emx-Cre+;POMT2F/+	Emx-POMT2-Ctrl	Emx-POMT2	TBR1
6	JJ172	-35.89967469481284	Emx-Cre+;POMT2F/+	Emx-POMT2-Ctrl	Emx-POMT2	TBR1
6	JJ173	-67.78892510094049	Emx-Cre+;POMT2F/+	Emx-POMT2-Ctrl	Emx-POMT2	TBR1
6	JJ194	188.73126842109272	Emx-Cre+;POMT2F/F	Emx-POMT2-cKO	Emx-POMT2	TBR1
6	JJ195	238.93037002966253	Emx-Cre+;POMT2F/F	Emx-POMT2-cKO	Emx-POMT2	TBR1
6	JJ196	220.57305410339316	Emx-Cre+;POMT2F/F	Emx-POMT2-cKO	Emx-POMT2	TBR1
6	JJ197	278.1960839516489	Emx-Cre+;POMT2F/F	Emx-POMT2-cKO	Emx-POMT2	TBR1
6	JJ202	-67.12977955625844	Emx-Cre+;POMT2F/+	Emx-POMT2-Ctrl	Emx-POMT2	TBR1
6	JJ203	-22.30376340311985	Emx-Cre+;POMT2F/+	Emx-POMT2-Ctrl	Emx-POMT2	TBR1
6	JJ204	36.71645572472854	Emx-Cre+;POMT2F/+	Emx-POMT2-Ctrl	Emx-POMT2	TBR1
6	JJ205	63.410857719298214	Emx-Cre+;POMT2F/+	Emx-POMT2-Ctrl	Emx-POMT2	TBR1
6	JJ210	150.4410038807229	Emx-Cre+;POMT2F/+	Emx-POMT2-Ctrl	Emx-POMT2	TBR1
6	JJ211	-34.77293441506223	Emx-Cre+;POMT2F/+	Emx-POMT2-Ctrl	Emx-POMT2	TBR1
6	JJ212	91.80752864605377	Emx-Cre+;POMT2F/+	Emx-POMT2-Ctrl	Emx-POMT2	TBR1
6	JJ213	250.05567288929583	Emx-Cre+;POMT2F/+	Emx-POMT2-Ctrl	Emx-POMT2	TBR1
6	JJ214	6.6086580346699675	DGdelta/-	ICD-Mutant	ICD	TBR1
6	JJ215	407.4601980417447	DGdelta/-	ICD-Mutant	ICD	TBR1
6	JJ216	25.012712893871292	DGdelta/-	ICD-Mutant	ICD	TBR1
6	JJ217	-44.31831649026359	DGdelta/-	ICD-Mutant	ICD	TBR1
6	JJ222	205.67295269083692	WT	ICD-Ctrl	ICD	TBR1
6	JJ223	130.8664329945127	WT	ICD-Ctrl	ICD	TBR1
6	JJ224	57.0219467394636	WT	ICD-Ctrl	ICD	TBR1
6	JJ225	151.8326004487159	WT	ICD-Ctrl	ICD	TBR1
6	JJ238	-17.91639683459645	FKRPMut	FKRP-Mutant	FKRP	TBR1
6	JJ239	42.480858767560676	FKRPMut	FKRP-Mutant	FKRP	TBR1
6	JJ240	-64.9469689276475	FKRPMut	FKRP-Mutant	FKRP	TBR1
6	JJ241	9.325396832944875	FKRPMut	FKRP-Mutant	FKRP	TBR1
6	JJ242	-42.604151870673604	WT	FKRP-Ctrl	FKRP	TBR1
6	JJ243	-102.48402501297134	WT	FKRP-Ctrl	FKRP	TBR1
6	JJ244	-19.573513976480324	WT	FKRP-Ctrl	FKRP	TBR1
6	JJ245	-106.65226462276321	WT	FKRP-Ctrl	FKRP	TBR1
6	JJ246	-13.728135317901357	WT	FKRP-Ctrl	FKRP	TBR1
6	JJ247	-56.49404689436233	WT	FKRP-Ctrl	FKRP	TBR1
6	JJ248	-45.55412978007295	WT	FKRP-Ctrl	FKRP	TBR1
6	JJ249	-106.67589247948452	WT	FKRP-Ctrl	FKRP	TBR1
6	JJ250	260.866946775701	FKRPMut	FKRP-Mutant	FKRP	TBR1
6	JJ251	192.5733269945582	FKRPMut	FKRP-Mutant	FKRP	TBR1
6	JJ252	-11.663457725200638	FKRPMut	FKRP-Mutant	FKRP	TBR1
6	JJ253	225.00990854817815	FKRPMut	FKRP-Mutant	FKRP	TBR1
6	JJ254	93.23950104059834	WT	FKRP-Ctrl	FKRP	TBR1
6	JJ255	185.6331304292929	WT	FKRP-Ctrl	FKRP	TBR1
6	JJ256	143.45331633040936	WT	FKRP-Ctrl	FKRP	TBR1
6	JJ257	352.6466684830447	WT	FKRP-Ctrl	FKRP	TBR1
6	JJ310	128.36981504117634	DGdelta/-	ICD-Mutant	ICD	TBR1
6	JJ311	42.00243431870376	DGdelta/-	ICD-Mutant	ICD	TBR1
6	JJ312	104.76764076023387	DGdelta/-	ICD-Mutant	ICD	TBR1
6	JJ313	225.93893386022242	DGdelta/-	ICD-Mutant	ICD	TBR1
6	JJ318	155.3710314507065	DGdelta/-	ICD-Mutant	ICD	TBR1
6	JJ319	288.5070003975973	DGdelta/-	ICD-Mutant	ICD	TBR1
6	JJ320	146.123344077028	DGdelta/-	ICD-Mutant	ICD	TBR1
6	JJ321	258.18923136196975	DGdelta/-	ICD-Mutant	ICD	TBR1
6	JJ326	81.27609940210941	WT	ICD-Ctrl	ICD	TBR1
6	JJ327	112.27867268956163	WT	ICD-Ctrl	ICD	TBR1
6	JJ328	283.29123484525854	WT	ICD-Ctrl	ICD	TBR1
6	JJ329	180.79749477700796	WT	ICD-Ctrl	ICD	TBR1
6	JJ334	324.5817226623087	WT	ICD-Ctrl	ICD	TBR1
6	JJ335	377.6553062071262	WT	ICD-Ctrl	ICD	TBR1
6	JJ336	306.4114430304221	WT	ICD-Ctrl	ICD	TBR1
6	JJ337	210.46771481086174	WT	ICD-Ctrl	ICD	TBR1
6	JJ338	283.0762828099647	FKRPMut	FKRP-Mutant	FKRP	TBR1
6	JJ339	134.85921523496236	FKRPMut	FKRP-Mutant	FKRP	TBR1
6	JJ340	95.51213832221181	FKRPMut	FKRP-Mutant	FKRP	TBR1
6	JJ341	212.8752943040623	FKRPMut	FKRP-Mutant	FKRP	TBR1
6	JJ342	213.42244113812413	WT	FKRP-Ctrl	FKRP	TBR1
6	JJ343	388.0291877537016	WT	FKRP-Ctrl	FKRP	TBR1
6	JJ344	245.55733378367225	WT	FKRP-Ctrl	FKRP	TBR1
6	JJ345	342.24617965253907	WT	FKRP-Ctrl	FKRP	TBR1
6	JJ358	16.481048280423312	Emx-Cre+;DGF/-	Emx-DG-cKO	Emx-DG	TBR1
6	JJ359	90.41628688949943	Emx-Cre+;DGF/-	Emx-DG-cKO	Emx-DG	TBR1
6	JJ360	68.96701729023607	Emx-Cre+;DGF/-	Emx-DG-cKO	Emx-DG	TBR1
6	JJ361	179.54582559514915	Emx-Cre+;DGF/-	Emx-DG-cKO	Emx-DG	TBR1
6	JJ366	251.7962613770992	Emx-Cre+;DGF/+	Emx-DG-Ctrl	Emx-DG	TBR1
6	JJ367	241.94534391201668	Emx-Cre+;DGF/+	Emx-DG-Ctrl	Emx-DG	TBR1
6	JJ368	220.81988820269586	Emx-Cre+;DGF/+	Emx-DG-Ctrl	Emx-DG	TBR1
6	JJ369	164.82953824934125	Emx-Cre+;DGF/+	Emx-DG-Ctrl	Emx-DG	TBR1
6	JJ374	90.1214020704789	Emx-Cre+;DGF/-	Emx-DG-cKO	Emx-DG	TBR1
6	JJ375	334.47647456817253	Emx-Cre+;DGF/-	Emx-DG-cKO	Emx-DG	TBR1
6	JJ376	265.46133502008564	Emx-Cre+;DGF/-	Emx-DG-cKO	Emx-DG	TBR1
6	JJ377	251.4873345766748	Emx-Cre+;DGF/-	Emx-DG-cKO	Emx-DG	TBR1
6	JJ382	168.25463243542697	Emx-Cre+;DGF/-	Emx-DG-cKO	Emx-DG	TBR1
6	JJ383	316.6528791174804	Emx-Cre+;DGF/-	Emx-DG-cKO	Emx-DG	TBR1
6	JJ384	173.83476769956033	Emx-Cre+;DGF/-	Emx-DG-cKO	Emx-DG	TBR1
6	JJ385	157.25712911177376	Emx-Cre+;DGF/-	Emx-DG-cKO	Emx-DG	TBR1
6	JJ389	197.1093894069247	Emx-Cre+;DGF/+	Emx-DG-Ctrl	Emx-DG	TBR1
6	JJ390	373.08469837094543	Emx-Cre+;DGF/+	Emx-DG-Ctrl	Emx-DG	TBR1
6	JJ391	436.54327815374285	Emx-Cre+;DGF/+	Emx-DG-Ctrl	Emx-DG	TBR1
6	JJ396	172.02358578182418	Emx-Cre+;DGF/+	Emx-DG-Ctrl	Emx-DG	TBR1
6	JJ397	283.454602872575	Emx-Cre+;DGF/+	Emx-DG-Ctrl	Emx-DG	TBR1
6	JJ398	323.3190899989177	Emx-Cre+;DGF/+	Emx-DG-Ctrl	Emx-DG	TBR1
6	JJ399	169.0135339539651	Emx-Cre+;DGF/+	Emx-DG-Ctrl	Emx-DG	TBR1
7	JJ009	37.23383660755017	Emx-Cre+;POMT2F/+	Emx-POMT2-Ctrl	Emx-POMT2	TBR1
7	JJ010	43.91425903583803	Emx-Cre+;POMT2F/+	Emx-POMT2-Ctrl	Emx-POMT2	TBR1
7	JJ011	10.812947485359453	Emx-Cre+;POMT2F/+	Emx-POMT2-Ctrl	Emx-POMT2	TBR1
7	JJ012	20.780033083517043	Emx-Cre+;POMT2F/F	Emx-POMT2-cKO	Emx-POMT2	TBR1
7	JJ013	-5.490116512041595	Emx-Cre+;POMT2F/F	Emx-POMT2-cKO	Emx-POMT2	TBR1
7	JJ014	13.15710106875783	Emx-Cre+;POMT2F/F	Emx-POMT2-cKO	Emx-POMT2	TBR1
7	JJ015	115.9522146153846	Emx-Cre+;POMT2F/+	Emx-POMT2-Ctrl	Emx-POMT2	TBR1
7	JJ016	88.90081348659005	Emx-Cre+;POMT2F/F	Emx-POMT2-cKO	Emx-POMT2	TBR1
7	JJ041	157.75733746153847	Emx-Cre+;POMT2F/F	Emx-POMT2-cKO	Emx-POMT2	TBR1
7	JJ042	114.719906955314	Emx-Cre+;POMT2F/F	Emx-POMT2-cKO	Emx-POMT2	TBR1
7	JJ043	96.06575721915642	Emx-Cre+;POMT2F/F	Emx-POMT2-cKO	Emx-POMT2	TBR1
7	JJ044	85.10440210972602	Emx-Cre+;POMT2F/F	Emx-POMT2-cKO	Emx-POMT2	TBR1
7	JJ045	-27.13795173811904	Emx-Cre+;POMT2F/+	Emx-POMT2-Ctrl	Emx-POMT2	TBR1
7	JJ046	7.074840205753162	Emx-Cre+;POMT2F/+	Emx-POMT2-Ctrl	Emx-POMT2	TBR1
7	JJ047	23.398890702643712	Emx-Cre+;POMT2F/+	Emx-POMT2-Ctrl	Emx-POMT2	TBR1
7	JJ048	39.3785676868687	Emx-Cre+;POMT2F/+	Emx-POMT2-Ctrl	Emx-POMT2	TBR1
7	JJ049	64.03728259260429	Emx-Cre+;POMT2F/+	Emx-POMT2-Ctrl	Emx-POMT2	TBR1
7	JJ050	0.7997173209876488	Emx-Cre+;POMT2F/+	Emx-POMT2-Ctrl	Emx-POMT2	TBR1
7	JJ051	117.35415975783475	Emx-Cre+;POMT2F/+	Emx-POMT2-Ctrl	Emx-POMT2	TBR1
7	JJ052	22.09792731855157	Emx-Cre+;POMT2F/+	Emx-POMT2-Ctrl	Emx-POMT2	TBR1
7	JJ061	83.70066227345922	WT	B4GAT1-Ctrl	B4GAT1	TBR1
7	JJ062	73.63642879732103	WT	B4GAT1-Ctrl	B4GAT1	TBR1
7	JJ063	1.6903578886970838	WT	B4GAT1-Ctrl	B4GAT1	TBR1
7	JJ064	16.422195241398253	WT	B4GAT1-Ctrl	B4GAT1	TBR1
7	JJ065	49.37158949917898	B4GAT1M155T/M155T;Thy1	B4GAT1-Mutant	B4GAT1	TBR1
7	JJ066	74.81192508130054	B4GAT1M155T/M155T;Thy1	B4GAT1-Mutant	B4GAT1	TBR1
7	JJ067	26.038794542938536	B4GAT1M155T/M155T;Thy1	B4GAT1-Mutant	B4GAT1	TBR1
7	JJ068	38.97382842226144	B4GAT1M155T/M155T;Thy1	B4GAT1-Mutant	B4GAT1	TBR1
7	JJ078	83.10825530447329	B4GAT1M155T/M155T	B4GAT1-Mutant	B4GAT1	TBR1
7	JJ079	60.71448537449453	B4GAT1M155T/M155T	B4GAT1-Mutant	B4GAT1	TBR1
7	JJ080	117.42593043871547	B4GAT1M155T/M155T	B4GAT1-Mutant	B4GAT1	TBR1
7	JJ081	60.9953649862357	B4GAT1M155T/M155T	B4GAT1-Mutant	B4GAT1	TBR1
7	JJ082	43.85561012847413	B4GAT1M155T/M155T;Thy1	B4GAT1-Mutant	B4GAT1	TBR1
7	JJ083	132.17593314525936	B4GAT1M155T/M155T;Thy1	B4GAT1-Mutant	B4GAT1	TBR1
7	JJ084	154.23099735869565	B4GAT1M155T/M155T;Thy1	B4GAT1-Mutant	B4GAT1	TBR1
7	JJ085	56.88445967185762	B4GAT1M155T/M155T;Thy1	B4GAT1-Mutant	B4GAT1	TBR1
7	JJ094	94.9966413756329	B4GAT1M155T/M155T	B4GAT1-Mutant	B4GAT1	TBR1
7	JJ095	30.863030147013603	B4GAT1M155T/M155T	B4GAT1-Mutant	B4GAT1	TBR1
7	JJ096	21.57229024286342	B4GAT1M155T/M155T	B4GAT1-Mutant	B4GAT1	TBR1
7	JJ097	80.44204190697387	B4GAT1M155T/M155T	B4GAT1-Mutant	B4GAT1	TBR1
7	JJ098	156.34394887432794	B4GAT1M155T/M155T;Thy1	B4GAT1-Mutant	B4GAT1	TBR1
7	JJ099	65.07709457147604	B4GAT1M155T/M155T;Thy1	B4GAT1-Mutant	B4GAT1	TBR1
7	JJ100	79.53573333333334	B4GAT1M155T/M155T;Thy1	B4GAT1-Mutant	B4GAT1	TBR1
7	JJ101	106.42402350012219	B4GAT1M155T/M155T;Thy1	B4GAT1-Mutant	B4GAT1	TBR1
7	JJ102	198.67649855057158	WT	B4GAT1-Ctrl	B4GAT1	TBR1
7	JJ103	166.08395638305754	WT	B4GAT1-Ctrl	B4GAT1	TBR1
7	JJ104	125.68554345312714	WT	B4GAT1-Ctrl	B4GAT1	TBR1
7	JJ105	248.75760706949092	WT	B4GAT1-Ctrl	B4GAT1	TBR1
7	JJ110	114.60644327503637	WT	B4GAT1-Ctrl	B4GAT1	TBR1
7	JJ111	103.19604689686271	WT	B4GAT1-Ctrl	B4GAT1	TBR1
7	JJ112	157.15163631227225	WT	B4GAT1-Ctrl	B4GAT1	TBR1
7	JJ113	176.51605043023994	WT	B4GAT1-Ctrl	B4GAT1	TBR1
7	JJ122	65.1797606053533	Emx-Cre+;DGF/-	Emx-DG-cKO	Emx-DG	TBR1
7	JJ123	57.83765388403731	Emx-Cre+;DGF/-	Emx-DG-cKO	Emx-DG	TBR1
7	JJ124	25.91649499397704	Emx-Cre+;DGF/-	Emx-DG-cKO	Emx-DG	TBR1
7	JJ125	67.64816253758597	Emx-Cre+;DGF/-	Emx-DG-cKO	Emx-DG	TBR1
7	JJ142	274.2755205761919	Emx-Cre+;DGF/+	Emx-DG-Ctrl	Emx-DG	TBR1
7	JJ143	245.5831511058221	Emx-Cre+;DGF/+	Emx-DG-Ctrl	Emx-DG	TBR1
7	JJ144	392.2318157299458	Emx-Cre+;DGF/+	Emx-DG-Ctrl	Emx-DG	TBR1
7	JJ145	20.29815140061328	Emx-Cre+;DGF/+	Emx-DG-Ctrl	Emx-DG	TBR1
7	JJ150	47.778662696106416	Emx-Cre+;DGF/-	Emx-DG-cKO	Emx-DG	TBR1
7	JJ151	154.97568245135338	Emx-Cre+;DGF/-	Emx-DG-cKO	Emx-DG	TBR1
7	JJ152	233.5046371969204	Emx-Cre+;DGF/-	Emx-DG-cKO	Emx-DG	TBR1
7	JJ153	114.70787142249101	Emx-Cre+;DGF/-	Emx-DG-cKO	Emx-DG	TBR1
7	JJ166	-5.5007026054903845	Emx-Cre+;POMT2F/F	Emx-POMT2-cKO	Emx-POMT2	TBR1
7	JJ167	66.40770854998033	Emx-Cre+;POMT2F/F	Emx-POMT2-cKO	Emx-POMT2	TBR1
7	JJ168	70.05533317445112	Emx-Cre+;POMT2F/F	Emx-POMT2-cKO	Emx-POMT2	TBR1
7	JJ169	7.922323819504811	Emx-Cre+;POMT2F/F	Emx-POMT2-cKO	Emx-POMT2	TBR1
7	JJ170	-39.108606595733136	Emx-Cre+;POMT2F/+	Emx-POMT2-Ctrl	Emx-POMT2	TBR1
7	JJ171	-148.17997234597078	Emx-Cre+;POMT2F/+	Emx-POMT2-Ctrl	Emx-POMT2	TBR1
7	JJ172	-41.79932067035069	Emx-Cre+;POMT2F/+	Emx-POMT2-Ctrl	Emx-POMT2	TBR1
7	JJ173	-66.81736440798943	Emx-Cre+;POMT2F/+	Emx-POMT2-Ctrl	Emx-POMT2	TBR1
7	JJ194	242.33939913365793	Emx-Cre+;POMT2F/F	Emx-POMT2-cKO	Emx-POMT2	TBR1
7	JJ195	177.72380909776288	Emx-Cre+;POMT2F/F	Emx-POMT2-cKO	Emx-POMT2	TBR1
7	JJ196	309.9868575836592	Emx-Cre+;POMT2F/F	Emx-POMT2-cKO	Emx-POMT2	TBR1
7	JJ197	288.32648238450685	Emx-Cre+;POMT2F/F	Emx-POMT2-cKO	Emx-POMT2	TBR1
7	JJ202	-32.03290383014303	Emx-Cre+;POMT2F/+	Emx-POMT2-Ctrl	Emx-POMT2	TBR1
7	JJ203	47.75277354269298	Emx-Cre+;POMT2F/+	Emx-POMT2-Ctrl	Emx-POMT2	TBR1
7	JJ204	155.01751620927323	Emx-Cre+;POMT2F/+	Emx-POMT2-Ctrl	Emx-POMT2	TBR1
7	JJ205	61.96094807017541	Emx-Cre+;POMT2F/+	Emx-POMT2-Ctrl	Emx-POMT2	TBR1
7	JJ210	79.5247233401016	Emx-Cre+;POMT2F/+	Emx-POMT2-Ctrl	Emx-POMT2	TBR1
7	JJ211	84.63246990133025	Emx-Cre+;POMT2F/+	Emx-POMT2-Ctrl	Emx-POMT2	TBR1
7	JJ212	163.43698337929894	Emx-Cre+;POMT2F/+	Emx-POMT2-Ctrl	Emx-POMT2	TBR1
7	JJ213	254.54567362121827	Emx-Cre+;POMT2F/+	Emx-POMT2-Ctrl	Emx-POMT2	TBR1
7	JJ214	291.55297194444444	DGdelta/-	ICD-Mutant	ICD	TBR1
7	JJ215	284.5859249296166	DGdelta/-	ICD-Mutant	ICD	TBR1
7	JJ216	194.0321928785103	DGdelta/-	ICD-Mutant	ICD	TBR1
7	JJ217	295.66970557933354	DGdelta/-	ICD-Mutant	ICD	TBR1
7	JJ222	118.76029328893621	WT	ICD-Ctrl	ICD	TBR1
7	JJ223	330.82793612558453	WT	ICD-Ctrl	ICD	TBR1
7	JJ224	109.21683874833805	WT	ICD-Ctrl	ICD	TBR1
7	JJ225	269.05425565153786	WT	ICD-Ctrl	ICD	TBR1
7	JJ238	51.203459539029915	FKRPMut	FKRP-Mutant	FKRP	TBR1
7	JJ239	67.76883838245408	FKRPMut	FKRP-Mutant	FKRP	TBR1
7	JJ240	-59.44396881303245	FKRPMut	FKRP-Mutant	FKRP	TBR1
7	JJ241	-29.18680417578173	FKRPMut	FKRP-Mutant	FKRP	TBR1
7	JJ242	-0.10751419822796986	WT	FKRP-Ctrl	FKRP	TBR1
7	JJ243	113.98386035468036	WT	FKRP-Ctrl	FKRP	TBR1
7	JJ244	41.76263841187097	WT	FKRP-Ctrl	FKRP	TBR1
7	JJ245	-30.67721303546159	WT	FKRP-Ctrl	FKRP	TBR1
7	JJ246	34.794298447530764	WT	FKRP-Ctrl	FKRP	TBR1
7	JJ247	-90.25515237876304	WT	FKRP-Ctrl	FKRP	TBR1
7	JJ248	-105.16938008562504	WT	FKRP-Ctrl	FKRP	TBR1
7	JJ249	-60.42402736674978	WT	FKRP-Ctrl	FKRP	TBR1
7	JJ250	224.15334592100012	FKRPMut	FKRP-Mutant	FKRP	TBR1
7	JJ251	214.85201501401002	FKRPMut	FKRP-Mutant	FKRP	TBR1
7	JJ252	253.8156105800812	FKRPMut	FKRP-Mutant	FKRP	TBR1
7	JJ253	170.5238918389401	FKRPMut	FKRP-Mutant	FKRP	TBR1
7	JJ254	176.89439634563814	WT	FKRP-Ctrl	FKRP	TBR1
7	JJ255	156.15928754329002	WT	FKRP-Ctrl	FKRP	TBR1
7	JJ256	189.44021194444448	WT	FKRP-Ctrl	FKRP	TBR1
7	JJ257	195.72908983946613	WT	FKRP-Ctrl	FKRP	TBR1
7	JJ310	83.95029155589616	DGdelta/-	ICD-Mutant	ICD	TBR1
7	JJ311	41.857008638686615	DGdelta/-	ICD-Mutant	ICD	TBR1
7	JJ312	230.9412834502923	DGdelta/-	ICD-Mutant	ICD	TBR1
7	JJ313	198.68989596319236	DGdelta/-	ICD-Mutant	ICD	TBR1
7	JJ318	465.5504626869167	DGdelta/-	ICD-Mutant	ICD	TBR1
7	JJ319	323.6749003975973	DGdelta/-	ICD-Mutant	ICD	TBR1
7	JJ320	272.90091501849935	DGdelta/-	ICD-Mutant	ICD	TBR1
7	JJ321	300.82323089700253	DGdelta/-	ICD-Mutant	ICD	TBR1
7	JJ326	141.71737130645025	WT	ICD-Ctrl	ICD	TBR1
7	JJ327	81.34814227295173	WT	ICD-Ctrl	ICD	TBR1
7	JJ328	310.55529074481143	WT	ICD-Ctrl	ICD	TBR1
7	JJ329	195.95700755226804	WT	ICD-Ctrl	ICD	TBR1
7	JJ334	386.4093007508868	WT	ICD-Ctrl	ICD	TBR1
7	JJ335	267.9269187900988	WT	ICD-Ctrl	ICD	TBR1
7	JJ336	192.8023985859776	WT	ICD-Ctrl	ICD	TBR1
7	JJ337	189.38979852733686	WT	ICD-Ctrl	ICD	TBR1
7	JJ338	402.3234717254351	FKRPMut	FKRP-Mutant	FKRP	TBR1
7	JJ339	182.22403528508775	FKRPMut	FKRP-Mutant	FKRP	TBR1
7	JJ340	79.32986517252209	FKRPMut	FKRP-Mutant	FKRP	TBR1
7	JJ341	186.17729654996313	FKRPMut	FKRP-Mutant	FKRP	TBR1
7	JJ342	302.031683057316	WT	FKRP-Ctrl	FKRP	TBR1
7	JJ343	386.31703231891896	WT	FKRP-Ctrl	FKRP	TBR1
7	JJ344	327.9313955785441	WT	FKRP-Ctrl	FKRP	TBR1
7	JJ345	373.8265148632671	WT	FKRP-Ctrl	FKRP	TBR1
7	JJ358	165.0270531305115	Emx-Cre+;DGF/-	Emx-DG-cKO	Emx-DG	TBR1
7	JJ359	9.47590004171756	Emx-Cre+;DGF/-	Emx-DG-cKO	Emx-DG	TBR1
7	JJ360	161.98434367912498	Emx-Cre+;DGF/-	Emx-DG-cKO	Emx-DG	TBR1
7	JJ361	287.44556947742433	Emx-Cre+;DGF/-	Emx-DG-cKO	Emx-DG	TBR1
7	JJ366	161.11430651359174	Emx-Cre+;DGF/+	Emx-DG-Ctrl	Emx-DG	TBR1
7	JJ367	154.09678173252942	Emx-Cre+;DGF/+	Emx-DG-Ctrl	Emx-DG	TBR1
7	JJ368	92.76919036951453	Emx-Cre+;DGF/+	Emx-DG-Ctrl	Emx-DG	TBR1
7	JJ369	139.56608974253405	Emx-Cre+;DGF/+	Emx-DG-Ctrl	Emx-DG	TBR1
7	JJ374	21.813124045787543	Emx-Cre+;DGF/-	Emx-DG-cKO	Emx-DG	TBR1
7	JJ375	171.6614546210826	Emx-Cre+;DGF/-	Emx-DG-cKO	Emx-DG	TBR1
7	JJ376	333.0554037069544	Emx-Cre+;DGF/-	Emx-DG-cKO	Emx-DG	TBR1
7	JJ377	260.7605034997996	Emx-Cre+;DGF/-	Emx-DG-cKO	Emx-DG	TBR1
7	JJ382	128.39066897465437	Emx-Cre+;DGF/-	Emx-DG-cKO	Emx-DG	TBR1
7	JJ383	184.7183945850397	Emx-Cre+;DGF/-	Emx-DG-cKO	Emx-DG	TBR1
7	JJ384	125.03897139645903	Emx-Cre+;DGF/-	Emx-DG-cKO	Emx-DG	TBR1
7	JJ385	212.02014990913236	Emx-Cre+;DGF/-	Emx-DG-cKO	Emx-DG	TBR1
7	JJ389	200.1100549040007	Emx-Cre+;DGF/+	Emx-DG-Ctrl	Emx-DG	TBR1
7	JJ390	215.52923858988368	Emx-Cre+;DGF/+	Emx-DG-Ctrl	Emx-DG	TBR1
7	JJ391	353.2680911173251	Emx-Cre+;DGF/+	Emx-DG-Ctrl	Emx-DG	TBR1
7	JJ396	237.4432041393121	Emx-Cre+;DGF/+	Emx-DG-Ctrl	Emx-DG	TBR1
7	JJ397	307.21257247574954	Emx-Cre+;DGF/+	Emx-DG-Ctrl	Emx-DG	TBR1
7	JJ398	272.21779507828285	Emx-Cre+;DGF/+	Emx-DG-Ctrl	Emx-DG	TBR1
7	JJ399	223.0185299229719	Emx-Cre+;DGF/+	Emx-DG-Ctrl	Emx-DG	TBR1
8	JJ009	-0.4224298729227485	Emx-Cre+;POMT2F/+	Emx-POMT2-Ctrl	Emx-POMT2	TBR1
8	JJ010	74.81460681125101	Emx-Cre+;POMT2F/+	Emx-POMT2-Ctrl	Emx-POMT2	TBR1
8	JJ011	5.872201818363408	Emx-Cre+;POMT2F/+	Emx-POMT2-Ctrl	Emx-POMT2	TBR1
8	JJ012	8.703617178001158	Emx-Cre+;POMT2F/F	Emx-POMT2-cKO	Emx-POMT2	TBR1
8	JJ013	26.21890615717935	Emx-Cre+;POMT2F/F	Emx-POMT2-cKO	Emx-POMT2	TBR1
8	JJ014	72.39457557856177	Emx-Cre+;POMT2F/F	Emx-POMT2-cKO	Emx-POMT2	TBR1
8	JJ015	106.97170606837608	Emx-Cre+;POMT2F/+	Emx-POMT2-Ctrl	Emx-POMT2	TBR1
8	JJ016	61.90755295019155	Emx-Cre+;POMT2F/F	Emx-POMT2-cKO	Emx-POMT2	TBR1
8	JJ041	122.96873079487177	Emx-Cre+;POMT2F/F	Emx-POMT2-cKO	Emx-POMT2	TBR1
8	JJ042	65.20428255917875	Emx-Cre+;POMT2F/F	Emx-POMT2-cKO	Emx-POMT2	TBR1
8	JJ043	127.88122042985879	Emx-Cre+;POMT2F/F	Emx-POMT2-cKO	Emx-POMT2	TBR1
8	JJ044	60.70061541333064	Emx-Cre+;POMT2F/F	Emx-POMT2-cKO	Emx-POMT2	TBR1
8	JJ045	-19.282595178303705	Emx-Cre+;POMT2F/+	Emx-POMT2-Ctrl	Emx-POMT2	TBR1
8	JJ046	41.90066339415895	Emx-Cre+;POMT2F/+	Emx-POMT2-Ctrl	Emx-POMT2	TBR1
8	JJ047	68.52422211524993	Emx-Cre+;POMT2F/+	Emx-POMT2-Ctrl	Emx-POMT2	TBR1
8	JJ048	-13.723106017566977	Emx-Cre+;POMT2F/+	Emx-POMT2-Ctrl	Emx-POMT2	TBR1
8	JJ049	102.0700770223125	Emx-Cre+;POMT2F/+	Emx-POMT2-Ctrl	Emx-POMT2	TBR1
8	JJ050	97.59111065432099	Emx-Cre+;POMT2F/+	Emx-POMT2-Ctrl	Emx-POMT2	TBR1
8	JJ051	153.09612699430198	Emx-Cre+;POMT2F/+	Emx-POMT2-Ctrl	Emx-POMT2	TBR1
8	JJ052	102.66657911342338	Emx-Cre+;POMT2F/+	Emx-POMT2-Ctrl	Emx-POMT2	TBR1
8	JJ061	91.49619380861756	WT	B4GAT1-Ctrl	B4GAT1	TBR1
8	JJ062	91.90925717676768	WT	B4GAT1-Ctrl	B4GAT1	TBR1
8	JJ063	47.387219778254966	WT	B4GAT1-Ctrl	B4GAT1	TBR1
8	JJ064	38.17911609996538	WT	B4GAT1-Ctrl	B4GAT1	TBR1
8	JJ065	77.18357526819923	B4GAT1M155T/M155T;Thy1	B4GAT1-Mutant	B4GAT1	TBR1
8	JJ066	56.5522661493082	B4GAT1M155T/M155T;Thy1	B4GAT1-Mutant	B4GAT1	TBR1
8	JJ067	3.7369953854293763	B4GAT1M155T/M155T;Thy1	B4GAT1-Mutant	B4GAT1	TBR1
8	JJ068	46.20303262144392	B4GAT1M155T/M155T;Thy1	B4GAT1-Mutant	B4GAT1	TBR1
8	JJ078	118.02468784415584	B4GAT1M155T/M155T	B4GAT1-Mutant	B4GAT1	TBR1
8	JJ079	75.81899463067047	B4GAT1M155T/M155T	B4GAT1-Mutant	B4GAT1	TBR1
8	JJ080	119.22637548145052	B4GAT1M155T/M155T	B4GAT1-Mutant	B4GAT1	TBR1
8	JJ081	187.19762786063185	B4GAT1M155T/M155T	B4GAT1-Mutant	B4GAT1	TBR1
8	JJ082	52.98631012847412	B4GAT1M155T/M155T;Thy1	B4GAT1-Mutant	B4GAT1	TBR1
8	JJ083	166.8310929974761	B4GAT1M155T/M155T;Thy1	B4GAT1-Mutant	B4GAT1	TBR1
8	JJ084	189.0720421896135	B4GAT1M155T/M155T;Thy1	B4GAT1-Mutant	B4GAT1	TBR1
8	JJ085	30.16150119948088	B4GAT1M155T/M155T;Thy1	B4GAT1-Mutant	B4GAT1	TBR1
8	JJ094	94.78970433290664	B4GAT1M155T/M155T	B4GAT1-Mutant	B4GAT1	TBR1
8	JJ095	80.4816492774484	B4GAT1M155T/M155T	B4GAT1-Mutant	B4GAT1	TBR1
8	JJ096	97.83328603557312	B4GAT1M155T/M155T	B4GAT1-Mutant	B4GAT1	TBR1
8	JJ097	122.83610373157437	B4GAT1M155T/M155T	B4GAT1-Mutant	B4GAT1	TBR1
8	JJ098	171.4260389280914	B4GAT1M155T/M155T;Thy1	B4GAT1-Mutant	B4GAT1	TBR1
8	JJ099	60.9676606518431	B4GAT1M155T/M155T;Thy1	B4GAT1-Mutant	B4GAT1	TBR1
8	JJ100	106.4213466540404	B4GAT1M155T/M155T;Thy1	B4GAT1-Mutant	B4GAT1	TBR1
8	JJ101	145.84002080176768	B4GAT1M155T/M155T;Thy1	B4GAT1-Mutant	B4GAT1	TBR1
8	JJ102	108.27749524845639	WT	B4GAT1-Ctrl	B4GAT1	TBR1
8	JJ103	184.11780113275225	WT	B4GAT1-Ctrl	B4GAT1	TBR1
8	JJ104	156.47120881400082	WT	B4GAT1-Ctrl	B4GAT1	TBR1
8	JJ105	342.68825371571904	WT	B4GAT1-Ctrl	B4GAT1	TBR1
8	JJ110	138.9163998352748	WT	B4GAT1-Ctrl	B4GAT1	TBR1
8	JJ111	106.60209085367215	WT	B4GAT1-Ctrl	B4GAT1	TBR1
8	JJ112	88.0137769016743	WT	B4GAT1-Ctrl	B4GAT1	TBR1
8	JJ113	74.21169199626566	WT	B4GAT1-Ctrl	B4GAT1	TBR1
8	JJ122	116.8530618036104	Emx-Cre+;DGF/-	Emx-DG-cKO	Emx-DG	TBR1
8	JJ123	63.980521886290035	Emx-Cre+;DGF/-	Emx-DG-cKO	Emx-DG	TBR1
8	JJ124	91.6845780161492	Emx-Cre+;DGF/-	Emx-DG-cKO	Emx-DG	TBR1
8	JJ125	94.00459937484258	Emx-Cre+;DGF/-	Emx-DG-cKO	Emx-DG	TBR1
8	JJ142	202.25621754653352	Emx-Cre+;DGF/+	Emx-DG-Ctrl	Emx-DG	TBR1
8	JJ143	324.5068561341413	Emx-Cre+;DGF/+	Emx-DG-Ctrl	Emx-DG	TBR1
8	JJ144	228.9612743141458	Emx-Cre+;DGF/+	Emx-DG-Ctrl	Emx-DG	TBR1
8	JJ145	99.62561518127704	Emx-Cre+;DGF/+	Emx-DG-Ctrl	Emx-DG	TBR1
8	JJ150	92.91341033143404	Emx-Cre+;DGF/-	Emx-DG-cKO	Emx-DG	TBR1
8	JJ151	202.13646990864717	Emx-Cre+;DGF/-	Emx-DG-cKO	Emx-DG	TBR1
8	JJ152	165.89604835551486	Emx-Cre+;DGF/-	Emx-DG-cKO	Emx-DG	TBR1
8	JJ153	187.2059690255376	Emx-Cre+;DGF/-	Emx-DG-cKO	Emx-DG	TBR1
8	JJ166	0.4769364300260577	Emx-Cre+;POMT2F/F	Emx-POMT2-cKO	Emx-POMT2	TBR1
8	JJ167	47.38854634383447	Emx-Cre+;POMT2F/F	Emx-POMT2-cKO	Emx-POMT2	TBR1
8	JJ168	76.29286914720552	Emx-Cre+;POMT2F/F	Emx-POMT2-cKO	Emx-POMT2	TBR1
8	JJ169	25.260161716732664	Emx-Cre+;POMT2F/F	Emx-POMT2-cKO	Emx-POMT2	TBR1
8	JJ170	-70.8538270200778	Emx-Cre+;POMT2F/+	Emx-POMT2-Ctrl	Emx-POMT2	TBR1
8	JJ171	-50.59794374629215	Emx-Cre+;POMT2F/+	Emx-POMT2-Ctrl	Emx-POMT2	TBR1
8	JJ172	-22.546565291629786	Emx-Cre+;POMT2F/+	Emx-POMT2-Ctrl	Emx-POMT2	TBR1
8	JJ173	-37.98846819440613	Emx-Cre+;POMT2F/+	Emx-POMT2-Ctrl	Emx-POMT2	TBR1
8	JJ194	177.92941025115806	Emx-Cre+;POMT2F/F	Emx-POMT2-cKO	Emx-POMT2	TBR1
8	JJ195	366.0269506253863	Emx-Cre+;POMT2F/F	Emx-POMT2-cKO	Emx-POMT2	TBR1
8	JJ196	220.1581708504974	Emx-Cre+;POMT2F/F	Emx-POMT2-cKO	Emx-POMT2	TBR1
8	JJ197	173.22895590649136	Emx-Cre+;POMT2F/F	Emx-POMT2-cKO	Emx-POMT2	TBR1
8	JJ202	-65.31564387463692	Emx-Cre+;POMT2F/+	Emx-POMT2-Ctrl	Emx-POMT2	TBR1
8	JJ203	91.3984086001642	Emx-Cre+;POMT2F/+	Emx-POMT2-Ctrl	Emx-POMT2	TBR1
8	JJ204	53.03036048663326	Emx-Cre+;POMT2F/+	Emx-POMT2-Ctrl	Emx-POMT2	TBR1
8	JJ205	114.09193578947362	Emx-Cre+;POMT2F/+	Emx-POMT2-Ctrl	Emx-POMT2	TBR1
8	JJ210	160.24526764515937	Emx-Cre+;POMT2F/+	Emx-POMT2-Ctrl	Emx-POMT2	TBR1
8	JJ211	162.07985561281512	Emx-Cre+;POMT2F/+	Emx-POMT2-Ctrl	Emx-POMT2	TBR1
8	JJ212	208.97358757462518	Emx-Cre+;POMT2F/+	Emx-POMT2-Ctrl	Emx-POMT2	TBR1
8	JJ213	159.30941614326412	Emx-Cre+;POMT2F/+	Emx-POMT2-Ctrl	Emx-POMT2	TBR1
8	JJ214	181.75342073308275	DGdelta/-	ICD-Mutant	ICD	TBR1
8	JJ215	251.469332709937	DGdelta/-	ICD-Mutant	ICD	TBR1
8	JJ216	157.61237389430457	DGdelta/-	ICD-Mutant	ICD	TBR1
8	JJ217	350.62293885772175	DGdelta/-	ICD-Mutant	ICD	TBR1
8	JJ222	406.82598167277456	WT	ICD-Ctrl	ICD	TBR1
8	JJ223	170.18102101383633	WT	ICD-Ctrl	ICD	TBR1
8	JJ224	197.78262606045124	WT	ICD-Ctrl	ICD	TBR1
8	JJ225	236.086077501856	WT	ICD-Ctrl	ICD	TBR1
8	JJ238	-0.3470410849437637	FKRPMut	FKRP-Mutant	FKRP	TBR1
8	JJ239	88.2825641806661	FKRPMut	FKRP-Mutant	FKRP	TBR1
8	JJ240	80.3366156877371	FKRPMut	FKRP-Mutant	FKRP	TBR1
8	JJ241	11.385153264253026	FKRPMut	FKRP-Mutant	FKRP	TBR1
8	JJ242	62.47652262270742	WT	FKRP-Ctrl	FKRP	TBR1
8	JJ243	56.049717411271104	WT	FKRP-Ctrl	FKRP	TBR1
8	JJ244	71.96681423668583	WT	FKRP-Ctrl	FKRP	TBR1
8	JJ245	39.958318710570175	WT	FKRP-Ctrl	FKRP	TBR1
8	JJ246	95.44539863271598	WT	FKRP-Ctrl	FKRP	TBR1
8	JJ247	-99.50417761685826	WT	FKRP-Ctrl	FKRP	TBR1
8	JJ248	-104.3753597943034	WT	FKRP-Ctrl	FKRP	TBR1
8	JJ249	-33.343158152282435	WT	FKRP-Ctrl	FKRP	TBR1
8	JJ250	279.3739808782652	FKRPMut	FKRP-Mutant	FKRP	TBR1
8	JJ251	226.29839774547386	FKRPMut	FKRP-Mutant	FKRP	TBR1
8	JJ252	281.0014294874431	FKRPMut	FKRP-Mutant	FKRP	TBR1
8	JJ253	307.6010828449328	FKRPMut	FKRP-Mutant	FKRP	TBR1
8	JJ254	272.747295741453	WT	FKRP-Ctrl	FKRP	TBR1
8	JJ255	173.00039608585848	WT	FKRP-Ctrl	FKRP	TBR1
8	JJ256	256.16403367933725	WT	FKRP-Ctrl	FKRP	TBR1
8	JJ257	343.1618301497114	WT	FKRP-Ctrl	FKRP	TBR1
8	JJ310	83.78304008143398	DGdelta/-	ICD-Mutant	ICD	TBR1
8	JJ311	123.94425543195662	DGdelta/-	ICD-Mutant	ICD	TBR1
8	JJ312	438.49045216374265	DGdelta/-	ICD-Mutant	ICD	TBR1
8	JJ313	218.0073902872377	DGdelta/-	ICD-Mutant	ICD	TBR1
8	JJ318	423.2336946257381	DGdelta/-	ICD-Mutant	ICD	TBR1
8	JJ319	463.6806057116069	DGdelta/-	ICD-Mutant	ICD	TBR1
8	JJ320	272.94062490462767	DGdelta/-	ICD-Mutant	ICD	TBR1
8	JJ321	325.1818105426655	DGdelta/-	ICD-Mutant	ICD	TBR1
8	JJ326	134.31246020797025	WT	ICD-Ctrl	ICD	TBR1
8	JJ327	164.37298672410282	WT	ICD-Ctrl	ICD	TBR1
8	JJ328	292.6034346371402	WT	ICD-Ctrl	ICD	TBR1
8	JJ329	219.52138759444514	WT	ICD-Ctrl	ICD	TBR1
8	JJ334	403.83947790301	WT	ICD-Ctrl	ICD	TBR1
8	JJ335	162.76280885114886	WT	ICD-Ctrl	ICD	TBR1
8	JJ336	124.41854567966728	WT	ICD-Ctrl	ICD	TBR1
8	JJ337	358.7322950577754	WT	ICD-Ctrl	ICD	TBR1
8	JJ338	284.5494188546217	FKRPMut	FKRP-Mutant	FKRP	TBR1
8	JJ339	230.02073386487052	FKRPMut	FKRP-Mutant	FKRP	TBR1
8	JJ340	141.61953153460868	FKRPMut	FKRP-Mutant	FKRP	TBR1
8	JJ341	274.2178957533376	FKRPMut	FKRP-Mutant	FKRP	TBR1
8	JJ342	403.05679533034623	WT	FKRP-Ctrl	FKRP	TBR1
8	JJ343	344.60665438743024	WT	FKRP-Ctrl	FKRP	TBR1
8	JJ344	366.5257137836722	WT	FKRP-Ctrl	FKRP	TBR1
8	JJ345	329.2860858019644	WT	FKRP-Ctrl	FKRP	TBR1
8	JJ358	102.94066203703706	Emx-Cre+;DGF/-	Emx-DG-cKO	Emx-DG	TBR1
8	JJ359	33.76129349443772	Emx-Cre+;DGF/-	Emx-DG-cKO	Emx-DG	TBR1
8	JJ360	203.7562676870615	Emx-Cre+;DGF/-	Emx-DG-cKO	Emx-DG	TBR1
8	JJ361	149.39517254002035	Emx-Cre+;DGF/-	Emx-DG-cKO	Emx-DG	TBR1
8	JJ366	207.4886122225098	Emx-Cre+;DGF/+	Emx-DG-Ctrl	Emx-DG	TBR1
8	JJ367	88.93662402302948	Emx-Cre+;DGF/+	Emx-DG-Ctrl	Emx-DG	TBR1
8	JJ368	313.50602654058986	Emx-Cre+;DGF/+	Emx-DG-Ctrl	Emx-DG	TBR1
8	JJ369	200.44059797705313	Emx-Cre+;DGF/+	Emx-DG-Ctrl	Emx-DG	TBR1
8	JJ374	123.25772841968524	Emx-Cre+;DGF/-	Emx-DG-cKO	Emx-DG	TBR1
8	JJ375	315.97391343264144	Emx-Cre+;DGF/-	Emx-DG-cKO	Emx-DG	TBR1
8	JJ376	439.5814311406845	Emx-Cre+;DGF/-	Emx-DG-cKO	Emx-DG	TBR1
8	JJ377	336.556970161279	Emx-Cre+;DGF/-	Emx-DG-cKO	Emx-DG	TBR1
8	JJ382	269.52468689011204	Emx-Cre+;DGF/-	Emx-DG-cKO	Emx-DG	TBR1
8	JJ383	238.47960849612647	Emx-Cre+;DGF/-	Emx-DG-cKO	Emx-DG	TBR1
8	JJ384	171.41520387699293	Emx-Cre+;DGF/-	Emx-DG-cKO	Emx-DG	TBR1
8	JJ385	189.5811116996476	Emx-Cre+;DGF/-	Emx-DG-cKO	Emx-DG	TBR1
8	JJ389	296.8007833620034	Emx-Cre+;DGF/+	Emx-DG-Ctrl	Emx-DG	TBR1
8	JJ390	191.7796171149068	Emx-Cre+;DGF/+	Emx-DG-Ctrl	Emx-DG	TBR1
8	JJ391	489.7166576595029	Emx-Cre+;DGF/+	Emx-DG-Ctrl	Emx-DG	TBR1
8	JJ396	200.1127973357695	Emx-Cre+;DGF/+	Emx-DG-Ctrl	Emx-DG	TBR1
8	JJ397	215.8586088249559	Emx-Cre+;DGF/+	Emx-DG-Ctrl	Emx-DG	TBR1
8	JJ398	385.7742105544733	Emx-Cre+;DGF/+	Emx-DG-Ctrl	Emx-DG	TBR1
8	JJ399	197.47737233780347	Emx-Cre+;DGF/+	Emx-DG-Ctrl	Emx-DG	TBR1
9	JJ009	40.37036767397478	Emx-Cre+;POMT2F/+	Emx-POMT2-Ctrl	Emx-POMT2	TBR1
9	JJ010	89.11312069591706	Emx-Cre+;POMT2F/+	Emx-POMT2-Ctrl	Emx-POMT2	TBR1
9	JJ011	45.333650257098576	Emx-Cre+;POMT2F/+	Emx-POMT2-Ctrl	Emx-POMT2	TBR1
9	JJ012	62.765620694925246	Emx-Cre+;POMT2F/F	Emx-POMT2-cKO	Emx-POMT2	TBR1
9	JJ013	44.67599310907377	Emx-Cre+;POMT2F/F	Emx-POMT2-cKO	Emx-POMT2	TBR1
9	JJ014	19.50730176903797	Emx-Cre+;POMT2F/F	Emx-POMT2-cKO	Emx-POMT2	TBR1
9	JJ015	142.69585243589745	Emx-Cre+;POMT2F/+	Emx-POMT2-Ctrl	Emx-POMT2	TBR1
9	JJ016	82.1073238314176	Emx-Cre+;POMT2F/F	Emx-POMT2-cKO	Emx-POMT2	TBR1
9	JJ041	132.92562105128206	Emx-Cre+;POMT2F/F	Emx-POMT2-cKO	Emx-POMT2	TBR1
9	JJ042	22.451999781400957	Emx-Cre+;POMT2F/F	Emx-POMT2-cKO	Emx-POMT2	TBR1
9	JJ043	94.2497573529357	Emx-Cre+;POMT2F/F	Emx-POMT2-cKO	Emx-POMT2	TBR1
9	JJ044	114.51013961437114	Emx-Cre+;POMT2F/F	Emx-POMT2-cKO	Emx-POMT2	TBR1
9	JJ045	55.03237555656697	Emx-Cre+;POMT2F/+	Emx-POMT2-Ctrl	Emx-POMT2	TBR1
9	JJ046	85.60878141348262	Emx-Cre+;POMT2F/+	Emx-POMT2-Ctrl	Emx-POMT2	TBR1
9	JJ047	19.559855451089714	Emx-Cre+;POMT2F/+	Emx-POMT2-Ctrl	Emx-POMT2	TBR1
9	JJ048	38.618290717171725	Emx-Cre+;POMT2F/+	Emx-POMT2-Ctrl	Emx-POMT2	TBR1
9	JJ049	115.84153277505276	Emx-Cre+;POMT2F/+	Emx-POMT2-Ctrl	Emx-POMT2	TBR1
9	JJ050	31.553182867046512	Emx-Cre+;POMT2F/+	Emx-POMT2-Ctrl	Emx-POMT2	TBR1
9	JJ051	97.59470534188036	Emx-Cre+;POMT2F/+	Emx-POMT2-Ctrl	Emx-POMT2	TBR1
9	JJ052	31.952716848466082	Emx-Cre+;POMT2F/+	Emx-POMT2-Ctrl	Emx-POMT2	TBR1
9	JJ061	77.83965080002928	WT	B4GAT1-Ctrl	B4GAT1	TBR1
9	JJ062	99.5513070581906	WT	B4GAT1-Ctrl	B4GAT1	TBR1
9	JJ063	71.54843920527321	WT	B4GAT1-Ctrl	B4GAT1	TBR1
9	JJ064	63.12975944854198	WT	B4GAT1-Ctrl	B4GAT1	TBR1
9	JJ065	62.67770255336618	B4GAT1M155T/M155T;Thy1	B4GAT1-Mutant	B4GAT1	TBR1
9	JJ066	50.743341069486995	B4GAT1M155T/M155T;Thy1	B4GAT1-Mutant	B4GAT1	TBR1
9	JJ067	29.073661649165654	B4GAT1M155T/M155T;Thy1	B4GAT1-Mutant	B4GAT1	TBR1
9	JJ068	36.78654144695281	B4GAT1M155T/M155T;Thy1	B4GAT1-Mutant	B4GAT1	TBR1
9	JJ078	149.79146917171718	B4GAT1M155T/M155T	B4GAT1-Mutant	B4GAT1	TBR1
9	JJ079	116.37484886427369	B4GAT1M155T/M155T	B4GAT1-Mutant	B4GAT1	TBR1
9	JJ080	128.97051632128702	B4GAT1M155T/M155T	B4GAT1-Mutant	B4GAT1	TBR1
9	JJ081	167.20832991108807	B4GAT1M155T/M155T	B4GAT1-Mutant	B4GAT1	TBR1
9	JJ082	147.09322203323603	B4GAT1M155T/M155T;Thy1	B4GAT1-Mutant	B4GAT1	TBR1
9	JJ083	169.1547546924223	B4GAT1M155T/M155T;Thy1	B4GAT1-Mutant	B4GAT1	TBR1
9	JJ084	138.48968569202898	B4GAT1M155T/M155T;Thy1	B4GAT1-Mutant	B4GAT1	TBR1
9	JJ085	47.443096675936225	B4GAT1M155T/M155T;Thy1	B4GAT1-Mutant	B4GAT1	TBR1
9	JJ094	140.2380213437731	B4GAT1M155T/M155T	B4GAT1-Mutant	B4GAT1	TBR1
9	JJ095	56.98947705522615	B4GAT1M155T/M155T	B4GAT1-Mutant	B4GAT1	TBR1
9	JJ096	56.107704164690404	B4GAT1M155T/M155T	B4GAT1-Mutant	B4GAT1	TBR1
9	JJ097	150.60992930942646	B4GAT1M155T/M155T	B4GAT1-Mutant	B4GAT1	TBR1
9	JJ098	190.2352150033602	B4GAT1M155T/M155T;Thy1	B4GAT1-Mutant	B4GAT1	TBR1
9	JJ099	75.50502241877548	B4GAT1M155T/M155T;Thy1	B4GAT1-Mutant	B4GAT1	TBR1
9	JJ100	129.05382708333335	B4GAT1M155T/M155T;Thy1	B4GAT1-Mutant	B4GAT1	TBR1
9	JJ101	92.50111251527369	B4GAT1M155T/M155T;Thy1	B4GAT1-Mutant	B4GAT1	TBR1
9	JJ102	204.01586806419144	WT	B4GAT1-Ctrl	B4GAT1	TBR1
9	JJ103	316.8981320179781	WT	B4GAT1-Ctrl	B4GAT1	TBR1
9	JJ104	156.3613541864062	WT	B4GAT1-Ctrl	B4GAT1	TBR1
9	JJ105	322.69608098067636	WT	B4GAT1-Ctrl	B4GAT1	TBR1
9	JJ110	176.21902568457236	WT	B4GAT1-Ctrl	B4GAT1	TBR1
9	JJ111	212.9745603764865	WT	B4GAT1-Ctrl	B4GAT1	TBR1
9	JJ112	194.83120553625812	WT	B4GAT1-Ctrl	B4GAT1	TBR1
9	JJ113	215.0611473434769	WT	B4GAT1-Ctrl	B4GAT1	TBR1
9	JJ122	79.86602791005298	Emx-Cre+;DGF/-	Emx-DG-cKO	Emx-DG	TBR1
9	JJ123	4.453798874853571	Emx-Cre+;DGF/-	Emx-DG-cKO	Emx-DG	TBR1
9	JJ124	81.20141342387016	Emx-Cre+;DGF/-	Emx-DG-cKO	Emx-DG	TBR1
9	JJ125	209.9274663762425	Emx-Cre+;DGF/-	Emx-DG-cKO	Emx-DG	TBR1
9	JJ142	328.4303100605651	Emx-Cre+;DGF/+	Emx-DG-Ctrl	Emx-DG	TBR1
9	JJ143	319.7792272744045	Emx-Cre+;DGF/+	Emx-DG-Ctrl	Emx-DG	TBR1
9	JJ144	175.47649694687706	Emx-Cre+;DGF/+	Emx-DG-Ctrl	Emx-DG	TBR1
9	JJ145	155.8552881971501	Emx-Cre+;DGF/+	Emx-DG-Ctrl	Emx-DG	TBR1
9	JJ150	125.82417899240268	Emx-Cre+;DGF/-	Emx-DG-cKO	Emx-DG	TBR1
9	JJ151	234.72863717974124	Emx-Cre+;DGF/-	Emx-DG-cKO	Emx-DG	TBR1
9	JJ152	175.79210827479315	Emx-Cre+;DGF/-	Emx-DG-cKO	Emx-DG	TBR1
9	JJ153	184.98825099238354	Emx-Cre+;DGF/-	Emx-DG-cKO	Emx-DG	TBR1
9	JJ166	18.825591464239153	Emx-Cre+;POMT2F/F	Emx-POMT2-cKO	Emx-POMT2	TBR1
9	JJ167	16.634153229220583	Emx-Cre+;POMT2F/F	Emx-POMT2-cKO	Emx-POMT2	TBR1
9	JJ168	26.438929647114282	Emx-Cre+;POMT2F/F	Emx-POMT2-cKO	Emx-POMT2	TBR1
9	JJ169	16.50611339740493	Emx-Cre+;POMT2F/F	Emx-POMT2-cKO	Emx-POMT2	TBR1
9	JJ170	45.92209646940099	Emx-Cre+;POMT2F/+	Emx-POMT2-Ctrl	Emx-POMT2	TBR1
9	JJ171	0.47268245566067435	Emx-Cre+;POMT2F/+	Emx-POMT2-Ctrl	Emx-POMT2	TBR1
9	JJ172	13.198464864574172	Emx-Cre+;POMT2F/+	Emx-POMT2-Ctrl	Emx-POMT2	TBR1
9	JJ173	41.29471209233221	Emx-Cre+;POMT2F/+	Emx-POMT2-Ctrl	Emx-POMT2	TBR1
9	JJ194	207.5484850656309	Emx-Cre+;POMT2F/F	Emx-POMT2-cKO	Emx-POMT2	TBR1
9	JJ195	282.0895481658633	Emx-Cre+;POMT2F/F	Emx-POMT2-cKO	Emx-POMT2	TBR1
9	JJ196	243.02326979603387	Emx-Cre+;POMT2F/F	Emx-POMT2-cKO	Emx-POMT2	TBR1
9	JJ197	431.50859999442963	Emx-Cre+;POMT2F/F	Emx-POMT2-cKO	Emx-POMT2	TBR1
9	JJ202	-21.46748650224784	Emx-Cre+;POMT2F/+	Emx-POMT2-Ctrl	Emx-POMT2	TBR1
9	JJ203	16.402188977832527	Emx-Cre+;POMT2F/+	Emx-POMT2-Ctrl	Emx-POMT2	TBR1
9	JJ204	122.39459778822057	Emx-Cre+;POMT2F/+	Emx-POMT2-Ctrl	Emx-POMT2	TBR1
9	JJ205	77.71065859649121	Emx-Cre+;POMT2F/+	Emx-POMT2-Ctrl	Emx-POMT2	TBR1
9	JJ210	235.64379576910633	Emx-Cre+;POMT2F/+	Emx-POMT2-Ctrl	Emx-POMT2	TBR1
9	JJ211	315.21806943997564	Emx-Cre+;POMT2F/+	Emx-POMT2-Ctrl	Emx-POMT2	TBR1
9	JJ212	104.1320799996693	Emx-Cre+;POMT2F/+	Emx-POMT2-Ctrl	Emx-POMT2	TBR1
9	JJ213	272.4185224483788	Emx-Cre+;POMT2F/+	Emx-POMT2-Ctrl	Emx-POMT2	TBR1
9	JJ214	273.58858497702585	DGdelta/-	ICD-Mutant	ICD	TBR1
9	JJ215	459.4232043450524	DGdelta/-	ICD-Mutant	ICD	TBR1
9	JJ216	267.062030405392	DGdelta/-	ICD-Mutant	ICD	TBR1
9	JJ217	275.3901955732285	DGdelta/-	ICD-Mutant	ICD	TBR1
9	JJ222	125.28570400322185	WT	ICD-Ctrl	ICD	TBR1
9	JJ223	504.6215441633439	WT	ICD-Ctrl	ICD	TBR1
9	JJ224	365.86255373654916	WT	ICD-Ctrl	ICD	TBR1
9	JJ225	296.1171233345794	WT	ICD-Ctrl	ICD	TBR1
9	JJ238	59.249783348553706	FKRPMut	FKRP-Mutant	FKRP	TBR1
9	JJ239	23.020356393391655	FKRPMut	FKRP-Mutant	FKRP	TBR1
9	JJ240	66.40559872915291	FKRPMut	FKRP-Mutant	FKRP	TBR1
9	JJ241	33.8589980747347	FKRPMut	FKRP-Mutant	FKRP	TBR1
9	JJ242	17.83231627350108	WT	FKRP-Ctrl	FKRP	TBR1
9	JJ243	105.62518833949741	WT	FKRP-Ctrl	FKRP	TBR1
9	JJ244	63.30051241850401	WT	FKRP-Ctrl	FKRP	TBR1
9	JJ245	26.681026267505974	WT	FKRP-Ctrl	FKRP	TBR1
9	JJ246	54.27874974382712	WT	FKRP-Ctrl	FKRP	TBR1
9	JJ247	52.123915081554514	WT	FKRP-Ctrl	FKRP	TBR1
9	JJ248	41.74427567189897	WT	FKRP-Ctrl	FKRP	TBR1
9	JJ249	-6.131497387121688	WT	FKRP-Ctrl	FKRP	TBR1
9	JJ250	394.3617375876668	FKRPMut	FKRP-Mutant	FKRP	TBR1
9	JJ251	150.6870351805293	FKRPMut	FKRP-Mutant	FKRP	TBR1
9	JJ252	396.0435448542748	FKRPMut	FKRP-Mutant	FKRP	TBR1
9	JJ253	481.9331349849597	FKRPMut	FKRP-Mutant	FKRP	TBR1
9	JJ254	287.82434745085476	WT	FKRP-Ctrl	FKRP	TBR1
9	JJ255	235.6192836183261	WT	FKRP-Ctrl	FKRP	TBR1
9	JJ256	232.98737188596488	WT	FKRP-Ctrl	FKRP	TBR1
9	JJ257	277.37665892316016	WT	FKRP-Ctrl	FKRP	TBR1
9	JJ310	211.5305895473492	DGdelta/-	ICD-Mutant	ICD	TBR1
9	JJ311	207.41809744844838	DGdelta/-	ICD-Mutant	ICD	TBR1
9	JJ312	391.04158345029236	DGdelta/-	ICD-Mutant	ICD	TBR1
9	JJ313	250.23301154626768	DGdelta/-	ICD-Mutant	ICD	TBR1
9	JJ318	266.74007448564436	DGdelta/-	ICD-Mutant	ICD	TBR1
9	JJ319	398.35804805841593	DGdelta/-	ICD-Mutant	ICD	TBR1
9	JJ320	244.19120656665862	DGdelta/-	ICD-Mutant	ICD	TBR1
9	JJ321	298.43605225342395	DGdelta/-	ICD-Mutant	ICD	TBR1
9	JJ326	171.58899860972167	WT	ICD-Ctrl	ICD	TBR1
9	JJ327	142.73224458543189	WT	ICD-Ctrl	ICD	TBR1
9	JJ328	207.23362919510373	WT	ICD-Ctrl	ICD	TBR1
9	JJ329	159.5149092189098	WT	ICD-Ctrl	ICD	TBR1
9	JJ334	358.6433147369008	WT	ICD-Ctrl	ICD	TBR1
9	JJ335	313.3404231191031	WT	ICD-Ctrl	ICD	TBR1
9	JJ336	203.02999364770608	WT	ICD-Ctrl	ICD	TBR1
9	JJ337	424.04617198412694	WT	ICD-Ctrl	ICD	TBR1
9	JJ338	168.52591108470287	FKRPMut	FKRP-Mutant	FKRP	TBR1
9	JJ339	339.6366412667084	FKRPMut	FKRP-Mutant	FKRP	TBR1
9	JJ340	212.2542106696175	FKRPMut	FKRP-Mutant	FKRP	TBR1
9	JJ341	236.42508836239026	FKRPMut	FKRP-Mutant	FKRP	TBR1
9	JJ342	323.56111765327563	WT	FKRP-Ctrl	FKRP	TBR1
9	JJ343	321.5301008850148	WT	FKRP-Ctrl	FKRP	TBR1
9	JJ344	334.8448066233422	WT	FKRP-Ctrl	FKRP	TBR1
9	JJ345	411.9110836946847	WT	FKRP-Ctrl	FKRP	TBR1
9	JJ358	113.03942394179899	Emx-Cre+;DGF/-	Emx-DG-cKO	Emx-DG	TBR1
9	JJ359	91.15566102530192	Emx-Cre+;DGF/-	Emx-DG-cKO	Emx-DG	TBR1
9	JJ360	236.83769819130347	Emx-Cre+;DGF/-	Emx-DG-cKO	Emx-DG	TBR1
9	JJ361	267.22693058853537	Emx-Cre+;DGF/-	Emx-DG-cKO	Emx-DG	TBR1
9	JJ366	329.3028598070509	Emx-Cre+;DGF/+	Emx-DG-Ctrl	Emx-DG	TBR1
9	JJ367	57.2469543821021	Emx-Cre+;DGF/+	Emx-DG-Ctrl	Emx-DG	TBR1
9	JJ368	246.08993431600285	Emx-Cre+;DGF/+	Emx-DG-Ctrl	Emx-DG	TBR1
9	JJ369	53.31503248517788	Emx-Cre+;DGF/+	Emx-DG-Ctrl	Emx-DG	TBR1
9	JJ374	169.59105836677517	Emx-Cre+;DGF/-	Emx-DG-cKO	Emx-DG	TBR1
9	JJ375	156.47216622602082	Emx-Cre+;DGF/-	Emx-DG-cKO	Emx-DG	TBR1
9	JJ376	496.7127041945893	Emx-Cre+;DGF/-	Emx-DG-cKO	Emx-DG	TBR1
9	JJ377	314.221732906377	Emx-Cre+;DGF/-	Emx-DG-cKO	Emx-DG	TBR1
9	JJ382	167.1377132797121	Emx-Cre+;DGF/-	Emx-DG-cKO	Emx-DG	TBR1
9	JJ383	256.2592114333127	Emx-Cre+;DGF/-	Emx-DG-cKO	Emx-DG	TBR1
9	JJ384	179.08379173916785	Emx-Cre+;DGF/-	Emx-DG-cKO	Emx-DG	TBR1
9	JJ385	210.32404990913236	Emx-Cre+;DGF/-	Emx-DG-cKO	Emx-DG	TBR1
9	JJ389	204.54394222457492	Emx-Cre+;DGF/+	Emx-DG-Ctrl	Emx-DG	TBR1
9	JJ390	387.50340029486443	Emx-Cre+;DGF/+	Emx-DG-Ctrl	Emx-DG	TBR1
9	JJ391	583.5563861879309	Emx-Cre+;DGF/+	Emx-DG-Ctrl	Emx-DG	TBR1
9	JJ396	180.80153619265866	Emx-Cre+;DGF/+	Emx-DG-Ctrl	Emx-DG	TBR1
9	JJ397	153.08612422178126	Emx-Cre+;DGF/+	Emx-DG-Ctrl	Emx-DG	TBR1
9	JJ398	366.9479498401876	Emx-Cre+;DGF/+	Emx-DG-Ctrl	Emx-DG	TBR1
9	JJ399	186.69486898909898	Emx-Cre+;DGF/+	Emx-DG-Ctrl	Emx-DG	TBR1
10	JJ009	45.871415227854605	Emx-Cre+;POMT2F/+	Emx-POMT2-Ctrl	Emx-POMT2	TBR1
10	JJ010	71.05256718421138	Emx-Cre+;POMT2F/+	Emx-POMT2-Ctrl	Emx-POMT2	TBR1
10	JJ011	99.01715874194703	Emx-Cre+;POMT2F/+	Emx-POMT2-Ctrl	Emx-POMT2	TBR1
10	JJ012	77.72678354046748	Emx-Cre+;POMT2F/F	Emx-POMT2-cKO	Emx-POMT2	TBR1
10	JJ013	27.942458802681983	Emx-Cre+;POMT2F/F	Emx-POMT2-cKO	Emx-POMT2	TBR1
10	JJ014	67.22503922750481	Emx-Cre+;POMT2F/F	Emx-POMT2-cKO	Emx-POMT2	TBR1
10	JJ015	153.24558324786327	Emx-Cre+;POMT2F/+	Emx-POMT2-Ctrl	Emx-POMT2	TBR1
10	JJ016	107.76976252873563	Emx-Cre+;POMT2F/F	Emx-POMT2-cKO	Emx-POMT2	TBR1
10	JJ041	98.37247951282048	Emx-Cre+;POMT2F/F	Emx-POMT2-cKO	Emx-POMT2	TBR1
10	JJ042	16.788723380434778	Emx-Cre+;POMT2F/F	Emx-POMT2-cKO	Emx-POMT2	TBR1
10	JJ043	95.86924713926051	Emx-Cre+;POMT2F/F	Emx-POMT2-cKO	Emx-POMT2	TBR1
10	JJ044	55.224917996013666	Emx-Cre+;POMT2F/F	Emx-POMT2-cKO	Emx-POMT2	TBR1
10	JJ045	99.22750331709146	Emx-Cre+;POMT2F/+	Emx-POMT2-Ctrl	Emx-POMT2	TBR1
10	JJ046	90.47814687241983	Emx-Cre+;POMT2F/+	Emx-POMT2-Ctrl	Emx-POMT2	TBR1
10	JJ047	193.9620559804215	Emx-Cre+;POMT2F/+	Emx-POMT2-Ctrl	Emx-POMT2	TBR1
10	JJ048	81.80312009793586	Emx-Cre+;POMT2F/+	Emx-POMT2-Ctrl	Emx-POMT2	TBR1
10	JJ049	59.88213257202036	Emx-Cre+;POMT2F/+	Emx-POMT2-Ctrl	Emx-POMT2	TBR1
10	JJ050	83.8479988594492	Emx-Cre+;POMT2F/+	Emx-POMT2-Ctrl	Emx-POMT2	TBR1
10	JJ051	155.46213601614434	Emx-Cre+;POMT2F/+	Emx-POMT2-Ctrl	Emx-POMT2	TBR1
10	JJ052	70.89991652888229	Emx-Cre+;POMT2F/+	Emx-POMT2-Ctrl	Emx-POMT2	TBR1
10	JJ061	111.79046984189725	WT	B4GAT1-Ctrl	B4GAT1	TBR1
10	JJ062	96.38184097123408	WT	B4GAT1-Ctrl	B4GAT1	TBR1
10	JJ063	77.18357728904982	WT	B4GAT1-Ctrl	B4GAT1	TBR1
10	JJ064	42.405219066541086	WT	B4GAT1-Ctrl	B4GAT1	TBR1
10	JJ065	52.743719329501914	B4GAT1M155T/M155T;Thy1	B4GAT1-Mutant	B4GAT1	TBR1
10	JJ066	60.29741777766069	B4GAT1M155T/M155T;Thy1	B4GAT1-Mutant	B4GAT1	TBR1
10	JJ067	42.94684978103377	B4GAT1M155T/M155T;Thy1	B4GAT1-Mutant	B4GAT1	TBR1
10	JJ068	23.655620088928107	B4GAT1M155T/M155T;Thy1	B4GAT1-Mutant	B4GAT1	TBR1
10	JJ078	120.57505093939392	B4GAT1M155T/M155T	B4GAT1-Mutant	B4GAT1	TBR1
10	JJ079	89.63407418691668	B4GAT1M155T/M155T	B4GAT1-Mutant	B4GAT1	TBR1
10	JJ080	165.65162494963667	B4GAT1M155T/M155T	B4GAT1-Mutant	B4GAT1	TBR1
10	JJ081	141.7832421333103	B4GAT1M155T/M155T	B4GAT1-Mutant	B4GAT1	TBR1
10	JJ082	87.59505298561699	B4GAT1M155T/M155T;Thy1	B4GAT1-Mutant	B4GAT1	TBR1
10	JJ083	161.0076572010886	B4GAT1M155T/M155T;Thy1	B4GAT1-Mutant	B4GAT1	TBR1
10	JJ084	155.40111346980677	B4GAT1M155T/M155T;Thy1	B4GAT1-Mutant	B4GAT1	TBR1
10	JJ085	87.23049815906562	B4GAT1M155T/M155T;Thy1	B4GAT1-Mutant	B4GAT1	TBR1
10	JJ094	84.4232308024407	B4GAT1M155T/M155T	B4GAT1-Mutant	B4GAT1	TBR1
10	JJ095	55.00008527217829	B4GAT1M155T/M155T	B4GAT1-Mutant	B4GAT1	TBR1
10	JJ096	103.64647212252966	B4GAT1M155T/M155T	B4GAT1-Mutant	B4GAT1	TBR1
10	JJ097	145.35251117696848	B4GAT1M155T/M155T	B4GAT1-Mutant	B4GAT1	TBR1
10	JJ098	155.26775431787632	B4GAT1M155T/M155T;Thy1	B4GAT1-Mutant	B4GAT1	TBR1
10	JJ099	123.18717799750495	B4GAT1M155T/M155T;Thy1	B4GAT1-Mutant	B4GAT1	TBR1
10	JJ100	77.44485422979797	B4GAT1M155T/M155T;Thy1	B4GAT1-Mutant	B4GAT1	TBR1
10	JJ101	150.1583827172939	B4GAT1M155T/M155T;Thy1	B4GAT1-Mutant	B4GAT1	TBR1
10	JJ102	159.4516801963396	WT	B4GAT1-Ctrl	B4GAT1	TBR1
10	JJ103	126.23150058940676	WT	B4GAT1-Ctrl	B4GAT1	TBR1
10	JJ104	156.14314233726768	WT	B4GAT1-Ctrl	B4GAT1	TBR1
10	JJ105	327.66448508881456	WT	B4GAT1-Ctrl	B4GAT1	TBR1
10	JJ110	153.30049379866347	WT	B4GAT1-Ctrl	B4GAT1	TBR1
10	JJ111	119.70203582058265	WT	B4GAT1-Ctrl	B4GAT1	TBR1
10	JJ112	217.55159313280373	WT	B4GAT1-Ctrl	B4GAT1	TBR1
10	JJ113	213.4645683386964	WT	B4GAT1-Ctrl	B4GAT1	TBR1
10	JJ122	86.24081418456278	Emx-Cre+;DGF/-	Emx-DG-cKO	Emx-DG	TBR1
10	JJ123	21.09263599755506	Emx-Cre+;DGF/-	Emx-DG-cKO	Emx-DG	TBR1
10	JJ124	94.48692027777481	Emx-Cre+;DGF/-	Emx-DG-cKO	Emx-DG	TBR1
10	JJ125	155.2118261766444	Emx-Cre+;DGF/-	Emx-DG-cKO	Emx-DG	TBR1
10	JJ142	259.468526133323	Emx-Cre+;DGF/+	Emx-DG-Ctrl	Emx-DG	TBR1
10	JJ143	256.23328307483763	Emx-Cre+;DGF/+	Emx-DG-Ctrl	Emx-DG	TBR1
10	JJ144	275.70222153484764	Emx-Cre+;DGF/+	Emx-DG-Ctrl	Emx-DG	TBR1
10	JJ145	85.84099065025248	Emx-Cre+;DGF/+	Emx-DG-Ctrl	Emx-DG	TBR1
10	JJ150	95.9460342820513	Emx-Cre+;DGF/-	Emx-DG-cKO	Emx-DG	TBR1
10	JJ151	213.4844758097145	Emx-Cre+;DGF/-	Emx-DG-cKO	Emx-DG	TBR1
10	JJ152	243.51705158845482	Emx-Cre+;DGF/-	Emx-DG-cKO	Emx-DG	TBR1
10	JJ153	253.85614920026885	Emx-Cre+;DGF/-	Emx-DG-cKO	Emx-DG	TBR1
10	JJ166	25.380955165770597	Emx-Cre+;POMT2F/F	Emx-POMT2-cKO	Emx-POMT2	TBR1
10	JJ167	4.341206158297875	Emx-Cre+;POMT2F/F	Emx-POMT2-cKO	Emx-POMT2	TBR1
10	JJ168	16.892583083226935	Emx-Cre+;POMT2F/F	Emx-POMT2-cKO	Emx-POMT2	TBR1
10	JJ169	79.23831983515247	Emx-Cre+;POMT2F/F	Emx-POMT2-cKO	Emx-POMT2	TBR1
10	JJ170	-7.525007284856201	Emx-Cre+;POMT2F/+	Emx-POMT2-Ctrl	Emx-POMT2	TBR1
10	JJ171	34.78619821391055	Emx-Cre+;POMT2F/+	Emx-POMT2-Ctrl	Emx-POMT2	TBR1
10	JJ172	16.773586161361663	Emx-Cre+;POMT2F/+	Emx-POMT2-Ctrl	Emx-POMT2	TBR1
10	JJ173	-22.502229732867665	Emx-Cre+;POMT2F/+	Emx-POMT2-Ctrl	Emx-POMT2	TBR1
10	JJ194	115.89255746108142	Emx-Cre+;POMT2F/F	Emx-POMT2-cKO	Emx-POMT2	TBR1
10	JJ195	216.86253694351748	Emx-Cre+;POMT2F/F	Emx-POMT2-cKO	Emx-POMT2	TBR1
10	JJ196	245.78502540773323	Emx-Cre+;POMT2F/F	Emx-POMT2-cKO	Emx-POMT2	TBR1
10	JJ197	326.5645809807636	Emx-Cre+;POMT2F/F	Emx-POMT2-cKO	Emx-POMT2	TBR1
10	JJ202	29.264600479429344	Emx-Cre+;POMT2F/+	Emx-POMT2-Ctrl	Emx-POMT2	TBR1
10	JJ203	98.37747387110016	Emx-Cre+;POMT2F/+	Emx-POMT2-Ctrl	Emx-POMT2	TBR1
10	JJ204	133.562909024645	Emx-Cre+;POMT2F/+	Emx-POMT2-Ctrl	Emx-POMT2	TBR1
10	JJ205	79.63571912280698	Emx-Cre+;POMT2F/+	Emx-POMT2-Ctrl	Emx-POMT2	TBR1
10	JJ210	137.9715724166647	Emx-Cre+;POMT2F/+	Emx-POMT2-Ctrl	Emx-POMT2	TBR1
10	JJ211	271.79199108136896	Emx-Cre+;POMT2F/+	Emx-POMT2-Ctrl	Emx-POMT2	TBR1
10	JJ212	179.65253677436067	Emx-Cre+;POMT2F/+	Emx-POMT2-Ctrl	Emx-POMT2	TBR1
10	JJ213	277.9704612104192	Emx-Cre+;POMT2F/+	Emx-POMT2-Ctrl	Emx-POMT2	TBR1
10	JJ214	229.45255089181282	DGdelta/-	ICD-Mutant	ICD	TBR1
10	JJ215	424.0080886977326	DGdelta/-	ICD-Mutant	ICD	TBR1
10	JJ216	335.14153490616013	DGdelta/-	ICD-Mutant	ICD	TBR1
10	JJ217	251.39552962695248	DGdelta/-	ICD-Mutant	ICD	TBR1
10	JJ222	283.7327052658481	WT	ICD-Ctrl	ICD	TBR1
10	JJ223	274.72697578158073	WT	ICD-Ctrl	ICD	TBR1
10	JJ224	429.26798531971053	WT	ICD-Ctrl	ICD	TBR1
10	JJ225	288.9458609828007	WT	ICD-Ctrl	ICD	TBR1
10	JJ238	59.01474811045849	FKRPMut	FKRP-Mutant	FKRP	TBR1
10	JJ239	0.6051843136195506	FKRPMut	FKRP-Mutant	FKRP	TBR1
10	JJ240	129.88290913503056	FKRPMut	FKRP-Mutant	FKRP	TBR1
10	JJ241	81.60005666165667	FKRPMut	FKRP-Mutant	FKRP	TBR1
10	JJ242	12.67868710395885	WT	FKRP-Ctrl	FKRP	TBR1
10	JJ243	-22.670975614953893	WT	FKRP-Ctrl	FKRP	TBR1
10	JJ244	-39.6839938919771	WT	FKRP-Ctrl	FKRP	TBR1
10	JJ245	-24.382801419299994	WT	FKRP-Ctrl	FKRP	TBR1
10	JJ246	130.41568857098756	WT	FKRP-Ctrl	FKRP	TBR1
10	JJ247	133.49147333552264	WT	FKRP-Ctrl	FKRP	TBR1
10	JJ248	67.51384663282363	WT	FKRP-Ctrl	FKRP	TBR1
10	JJ249	-22.420589599655766	WT	FKRP-Ctrl	FKRP	TBR1
10	JJ250	347.20944057911976	FKRPMut	FKRP-Mutant	FKRP	TBR1
10	JJ251	422.840621817513	FKRPMut	FKRP-Mutant	FKRP	TBR1
10	JJ252	339.48548747184367	FKRPMut	FKRP-Mutant	FKRP	TBR1
10	JJ253	375.45357606627084	FKRPMut	FKRP-Mutant	FKRP	TBR1
10	JJ254	253.11288814411205	WT	FKRP-Ctrl	FKRP	TBR1
10	JJ255	268.0284881493506	WT	FKRP-Ctrl	FKRP	TBR1
10	JJ256	242.60414264619885	WT	FKRP-Ctrl	FKRP	TBR1
10	JJ257	258.3268522853535	WT	FKRP-Ctrl	FKRP	TBR1
10	JJ310	213.053026342221	DGdelta/-	ICD-Mutant	ICD	TBR1
10	JJ311	134.14669612827518	DGdelta/-	ICD-Mutant	ICD	TBR1
10	JJ312	267.9047179532163	DGdelta/-	ICD-Mutant	ICD	TBR1
10	JJ313	318.5861766649467	DGdelta/-	ICD-Mutant	ICD	TBR1
10	JJ318	268.90724083206595	DGdelta/-	ICD-Mutant	ICD	TBR1
10	JJ319	355.77876706426395	DGdelta/-	ICD-Mutant	ICD	TBR1
10	JJ320	369.6918733518326	DGdelta/-	ICD-Mutant	ICD	TBR1
10	JJ321	338.95573645255814	DGdelta/-	ICD-Mutant	ICD	TBR1
10	JJ326	183.07587946926435	WT	ICD-Ctrl	ICD	TBR1
10	JJ327	157.1629060501541	WT	ICD-Ctrl	ICD	TBR1
10	JJ328	310.16462633992666	WT	ICD-Ctrl	ICD	TBR1
10	JJ329	251.24411085137845	WT	ICD-Ctrl	ICD	TBR1
10	JJ334	362.1523030818891	WT	ICD-Ctrl	ICD	TBR1
10	JJ335	283.688947996448	WT	ICD-Ctrl	ICD	TBR1
10	JJ336	229.15529752169502	WT	ICD-Ctrl	ICD	TBR1
10	JJ337	357.11133397707226	WT	ICD-Ctrl	ICD	TBR1
10	JJ338	186.76372706833786	FKRPMut	FKRP-Mutant	FKRP	TBR1
10	JJ339	286.364092778822	FKRPMut	FKRP-Mutant	FKRP	TBR1
10	JJ340	116.10254141911496	FKRPMut	FKRP-Mutant	FKRP	TBR1
10	JJ341	210.26565379681588	FKRPMut	FKRP-Mutant	FKRP	TBR1
10	JJ342	273.70764520465144	WT	FKRP-Ctrl	FKRP	TBR1
10	JJ343	355.61246081192365	WT	FKRP-Ctrl	FKRP	TBR1
10	JJ344	340.8540815614501	WT	FKRP-Ctrl	FKRP	TBR1
10	JJ345	410.35719814700974	WT	FKRP-Ctrl	FKRP	TBR1
10	JJ358	158.10463161375662	Emx-Cre+;DGF/-	Emx-DG-cKO	Emx-DG	TBR1
10	JJ359	131.93445410765162	Emx-Cre+;DGF/-	Emx-DG-cKO	Emx-DG	TBR1
10	JJ360	217.56931264557522	Emx-Cre+;DGF/-	Emx-DG-cKO	Emx-DG	TBR1
10	JJ361	413.54866917980524	Emx-Cre+;DGF/-	Emx-DG-cKO	Emx-DG	TBR1
10	JJ366	253.42296160139176	Emx-Cre+;DGF/+	Emx-DG-Ctrl	Emx-DG	TBR1
10	JJ367	196.0536054504781	Emx-Cre+;DGF/+	Emx-DG-Ctrl	Emx-DG	TBR1
10	JJ368	218.13320557170366	Emx-Cre+;DGF/+	Emx-DG-Ctrl	Emx-DG	TBR1
10	JJ369	152.63172467885374	Emx-Cre+;DGF/+	Emx-DG-Ctrl	Emx-DG	TBR1
10	JJ374	156.61583536582557	Emx-Cre+;DGF/-	Emx-DG-cKO	Emx-DG	TBR1
10	JJ375	91.35361101505896	Emx-Cre+;DGF/-	Emx-DG-cKO	Emx-DG	TBR1
10	JJ376	408.8469095298897	Emx-Cre+;DGF/-	Emx-DG-cKO	Emx-DG	TBR1
10	JJ377	281.4416050871012	Emx-Cre+;DGF/-	Emx-DG-cKO	Emx-DG	TBR1
10	JJ382	130.91589872091367	Emx-Cre+;DGF/-	Emx-DG-cKO	Emx-DG	TBR1
10	JJ383	195.8532945935539	Emx-Cre+;DGF/-	Emx-DG-cKO	Emx-DG	TBR1
10	JJ384	63.616139360863905	Emx-Cre+;DGF/-	Emx-DG-cKO	Emx-DG	TBR1
10	JJ385	119.27106684588851	Emx-Cre+;DGF/-	Emx-DG-cKO	Emx-DG	TBR1
10	JJ389	199.74858619154102	Emx-Cre+;DGF/+	Emx-DG-Ctrl	Emx-DG	TBR1
10	JJ390	572.9107020010352	Emx-Cre+;DGF/+	Emx-DG-Ctrl	Emx-DG	TBR1
10	JJ391	452.39574089993397	Emx-Cre+;DGF/+	Emx-DG-Ctrl	Emx-DG	TBR1
10	JJ396	256.61570628638674	Emx-Cre+;DGF/+	Emx-DG-Ctrl	Emx-DG	TBR1
10	JJ397	178.45692033289242	Emx-Cre+;DGF/+	Emx-DG-Ctrl	Emx-DG	TBR1
10	JJ398	269.73437047510816	Emx-Cre+;DGF/+	Emx-DG-Ctrl	Emx-DG	TBR1
10	JJ399	355.3438956062017	Emx-Cre+;DGF/+	Emx-DG-Ctrl	Emx-DG	TBR1
11	JJ009	55.74301529302242	Emx-Cre+;POMT2F/+	Emx-POMT2-Ctrl	Emx-POMT2	TBR1
11	JJ010	100.47382126346544	Emx-Cre+;POMT2F/+	Emx-POMT2-Ctrl	Emx-POMT2	TBR1
11	JJ011	80.08179898898264	Emx-Cre+;POMT2F/+	Emx-POMT2-Ctrl	Emx-POMT2	TBR1
11	JJ012	96.940381055515	Emx-Cre+;POMT2F/F	Emx-POMT2-cKO	Emx-POMT2	TBR1
11	JJ013	39.90869919981149	Emx-Cre+;POMT2F/F	Emx-POMT2-cKO	Emx-POMT2	TBR1
11	JJ014	56.11585335633953	Emx-Cre+;POMT2F/F	Emx-POMT2-cKO	Emx-POMT2	TBR1
11	JJ015	168.2673267948718	Emx-Cre+;POMT2F/+	Emx-POMT2-Ctrl	Emx-POMT2	TBR1
11	JJ016	92.95602804597699	Emx-Cre+;POMT2F/F	Emx-POMT2-cKO	Emx-POMT2	TBR1
11	JJ041	73.04218207692308	Emx-Cre+;POMT2F/F	Emx-POMT2-cKO	Emx-POMT2	TBR1
11	JJ042	68.52765574758455	Emx-Cre+;POMT2F/F	Emx-POMT2-cKO	Emx-POMT2	TBR1
11	JJ043	93.61708219128576	Emx-Cre+;POMT2F/F	Emx-POMT2-cKO	Emx-POMT2	TBR1
11	JJ044	65.75566632377284	Emx-Cre+;POMT2F/F	Emx-POMT2-cKO	Emx-POMT2	TBR1
11	JJ045	104.35181965594586	Emx-Cre+;POMT2F/+	Emx-POMT2-Ctrl	Emx-POMT2	TBR1
11	JJ046	125.95451027821696	Emx-Cre+;POMT2F/+	Emx-POMT2-Ctrl	Emx-POMT2	TBR1
11	JJ047	101.99911999829874	Emx-Cre+;POMT2F/+	Emx-POMT2-Ctrl	Emx-POMT2	TBR1
11	JJ048	42.833347265261274	Emx-Cre+;POMT2F/+	Emx-POMT2-Ctrl	Emx-POMT2	TBR1
11	JJ049	128.3023273380887	Emx-Cre+;POMT2F/+	Emx-POMT2-Ctrl	Emx-POMT2	TBR1
11	JJ050	28.784803474833797	Emx-Cre+;POMT2F/+	Emx-POMT2-Ctrl	Emx-POMT2	TBR1
11	JJ051	163.9715899572649	Emx-Cre+;POMT2F/+	Emx-POMT2-Ctrl	Emx-POMT2	TBR1
11	JJ052	62.46464526726953	Emx-Cre+;POMT2F/+	Emx-POMT2-Ctrl	Emx-POMT2	TBR1
11	JJ061	105.89560539428098	WT	B4GAT1-Ctrl	B4GAT1	TBR1
11	JJ062	82.64954566161616	WT	B4GAT1-Ctrl	B4GAT1	TBR1
11	JJ063	130.683416090457	WT	B4GAT1-Ctrl	B4GAT1	TBR1
11	JJ064	71.24871817261909	WT	B4GAT1-Ctrl	B4GAT1	TBR1
11	JJ065	92.52090285440612	B4GAT1M155T/M155T;Thy1	B4GAT1-Mutant	B4GAT1	TBR1
11	JJ066	61.811160340985516	B4GAT1M155T/M155T;Thy1	B4GAT1-Mutant	B4GAT1	TBR1
11	JJ067	86.90058582498982	B4GAT1M155T/M155T;Thy1	B4GAT1-Mutant	B4GAT1	TBR1
11	JJ068	67.62282422473056	B4GAT1M155T/M155T;Thy1	B4GAT1-Mutant	B4GAT1	TBR1
11	JJ078	186.61830887590187	B4GAT1M155T/M155T	B4GAT1-Mutant	B4GAT1	TBR1
11	JJ079	107.48705256039504	B4GAT1M155T/M155T	B4GAT1-Mutant	B4GAT1	TBR1
11	JJ080	120.67409180437879	B4GAT1M155T/M155T	B4GAT1-Mutant	B4GAT1	TBR1
11	JJ081	259.7476318971321	B4GAT1M155T/M155T	B4GAT1-Mutant	B4GAT1	TBR1
11	JJ082	169.67239154609865	B4GAT1M155T/M155T;Thy1	B4GAT1-Mutant	B4GAT1	TBR1
11	JJ083	178.39608728075777	B4GAT1M155T/M155T;Thy1	B4GAT1-Mutant	B4GAT1	TBR1
11	JJ084	125.45620571618359	B4GAT1M155T/M155T;Thy1	B4GAT1-Mutant	B4GAT1	TBR1
11	JJ085	94.43584265294771	B4GAT1M155T/M155T;Thy1	B4GAT1-Mutant	B4GAT1	TBR1
11	JJ094	169.11655353015306	B4GAT1M155T/M155T	B4GAT1-Mutant	B4GAT1	TBR1
11	JJ095	58.083691596288965	B4GAT1M155T/M155T	B4GAT1-Mutant	B4GAT1	TBR1
11	JJ096	173.58611704347825	B4GAT1M155T/M155T	B4GAT1-Mutant	B4GAT1	TBR1
11	JJ097	195.64678382076053	B4GAT1M155T/M155T	B4GAT1-Mutant	B4GAT1	TBR1
11	JJ098	173.87478489583336	B4GAT1M155T/M155T;Thy1	B4GAT1-Mutant	B4GAT1	TBR1
11	JJ099	130.31541295764586	B4GAT1M155T/M155T;Thy1	B4GAT1-Mutant	B4GAT1	TBR1
11	JJ100	144.99829583333332	B4GAT1M155T/M155T;Thy1	B4GAT1-Mutant	B4GAT1	TBR1
11	JJ101	99.36552539406159	B4GAT1M155T/M155T;Thy1	B4GAT1-Mutant	B4GAT1	TBR1
11	JJ102	136.15699998965724	WT	B4GAT1-Ctrl	B4GAT1	TBR1
11	JJ103	272.43248963702575	WT	B4GAT1-Ctrl	B4GAT1	TBR1
11	JJ104	173.37628054782257	WT	B4GAT1-Ctrl	B4GAT1	TBR1
11	JJ105	327.719414204385	WT	B4GAT1-Ctrl	B4GAT1	TBR1
11	JJ110	188.07042231292485	WT	B4GAT1-Ctrl	B4GAT1	TBR1
11	JJ111	134.51689011724383	WT	B4GAT1-Ctrl	B4GAT1	TBR1
11	JJ112	219.86152289131684	WT	B4GAT1-Ctrl	B4GAT1	TBR1
11	JJ113	168.86662973131521	WT	B4GAT1-Ctrl	B4GAT1	TBR1
11	JJ122	47.790946117335885	Emx-Cre+;DGF/-	Emx-DG-cKO	Emx-DG	TBR1
11	JJ123	94.05171574713385	Emx-Cre+;DGF/-	Emx-DG-cKO	Emx-DG	TBR1
11	JJ124	44.95267666048733	Emx-Cre+;DGF/-	Emx-DG-cKO	Emx-DG	TBR1
11	JJ125	150.06757149320154	Emx-Cre+;DGF/-	Emx-DG-cKO	Emx-DG	TBR1
11	JJ142	258.9116775536231	Emx-Cre+;DGF/+	Emx-DG-Ctrl	Emx-DG	TBR1
11	JJ143	330.02599737018994	Emx-Cre+;DGF/+	Emx-DG-Ctrl	Emx-DG	TBR1
11	JJ144	281.47763472587116	Emx-Cre+;DGF/+	Emx-DG-Ctrl	Emx-DG	TBR1
11	JJ145	213.29495053481241	Emx-Cre+;DGF/+	Emx-DG-Ctrl	Emx-DG	TBR1
11	JJ150	94.780302297246	Emx-Cre+;DGF/-	Emx-DG-cKO	Emx-DG	TBR1
11	JJ151	237.2312874638673	Emx-Cre+;DGF/-	Emx-DG-cKO	Emx-DG	TBR1
11	JJ152	208.37642801363452	Emx-Cre+;DGF/-	Emx-DG-cKO	Emx-DG	TBR1
11	JJ153	245.64107375224012	Emx-Cre+;DGF/-	Emx-DG-cKO	Emx-DG	TBR1
11	JJ166	52.49244571643859	Emx-Cre+;POMT2F/F	Emx-POMT2-cKO	Emx-POMT2	TBR1
11	JJ167	-10.873948279821454	Emx-Cre+;POMT2F/F	Emx-POMT2-cKO	Emx-POMT2	TBR1
11	JJ168	19.141205220306517	Emx-Cre+;POMT2F/F	Emx-POMT2-cKO	Emx-POMT2	TBR1
11	JJ169	35.8606570481986	Emx-Cre+;POMT2F/F	Emx-POMT2-cKO	Emx-POMT2	TBR1
11	JJ170	40.86530418887128	Emx-Cre+;POMT2F/+	Emx-POMT2-Ctrl	Emx-POMT2	TBR1
11	JJ171	61.42609673541593	Emx-Cre+;POMT2F/+	Emx-POMT2-Ctrl	Emx-POMT2	TBR1
11	JJ172	30.751721585764813	Emx-Cre+;POMT2F/+	Emx-POMT2-Ctrl	Emx-POMT2	TBR1
11	JJ173	34.321523313727276	Emx-Cre+;POMT2F/+	Emx-POMT2-Ctrl	Emx-POMT2	TBR1
11	JJ194	123.19191295466369	Emx-Cre+;POMT2F/F	Emx-POMT2-cKO	Emx-POMT2	TBR1
11	JJ195	270.7108022877271	Emx-Cre+;POMT2F/F	Emx-POMT2-cKO	Emx-POMT2	TBR1
11	JJ196	252.74147473563255	Emx-Cre+;POMT2F/F	Emx-POMT2-cKO	Emx-POMT2	TBR1
11	JJ197	246.0646558470738	Emx-Cre+;POMT2F/F	Emx-POMT2-cKO	Emx-POMT2	TBR1
11	JJ202	44.68612132125978	Emx-Cre+;POMT2F/+	Emx-POMT2-Ctrl	Emx-POMT2	TBR1
11	JJ203	89.90638191707721	Emx-Cre+;POMT2F/+	Emx-POMT2-Ctrl	Emx-POMT2	TBR1
11	JJ204	119.53501128028408	Emx-Cre+;POMT2F/+	Emx-POMT2-Ctrl	Emx-POMT2	TBR1
11	JJ205	38.035062105263115	Emx-Cre+;POMT2F/+	Emx-POMT2-Ctrl	Emx-POMT2	TBR1
11	JJ210	82.81710820668862	Emx-Cre+;POMT2F/+	Emx-POMT2-Ctrl	Emx-POMT2	TBR1
11	JJ211	199.01987227549932	Emx-Cre+;POMT2F/+	Emx-POMT2-Ctrl	Emx-POMT2	TBR1
11	JJ212	153.3467362055776	Emx-Cre+;POMT2F/+	Emx-POMT2-Ctrl	Emx-POMT2	TBR1
11	JJ213	329.495882942206	Emx-Cre+;POMT2F/+	Emx-POMT2-Ctrl	Emx-POMT2	TBR1
11	JJ214	292.383627917711	DGdelta/-	ICD-Mutant	ICD	TBR1
11	JJ215	286.7950743193954	DGdelta/-	ICD-Mutant	ICD	TBR1
11	JJ216	268.8490972055811	DGdelta/-	ICD-Mutant	ICD	TBR1
11	JJ217	358.9308585768915	DGdelta/-	ICD-Mutant	ICD	TBR1
11	JJ222	171.4478221489651	WT	ICD-Ctrl	ICD	TBR1
11	JJ223	438.8286765003789	WT	ICD-Ctrl	ICD	TBR1
11	JJ224	287.1768865305367	WT	ICD-Ctrl	ICD	TBR1
11	JJ225	282.99228308425	WT	ICD-Ctrl	ICD	TBR1
11	JJ238	50.06798942913978	FKRPMut	FKRP-Mutant	FKRP	TBR1
11	JJ239	118.5694873820283	FKRPMut	FKRP-Mutant	FKRP	TBR1
11	JJ240	64.67267674809011	FKRPMut	FKRP-Mutant	FKRP	TBR1
11	JJ241	217.92969503012606	FKRPMut	FKRP-Mutant	FKRP	TBR1
11	JJ242	37.55890684798294	WT	FKRP-Ctrl	FKRP	TBR1
11	JJ243	-62.76953258872894	WT	FKRP-Ctrl	FKRP	TBR1
11	JJ244	0.5651394677765893	WT	FKRP-Ctrl	FKRP	TBR1
11	JJ245	50.04730904873437	WT	FKRP-Ctrl	FKRP	TBR1
11	JJ246	155.47177054629628	WT	FKRP-Ctrl	FKRP	TBR1
11	JJ247	80.8533727991243	WT	FKRP-Ctrl	FKRP	TBR1
11	JJ248	125.63847617539788	WT	FKRP-Ctrl	FKRP	TBR1
11	JJ249	60.527571295291146	WT	FKRP-Ctrl	FKRP	TBR1
11	JJ250	216.8615138697181	FKRPMut	FKRP-Mutant	FKRP	TBR1
11	JJ251	151.04175125185262	FKRPMut	FKRP-Mutant	FKRP	TBR1
11	JJ252	302.9535031225005	FKRPMut	FKRP-Mutant	FKRP	TBR1
11	JJ253	484.22178594281417	FKRPMut	FKRP-Mutant	FKRP	TBR1
11	JJ254	337.67876311545837	WT	FKRP-Ctrl	FKRP	TBR1
11	JJ255	322.20722335858574	WT	FKRP-Ctrl	FKRP	TBR1
11	JJ256	123.47179196393768	WT	FKRP-Ctrl	FKRP	TBR1
11	JJ257	207.52821808621934	WT	FKRP-Ctrl	FKRP	TBR1
11	JJ310	185.1292344856208	DGdelta/-	ICD-Mutant	ICD	TBR1
11	JJ311	101.49053366783869	DGdelta/-	ICD-Mutant	ICD	TBR1
11	JJ312	375.6298892007797	DGdelta/-	ICD-Mutant	ICD	TBR1
11	JJ313	337.8119713559225	DGdelta/-	ICD-Mutant	ICD	TBR1
11	JJ318	268.4938138697171	DGdelta/-	ICD-Mutant	ICD	TBR1
11	JJ319	475.7887365087084	DGdelta/-	ICD-Mutant	ICD	TBR1
11	JJ320	252.44183753820982	DGdelta/-	ICD-Mutant	ICD	TBR1
11	JJ321	260.0660910380961	DGdelta/-	ICD-Mutant	ICD	TBR1
11	JJ326	177.50752574205296	WT	ICD-Ctrl	ICD	TBR1
11	JJ327	240.96703948343745	WT	ICD-Ctrl	ICD	TBR1
11	JJ328	324.5112582800711	WT	ICD-Ctrl	ICD	TBR1
11	JJ329	295.7323809986719	WT	ICD-Ctrl	ICD	TBR1
11	JJ334	389.44829142687746	WT	ICD-Ctrl	ICD	TBR1
11	JJ335	393.05176196470194	WT	ICD-Ctrl	ICD	TBR1
11	JJ336	223.0212220427678	WT	ICD-Ctrl	ICD	TBR1
11	JJ337	399.07913200966976	WT	ICD-Ctrl	ICD	TBR1
11	JJ338	270.16923145430275	FKRPMut	FKRP-Mutant	FKRP	TBR1
11	JJ339	226.88652366019213	FKRPMut	FKRP-Mutant	FKRP	TBR1
11	JJ340	163.4240156085058	FKRPMut	FKRP-Mutant	FKRP	TBR1
11	JJ341	254.77734723295495	FKRPMut	FKRP-Mutant	FKRP	TBR1
11	JJ342	152.15530578458876	WT	FKRP-Ctrl	FKRP	TBR1
11	JJ343	278.0091009618703	WT	FKRP-Ctrl	FKRP	TBR1
11	JJ344	354.99564322811665	WT	FKRP-Ctrl	FKRP	TBR1
11	JJ345	225.36029380962722	WT	FKRP-Ctrl	FKRP	TBR1
11	JJ358	95.47593584656083	Emx-Cre+;DGF/-	Emx-DG-cKO	Emx-DG	TBR1
11	JJ359	96.55923225986983	Emx-Cre+;DGF/-	Emx-DG-cKO	Emx-DG	TBR1
11	JJ360	226.9852532029345	Emx-Cre+;DGF/-	Emx-DG-cKO	Emx-DG	TBR1
11	JJ361	359.2020888226624	Emx-Cre+;DGF/-	Emx-DG-cKO	Emx-DG	TBR1
11	JJ366	265.07377423079134	Emx-Cre+;DGF/+	Emx-DG-Ctrl	Emx-DG	TBR1
11	JJ367	185.158606305179	Emx-Cre+;DGF/+	Emx-DG-Ctrl	Emx-DG	TBR1
11	JJ368	272.8534975044086	Emx-Cre+;DGF/+	Emx-DG-Ctrl	Emx-DG	TBR1
11	JJ369	206.71064035737814	Emx-Cre+;DGF/+	Emx-DG-Ctrl	Emx-DG	TBR1
11	JJ374	92.19193639146658	Emx-Cre+;DGF/-	Emx-DG-cKO	Emx-DG	TBR1
11	JJ375	118.1816600531813	Emx-Cre+;DGF/-	Emx-DG-cKO	Emx-DG	TBR1
11	JJ376	411.1347218887725	Emx-Cre+;DGF/-	Emx-DG-cKO	Emx-DG	TBR1
11	JJ377	425.6897439448665	Emx-Cre+;DGF/-	Emx-DG-cKO	Emx-DG	TBR1
11	JJ382	218.5809625258861	Emx-Cre+;DGF/-	Emx-DG-cKO	Emx-DG	TBR1
11	JJ383	254.53992803757265	Emx-Cre+;DGF/-	Emx-DG-cKO	Emx-DG	TBR1
11	JJ384	123.28825133713383	Emx-Cre+;DGF/-	Emx-DG-cKO	Emx-DG	TBR1
11	JJ385	222.86923244881493	Emx-Cre+;DGF/-	Emx-DG-cKO	Emx-DG	TBR1
11	JJ389	388.5057683808747	Emx-Cre+;DGF/+	Emx-DG-Ctrl	Emx-DG	TBR1
11	JJ390	290.80312460520935	Emx-Cre+;DGF/+	Emx-DG-Ctrl	Emx-DG	TBR1
11	JJ391	547.5065065075147	Emx-Cre+;DGF/+	Emx-DG-Ctrl	Emx-DG	TBR1
11	JJ396	350.4081085944919	Emx-Cre+;DGF/+	Emx-DG-Ctrl	Emx-DG	TBR1
11	JJ397	279.7522982958554	Emx-Cre+;DGF/+	Emx-DG-Ctrl	Emx-DG	TBR1
11	JJ398	367.666883332251	Emx-Cre+;DGF/+	Emx-DG-Ctrl	Emx-DG	TBR1
11	JJ399	294.2797220852782	Emx-Cre+;DGF/+	Emx-DG-Ctrl	Emx-DG	TBR1
12	JJ009	48.55855156821675	Emx-Cre+;POMT2F/+	Emx-POMT2-Ctrl	Emx-POMT2	TBR1
12	JJ010	84.55070662769866	Emx-Cre+;POMT2F/+	Emx-POMT2-Ctrl	Emx-POMT2	TBR1
12	JJ011	63.7270341520261	Emx-Cre+;POMT2F/+	Emx-POMT2-Ctrl	Emx-POMT2	TBR1
12	JJ012	64.26108231957511	Emx-Cre+;POMT2F/F	Emx-POMT2-cKO	Emx-POMT2	TBR1
12	JJ013	53.515250866174064	Emx-Cre+;POMT2F/F	Emx-POMT2-cKO	Emx-POMT2	TBR1
12	JJ014	89.2860669611208	Emx-Cre+;POMT2F/F	Emx-POMT2-cKO	Emx-POMT2	TBR1
12	JJ015	167.28045487179486	Emx-Cre+;POMT2F/+	Emx-POMT2-Ctrl	Emx-POMT2	TBR1
12	JJ016	83.40312191570881	Emx-Cre+;POMT2F/F	Emx-POMT2-cKO	Emx-POMT2	TBR1
12	JJ041	75.13789284615383	Emx-Cre+;POMT2F/F	Emx-POMT2-cKO	Emx-POMT2	TBR1
12	JJ042	26.861677486714996	Emx-Cre+;POMT2F/F	Emx-POMT2-cKO	Emx-POMT2	TBR1
12	JJ043	72.5566564833705	Emx-Cre+;POMT2F/F	Emx-POMT2-cKO	Emx-POMT2	TBR1
12	JJ044	43.929707618830456	Emx-Cre+;POMT2F/F	Emx-POMT2-cKO	Emx-POMT2	TBR1
12	JJ045	11.726101401977587	Emx-Cre+;POMT2F/+	Emx-POMT2-Ctrl	Emx-POMT2	TBR1
12	JJ046	42.814729823671506	Emx-Cre+;POMT2F/+	Emx-POMT2-Ctrl	Emx-POMT2	TBR1
12	JJ047	86.46795592700266	Emx-Cre+;POMT2F/+	Emx-POMT2-Ctrl	Emx-POMT2	TBR1
12	JJ048	106.99804110584101	Emx-Cre+;POMT2F/+	Emx-POMT2-Ctrl	Emx-POMT2	TBR1
12	JJ049	84.88317134465683	Emx-Cre+;POMT2F/+	Emx-POMT2-Ctrl	Emx-POMT2	TBR1
12	JJ050	91.29254455745489	Emx-Cre+;POMT2F/+	Emx-POMT2-Ctrl	Emx-POMT2	TBR1
12	JJ051	114.30844323361822	Emx-Cre+;POMT2F/+	Emx-POMT2-Ctrl	Emx-POMT2	TBR1
12	JJ052	87.88842945530371	Emx-Cre+;POMT2F/+	Emx-POMT2-Ctrl	Emx-POMT2	TBR1
12	JJ061	86.76494380861757	WT	B4GAT1-Ctrl	B4GAT1	TBR1
12	JJ062	86.72060036736936	WT	B4GAT1-Ctrl	B4GAT1	TBR1
12	JJ063	90.85906670703923	WT	B4GAT1-Ctrl	B4GAT1	TBR1
12	JJ064	84.61071531170955	WT	B4GAT1-Ctrl	B4GAT1	TBR1
12	JJ065	97.77390477011495	B4GAT1M155T/M155T;Thy1	B4GAT1-Mutant	B4GAT1	TBR1
12	JJ066	69.7874792494876	B4GAT1M155T/M155T;Thy1	B4GAT1-Mutant	B4GAT1	TBR1
12	JJ067	106.77406416849816	B4GAT1M155T/M155T;Thy1	B4GAT1-Mutant	B4GAT1	TBR1
12	JJ068	85.32066525986829	B4GAT1M155T/M155T;Thy1	B4GAT1-Mutant	B4GAT1	TBR1
12	JJ078	137.52002514574315	B4GAT1M155T/M155T	B4GAT1-Mutant	B4GAT1	TBR1
12	JJ079	216.5953255577788	B4GAT1M155T/M155T	B4GAT1-Mutant	B4GAT1	TBR1
12	JJ080	127.81101223358725	B4GAT1M155T/M155T	B4GAT1-Mutant	B4GAT1	TBR1
12	JJ081	191.39401897174295	B4GAT1M155T/M155T	B4GAT1-Mutant	B4GAT1	TBR1
12	JJ082	104.9982588057228	B4GAT1M155T/M155T;Thy1	B4GAT1-Mutant	B4GAT1	TBR1
12	JJ083	196.84481919403393	B4GAT1M155T/M155T;Thy1	B4GAT1-Mutant	B4GAT1	TBR1
12	JJ084	142.05662346980677	B4GAT1M155T/M155T;Thy1	B4GAT1-Mutant	B4GAT1	TBR1
12	JJ085	31.191916179087855	B4GAT1M155T/M155T;Thy1	B4GAT1-Mutant	B4GAT1	TBR1
12	JJ094	234.3349633805257	B4GAT1M155T/M155T	B4GAT1-Mutant	B4GAT1	TBR1
12	JJ095	85.11118599242423	B4GAT1M155T/M155T	B4GAT1-Mutant	B4GAT1	TBR1
12	JJ096	143.165797339921	B4GAT1M155T/M155T	B4GAT1-Mutant	B4GAT1	TBR1
12	JJ097	196.67688609500806	B4GAT1M155T/M155T	B4GAT1-Mutant	B4GAT1	TBR1
12	JJ098	200.91775431787633	B4GAT1M155T/M155T;Thy1	B4GAT1-Mutant	B4GAT1	TBR1
12	JJ099	189.35298667381196	B4GAT1M155T/M155T;Thy1	B4GAT1-Mutant	B4GAT1	TBR1
12	JJ100	67.13369955808082	B4GAT1M155T/M155T;Thy1	B4GAT1-Mutant	B4GAT1	TBR1
12	JJ101	175.4797687652737	B4GAT1M155T/M155T;Thy1	B4GAT1-Mutant	B4GAT1	TBR1
12	JJ102	228.07284402692432	WT	B4GAT1-Ctrl	B4GAT1	TBR1
12	JJ103	221.77511312908922	WT	B4GAT1-Ctrl	B4GAT1	TBR1
12	JJ104	245.99891202387735	WT	B4GAT1-Ctrl	B4GAT1	TBR1
12	JJ105	296.05887741508735	WT	B4GAT1-Ctrl	B4GAT1	TBR1
12	JJ110	218.141995867629	WT	B4GAT1-Ctrl	B4GAT1	TBR1
12	JJ111	142.6470619438846	WT	B4GAT1-Ctrl	B4GAT1	TBR1
12	JJ112	200.24402036931778	WT	B4GAT1-Ctrl	B4GAT1	TBR1
12	JJ113	180.94202832234225	WT	B4GAT1-Ctrl	B4GAT1	TBR1
12	JJ122	127.12599045284783	Emx-Cre+;DGF/-	Emx-DG-cKO	Emx-DG	TBR1
12	JJ123	83.06291135925449	Emx-Cre+;DGF/-	Emx-DG-cKO	Emx-DG	TBR1
12	JJ124	97.60279679996263	Emx-Cre+;DGF/-	Emx-DG-cKO	Emx-DG	TBR1
12	JJ125	120.20909654343977	Emx-Cre+;DGF/-	Emx-DG-cKO	Emx-DG	TBR1
12	JJ142	157.7359205265642	Emx-Cre+;DGF/+	Emx-DG-Ctrl	Emx-DG	TBR1
12	JJ143	442.8490635504332	Emx-Cre+;DGF/+	Emx-DG-Ctrl	Emx-DG	TBR1
12	JJ144	249.02864064024206	Emx-Cre+;DGF/+	Emx-DG-Ctrl	Emx-DG	TBR1
12	JJ145	13.714490217352099	Emx-Cre+;DGF/+	Emx-DG-Ctrl	Emx-DG	TBR1
12	JJ150	124.99871817568858	Emx-Cre+;DGF/-	Emx-DG-cKO	Emx-DG	TBR1
12	JJ151	297.28052050388527	Emx-Cre+;DGF/-	Emx-DG-cKO	Emx-DG	TBR1
12	JJ152	266.9547700079365	Emx-Cre+;DGF/-	Emx-DG-cKO	Emx-DG	TBR1
12	JJ153	216.1759176590502	Emx-Cre+;DGF/-	Emx-DG-cKO	Emx-DG	TBR1
12	JJ166	23.11630338994786	Emx-Cre+;POMT2F/F	Emx-POMT2-cKO	Emx-POMT2	TBR1
12	JJ167	-0.6730371829657997	Emx-Cre+;POMT2F/F	Emx-POMT2-cKO	Emx-POMT2	TBR1
12	JJ168	28.37774620735267	Emx-Cre+;POMT2F/F	Emx-POMT2-cKO	Emx-POMT2	TBR1
12	JJ169	35.250382818506694	Emx-Cre+;POMT2F/F	Emx-POMT2-cKO	Emx-POMT2	TBR1
12	JJ170	71.85525365064832	Emx-Cre+;POMT2F/+	Emx-POMT2-Ctrl	Emx-POMT2	TBR1
12	JJ171	89.49105108747374	Emx-Cre+;POMT2F/+	Emx-POMT2-Ctrl	Emx-POMT2	TBR1
12	JJ172	76.75599658871211	Emx-Cre+;POMT2F/+	Emx-POMT2-Ctrl	Emx-POMT2	TBR1
12	JJ173	13.247695908157956	Emx-Cre+;POMT2F/+	Emx-POMT2-Ctrl	Emx-POMT2	TBR1
12	JJ194	164.96055164549352	Emx-Cre+;POMT2F/F	Emx-POMT2-cKO	Emx-POMT2	TBR1
12	JJ195	450.8723402805586	Emx-Cre+;POMT2F/F	Emx-POMT2-cKO	Emx-POMT2	TBR1
12	JJ196	258.082816417493	Emx-Cre+;POMT2F/F	Emx-POMT2-cKO	Emx-POMT2	TBR1
12	JJ197	254.2924755143346	Emx-Cre+;POMT2F/F	Emx-POMT2-cKO	Emx-POMT2	TBR1
12	JJ202	32.89054188732083	Emx-Cre+;POMT2F/+	Emx-POMT2-Ctrl	Emx-POMT2	TBR1
12	JJ203	89.59097469211822	Emx-Cre+;POMT2F/+	Emx-POMT2-Ctrl	Emx-POMT2	TBR1
12	JJ204	178.05971483082712	Emx-Cre+;POMT2F/+	Emx-POMT2-Ctrl	Emx-POMT2	TBR1
12	JJ205	85.72175596491228	Emx-Cre+;POMT2F/+	Emx-POMT2-Ctrl	Emx-POMT2	TBR1
12	JJ210	215.94849559219244	Emx-Cre+;POMT2F/+	Emx-POMT2-Ctrl	Emx-POMT2	TBR1
12	JJ211	328.42162123209033	Emx-Cre+;POMT2F/+	Emx-POMT2-Ctrl	Emx-POMT2	TBR1
12	JJ212	415.89737185152114	Emx-Cre+;POMT2F/+	Emx-POMT2-Ctrl	Emx-POMT2	TBR1
12	JJ213	386.69784892104195	Emx-Cre+;POMT2F/+	Emx-POMT2-Ctrl	Emx-POMT2	TBR1
12	JJ214	267.0765072410192	DGdelta/-	ICD-Mutant	ICD	TBR1
12	JJ215	583.1719198571528	DGdelta/-	ICD-Mutant	ICD	TBR1
12	JJ216	430.07531007257074	DGdelta/-	ICD-Mutant	ICD	TBR1
12	JJ217	286.8896718247547	DGdelta/-	ICD-Mutant	ICD	TBR1
12	JJ222	153.26250562560327	WT	ICD-Ctrl	ICD	TBR1
12	JJ223	228.5508595210296	WT	ICD-Ctrl	ICD	TBR1
12	JJ224	417.941441120051	WT	ICD-Ctrl	ICD	TBR1
12	JJ225	264.9490644181201	WT	ICD-Ctrl	ICD	TBR1
12	JJ238	167.8249648920677	FKRPMut	FKRP-Mutant	FKRP	TBR1
12	JJ239	170.67028782738973	FKRPMut	FKRP-Mutant	FKRP	TBR1
12	JJ240	86.07002442467915	FKRPMut	FKRP-Mutant	FKRP	TBR1
12	JJ241	-7.06266113324773	FKRPMut	FKRP-Mutant	FKRP	TBR1
12	JJ242	96.19368808164461	WT	FKRP-Ctrl	FKRP	TBR1
12	JJ243	-17.49398988686558	WT	FKRP-Ctrl	FKRP	TBR1
12	JJ244	92.30152023096143	WT	FKRP-Ctrl	FKRP	TBR1
12	JJ245	64.94798736136379	WT	FKRP-Ctrl	FKRP	TBR1
12	JJ246	144.4293902993827	WT	FKRP-Ctrl	FKRP	TBR1
12	JJ247	57.047348097427516	WT	FKRP-Ctrl	FKRP	TBR1
12	JJ248	61.038261134386175	WT	FKRP-Ctrl	FKRP	TBR1
12	JJ249	106.27346302224196	WT	FKRP-Ctrl	FKRP	TBR1
12	JJ250	219.4391563910855	FKRPMut	FKRP-Mutant	FKRP	TBR1
12	JJ251	190.62525459529078	FKRPMut	FKRP-Mutant	FKRP	TBR1
12	JJ252	348.147858264126	FKRPMut	FKRP-Mutant	FKRP	TBR1
12	JJ253	403.4648434140784	FKRPMut	FKRP-Mutant	FKRP	TBR1
12	JJ254	200.14295471581195	WT	FKRP-Ctrl	FKRP	TBR1
12	JJ255	221.8233736038961	WT	FKRP-Ctrl	FKRP	TBR1
12	JJ256	292.6519654532164	WT	FKRP-Ctrl	FKRP	TBR1
12	JJ257	353.79672657106784	WT	FKRP-Ctrl	FKRP	TBR1
12	JJ310	167.0186375720405	DGdelta/-	ICD-Mutant	ICD	TBR1
12	JJ311	206.54912729661953	DGdelta/-	ICD-Mutant	ICD	TBR1
12	JJ312	296.74140567251453	DGdelta/-	ICD-Mutant	ICD	TBR1
12	JJ313	225.07188484061462	DGdelta/-	ICD-Mutant	ICD	TBR1
12	JJ318	267.15137706902584	DGdelta/-	ICD-Mutant	ICD	TBR1
12	JJ319	408.44837261981945	DGdelta/-	ICD-Mutant	ICD	TBR1
12	JJ320	250.05094018301543	DGdelta/-	ICD-Mutant	ICD	TBR1
12	JJ321	332.06463472095635	DGdelta/-	ICD-Mutant	ICD	TBR1
12	JJ326	234.93162180748178	WT	ICD-Ctrl	ICD	TBR1
12	JJ327	203.83687920481054	WT	ICD-Ctrl	ICD	TBR1
12	JJ328	229.56966646376557	WT	ICD-Ctrl	ICD	TBR1
12	JJ329	302.7224639693124	WT	ICD-Ctrl	ICD	TBR1
12	JJ334	381.3222352294517	WT	ICD-Ctrl	ICD	TBR1
12	JJ335	393.9076024464424	WT	ICD-Ctrl	ICD	TBR1
12	JJ336	128.6577193836985	WT	ICD-Ctrl	ICD	TBR1
12	JJ337	445.1328238359788	WT	ICD-Ctrl	ICD	TBR1
12	JJ338	227.70748448460574	FKRPMut	FKRP-Mutant	FKRP	TBR1
12	JJ339	306.087230147243	FKRPMut	FKRP-Mutant	FKRP	TBR1
12	JJ340	299.7044256829992	FKRPMut	FKRP-Mutant	FKRP	TBR1
12	JJ341	263.4716441142762	FKRPMut	FKRP-Mutant	FKRP	TBR1
12	JJ342	258.4162641527532	WT	FKRP-Ctrl	FKRP	TBR1
12	JJ343	250.67750997592387	WT	FKRP-Ctrl	FKRP	TBR1
12	JJ344	518.5893047665783	WT	FKRP-Ctrl	FKRP	TBR1
12	JJ345	419.9473701123092	WT	FKRP-Ctrl	FKRP	TBR1
12	JJ358	196.5591135361552	Emx-Cre+;DGF/-	Emx-DG-cKO	Emx-DG	TBR1
12	JJ359	69.44436917345006	Emx-Cre+;DGF/-	Emx-DG-cKO	Emx-DG	TBR1
12	JJ360	300.82785479023613	Emx-Cre+;DGF/-	Emx-DG-cKO	Emx-DG	TBR1
12	JJ361	363.4296425043202	Emx-Cre+;DGF/-	Emx-DG-cKO	Emx-DG	TBR1
12	JJ366	228.07031218800321	Emx-Cre+;DGF/+	Emx-DG-Ctrl	Emx-DG	TBR1
12	JJ367	99.2801188080444	Emx-Cre+;DGF/+	Emx-DG-Ctrl	Emx-DG	TBR1
12	JJ368	331.67032335421106	Emx-Cre+;DGF/+	Emx-DG-Ctrl	Emx-DG	TBR1
12	JJ369	181.98236773989893	Emx-Cre+;DGF/+	Emx-DG-Ctrl	Emx-DG	TBR1
12	JJ374	24.71217965425319	Emx-Cre+;DGF/-	Emx-DG-cKO	Emx-DG	TBR1
12	JJ375	143.59601218722014	Emx-Cre+;DGF/-	Emx-DG-cKO	Emx-DG	TBR1
12	JJ376	329.5116444445005	Emx-Cre+;DGF/-	Emx-DG-cKO	Emx-DG	TBR1
12	JJ377	272.3029131636652	Emx-Cre+;DGF/-	Emx-DG-cKO	Emx-DG	TBR1
12	JJ382	202.0207188125107	Emx-Cre+;DGF/-	Emx-DG-cKO	Emx-DG	TBR1
12	JJ383	273.6651981531702	Emx-Cre+;DGF/-	Emx-DG-cKO	Emx-DG	TBR1
12	JJ384	119.73106383051277	Emx-Cre+;DGF/-	Emx-DG-cKO	Emx-DG	TBR1
12	JJ385	241.8319335505682	Emx-Cre+;DGF/-	Emx-DG-cKO	Emx-DG	TBR1
12	JJ389	275.68586660750196	Emx-Cre+;DGF/+	Emx-DG-Ctrl	Emx-DG	TBR1
12	JJ390	464.6032135607315	Emx-Cre+;DGF/+	Emx-DG-Ctrl	Emx-DG	TBR1
12	JJ391	906.1336065725462	Emx-Cre+;DGF/+	Emx-DG-Ctrl	Emx-DG	TBR1
12	JJ396	233.37086382798626	Emx-Cre+;DGF/+	Emx-DG-Ctrl	Emx-DG	TBR1
12	JJ397	253.866352872575	Emx-Cre+;DGF/+	Emx-DG-Ctrl	Emx-DG	TBR1
12	JJ398	269.38769269733046	Emx-Cre+;DGF/+	Emx-DG-Ctrl	Emx-DG	TBR1
12	JJ399	265.1510343382426	Emx-Cre+;DGF/+	Emx-DG-Ctrl	Emx-DG	TBR1
13	JJ009	61.73848571149281	Emx-Cre+;POMT2F/+	Emx-POMT2-Ctrl	Emx-POMT2	TBR1
13	JJ010	81.52266220030641	Emx-Cre+;POMT2F/+	Emx-POMT2-Ctrl	Emx-POMT2	TBR1
13	JJ011	82.99366122986976	Emx-Cre+;POMT2F/+	Emx-POMT2-Ctrl	Emx-POMT2	TBR1
13	JJ012	119.6390683408523	Emx-Cre+;POMT2F/F	Emx-POMT2-cKO	Emx-POMT2	TBR1
13	JJ013	57.39990630921974	Emx-Cre+;POMT2F/F	Emx-POMT2-cKO	Emx-POMT2	TBR1
13	JJ014	97.71348007591625	Emx-Cre+;POMT2F/F	Emx-POMT2-cKO	Emx-POMT2	TBR1
13	JJ015	169.0980928205128	Emx-Cre+;POMT2F/+	Emx-POMT2-Ctrl	Emx-POMT2	TBR1
13	JJ016	76.77916444444445	Emx-Cre+;POMT2F/F	Emx-POMT2-cKO	Emx-POMT2	TBR1
13	JJ041	80.43485233333335	Emx-Cre+;POMT2F/F	Emx-POMT2-cKO	Emx-POMT2	TBR1
13	JJ042	31.071297051932373	Emx-Cre+;POMT2F/F	Emx-POMT2-cKO	Emx-POMT2	TBR1
13	JJ043	68.49452087578969	Emx-Cre+;POMT2F/F	Emx-POMT2-cKO	Emx-POMT2	TBR1
13	JJ044	65.20560677341985	Emx-Cre+;POMT2F/F	Emx-POMT2-cKO	Emx-POMT2	TBR1
13	JJ045	52.79963056001759	Emx-Cre+;POMT2F/+	Emx-POMT2-Ctrl	Emx-POMT2	TBR1
13	JJ046	107.42767962604303	Emx-Cre+;POMT2F/+	Emx-POMT2-Ctrl	Emx-POMT2	TBR1
13	JJ047	177.08974200897626	Emx-Cre+;POMT2F/+	Emx-POMT2-Ctrl	Emx-POMT2	TBR1
13	JJ048	84.18613495959595	Emx-Cre+;POMT2F/+	Emx-POMT2-Ctrl	Emx-POMT2	TBR1
13	JJ049	108.30574193700615	Emx-Cre+;POMT2F/+	Emx-POMT2-Ctrl	Emx-POMT2	TBR1
13	JJ050	104.56420091073123	Emx-Cre+;POMT2F/+	Emx-POMT2-Ctrl	Emx-POMT2	TBR1
13	JJ051	78.67203440170938	Emx-Cre+;POMT2F/+	Emx-POMT2-Ctrl	Emx-POMT2	TBR1
13	JJ052	24.753986549320796	Emx-Cre+;POMT2F/+	Emx-POMT2-Ctrl	Emx-POMT2	TBR1
13	JJ061	140.2703836234324	WT	B4GAT1-Ctrl	B4GAT1	TBR1
13	JJ062	99.482921023935	WT	B4GAT1-Ctrl	B4GAT1	TBR1
13	JJ063	103.94156009024181	WT	B4GAT1-Ctrl	B4GAT1	TBR1
13	JJ064	71.66428285589446	WT	B4GAT1-Ctrl	B4GAT1	TBR1
13	JJ065	90.39619869458126	B4GAT1M155T/M155T;Thy1	B4GAT1-Mutant	B4GAT1	TBR1
13	JJ066	62.43162734822263	B4GAT1M155T/M155T;Thy1	B4GAT1-Mutant	B4GAT1	TBR1
13	JJ067	76.83782919495319	B4GAT1M155T/M155T;Thy1	B4GAT1-Mutant	B4GAT1	TBR1
13	JJ068	54.883206508681205	B4GAT1M155T/M155T;Thy1	B4GAT1-Mutant	B4GAT1	TBR1
13	JJ078	167.28840355844156	B4GAT1M155T/M155T	B4GAT1-Mutant	B4GAT1	TBR1
13	JJ079	80.1650416823842	B4GAT1M155T/M155T	B4GAT1-Mutant	B4GAT1	TBR1
13	JJ080	135.5625311652112	B4GAT1M155T/M155T	B4GAT1-Mutant	B4GAT1	TBR1
13	JJ081	178.45399601951536	B4GAT1M155T/M155T	B4GAT1-Mutant	B4GAT1	TBR1
13	JJ082	76.28889504910904	B4GAT1M155T/M155T;Thy1	B4GAT1-Mutant	B4GAT1	TBR1
13	JJ083	212.1887061611324	B4GAT1M155T/M155T;Thy1	B4GAT1-Mutant	B4GAT1	TBR1
13	JJ084	190.84539513647343	B4GAT1M155T/M155T;Thy1	B4GAT1-Mutant	B4GAT1	TBR1
13	JJ085	18.33978188172041	B4GAT1M155T/M155T;Thy1	B4GAT1-Mutant	B4GAT1	TBR1
13	JJ094	216.16636211637368	B4GAT1M155T/M155T	B4GAT1-Mutant	B4GAT1	TBR1
13	JJ095	87.46509101657881	B4GAT1M155T/M155T	B4GAT1-Mutant	B4GAT1	TBR1
13	JJ096	132.56153974879228	B4GAT1M155T/M155T	B4GAT1-Mutant	B4GAT1	TBR1
13	JJ097	153.60389474978322	B4GAT1M155T/M155T	B4GAT1-Mutant	B4GAT1	TBR1
13	JJ098	180.82501507056452	B4GAT1M155T/M155T;Thy1	B4GAT1-Mutant	B4GAT1	TBR1
13	JJ099	121.32544413812417	B4GAT1M155T/M155T;Thy1	B4GAT1-Mutant	B4GAT1	TBR1
13	JJ100	160.8813068813131	B4GAT1M155T/M155T;Thy1	B4GAT1-Mutant	B4GAT1	TBR1
13	JJ101	124.08851276779899	B4GAT1M155T/M155T;Thy1	B4GAT1-Mutant	B4GAT1	TBR1
13	JJ102	248.02270824754126	WT	B4GAT1-Ctrl	B4GAT1	TBR1
13	JJ103	240.99534916083533	WT	B4GAT1-Ctrl	B4GAT1	TBR1
13	JJ104	138.7038889116809	WT	B4GAT1-Ctrl	B4GAT1	TBR1
13	JJ105	388.2845667499071	WT	B4GAT1-Ctrl	B4GAT1	TBR1
13	JJ110	333.50422835805045	WT	B4GAT1-Ctrl	B4GAT1	TBR1
13	JJ111	202.5774802650271	WT	B4GAT1-Ctrl	B4GAT1	TBR1
13	JJ112	241.2558780763617	WT	B4GAT1-Ctrl	B4GAT1	TBR1
13	JJ113	221.09452939165206	WT	B4GAT1-Ctrl	B4GAT1	TBR1
13	JJ122	39.49193720043578	Emx-Cre+;DGF/-	Emx-DG-cKO	Emx-DG	TBR1
13	JJ123	116.02968682637243	Emx-Cre+;DGF/-	Emx-DG-cKO	Emx-DG	TBR1
13	JJ124	111.49646484905315	Emx-Cre+;DGF/-	Emx-DG-cKO	Emx-DG	TBR1
13	JJ125	163.61914415402023	Emx-Cre+;DGF/-	Emx-DG-cKO	Emx-DG	TBR1
13	JJ142	209.66414308003223	Emx-Cre+;DGF/+	Emx-DG-Ctrl	Emx-DG	TBR1
13	JJ143	375.34913893274205	Emx-Cre+;DGF/+	Emx-DG-Ctrl	Emx-DG	TBR1
13	JJ144	201.21684504333146	Emx-Cre+;DGF/+	Emx-DG-Ctrl	Emx-DG	TBR1
13	JJ145	55.3809669850289	Emx-Cre+;DGF/+	Emx-DG-Ctrl	Emx-DG	TBR1
13	JJ150	108.34291640930678	Emx-Cre+;DGF/-	Emx-DG-cKO	Emx-DG	TBR1
13	JJ151	336.89792359225345	Emx-Cre+;DGF/-	Emx-DG-cKO	Emx-DG	TBR1
13	JJ152	221.5510703104735	Emx-Cre+;DGF/-	Emx-DG-cKO	Emx-DG	TBR1
13	JJ153	238.80793378808247	Emx-Cre+;DGF/-	Emx-DG-cKO	Emx-DG	TBR1
13	JJ166	26.955156469126752	Emx-Cre+;POMT2F/F	Emx-POMT2-cKO	Emx-POMT2	TBR1
13	JJ167	55.23586460232067	Emx-Cre+;POMT2F/F	Emx-POMT2-cKO	Emx-POMT2	TBR1
13	JJ168	60.67559137550933	Emx-Cre+;POMT2F/F	Emx-POMT2-cKO	Emx-POMT2	TBR1
13	JJ169	66.3119940841624	Emx-Cre+;POMT2F/F	Emx-POMT2-cKO	Emx-POMT2	TBR1
13	JJ170	86.12311709938031	Emx-Cre+;POMT2F/+	Emx-POMT2-Ctrl	Emx-POMT2	TBR1
13	JJ171	74.82747741302069	Emx-Cre+;POMT2F/+	Emx-POMT2-Ctrl	Emx-POMT2	TBR1
13	JJ172	3.2892428796050885	Emx-Cre+;POMT2F/+	Emx-POMT2-Ctrl	Emx-POMT2	TBR1
13	JJ173	49.41501798946175	Emx-Cre+;POMT2F/+	Emx-POMT2-Ctrl	Emx-POMT2	TBR1
13	JJ194	118.12949282196416	Emx-Cre+;POMT2F/F	Emx-POMT2-cKO	Emx-POMT2	TBR1
13	JJ195	245.10576865776784	Emx-Cre+;POMT2F/F	Emx-POMT2-cKO	Emx-POMT2	TBR1
13	JJ196	245.71715047086454	Emx-Cre+;POMT2F/F	Emx-POMT2-cKO	Emx-POMT2	TBR1
13	JJ197	272.95764624740053	Emx-Cre+;POMT2F/F	Emx-POMT2-cKO	Emx-POMT2	TBR1
13	JJ202	46.23455626131662	Emx-Cre+;POMT2F/+	Emx-POMT2-Ctrl	Emx-POMT2	TBR1
13	JJ203	137.51904858374385	Emx-Cre+;POMT2F/+	Emx-POMT2-Ctrl	Emx-POMT2	TBR1
13	JJ204	180.32556842314122	Emx-Cre+;POMT2F/+	Emx-POMT2-Ctrl	Emx-POMT2	TBR1
13	JJ205	84.09004982456139	Emx-Cre+;POMT2F/+	Emx-POMT2-Ctrl	Emx-POMT2	TBR1
13	JJ210	255.1077508191936	Emx-Cre+;POMT2F/+	Emx-POMT2-Ctrl	Emx-POMT2	TBR1
13	JJ211	290.7025334869383	Emx-Cre+;POMT2F/+	Emx-POMT2-Ctrl	Emx-POMT2	TBR1
13	JJ212	168.29277365707674	Emx-Cre+;POMT2F/+	Emx-POMT2-Ctrl	Emx-POMT2	TBR1
13	JJ213	267.6193851908832	Emx-Cre+;POMT2F/+	Emx-POMT2-Ctrl	Emx-POMT2	TBR1
13	JJ214	300.8487143003342	DGdelta/-	ICD-Mutant	ICD	TBR1
13	JJ215	482.4798386595938	DGdelta/-	ICD-Mutant	ICD	TBR1
13	JJ216	257.2460533854228	DGdelta/-	ICD-Mutant	ICD	TBR1
13	JJ217	278.8981059761589	DGdelta/-	ICD-Mutant	ICD	TBR1
13	JJ222	237.1389451648381	WT	ICD-Ctrl	ICD	TBR1
13	JJ223	204.88138043412619	WT	ICD-Ctrl	ICD	TBR1
13	JJ224	242.14047760366103	WT	ICD-Ctrl	ICD	TBR1
[truncated: 13,901 more rows]
