# Supplementary material for: Inhibitory CCK+ basket synapse defects in mouse models of dystroglycanopathy
Source: eLife. 2024 Jan 5;12:RP87965. doi: 10.7554/eLife.87965 (PMC10942650; doi:10.7554/eLife.87965)
Supplement: Figure 3—figure supplement 2—source data 1. [file elife-87965-fig3-figsupp2-data1.csv]

Code	Genotype	Marker	density
JJ001	Emx-Cre+;DGF/-	NECAB1	0.8745354941161982
JJ002	Emx-Cre+;DGF/-	NECAB1	1.0059863372684166
JJ003	Emx-Cre+;DGF/-	NECAB1	0.6565025483240584
JJ004	Emx-Cre+;DGF/-	NECAB1	0.6549984753091047
JJ005	Emx-Cre+;DGF/-	NECAB1	0.6559202634175778
JJ006	Emx-Cre+;DGF/-	NECAB1	1.0303974611006559
JJ007	Emx-Cre+;DGF/-	NECAB1	1.0306136420855498
JJ008	Emx-Cre+;DGF/-	NECAB1	1.3957810680663658
JJ009	Emx-Cre+;DGF/-	NECAB1	0.670040194966807
JJ010	Emx-Cre+;DGF/-	NECAB1	0.36630519669856454
JJ011	Emx-Cre+;DGF/-	NECAB1	0.6035667778738455
JJ012	DGF/-	NECAB1	0.8982567082933796
JJ013	DGF/-	NECAB1	0.7587656400567556
JJ014	DGF/-	NECAB1	0.8114511993248726
JJ015	DGF/-	NECAB1	0.7436061029240079
JJ016	DGF/-	NECAB1	1.0390774773277005
JJ017	DGF/-	NECAB1	0.7034569987288533
JJ018	DGF/-	NECAB1	0.8712894866580168
JJ019	DGF/-	NECAB1	0.7969842117427653
JJ020	Emx-Cre+;DGF/+	NECAB1	1.237227446071439
JJ021	Emx-Cre+;DGF/+	NECAB1	0.9258316282600846
JJ022	Emx-Cre+;DGF/+	NECAB1	1.4022926747182867
JJ023	Emx-Cre+;DGF/+	NECAB1	1.1052931753304458
JJ024	Emx-Cre+;DGF/-	NECAB2	0.43559034470441926
JJ025	Emx-Cre+;DGF/-	NECAB2	0.5195961995249406
JJ026	Emx-Cre+;DGF/-	NECAB2	0.36346771461678146
JJ027	Emx-Cre+;DGF/-	NECAB2	0.35822880216886044
JJ028	Emx-Cre+;DGF/-	NECAB2	0.2239882450968973
JJ029	Emx-Cre+;DGF/-	NECAB2	0.2914258153730032
JJ030	Emx-Cre+;DGF/-	NECAB2	0.4412919852549638
JJ031	Emx-Cre+;DGF/-	NECAB2	0.5098599633192176
JJ032	Emx-Cre+;DGF/+	NECAB2	0.2972130333859401
JJ033	Emx-Cre+;DGF/+	NECAB2	0.5894228077155446
JJ034	Emx-Cre+;DGF/+	NECAB2	0.28933155008654626
JJ035	Emx-Cre+;DGF/+	NECAB2	0.42976710204461704
JJ036	Emx-Cre+;DGF/-	NECAB2	0.21886371794011306
JJ037	Emx-Cre+;DGF/-	NECAB2	0.29245623757974915
JJ038	Emx-Cre+;DGF/-	NECAB2	0.37064162513009524
JJ039	Emx-Cre+;DGF/-	NECAB2	0.28578838656022953
JJ040	DGF/-	NECAB2	0.37115832574933155
JJ041	DGF/-	NECAB2	0.21996457103975786
JJ042	DGF/-	NECAB2	0.2952556840409874
JJ043	DGF/-	NECAB2	0.2981003554846739
JJ044	DGF/-	NECAB2	0.34671731513206117
JJ045	DGF/-	NECAB2	0.3527988947516225
JJ046	DGF/-	NECAB2	0.49947412509971645
JJ047	DGF/-	NECAB2	0.43423635195145815
JJ048	Emx-Cre+;DGF/-	PV	2.310293250739108
JJ049	Emx-Cre+;DGF/-	PV	2.0066110115094573
JJ050	Emx-Cre+;DGF/-	PV	1.6798188849820377
JJ051	Emx-Cre+;DGF/-	PV	1.8353756169615136
JJ052	DGF/+	PV	2.208543501182639
JJ053	DGF/+	PV	2.1285325382897313
JJ054	DGF/+	PV	2.0780747528018755
JJ055	DGF/+	PV	2.0186439167817527
JJ056	Emx-Cre+;DGF/-	PV	2.2201802929635326
JJ057	Emx-Cre+;DGF/-	PV	1.8149712440493522
JJ058	Emx-Cre+;DGF/-	PV	2.5784037323499054
JJ059	Emx-Cre+;DGF/-	PV	2.4758380711870966
JJ060	Emx-Cre+;DGF/+	PV	2.053156995029839
JJ061	Emx-Cre+;DGF/+	PV	1.7771261648506662
JJ062	Emx-Cre+;DGF/+	PV	2.771768227658454
JJ063	Emx-Cre+;DGF/+	PV	2.720669571100762
JJ064	Emx-Cre+;DGF/-	PV	1.9545403973430278
JJ065	Emx-Cre+;DGF/-	PV	2.071689329468153
JJ066	Emx-Cre+;DGF/-	PV	1.9018218692778934
JJ067	Emx-Cre+;DGF/-	PV	1.680890901410633
JJ068	Emx-Cre+;DGF/+	PV	1.9420115355485212
JJ069	Emx-Cre+;DGF/+	PV	2.1668035239697034
JJ070	Emx-Cre+;DGF/+	PV	2.052376652163205
JJ071	Emx-Cre+;DGF/+	PV	1.7787066579213588
