# Supplementary material for: Inhibitory CCK+ basket synapse defects in mouse models of dystroglycanopathy
Source: eLife. 2024 Jan 5;12:RP87965. doi: 10.7554/eLife.87965 (PMC10942650; doi:10.7554/eLife.87965)
Supplement: Figure 3—figure supplement 3—source data 1. [file elife-87965-fig3-figsupp3-data1.csv]

um	Region	Image	Intensity	Genotype	Condition	Experiment
1	SO	JJ021	-27.908042000000005	WT	B4GAT1-Ctrl	B4GAT1
1	SO	JJ022	-26.603127666666676	WT	B4GAT1-Ctrl	B4GAT1
1	SO	JJ023	-15.087213333333324	WT	B4GAT1-Ctrl	B4GAT1
1	SO	JJ024	-26.188471333333343	WT	B4GAT1-Ctrl	B4GAT1
1	SO	JJ025	-6.3808570000000016	B4GAT1M155T/M155T	B4GAT1-Mutant	B4GAT1
1	SO	JJ026	-4.079421333333333	B4GAT1M155T/M155T	B4GAT1-Mutant	B4GAT1
1	SO	JJ027	-20.171256666666668	B4GAT1M155T/M155T	B4GAT1-Mutant	B4GAT1
1	SO	JJ028	0.016835999999997853	B4GAT1M155T/M155T	B4GAT1-Mutant	B4GAT1
1	SO	JJ049	58.68352166666666	Emx-Cre+;POMT2F/F	Emx-POMT2-cKO	Emx-POMT2
1	SO	JJ050	-3.571929000000002	Emx-Cre+;POMT2F/F	Emx-POMT2-cKO	Emx-POMT2
1	SO	JJ051	35.673739333333316	Emx-Cre+;POMT2F/F	Emx-POMT2-cKO	Emx-POMT2
1	SO	JJ052	11.24196066666668	Emx-Cre+;POMT2F/F	Emx-POMT2-cKO	Emx-POMT2
1	SO	JJ053	-36.475938000000006	Emx-Cre+;POMT2F/+	Emx-POMT2-Ctrl	Emx-POMT2
1	SO	JJ054	40.912933999999986	Emx-Cre+;POMT2F/+	Emx-POMT2-Ctrl	Emx-POMT2
1	SO	JJ055	147.10746	Emx-Cre+;POMT2F/+	Emx-POMT2-Ctrl	Emx-POMT2
1	SO	JJ056	58.967690000000026	Emx-Cre+;POMT2F/+	Emx-POMT2-Ctrl	Emx-POMT2
1	SO	JJ057	-14.298346333333333	Emx-Cre+;POMT2F/+	Emx-POMT2-Ctrl	Emx-POMT2
1	SO	JJ058	53.03676633333334	Emx-Cre+;POMT2F/+	Emx-POMT2-Ctrl	Emx-POMT2
1	SO	JJ059	17.369827000000015	Emx-Cre+;POMT2F/+	Emx-POMT2-Ctrl	Emx-POMT2
1	SO	JJ060	-2.990107666666679	Emx-Cre+;POMT2F/+	Emx-POMT2-Ctrl	Emx-POMT2
1	SO	JJ069	-34.50873633333334	B4GAT1M155T/M155T	B4GAT1-Mutant	B4GAT1
1	SO	JJ070	-4.8823236666666645	B4GAT1M155T/M155T	B4GAT1-Mutant	B4GAT1
1	SO	JJ071	-33.90276533333333	B4GAT1M155T/M155T	B4GAT1-Mutant	B4GAT1
1	SO	JJ072	-22.488201666666665	B4GAT1M155T/M155T	B4GAT1-Mutant	B4GAT1
1	SO	JJ073	-16.702743666666667	B4GAT1M155T/M155T	B4GAT1-Mutant	B4GAT1
1	SO	JJ074	-13.899213999999992	B4GAT1M155T/M155T	B4GAT1-Mutant	B4GAT1
1	SO	JJ075	21.272826999999996	B4GAT1M155T/M155T	B4GAT1-Mutant	B4GAT1
1	SO	JJ076	9.619577000000012	B4GAT1M155T/M155T	B4GAT1-Mutant	B4GAT1
1	SO	JJ081	19.040585000000004	B4GAT1M155T/M155T	B4GAT1-Mutant	B4GAT1
1	SO	JJ082	-8.363652000000007	B4GAT1M155T/M155T	B4GAT1-Mutant	B4GAT1
1	SO	JJ083	9.552763499999998	B4GAT1M155T/M155T	B4GAT1-Mutant	B4GAT1
1	SO	JJ084	20.007404333333323	B4GAT1M155T/M155T	B4GAT1-Mutant	B4GAT1
1	SO	JJ085	21.492093666666666	B4GAT1M155T/M155T	B4GAT1-Mutant	B4GAT1
1	SO	JJ086	9.725601333333335	B4GAT1M155T/M155T	B4GAT1-Mutant	B4GAT1
1	SO	JJ087	48.06346933333334	B4GAT1M155T/M155T	B4GAT1-Mutant	B4GAT1
1	SO	JJ088	41.26671533333334	B4GAT1M155T/M155T	B4GAT1-Mutant	B4GAT1
1	SO	JJ097	-0.8020026666666619	WT	B4GAT1-Ctrl	B4GAT1
1	SO	JJ098	1.5366013333333417	WT	B4GAT1-Ctrl	B4GAT1
1	SO	JJ099	-14.955594999999997	WT	B4GAT1-Ctrl	B4GAT1
1	SO	JJ100	9.062614999999994	WT	B4GAT1-Ctrl	B4GAT1
1	SO	JJ105	25.546938333333344	WT	B4GAT1-Ctrl	B4GAT1
1	SO	JJ106	-10.853789000000011	WT	B4GAT1-Ctrl	B4GAT1
1	SO	JJ107	3.948551333333332	WT	B4GAT1-Ctrl	B4GAT1
1	SO	JJ108	9.316223666666668	WT	B4GAT1-Ctrl	B4GAT1
1	SO	JJ109	29.106719	Emx-Cre+;DGF/-	Emx-DG-cKO	Emx-DG
1	SO	JJ110	28.453661999999998	Emx-Cre+;DGF/-	Emx-DG-cKO	Emx-DG
1	SO	JJ114	12.581802333333334	Emx-Cre+;DGF/-	Emx-DG-cKO	Emx-DG
1	SO	JJ115	18.161990333333335	Emx-Cre+;DGF/-	Emx-DG-cKO	Emx-DG
1	SO	JJ116	20.379358666666672	Emx-Cre+;DGF/-	Emx-DG-cKO	Emx-DG
1	SO	JJ117	14.65271766666667	Emx-Cre+;DGF/-	Emx-DG-cKO	Emx-DG
1	SO	JJ130	15.418495666666672	Emx-Cre+;DGF/+	Emx-DG-Ctrl	Emx-DG
1	SO	JJ131	40.29192666666666	Emx-Cre+;DGF/+	Emx-DG-Ctrl	Emx-DG
1	SO	JJ132	17.201395666666667	Emx-Cre+;DGF/+	Emx-DG-Ctrl	Emx-DG
1	SO	JJ133	62.487755666666665	Emx-Cre+;DGF/+	Emx-DG-Ctrl	Emx-DG
1	SO	JJ146	1.696634999999996	Emx-Cre+;POMT2F/F	Emx-POMT2-cKO	Emx-POMT2
1	SO	JJ147	-1.1132026666666708	Emx-Cre+;POMT2F/F	Emx-POMT2-cKO	Emx-POMT2
1	SO	JJ148	0.27610433333333145	Emx-Cre+;POMT2F/F	Emx-POMT2-cKO	Emx-POMT2
1	SO	JJ149	-1.1555950000000053	Emx-Cre+;POMT2F/F	Emx-POMT2-cKO	Emx-POMT2
1	SO	JJ158	4.801949666666668	Emx-Cre+;POMT2F/+	Emx-POMT2-Ctrl	Emx-POMT2
1	SO	JJ159	-3.201167666666668	Emx-Cre+;POMT2F/+	Emx-POMT2-Ctrl	Emx-POMT2
1	SO	JJ160	-5.855182666666669	Emx-Cre+;POMT2F/+	Emx-POMT2-Ctrl	Emx-POMT2
1	SO	JJ161	3.4547773333333303	Emx-Cre+;POMT2F/+	Emx-POMT2-Ctrl	Emx-POMT2
1	SO	JJ190	26.281381000000007	Emx-Cre+;DGF/-	Emx-DG-cKO	Emx-DG
1	SO	JJ191	77.14214700000001	Emx-Cre+;DGF/-	Emx-DG-cKO	Emx-DG
1	SO	JJ192	37.73781833333334	Emx-Cre+;DGF/-	Emx-DG-cKO	Emx-DG
1	SO	JJ193	44.87080566666666	Emx-Cre+;DGF/+	Emx-DG-Ctrl	Emx-DG
1	SO	JJ194	33.61839799999999	Emx-Cre+;DGF/+	Emx-DG-Ctrl	Emx-DG
1	SO	JJ195	36.338459	Emx-Cre+;DGF/+	Emx-DG-Ctrl	Emx-DG
1	SO	JJ196	124.142014	Emx-Cre+;DGF/+	Emx-DG-Ctrl	Emx-DG
1	SO	JJ201	0.40917833333333437	Emx-Cre+;DGF/-	Emx-DG-cKO	Emx-DG
1	SO	JJ202	-3.3525479999999988	Emx-Cre+;DGF/-	Emx-DG-cKO	Emx-DG
1	SO	JJ203	-0.7678969999999955	Emx-Cre+;DGF/-	Emx-DG-cKO	Emx-DG
1	SO	JJ204	13.179951333333335	Emx-Cre+;DGF/-	Emx-DG-cKO	Emx-DG
1	SO	JJ205	6.481943333333338	Emx-Cre+;DGF/+	Emx-DG-Ctrl	Emx-DG
1	SO	JJ206	10.464356000000004	Emx-Cre+;DGF/+	Emx-DG-Ctrl	Emx-DG
1	SO	JJ207	8.655561666666665	Emx-Cre+;DGF/+	Emx-DG-Ctrl	Emx-DG
1	SO	JJ208	-17.98140966666666	Emx-Cre+;DGF/+	Emx-DG-Ctrl	Emx-DG
1	SO	JJ209	8.76920033333333	Emx-Cre+;DGF/+	Emx-DG-Ctrl	Emx-DG
1	SO	JJ210	6.707570666666669	Emx-Cre+;DGF/+	Emx-DG-Ctrl	Emx-DG
1	SO	JJ211	-1.146404333333327	Emx-Cre+;DGF/+	Emx-DG-Ctrl	Emx-DG
1	SO	JJ212	2.822003	Emx-Cre+;DGF/+	Emx-DG-Ctrl	Emx-DG
1	SO	JJ213	2.6134163333333285	Emx-Cre+;DGF/-	Emx-DG-cKO	Emx-DG
1	SO	JJ214	2.6567830000000043	Emx-Cre+;DGF/-	Emx-DG-cKO	Emx-DG
1	SO	JJ215	12.295433000000003	Emx-Cre+;DGF/+	Emx-DG-Ctrl	Emx-DG
1	SO	JJ216	21.985394999999997	Emx-Cre+;DGF/+	Emx-DG-Ctrl	Emx-DG
1	SO	JJ217	8.22830633333333	Emx-Cre+;DGF/+	Emx-DG-Ctrl	Emx-DG
1	SO	JJ218	13.905062666666666	Emx-Cre+;DGF/+	Emx-DG-Ctrl	Emx-DG
1	SO	JJ219	1.6026096666666707	Emx-Cre+;DGF/+	Emx-DG-Ctrl	Emx-DG
1	SO	JJ220	-7.610138666666667	Emx-Cre+;DGF/+	Emx-DG-Ctrl	Emx-DG
1	SO	JJ221	-3.7764323333333323	Emx-Cre+;DGF/+	Emx-DG-Ctrl	Emx-DG
1	SO	JJ222	3.905979666666667	Emx-Cre+;DGF/+	Emx-DG-Ctrl	Emx-DG
1	SO	JJ223	49.015577	Emx-Cre+;POMT2F/F	Emx-POMT2-cKO	Emx-POMT2
1	SO	JJ224	4.67854499999999	Emx-Cre+;POMT2F/F	Emx-POMT2-cKO	Emx-POMT2
1	SO	JJ225	2.800326333333331	Emx-Cre+;POMT2F/F	Emx-POMT2-cKO	Emx-POMT2
1	SO	JJ226	22.156359666666674	Emx-Cre+;POMT2F/F	Emx-POMT2-cKO	Emx-POMT2
1	SO	JJ231	26.413781	Emx-Cre+;POMT2F/+	Emx-POMT2-Ctrl	Emx-POMT2
1	SO	JJ232	1.5679523333333378	Emx-Cre+;POMT2F/+	Emx-POMT2-Ctrl	Emx-POMT2
1	SO	JJ233	5.906463333333335	Emx-Cre+;POMT2F/+	Emx-POMT2-Ctrl	Emx-POMT2
1	SO	JJ234	3.148436000000004	Emx-Cre+;POMT2F/+	Emx-POMT2-Ctrl	Emx-POMT2
1	SO	JJ239	149.218219	Emx-Cre+;POMT2F/+	Emx-POMT2-Ctrl	Emx-POMT2
1	SO	JJ240	108.47177066666667	Emx-Cre+;POMT2F/+	Emx-POMT2-Ctrl	Emx-POMT2
1	SO	JJ241	4.363691333333331	Emx-Cre+;POMT2F/+	Emx-POMT2-Ctrl	Emx-POMT2
1	SO	JJ242	39.68683433333334	Emx-Cre+;POMT2F/+	Emx-POMT2-Ctrl	Emx-POMT2
1	SO	JJ267	-7.062798333333338	FKRPMut	FKRP-Mutant	FKRP
1	SO	JJ268	-8.398991	FKRPMut	FKRP-Mutant	FKRP
1	SO	JJ269	-1.1360400000000037	FKRPMut	FKRP-Mutant	FKRP
1	SO	JJ270	-12.776931999999997	FKRPMut	FKRP-Mutant	FKRP
1	SO	JJ271	3.190665333333333	WT	FKRP-Ctrl	FKRP
1	SO	JJ272	1.179228999999997	WT	FKRP-Ctrl	FKRP
1	SO	JJ273	17.00968700000001	WT	FKRP-Ctrl	FKRP
1	SO	JJ274	2.4161533333333316	WT	FKRP-Ctrl	FKRP
1	SO	JJ275	-6.434676666666671	WT	FKRP-Ctrl	FKRP
1	SO	JJ276	1.7938706666666728	WT	FKRP-Ctrl	FKRP
1	SO	JJ277	-2.106296333333333	WT	FKRP-Ctrl	FKRP
1	SO	JJ278	3.971334666666673	WT	FKRP-Ctrl	FKRP
1	SO	JJ279	18.868757666666664	FKRPMut	FKRP-Mutant	FKRP
1	SO	JJ280	18.518072333333336	FKRPMut	FKRP-Mutant	FKRP
1	SO	JJ281	2.334789333333333	FKRPMut	FKRP-Mutant	FKRP
1	SO	JJ282	15.461780666666664	FKRPMut	FKRP-Mutant	FKRP
1	SO	JJ283	18.40071933333333	WT	FKRP-Ctrl	FKRP
1	SO	JJ284	16.301139000000003	WT	FKRP-Ctrl	FKRP
1	SO	JJ285	-1.4653079999999978	WT	FKRP-Ctrl	FKRP
1	SO	JJ286	37.09442033333334	WT	FKRP-Ctrl	FKRP
1	SO	JJ287	12.62012	DGdelta/-	ICD-Mutant	ICD
1	SO	JJ288	24.12810466666666	DGdelta/-	ICD-Mutant	ICD
1	SO	JJ289	44.27956666666667	DGdelta/-	ICD-Mutant	ICD
1	SO	JJ290	33.38386933333334	DGdelta/-	ICD-Mutant	ICD
1	SO	JJ295	24.036709666666667	WT	ICD-Ctrl	ICD
1	SO	JJ296	21.179935666666665	WT	ICD-Ctrl	ICD
1	SO	JJ297	25.91290433333334	WT	ICD-Ctrl	ICD
1	SO	JJ298	30.660653333333332	WT	ICD-Ctrl	ICD
1	SO	JJ327	13.947756666666669	DGdelta/-	ICD-Mutant	ICD
1	SO	JJ328	12.461346	DGdelta/-	ICD-Mutant	ICD
1	SO	JJ329	23.509715666666665	DGdelta/-	ICD-Mutant	ICD
1	SO	JJ330	1.1161006666666633	DGdelta/-	ICD-Mutant	ICD
1	SO	JJ335	39.61699866666668	DGdelta/-	ICD-Mutant	ICD
1	SO	JJ336	48.84087466666667	DGdelta/-	ICD-Mutant	ICD
1	SO	JJ337	43.08299066666667	DGdelta/-	ICD-Mutant	ICD
1	SO	JJ338	25.60972533333334	DGdelta/-	ICD-Mutant	ICD
1	SO	JJ343	11.88085966666666	WT	ICD-Ctrl	ICD
1	SO	JJ344	15.084708999999995	WT	ICD-Ctrl	ICD
1	SO	JJ345	18.996458333333333	WT	ICD-Ctrl	ICD
1	SO	JJ346	-3.015181000000003	WT	ICD-Ctrl	ICD
1	SO	JJ351	46.463312	WT	ICD-Ctrl	ICD
1	SO	JJ352	35.232088	WT	ICD-Ctrl	ICD
1	SO	JJ353	3.908098333333342	WT	ICD-Ctrl	ICD
1	SO	JJ354	12.354974333333331	WT	ICD-Ctrl	ICD
1	SO	JJ359	3.8196656999999967	FKRPMut	FKRP-Mutant	FKRP
1	SO	JJ360	13.379707333333329	FKRPMut	FKRP-Mutant	FKRP
1	SO	JJ361	45.47759799999999	FKRPMut	FKRP-Mutant	FKRP
1	SO	JJ366	24.73008466666666	WT	FKRP-Ctrl	FKRP
1	SO	JJ367	49.051902	WT	FKRP-Ctrl	FKRP
1	SO	JJ368	21.320248500000005	WT	FKRP-Ctrl	FKRP
2	SO	JJ021	-23.39742533333334	WT	B4GAT1-Ctrl	B4GAT1
2	SO	JJ022	-25.836861	WT	B4GAT1-Ctrl	B4GAT1
2	SO	JJ023	-10.29468	WT	B4GAT1-Ctrl	B4GAT1
2	SO	JJ024	-24.751338000000004	WT	B4GAT1-Ctrl	B4GAT1
2	SO	JJ025	-1.8074070000000073	B4GAT1M155T/M155T	B4GAT1-Mutant	B4GAT1
2	SO	JJ026	-11.09317133333333	B4GAT1M155T/M155T	B4GAT1-Mutant	B4GAT1
2	SO	JJ027	-16.90224	B4GAT1M155T/M155T	B4GAT1-Mutant	B4GAT1
2	SO	JJ028	-6.779847333333332	B4GAT1M155T/M155T	B4GAT1-Mutant	B4GAT1
2	SO	JJ049	46.95073833333334	Emx-Cre+;POMT2F/F	Emx-POMT2-cKO	Emx-POMT2
2	SO	JJ050	-1.4431956666666679	Emx-Cre+;POMT2F/F	Emx-POMT2-cKO	Emx-POMT2
2	SO	JJ051	51.789705999999995	Emx-Cre+;POMT2F/F	Emx-POMT2-cKO	Emx-POMT2
2	SO	JJ052	29.19751066666667	Emx-Cre+;POMT2F/F	Emx-POMT2-cKO	Emx-POMT2
2	SO	JJ053	-20.572571333333332	Emx-Cre+;POMT2F/+	Emx-POMT2-Ctrl	Emx-POMT2
2	SO	JJ054	40.914334	Emx-Cre+;POMT2F/+	Emx-POMT2-Ctrl	Emx-POMT2
2	SO	JJ055	189.95614333333333	Emx-Cre+;POMT2F/+	Emx-POMT2-Ctrl	Emx-POMT2
2	SO	JJ056	67.01520666666666	Emx-Cre+;POMT2F/+	Emx-POMT2-Ctrl	Emx-POMT2
2	SO	JJ057	-15.008929666666669	Emx-Cre+;POMT2F/+	Emx-POMT2-Ctrl	Emx-POMT2
2	SO	JJ058	57.40469966666668	Emx-Cre+;POMT2F/+	Emx-POMT2-Ctrl	Emx-POMT2
2	SO	JJ059	17.458893666666683	Emx-Cre+;POMT2F/+	Emx-POMT2-Ctrl	Emx-POMT2
2	SO	JJ060	2.251642333333327	Emx-Cre+;POMT2F/+	Emx-POMT2-Ctrl	Emx-POMT2
2	SO	JJ069	-27.208353	B4GAT1M155T/M155T	B4GAT1-Mutant	B4GAT1
2	SO	JJ070	6.077159666666669	B4GAT1M155T/M155T	B4GAT1-Mutant	B4GAT1
2	SO	JJ071	-34.27254866666666	B4GAT1M155T/M155T	B4GAT1-Mutant	B4GAT1
2	SO	JJ072	-24.703501666666668	B4GAT1M155T/M155T	B4GAT1-Mutant	B4GAT1
2	SO	JJ073	-15.120543666666672	B4GAT1M155T/M155T	B4GAT1-Mutant	B4GAT1
2	SO	JJ074	-21.662563999999993	B4GAT1M155T/M155T	B4GAT1-Mutant	B4GAT1
2	SO	JJ075	26.537227	B4GAT1M155T/M155T	B4GAT1-Mutant	B4GAT1
2	SO	JJ076	6.501643666666666	B4GAT1M155T/M155T	B4GAT1-Mutant	B4GAT1
2	SO	JJ081	11.091151666666667	B4GAT1M155T/M155T	B4GAT1-Mutant	B4GAT1
2	SO	JJ082	-1.8438853333333374	B4GAT1M155T/M155T	B4GAT1-Mutant	B4GAT1
2	SO	JJ083	3.6734134999999952	B4GAT1M155T/M155T	B4GAT1-Mutant	B4GAT1
2	SO	JJ084	13.955970999999996	B4GAT1M155T/M155T	B4GAT1-Mutant	B4GAT1
2	SO	JJ085	9.153343666666663	B4GAT1M155T/M155T	B4GAT1-Mutant	B4GAT1
2	SO	JJ086	-7.539865333333324	B4GAT1M155T/M155T	B4GAT1-Mutant	B4GAT1
2	SO	JJ087	52.80400266666667	B4GAT1M155T/M155T	B4GAT1-Mutant	B4GAT1
2	SO	JJ088	24.883348666666667	B4GAT1M155T/M155T	B4GAT1-Mutant	B4GAT1
2	SO	JJ097	8.497447333333346	WT	B4GAT1-Ctrl	B4GAT1
2	SO	JJ098	-7.083765333333342	WT	B4GAT1-Ctrl	B4GAT1
2	SO	JJ099	24.26752166666668	WT	B4GAT1-Ctrl	B4GAT1
2	SO	JJ100	10.851231666666669	WT	B4GAT1-Ctrl	B4GAT1
2	SO	JJ105	17.942205	WT	B4GAT1-Ctrl	B4GAT1
2	SO	JJ106	3.273744333333326	WT	B4GAT1-Ctrl	B4GAT1
2	SO	JJ107	9.687451333333334	WT	B4GAT1-Ctrl	B4GAT1
2	SO	JJ108	4.994390333333333	WT	B4GAT1-Ctrl	B4GAT1
2	SO	JJ109	39.462168999999996	Emx-Cre+;DGF/-	Emx-DG-cKO	Emx-DG
2	SO	JJ110	33.099578666666666	Emx-Cre+;DGF/-	Emx-DG-cKO	Emx-DG
2	SO	JJ114	15.364252333333335	Emx-Cre+;DGF/-	Emx-DG-cKO	Emx-DG
2	SO	JJ115	12.997940333333327	Emx-Cre+;DGF/-	Emx-DG-cKO	Emx-DG
2	SO	JJ116	16.345175333333334	Emx-Cre+;DGF/-	Emx-DG-cKO	Emx-DG
2	SO	JJ117	11.062650999999997	Emx-Cre+;DGF/-	Emx-DG-cKO	Emx-DG
2	SO	JJ130	23.542212333333328	Emx-Cre+;DGF/+	Emx-DG-Ctrl	Emx-DG
2	SO	JJ131	51.548276666666666	Emx-Cre+;DGF/+	Emx-DG-Ctrl	Emx-DG
2	SO	JJ132	18.943045666666663	Emx-Cre+;DGF/+	Emx-DG-Ctrl	Emx-DG
2	SO	JJ133	83.519439	Emx-Cre+;DGF/+	Emx-DG-Ctrl	Emx-DG
2	SO	JJ146	5.255068333333331	Emx-Cre+;POMT2F/F	Emx-POMT2-cKO	Emx-POMT2
2	SO	JJ147	0.6967806666666642	Emx-Cre+;POMT2F/F	Emx-POMT2-cKO	Emx-POMT2
2	SO	JJ148	2.5151043333333356	Emx-Cre+;POMT2F/F	Emx-POMT2-cKO	Emx-POMT2
2	SO	JJ149	-1.6891616666666682	Emx-Cre+;POMT2F/F	Emx-POMT2-cKO	Emx-POMT2
2	SO	JJ158	9.862883000000005	Emx-Cre+;POMT2F/+	Emx-POMT2-Ctrl	Emx-POMT2
2	SO	JJ159	-4.049867666666667	Emx-Cre+;POMT2F/+	Emx-POMT2-Ctrl	Emx-POMT2
2	SO	JJ160	-0.5027326666666644	Emx-Cre+;POMT2F/+	Emx-POMT2-Ctrl	Emx-POMT2
2	SO	JJ161	2.297077333333334	Emx-Cre+;POMT2F/+	Emx-POMT2-Ctrl	Emx-POMT2
2	SO	JJ190	24.876914333333335	Emx-Cre+;DGF/-	Emx-DG-cKO	Emx-DG
2	SO	JJ191	52.75698033333333	Emx-Cre+;DGF/-	Emx-DG-cKO	Emx-DG
2	SO	JJ192	40.133301666666675	Emx-Cre+;DGF/-	Emx-DG-cKO	Emx-DG
2	SO	JJ193	52.274539	Emx-Cre+;DGF/+	Emx-DG-Ctrl	Emx-DG
2	SO	JJ194	40.56018133333334	Emx-Cre+;DGF/+	Emx-DG-Ctrl	Emx-DG
2	SO	JJ195	39.95904233333333	Emx-Cre+;DGF/+	Emx-DG-Ctrl	Emx-DG
2	SO	JJ196	142.99548066666668	Emx-Cre+;DGF/+	Emx-DG-Ctrl	Emx-DG
2	SO	JJ201	-1.8491216666666663	Emx-Cre+;DGF/-	Emx-DG-cKO	Emx-DG
2	SO	JJ202	-2.4355646666666737	Emx-Cre+;DGF/-	Emx-DG-cKO	Emx-DG
2	SO	JJ203	4.00216966666667	Emx-Cre+;DGF/-	Emx-DG-cKO	Emx-DG
2	SO	JJ204	17.019117999999995	Emx-Cre+;DGF/-	Emx-DG-cKO	Emx-DG
2	SO	JJ205	7.523993333333337	Emx-Cre+;DGF/+	Emx-DG-Ctrl	Emx-DG
2	SO	JJ206	10.875072666666673	Emx-Cre+;DGF/+	Emx-DG-Ctrl	Emx-DG
2	SO	JJ207	7.2353283333333325	Emx-Cre+;DGF/+	Emx-DG-Ctrl	Emx-DG
2	SO	JJ208	-16.700476333333334	Emx-Cre+;DGF/+	Emx-DG-Ctrl	Emx-DG
2	SO	JJ209	10.176450333333326	Emx-Cre+;DGF/+	Emx-DG-Ctrl	Emx-DG
2	SO	JJ210	9.18238733333333	Emx-Cre+;DGF/+	Emx-DG-Ctrl	Emx-DG
2	SO	JJ211	-3.9198543333333333	Emx-Cre+;DGF/+	Emx-DG-Ctrl	Emx-DG
2	SO	JJ212	2.952269666666671	Emx-Cre+;DGF/+	Emx-DG-Ctrl	Emx-DG
2	SO	JJ213	2.2302496666666607	Emx-Cre+;DGF/-	Emx-DG-cKO	Emx-DG
2	SO	JJ214	1.1082830000000026	Emx-Cre+;DGF/-	Emx-DG-cKO	Emx-DG
2	SO	JJ215	11.893383000000005	Emx-Cre+;DGF/+	Emx-DG-Ctrl	Emx-DG
2	SO	JJ216	23.497144999999993	Emx-Cre+;DGF/+	Emx-DG-Ctrl	Emx-DG
2	SO	JJ217	9.0670063333333335	Emx-Cre+;DGF/+	Emx-DG-Ctrl	Emx-DG
2	SO	JJ218	12.118795999999998	Emx-Cre+;DGF/+	Emx-DG-Ctrl	Emx-DG
2	SO	JJ219	1.7297263333333366	Emx-Cre+;DGF/+	Emx-DG-Ctrl	Emx-DG
2	SO	JJ220	-7.427505333333333	Emx-Cre+;DGF/+	Emx-DG-Ctrl	Emx-DG
2	SO	JJ221	-0.7580156666666701	Emx-Cre+;DGF/+	Emx-DG-Ctrl	Emx-DG
2	SO	JJ222	4.116912999999997	Emx-Cre+;DGF/+	Emx-DG-Ctrl	Emx-DG
2	SO	JJ223	33.34979366666667	Emx-Cre+;POMT2F/F	Emx-POMT2-cKO	Emx-POMT2
2	SO	JJ224	6.955244999999991	Emx-Cre+;POMT2F/F	Emx-POMT2-cKO	Emx-POMT2
2	SO	JJ225	-1.7630903333333332	Emx-Cre+;POMT2F/F	Emx-POMT2-cKO	Emx-POMT2
2	SO	JJ226	18.326126333333324	Emx-Cre+;POMT2F/F	Emx-POMT2-cKO	Emx-POMT2
2	SO	JJ231	29.88491433333333	Emx-Cre+;POMT2F/+	Emx-POMT2-Ctrl	Emx-POMT2
2	SO	JJ232	5.019969000000008	Emx-Cre+;POMT2F/+	Emx-POMT2-Ctrl	Emx-POMT2
2	SO	JJ233	14.431629999999993	Emx-Cre+;POMT2F/+	Emx-POMT2-Ctrl	Emx-POMT2
2	SO	JJ234	2.2538193333333396	Emx-Cre+;POMT2F/+	Emx-POMT2-Ctrl	Emx-POMT2
2	SO	JJ239	109.38881900000003	Emx-Cre+;POMT2F/+	Emx-POMT2-Ctrl	Emx-POMT2
2	SO	JJ240	109.62433733333332	Emx-Cre+;POMT2F/+	Emx-POMT2-Ctrl	Emx-POMT2
2	SO	JJ241	0.29492466666666434	Emx-Cre+;POMT2F/+	Emx-POMT2-Ctrl	Emx-POMT2
2	SO	JJ242	19.850284333333338	Emx-Cre+;POMT2F/+	Emx-POMT2-Ctrl	Emx-POMT2
2	SO	JJ267	-10.542598333333336	FKRPMut	FKRP-Mutant	FKRP
2	SO	JJ268	-8.113540999999998	FKRPMut	FKRP-Mutant	FKRP
2	SO	JJ269	5.557326666666664	FKRPMut	FKRP-Mutant	FKRP
2	SO	JJ270	-14.288115333333328	FKRPMut	FKRP-Mutant	FKRP
2	SO	JJ271	2.7184986666666617	WT	FKRP-Ctrl	FKRP
2	SO	JJ272	3.0063623333333283	WT	FKRP-Ctrl	FKRP
2	SO	JJ273	18.098337	WT	FKRP-Ctrl	FKRP
2	SO	JJ274	2.482069999999998	WT	FKRP-Ctrl	FKRP
2	SO	JJ275	-5.7120433333333365	WT	FKRP-Ctrl	FKRP
2	SO	JJ276	3.6555539999999858	WT	FKRP-Ctrl	FKRP
2	SO	JJ277	-3.401312999999997	WT	FKRP-Ctrl	FKRP
2	SO	JJ278	2.975768000000007	WT	FKRP-Ctrl	FKRP
2	SO	JJ279	17.24510766666666	FKRPMut	FKRP-Mutant	FKRP
2	SO	JJ280	18.974355666666668	FKRPMut	FKRP-Mutant	FKRP
2	SO	JJ281	7.086172666666665	FKRPMut	FKRP-Mutant	FKRP
2	SO	JJ282	14.847580666666667	FKRPMut	FKRP-Mutant	FKRP
2	SO	JJ283	13.674702666666661	WT	FKRP-Ctrl	FKRP
2	SO	JJ284	16.484738999999994	WT	FKRP-Ctrl	FKRP
2	SO	JJ285	1.1078419999999956	WT	FKRP-Ctrl	FKRP
2	SO	JJ286	35.641253666666664	WT	FKRP-Ctrl	FKRP
2	SO	JJ287	13.022786666666676	DGdelta/-	ICD-Mutant	ICD
2	SO	JJ288	20.513287999999992	DGdelta/-	ICD-Mutant	ICD
2	SO	JJ289	37.73988333333333	DGdelta/-	ICD-Mutant	ICD
2	SO	JJ290	40.37653600000001	DGdelta/-	ICD-Mutant	ICD
2	SO	JJ295	21.707592999999992	WT	ICD-Ctrl	ICD
2	SO	JJ296	21.28548566666667	WT	ICD-Ctrl	ICD
2	SO	JJ297	31.618637666666668	WT	ICD-Ctrl	ICD
2	SO	JJ298	31.877869999999998	WT	ICD-Ctrl	ICD
2	SO	JJ327	17.34870666666666	DGdelta/-	ICD-Mutant	ICD
2	SO	JJ328	11.781696000000002	DGdelta/-	ICD-Mutant	ICD
2	SO	JJ329	27.090849000000002	DGdelta/-	ICD-Mutant	ICD
2	SO	JJ330	-2.5479493333333303	DGdelta/-	ICD-Mutant	ICD
2	SO	JJ335	38.324582	DGdelta/-	ICD-Mutant	ICD
2	SO	JJ336	68.94857466666667	DGdelta/-	ICD-Mutant	ICD
2	SO	JJ337	58.446557333333345	DGdelta/-	ICD-Mutant	ICD
2	SO	JJ338	28.210041999999998	DGdelta/-	ICD-Mutant	ICD
2	SO	JJ343	20.513792999999993	WT	ICD-Ctrl	ICD
2	SO	JJ344	19.573992333333326	WT	ICD-Ctrl	ICD
2	SO	JJ345	19.765158333333346	WT	ICD-Ctrl	ICD
2	SO	JJ346	2.5080189999999902	WT	ICD-Ctrl	ICD
2	SO	JJ351	47.73679533333333	WT	ICD-Ctrl	ICD
2	SO	JJ352	32.06457133333334	WT	ICD-Ctrl	ICD
2	SO	JJ353	-0.7874349999999927	WT	ICD-Ctrl	ICD
2	SO	JJ354	4.471557666666669	WT	ICD-Ctrl	ICD
2	SO	JJ359	6.721897366666667	FKRPMut	FKRP-Mutant	FKRP
2	SO	JJ360	12.082690666666664	FKRPMut	FKRP-Mutant	FKRP
2	SO	JJ361	43.954614666666664	FKRPMut	FKRP-Mutant	FKRP
2	SO	JJ366	25.77936799999999	WT	FKRP-Ctrl	FKRP
2	SO	JJ367	49.15408533333333	WT	FKRP-Ctrl	FKRP
2	SO	JJ368	22.119495166666677	WT	FKRP-Ctrl	FKRP
3	SO	JJ021	-16.485842000000005	WT	B4GAT1-Ctrl	B4GAT1
3	SO	JJ022	-20.46472766666666	WT	B4GAT1-Ctrl	B4GAT1
3	SO	JJ023	-8.901080000000007	WT	B4GAT1-Ctrl	B4GAT1
3	SO	JJ024	-25.305404666666686	WT	B4GAT1-Ctrl	B4GAT1
3	SO	JJ025	-7.956990333333333	B4GAT1M155T/M155T	B4GAT1-Mutant	B4GAT1
3	SO	JJ026	-7.812488000000002	B4GAT1M155T/M155T	B4GAT1-Mutant	B4GAT1
3	SO	JJ027	-16.038856666666664	B4GAT1M155T/M155T	B4GAT1-Mutant	B4GAT1
3	SO	JJ028	-4.324164000000001	B4GAT1M155T/M155T	B4GAT1-Mutant	B4GAT1
3	SO	JJ049	18.569055000000002	Emx-Cre+;POMT2F/F	Emx-POMT2-cKO	Emx-POMT2
3	SO	JJ050	7.693537666666667	Emx-Cre+;POMT2F/F	Emx-POMT2-cKO	Emx-POMT2
3	SO	JJ051	51.626339333333334	Emx-Cre+;POMT2F/F	Emx-POMT2-cKO	Emx-POMT2
3	SO	JJ052	27.216760666666687	Emx-Cre+;POMT2F/F	Emx-POMT2-cKO	Emx-POMT2
3	SO	JJ053	-8.823004666666662	Emx-Cre+;POMT2F/+	Emx-POMT2-Ctrl	Emx-POMT2
3	SO	JJ054	21.347067333333342	Emx-Cre+;POMT2F/+	Emx-POMT2-Ctrl	Emx-POMT2
3	SO	JJ055	180.9815266666667	Emx-Cre+;POMT2F/+	Emx-POMT2-Ctrl	Emx-POMT2
3	SO	JJ056	80.42608999999999	Emx-Cre+;POMT2F/+	Emx-POMT2-Ctrl	Emx-POMT2
3	SO	JJ057	-15.014679666666666	Emx-Cre+;POMT2F/+	Emx-POMT2-Ctrl	Emx-POMT2
3	SO	JJ058	44.65036633333333	Emx-Cre+;POMT2F/+	Emx-POMT2-Ctrl	Emx-POMT2
3	SO	JJ059	8.467227	Emx-Cre+;POMT2F/+	Emx-POMT2-Ctrl	Emx-POMT2
3	SO	JJ060	14.560625666666661	Emx-Cre+;POMT2F/+	Emx-POMT2-Ctrl	Emx-POMT2
3	SO	JJ069	-20.715269666666668	B4GAT1M155T/M155T	B4GAT1-Mutant	B4GAT1
3	SO	JJ070	6.685942999999999	B4GAT1M155T/M155T	B4GAT1-Mutant	B4GAT1
3	SO	JJ071	-28.18103199999999	B4GAT1M155T/M155T	B4GAT1-Mutant	B4GAT1
3	SO	JJ072	-25.15586833333333	B4GAT1M155T/M155T	B4GAT1-Mutant	B4GAT1
3	SO	JJ073	-11.72674366666667	B4GAT1M155T/M155T	B4GAT1-Mutant	B4GAT1
3	SO	JJ074	-21.88494733333332	B4GAT1M155T/M155T	B4GAT1-Mutant	B4GAT1
3	SO	JJ075	38.02529366666668	B4GAT1M155T/M155T	B4GAT1-Mutant	B4GAT1
3	SO	JJ076	6.2797770000000055	B4GAT1M155T/M155T	B4GAT1-Mutant	B4GAT1
3	SO	JJ081	4.1255849999999965	B4GAT1M155T/M155T	B4GAT1-Mutant	B4GAT1
3	SO	JJ082	-6.274785333333341	B4GAT1M155T/M155T	B4GAT1-Mutant	B4GAT1
3	SO	JJ083	5.475863500000003	B4GAT1M155T/M155T	B4GAT1-Mutant	B4GAT1
3	SO	JJ084	30.480470999999984	B4GAT1M155T/M155T	B4GAT1-Mutant	B4GAT1
3	SO	JJ085	19.958293666666673	B4GAT1M155T/M155T	B4GAT1-Mutant	B4GAT1
3	SO	JJ086	4.1609346666666625	B4GAT1M155T/M155T	B4GAT1-Mutant	B4GAT1
3	SO	JJ087	21.68440266666667	B4GAT1M155T/M155T	B4GAT1-Mutant	B4GAT1
3	SO	JJ088	31.281982	B4GAT1M155T/M155T	B4GAT1-Mutant	B4GAT1
3	SO	JJ097	1.964730666666668	WT	B4GAT1-Ctrl	B4GAT1
3	SO	JJ098	-5.4908653333333275	WT	B4GAT1-Ctrl	B4GAT1
3	SO	JJ099	18.60213833333334	WT	B4GAT1-Ctrl	B4GAT1
3	SO	JJ100	7.884214999999993	WT	B4GAT1-Ctrl	B4GAT1
3	SO	JJ105	48.75313833333333	WT	B4GAT1-Ctrl	B4GAT1
3	SO	JJ106	-8.447789000000009	WT	B4GAT1-Ctrl	B4GAT1
3	SO	JJ107	11.841284666666676	WT	B4GAT1-Ctrl	B4GAT1
3	SO	JJ108	5.083756999999996	WT	B4GAT1-Ctrl	B4GAT1
3	SO	JJ109	42.98025233333333	Emx-Cre+;DGF/-	Emx-DG-cKO	Emx-DG
3	SO	JJ110	45.10432866666667	Emx-Cre+;DGF/-	Emx-DG-cKO	Emx-DG
3	SO	JJ114	10.756869	Emx-Cre+;DGF/-	Emx-DG-cKO	Emx-DG
3	SO	JJ115	16.517456999999993	Emx-Cre+;DGF/-	Emx-DG-cKO	Emx-DG
3	SO	JJ116	11.089491999999998	Emx-Cre+;DGF/-	Emx-DG-cKO	Emx-DG
3	SO	JJ117	10.682584333333333	Emx-Cre+;DGF/-	Emx-DG-cKO	Emx-DG
3	SO	JJ130	23.485495666666665	Emx-Cre+;DGF/+	Emx-DG-Ctrl	Emx-DG
3	SO	JJ131	59.57979333333334	Emx-Cre+;DGF/+	Emx-DG-Ctrl	Emx-DG
3	SO	JJ132	22.990995666666663	Emx-Cre+;DGF/+	Emx-DG-Ctrl	Emx-DG
3	SO	JJ133	111.87295566666666	Emx-Cre+;DGF/+	Emx-DG-Ctrl	Emx-DG
3	SO	JJ146	5.401434999999997	Emx-Cre+;POMT2F/F	Emx-POMT2-cKO	Emx-POMT2
3	SO	JJ147	2.8692639999999963	Emx-Cre+;POMT2F/F	Emx-POMT2-cKO	Emx-POMT2
3	SO	JJ148	0.7479043333333285	Emx-Cre+;POMT2F/F	Emx-POMT2-cKO	Emx-POMT2
3	SO	JJ149	1.1905383333333361	Emx-Cre+;POMT2F/F	Emx-POMT2-cKO	Emx-POMT2
3	SO	JJ158	9.745149666666663	Emx-Cre+;POMT2F/+	Emx-POMT2-Ctrl	Emx-POMT2
3	SO	JJ159	-6.1257010000000065	Emx-Cre+;POMT2F/+	Emx-POMT2-Ctrl	Emx-POMT2
3	SO	JJ160	-0.14564933333333366	Emx-Cre+;POMT2F/+	Emx-POMT2-Ctrl	Emx-POMT2
3	SO	JJ161	7.543977333333335	Emx-Cre+;POMT2F/+	Emx-POMT2-Ctrl	Emx-POMT2
3	SO	JJ190	23.966914333333335	Emx-Cre+;DGF/-	Emx-DG-cKO	Emx-DG
3	SO	JJ191	48.03154700000001	Emx-Cre+;DGF/-	Emx-DG-cKO	Emx-DG
3	SO	JJ192	43.10628500000001	Emx-Cre+;DGF/-	Emx-DG-cKO	Emx-DG
3	SO	JJ193	50.43580566666667	Emx-Cre+;DGF/+	Emx-DG-Ctrl	Emx-DG
3	SO	JJ194	41.820931333333334	Emx-Cre+;DGF/+	Emx-DG-Ctrl	Emx-DG
3	SO	JJ195	33.93445900000001	Emx-Cre+;DGF/+	Emx-DG-Ctrl	Emx-DG
3	SO	JJ196	155.15108066666667	Emx-Cre+;DGF/+	Emx-DG-Ctrl	Emx-DG
3	SO	JJ201	-0.0014216666666631757	Emx-Cre+;DGF/-	Emx-DG-cKO	Emx-DG
3	SO	JJ202	-0.8864813333333311	Emx-Cre+;DGF/-	Emx-DG-cKO	Emx-DG
3	SO	JJ203	7.817102999999999	Emx-Cre+;DGF/-	Emx-DG-cKO	Emx-DG
3	SO	JJ204	18.075618000000002	Emx-Cre+;DGF/-	Emx-DG-cKO	Emx-DG
3	SO	JJ205	8.162476666666668	Emx-Cre+;DGF/+	Emx-DG-Ctrl	Emx-DG
3	SO	JJ206	8.845822666666672	Emx-Cre+;DGF/+	Emx-DG-Ctrl	Emx-DG
3	SO	JJ207	8.731961666666663	Emx-Cre+;DGF/+	Emx-DG-Ctrl	Emx-DG
3	SO	JJ208	-14.577276333333332	Emx-Cre+;DGF/+	Emx-DG-Ctrl	Emx-DG
3	SO	JJ209	12.477333666666667	Emx-Cre+;DGF/+	Emx-DG-Ctrl	Emx-DG
3	SO	JJ210	13.937704000000002	Emx-Cre+;DGF/+	Emx-DG-Ctrl	Emx-DG
3	SO	JJ211	-3.7653376666666674	Emx-Cre+;DGF/+	Emx-DG-Ctrl	Emx-DG
3	SO	JJ212	7.522069666666671	Emx-Cre+;DGF/+	Emx-DG-Ctrl	Emx-DG
3	SO	JJ213	4.358016333333329	Emx-Cre+;DGF/-	Emx-DG-cKO	Emx-DG
3	SO	JJ214	1.0494496666666702	Emx-Cre+;DGF/-	Emx-DG-cKO	Emx-DG
3	SO	JJ215	12.612966333333338	Emx-Cre+;DGF/+	Emx-DG-Ctrl	Emx-DG
3	SO	JJ216	21.010261666666665	Emx-Cre+;DGF/+	Emx-DG-Ctrl	Emx-DG
3	SO	JJ217	10.422039666666668	Emx-Cre+;DGF/+	Emx-DG-Ctrl	Emx-DG
3	SO	JJ218	11.510862666666668	Emx-Cre+;DGF/+	Emx-DG-Ctrl	Emx-DG
3	SO	JJ219	2.2444763333333335	Emx-Cre+;DGF/+	Emx-DG-Ctrl	Emx-DG
3	SO	JJ220	-4.297405333333335	Emx-Cre+;DGF/+	Emx-DG-Ctrl	Emx-DG
3	SO	JJ221	-0.9226989999999992	Emx-Cre+;DGF/+	Emx-DG-Ctrl	Emx-DG
3	SO	JJ222	5.066846333333331	Emx-Cre+;DGF/+	Emx-DG-Ctrl	Emx-DG
3	SO	JJ223	26.484776999999998	Emx-Cre+;POMT2F/F	Emx-POMT2-cKO	Emx-POMT2
3	SO	JJ224	3.46327833333333	Emx-Cre+;POMT2F/F	Emx-POMT2-cKO	Emx-POMT2
3	SO	JJ225	-4.644140333333335	Emx-Cre+;POMT2F/F	Emx-POMT2-cKO	Emx-POMT2
3	SO	JJ226	8.29175966666667	Emx-Cre+;POMT2F/F	Emx-POMT2-cKO	Emx-POMT2
3	SO	JJ231	42.15578099999999	Emx-Cre+;POMT2F/+	Emx-POMT2-Ctrl	Emx-POMT2
3	SO	JJ232	8.750085666666669	Emx-Cre+;POMT2F/+	Emx-POMT2-Ctrl	Emx-POMT2
3	SO	JJ233	22.197996666666654	Emx-Cre+;POMT2F/+	Emx-POMT2-Ctrl	Emx-POMT2
3	SO	JJ234	-0.867430666666659	Emx-Cre+;POMT2F/+	Emx-POMT2-Ctrl	Emx-POMT2
3	SO	JJ239	103.57908566666667	Emx-Cre+;POMT2F/+	Emx-POMT2-Ctrl	Emx-POMT2
3	SO	JJ240	118.07563733333333	Emx-Cre+;POMT2F/+	Emx-POMT2-Ctrl	Emx-POMT2
3	SO	JJ241	0.039624666666658946	Emx-Cre+;POMT2F/+	Emx-POMT2-Ctrl	Emx-POMT2
3	SO	JJ242	15.742101	Emx-Cre+;POMT2F/+	Emx-POMT2-Ctrl	Emx-POMT2
3	SO	JJ267	-13.56673166666667	FKRPMut	FKRP-Mutant	FKRP
3	SO	JJ268	-2.149991	FKRPMut	FKRP-Mutant	FKRP
3	SO	JJ269	7.90282666666666	FKRPMut	FKRP-Mutant	FKRP
3	SO	JJ270	-8.677665333333337	FKRPMut	FKRP-Mutant	FKRP
3	SO	JJ271	-3.0408679999999984	WT	FKRP-Ctrl	FKRP
3	SO	JJ272	7.497295666666669	WT	FKRP-Ctrl	FKRP
3	SO	JJ273	10.620287000000005	WT	FKRP-Ctrl	FKRP
3	SO	JJ274	1.867486666666674	WT	FKRP-Ctrl	FKRP
3	SO	JJ275	-3.565010000000001	WT	FKRP-Ctrl	FKRP
3	SO	JJ276	1.688470666666665	WT	FKRP-Ctrl	FKRP
3	SO	JJ277	-3.709496333333334	WT	FKRP-Ctrl	FKRP
3	SO	JJ278	3.116401333333343	WT	FKRP-Ctrl	FKRP
3	SO	JJ279	15.676957666666661	FKRPMut	FKRP-Mutant	FKRP
3	SO	JJ280	30.548405666666667	FKRPMut	FKRP-Mutant	FKRP
3	SO	JJ281	9.20538933333333	FKRPMut	FKRP-Mutant	FKRP
3	SO	JJ282	13.35304733333333	FKRPMut	FKRP-Mutant	FKRP
3	SO	JJ283	6.457319333333335	WT	FKRP-Ctrl	FKRP
3	SO	JJ284	15.313072333333338	WT	FKRP-Ctrl	FKRP
3	SO	JJ285	0.41449200000000036	WT	FKRP-Ctrl	FKRP
3	SO	JJ286	38.370420333333335	WT	FKRP-Ctrl	FKRP
3	SO	JJ287	7.005919999999999	DGdelta/-	ICD-Mutant	ICD
3	SO	JJ288	24.823304666666672	DGdelta/-	ICD-Mutant	ICD
3	SO	JJ289	48.34263333333333	DGdelta/-	ICD-Mutant	ICD
3	SO	JJ290	47.94046933333333	DGdelta/-	ICD-Mutant	ICD
3	SO	JJ295	29.490509666666668	WT	ICD-Ctrl	ICD
3	SO	JJ296	34.799135666666665	WT	ICD-Ctrl	ICD
3	SO	JJ297	33.57363766666666	WT	ICD-Ctrl	ICD
3	SO	JJ298	40.188453333333335	WT	ICD-Ctrl	ICD
3	SO	JJ327	24.462756666666664	DGdelta/-	ICD-Mutant	ICD
3	SO	JJ328	14.149946	DGdelta/-	ICD-Mutant	ICD
3	SO	JJ329	27.260582333333343	DGdelta/-	ICD-Mutant	ICD
3	SO	JJ330	-5.224965999999995	DGdelta/-	ICD-Mutant	ICD
3	SO	JJ335	40.52533199999999	DGdelta/-	ICD-Mutant	ICD
3	SO	JJ336	65.66380800000002	DGdelta/-	ICD-Mutant	ICD
3	SO	JJ337	60.698724	DGdelta/-	ICD-Mutant	ICD
3	SO	JJ338	26.81419199999999	DGdelta/-	ICD-Mutant	ICD
3	SO	JJ343	16.56465966666666	WT	ICD-Ctrl	ICD
3	SO	JJ344	24.88504233333332	WT	ICD-Ctrl	ICD
3	SO	JJ345	22.248058333333336	WT	ICD-Ctrl	ICD
3	SO	JJ346	10.277218999999993	WT	ICD-Ctrl	ICD
3	SO	JJ351	51.80831200000001	WT	ICD-Ctrl	ICD
3	SO	JJ352	23.121754666666664	WT	ICD-Ctrl	ICD
3	SO	JJ353	-1.503034999999997	WT	ICD-Ctrl	ICD
3	SO	JJ354	7.901574333333343	WT	ICD-Ctrl	ICD
3	SO	JJ359	5.48371903333333	FKRPMut	FKRP-Mutant	FKRP
3	SO	JJ360	11.193307333333331	FKRPMut	FKRP-Mutant	FKRP
3	SO	JJ361	41.725998	FKRPMut	FKRP-Mutant	FKRP
3	SO	JJ366	24.762618000000007	WT	FKRP-Ctrl	FKRP
3	SO	JJ367	51.738701999999996	WT	FKRP-Ctrl	FKRP
3	SO	JJ368	16.635801833333336	WT	FKRP-Ctrl	FKRP
4	SO	JJ021	-25.798091999999997	WT	B4GAT1-Ctrl	B4GAT1
4	SO	JJ022	-18.636111	WT	B4GAT1-Ctrl	B4GAT1
4	SO	JJ023	1.0938200000000033	WT	B4GAT1-Ctrl	B4GAT1
4	SO	JJ024	-15.358671333333339	WT	B4GAT1-Ctrl	B4GAT1
4	SO	JJ025	-3.893073666666671	B4GAT1M155T/M155T	B4GAT1-Mutant	B4GAT1
4	SO	JJ026	-3.416254666666665	B4GAT1M155T/M155T	B4GAT1-Mutant	B4GAT1
4	SO	JJ027	-13.788239999999995	B4GAT1M155T/M155T	B4GAT1-Mutant	B4GAT1
4	SO	JJ028	-2.487014000000007	B4GAT1M155T/M155T	B4GAT1-Mutant	B4GAT1
4	SO	JJ049	20.148155000000003	Emx-Cre+;POMT2F/F	Emx-POMT2-cKO	Emx-POMT2
4	SO	JJ050	22.49280433333334	Emx-Cre+;POMT2F/F	Emx-POMT2-cKO	Emx-POMT2
4	SO	JJ051	64.850206	Emx-Cre+;POMT2F/F	Emx-POMT2-cKO	Emx-POMT2
4	SO	JJ052	34.442594000000014	Emx-Cre+;POMT2F/F	Emx-POMT2-cKO	Emx-POMT2
4	SO	JJ053	-4.421737999999995	Emx-Cre+;POMT2F/+	Emx-POMT2-Ctrl	Emx-POMT2
4	SO	JJ054	19.960083999999995	Emx-Cre+;POMT2F/+	Emx-POMT2-Ctrl	Emx-POMT2
4	SO	JJ055	141.65231	Emx-Cre+;POMT2F/+	Emx-POMT2-Ctrl	Emx-POMT2
4	SO	JJ056	92.17804000000001	Emx-Cre+;POMT2F/+	Emx-POMT2-Ctrl	Emx-POMT2
4	SO	JJ057	-3.1716796666666767	Emx-Cre+;POMT2F/+	Emx-POMT2-Ctrl	Emx-POMT2
4	SO	JJ058	53.512199666666675	Emx-Cre+;POMT2F/+	Emx-POMT2-Ctrl	Emx-POMT2
4	SO	JJ059	17.116810333333337	Emx-Cre+;POMT2F/+	Emx-POMT2-Ctrl	Emx-POMT2
4	SO	JJ060	17.775642333333327	Emx-Cre+;POMT2F/+	Emx-POMT2-Ctrl	Emx-POMT2
4	SO	JJ069	-15.173186333333334	B4GAT1M155T/M155T	B4GAT1-Mutant	B4GAT1
4	SO	JJ070	13.948243	B4GAT1M155T/M155T	B4GAT1-Mutant	B4GAT1
4	SO	JJ071	-13.753298666666666	B4GAT1M155T/M155T	B4GAT1-Mutant	B4GAT1
4	SO	JJ072	-20.112751666666664	B4GAT1M155T/M155T	B4GAT1-Mutant	B4GAT1
4	SO	JJ073	-8.995877000000007	B4GAT1M155T/M155T	B4GAT1-Mutant	B4GAT1
4	SO	JJ074	-13.895563999999988	B4GAT1M155T/M155T	B4GAT1-Mutant	B4GAT1
4	SO	JJ075	34.466477000000005	B4GAT1M155T/M155T	B4GAT1-Mutant	B4GAT1
4	SO	JJ076	-5.316772999999993	B4GAT1M155T/M155T	B4GAT1-Mutant	B4GAT1
4	SO	JJ081	-1.6160983333333359	B4GAT1M155T/M155T	B4GAT1-Mutant	B4GAT1
4	SO	JJ082	5.546864666666664	B4GAT1M155T/M155T	B4GAT1-Mutant	B4GAT1
4	SO	JJ083	-5.0037115000000085	B4GAT1M155T/M155T	B4GAT1-Mutant	B4GAT1
4	SO	JJ084	28.238887666666656	B4GAT1M155T/M155T	B4GAT1-Mutant	B4GAT1
4	SO	JJ085	25.707843666666673	B4GAT1M155T/M155T	B4GAT1-Mutant	B4GAT1
4	SO	JJ086	13.456968000000009	B4GAT1M155T/M155T	B4GAT1-Mutant	B4GAT1
4	SO	JJ087	24.86241933333334	B4GAT1M155T/M155T	B4GAT1-Mutant	B4GAT1
4	SO	JJ088	21.540265333333327	B4GAT1M155T/M155T	B4GAT1-Mutant	B4GAT1
4	SO	JJ097	8.819030666666663	WT	B4GAT1-Ctrl	B4GAT1
4	SO	JJ098	19.42448466666667	WT	B4GAT1-Ctrl	B4GAT1
4	SO	JJ099	1.8611050000000045	WT	B4GAT1-Ctrl	B4GAT1
4	SO	JJ100	17.26414833333334	WT	B4GAT1-Ctrl	B4GAT1
4	SO	JJ105	47.198955000000005	WT	B4GAT1-Ctrl	B4GAT1
4	SO	JJ106	3.627160999999996	WT	B4GAT1-Ctrl	B4GAT1
4	SO	JJ107	24.259618000000007	WT	B4GAT1-Ctrl	B4GAT1
4	SO	JJ108	5.931140333333332	WT	B4GAT1-Ctrl	B4GAT1
4	SO	JJ109	38.527668999999996	Emx-Cre+;DGF/-	Emx-DG-cKO	Emx-DG
4	SO	JJ110	41.451162000000004	Emx-Cre+;DGF/-	Emx-DG-cKO	Emx-DG
4	SO	JJ114	16.35583566666666	Emx-Cre+;DGF/-	Emx-DG-cKO	Emx-DG
4	SO	JJ115	23.700773666666663	Emx-Cre+;DGF/-	Emx-DG-cKO	Emx-DG
4	SO	JJ116	13.18867533333333	Emx-Cre+;DGF/-	Emx-DG-cKO	Emx-DG
4	SO	JJ117	10.869317666666666	Emx-Cre+;DGF/-	Emx-DG-cKO	Emx-DG
4	SO	JJ130	17.364879	Emx-Cre+;DGF/+	Emx-DG-Ctrl	Emx-DG
4	SO	JJ131	86.77036	Emx-Cre+;DGF/+	Emx-DG-Ctrl	Emx-DG
4	SO	JJ132	26.885878999999992	Emx-Cre+;DGF/+	Emx-DG-Ctrl	Emx-DG
4	SO	JJ133	107.425939	Emx-Cre+;DGF/+	Emx-DG-Ctrl	Emx-DG
4	SO	JJ146	6.08906833333333	Emx-Cre+;POMT2F/F	Emx-POMT2-cKO	Emx-POMT2
4	SO	JJ147	-1.7718860000000045	Emx-Cre+;POMT2F/F	Emx-POMT2-cKO	Emx-POMT2
4	SO	JJ148	3.0666043333333306	Emx-Cre+;POMT2F/F	Emx-POMT2-cKO	Emx-POMT2
4	SO	JJ149	3.8677549999999976	Emx-Cre+;POMT2F/F	Emx-POMT2-cKO	Emx-POMT2
4	SO	JJ158	5.912716333333331	Emx-Cre+;POMT2F/+	Emx-POMT2-Ctrl	Emx-POMT2
4	SO	JJ159	-2.43178433333334	Emx-Cre+;POMT2F/+	Emx-POMT2-Ctrl	Emx-POMT2
4	SO	JJ160	4.049517333333331	Emx-Cre+;POMT2F/+	Emx-POMT2-Ctrl	Emx-POMT2
4	SO	JJ161	9.545493999999996	Emx-Cre+;POMT2F/+	Emx-POMT2-Ctrl	Emx-POMT2
4	SO	JJ190	25.408664333333345	Emx-Cre+;DGF/-	Emx-DG-cKO	Emx-DG
4	SO	JJ191	53.572147	Emx-Cre+;DGF/-	Emx-DG-cKO	Emx-DG
4	SO	JJ192	38.00621833333333	Emx-Cre+;DGF/-	Emx-DG-cKO	Emx-DG
4	SO	JJ193	55.567039	Emx-Cre+;DGF/+	Emx-DG-Ctrl	Emx-DG
4	SO	JJ194	44.173348	Emx-Cre+;DGF/+	Emx-DG-Ctrl	Emx-DG
4	SO	JJ195	41.64262566666667	Emx-Cre+;DGF/+	Emx-DG-Ctrl	Emx-DG
4	SO	JJ196	141.99364733333334	Emx-Cre+;DGF/+	Emx-DG-Ctrl	Emx-DG
4	SO	JJ201	2.6212116666666674	Emx-Cre+;DGF/-	Emx-DG-cKO	Emx-DG
4	SO	JJ202	-3.402897999999998	Emx-Cre+;DGF/-	Emx-DG-cKO	Emx-DG
4	SO	JJ203	9.126419666666669	Emx-Cre+;DGF/-	Emx-DG-cKO	Emx-DG
4	SO	JJ204	17.941701333333327	Emx-Cre+;DGF/-	Emx-DG-cKO	Emx-DG
4	SO	JJ205	10.399243333333336	Emx-Cre+;DGF/+	Emx-DG-Ctrl	Emx-DG
4	SO	JJ206	10.351989333333341	Emx-Cre+;DGF/+	Emx-DG-Ctrl	Emx-DG
4	SO	JJ207	10.249911666666662	Emx-Cre+;DGF/+	Emx-DG-Ctrl	Emx-DG
4	SO	JJ208	-5.573809666666665	Emx-Cre+;DGF/+	Emx-DG-Ctrl	Emx-DG
4	SO	JJ209	10.827533666666662	Emx-Cre+;DGF/+	Emx-DG-Ctrl	Emx-DG
4	SO	JJ210	20.909637333333336	Emx-Cre+;DGF/+	Emx-DG-Ctrl	Emx-DG
4	SO	JJ211	0.5097290000000024	Emx-Cre+;DGF/+	Emx-DG-Ctrl	Emx-DG
4	SO	JJ212	3.4364363333333423	Emx-Cre+;DGF/+	Emx-DG-Ctrl	Emx-DG
4	SO	JJ213	5.9834163333333334	Emx-Cre+;DGF/-	Emx-DG-cKO	Emx-DG
4	SO	JJ214	1.805866333333339	Emx-Cre+;DGF/-	Emx-DG-cKO	Emx-DG
4	SO	JJ215	13.047216333333333	Emx-Cre+;DGF/+	Emx-DG-Ctrl	Emx-DG
4	SO	JJ216	21.63281166666667	Emx-Cre+;DGF/+	Emx-DG-Ctrl	Emx-DG
4	SO	JJ217	17.10000633333333	Emx-Cre+;DGF/+	Emx-DG-Ctrl	Emx-DG
4	SO	JJ218	10.925295999999998	Emx-Cre+;DGF/+	Emx-DG-Ctrl	Emx-DG
4	SO	JJ219	2.166309666666668	Emx-Cre+;DGF/+	Emx-DG-Ctrl	Emx-DG
4	SO	JJ220	-2.9808386666666706	Emx-Cre+;DGF/+	Emx-DG-Ctrl	Emx-DG
4	SO	JJ221	-1.242765666666666	Emx-Cre+;DGF/+	Emx-DG-Ctrl	Emx-DG
4	SO	JJ222	7.083162999999999	Emx-Cre+;DGF/+	Emx-DG-Ctrl	Emx-DG
4	SO	JJ223	29.716293666666672	Emx-Cre+;POMT2F/F	Emx-POMT2-cKO	Emx-POMT2
4	SO	JJ224	5.359661666666663	Emx-Cre+;POMT2F/F	Emx-POMT2-cKO	Emx-POMT2
4	SO	JJ225	-4.5298403333333255	Emx-Cre+;POMT2F/F	Emx-POMT2-cKO	Emx-POMT2
4	SO	JJ226	6.236376333333335	Emx-Cre+;POMT2F/F	Emx-POMT2-cKO	Emx-POMT2
4	SO	JJ231	35.49866433333332	Emx-Cre+;POMT2F/+	Emx-POMT2-Ctrl	Emx-POMT2
4	SO	JJ232	8.867469	Emx-Cre+;POMT2F/+	Emx-POMT2-Ctrl	Emx-POMT2
4	SO	JJ233	18.513629999999996	Emx-Cre+;POMT2F/+	Emx-POMT2-Ctrl	Emx-POMT2
4	SO	JJ234	5.427569333333338	Emx-Cre+;POMT2F/+	Emx-POMT2-Ctrl	Emx-POMT2
4	SO	JJ239	113.56356899999999	Emx-Cre+;POMT2F/+	Emx-POMT2-Ctrl	Emx-POMT2
4	SO	JJ240	109.11083733333332	Emx-Cre+;POMT2F/+	Emx-POMT2-Ctrl	Emx-POMT2
4	SO	JJ241	-3.5754086666666702	Emx-Cre+;POMT2F/+	Emx-POMT2-Ctrl	Emx-POMT2
4	SO	JJ242	19.439034333333336	Emx-Cre+;POMT2F/+	Emx-POMT2-Ctrl	Emx-POMT2
4	SO	JJ267	-15.51468166666667	FKRPMut	FKRP-Mutant	FKRP
4	SO	JJ268	-6.4220409999999974	FKRPMut	FKRP-Mutant	FKRP
4	SO	JJ269	6.445910000000002	FKRPMut	FKRP-Mutant	FKRP
4	SO	JJ270	-5.917031999999996	FKRPMut	FKRP-Mutant	FKRP
4	SO	JJ271	-4.612334666666665	WT	FKRP-Ctrl	FKRP
4	SO	JJ272	6.012362333333338	WT	FKRP-Ctrl	FKRP
4	SO	JJ273	8.345587000000004	WT	FKRP-Ctrl	FKRP
4	SO	JJ274	4.0130700000000035	WT	FKRP-Ctrl	FKRP
4	SO	JJ275	-8.73845999999999	WT	FKRP-Ctrl	FKRP
4	SO	JJ276	2.209553999999988	WT	FKRP-Ctrl	FKRP
4	SO	JJ277	-2.8057296666666645	WT	FKRP-Ctrl	FKRP
4	SO	JJ278	2.760768000000008	WT	FKRP-Ctrl	FKRP
4	SO	JJ279	16.411440999999996	FKRPMut	FKRP-Mutant	FKRP
4	SO	JJ280	29.01327233333333	FKRPMut	FKRP-Mutant	FKRP
4	SO	JJ281	11.930339333333336	FKRPMut	FKRP-Mutant	FKRP
4	SO	JJ282	13.82649733333333	FKRPMut	FKRP-Mutant	FKRP
4	SO	JJ283	9.061119333333332	WT	FKRP-Ctrl	FKRP
4	SO	JJ284	12.488739	WT	FKRP-Ctrl	FKRP
4	SO	JJ285	0.3686753333333333	WT	FKRP-Ctrl	FKRP
4	SO	JJ286	48.88925366666666	WT	FKRP-Ctrl	FKRP
4	SO	JJ287	6.153786666666666	DGdelta/-	ICD-Mutant	ICD
4	SO	JJ288	27.598204666666664	DGdelta/-	ICD-Mutant	ICD
4	SO	JJ289	35.61671666666667	DGdelta/-	ICD-Mutant	ICD
4	SO	JJ290	71.80653600000001	DGdelta/-	ICD-Mutant	ICD
4	SO	JJ295	38.48417633333333	WT	ICD-Ctrl	ICD
4	SO	JJ296	50.230152333333336	WT	ICD-Ctrl	ICD
4	SO	JJ297	34.226221	WT	ICD-Ctrl	ICD
4	SO	JJ298	46.51145333333334	WT	ICD-Ctrl	ICD
4	SO	JJ327	23.31795666666667	DGdelta/-	ICD-Mutant	ICD
4	SO	JJ328	25.505279333333334	DGdelta/-	ICD-Mutant	ICD
4	SO	JJ329	28.855848999999996	DGdelta/-	ICD-Mutant	ICD
4	SO	JJ330	-6.985865999999997	DGdelta/-	ICD-Mutant	ICD
4	SO	JJ335	41.07541533333333	DGdelta/-	ICD-Mutant	ICD
4	SO	JJ336	31.28149133333333	DGdelta/-	ICD-Mutant	ICD
4	SO	JJ337	54.09255733333334	DGdelta/-	ICD-Mutant	ICD
4	SO	JJ338	29.257291999999993	DGdelta/-	ICD-Mutant	ICD
4	SO	JJ343	17.955376333333344	WT	ICD-Ctrl	ICD
4	SO	JJ344	18.236575666666663	WT	ICD-Ctrl	ICD
4	SO	JJ345	16.99357500000001	WT	ICD-Ctrl	ICD
4	SO	JJ346	13.358268999999993	WT	ICD-Ctrl	ICD
4	SO	JJ351	35.115295333333336	WT	ICD-Ctrl	ICD
4	SO	JJ352	11.713321333333331	WT	ICD-Ctrl	ICD
4	SO	JJ353	-0.5122683333333242	WT	ICD-Ctrl	ICD
4	SO	JJ354	12.52405766666667	WT	ICD-Ctrl	ICD
4	SO	JJ359	3.2674556999999993	FKRPMut	FKRP-Mutant	FKRP
4	SO	JJ360	14.223774	FKRPMut	FKRP-Mutant	FKRP
4	SO	JJ361	43.39728133333333	FKRPMut	FKRP-Mutant	FKRP
4	SO	JJ366	23.350284666666667	WT	FKRP-Ctrl	FKRP
4	SO	JJ367	44.15433533333333	WT	FKRP-Ctrl	FKRP
4	SO	JJ368	14.972320166666671	WT	FKRP-Ctrl	FKRP
5	SO	JJ021	-29.050642	WT	B4GAT1-Ctrl	B4GAT1
5	SO	JJ022	-15.61712766666667	WT	B4GAT1-Ctrl	B4GAT1
5	SO	JJ023	21.265786666666656	WT	B4GAT1-Ctrl	B4GAT1
5	SO	JJ024	-12.930204666666677	WT	B4GAT1-Ctrl	B4GAT1
5	SO	JJ025	-1.227723666666672	B4GAT1M155T/M155T	B4GAT1-Mutant	B4GAT1
5	SO	JJ026	-7.008621333333328	B4GAT1M155T/M155T	B4GAT1-Mutant	B4GAT1
5	SO	JJ027	-15.859789999999997	B4GAT1M155T/M155T	B4GAT1-Mutant	B4GAT1
5	SO	JJ028	-7.703497333333331	B4GAT1M155T/M155T	B4GAT1-Mutant	B4GAT1
5	SO	JJ049	31.60798833333334	Emx-Cre+;POMT2F/F	Emx-POMT2-cKO	Emx-POMT2
5	SO	JJ050	29.423604333333326	Emx-Cre+;POMT2F/F	Emx-POMT2-cKO	Emx-POMT2
5	SO	JJ051	39.608672666666656	Emx-Cre+;POMT2F/F	Emx-POMT2-cKO	Emx-POMT2
5	SO	JJ052	42.31669400000002	Emx-Cre+;POMT2F/F	Emx-POMT2-cKO	Emx-POMT2
5	SO	JJ053	-8.457271333333324	Emx-Cre+;POMT2F/+	Emx-POMT2-Ctrl	Emx-POMT2
5	SO	JJ054	30.556067333333328	Emx-Cre+;POMT2F/+	Emx-POMT2-Ctrl	Emx-POMT2
5	SO	JJ055	105.16366000000002	Emx-Cre+;POMT2F/+	Emx-POMT2-Ctrl	Emx-POMT2
5	SO	JJ056	102.09102333333333	Emx-Cre+;POMT2F/+	Emx-POMT2-Ctrl	Emx-POMT2
5	SO	JJ057	-3.5070796666666695	Emx-Cre+;POMT2F/+	Emx-POMT2-Ctrl	Emx-POMT2
5	SO	JJ058	43.44969966666667	Emx-Cre+;POMT2F/+	Emx-POMT2-Ctrl	Emx-POMT2
5	SO	JJ059	20.259693666666674	Emx-Cre+;POMT2F/+	Emx-POMT2-Ctrl	Emx-POMT2
5	SO	JJ060	2.2942256666666574	Emx-Cre+;POMT2F/+	Emx-POMT2-Ctrl	Emx-POMT2
5	SO	JJ069	-14.240203000000003	B4GAT1M155T/M155T	B4GAT1-Mutant	B4GAT1
5	SO	JJ070	24.391676333333333	B4GAT1M155T/M155T	B4GAT1-Mutant	B4GAT1
5	SO	JJ071	-24.52309866666666	B4GAT1M155T/M155T	B4GAT1-Mutant	B4GAT1
5	SO	JJ072	-12.721868333333328	B4GAT1M155T/M155T	B4GAT1-Mutant	B4GAT1
5	SO	JJ073	1.00732299999999	B4GAT1M155T/M155T	B4GAT1-Mutant	B4GAT1
5	SO	JJ074	-17.364147333333324	B4GAT1M155T/M155T	B4GAT1-Mutant	B4GAT1
5	SO	JJ075	44.48609366666667	B4GAT1M155T/M155T	B4GAT1-Mutant	B4GAT1
5	SO	JJ076	13.307777000000007	B4GAT1M155T/M155T	B4GAT1-Mutant	B4GAT1
5	SO	JJ081	-10.948081666666662	B4GAT1M155T/M155T	B4GAT1-Mutant	B4GAT1
5	SO	JJ082	15.246614666666659	B4GAT1M155T/M155T	B4GAT1-Mutant	B4GAT1
5	SO	JJ083	-12.45173650000001	B4GAT1M155T/M155T	B4GAT1-Mutant	B4GAT1
5	SO	JJ084	22.33267099999999	B4GAT1M155T/M155T	B4GAT1-Mutant	B4GAT1
5	SO	JJ085	54.91889366666666	B4GAT1M155T/M155T	B4GAT1-Mutant	B4GAT1
5	SO	JJ086	19.647334666666666	B4GAT1M155T/M155T	B4GAT1-Mutant	B4GAT1
5	SO	JJ087	37.191602666666675	B4GAT1M155T/M155T	B4GAT1-Mutant	B4GAT1
5	SO	JJ088	24.388182	B4GAT1M155T/M155T	B4GAT1-Mutant	B4GAT1
5	SO	JJ097	27.28793066666667	WT	B4GAT1-Ctrl	B4GAT1
5	SO	JJ098	21.171068000000002	WT	B4GAT1-Ctrl	B4GAT1
5	SO	JJ099	13.648805000000001	WT	B4GAT1-Ctrl	B4GAT1
5	SO	JJ100	13.84754833333333	WT	B4GAT1-Ctrl	B4GAT1
5	SO	JJ105	35.979471666666676	WT	B4GAT1-Ctrl	B4GAT1
5	SO	JJ106	11.94721099999999	WT	B4GAT1-Ctrl	B4GAT1
5	SO	JJ107	14.374218000000004	WT	B4GAT1-Ctrl	B4GAT1
5	SO	JJ108	25.44969033333334	WT	B4GAT1-Ctrl	B4GAT1
5	SO	JJ109	45.80318566666667	Emx-Cre+;DGF/-	Emx-DG-cKO	Emx-DG
5	SO	JJ110	33.98846199999999	Emx-Cre+;DGF/-	Emx-DG-cKO	Emx-DG
5	SO	JJ114	12.90220233333333	Emx-Cre+;DGF/-	Emx-DG-cKO	Emx-DG
5	SO	JJ115	29.027923666666666	Emx-Cre+;DGF/-	Emx-DG-cKO	Emx-DG
5	SO	JJ116	8.649958666666668	Emx-Cre+;DGF/-	Emx-DG-cKO	Emx-DG
5	SO	JJ117	7.546650999999997	Emx-Cre+;DGF/-	Emx-DG-cKO	Emx-DG
5	SO	JJ130	15.664629	Emx-Cre+;DGF/+	Emx-DG-Ctrl	Emx-DG
5	SO	JJ131	106.29112666666666	Emx-Cre+;DGF/+	Emx-DG-Ctrl	Emx-DG
5	SO	JJ132	23.76926233333333	Emx-Cre+;DGF/+	Emx-DG-Ctrl	Emx-DG
5	SO	JJ133	93.36035566666666	Emx-Cre+;DGF/+	Emx-DG-Ctrl	Emx-DG
5	SO	JJ146	10.160768333333332	Emx-Cre+;POMT2F/F	Emx-POMT2-cKO	Emx-POMT2
5	SO	JJ147	-0.4207360000000051	Emx-Cre+;POMT2F/F	Emx-POMT2-cKO	Emx-POMT2
5	SO	JJ148	4.0263709999999975	Emx-Cre+;POMT2F/F	Emx-POMT2-cKO	Emx-POMT2
5	SO	JJ149	5.445671666666665	Emx-Cre+;POMT2F/F	Emx-POMT2-cKO	Emx-POMT2
5	SO	JJ158	0.5508163333333348	Emx-Cre+;POMT2F/+	Emx-POMT2-Ctrl	Emx-POMT2
5	SO	JJ159	12.055965666666665	Emx-Cre+;POMT2F/+	Emx-POMT2-Ctrl	Emx-POMT2
5	SO	JJ160	-1.1894493333333382	Emx-Cre+;POMT2F/+	Emx-POMT2-Ctrl	Emx-POMT2
5	SO	JJ161	4.949577333333333	Emx-Cre+;POMT2F/+	Emx-POMT2-Ctrl	Emx-POMT2
5	SO	JJ190	24.697781000000006	Emx-Cre+;DGF/-	Emx-DG-cKO	Emx-DG
5	SO	JJ191	54.53574699999999	Emx-Cre+;DGF/-	Emx-DG-cKO	Emx-DG
5	SO	JJ192	32.51641833333334	Emx-Cre+;DGF/-	Emx-DG-cKO	Emx-DG
5	SO	JJ193	70.11713900000001	Emx-Cre+;DGF/+	Emx-DG-Ctrl	Emx-DG
5	SO	JJ194	40.302931333333326	Emx-Cre+;DGF/+	Emx-DG-Ctrl	Emx-DG
5	SO	JJ195	38.117859	Emx-Cre+;DGF/+	Emx-DG-Ctrl	Emx-DG
5	SO	JJ196	115.78768066666667	Emx-Cre+;DGF/+	Emx-DG-Ctrl	Emx-DG
5	SO	JJ201	4.547178333333335	Emx-Cre+;DGF/-	Emx-DG-cKO	Emx-DG
5	SO	JJ202	-1.8579480000000028	Emx-Cre+;DGF/-	Emx-DG-cKO	Emx-DG
5	SO	JJ203	9.101769666666664	Emx-Cre+;DGF/-	Emx-DG-cKO	Emx-DG
5	SO	JJ204	16.858551333333324	Emx-Cre+;DGF/-	Emx-DG-cKO	Emx-DG
5	SO	JJ205	12.277810000000002	Emx-Cre+;DGF/+	Emx-DG-Ctrl	Emx-DG
5	SO	JJ206	11.343556000000001	Emx-Cre+;DGF/+	Emx-DG-Ctrl	Emx-DG
5	SO	JJ207	11.918828333333328	Emx-Cre+;DGF/+	Emx-DG-Ctrl	Emx-DG
5	SO	JJ208	-10.090009666666667	Emx-Cre+;DGF/+	Emx-DG-Ctrl	Emx-DG
5	SO	JJ209	12.857467	Emx-Cre+;DGF/+	Emx-DG-Ctrl	Emx-DG
5	SO	JJ210	21.024103999999994	Emx-Cre+;DGF/+	Emx-DG-Ctrl	Emx-DG
5	SO	JJ211	2.1071290000000005	Emx-Cre+;DGF/+	Emx-DG-Ctrl	Emx-DG
5	SO	JJ212	2.8921363333333403	Emx-Cre+;DGF/+	Emx-DG-Ctrl	Emx-DG
5	SO	JJ213	5.555816333333333	Emx-Cre+;DGF/-	Emx-DG-cKO	Emx-DG
5	SO	JJ214	1.6206496666666723	Emx-Cre+;DGF/-	Emx-DG-cKO	Emx-DG
5	SO	JJ215	15.673632999999995	Emx-Cre+;DGF/+	Emx-DG-Ctrl	Emx-DG
5	SO	JJ216	18.465795000000004	Emx-Cre+;DGF/+	Emx-DG-Ctrl	Emx-DG
5	SO	JJ217	14.916772999999997	Emx-Cre+;DGF/+	Emx-DG-Ctrl	Emx-DG
5	SO	JJ218	11.687329333333333	Emx-Cre+;DGF/+	Emx-DG-Ctrl	Emx-DG
5	SO	JJ219	2.001476333333334	Emx-Cre+;DGF/+	Emx-DG-Ctrl	Emx-DG
5	SO	JJ220	-2.20680533333334	Emx-Cre+;DGF/+	Emx-DG-Ctrl	Emx-DG
5	SO	JJ221	0.17123433333333082	Emx-Cre+;DGF/+	Emx-DG-Ctrl	Emx-DG
5	SO	JJ222	9.411713	Emx-Cre+;DGF/+	Emx-DG-Ctrl	Emx-DG
5	SO	JJ223	22.029910333333333	Emx-Cre+;POMT2F/F	Emx-POMT2-cKO	Emx-POMT2
5	SO	JJ224	-0.0059883333333345945	Emx-Cre+;POMT2F/F	Emx-POMT2-cKO	Emx-POMT2
5	SO	JJ225	-2.026407000000001	Emx-Cre+;POMT2F/F	Emx-POMT2-cKO	Emx-POMT2
5	SO	JJ226	11.816826333333339	Emx-Cre+;POMT2F/F	Emx-POMT2-cKO	Emx-POMT2
5	SO	JJ231	31.257047666666654	Emx-Cre+;POMT2F/+	Emx-POMT2-Ctrl	Emx-POMT2
5	SO	JJ232	8.158619000000007	Emx-Cre+;POMT2F/+	Emx-POMT2-Ctrl	Emx-POMT2
5	SO	JJ233	12.96959666666666	Emx-Cre+;POMT2F/+	Emx-POMT2-Ctrl	Emx-POMT2
5	SO	JJ234	10.593036000000007	Emx-Cre+;POMT2F/+	Emx-POMT2-Ctrl	Emx-POMT2
5	SO	JJ239	97.072819	Emx-Cre+;POMT2F/+	Emx-POMT2-Ctrl	Emx-POMT2
5	SO	JJ240	102.69477066666668	Emx-Cre+;POMT2F/+	Emx-POMT2-Ctrl	Emx-POMT2
5	SO	JJ241	-6.305708666666665	Emx-Cre+;POMT2F/+	Emx-POMT2-Ctrl	Emx-POMT2
5	SO	JJ242	27.84510100000001	Emx-Cre+;POMT2F/+	Emx-POMT2-Ctrl	Emx-POMT2
5	SO	JJ267	-10.223465	FKRPMut	FKRP-Mutant	FKRP
5	SO	JJ268	-7.876324333333329	FKRPMut	FKRP-Mutant	FKRP
5	SO	JJ269	-1.2791066666666684	FKRPMut	FKRP-Mutant	FKRP
5	SO	JJ270	-4.041665333333332	FKRPMut	FKRP-Mutant	FKRP
5	SO	JJ271	0.3251319999999964	WT	FKRP-Ctrl	FKRP
5	SO	JJ272	5.869429000000001	WT	FKRP-Ctrl	FKRP
5	SO	JJ273	11.15535366666667	WT	FKRP-Ctrl	FKRP
5	SO	JJ274	4.645620000000004	WT	FKRP-Ctrl	FKRP
5	SO	JJ275	-6.0368766666666716	WT	FKRP-Ctrl	FKRP
5	SO	JJ276	7.457603999999994	WT	FKRP-Ctrl	FKRP
5	SO	JJ277	0.520637000000003	WT	FKRP-Ctrl	FKRP
5	SO	JJ278	3.693334666666672	WT	FKRP-Ctrl	FKRP
5	SO	JJ279	19.352890999999996	FKRPMut	FKRP-Mutant	FKRP
5	SO	JJ280	25.233605666666666	FKRPMut	FKRP-Mutant	FKRP
5	SO	JJ281	12.181789333333327	FKRPMut	FKRP-Mutant	FKRP
5	SO	JJ282	17.563247333333337	FKRPMut	FKRP-Mutant	FKRP
5	SO	JJ283	16.286119333333332	WT	FKRP-Ctrl	FKRP
5	SO	JJ284	15.750005666666672	WT	FKRP-Ctrl	FKRP
5	SO	JJ285	-1.447374666666666	WT	FKRP-Ctrl	FKRP
5	SO	JJ286	58.17642033333333	WT	FKRP-Ctrl	FKRP
5	SO	JJ287	1.847520000000003	DGdelta/-	ICD-Mutant	ICD
5	SO	JJ288	26.003704666666675	DGdelta/-	ICD-Mutant	ICD
5	SO	JJ289	23.727499999999996	DGdelta/-	ICD-Mutant	ICD
5	SO	JJ290	80.33180266666666	DGdelta/-	ICD-Mutant	ICD
5	SO	JJ295	42.97597633333333	WT	ICD-Ctrl	ICD
5	SO	JJ296	46.217469	WT	ICD-Ctrl	ICD
5	SO	JJ297	29.585771000000005	WT	ICD-Ctrl	ICD
5	SO	JJ298	44.13525333333334	WT	ICD-Ctrl	ICD
5	SO	JJ327	23.50502333333333	DGdelta/-	ICD-Mutant	ICD
5	SO	JJ328	28.143012666666664	DGdelta/-	ICD-Mutant	ICD
5	SO	JJ329	30.09771566666667	DGdelta/-	ICD-Mutant	ICD
5	SO	JJ330	-3.180432666666661	DGdelta/-	ICD-Mutant	ICD
5	SO	JJ335	31.341465333333332	DGdelta/-	ICD-Mutant	ICD
5	SO	JJ336	35.052474666666676	DGdelta/-	ICD-Mutant	ICD
5	SO	JJ337	65.40559066666667	DGdelta/-	ICD-Mutant	ICD
5	SO	JJ338	27.044058666666675	DGdelta/-	ICD-Mutant	ICD
5	SO	JJ343	17.23845966666666	WT	ICD-Ctrl	ICD
5	SO	JJ344	15.55957566666666	WT	ICD-Ctrl	ICD
5	SO	JJ345	18.606391666666667	WT	ICD-Ctrl	ICD
5	SO	JJ346	7.138418999999999	WT	ICD-Ctrl	ICD
5	SO	JJ351	30.01371200000001	WT	ICD-Ctrl	ICD
5	SO	JJ352	15.99375466666666	WT	ICD-Ctrl	ICD
5	SO	JJ353	2.1178983333333385	WT	ICD-Ctrl	ICD
5	SO	JJ354	20.999307666666656	WT	ICD-Ctrl	ICD
5	SO	JJ359	1.4467590333333267	FKRPMut	FKRP-Mutant	FKRP
5	SO	JJ360	17.736907333333335	FKRPMut	FKRP-Mutant	FKRP
5	SO	JJ361	40.37826466666667	FKRPMut	FKRP-Mutant	FKRP
5	SO	JJ366	23.877818	WT	FKRP-Ctrl	FKRP
5	SO	JJ367	40.536702	WT	FKRP-Ctrl	FKRP
5	SO	JJ368	15.479421833333339	WT	FKRP-Ctrl	FKRP
6	SO	JJ021	-26.674842	WT	B4GAT1-Ctrl	B4GAT1
6	SO	JJ022	-20.31569433333334	WT	B4GAT1-Ctrl	B4GAT1
6	SO	JJ023	23.929236666666657	WT	B4GAT1-Ctrl	B4GAT1
6	SO	JJ024	-19.775504666666667	WT	B4GAT1-Ctrl	B4GAT1
6	SO	JJ025	-1.7619903333333298	B4GAT1M155T/M155T	B4GAT1-Mutant	B4GAT1
6	SO	JJ026	-9.236587999999998	B4GAT1M155T/M155T	B4GAT1-Mutant	B4GAT1
6	SO	JJ027	-17.457823333333334	B4GAT1M155T/M155T	B4GAT1-Mutant	B4GAT1
6	SO	JJ028	-6.291347333333334	B4GAT1M155T/M155T	B4GAT1-Mutant	B4GAT1
6	SO	JJ049	37.13773833333334	Emx-Cre+;POMT2F/F	Emx-POMT2-cKO	Emx-POMT2
6	SO	JJ050	27.922887666666657	Emx-Cre+;POMT2F/F	Emx-POMT2-cKO	Emx-POMT2
6	SO	JJ051	50.97078933333332	Emx-Cre+;POMT2F/F	Emx-POMT2-cKO	Emx-POMT2
6	SO	JJ052	46.582177333333334	Emx-Cre+;POMT2F/F	Emx-POMT2-cKO	Emx-POMT2
6	SO	JJ053	-18.30165466666666	Emx-Cre+;POMT2F/+	Emx-POMT2-Ctrl	Emx-POMT2
6	SO	JJ054	55.505334	Emx-Cre+;POMT2F/+	Emx-POMT2-Ctrl	Emx-POMT2
6	SO	JJ055	87.26406000000001	Emx-Cre+;POMT2F/+	Emx-POMT2-Ctrl	Emx-POMT2
6	SO	JJ056	112.92820666666665	Emx-Cre+;POMT2F/+	Emx-POMT2-Ctrl	Emx-POMT2
6	SO	JJ057	-6.0990963333333355	Emx-Cre+;POMT2F/+	Emx-POMT2-Ctrl	Emx-POMT2
6	SO	JJ058	22.420699666666668	Emx-Cre+;POMT2F/+	Emx-POMT2-Ctrl	Emx-POMT2
6	SO	JJ059	27.688976999999994	Emx-Cre+;POMT2F/+	Emx-POMT2-Ctrl	Emx-POMT2
6	SO	JJ060	2.389809000000014	Emx-Cre+;POMT2F/+	Emx-POMT2-Ctrl	Emx-POMT2
6	SO	JJ069	-14.661186333333328	B4GAT1M155T/M155T	B4GAT1-Mutant	B4GAT1
6	SO	JJ070	21.27874299999999	B4GAT1M155T/M155T	B4GAT1-Mutant	B4GAT1
6	SO	JJ071	-21.95179866666665	B4GAT1M155T/M155T	B4GAT1-Mutant	B4GAT1
6	SO	JJ072	3.5328316666666715	B4GAT1M155T/M155T	B4GAT1-Mutant	B4GAT1
6	SO	JJ073	-1.8377103333333338	B4GAT1M155T/M155T	B4GAT1-Mutant	B4GAT1
6	SO	JJ074	-15.320313999999987	B4GAT1M155T/M155T	B4GAT1-Mutant	B4GAT1
6	SO	JJ075	45.21564366666667	B4GAT1M155T/M155T	B4GAT1-Mutant	B4GAT1
6	SO	JJ076	20.95214366666667	B4GAT1M155T/M155T	B4GAT1-Mutant	B4GAT1
6	SO	JJ081	-5.0814316666666555	B4GAT1M155T/M155T	B4GAT1-Mutant	B4GAT1
6	SO	JJ082	26.094364666666667	B4GAT1M155T/M155T	B4GAT1-Mutant	B4GAT1
6	SO	JJ083	19.573163500000007	B4GAT1M155T/M155T	B4GAT1-Mutant	B4GAT1
6	SO	JJ084	54.71713766666665	B4GAT1M155T/M155T	B4GAT1-Mutant	B4GAT1
6	SO	JJ085	27.50151033333333	B4GAT1M155T/M155T	B4GAT1-Mutant	B4GAT1
6	SO	JJ086	4.731218000000003	B4GAT1M155T/M155T	B4GAT1-Mutant	B4GAT1
6	SO	JJ087	56.87866933333334	B4GAT1M155T/M155T	B4GAT1-Mutant	B4GAT1
6	SO	JJ088	8.929098666666667	B4GAT1M155T/M155T	B4GAT1-Mutant	B4GAT1
6	SO	JJ097	11.959614000000007	WT	B4GAT1-Ctrl	B4GAT1
6	SO	JJ098	12.45565133333333	WT	B4GAT1-Ctrl	B4GAT1
6	SO	JJ099	20.14252166666667	WT	B4GAT1-Ctrl	B4GAT1
6	SO	JJ100	23.866564999999998	WT	B4GAT1-Ctrl	B4GAT1
6	SO	JJ105	20.896038333333326	WT	B4GAT1-Ctrl	B4GAT1
6	SO	JJ106	3.4265776666666548	WT	B4GAT1-Ctrl	B4GAT1
6	SO	JJ107	-5.511048666666663	WT	B4GAT1-Ctrl	B4GAT1
6	SO	JJ108	52.98030699999999	WT	B4GAT1-Ctrl	B4GAT1
6	SO	JJ109	52.58750233333334	Emx-Cre+;DGF/-	Emx-DG-cKO	Emx-DG
6	SO	JJ110	32.04107866666666	Emx-Cre+;DGF/-	Emx-DG-cKO	Emx-DG
6	SO	JJ114	14.424918999999994	Emx-Cre+;DGF/-	Emx-DG-cKO	Emx-DG
6	SO	JJ115	25.82177366666667	Emx-Cre+;DGF/-	Emx-DG-cKO	Emx-DG
6	SO	JJ116	15.413342000000005	Emx-Cre+;DGF/-	Emx-DG-cKO	Emx-DG
6	SO	JJ117	5.561151	Emx-Cre+;DGF/-	Emx-DG-cKO	Emx-DG
6	SO	JJ130	24.425545666666668	Emx-Cre+;DGF/+	Emx-DG-Ctrl	Emx-DG
6	SO	JJ131	132.29694333333333	Emx-Cre+;DGF/+	Emx-DG-Ctrl	Emx-DG
6	SO	JJ132	16.46871233333333	Emx-Cre+;DGF/+	Emx-DG-Ctrl	Emx-DG
6	SO	JJ133	76.64052233333334	Emx-Cre+;DGF/+	Emx-DG-Ctrl	Emx-DG
6	SO	JJ146	10.765484999999998	Emx-Cre+;POMT2F/F	Emx-POMT2-cKO	Emx-POMT2
6	SO	JJ147	4.090114	Emx-Cre+;POMT2F/F	Emx-POMT2-cKO	Emx-POMT2
6	SO	JJ148	4.533020999999995	Emx-Cre+;POMT2F/F	Emx-POMT2-cKO	Emx-POMT2
6	SO	JJ149	2.5663383333333294	Emx-Cre+;POMT2F/F	Emx-POMT2-cKO	Emx-POMT2
6	SO	JJ158	0.7897996666666719	Emx-Cre+;POMT2F/+	Emx-POMT2-Ctrl	Emx-POMT2
6	SO	JJ159	-1.3447010000000006	Emx-Cre+;POMT2F/+	Emx-POMT2-Ctrl	Emx-POMT2
6	SO	JJ160	-3.697482666666668	Emx-Cre+;POMT2F/+	Emx-POMT2-Ctrl	Emx-POMT2
6	SO	JJ161	0.7957439999999991	Emx-Cre+;POMT2F/+	Emx-POMT2-Ctrl	Emx-POMT2
6	SO	JJ190	17.898247666666677	Emx-Cre+;DGF/-	Emx-DG-cKO	Emx-DG
6	SO	JJ191	53.53006366666667	Emx-Cre+;DGF/-	Emx-DG-cKO	Emx-DG
6	SO	JJ192	28.143135	Emx-Cre+;DGF/-	Emx-DG-cKO	Emx-DG
6	SO	JJ193	90.16845566666666	Emx-Cre+;DGF/+	Emx-DG-Ctrl	Emx-DG
6	SO	JJ194	41.327348	Emx-Cre+;DGF/+	Emx-DG-Ctrl	Emx-DG
6	SO	JJ195	46.37179233333333	Emx-Cre+;DGF/+	Emx-DG-Ctrl	Emx-DG
6	SO	JJ196	117.73889733333334	Emx-Cre+;DGF/+	Emx-DG-Ctrl	Emx-DG
6	SO	JJ201	5.9020450000000055	Emx-Cre+;DGF/-	Emx-DG-cKO	Emx-DG
6	SO	JJ202	-2.0313146666666646	Emx-Cre+;DGF/-	Emx-DG-cKO	Emx-DG
6	SO	JJ203	6.000919666666671	Emx-Cre+;DGF/-	Emx-DG-cKO	Emx-DG
6	SO	JJ204	18.37778466666666	Emx-Cre+;DGF/-	Emx-DG-cKO	Emx-DG
6	SO	JJ205	17.770660000000007	Emx-Cre+;DGF/+	Emx-DG-Ctrl	Emx-DG
6	SO	JJ206	12.179989333333333	Emx-Cre+;DGF/+	Emx-DG-Ctrl	Emx-DG
6	SO	JJ207	15.415661666666665	Emx-Cre+;DGF/+	Emx-DG-Ctrl	Emx-DG
6	SO	JJ208	-7.302476333333331	Emx-Cre+;DGF/+	Emx-DG-Ctrl	Emx-DG
6	SO	JJ209	13.581200333333342	Emx-Cre+;DGF/+	Emx-DG-Ctrl	Emx-DG
6	SO	JJ210	30.27988733333334	Emx-Cre+;DGF/+	Emx-DG-Ctrl	Emx-DG
6	SO	JJ211	1.7133956666666659	Emx-Cre+;DGF/+	Emx-DG-Ctrl	Emx-DG
6	SO	JJ212	2.3079363333333354	Emx-Cre+;DGF/+	Emx-DG-Ctrl	Emx-DG
6	SO	JJ213	5.09091633333333	Emx-Cre+;DGF/-	Emx-DG-cKO	Emx-DG
6	SO	JJ214	1.9152830000000047	Emx-Cre+;DGF/-	Emx-DG-cKO	Emx-DG
6	SO	JJ215	20.04979966666667	Emx-Cre+;DGF/+	Emx-DG-Ctrl	Emx-DG
6	SO	JJ216	13.61697833333333	Emx-Cre+;DGF/+	Emx-DG-Ctrl	Emx-DG
6	SO	JJ217	12.63183966666667	Emx-Cre+;DGF/+	Emx-DG-Ctrl	Emx-DG
6	SO	JJ218	13.251296000000002	Emx-Cre+;DGF/+	Emx-DG-Ctrl	Emx-DG
6	SO	JJ219	4.8233096666666695	Emx-Cre+;DGF/+	Emx-DG-Ctrl	Emx-DG
6	SO	JJ220	-3.4405886666666654	Emx-Cre+;DGF/+	Emx-DG-Ctrl	Emx-DG
6	SO	JJ221	3.198900999999997	Emx-Cre+;DGF/+	Emx-DG-Ctrl	Emx-DG
6	SO	JJ222	11.679079666666661	Emx-Cre+;DGF/+	Emx-DG-Ctrl	Emx-DG
6	SO	JJ223	17.06712700000001	Emx-Cre+;POMT2F/F	Emx-POMT2-cKO	Emx-POMT2
6	SO	JJ224	7.6103283333333325	Emx-Cre+;POMT2F/F	Emx-POMT2-cKO	Emx-POMT2
6	SO	JJ225	11.987409666666665	Emx-Cre+;POMT2F/F	Emx-POMT2-cKO	Emx-POMT2
6	SO	JJ226	26.142626333333336	Emx-Cre+;POMT2F/F	Emx-POMT2-cKO	Emx-POMT2
6	SO	JJ231	23.84166433333334	Emx-Cre+;POMT2F/+	Emx-POMT2-Ctrl	Emx-POMT2
6	SO	JJ232	9.946385666666666	Emx-Cre+;POMT2F/+	Emx-POMT2-Ctrl	Emx-POMT2
6	SO	JJ233	12.118046666666666	Emx-Cre+;POMT2F/+	Emx-POMT2-Ctrl	Emx-POMT2
6	SO	JJ234	15.65181933333335	Emx-Cre+;POMT2F/+	Emx-POMT2-Ctrl	Emx-POMT2
6	SO	JJ239	91.358569	Emx-Cre+;POMT2F/+	Emx-POMT2-Ctrl	Emx-POMT2
6	SO	JJ240	102.83483733333334	Emx-Cre+;POMT2F/+	Emx-POMT2-Ctrl	Emx-POMT2
6	SO	JJ241	-7.834908666666664	Emx-Cre+;POMT2F/+	Emx-POMT2-Ctrl	Emx-POMT2
6	SO	JJ242	25.948867666666672	Emx-Cre+;POMT2F/+	Emx-POMT2-Ctrl	Emx-POMT2
6	SO	JJ267	-12.290015000000002	FKRPMut	FKRP-Mutant	FKRP
6	SO	JJ268	-7.604374333333335	FKRPMut	FKRP-Mutant	FKRP
6	SO	JJ269	-2.069423333333333	FKRPMut	FKRP-Mutant	FKRP
6	SO	JJ270	-5.765948666666664	FKRPMut	FKRP-Mutant	FKRP
6	SO	JJ271	2.67516533333333	WT	FKRP-Ctrl	FKRP
6	SO	JJ272	9.323028999999996	WT	FKRP-Ctrl	FKRP
6	SO	JJ273	10.152087000000003	WT	FKRP-Ctrl	FKRP
6	SO	JJ274	-0.17709666666666143	WT	FKRP-Ctrl	FKRP
6	SO	JJ275	-4.510209999999996	WT	FKRP-Ctrl	FKRP
6	SO	JJ276	10.969970666666663	WT	FKRP-Ctrl	FKRP
6	SO	JJ277	1.0006036666666678	WT	FKRP-Ctrl	FKRP
6	SO	JJ278	10.09301800000001	WT	FKRP-Ctrl	FKRP
6	SO	JJ279	19.921691	FKRPMut	FKRP-Mutant	FKRP
6	SO	JJ280	19.533605666666674	FKRPMut	FKRP-Mutant	FKRP
6	SO	JJ281	14.930755999999997	FKRPMut	FKRP-Mutant	FKRP
6	SO	JJ282	18.827664	FKRPMut	FKRP-Mutant	FKRP
6	SO	JJ283	18.570702666666662	WT	FKRP-Ctrl	FKRP
6	SO	JJ284	20.571989	WT	FKRP-Ctrl	FKRP
6	SO	JJ285	2.184341999999996	WT	FKRP-Ctrl	FKRP
6	SO	JJ286	55.80975366666667	WT	FKRP-Ctrl	FKRP
6	SO	JJ287	2.1688700000000076	DGdelta/-	ICD-Mutant	ICD
6	SO	JJ288	23.811954666666665	DGdelta/-	ICD-Mutant	ICD
6	SO	JJ289	22.908716666666663	DGdelta/-	ICD-Mutant	ICD
6	SO	JJ290	57.01636933333332	DGdelta/-	ICD-Mutant	ICD
6	SO	JJ295	32.03325966666667	WT	ICD-Ctrl	ICD
6	SO	JJ296	31.071152333333327	WT	ICD-Ctrl	ICD
6	SO	JJ297	25.68822100000001	WT	ICD-Ctrl	ICD
6	SO	JJ298	39.34903666666667	WT	ICD-Ctrl	ICD
6	SO	JJ327	16.88445666666666	DGdelta/-	ICD-Mutant	ICD
6	SO	JJ328	22.71911266666667	DGdelta/-	ICD-Mutant	ICD
6	SO	JJ329	30.357515666666682	DGdelta/-	ICD-Mutant	ICD
6	SO	JJ330	2.4120506666666777	DGdelta/-	ICD-Mutant	ICD
6	SO	JJ335	30.095415333333325	DGdelta/-	ICD-Mutant	ICD
6	SO	JJ336	35.44540800000001	DGdelta/-	ICD-Mutant	ICD
6	SO	JJ337	70.026474	DGdelta/-	ICD-Mutant	ICD
6	SO	JJ338	23.001208666666667	DGdelta/-	ICD-Mutant	ICD
6	SO	JJ343	21.670126333333325	WT	ICD-Ctrl	ICD
6	SO	JJ344	17.873742333333336	WT	ICD-Ctrl	ICD
6	SO	JJ345	27.071658333333335	WT	ICD-Ctrl	ICD
6	SO	JJ346	-2.438981000000003	WT	ICD-Ctrl	ICD
6	SO	JJ351	24.41962866666667	WT	ICD-Ctrl	ICD
6	SO	JJ352	22.802071333333345	WT	ICD-Ctrl	ICD
6	SO	JJ353	1.1117316666666663	WT	ICD-Ctrl	ICD
6	SO	JJ354	19.60614100000001	WT	ICD-Ctrl	ICD
6	SO	JJ359	4.068272366666662	FKRPMut	FKRP-Mutant	FKRP
6	SO	JJ360	18.27960733333333	FKRPMut	FKRP-Mutant	FKRP
6	SO	JJ361	34.13478133333334	FKRPMut	FKRP-Mutant	FKRP
6	SO	JJ366	23.742868	WT	FKRP-Ctrl	FKRP
6	SO	JJ367	39.574418666666666	WT	FKRP-Ctrl	FKRP
6	SO	JJ368	13.881470166666668	WT	FKRP-Ctrl	FKRP
7	SO	JJ021	-23.669508666666662	WT	B4GAT1-Ctrl	B4GAT1
7	SO	JJ022	-22.402361000000003	WT	B4GAT1-Ctrl	B4GAT1
7	SO	JJ023	11.159903333333338	WT	B4GAT1-Ctrl	B4GAT1
7	SO	JJ024	-13.818254666666684	WT	B4GAT1-Ctrl	B4GAT1
7	SO	JJ025	0.09992633333334311	B4GAT1M155T/M155T	B4GAT1-Mutant	B4GAT1
7	SO	JJ026	-12.102171333333331	B4GAT1M155T/M155T	B4GAT1-Mutant	B4GAT1
7	SO	JJ027	-16.303323333333335	B4GAT1M155T/M155T	B4GAT1-Mutant	B4GAT1
7	SO	JJ028	3.8018193333333365	B4GAT1M155T/M155T	B4GAT1-Mutant	B4GAT1
7	SO	JJ049	28.455321666666663	Emx-Cre+;POMT2F/F	Emx-POMT2-cKO	Emx-POMT2
7	SO	JJ050	34.280471	Emx-Cre+;POMT2F/F	Emx-POMT2-cKO	Emx-POMT2
7	SO	JJ051	93.22687266666667	Emx-Cre+;POMT2F/F	Emx-POMT2-cKO	Emx-POMT2
7	SO	JJ052	45.538260666666666	Emx-Cre+;POMT2F/F	Emx-POMT2-cKO	Emx-POMT2
7	SO	JJ053	-15.84823799999999	Emx-Cre+;POMT2F/+	Emx-POMT2-Ctrl	Emx-POMT2
7	SO	JJ054	55.23391733333333	Emx-Cre+;POMT2F/+	Emx-POMT2-Ctrl	Emx-POMT2
7	SO	JJ055	83.18731	Emx-Cre+;POMT2F/+	Emx-POMT2-Ctrl	Emx-POMT2
7	SO	JJ056	121.08337333333334	Emx-Cre+;POMT2F/+	Emx-POMT2-Ctrl	Emx-POMT2
7	SO	JJ057	-4.380179666666673	Emx-Cre+;POMT2F/+	Emx-POMT2-Ctrl	Emx-POMT2
7	SO	JJ058	29.49528300000001	Emx-Cre+;POMT2F/+	Emx-POMT2-Ctrl	Emx-POMT2
7	SO	JJ059	21.050810333333335	Emx-Cre+;POMT2F/+	Emx-POMT2-Ctrl	Emx-POMT2
7	SO	JJ060	18.369809000000014	Emx-Cre+;POMT2F/+	Emx-POMT2-Ctrl	Emx-POMT2
7	SO	JJ069	-2.003019666666669	B4GAT1M155T/M155T	B4GAT1-Mutant	B4GAT1
7	SO	JJ070	28.652492999999993	B4GAT1M155T/M155T	B4GAT1-Mutant	B4GAT1
7	SO	JJ071	-18.86588199999999	B4GAT1M155T/M155T	B4GAT1-Mutant	B4GAT1
7	SO	JJ072	9.744665000000007	B4GAT1M155T/M155T	B4GAT1-Mutant	B4GAT1
7	SO	JJ073	-16.658710333333335	B4GAT1M155T/M155T	B4GAT1-Mutant	B4GAT1
7	SO	JJ074	-13.36381399999999	B4GAT1M155T/M155T	B4GAT1-Mutant	B4GAT1
7	SO	JJ075	54.26064366666666	B4GAT1M155T/M155T	B4GAT1-Mutant	B4GAT1
7	SO	JJ076	40.42781033333333	B4GAT1M155T/M155T	B4GAT1-Mutant	B4GAT1
7	SO	JJ081	-3.9018483333333336	B4GAT1M155T/M155T	B4GAT1-Mutant	B4GAT1
7	SO	JJ082	12.299697999999992	B4GAT1M155T/M155T	B4GAT1-Mutant	B4GAT1
7	SO	JJ083	-4.756586500000012	B4GAT1M155T/M155T	B4GAT1-Mutant	B4GAT1
7	SO	JJ084	48.46763766666666	B4GAT1M155T/M155T	B4GAT1-Mutant	B4GAT1
7	SO	JJ085	22.879093666666666	B4GAT1M155T/M155T	B4GAT1-Mutant	B4GAT1
7	SO	JJ086	21.78946800000001	B4GAT1M155T/M155T	B4GAT1-Mutant	B4GAT1
7	SO	JJ087	63.96483600000001	B4GAT1M155T/M155T	B4GAT1-Mutant	B4GAT1
7	SO	JJ088	4.008181999999991	B4GAT1M155T/M155T	B4GAT1-Mutant	B4GAT1
7	SO	JJ097	14.658614	WT	B4GAT1-Ctrl	B4GAT1
7	SO	JJ098	8.012984666666673	WT	B4GAT1-Ctrl	B4GAT1
7	SO	JJ099	30.44893833333334	WT	B4GAT1-Ctrl	B4GAT1
7	SO	JJ100	43.16473166666666	WT	B4GAT1-Ctrl	B4GAT1
7	SO	JJ105	40.95903833333333	WT	B4GAT1-Ctrl	B4GAT1
7	SO	JJ106	0.6266609999999938	WT	B4GAT1-Ctrl	B4GAT1
7	SO	JJ107	13.75978466666667	WT	B4GAT1-Ctrl	B4GAT1
7	SO	JJ108	72.06864033333333	WT	B4GAT1-Ctrl	B4GAT1
7	SO	JJ109	43.01608566666667	Emx-Cre+;DGF/-	Emx-DG-cKO	Emx-DG
7	SO	JJ110	34.576662	Emx-Cre+;DGF/-	Emx-DG-cKO	Emx-DG
7	SO	JJ114	14.274918999999992	Emx-Cre+;DGF/-	Emx-DG-cKO	Emx-DG
7	SO	JJ115	21.579106999999997	Emx-Cre+;DGF/-	Emx-DG-cKO	Emx-DG
7	SO	JJ116	13.392925333333332	Emx-Cre+;DGF/-	Emx-DG-cKO	Emx-DG
7	SO	JJ117	8.475567666666668	Emx-Cre+;DGF/-	Emx-DG-cKO	Emx-DG
7	SO	JJ130	30.166712333333333	Emx-Cre+;DGF/+	Emx-DG-Ctrl	Emx-DG
7	SO	JJ131	105.65944333333334	Emx-Cre+;DGF/+	Emx-DG-Ctrl	Emx-DG
7	SO	JJ132	18.33221233333333	Emx-Cre+;DGF/+	Emx-DG-Ctrl	Emx-DG
7	SO	JJ133	57.25010566666666	Emx-Cre+;DGF/+	Emx-DG-Ctrl	Emx-DG
7	SO	JJ146	9.553901666666667	Emx-Cre+;POMT2F/F	Emx-POMT2-cKO	Emx-POMT2
7	SO	JJ147	3.501364	Emx-Cre+;POMT2F/F	Emx-POMT2-cKO	Emx-POMT2
7	SO	JJ148	13.268854333333328	Emx-Cre+;POMT2F/F	Emx-POMT2-cKO	Emx-POMT2
7	SO	JJ149	-1.3654116666666691	Emx-Cre+;POMT2F/F	Emx-POMT2-cKO	Emx-POMT2
7	SO	JJ158	6.838049666666677	Emx-Cre+;POMT2F/+	Emx-POMT2-Ctrl	Emx-POMT2
7	SO	JJ159	11.231215666666662	Emx-Cre+;POMT2F/+	Emx-POMT2-Ctrl	Emx-POMT2
7	SO	JJ160	-2.6211493333333302	Emx-Cre+;POMT2F/+	Emx-POMT2-Ctrl	Emx-POMT2
7	SO	JJ161	2.0340773333333337	Emx-Cre+;POMT2F/+	Emx-POMT2-Ctrl	Emx-POMT2
7	SO	JJ190	12.931747666666672	Emx-Cre+;DGF/-	Emx-DG-cKO	Emx-DG
7	SO	JJ191	56.431897	Emx-Cre+;DGF/-	Emx-DG-cKO	Emx-DG
7	SO	JJ192	28.709968333333336	Emx-Cre+;DGF/-	Emx-DG-cKO	Emx-DG
7	SO	JJ193	79.86387233333333	Emx-Cre+;DGF/+	Emx-DG-Ctrl	Emx-DG
7	SO	JJ194	47.233931333333324	Emx-Cre+;DGF/+	Emx-DG-Ctrl	Emx-DG
7	SO	JJ195	53.65379233333332	Emx-Cre+;DGF/+	Emx-DG-Ctrl	Emx-DG
7	SO	JJ196	124.83389733333335	Emx-Cre+;DGF/+	Emx-DG-Ctrl	Emx-DG
7	SO	JJ201	5.332961666666667	Emx-Cre+;DGF/-	Emx-DG-cKO	Emx-DG
7	SO	JJ202	-1.692647999999996	Emx-Cre+;DGF/-	Emx-DG-cKO	Emx-DG
7	SO	JJ203	4.475502999999999	Emx-Cre+;DGF/-	Emx-DG-cKO	Emx-DG
7	SO	JJ204	20.042867999999995	Emx-Cre+;DGF/-	Emx-DG-cKO	Emx-DG
7	SO	JJ205	19.364910000000005	Emx-Cre+;DGF/+	Emx-DG-Ctrl	Emx-DG
7	SO	JJ206	13.015072666666663	Emx-Cre+;DGF/+	Emx-DG-Ctrl	Emx-DG
7	SO	JJ207	16.778328333333334	Emx-Cre+;DGF/+	Emx-DG-Ctrl	Emx-DG
7	SO	JJ208	1.282273666666666	Emx-Cre+;DGF/+	Emx-DG-Ctrl	Emx-DG
7	SO	JJ209	14.76795033333334	Emx-Cre+;DGF/+	Emx-DG-Ctrl	Emx-DG
7	SO	JJ210	23.829387333333326	Emx-Cre+;DGF/+	Emx-DG-Ctrl	Emx-DG
7	SO	JJ211	2.532562333333336	Emx-Cre+;DGF/+	Emx-DG-Ctrl	Emx-DG
7	SO	JJ212	4.004936333333333	Emx-Cre+;DGF/+	Emx-DG-Ctrl	Emx-DG
7	SO	JJ213	4.961499666666666	Emx-Cre+;DGF/-	Emx-DG-cKO	Emx-DG
7	SO	JJ214	1.8596163333333326	Emx-Cre+;DGF/-	Emx-DG-cKO	Emx-DG
7	SO	JJ215	20.792133000000003	Emx-Cre+;DGF/+	Emx-DG-Ctrl	Emx-DG
7	SO	JJ216	9.88256166666666	Emx-Cre+;DGF/+	Emx-DG-Ctrl	Emx-DG
7	SO	JJ217	12.439089666666666	Emx-Cre+;DGF/+	Emx-DG-Ctrl	Emx-DG
7	SO	JJ218	14.297212666666667	Emx-Cre+;DGF/+	Emx-DG-Ctrl	Emx-DG
7	SO	JJ219	1.2211429999999979	Emx-Cre+;DGF/+	Emx-DG-Ctrl	Emx-DG
7	SO	JJ220	-4.733422	Emx-Cre+;DGF/+	Emx-DG-Ctrl	Emx-DG
7	SO	JJ221	2.725567666666663	Emx-Cre+;DGF/+	Emx-DG-Ctrl	Emx-DG
7	SO	JJ222	12.560162999999998	Emx-Cre+;DGF/+	Emx-DG-Ctrl	Emx-DG
7	SO	JJ223	11.892543666666674	Emx-Cre+;POMT2F/F	Emx-POMT2-cKO	Emx-POMT2
7	SO	JJ224	10.551244999999989	Emx-Cre+;POMT2F/F	Emx-POMT2-cKO	Emx-POMT2
7	SO	JJ225	14.084909666666666	Emx-Cre+;POMT2F/F	Emx-POMT2-cKO	Emx-POMT2
7	SO	JJ226	39.569043	Emx-Cre+;POMT2F/F	Emx-POMT2-cKO	Emx-POMT2
7	SO	JJ231	32.867331	Emx-Cre+;POMT2F/+	Emx-POMT2-Ctrl	Emx-POMT2
7	SO	JJ232	12.647552333333332	Emx-Cre+;POMT2F/+	Emx-POMT2-Ctrl	Emx-POMT2
7	SO	JJ233	6.290463333333331	Emx-Cre+;POMT2F/+	Emx-POMT2-Ctrl	Emx-POMT2
7	SO	JJ234	18.829069333333337	Emx-Cre+;POMT2F/+	Emx-POMT2-Ctrl	Emx-POMT2
7	SO	JJ239	99.59465233333334	Emx-Cre+;POMT2F/+	Emx-POMT2-Ctrl	Emx-POMT2
7	SO	JJ240	136.78867066666666	Emx-Cre+;POMT2F/+	Emx-POMT2-Ctrl	Emx-POMT2
7	SO	JJ241	-3.903658666666672	Emx-Cre+;POMT2F/+	Emx-POMT2-Ctrl	Emx-POMT2
7	SO	JJ242	25.21745100000001	Emx-Cre+;POMT2F/+	Emx-POMT2-Ctrl	Emx-POMT2
7	SO	JJ267	-8.05918166666667	FKRPMut	FKRP-Mutant	FKRP
7	SO	JJ268	-2.8252909999999978	FKRPMut	FKRP-Mutant	FKRP
7	SO	JJ269	1.5934933333333323	FKRPMut	FKRP-Mutant	FKRP
7	SO	JJ270	-4.858948666666663	FKRPMut	FKRP-Mutant	FKRP
7	SO	JJ271	-0.82383466666667	WT	FKRP-Ctrl	FKRP
7	SO	JJ272	11.384612333333331	WT	FKRP-Ctrl	FKRP
7	SO	JJ273	11.327337000000005	WT	FKRP-Ctrl	FKRP
7	SO	JJ274	0.9554866666666726	WT	FKRP-Ctrl	FKRP
7	SO	JJ275	4.427540000000003	WT	FKRP-Ctrl	FKRP
7	SO	JJ276	6.363053999999987	WT	FKRP-Ctrl	FKRP
7	SO	JJ277	-0.21806300000000078	WT	FKRP-Ctrl	FKRP
7	SO	JJ278	11.969351333333341	WT	FKRP-Ctrl	FKRP
7	SO	JJ279	25.559690999999997	FKRPMut	FKRP-Mutant	FKRP
7	SO	JJ280	26.214939	FKRPMut	FKRP-Mutant	FKRP
7	SO	JJ281	20.18758933333333	FKRPMut	FKRP-Mutant	FKRP
7	SO	JJ282	20.87608066666667	FKRPMut	FKRP-Mutant	FKRP
7	SO	JJ283	16.10095266666666	WT	FKRP-Ctrl	FKRP
7	SO	JJ284	24.226072333333335	WT	FKRP-Ctrl	FKRP
7	SO	JJ285	6.772592000000003	WT	FKRP-Ctrl	FKRP
7	SO	JJ286	50.26925366666667	WT	FKRP-Ctrl	FKRP
7	SO	JJ287	10.511370000000008	DGdelta/-	ICD-Mutant	ICD
7	SO	JJ288	32.51512133333334	DGdelta/-	ICD-Mutant	ICD
7	SO	JJ289	24.755383333333327	DGdelta/-	ICD-Mutant	ICD
7	SO	JJ290	43.57786933333333	DGdelta/-	ICD-Mutant	ICD
7	SO	JJ295	30.021426333333324	WT	ICD-Ctrl	ICD
7	SO	JJ296	20.579568999999992	WT	ICD-Ctrl	ICD
7	SO	JJ297	23.13405433333334	WT	ICD-Ctrl	ICD
7	SO	JJ298	37.90920333333333	WT	ICD-Ctrl	ICD
7	SO	JJ327	19.493789999999994	DGdelta/-	ICD-Mutant	ICD
7	SO	JJ328	18.144112666666672	DGdelta/-	ICD-Mutant	ICD
7	SO	JJ329	37.006848999999995	DGdelta/-	ICD-Mutant	ICD
7	SO	JJ330	2.1122173333333287	DGdelta/-	ICD-Mutant	ICD
7	SO	JJ335	39.16849866666667	DGdelta/-	ICD-Mutant	ICD
7	SO	JJ336	29.315408	DGdelta/-	ICD-Mutant	ICD
7	SO	JJ337	71.15139066666667	DGdelta/-	ICD-Mutant	ICD
7	SO	JJ338	31.407791999999997	DGdelta/-	ICD-Mutant	ICD
7	SO	JJ343	23.382293000000004	WT	ICD-Ctrl	ICD
7	SO	JJ344	17.93107566666667	WT	ICD-Ctrl	ICD
7	SO	JJ345	20.480991666666664	WT	ICD-Ctrl	ICD
7	SO	JJ346	-2.1545643333333353	WT	ICD-Ctrl	ICD
7	SO	JJ351	19.128712000000007	WT	ICD-Ctrl	ICD
7	SO	JJ352	22.642571333333326	WT	ICD-Ctrl	ICD
7	SO	JJ353	2.649148333333334	WT	ICD-Ctrl	ICD
7	SO	JJ354	16.886391000000007	WT	ICD-Ctrl	ICD
7	SO	JJ359	5.418105699999998	FKRPMut	FKRP-Mutant	FKRP
7	SO	JJ360	25.47877399999999	FKRPMut	FKRP-Mutant	FKRP
7	SO	JJ361	36.24328133333333	FKRPMut	FKRP-Mutant	FKRP
7	SO	JJ366	20.33153466666666	WT	FKRP-Ctrl	FKRP
7	SO	JJ367	39.684502	WT	FKRP-Ctrl	FKRP
7	SO	JJ368	14.045295166666671	WT	FKRP-Ctrl	FKRP
8	SO	JJ021	-10.263175333333331	WT	B4GAT1-Ctrl	B4GAT1
8	SO	JJ022	-20.26152766666667	WT	B4GAT1-Ctrl	B4GAT1
8	SO	JJ023	-4.453813333333339	WT	B4GAT1-Ctrl	B4GAT1
8	SO	JJ024	-8.926204666666672	WT	B4GAT1-Ctrl	B4GAT1
8	SO	JJ025	-6.0371236666666634	B4GAT1M155T/M155T	B4GAT1-Mutant	B4GAT1
8	SO	JJ026	-12.95135466666666	B4GAT1M155T/M155T	B4GAT1-Mutant	B4GAT1
8	SO	JJ027	-16.723456666666664	B4GAT1M155T/M155T	B4GAT1-Mutant	B4GAT1
8	SO	JJ028	-2.0650306666666722	B4GAT1M155T/M155T	B4GAT1-Mutant	B4GAT1
8	SO	JJ049	29.50832166666666	Emx-Cre+;POMT2F/F	Emx-POMT2-cKO	Emx-POMT2
8	SO	JJ050	45.89467099999999	Emx-Cre+;POMT2F/F	Emx-POMT2-cKO	Emx-POMT2
8	SO	JJ051	77.80627266666666	Emx-Cre+;POMT2F/F	Emx-POMT2-cKO	Emx-POMT2
8	SO	JJ052	44.520094	Emx-Cre+;POMT2F/F	Emx-POMT2-cKO	Emx-POMT2
8	SO	JJ053	-1.735871333333326	Emx-Cre+;POMT2F/+	Emx-POMT2-Ctrl	Emx-POMT2
8	SO	JJ054	33.35706733333333	Emx-Cre+;POMT2F/+	Emx-POMT2-Ctrl	Emx-POMT2
8	SO	JJ055	69.94272666666669	Emx-Cre+;POMT2F/+	Emx-POMT2-Ctrl	Emx-POMT2
8	SO	JJ056	133.20729	Emx-Cre+;POMT2F/+	Emx-POMT2-Ctrl	Emx-POMT2
8	SO	JJ057	-3.516479666666669	Emx-Cre+;POMT2F/+	Emx-POMT2-Ctrl	Emx-POMT2
8	SO	JJ058	29.489766333333346	Emx-Cre+;POMT2F/+	Emx-POMT2-Ctrl	Emx-POMT2
8	SO	JJ059	25.20436033333334	Emx-Cre+;POMT2F/+	Emx-POMT2-Ctrl	Emx-POMT2
8	SO	JJ060	43.65229233333332	Emx-Cre+;POMT2F/+	Emx-POMT2-Ctrl	Emx-POMT2
8	SO	JJ069	2.821596999999997	B4GAT1M155T/M155T	B4GAT1-Mutant	B4GAT1
8	SO	JJ070	10.364542999999998	B4GAT1M155T/M155T	B4GAT1-Mutant	B4GAT1
8	SO	JJ071	-16.691231999999996	B4GAT1M155T/M155T	B4GAT1-Mutant	B4GAT1
8	SO	JJ072	-10.041801666666672	B4GAT1M155T/M155T	B4GAT1-Mutant	B4GAT1
8	SO	JJ073	-16.886677000000006	B4GAT1M155T/M155T	B4GAT1-Mutant	B4GAT1
8	SO	JJ074	-10.038480666666658	B4GAT1M155T/M155T	B4GAT1-Mutant	B4GAT1
8	SO	JJ075	80.87649366666669	B4GAT1M155T/M155T	B4GAT1-Mutant	B4GAT1
8	SO	JJ076	51.557110333333334	B4GAT1M155T/M155T	B4GAT1-Mutant	B4GAT1
8	SO	JJ081	-3.7916816666666713	B4GAT1M155T/M155T	B4GAT1-Mutant	B4GAT1
8	SO	JJ082	19.568281333333328	B4GAT1M155T/M155T	B4GAT1-Mutant	B4GAT1
8	SO	JJ083	-2.1182364999999947	B4GAT1M155T/M155T	B4GAT1-Mutant	B4GAT1
8	SO	JJ084	42.40533766666667	B4GAT1M155T/M155T	B4GAT1-Mutant	B4GAT1
8	SO	JJ085	29.601093666666674	B4GAT1M155T/M155T	B4GAT1-Mutant	B4GAT1
8	SO	JJ086	44.606068	B4GAT1M155T/M155T	B4GAT1-Mutant	B4GAT1
8	SO	JJ087	49.65373600000001	B4GAT1M155T/M155T	B4GAT1-Mutant	B4GAT1
8	SO	JJ088	11.647848666666667	B4GAT1M155T/M155T	B4GAT1-Mutant	B4GAT1
8	SO	JJ097	11.32886400000001	WT	B4GAT1-Ctrl	B4GAT1
8	SO	JJ098	-8.161398666666656	WT	B4GAT1-Ctrl	B4GAT1
8	SO	JJ099	39.85947166666667	WT	B4GAT1-Ctrl	B4GAT1
8	SO	JJ100	23.699815	WT	B4GAT1-Ctrl	B4GAT1
8	SO	JJ105	68.09567166666666	WT	B4GAT1-Ctrl	B4GAT1
8	SO	JJ106	-13.687589000000003	WT	B4GAT1-Ctrl	B4GAT1
8	SO	JJ107	-2.2005153333333283	WT	B4GAT1-Ctrl	B4GAT1
8	SO	JJ108	138.40695700000003	WT	B4GAT1-Ctrl	B4GAT1
8	SO	JJ109	34.01005233333334	Emx-Cre+;DGF/-	Emx-DG-cKO	Emx-DG
8	SO	JJ110	47.72359533333333	Emx-Cre+;DGF/-	Emx-DG-cKO	Emx-DG
8	SO	JJ114	18.950669	Emx-Cre+;DGF/-	Emx-DG-cKO	Emx-DG
8	SO	JJ115	14.788590333333332	Emx-Cre+;DGF/-	Emx-DG-cKO	Emx-DG
8	SO	JJ116	5.159891999999999	Emx-Cre+;DGF/-	Emx-DG-cKO	Emx-DG
8	SO	JJ117	11.646517666666673	Emx-Cre+;DGF/-	Emx-DG-cKO	Emx-DG
8	SO	JJ130	26.057829	Emx-Cre+;DGF/+	Emx-DG-Ctrl	Emx-DG
8	SO	JJ131	95.48372666666666	Emx-Cre+;DGF/+	Emx-DG-Ctrl	Emx-DG
8	SO	JJ132	24.051795666666667	Emx-Cre+;DGF/+	Emx-DG-Ctrl	Emx-DG
8	SO	JJ133	52.158289	Emx-Cre+;DGF/+	Emx-DG-Ctrl	Emx-DG
8	SO	JJ146	9.061235000000002	Emx-Cre+;POMT2F/F	Emx-POMT2-cKO	Emx-POMT2
8	SO	JJ147	-0.8820026666666697	Emx-Cre+;POMT2F/F	Emx-POMT2-cKO	Emx-POMT2
8	SO	JJ148	11.086704333333325	Emx-Cre+;POMT2F/F	Emx-POMT2-cKO	Emx-POMT2
8	SO	JJ149	5.593271666666671	Emx-Cre+;POMT2F/F	Emx-POMT2-cKO	Emx-POMT2
8	SO	JJ158	8.656683000000006	Emx-Cre+;POMT2F/+	Emx-POMT2-Ctrl	Emx-POMT2
8	SO	JJ159	8.471832333333333	Emx-Cre+;POMT2F/+	Emx-POMT2-Ctrl	Emx-POMT2
8	SO	JJ160	-0.15758266666666523	Emx-Cre+;POMT2F/+	Emx-POMT2-Ctrl	Emx-POMT2
8	SO	JJ161	5.1403106666666645	Emx-Cre+;POMT2F/+	Emx-POMT2-Ctrl	Emx-POMT2
8	SO	JJ190	15.890714333333335	Emx-Cre+;DGF/-	Emx-DG-cKO	Emx-DG
8	SO	JJ191	88.73394699999999	Emx-Cre+;DGF/-	Emx-DG-cKO	Emx-DG
8	SO	JJ192	28.289284999999996	Emx-Cre+;DGF/-	Emx-DG-cKO	Emx-DG
8	SO	JJ193	71.68680566666666	Emx-Cre+;DGF/+	Emx-DG-Ctrl	Emx-DG
8	SO	JJ194	49.99566466666666	Emx-Cre+;DGF/+	Emx-DG-Ctrl	Emx-DG
8	SO	JJ195	66.31832566666667	Emx-Cre+;DGF/+	Emx-DG-Ctrl	Emx-DG
8	SO	JJ196	117.980814	Emx-Cre+;DGF/+	Emx-DG-Ctrl	Emx-DG
8	SO	JJ201	6.354178333333333	Emx-Cre+;DGF/-	Emx-DG-cKO	Emx-DG
8	SO	JJ202	0.8761186666666703	Emx-Cre+;DGF/-	Emx-DG-cKO	Emx-DG
8	SO	JJ203	6.7324363333333395	Emx-Cre+;DGF/-	Emx-DG-cKO	Emx-DG
8	SO	JJ204	23.027751333333327	Emx-Cre+;DGF/-	Emx-DG-cKO	Emx-DG
8	SO	JJ205	18.10447666666667	Emx-Cre+;DGF/+	Emx-DG-Ctrl	Emx-DG
8	SO	JJ206	12.632022666666671	Emx-Cre+;DGF/+	Emx-DG-Ctrl	Emx-DG
8	SO	JJ207	17.476294999999997	Emx-Cre+;DGF/+	Emx-DG-Ctrl	Emx-DG
8	SO	JJ208	7.961723666666664	Emx-Cre+;DGF/+	Emx-DG-Ctrl	Emx-DG
8	SO	JJ209	19.396533666666667	Emx-Cre+;DGF/+	Emx-DG-Ctrl	Emx-DG
8	SO	JJ210	23.148103999999993	Emx-Cre+;DGF/+	Emx-DG-Ctrl	Emx-DG
8	SO	JJ211	4.548728999999999	Emx-Cre+;DGF/+	Emx-DG-Ctrl	Emx-DG
8	SO	JJ212	9.80086966666667	Emx-Cre+;DGF/+	Emx-DG-Ctrl	Emx-DG
8	SO	JJ213	5.091682999999999	Emx-Cre+;DGF/-	Emx-DG-cKO	Emx-DG
8	SO	JJ214	2.005383000000002	Emx-Cre+;DGF/-	Emx-DG-cKO	Emx-DG
8	SO	JJ215	20.101299666666662	Emx-Cre+;DGF/+	Emx-DG-Ctrl	Emx-DG
8	SO	JJ216	10.78706166666666	Emx-Cre+;DGF/+	Emx-DG-Ctrl	Emx-DG
8	SO	JJ217	11.636972999999998	Emx-Cre+;DGF/+	Emx-DG-Ctrl	Emx-DG
8	SO	JJ218	16.38992933333333	Emx-Cre+;DGF/+	Emx-DG-Ctrl	Emx-DG
8	SO	JJ219	1.5310763333333313	Emx-Cre+;DGF/+	Emx-DG-Ctrl	Emx-DG
8	SO	JJ220	-3.722271999999999	Emx-Cre+;DGF/+	Emx-DG-Ctrl	Emx-DG
8	SO	JJ221	2.5498343333333366	Emx-Cre+;DGF/+	Emx-DG-Ctrl	Emx-DG
8	SO	JJ222	13.817712999999998	Emx-Cre+;DGF/+	Emx-DG-Ctrl	Emx-DG
8	SO	JJ223	26.81424366666666	Emx-Cre+;POMT2F/F	Emx-POMT2-cKO	Emx-POMT2
8	SO	JJ224	-0.1940549999999964	Emx-Cre+;POMT2F/F	Emx-POMT2-cKO	Emx-POMT2
8	SO	JJ225	2.2526596666666685	Emx-Cre+;POMT2F/F	Emx-POMT2-cKO	Emx-POMT2
8	SO	JJ226	38.34402633333334	Emx-Cre+;POMT2F/F	Emx-POMT2-cKO	Emx-POMT2
8	SO	JJ231	45.09151433333334	Emx-Cre+;POMT2F/+	Emx-POMT2-Ctrl	Emx-POMT2
8	SO	JJ232	11.809285666666668	Emx-Cre+;POMT2F/+	Emx-POMT2-Ctrl	Emx-POMT2
8	SO	JJ233	4.778663333333327	Emx-Cre+;POMT2F/+	Emx-POMT2-Ctrl	Emx-POMT2
8	SO	JJ234	18.42756933333335	Emx-Cre+;POMT2F/+	Emx-POMT2-Ctrl	Emx-POMT2
8	SO	JJ239	101.04655233333334	Emx-Cre+;POMT2F/+	Emx-POMT2-Ctrl	Emx-POMT2
8	SO	JJ240	113.46117066666667	Emx-Cre+;POMT2F/+	Emx-POMT2-Ctrl	Emx-POMT2
8	SO	JJ241	-4.869175333333331	Emx-Cre+;POMT2F/+	Emx-POMT2-Ctrl	Emx-POMT2
8	SO	JJ242	32.213767666666676	Emx-Cre+;POMT2F/+	Emx-POMT2-Ctrl	Emx-POMT2
8	SO	JJ267	-10.806131666666667	FKRPMut	FKRP-Mutant	FKRP
8	SO	JJ268	-2.026324333333335	FKRPMut	FKRP-Mutant	FKRP
8	SO	JJ269	4.461093333333333	FKRPMut	FKRP-Mutant	FKRP
8	SO	JJ270	-2.572265333333334	FKRPMut	FKRP-Mutant	FKRP
8	SO	JJ271	0.48899866666666486	WT	FKRP-Ctrl	FKRP
8	SO	JJ272	12.429562333333331	WT	FKRP-Ctrl	FKRP
8	SO	JJ273	6.384620333333335	WT	FKRP-Ctrl	FKRP
8	SO	JJ274	0.31782000000000227	WT	FKRP-Ctrl	FKRP
8	SO	JJ275	4.004523333333334	WT	FKRP-Ctrl	FKRP
8	SO	JJ276	8.565603999999999	WT	FKRP-Ctrl	FKRP
8	SO	JJ277	2.2355036666666734	WT	FKRP-Ctrl	FKRP
8	SO	JJ278	13.555201333333335	WT	FKRP-Ctrl	FKRP
8	SO	JJ279	27.704357666666667	FKRPMut	FKRP-Mutant	FKRP
8	SO	JJ280	31.82660566666667	FKRPMut	FKRP-Mutant	FKRP
8	SO	JJ281	14.924322666666663	FKRPMut	FKRP-Mutant	FKRP
8	SO	JJ282	22.03064733333333	FKRPMut	FKRP-Mutant	FKRP
8	SO	JJ283	22.54105266666667	WT	FKRP-Ctrl	FKRP
8	SO	JJ284	23.432472333333337	WT	FKRP-Ctrl	FKRP
8	SO	JJ285	3.2934920000000005	WT	FKRP-Ctrl	FKRP
8	SO	JJ286	47.52515366666667	WT	FKRP-Ctrl	FKRP
8	SO	JJ287	30.06678666666667	DGdelta/-	ICD-Mutant	ICD
8	SO	JJ288	29.698904666666664	DGdelta/-	ICD-Mutant	ICD
8	SO	JJ289	24.878100000000003	DGdelta/-	ICD-Mutant	ICD
8	SO	JJ290	42.29740266666668	DGdelta/-	ICD-Mutant	ICD
8	SO	JJ295	45.64217633333333	WT	ICD-Ctrl	ICD
8	SO	JJ296	20.211269000000005	WT	ICD-Ctrl	ICD
8	SO	JJ297	22.276571000000008	WT	ICD-Ctrl	ICD
8	SO	JJ298	35.73632	WT	ICD-Ctrl	ICD
8	SO	JJ327	19.39229	DGdelta/-	ICD-Mutant	ICD
8	SO	JJ328	25.107146	DGdelta/-	ICD-Mutant	ICD
8	SO	JJ329	41.117049	DGdelta/-	ICD-Mutant	ICD
8	SO	JJ330	-1.9126993333333313	DGdelta/-	ICD-Mutant	ICD
8	SO	JJ335	42.58719866666667	DGdelta/-	ICD-Mutant	ICD
8	SO	JJ336	45.98767466666667	DGdelta/-	ICD-Mutant	ICD
8	SO	JJ337	63.57739066666667	DGdelta/-	ICD-Mutant	ICD
8	SO	JJ338	34.49705866666667	DGdelta/-	ICD-Mutant	ICD
8	SO	JJ343	24.484992999999992	WT	ICD-Ctrl	ICD
8	SO	JJ344	21.27817566666666	WT	ICD-Ctrl	ICD
8	SO	JJ345	18.87019166666666	WT	ICD-Ctrl	ICD
8	SO	JJ346	0.3296856666666675	WT	ICD-Ctrl	ICD
8	SO	JJ351	15.538778666666673	WT	ICD-Ctrl	ICD
8	SO	JJ352	28.079888	WT	ICD-Ctrl	ICD
8	SO	JJ353	7.560831666666672	WT	ICD-Ctrl	ICD
8	SO	JJ354	13.740440999999999	WT	ICD-Ctrl	ICD
8	SO	JJ359	4.256465700000002	FKRPMut	FKRP-Mutant	FKRP
8	SO	JJ360	17.197974000000002	FKRPMut	FKRP-Mutant	FKRP
8	SO	JJ361	35.978198	FKRPMut	FKRP-Mutant	FKRP
8	SO	JJ366	21.207618000000007	WT	FKRP-Ctrl	FKRP
8	SO	JJ367	38.76343533333334	WT	FKRP-Ctrl	FKRP
8	SO	JJ368	15.624488499999998	WT	FKRP-Ctrl	FKRP
9	SO	JJ021	-12.197341999999992	WT	B4GAT1-Ctrl	B4GAT1
9	SO	JJ022	-7.871777666666674	WT	B4GAT1-Ctrl	B4GAT1
9	SO	JJ023	1.1382366666666617	WT	B4GAT1-Ctrl	B4GAT1
9	SO	JJ024	-4.131004666666674	WT	B4GAT1-Ctrl	B4GAT1
9	SO	JJ025	-3.466656999999998	B4GAT1M155T/M155T	B4GAT1-Mutant	B4GAT1
9	SO	JJ026	-12.61375466666666	B4GAT1M155T/M155T	B4GAT1-Mutant	B4GAT1
9	SO	JJ027	-11.245240000000004	B4GAT1M155T/M155T	B4GAT1-Mutant	B4GAT1
9	SO	JJ028	-6.7930973333333355	B4GAT1M155T/M155T	B4GAT1-Mutant	B4GAT1
9	SO	JJ049	31.383071666666666	Emx-Cre+;POMT2F/F	Emx-POMT2-cKO	Emx-POMT2
9	SO	JJ050	41.800971000000004	Emx-Cre+;POMT2F/F	Emx-POMT2-cKO	Emx-POMT2
9	SO	JJ051	61.318122666666675	Emx-Cre+;POMT2F/F	Emx-POMT2-cKO	Emx-POMT2
9	SO	JJ052	48.81401066666668	Emx-Cre+;POMT2F/F	Emx-POMT2-cKO	Emx-POMT2
9	SO	JJ053	7.722761999999999	Emx-Cre+;POMT2F/+	Emx-POMT2-Ctrl	Emx-POMT2
9	SO	JJ054	18.007500666666676	Emx-Cre+;POMT2F/+	Emx-POMT2-Ctrl	Emx-POMT2
9	SO	JJ055	78.70739333333333	Emx-Cre+;POMT2F/+	Emx-POMT2-Ctrl	Emx-POMT2
9	SO	JJ056	121.64354000000002	Emx-Cre+;POMT2F/+	Emx-POMT2-Ctrl	Emx-POMT2
9	SO	JJ057	-11.095096333333336	Emx-Cre+;POMT2F/+	Emx-POMT2-Ctrl	Emx-POMT2
9	SO	JJ058	34.411283000000005	Emx-Cre+;POMT2F/+	Emx-POMT2-Ctrl	Emx-POMT2
9	SO	JJ059	25.822060333333337	Emx-Cre+;POMT2F/+	Emx-POMT2-Ctrl	Emx-POMT2
9	SO	JJ060	47.771975666666656	Emx-Cre+;POMT2F/+	Emx-POMT2-Ctrl	Emx-POMT2
9	SO	JJ069	-4.556436333333333	B4GAT1M155T/M155T	B4GAT1-Mutant	B4GAT1
9	SO	JJ070	17.873576333333336	B4GAT1M155T/M155T	B4GAT1-Mutant	B4GAT1
9	SO	JJ071	-7.589631999999995	B4GAT1M155T/M155T	B4GAT1-Mutant	B4GAT1
9	SO	JJ072	-3.8662516666666655	B4GAT1M155T/M155T	B4GAT1-Mutant	B4GAT1
9	SO	JJ073	-4.102543666666672	B4GAT1M155T/M155T	B4GAT1-Mutant	B4GAT1
9	SO	JJ074	-3.4194806666666673	B4GAT1M155T/M155T	B4GAT1-Mutant	B4GAT1
9	SO	JJ075	85.791977	B4GAT1M155T/M155T	B4GAT1-Mutant	B4GAT1
9	SO	JJ076	36.41806033333334	B4GAT1M155T/M155T	B4GAT1-Mutant	B4GAT1
9	SO	JJ081	0.9658183333333312	B4GAT1M155T/M155T	B4GAT1-Mutant	B4GAT1
9	SO	JJ082	41.16853133333333	B4GAT1M155T/M155T	B4GAT1-Mutant	B4GAT1
9	SO	JJ083	15.330788499999997	B4GAT1M155T/M155T	B4GAT1-Mutant	B4GAT1
9	SO	JJ084	63.586887666666655	B4GAT1M155T/M155T	B4GAT1-Mutant	B4GAT1
9	SO	JJ085	32.97567700000001	B4GAT1M155T/M155T	B4GAT1-Mutant	B4GAT1
9	SO	JJ086	19.54038466666667	B4GAT1M155T/M155T	B4GAT1-Mutant	B4GAT1
9	SO	JJ087	32.034919333333335	B4GAT1M155T/M155T	B4GAT1-Mutant	B4GAT1
9	SO	JJ088	12.788931999999988	B4GAT1M155T/M155T	B4GAT1-Mutant	B4GAT1
9	SO	JJ097	17.120280666666662	WT	B4GAT1-Ctrl	B4GAT1
9	SO	JJ098	1.7371513333333344	WT	B4GAT1-Ctrl	B4GAT1
9	SO	JJ099	36.448105	WT	B4GAT1-Ctrl	B4GAT1
9	SO	JJ100	9.434898333333328	WT	B4GAT1-Ctrl	B4GAT1
9	SO	JJ105	49.230955	WT	B4GAT1-Ctrl	B4GAT1
9	SO	JJ106	-2.381422333333338	WT	B4GAT1-Ctrl	B4GAT1
9	SO	JJ107	15.302368000000001	WT	B4GAT1-Ctrl	B4GAT1
9	SO	JJ108	203.7214736666667	WT	B4GAT1-Ctrl	B4GAT1
9	SO	JJ109	33.37983566666668	Emx-Cre+;DGF/-	Emx-DG-cKO	Emx-DG
9	SO	JJ110	33.706661999999994	Emx-Cre+;DGF/-	Emx-DG-cKO	Emx-DG
9	SO	JJ114	20.652918999999994	Emx-Cre+;DGF/-	Emx-DG-cKO	Emx-DG
9	SO	JJ115	12.400107000000006	Emx-Cre+;DGF/-	Emx-DG-cKO	Emx-DG
9	SO	JJ116	7.946758666666668	Emx-Cre+;DGF/-	Emx-DG-cKO	Emx-DG
9	SO	JJ117	9.81456766666667	Emx-Cre+;DGF/-	Emx-DG-cKO	Emx-DG
9	SO	JJ130	25.150379	Emx-Cre+;DGF/+	Emx-DG-Ctrl	Emx-DG
9	SO	JJ131	95.25111000000001	Emx-Cre+;DGF/+	Emx-DG-Ctrl	Emx-DG
9	SO	JJ132	29.53096233333333	Emx-Cre+;DGF/+	Emx-DG-Ctrl	Emx-DG
9	SO	JJ133	49.06002233333333	Emx-Cre+;DGF/+	Emx-DG-Ctrl	Emx-DG
9	SO	JJ146	9.145318333333327	Emx-Cre+;POMT2F/F	Emx-POMT2-cKO	Emx-POMT2
9	SO	JJ147	0.5783639999999982	Emx-Cre+;POMT2F/F	Emx-POMT2-cKO	Emx-POMT2
9	SO	JJ148	7.786771000000002	Emx-Cre+;POMT2F/F	Emx-POMT2-cKO	Emx-POMT2
9	SO	JJ149	9.939421666666666	Emx-Cre+;POMT2F/F	Emx-POMT2-cKO	Emx-POMT2
9	SO	JJ158	11.212383000000008	Emx-Cre+;POMT2F/+	Emx-POMT2-Ctrl	Emx-POMT2
9	SO	JJ159	4.129882333333332	Emx-Cre+;POMT2F/+	Emx-POMT2-Ctrl	Emx-POMT2
9	SO	JJ160	-1.0163159999999987	Emx-Cre+;POMT2F/+	Emx-POMT2-Ctrl	Emx-POMT2
9	SO	JJ161	8.28007733333333	Emx-Cre+;POMT2F/+	Emx-POMT2-Ctrl	Emx-POMT2
9	SO	JJ190	3.995081000000004	Emx-Cre+;DGF/-	Emx-DG-cKO	Emx-DG
9	SO	JJ191	65.91773033333335	Emx-Cre+;DGF/-	Emx-DG-cKO	Emx-DG
9	SO	JJ192	31.200468333333333	Emx-Cre+;DGF/-	Emx-DG-cKO	Emx-DG
9	SO	JJ193	74.118289	Emx-Cre+;DGF/+	Emx-DG-Ctrl	Emx-DG
9	SO	JJ194	38.480348000000006	Emx-Cre+;DGF/+	Emx-DG-Ctrl	Emx-DG
9	SO	JJ195	68.024709	Emx-Cre+;DGF/+	Emx-DG-Ctrl	Emx-DG
9	SO	JJ196	101.25489733333333	Emx-Cre+;DGF/+	Emx-DG-Ctrl	Emx-DG
9	SO	JJ201	6.0462116666666645	Emx-Cre+;DGF/-	Emx-DG-cKO	Emx-DG
9	SO	JJ202	-1.6055646666666707	Emx-Cre+;DGF/-	Emx-DG-cKO	Emx-DG
9	SO	JJ203	7.119503000000004	Emx-Cre+;DGF/-	Emx-DG-cKO	Emx-DG
9	SO	JJ204	26.198118000000004	Emx-Cre+;DGF/-	Emx-DG-cKO	Emx-DG
9	SO	JJ205	17.161910000000002	Emx-Cre+;DGF/+	Emx-DG-Ctrl	Emx-DG
9	SO	JJ206	15.056989333333334	Emx-Cre+;DGF/+	Emx-DG-Ctrl	Emx-DG
9	SO	JJ207	16.781245000000002	Emx-Cre+;DGF/+	Emx-DG-Ctrl	Emx-DG
9	SO	JJ208	0.21510700000000327	Emx-Cre+;DGF/+	Emx-DG-Ctrl	Emx-DG
9	SO	JJ209	20.761866999999995	Emx-Cre+;DGF/+	Emx-DG-Ctrl	Emx-DG
9	SO	JJ210	19.488970666666674	Emx-Cre+;DGF/+	Emx-DG-Ctrl	Emx-DG
9	SO	JJ211	6.85564566666667	Emx-Cre+;DGF/+	Emx-DG-Ctrl	Emx-DG
9	SO	JJ212	12.276519666666672	Emx-Cre+;DGF/+	Emx-DG-Ctrl	Emx-DG
9	SO	JJ213	6.282833000000001	Emx-Cre+;DGF/-	Emx-DG-cKO	Emx-DG
9	SO	JJ214	2.771449666666674	Emx-Cre+;DGF/-	Emx-DG-cKO	Emx-DG
9	SO	JJ215	18.976383	Emx-Cre+;DGF/+	Emx-DG-Ctrl	Emx-DG
9	SO	JJ216	12.88122833333333	Emx-Cre+;DGF/+	Emx-DG-Ctrl	Emx-DG
9	SO	JJ217	9.445922999999999	Emx-Cre+;DGF/+	Emx-DG-Ctrl	Emx-DG
9	SO	JJ218	17.156796000000003	Emx-Cre+;DGF/+	Emx-DG-Ctrl	Emx-DG
9	SO	JJ219	0.4048930000000013	Emx-Cre+;DGF/+	Emx-DG-Ctrl	Emx-DG
9	SO	JJ220	-5.21083866666667	Emx-Cre+;DGF/+	Emx-DG-Ctrl	Emx-DG
9	SO	JJ221	1.2133176666666639	Emx-Cre+;DGF/+	Emx-DG-Ctrl	Emx-DG
9	SO	JJ222	15.26399633333333	Emx-Cre+;DGF/+	Emx-DG-Ctrl	Emx-DG
9	SO	JJ223	37.86671033333334	Emx-Cre+;POMT2F/F	Emx-POMT2-cKO	Emx-POMT2
9	SO	JJ224	-7.740088333333337	Emx-Cre+;POMT2F/F	Emx-POMT2-cKO	Emx-POMT2
9	SO	JJ225	4.200409666666673	Emx-Cre+;POMT2F/F	Emx-POMT2-cKO	Emx-POMT2
9	SO	JJ226	24.444293000000002	Emx-Cre+;POMT2F/F	Emx-POMT2-cKO	Emx-POMT2
9	SO	JJ231	39.14791433333334	Emx-Cre+;POMT2F/+	Emx-POMT2-Ctrl	Emx-POMT2
9	SO	JJ232	16.737385666666672	Emx-Cre+;POMT2F/+	Emx-POMT2-Ctrl	Emx-POMT2
9	SO	JJ233	6.33496333333333	Emx-Cre+;POMT2F/+	Emx-POMT2-Ctrl	Emx-POMT2
9	SO	JJ234	22.142152666666675	Emx-Cre+;POMT2F/+	Emx-POMT2-Ctrl	Emx-POMT2
9	SO	JJ239	98.93406900000001	Emx-Cre+;POMT2F/+	Emx-POMT2-Ctrl	Emx-POMT2
9	SO	JJ240	93.60233733333332	Emx-Cre+;POMT2F/+	Emx-POMT2-Ctrl	Emx-POMT2
9	SO	JJ241	-3.027741999999994	Emx-Cre+;POMT2F/+	Emx-POMT2-Ctrl	Emx-POMT2
9	SO	JJ242	17.16153433333334	Emx-Cre+;POMT2F/+	Emx-POMT2-Ctrl	Emx-POMT2
9	SO	JJ267	-9.85209833333334	FKRPMut	FKRP-Mutant	FKRP
9	SO	JJ268	-2.331290999999998	FKRPMut	FKRP-Mutant	FKRP
9	SO	JJ269	-0.060840000000003634	FKRPMut	FKRP-Mutant	FKRP
9	SO	JJ270	-4.488781999999991	FKRPMut	FKRP-Mutant	FKRP
9	SO	JJ271	-0.37000133333333923	WT	FKRP-Ctrl	FKRP
9	SO	JJ272	10.615695666666662	WT	FKRP-Ctrl	FKRP
9	SO	JJ273	0.4065036666666704	WT	FKRP-Ctrl	FKRP
9	SO	JJ274	1.9567366666666668	WT	FKRP-Ctrl	FKRP
9	SO	JJ275	11.879206666666661	WT	FKRP-Ctrl	FKRP
9	SO	JJ276	10.85738733333333	WT	FKRP-Ctrl	FKRP
9	SO	JJ277	0.8417703333333293	WT	FKRP-Ctrl	FKRP
9	SO	JJ278	18.57051800000001	WT	FKRP-Ctrl	FKRP
9	SO	JJ279	28.00427433333333	FKRPMut	FKRP-Mutant	FKRP
9	SO	JJ280	39.785272333333346	FKRPMut	FKRP-Mutant	FKRP
9	SO	JJ281	17.15408933333333	FKRPMut	FKRP-Mutant	FKRP
9	SO	JJ282	18.821414000000004	FKRPMut	FKRP-Mutant	FKRP
9	SO	JJ283	25.084369333333328	WT	FKRP-Ctrl	FKRP
9	SO	JJ284	17.470989	WT	FKRP-Ctrl	FKRP
9	SO	JJ285	9.920758666666666	WT	FKRP-Ctrl	FKRP
9	SO	JJ286	46.08200366666666	WT	FKRP-Ctrl	FKRP
9	SO	JJ287	32.70637000000001	DGdelta/-	ICD-Mutant	ICD
9	SO	JJ288	20.996954666666678	DGdelta/-	ICD-Mutant	ICD
9	SO	JJ289	23.012633333333337	DGdelta/-	ICD-Mutant	ICD
9	SO	JJ290	34.981952666666665	DGdelta/-	ICD-Mutant	ICD
9	SO	JJ295	28.27117633333334	WT	ICD-Ctrl	ICD
9	SO	JJ296	26.48040233333333	WT	ICD-Ctrl	ICD
9	SO	JJ297	19.208971000000002	WT	ICD-Ctrl	ICD
9	SO	JJ298	38.91303666666667	WT	ICD-Ctrl	ICD
9	SO	JJ327	20.736123333333328	DGdelta/-	ICD-Mutant	ICD
9	SO	JJ328	26.015446000000015	DGdelta/-	ICD-Mutant	ICD
9	SO	JJ329	42.368515666666674	DGdelta/-	ICD-Mutant	ICD
9	SO	JJ330	-0.29519933333332443	DGdelta/-	ICD-Mutant	ICD
9	SO	JJ335	50.789581999999996	DGdelta/-	ICD-Mutant	ICD
9	SO	JJ336	67.23249133333333	DGdelta/-	ICD-Mutant	ICD
9	SO	JJ337	52.14997400000001	DGdelta/-	ICD-Mutant	ICD
9	SO	JJ338	29.029541999999996	DGdelta/-	ICD-Mutant	ICD
9	SO	JJ343	27.08270966666666	WT	ICD-Ctrl	ICD
9	SO	JJ344	19.021408999999995	WT	ICD-Ctrl	ICD
9	SO	JJ345	15.471824999999995	WT	ICD-Ctrl	ICD
9	SO	JJ346	4.375768999999996	WT	ICD-Ctrl	ICD
9	SO	JJ351	14.297462000000005	WT	ICD-Ctrl	ICD
9	SO	JJ352	35.92190466666668	WT	ICD-Ctrl	ICD
9	SO	JJ353	8.553648333333337	WT	ICD-Ctrl	ICD
9	SO	JJ354	15.641141	WT	ICD-Ctrl	ICD
9	SO	JJ359	5.133205699999995	FKRPMut	FKRP-Mutant	FKRP
9	SO	JJ360	14.474774000000002	FKRPMut	FKRP-Mutant	FKRP
9	SO	JJ361	44.55744800000001	FKRPMut	FKRP-Mutant	FKRP
9	SO	JJ366	18.488034666666668	WT	FKRP-Ctrl	FKRP
9	SO	JJ367	38.499002000000004	WT	FKRP-Ctrl	FKRP
9	SO	JJ368	15.949061833333337	WT	FKRP-Ctrl	FKRP
10	SO	JJ021	-14.333975333333342	WT	B4GAT1-Ctrl	B4GAT1
10	SO	JJ022	0.6234056666666655	WT	B4GAT1-Ctrl	B4GAT1
10	SO	JJ023	2.969920000000002	WT	B4GAT1-Ctrl	B4GAT1
10	SO	JJ024	-13.68140466666667	WT	B4GAT1-Ctrl	B4GAT1
10	SO	JJ025	9.075942999999995	B4GAT1M155T/M155T	B4GAT1-Mutant	B4GAT1
10	SO	JJ026	-9.778821333333331	B4GAT1M155T/M155T	B4GAT1-Mutant	B4GAT1
10	SO	JJ027	-11.25812333333333	B4GAT1M155T/M155T	B4GAT1-Mutant	B4GAT1
10	SO	JJ028	8.247902666666661	B4GAT1M155T/M155T	B4GAT1-Mutant	B4GAT1
10	SO	JJ049	30.77885500000001	Emx-Cre+;POMT2F/F	Emx-POMT2-cKO	Emx-POMT2
10	SO	JJ050	20.128404333333332	Emx-Cre+;POMT2F/F	Emx-POMT2-cKO	Emx-POMT2
10	SO	JJ051	66.78167266666667	Emx-Cre+;POMT2F/F	Emx-POMT2-cKO	Emx-POMT2
10	SO	JJ052	48.749960666666674	Emx-Cre+;POMT2F/F	Emx-POMT2-cKO	Emx-POMT2
10	SO	JJ053	9.344795333333337	Emx-Cre+;POMT2F/+	Emx-POMT2-Ctrl	Emx-POMT2
10	SO	JJ054	16.725200666666666	Emx-Cre+;POMT2F/+	Emx-POMT2-Ctrl	Emx-POMT2
10	SO	JJ055	80.75652666666669	Emx-Cre+;POMT2F/+	Emx-POMT2-Ctrl	Emx-POMT2
10	SO	JJ056	120.20975666666665	Emx-Cre+;POMT2F/+	Emx-POMT2-Ctrl	Emx-POMT2
10	SO	JJ057	-9.20214633333334	Emx-Cre+;POMT2F/+	Emx-POMT2-Ctrl	Emx-POMT2
10	SO	JJ058	39.641233	Emx-Cre+;POMT2F/+	Emx-POMT2-Ctrl	Emx-POMT2
10	SO	JJ059	16.452893666666665	Emx-Cre+;POMT2F/+	Emx-POMT2-Ctrl	Emx-POMT2
10	SO	JJ060	37.034892333333346	Emx-Cre+;POMT2F/+	Emx-POMT2-Ctrl	Emx-POMT2
10	SO	JJ069	1.8289970000000058	B4GAT1M155T/M155T	B4GAT1-Mutant	B4GAT1
10	SO	JJ070	42.89980966666667	B4GAT1M155T/M155T	B4GAT1-Mutant	B4GAT1
10	SO	JJ071	-5.879565333333336	B4GAT1M155T/M155T	B4GAT1-Mutant	B4GAT1
10	SO	JJ072	19.14893166666667	B4GAT1M155T/M155T	B4GAT1-Mutant	B4GAT1
10	SO	JJ073	-8.924143666666666	B4GAT1M155T/M155T	B4GAT1-Mutant	B4GAT1
10	SO	JJ074	-4.350880666666664	B4GAT1M155T/M155T	B4GAT1-Mutant	B4GAT1
10	SO	JJ075	88.88896033333334	B4GAT1M155T/M155T	B4GAT1-Mutant	B4GAT1
10	SO	JJ076	55.671377	B4GAT1M155T/M155T	B4GAT1-Mutant	B4GAT1
10	SO	JJ081	-7.426281666666658	B4GAT1M155T/M155T	B4GAT1-Mutant	B4GAT1
10	SO	JJ082	32.344148	B4GAT1M155T/M155T	B4GAT1-Mutant	B4GAT1
10	SO	JJ083	8.7668635	B4GAT1M155T/M155T	B4GAT1-Mutant	B4GAT1
10	SO	JJ084	47.151804333333324	B4GAT1M155T/M155T	B4GAT1-Mutant	B4GAT1
10	SO	JJ085	17.467493666666673	B4GAT1M155T/M155T	B4GAT1-Mutant	B4GAT1
10	SO	JJ086	30.128868	B4GAT1M155T/M155T	B4GAT1-Mutant	B4GAT1
10	SO	JJ087	14.591402666666681	B4GAT1M155T/M155T	B4GAT1-Mutant	B4GAT1
10	SO	JJ088	5.543782000000003	B4GAT1M155T/M155T	B4GAT1-Mutant	B4GAT1
10	SO	JJ097	31.507464	WT	B4GAT1-Ctrl	B4GAT1
10	SO	JJ098	19.448067999999996	WT	B4GAT1-Ctrl	B4GAT1
10	SO	JJ099	65.39467166666668	WT	B4GAT1-Ctrl	B4GAT1
10	SO	JJ100	22.906748333333326	WT	B4GAT1-Ctrl	B4GAT1
10	SO	JJ105	15.903738333333337	WT	B4GAT1-Ctrl	B4GAT1
10	SO	JJ106	0.8432109999999872	WT	B4GAT1-Ctrl	B4GAT1
10	SO	JJ107	0.9282846666666652	WT	B4GAT1-Ctrl	B4GAT1
10	SO	JJ108	237.3442903333333	WT	B4GAT1-Ctrl	B4GAT1
10	SO	JJ109	27.80505233333334	Emx-Cre+;DGF/-	Emx-DG-cKO	Emx-DG
10	SO	JJ110	26.256861999999995	Emx-Cre+;DGF/-	Emx-DG-cKO	Emx-DG
10	SO	JJ114	18.140802333333337	Emx-Cre+;DGF/-	Emx-DG-cKO	Emx-DG
10	SO	JJ115	14.692590333333328	Emx-Cre+;DGF/-	Emx-DG-cKO	Emx-DG
10	SO	JJ116	13.865025333333335	Emx-Cre+;DGF/-	Emx-DG-cKO	Emx-DG
10	SO	JJ117	12.36471766666667	Emx-Cre+;DGF/-	Emx-DG-cKO	Emx-DG
10	SO	JJ130	31.62076233333333	Emx-Cre+;DGF/+	Emx-DG-Ctrl	Emx-DG
10	SO	JJ131	92.69212666666667	Emx-Cre+;DGF/+	Emx-DG-Ctrl	Emx-DG
10	SO	JJ132	33.73126233333333	Emx-Cre+;DGF/+	Emx-DG-Ctrl	Emx-DG
10	SO	JJ133	40.683688999999994	Emx-Cre+;DGF/+	Emx-DG-Ctrl	Emx-DG
10	SO	JJ146	6.6426349999999985	Emx-Cre+;POMT2F/F	Emx-POMT2-cKO	Emx-POMT2
10	SO	JJ147	6.917530666666664	Emx-Cre+;POMT2F/F	Emx-POMT2-cKO	Emx-POMT2
10	SO	JJ148	11.355770999999999	Emx-Cre+;POMT2F/F	Emx-POMT2-cKO	Emx-POMT2
10	SO	JJ149	17.38033833333333	Emx-Cre+;POMT2F/F	Emx-POMT2-cKO	Emx-POMT2
10	SO	JJ158	15.815016333333341	Emx-Cre+;POMT2F/+	Emx-POMT2-Ctrl	Emx-POMT2
10	SO	JJ159	5.134499000000001	Emx-Cre+;POMT2F/+	Emx-POMT2-Ctrl	Emx-POMT2
10	SO	JJ160	2.2106173333333317	Emx-Cre+;POMT2F/+	Emx-POMT2-Ctrl	Emx-POMT2
10	SO	JJ161	12.506710666666669	Emx-Cre+;POMT2F/+	Emx-POMT2-Ctrl	Emx-POMT2
10	SO	JJ190	2.0512476666666735	Emx-Cre+;DGF/-	Emx-DG-cKO	Emx-DG
10	SO	JJ191	38.298947	Emx-Cre+;DGF/-	Emx-DG-cKO	Emx-DG
10	SO	JJ192	38.374685	Emx-Cre+;DGF/-	Emx-DG-cKO	Emx-DG
10	SO	JJ193	74.57760566666667	Emx-Cre+;DGF/+	Emx-DG-Ctrl	Emx-DG
10	SO	JJ194	34.61746466666666	Emx-Cre+;DGF/+	Emx-DG-Ctrl	Emx-DG
10	SO	JJ195	72.53372566666667	Emx-Cre+;DGF/+	Emx-DG-Ctrl	Emx-DG
10	SO	JJ196	92.84861400000001	Emx-Cre+;DGF/+	Emx-DG-Ctrl	Emx-DG
10	SO	JJ201	7.525578333333333	Emx-Cre+;DGF/-	Emx-DG-cKO	Emx-DG
10	SO	JJ202	-2.6588813333333357	Emx-Cre+;DGF/-	Emx-DG-cKO	Emx-DG
10	SO	JJ203	12.423436333333337	Emx-Cre+;DGF/-	Emx-DG-cKO	Emx-DG
10	SO	JJ204	23.948084666666663	Emx-Cre+;DGF/-	Emx-DG-cKO	Emx-DG
10	SO	JJ205	19.084543333333343	Emx-Cre+;DGF/+	Emx-DG-Ctrl	Emx-DG
10	SO	JJ206	16.573356000000004	Emx-Cre+;DGF/+	Emx-DG-Ctrl	Emx-DG
10	SO	JJ207	16.26016166666666	Emx-Cre+;DGF/+	Emx-DG-Ctrl	Emx-DG
10	SO	JJ208	-3.346476333333335	Emx-Cre+;DGF/+	Emx-DG-Ctrl	Emx-DG
10	SO	JJ209	21.090867	Emx-Cre+;DGF/+	Emx-DG-Ctrl	Emx-DG
10	SO	JJ210	16.246237333333337	Emx-Cre+;DGF/+	Emx-DG-Ctrl	Emx-DG
10	SO	JJ211	9.306728999999999	Emx-Cre+;DGF/+	Emx-DG-Ctrl	Emx-DG
10	SO	JJ212	10.63813633333333	Emx-Cre+;DGF/+	Emx-DG-Ctrl	Emx-DG
10	SO	JJ213	7.0118163333333285	Emx-Cre+;DGF/-	Emx-DG-cKO	Emx-DG
10	SO	JJ214	3.1666496666666695	Emx-Cre+;DGF/-	Emx-DG-cKO	Emx-DG
10	SO	JJ215	17.248632999999998	Emx-Cre+;DGF/+	Emx-DG-Ctrl	Emx-DG
10	SO	JJ216	10.252728333333332	Emx-Cre+;DGF/+	Emx-DG-Ctrl	Emx-DG
10	SO	JJ217	11.927106333333327	Emx-Cre+;DGF/+	Emx-DG-Ctrl	Emx-DG
10	SO	JJ218	15.737395999999999	Emx-Cre+;DGF/+	Emx-DG-Ctrl	Emx-DG
10	SO	JJ219	2.224676333333335	Emx-Cre+;DGF/+	Emx-DG-Ctrl	Emx-DG
10	SO	JJ220	-5.471938666666669	Emx-Cre+;DGF/+	Emx-DG-Ctrl	Emx-DG
10	SO	JJ221	2.3147009999999995	Emx-Cre+;DGF/+	Emx-DG-Ctrl	Emx-DG
10	SO	JJ222	15.420712999999997	Emx-Cre+;DGF/+	Emx-DG-Ctrl	Emx-DG
10	SO	JJ223	33.75551033333333	Emx-Cre+;POMT2F/F	Emx-POMT2-cKO	Emx-POMT2
10	SO	JJ224	-2.489588333333335	Emx-Cre+;POMT2F/F	Emx-POMT2-cKO	Emx-POMT2
10	SO	JJ225	8.04232633333333	Emx-Cre+;POMT2F/F	Emx-POMT2-cKO	Emx-POMT2
10	SO	JJ226	21.320292999999996	Emx-Cre+;POMT2F/F	Emx-POMT2-cKO	Emx-POMT2
10	SO	JJ231	33.59531433333333	Emx-Cre+;POMT2F/+	Emx-POMT2-Ctrl	Emx-POMT2
10	SO	JJ232	11.640419000000009	Emx-Cre+;POMT2F/+	Emx-POMT2-Ctrl	Emx-POMT2
10	SO	JJ233	5.81686333333333	Emx-Cre+;POMT2F/+	Emx-POMT2-Ctrl	Emx-POMT2
10	SO	JJ234	35.041302666666674	Emx-Cre+;POMT2F/+	Emx-POMT2-Ctrl	Emx-POMT2
10	SO	JJ239	115.68175233333334	Emx-Cre+;POMT2F/+	Emx-POMT2-Ctrl	Emx-POMT2
10	SO	JJ240	75.53290399999999	Emx-Cre+;POMT2F/+	Emx-POMT2-Ctrl	Emx-POMT2
10	SO	JJ241	2.1724246666666667	Emx-Cre+;POMT2F/+	Emx-POMT2-Ctrl	Emx-POMT2
10	SO	JJ242	15.548367666666678	Emx-Cre+;POMT2F/+	Emx-POMT2-Ctrl	Emx-POMT2
10	SO	JJ267	-3.087598333333337	FKRPMut	FKRP-Mutant	FKRP
10	SO	JJ268	0.9182089999999997	FKRPMut	FKRP-Mutant	FKRP
10	SO	JJ269	4.232626666666661	FKRPMut	FKRP-Mutant	FKRP
10	SO	JJ270	-7.297131999999995	FKRPMut	FKRP-Mutant	FKRP
10	SO	JJ271	-1.2818679999999982	WT	FKRP-Ctrl	FKRP
10	SO	JJ272	11.619762333333332	WT	FKRP-Ctrl	FKRP
10	SO	JJ273	5.0269536666666665	WT	FKRP-Ctrl	FKRP
10	SO	JJ274	5.637220000000004	WT	FKRP-Ctrl	FKRP
10	SO	JJ275	6.038923333333339	WT	FKRP-Ctrl	FKRP
10	SO	JJ276	15.483470666666676	WT	FKRP-Ctrl	FKRP
10	SO	JJ277	1.5575036666666666	WT	FKRP-Ctrl	FKRP
10	SO	JJ278	14.048534666666663	WT	FKRP-Ctrl	FKRP
10	SO	JJ279	35.56995766666666	FKRPMut	FKRP-Mutant	FKRP
10	SO	JJ280	44.625672333333334	FKRPMut	FKRP-Mutant	FKRP
10	SO	JJ281	19.07532266666666	FKRPMut	FKRP-Mutant	FKRP
10	SO	JJ282	19.10858066666667	FKRPMut	FKRP-Mutant	FKRP
10	SO	JJ283	19.928186000000007	WT	FKRP-Ctrl	FKRP
10	SO	JJ284	22.411939000000004	WT	FKRP-Ctrl	FKRP
10	SO	JJ285	14.005291999999997	WT	FKRP-Ctrl	FKRP
10	SO	JJ286	45.27782033333333	WT	FKRP-Ctrl	FKRP
10	SO	JJ287	36.49432000000001	DGdelta/-	ICD-Mutant	ICD
10	SO	JJ288	18.57310466666667	DGdelta/-	ICD-Mutant	ICD
10	SO	JJ289	24.77503333333333	DGdelta/-	ICD-Mutant	ICD
10	SO	JJ290	35.28226933333333	DGdelta/-	ICD-Mutant	ICD
10	SO	JJ295	33.187109666666665	WT	ICD-Ctrl	ICD
10	SO	JJ296	31.933069000000003	WT	ICD-Ctrl	ICD
10	SO	JJ297	16.965037666666664	WT	ICD-Ctrl	ICD
10	SO	JJ298	51.514453333333336	WT	ICD-Ctrl	ICD
10	SO	JJ327	19.786356666666663	DGdelta/-	ICD-Mutant	ICD
10	SO	JJ328	28.855746	DGdelta/-	ICD-Mutant	ICD
10	SO	JJ329	37.52258233333333	DGdelta/-	ICD-Mutant	ICD
10	SO	JJ330	-0.8366993333333284	DGdelta/-	ICD-Mutant	ICD
10	SO	JJ335	49.931665333333335	DGdelta/-	ICD-Mutant	ICD
10	SO	JJ336	73.40274133333334	DGdelta/-	ICD-Mutant	ICD
10	SO	JJ337	56.67305733333333	DGdelta/-	ICD-Mutant	ICD
10	SO	JJ338	26.730725333333336	DGdelta/-	ICD-Mutant	ICD
10	SO	JJ343	21.415926333333328	WT	ICD-Ctrl	ICD
10	SO	JJ344	19.11970899999999	WT	ICD-Ctrl	ICD
10	SO	JJ345	22.379925000000004	WT	ICD-Ctrl	ICD
10	SO	JJ346	-0.41911433333334003	WT	ICD-Ctrl	ICD
10	SO	JJ351	21.803778666666677	WT	ICD-Ctrl	ICD
10	SO	JJ352	32.08342133333333	WT	ICD-Ctrl	ICD
10	SO	JJ353	0.6702983333333398	WT	ICD-Ctrl	ICD
10	SO	JJ354	16.14330766666667	WT	ICD-Ctrl	ICD
10	SO	JJ359	4.296952366666663	FKRPMut	FKRP-Mutant	FKRP
10	SO	JJ360	17.252374	FKRPMut	FKRP-Mutant	FKRP
10	SO	JJ361	46.29239800000001	FKRPMut	FKRP-Mutant	FKRP
10	SO	JJ366	19.712818000000002	WT	FKRP-Ctrl	FKRP
10	SO	JJ367	38.064368666666674	WT	FKRP-Ctrl	FKRP
10	SO	JJ368	19.103815166666667	WT	FKRP-Ctrl	FKRP
11	SO	JJ021	-13.549091999999993	WT	B4GAT1-Ctrl	B4GAT1
11	SO	JJ022	-7.5726943333333265	WT	B4GAT1-Ctrl	B4GAT1
11	SO	JJ023	9.403819999999996	WT	B4GAT1-Ctrl	B4GAT1
11	SO	JJ024	-7.297421333333337	WT	B4GAT1-Ctrl	B4GAT1
11	SO	JJ025	3.1215096666666633	B4GAT1M155T/M155T	B4GAT1-Mutant	B4GAT1
11	SO	JJ026	-6.922254666666665	B4GAT1M155T/M155T	B4GAT1-Mutant	B4GAT1
11	SO	JJ027	-12.129823333333334	B4GAT1M155T/M155T	B4GAT1-Mutant	B4GAT1
11	SO	JJ028	14.10890266666666	B4GAT1M155T/M155T	B4GAT1-Mutant	B4GAT1
11	SO	JJ049	30.136905000000002	Emx-Cre+;POMT2F/F	Emx-POMT2-cKO	Emx-POMT2
11	SO	JJ050	19.036637666666667	Emx-Cre+;POMT2F/F	Emx-POMT2-cKO	Emx-POMT2
11	SO	JJ051	60.333372666666655	Emx-Cre+;POMT2F/F	Emx-POMT2-cKO	Emx-POMT2
11	SO	JJ052	51.19159400000001	Emx-Cre+;POMT2F/F	Emx-POMT2-cKO	Emx-POMT2
11	SO	JJ053	11.378178666666676	Emx-Cre+;POMT2F/+	Emx-POMT2-Ctrl	Emx-POMT2
11	SO	JJ054	18.03341733333332	Emx-Cre+;POMT2F/+	Emx-POMT2-Ctrl	Emx-POMT2
11	SO	JJ055	86.74631000000001	Emx-Cre+;POMT2F/+	Emx-POMT2-Ctrl	Emx-POMT2
11	SO	JJ056	110.85845666666665	Emx-Cre+;POMT2F/+	Emx-POMT2-Ctrl	Emx-POMT2
11	SO	JJ057	-4.300596333333336	Emx-Cre+;POMT2F/+	Emx-POMT2-Ctrl	Emx-POMT2
11	SO	JJ058	50.442866333333335	Emx-Cre+;POMT2F/+	Emx-POMT2-Ctrl	Emx-POMT2
11	SO	JJ059	11.899977000000007	Emx-Cre+;POMT2F/+	Emx-POMT2-Ctrl	Emx-POMT2
11	SO	JJ060	29.06239233333332	Emx-Cre+;POMT2F/+	Emx-POMT2-Ctrl	Emx-POMT2
11	SO	JJ069	7.055646999999998	B4GAT1M155T/M155T	B4GAT1-Mutant	B4GAT1
11	SO	JJ070	35.33882633333334	B4GAT1M155T/M155T	B4GAT1-Mutant	B4GAT1
11	SO	JJ071	-5.390798666666664	B4GAT1M155T/M155T	B4GAT1-Mutant	B4GAT1
11	SO	JJ072	17.317664999999995	B4GAT1M155T/M155T	B4GAT1-Mutant	B4GAT1
11	SO	JJ073	-7.57979366666667	B4GAT1M155T/M155T	B4GAT1-Mutant	B4GAT1
11	SO	JJ074	-9.702647333333337	B4GAT1M155T/M155T	B4GAT1-Mutant	B4GAT1
11	SO	JJ075	95.75131033333334	B4GAT1M155T/M155T	B4GAT1-Mutant	B4GAT1
11	SO	JJ076	74.25164366666667	B4GAT1M155T/M155T	B4GAT1-Mutant	B4GAT1
11	SO	JJ081	-0.7441816666666577	B4GAT1M155T/M155T	B4GAT1-Mutant	B4GAT1
11	SO	JJ082	24.11753133333333	B4GAT1M155T/M155T	B4GAT1-Mutant	B4GAT1
11	SO	JJ083	1.5342884999999882	B4GAT1M155T/M155T	B4GAT1-Mutant	B4GAT1
11	SO	JJ084	20.016804333333326	B4GAT1M155T/M155T	B4GAT1-Mutant	B4GAT1
11	SO	JJ085	10.279177000000004	B4GAT1M155T/M155T	B4GAT1-Mutant	B4GAT1
11	SO	JJ086	21.071801333333337	B4GAT1M155T/M155T	B4GAT1-Mutant	B4GAT1
11	SO	JJ087	28.78541933333334	B4GAT1M155T/M155T	B4GAT1-Mutant	B4GAT1
11	SO	JJ088	9.530098666666666	B4GAT1M155T/M155T	B4GAT1-Mutant	B4GAT1
11	SO	JJ097	31.985613999999998	WT	B4GAT1-Ctrl	B4GAT1
11	SO	JJ098	2.3777346666666688	WT	B4GAT1-Ctrl	B4GAT1
11	SO	JJ099	16.969605	WT	B4GAT1-Ctrl	B4GAT1
11	SO	JJ100	13.613148333333328	WT	B4GAT1-Ctrl	B4GAT1
11	SO	JJ105	17.20203833333332	WT	B4GAT1-Ctrl	B4GAT1
11	SO	JJ106	5.818827666666654	WT	B4GAT1-Ctrl	B4GAT1
11	SO	JJ107	18.64120133333334	WT	B4GAT1-Ctrl	B4GAT1
11	SO	JJ108	282.27772366666665	WT	B4GAT1-Ctrl	B4GAT1
11	SO	JJ109	27.28283566666667	Emx-Cre+;DGF/-	Emx-DG-cKO	Emx-DG
11	SO	JJ110	22.339411999999992	Emx-Cre+;DGF/-	Emx-DG-cKO	Emx-DG
11	SO	JJ114	16.40200233333333	Emx-Cre+;DGF/-	Emx-DG-cKO	Emx-DG
11	SO	JJ115	17.322857000000003	Emx-Cre+;DGF/-	Emx-DG-cKO	Emx-DG
11	SO	JJ116	15.273342000000005	Emx-Cre+;DGF/-	Emx-DG-cKO	Emx-DG
11	SO	JJ117	12.04556766666667	Emx-Cre+;DGF/-	Emx-DG-cKO	Emx-DG
11	SO	JJ130	37.03196233333333	Emx-Cre+;DGF/+	Emx-DG-Ctrl	Emx-DG
11	SO	JJ131	65.38086000000001	Emx-Cre+;DGF/+	Emx-DG-Ctrl	Emx-DG
11	SO	JJ132	29.57654566666667	Emx-Cre+;DGF/+	Emx-DG-Ctrl	Emx-DG
11	SO	JJ133	38.38035566666666	Emx-Cre+;DGF/+	Emx-DG-Ctrl	Emx-DG
11	SO	JJ146	10.541651666666661	Emx-Cre+;POMT2F/F	Emx-POMT2-cKO	Emx-POMT2
11	SO	JJ147	3.574863999999996	Emx-Cre+;POMT2F/F	Emx-POMT2-cKO	Emx-POMT2
11	SO	JJ148	16.221354333333334	Emx-Cre+;POMT2F/F	Emx-POMT2-cKO	Emx-POMT2
11	SO	JJ149	14.721255000000005	Emx-Cre+;POMT2F/F	Emx-POMT2-cKO	Emx-POMT2
11	SO	JJ158	14.048799666666667	Emx-Cre+;POMT2F/+	Emx-POMT2-Ctrl	Emx-POMT2
11	SO	JJ159	0.9632989999999921	Emx-Cre+;POMT2F/+	Emx-POMT2-Ctrl	Emx-POMT2
11	SO	JJ160	5.496267333333331	Emx-Cre+;POMT2F/+	Emx-POMT2-Ctrl	Emx-POMT2
11	SO	JJ161	10.401494	Emx-Cre+;POMT2F/+	Emx-POMT2-Ctrl	Emx-POMT2
11	SO	JJ190	3.434081000000006	Emx-Cre+;DGF/-	Emx-DG-cKO	Emx-DG
11	SO	JJ191	31.811730333333333	Emx-Cre+;DGF/-	Emx-DG-cKO	Emx-DG
11	SO	JJ192	34.78171833333334	Emx-Cre+;DGF/-	Emx-DG-cKO	Emx-DG
11	SO	JJ193	82.344039	Emx-Cre+;DGF/+	Emx-DG-Ctrl	Emx-DG
11	SO	JJ194	36.853514666666676	Emx-Cre+;DGF/+	Emx-DG-Ctrl	Emx-DG
11	SO	JJ195	51.073292333333335	Emx-Cre+;DGF/+	Emx-DG-Ctrl	Emx-DG
11	SO	JJ196	88.35156400000001	Emx-Cre+;DGF/+	Emx-DG-Ctrl	Emx-DG
11	SO	JJ201	5.395545000000003	Emx-Cre+;DGF/-	Emx-DG-cKO	Emx-DG
11	SO	JJ202	-1.0698980000000045	Emx-Cre+;DGF/-	Emx-DG-cKO	Emx-DG
11	SO	JJ203	16.677753000000006	Emx-Cre+;DGF/-	Emx-DG-cKO	Emx-DG
11	SO	JJ204	21.589617999999998	Emx-Cre+;DGF/-	Emx-DG-cKO	Emx-DG
11	SO	JJ205	17.973826666666668	Emx-Cre+;DGF/+	Emx-DG-Ctrl	Emx-DG
11	SO	JJ206	13.36557266666667	Emx-Cre+;DGF/+	Emx-DG-Ctrl	Emx-DG
11	SO	JJ207	18.888994999999994	Emx-Cre+;DGF/+	Emx-DG-Ctrl	Emx-DG
11	SO	JJ208	5.330107000000001	Emx-Cre+;DGF/+	Emx-DG-Ctrl	Emx-DG
11	SO	JJ209	19.33520033333333	Emx-Cre+;DGF/+	Emx-DG-Ctrl	Emx-DG
11	SO	JJ210	16.013304	Emx-Cre+;DGF/+	Emx-DG-Ctrl	Emx-DG
11	SO	JJ211	9.865229	Emx-Cre+;DGF/+	Emx-DG-Ctrl	Emx-DG
11	SO	JJ212	9.354686333333339	Emx-Cre+;DGF/+	Emx-DG-Ctrl	Emx-DG
11	SO	JJ213	7.577916333333325	Emx-Cre+;DGF/-	Emx-DG-cKO	Emx-DG
11	SO	JJ214	4.120783000000006	Emx-Cre+;DGF/-	Emx-DG-cKO	Emx-DG
11	SO	JJ215	16.098883	Emx-Cre+;DGF/+	Emx-DG-Ctrl	Emx-DG
11	SO	JJ216	12.011478333333335	Emx-Cre+;DGF/+	Emx-DG-Ctrl	Emx-DG
11	SO	JJ217	17.016923000000002	Emx-Cre+;DGF/+	Emx-DG-Ctrl	Emx-DG
11	SO	JJ218	14.859879333333334	Emx-Cre+;DGF/+	Emx-DG-Ctrl	Emx-DG
11	SO	JJ219	-0.628107	Emx-Cre+;DGF/+	Emx-DG-Ctrl	Emx-DG
11	SO	JJ220	-4.518505333333342	Emx-Cre+;DGF/+	Emx-DG-Ctrl	Emx-DG
11	SO	JJ221	2.9902343333333334	Emx-Cre+;DGF/+	Emx-DG-Ctrl	Emx-DG
11	SO	JJ222	15.433329666666666	Emx-Cre+;DGF/+	Emx-DG-Ctrl	Emx-DG
11	SO	JJ223	45.51762700000001	Emx-Cre+;POMT2F/F	Emx-POMT2-cKO	Emx-POMT2
11	SO	JJ224	5.806161666666668	Emx-Cre+;POMT2F/F	Emx-POMT2-cKO	Emx-POMT2
11	SO	JJ225	7.214326333333328	Emx-Cre+;POMT2F/F	Emx-POMT2-cKO	Emx-POMT2
11	SO	JJ226	16.22845966666667	Emx-Cre+;POMT2F/F	Emx-POMT2-cKO	Emx-POMT2
11	SO	JJ231	40.092831	Emx-Cre+;POMT2F/+	Emx-POMT2-Ctrl	Emx-POMT2
11	SO	JJ232	14.187469000000002	Emx-Cre+;POMT2F/+	Emx-POMT2-Ctrl	Emx-POMT2
11	SO	JJ233	9.70404666666667	Emx-Cre+;POMT2F/+	Emx-POMT2-Ctrl	Emx-POMT2
11	SO	JJ234	41.447152666666675	Emx-Cre+;POMT2F/+	Emx-POMT2-Ctrl	Emx-POMT2
11	SO	JJ239	114.56440233333333	Emx-Cre+;POMT2F/+	Emx-POMT2-Ctrl	Emx-POMT2
11	SO	JJ240	65.61608733333334	Emx-Cre+;POMT2F/+	Emx-POMT2-Ctrl	Emx-POMT2
11	SO	JJ241	5.2327580000000085	Emx-Cre+;POMT2F/+	Emx-POMT2-Ctrl	Emx-POMT2
11	SO	JJ242	12.672451000000004	Emx-Cre+;POMT2F/+	Emx-POMT2-Ctrl	Emx-POMT2
11	SO	JJ267	-9.136015	FKRPMut	FKRP-Mutant	FKRP
11	SO	JJ268	-0.29220766666666026	FKRPMut	FKRP-Mutant	FKRP
11	SO	JJ269	3.6898266666666615	FKRPMut	FKRP-Mutant	FKRP
11	SO	JJ270	-4.392031999999996	FKRPMut	FKRP-Mutant	FKRP
11	SO	JJ271	5.771998666666671	WT	FKRP-Ctrl	FKRP
11	SO	JJ272	13.314278999999999	WT	FKRP-Ctrl	FKRP
11	SO	JJ273	10.145837000000009	WT	FKRP-Ctrl	FKRP
11	SO	JJ274	7.425319999999995	WT	FKRP-Ctrl	FKRP
11	SO	JJ275	7.913373333333335	WT	FKRP-Ctrl	FKRP
11	SO	JJ276	10.622970666666665	WT	FKRP-Ctrl	FKRP
11	SO	JJ277	0.8739370000000027	WT	FKRP-Ctrl	FKRP
11	SO	JJ278	12.751601333333335	WT	FKRP-Ctrl	FKRP
11	SO	JJ279	38.676024333333324	FKRPMut	FKRP-Mutant	FKRP
11	SO	JJ280	39.62110566666667	FKRPMut	FKRP-Mutant	FKRP
11	SO	JJ281	16.589755999999994	FKRPMut	FKRP-Mutant	FKRP
11	SO	JJ282	21.908330666666668	FKRPMut	FKRP-Mutant	FKRP
11	SO	JJ283	14.726036000000002	WT	FKRP-Ctrl	FKRP
11	SO	JJ284	21.37707233333333	WT	FKRP-Ctrl	FKRP
11	SO	JJ285	9.334508666666665	WT	FKRP-Ctrl	FKRP
11	SO	JJ286	47.16267033333334	WT	FKRP-Ctrl	FKRP
11	SO	JJ287	43.31795333333334	DGdelta/-	ICD-Mutant	ICD
11	SO	JJ288	21.359454666666664	DGdelta/-	ICD-Mutant	ICD
11	SO	JJ289	20.75388333333333	DGdelta/-	ICD-Mutant	ICD
11	SO	JJ290	28.771786000000002	DGdelta/-	ICD-Mutant	ICD
11	SO	JJ295	42.91225966666666	WT	ICD-Ctrl	ICD
11	SO	JJ296	25.326735666666675	WT	ICD-Ctrl	ICD
11	SO	JJ297	19.445887666666675	WT	ICD-Ctrl	ICD
11	SO	JJ298	46.75195333333334	WT	ICD-Ctrl	ICD
11	SO	JJ327	20.251623333333324	DGdelta/-	ICD-Mutant	ICD
11	SO	JJ328	28.415362666666663	DGdelta/-	ICD-Mutant	ICD
11	SO	JJ329	32.10268233333333	DGdelta/-	ICD-Mutant	ICD
11	SO	JJ330	1.1714673333333394	DGdelta/-	ICD-Mutant	ICD
11	SO	JJ335	49.310998666666656	DGdelta/-	ICD-Mutant	ICD
11	SO	JJ336	49.19107466666667	DGdelta/-	ICD-Mutant	ICD
11	SO	JJ337	65.458474	DGdelta/-	ICD-Mutant	ICD
11	SO	JJ338	13.846542000000008	DGdelta/-	ICD-Mutant	ICD
11	SO	JJ343	13.456376333333319	WT	ICD-Ctrl	ICD
11	SO	JJ344	17.249992333333335	WT	ICD-Ctrl	ICD
11	SO	JJ345	31.668158333333338	WT	ICD-Ctrl	ICD
11	SO	JJ346	0.09126899999999694	WT	ICD-Ctrl	ICD
11	SO	JJ351	24.16546200000001	WT	ICD-Ctrl	ICD
11	SO	JJ352	32.21465466666666	WT	ICD-Ctrl	ICD
11	SO	JJ353	-3.1420183333333305	WT	ICD-Ctrl	ICD
11	SO	JJ354	18.378057666666674	WT	ICD-Ctrl	ICD
11	SO	JJ359	4.586222366666661	FKRPMut	FKRP-Mutant	FKRP
11	SO	JJ360	19.105190666666662	FKRPMut	FKRP-Mutant	FKRP
11	SO	JJ361	49.25786466666667	FKRPMut	FKRP-Mutant	FKRP
11	SO	JJ366	21.780618000000008	WT	FKRP-Ctrl	FKRP
11	SO	JJ367	35.44858533333333	WT	FKRP-Ctrl	FKRP
11	SO	JJ368	17.441936833333333	WT	FKRP-Ctrl	FKRP
12	SO	JJ021	-13.513425333333325	WT	B4GAT1-Ctrl	B4GAT1
12	SO	JJ022	1.4141390000000058	WT	B4GAT1-Ctrl	B4GAT1
12	SO	JJ023	8.94398666666666	WT	B4GAT1-Ctrl	B4GAT1
12	SO	JJ024	-1.8635880000000025	WT	B4GAT1-Ctrl	B4GAT1
12	SO	JJ025	6.688426333333335	B4GAT1M155T/M155T	B4GAT1-Mutant	B4GAT1
12	SO	JJ026	-7.634421333333331	B4GAT1M155T/M155T	B4GAT1-Mutant	B4GAT1
12	SO	JJ027	-10.403739999999999	B4GAT1M155T/M155T	B4GAT1-Mutant	B4GAT1
12	SO	JJ028	16.567152666666672	B4GAT1M155T/M155T	B4GAT1-Mutant	B4GAT1
12	SO	JJ049	19.765238333333333	Emx-Cre+;POMT2F/F	Emx-POMT2-cKO	Emx-POMT2
12	SO	JJ050	22.775721000000004	Emx-Cre+;POMT2F/F	Emx-POMT2-cKO	Emx-POMT2
12	SO	JJ051	46.28162266666667	Emx-Cre+;POMT2F/F	Emx-POMT2-cKO	Emx-POMT2
12	SO	JJ052	64.04117733333332	Emx-Cre+;POMT2F/F	Emx-POMT2-cKO	Emx-POMT2
12	SO	JJ053	12.502928666666671	Emx-Cre+;POMT2F/+	Emx-POMT2-Ctrl	Emx-POMT2
12	SO	JJ054	14.85875066666666	Emx-Cre+;POMT2F/+	Emx-POMT2-Ctrl	Emx-POMT2
12	SO	JJ055	80.053976666666685	Emx-Cre+;POMT2F/+	Emx-POMT2-Ctrl	Emx-POMT2
12	SO	JJ056	132.52620666666667	Emx-Cre+;POMT2F/+	Emx-POMT2-Ctrl	Emx-POMT2
12	SO	JJ057	-3.0195963333333395	Emx-Cre+;POMT2F/+	Emx-POMT2-Ctrl	Emx-POMT2
12	SO	JJ058	51.666283	Emx-Cre+;POMT2F/+	Emx-POMT2-Ctrl	Emx-POMT2
12	SO	JJ059	6.102560333333334	Emx-Cre+;POMT2F/+	Emx-POMT2-Ctrl	Emx-POMT2
12	SO	JJ060	31.871225666666664	Emx-Cre+;POMT2F/+	Emx-POMT2-Ctrl	Emx-POMT2
12	SO	JJ069	4.39456366666667	B4GAT1M155T/M155T	B4GAT1-Mutant	B4GAT1
12	SO	JJ070	22.230409666666663	B4GAT1M155T/M155T	B4GAT1-Mutant	B4GAT1
12	SO	JJ071	-4.212465333333323	B4GAT1M155T/M155T	B4GAT1-Mutant	B4GAT1
12	SO	JJ072	16.808164999999992	B4GAT1M155T/M155T	B4GAT1-Mutant	B4GAT1
12	SO	JJ073	1.8152063333333264	B4GAT1M155T/M155T	B4GAT1-Mutant	B4GAT1
12	SO	JJ074	-2.3831473333333215	B4GAT1M155T/M155T	B4GAT1-Mutant	B4GAT1
12	SO	JJ075	96.98331033333334	B4GAT1M155T/M155T	B4GAT1-Mutant	B4GAT1
12	SO	JJ076	44.288477	B4GAT1M155T/M155T	B4GAT1-Mutant	B4GAT1
12	SO	JJ081	0.06298500000000236	B4GAT1M155T/M155T	B4GAT1-Mutant	B4GAT1
12	SO	JJ082	25.216114666666666	B4GAT1M155T/M155T	B4GAT1-Mutant	B4GAT1
12	SO	JJ083	2.7242885	B4GAT1M155T/M155T	B4GAT1-Mutant	B4GAT1
12	SO	JJ084	25.87247099999999	B4GAT1M155T/M155T	B4GAT1-Mutant	B4GAT1
12	SO	JJ085	8.608260333333334	B4GAT1M155T/M155T	B4GAT1-Mutant	B4GAT1
12	SO	JJ086	12.68513466666667	B4GAT1M155T/M155T	B4GAT1-Mutant	B4GAT1
12	SO	JJ087	23.779586000000013	B4GAT1M155T/M155T	B4GAT1-Mutant	B4GAT1
12	SO	JJ088	16.239765333333338	B4GAT1M155T/M155T	B4GAT1-Mutant	B4GAT1
12	SO	JJ097	47.39953066666667	WT	B4GAT1-Ctrl	B4GAT1
12	SO	JJ098	-4.761931999999992	WT	B4GAT1-Ctrl	B4GAT1
12	SO	JJ099	7.272605000000008	WT	B4GAT1-Ctrl	B4GAT1
12	SO	JJ100	7.1580649999999935	WT	B4GAT1-Ctrl	B4GAT1
12	SO	JJ105	28.294871666666676	WT	B4GAT1-Ctrl	B4GAT1
12	SO	JJ106	4.236494333333316	WT	B4GAT1-Ctrl	B4GAT1
12	SO	JJ107	15.076617999999996	WT	B4GAT1-Ctrl	B4GAT1
12	SO	JJ108	301.31197366666663	WT	B4GAT1-Ctrl	B4GAT1
12	SO	JJ109	23.176252333333327	Emx-Cre+;DGF/-	Emx-DG-cKO	Emx-DG
12	SO	JJ110	21.437578666666656	Emx-Cre+;DGF/-	Emx-DG-cKO	Emx-DG
12	SO	JJ114	16.095918999999995	Emx-Cre+;DGF/-	Emx-DG-cKO	Emx-DG
12	SO	JJ115	16.233773666666668	Emx-Cre+;DGF/-	Emx-DG-cKO	Emx-DG
12	SO	JJ116	15.877841999999996	Emx-Cre+;DGF/-	Emx-DG-cKO	Emx-DG
12	SO	JJ117	7.371900999999994	Emx-Cre+;DGF/-	Emx-DG-cKO	Emx-DG
12	SO	JJ130	30.812712333333327	Emx-Cre+;DGF/+	Emx-DG-Ctrl	Emx-DG
12	SO	JJ131	60.74185999999999	Emx-Cre+;DGF/+	Emx-DG-Ctrl	Emx-DG
12	SO	JJ132	29.267462333333327	Emx-Cre+;DGF/+	Emx-DG-Ctrl	Emx-DG
12	SO	JJ133	36.69510566666666	Emx-Cre+;DGF/+	Emx-DG-Ctrl	Emx-DG
12	SO	JJ146	17.37506833333333	Emx-Cre+;POMT2F/F	Emx-POMT2-cKO	Emx-POMT2
12	SO	JJ147	4.699113999999999	Emx-Cre+;POMT2F/F	Emx-POMT2-cKO	Emx-POMT2
12	SO	JJ148	9.272604333333328	Emx-Cre+;POMT2F/F	Emx-POMT2-cKO	Emx-POMT2
12	SO	JJ149	11.798171666666667	Emx-Cre+;POMT2F/F	Emx-POMT2-cKO	Emx-POMT2
12	SO	JJ158	18.284216333333337	Emx-Cre+;POMT2F/+	Emx-POMT2-Ctrl	Emx-POMT2
12	SO	JJ159	2.5527156666666664	Emx-Cre+;POMT2F/+	Emx-POMT2-Ctrl	Emx-POMT2
12	SO	JJ160	10.65210066666667	Emx-Cre+;POMT2F/+	Emx-POMT2-Ctrl	Emx-POMT2
12	SO	JJ161	7.896493999999994	Emx-Cre+;POMT2F/+	Emx-POMT2-Ctrl	Emx-POMT2
12	SO	JJ190	7.330831000000003	Emx-Cre+;DGF/-	Emx-DG-cKO	Emx-DG
12	SO	JJ191	31.89581366666667	Emx-Cre+;DGF/-	Emx-DG-cKO	Emx-DG
12	SO	JJ192	32.11621833333334	Emx-Cre+;DGF/-	Emx-DG-cKO	Emx-DG
12	SO	JJ193	72.94587233333334	Emx-Cre+;DGF/+	Emx-DG-Ctrl	Emx-DG
12	SO	JJ194	40.561431333333324	Emx-Cre+;DGF/+	Emx-DG-Ctrl	Emx-DG
12	SO	JJ195	39.09970900000001	Emx-Cre+;DGF/+	Emx-DG-Ctrl	Emx-DG
12	SO	JJ196	97.13256400000002	Emx-Cre+;DGF/+	Emx-DG-Ctrl	Emx-DG
12	SO	JJ201	2.940295000000001	Emx-Cre+;DGF/-	Emx-DG-cKO	Emx-DG
12	SO	JJ202	-0.4002313333333281	Emx-Cre+;DGF/-	Emx-DG-cKO	Emx-DG
12	SO	JJ203	21.907669666666667	Emx-Cre+;DGF/-	Emx-DG-cKO	Emx-DG
12	SO	JJ204	23.80911800000001	Emx-Cre+;DGF/-	Emx-DG-cKO	Emx-DG
12	SO	JJ205	18.977410000000003	Emx-Cre+;DGF/+	Emx-DG-Ctrl	Emx-DG
12	SO	JJ206	13.588406000000006	Emx-Cre+;DGF/+	Emx-DG-Ctrl	Emx-DG
12	SO	JJ207	19.709495	Emx-Cre+;DGF/+	Emx-DG-Ctrl	Emx-DG
12	SO	JJ208	20.809857000000004	Emx-Cre+;DGF/+	Emx-DG-Ctrl	Emx-DG
12	SO	JJ209	17.68778366666667	Emx-Cre+;DGF/+	Emx-DG-Ctrl	Emx-DG
12	SO	JJ210	17.81897066666667	Emx-Cre+;DGF/+	Emx-DG-Ctrl	Emx-DG
12	SO	JJ211	8.67306233333334	Emx-Cre+;DGF/+	Emx-DG-Ctrl	Emx-DG
12	SO	JJ212	11.529519666666673	Emx-Cre+;DGF/+	Emx-DG-Ctrl	Emx-DG
12	SO	JJ213	7.540666333333324	Emx-Cre+;DGF/-	Emx-DG-cKO	Emx-DG
12	SO	JJ214	4.245366333333334	Emx-Cre+;DGF/-	Emx-DG-cKO	Emx-DG
12	SO	JJ215	16.928299666666664	Emx-Cre+;DGF/+	Emx-DG-Ctrl	Emx-DG
12	SO	JJ216	17.305978333333332	Emx-Cre+;DGF/+	Emx-DG-Ctrl	Emx-DG
12	SO	JJ217	19.539006333333333	Emx-Cre+;DGF/+	Emx-DG-Ctrl	Emx-DG
12	SO	JJ218	14.610962666666666	Emx-Cre+;DGF/+	Emx-DG-Ctrl	Emx-DG
12	SO	JJ219	-1.0278569999999974	Emx-Cre+;DGF/+	Emx-DG-Ctrl	Emx-DG
12	SO	JJ220	-3.596672000000003	Emx-Cre+;DGF/+	Emx-DG-Ctrl	Emx-DG
12	SO	JJ221	3.1988176666666654	Emx-Cre+;DGF/+	Emx-DG-Ctrl	Emx-DG
12	SO	JJ222	18.740746333333334	Emx-Cre+;DGF/+	Emx-DG-Ctrl	Emx-DG
12	SO	JJ223	63.13429366666666	Emx-Cre+;POMT2F/F	Emx-POMT2-cKO	Emx-POMT2
12	SO	JJ224	12.558828333333329	Emx-Cre+;POMT2F/F	Emx-POMT2-cKO	Emx-POMT2
12	SO	JJ225	3.2476596666666686	Emx-Cre+;POMT2F/F	Emx-POMT2-cKO	Emx-POMT2
12	SO	JJ226	8.748043000000004	Emx-Cre+;POMT2F/F	Emx-POMT2-cKO	Emx-POMT2
12	SO	JJ231	45.828664333333336	Emx-Cre+;POMT2F/+	Emx-POMT2-Ctrl	Emx-POMT2
12	SO	JJ232	13.674719000000005	Emx-Cre+;POMT2F/+	Emx-POMT2-Ctrl	Emx-POMT2
12	SO	JJ233	7.607713333333332	Emx-Cre+;POMT2F/+	Emx-POMT2-Ctrl	Emx-POMT2
12	SO	JJ234	35.05290266666668	Emx-Cre+;POMT2F/+	Emx-POMT2-Ctrl	Emx-POMT2
12	SO	JJ239	104.23098566666667	Emx-Cre+;POMT2F/+	Emx-POMT2-Ctrl	Emx-POMT2
12	SO	JJ240	61.81592066666665	Emx-Cre+;POMT2F/+	Emx-POMT2-Ctrl	Emx-POMT2
12	SO	JJ241	4.161841333333332	Emx-Cre+;POMT2F/+	Emx-POMT2-Ctrl	Emx-POMT2
12	SO	JJ242	19.658617666666668	Emx-Cre+;POMT2F/+	Emx-POMT2-Ctrl	Emx-POMT2
12	SO	JJ267	-9.078765000000004	FKRPMut	FKRP-Mutant	FKRP
12	SO	JJ268	-2.1236243333333342	FKRPMut	FKRP-Mutant	FKRP
12	SO	JJ269	3.4434099999999908	FKRPMut	FKRP-Mutant	FKRP
12	SO	JJ270	-6.363198666666662	FKRPMut	FKRP-Mutant	FKRP
12	SO	JJ271	0.7940819999999983	WT	FKRP-Ctrl	FKRP
12	SO	JJ272	19.288529	WT	FKRP-Ctrl	FKRP
12	SO	JJ273	10.19300366666667	WT	FKRP-Ctrl	FKRP
12	SO	JJ274	12.173653333333343	WT	FKRP-Ctrl	FKRP
12	SO	JJ275	5.586623333333331	WT	FKRP-Ctrl	FKRP
12	SO	JJ276	17.322303999999992	WT	FKRP-Ctrl	FKRP
12	SO	JJ277	1.1097703333333395	WT	FKRP-Ctrl	FKRP
12	SO	JJ278	12.486184666666674	WT	FKRP-Ctrl	FKRP
12	SO	JJ279	40.492857666666666	FKRPMut	FKRP-Mutant	FKRP
12	SO	JJ280	44.425689	FKRPMut	FKRP-Mutant	FKRP
12	SO	JJ281	15.916672666666665	FKRPMut	FKRP-Mutant	FKRP
12	SO	JJ282	21.655747333333334	FKRPMut	FKRP-Mutant	FKRP
12	SO	JJ283	14.50745266666666	WT	FKRP-Ctrl	FKRP
12	SO	JJ284	28.304655666666665	WT	FKRP-Ctrl	FKRP
12	SO	JJ285	11.384925333333333	WT	FKRP-Ctrl	FKRP
12	SO	JJ286	50.35475366666666	WT	FKRP-Ctrl	FKRP
12	SO	JJ287	40.70728666666667	DGdelta/-	ICD-Mutant	ICD
12	SO	JJ288	24.702704666666662	DGdelta/-	ICD-Mutant	ICD
12	SO	JJ289	19.432216666666665	DGdelta/-	ICD-Mutant	ICD
12	SO	JJ290	24.138202666666672	DGdelta/-	ICD-Mutant	ICD
12	SO	JJ295	26.378509666666663	WT	ICD-Ctrl	ICD
12	SO	JJ296	27.651485666666662	WT	ICD-Ctrl	ICD
12	SO	JJ297	15.749804333333339	WT	ICD-Ctrl	ICD
12	SO	JJ298	38.86087	WT	ICD-Ctrl	ICD
12	SO	JJ327	20.94104	DGdelta/-	ICD-Mutant	ICD
12	SO	JJ328	24.75577933333334	DGdelta/-	ICD-Mutant	ICD
12	SO	JJ329	32.374348999999995	DGdelta/-	ICD-Mutant	ICD
12	SO	JJ330	0.972217333333333	DGdelta/-	ICD-Mutant	ICD
12	SO	JJ335	47.658332	DGdelta/-	ICD-Mutant	ICD
12	SO	JJ336	28.548158	DGdelta/-	ICD-Mutant	ICD
12	SO	JJ337	55.178640666666666	DGdelta/-	ICD-Mutant	ICD
12	SO	JJ338	8.896458666666666	DGdelta/-	ICD-Mutant	ICD
12	SO	JJ343	19.129709666666656	WT	ICD-Ctrl	ICD
12	SO	JJ344	15.988492333333332	WT	ICD-Ctrl	ICD
12	SO	JJ345	33.05507500000001	WT	ICD-Ctrl	ICD
12	SO	JJ346	-0.5402310000000009	WT	ICD-Ctrl	ICD
12	SO	JJ351	24.05379533333333	WT	ICD-Ctrl	ICD
12	SO	JJ352	26.672404666666665	WT	ICD-Ctrl	ICD
12	SO	JJ353	-1.9524350000000037	WT	ICD-Ctrl	ICD
12	SO	JJ354	20.42880766666666	WT	ICD-Ctrl	ICD
12	SO	JJ359	5.047280700000002	FKRPMut	FKRP-Mutant	FKRP
12	SO	JJ360	20.407357333333326	FKRPMut	FKRP-Mutant	FKRP
12	SO	JJ361	41.732698000000006	FKRPMut	FKRP-Mutant	FKRP
12	SO	JJ366	17.974868	WT	FKRP-Ctrl	FKRP
12	SO	JJ367	32.14266866666667	WT	FKRP-Ctrl	FKRP
12	SO	JJ368	16.005945166666663	WT	FKRP-Ctrl	FKRP
13	SO	JJ021	-7.777042000000004	WT	B4GAT1-Ctrl	B4GAT1
13	SO	JJ022	0.7404056666666605	WT	B4GAT1-Ctrl	B4GAT1
13	SO	JJ023	27.726853333333327	WT	B4GAT1-Ctrl	B4GAT1
13	SO	JJ024	-1.7273380000000127	WT	B4GAT1-Ctrl	B4GAT1
13	SO	JJ025	13.764476333333334	B4GAT1M155T/M155T	B4GAT1-Mutant	B4GAT1
13	SO	JJ026	-6.951354666666664	B4GAT1M155T/M155T	B4GAT1-Mutant	B4GAT1
13	SO	JJ027	-4.302990000000004	B4GAT1M155T/M155T	B4GAT1-Mutant	B4GAT1
13	SO	JJ028	-3.9185640000000035	B4GAT1M155T/M155T	B4GAT1-Mutant	B4GAT1
13	SO	JJ049	18.845588333333335	Emx-Cre+;POMT2F/F	Emx-POMT2-cKO	Emx-POMT2
13	SO	JJ050	22.736937666666666	Emx-Cre+;POMT2F/F	Emx-POMT2-cKO	Emx-POMT2
13	SO	JJ051	69.71533933333333	Emx-Cre+;POMT2F/F	Emx-POMT2-cKO	Emx-POMT2
13	SO	JJ052	69.57536066666667	Emx-Cre+;POMT2F/F	Emx-POMT2-cKO	Emx-POMT2
13	SO	JJ053	23.04399533333334	Emx-Cre+;POMT2F/+	Emx-POMT2-Ctrl	Emx-POMT2
13	SO	JJ054	15.500534000000007	Emx-Cre+;POMT2F/+	Emx-POMT2-Ctrl	Emx-POMT2
13	SO	JJ055	86.91919333333333	Emx-Cre+;POMT2F/+	Emx-POMT2-Ctrl	Emx-POMT2
13	SO	JJ056	181.79689	Emx-Cre+;POMT2F/+	Emx-POMT2-Ctrl	Emx-POMT2
13	SO	JJ057	1.4399203333333332	Emx-Cre+;POMT2F/+	Emx-POMT2-Ctrl	Emx-POMT2
13	SO	JJ058	52.68676633333334	Emx-Cre+;POMT2F/+	Emx-POMT2-Ctrl	Emx-POMT2
13	SO	JJ059	19.946960333333333	Emx-Cre+;POMT2F/+	Emx-POMT2-Ctrl	Emx-POMT2
13	SO	JJ060	40.67202566666668	Emx-Cre+;POMT2F/+	Emx-POMT2-Ctrl	Emx-POMT2
13	SO	JJ069	5.7519303333333385	B4GAT1M155T/M155T	B4GAT1-Mutant	B4GAT1
13	SO	JJ070	20.604542999999996	B4GAT1M155T/M155T	B4GAT1-Mutant	B4GAT1
13	SO	JJ071	1.7238346666666662	B4GAT1M155T/M155T	B4GAT1-Mutant	B4GAT1
13	SO	JJ072	24.075665000000004	B4GAT1M155T/M155T	B4GAT1-Mutant	B4GAT1
13	SO	JJ073	-6.709010333333334	B4GAT1M155T/M155T	B4GAT1-Mutant	B4GAT1
13	SO	JJ074	-5.569480666666664	B4GAT1M155T/M155T	B4GAT1-Mutant	B4GAT1
13	SO	JJ075	92.134827	B4GAT1M155T/M155T	B4GAT1-Mutant	B4GAT1
13	SO	JJ076	42.323910333333345	B4GAT1M155T/M155T	B4GAT1-Mutant	B4GAT1
13	SO	JJ081	-3.7992816666666678	B4GAT1M155T/M155T	B4GAT1-Mutant	B4GAT1
13	SO	JJ082	25.77248133333333	B4GAT1M155T/M155T	B4GAT1-Mutant	B4GAT1
13	SO	JJ083	6.412863499999986	B4GAT1M155T/M155T	B4GAT1-Mutant	B4GAT1
13	SO	JJ084	23.709004333333326	B4GAT1M155T/M155T	B4GAT1-Mutant	B4GAT1
13	SO	JJ085	0.8190270000000055	B4GAT1M155T/M155T	B4GAT1-Mutant	B4GAT1
13	SO	JJ086	60.22253466666666	B4GAT1M155T/M155T	B4GAT1-Mutant	B4GAT1
13	SO	JJ087	25.823269333333343	B4GAT1M155T/M155T	B4GAT1-Mutant	B4GAT1
13	SO	JJ088	23.207182	B4GAT1M155T/M155T	B4GAT1-Mutant	B4GAT1
13	SO	JJ097	46.78493066666667	WT	B4GAT1-Ctrl	B4GAT1
13	SO	JJ098	-7.061332000000003	WT	B4GAT1-Ctrl	B4GAT1
13	SO	JJ099	31.759938333333327	WT	B4GAT1-Ctrl	B4GAT1
13	SO	JJ100	25.586481666666668	WT	B4GAT1-Ctrl	B4GAT1
13	SO	JJ105	23.793805000000003	WT	B4GAT1-Ctrl	B4GAT1
13	SO	JJ106	-2.512855666666676	WT	B4GAT1-Ctrl	B4GAT1
13	SO	JJ107	7.59975133333333	WT	B4GAT1-Ctrl	B4GAT1
13	SO	JJ108	284.27089033333334	WT	B4GAT1-Ctrl	B4GAT1
13	SO	JJ109	16.131719	Emx-Cre+;DGF/-	Emx-DG-cKO	Emx-DG
13	SO	JJ110	30.584062000000003	Emx-Cre+;DGF/-	Emx-DG-cKO	Emx-DG
13	SO	JJ114	14.10913566666666	Emx-Cre+;DGF/-	Emx-DG-cKO	Emx-DG
13	SO	JJ115	18.263457	Emx-Cre+;DGF/-	Emx-DG-cKO	Emx-DG
13	SO	JJ116	24.443291999999996	Emx-Cre+;DGF/-	Emx-DG-cKO	Emx-DG
13	SO	JJ117	8.866184333333337	Emx-Cre+;DGF/-	Emx-DG-cKO	Emx-DG
13	SO	JJ130	18.475695666666667	Emx-Cre+;DGF/+	Emx-DG-Ctrl	Emx-DG
13	SO	JJ131	91.55812666666667	Emx-Cre+;DGF/+	Emx-DG-Ctrl	Emx-DG
13	SO	JJ132	33.828262333333335	Emx-Cre+;DGF/+	Emx-DG-Ctrl	Emx-DG
13	SO	JJ133	29.574755666666658	Emx-Cre+;DGF/+	Emx-DG-Ctrl	Emx-DG
13	SO	JJ146	16.811301666666665	Emx-Cre+;POMT2F/F	Emx-POMT2-cKO	Emx-POMT2
13	SO	JJ147	7.2564639999999985	Emx-Cre+;POMT2F/F	Emx-POMT2-cKO	Emx-POMT2
13	SO	JJ148	6.057104333333332	Emx-Cre+;POMT2F/F	Emx-POMT2-cKO	Emx-POMT2
13	SO	JJ149	7.072538333333331	Emx-Cre+;POMT2F/F	Emx-POMT2-cKO	Emx-POMT2
13	SO	JJ158	14.71761633333334	Emx-Cre+;POMT2F/+	Emx-POMT2-Ctrl	Emx-POMT2
13	SO	JJ159	2.821965666666666	Emx-Cre+;POMT2F/+	Emx-POMT2-Ctrl	Emx-POMT2
13	SO	JJ160	5.1131506666666695	Emx-Cre+;POMT2F/+	Emx-POMT2-Ctrl	Emx-POMT2
13	SO	JJ161	12.047244000000006	Emx-Cre+;POMT2F/+	Emx-POMT2-Ctrl	Emx-POMT2
13	SO	JJ190	15.219381000000004	Emx-Cre+;DGF/-	Emx-DG-cKO	Emx-DG
13	SO	JJ191	27.789080333333334	Emx-Cre+;DGF/-	Emx-DG-cKO	Emx-DG
13	SO	JJ192	32.662085	Emx-Cre+;DGF/-	Emx-DG-cKO	Emx-DG
13	SO	JJ193	82.23860566666667	Emx-Cre+;DGF/+	Emx-DG-Ctrl	Emx-DG
13	SO	JJ194	48.65106466666666	Emx-Cre+;DGF/+	Emx-DG-Ctrl	Emx-DG
13	SO	JJ195	33.920458999999994	Emx-Cre+;DGF/+	Emx-DG-Ctrl	Emx-DG
13	SO	JJ196	93.96221399999999	Emx-Cre+;DGF/+	Emx-DG-Ctrl	Emx-DG
13	SO	JJ201	2.450445000000002	Emx-Cre+;DGF/-	Emx-DG-cKO	Emx-DG
13	SO	JJ202	-0.663281333333335	Emx-Cre+;DGF/-	Emx-DG-cKO	Emx-DG
13	SO	JJ203	22.687503000000003	Emx-Cre+;DGF/-	Emx-DG-cKO	Emx-DG
13	SO	JJ204	24.57568466666667	Emx-Cre+;DGF/-	Emx-DG-cKO	Emx-DG
13	SO	JJ205	18.98707666666667	Emx-Cre+;DGF/+	Emx-DG-Ctrl	Emx-DG
13	SO	JJ206	13.849822666666663	Emx-Cre+;DGF/+	Emx-DG-Ctrl	Emx-DG
13	SO	JJ207	21.780094999999992	Emx-Cre+;DGF/+	Emx-DG-Ctrl	Emx-DG
13	SO	JJ208	8.025057000000004	Emx-Cre+;DGF/+	Emx-DG-Ctrl	Emx-DG
13	SO	JJ209	21.793866999999995	Emx-Cre+;DGF/+	Emx-DG-Ctrl	Emx-DG
13	SO	JJ210	19.33897066666667	Emx-Cre+;DGF/+	Emx-DG-Ctrl	Emx-DG
13	SO	JJ211	9.32739566666667	Emx-Cre+;DGF/+	Emx-DG-Ctrl	Emx-DG
13	SO	JJ212	14.218203000000008	Emx-Cre+;DGF/+	Emx-DG-Ctrl	Emx-DG
13	SO	JJ213	6.912282999999998	Emx-Cre+;DGF/-	Emx-DG-cKO	Emx-DG
13	SO	JJ214	2.826383	Emx-Cre+;DGF/-	Emx-DG-cKO	Emx-DG
13	SO	JJ215	17.956233	Emx-Cre+;DGF/+	Emx-DG-Ctrl	Emx-DG
13	SO	JJ216	18.35692833333333	Emx-Cre+;DGF/+	Emx-DG-Ctrl	Emx-DG
13	SO	JJ217	22.819106333333327	Emx-Cre+;DGF/+	Emx-DG-Ctrl	Emx-DG
13	SO	JJ218	16.398862666666663	Emx-Cre+;DGF/+	Emx-DG-Ctrl	Emx-DG
13	SO	JJ219	1.2545430000000029	Emx-Cre+;DGF/+	Emx-DG-Ctrl	Emx-DG
13	SO	JJ220	-3.5238053333333377	Emx-Cre+;DGF/+	Emx-DG-Ctrl	Emx-DG
13	SO	JJ221	5.491767666666671	Emx-Cre+;DGF/+	Emx-DG-Ctrl	Emx-DG
13	SO	JJ222	16.575712999999997	Emx-Cre+;DGF/+	Emx-DG-Ctrl	Emx-DG
13	SO	JJ223	66.521577	Emx-Cre+;POMT2F/F	Emx-POMT2-cKO	Emx-POMT2
13	SO	JJ224	25.237144999999998	Emx-Cre+;POMT2F/F	Emx-POMT2-cKO	Emx-POMT2
13	SO	JJ225	-1.4760070000000052	Emx-Cre+;POMT2F/F	Emx-POMT2-cKO	Emx-POMT2
13	SO	JJ226	11.442226333333338	Emx-Cre+;POMT2F/F	Emx-POMT2-cKO	Emx-POMT2
13	SO	JJ231	49.040380999999996	Emx-Cre+;POMT2F/+	Emx-POMT2-Ctrl	Emx-POMT2
13	SO	JJ232	21.764752333333337	Emx-Cre+;POMT2F/+	Emx-POMT2-Ctrl	Emx-POMT2
13	SO	JJ233	5.251796666666668	Emx-Cre+;POMT2F/+	Emx-POMT2-Ctrl	Emx-POMT2
13	SO	JJ234	26.75696933333335	Emx-Cre+;POMT2F/+	Emx-POMT2-Ctrl	Emx-POMT2
13	SO	JJ239	85.87948566666667	Emx-Cre+;POMT2F/+	Emx-POMT2-Ctrl	Emx-POMT2
13	SO	JJ240	65.65663733333334	Emx-Cre+;POMT2F/+	Emx-POMT2-Ctrl	Emx-POMT2
13	SO	JJ241	6.290691333333332	Emx-Cre+;POMT2F/+	Emx-POMT2-Ctrl	Emx-POMT2
13	SO	JJ242	20.623567666666673	Emx-Cre+;POMT2F/+	Emx-POMT2-Ctrl	Emx-POMT2
13	SO	JJ267	-9.02119833333334	FKRPMut	FKRP-Mutant	FKRP
13	SO	JJ268	-3.1125243333333352	FKRPMut	FKRP-Mutant	FKRP
13	SO	JJ269	6.398026666666662	FKRPMut	FKRP-Mutant	FKRP
13	SO	JJ270	-0.647332000000001	FKRPMut	FKRP-Mutant	FKRP
13	SO	JJ271	0.898198666666668	WT	FKRP-Ctrl	FKRP
13	SO	JJ272	12.80229566666666	WT	FKRP-Ctrl	FKRP
13	SO	JJ273	7.6332870000000055	WT	FKRP-Ctrl	FKRP
13	SO	JJ274	10.842953333333336	WT	FKRP-Ctrl	FKRP
13	SO	JJ275	3.629589999999998	WT	FKRP-Ctrl	FKRP
13	SO	JJ276	17.352004000000004	WT	FKRP-Ctrl	FKRP
13	SO	JJ277	4.6766369999999995	WT	FKRP-Ctrl	FKRP
13	SO	JJ278	9.909268000000006	WT	FKRP-Ctrl	FKRP
13	SO	JJ279	39.547224333333325	FKRPMut	FKRP-Mutant	FKRP
13	SO	JJ280	42.55093900000001	FKRPMut	FKRP-Mutant	FKRP
13	SO	JJ281	14.487655999999996	FKRPMut	FKRP-Mutant	FKRP
13	SO	JJ282	22.055714	FKRPMut	FKRP-Mutant	FKRP
13	SO	JJ283	23.792052666666663	WT	FKRP-Ctrl	FKRP
13	SO	JJ284	29.24867233333333	WT	FKRP-Ctrl	FKRP
13	SO	JJ285	13.978225333333333	WT	FKRP-Ctrl	FKRP
13	SO	JJ286	55.38882033333333	WT	FKRP-Ctrl	FKRP
13	SO	JJ287	32.127586666666666	DGdelta/-	ICD-Mutant	ICD
13	SO	JJ288	15.471838	DGdelta/-	ICD-Mutant	ICD
13	SO	JJ289	15.316966666666664	DGdelta/-	ICD-Mutant	ICD
13	SO	JJ290	22.022069333333324	DGdelta/-	ICD-Mutant	ICD
13	SO	JJ295	26.990443	WT	ICD-Ctrl	ICD
13	SO	JJ296	31.227802333333333	WT	ICD-Ctrl	ICD
13	SO	JJ297	13.728771000000004	WT	ICD-Ctrl	ICD
13	SO	JJ298	31.624120000000005	WT	ICD-Ctrl	ICD
13	SO	JJ327	22.98162333333333	DGdelta/-	ICD-Mutant	ICD
13	SO	JJ328	30.70887933333333	DGdelta/-	ICD-Mutant	ICD
13	SO	JJ329	28.72538233333333	DGdelta/-	ICD-Mutant	ICD
13	SO	JJ330	-2.0230993333333345	DGdelta/-	ICD-Mutant	ICD
13	SO	JJ335	44.535598666666665	DGdelta/-	ICD-Mutant	ICD
13	SO	JJ336	33.64347466666666	DGdelta/-	ICD-Mutant	ICD
13	SO	JJ337	41.92165733333334	DGdelta/-	ICD-Mutant	ICD
13	SO	JJ338	14.662725333333341	DGdelta/-	ICD-Mutant	ICD
13	SO	JJ343	18.66752633333333	WT	ICD-Ctrl	ICD
13	SO	JJ344	18.05144233333333	WT	ICD-Ctrl	ICD
13	SO	JJ345	36.590991666666675	WT	ICD-Ctrl	ICD
13	SO	JJ346	-1.8877809999999993	WT	ICD-Ctrl	ICD
13	SO	JJ351	28.823845333333338	WT	ICD-Ctrl	ICD
13	SO	JJ352	17.426154666666672	WT	ICD-Ctrl	ICD
13	SO	JJ353	7.620631666666668	WT	ICD-Ctrl	ICD
13	SO	JJ354	24.721041000000003	WT	ICD-Ctrl	ICD
13	SO	JJ359	6.063959033333329	FKRPMut	FKRP-Mutant	FKRP
13	SO	JJ360	21.545840666666667	FKRPMut	FKRP-Mutant	FKRP
13	SO	JJ361	36.83773133333334	FKRPMut	FKRP-Mutant	FKRP
13	SO	JJ366	21.566951333333346	WT	FKRP-Ctrl	FKRP
13	SO	JJ367	37.07123533333333	WT	FKRP-Ctrl	FKRP
13	SO	JJ368	15.388548500000004	WT	FKRP-Ctrl	FKRP
14	SO	JJ021	5.738907999999991	WT	B4GAT1-Ctrl	B4GAT1
14	SO	JJ022	1.2488056666666647	WT	B4GAT1-Ctrl	B4GAT1
14	SO	JJ023	24.891653333333323	WT	B4GAT1-Ctrl	B4GAT1
14	SO	JJ024	-7.780588000000004	WT	B4GAT1-Ctrl	B4GAT1
14	SO	JJ025	15.521093000000002	B4GAT1M155T/M155T	B4GAT1-Mutant	B4GAT1
14	SO	JJ026	-5.865838000000001	B4GAT1M155T/M155T	B4GAT1-Mutant	B4GAT1
14	SO	JJ027	2.462676666666667	B4GAT1M155T/M155T	B4GAT1-Mutant	B4GAT1
14	SO	JJ028	-6.578680666666671	B4GAT1M155T/M155T	B4GAT1-Mutant	B4GAT1
14	SO	JJ049	25.07882166666666	Emx-Cre+;POMT2F/F	Emx-POMT2-cKO	Emx-POMT2
14	SO	JJ050	23.15305433333334	Emx-Cre+;POMT2F/F	Emx-POMT2-cKO	Emx-POMT2
[truncated: 59,201 more rows]
