# Supplementary material for: Inhibitory CCK+ basket synapse defects in mouse models of dystroglycanopathy
Source: eLife. 2024 Jan 5;12:RP87965. doi: 10.7554/eLife.87965 (PMC10942650; doi:10.7554/eLife.87965)
Supplement: Figure 3—source data 1. [file elife-87965-fig3-data1.csv]

um	Region	Image	Intensity	Genotype	Condition	Experiment
1	SO	JJ001	-45.932728999999995	Emx-Cre+;POMT2F/+	Emx-POMT2-Ctrl	Emx-POMT2
1	SO	JJ002	46.09418766666666	Emx-Cre+;POMT2F/F	Emx-POMT2-cKO	Emx-POMT2
1	SO	JJ003	-27.59203599999999	Emx-Cre+;POMT2F/+	Emx-POMT2-Ctrl	Emx-POMT2
1	SO	JJ004	-55.95208466666667	Emx-Cre+;POMT2F/+	Emx-POMT2-Ctrl	Emx-POMT2
1	SO	JJ005	-43.23641533333333	Emx-Cre+;POMT2F/+	Emx-POMT2-Ctrl	Emx-POMT2
1	SO	JJ006	5.632137666666675	Emx-Cre+;POMT2F/F	Emx-POMT2-cKO	Emx-POMT2
1	SO	JJ007	-14.855637999999999	Emx-Cre+;POMT2F/F	Emx-POMT2-cKO	Emx-POMT2
1	SO	JJ008	-14.01621400000001	Emx-Cre+;POMT2F/F	Emx-POMT2-cKO	Emx-POMT2
1	SO	JJ029	-42.42440966666667	WT	B4GAT1-Ctrl	B4GAT1
1	SO	JJ030	-58.09754533333333	WT	B4GAT1-Ctrl	B4GAT1
1	SO	JJ031	-54.819946666666645	WT	B4GAT1-Ctrl	B4GAT1
1	SO	JJ032	-86.93048733333336	WT	B4GAT1-Ctrl	B4GAT1
1	SO	JJ033	-22.67590766666667	B4GAT1M155T/M155T	B4GAT1-Mutant	B4GAT1
1	SO	JJ034	-51.755644666666676	B4GAT1M155T/M155T	B4GAT1-Mutant	B4GAT1
1	SO	JJ035	34.38313466666665	B4GAT1M155T/M155T	B4GAT1-Mutant	B4GAT1
1	SO	JJ036	0.08130999999999251	B4GAT1M155T/M155T	B4GAT1-Mutant	B4GAT1
1	SO	JJ061	-25.261295333333333	B4GAT1M155T/M155T	B4GAT1-Mutant	B4GAT1
1	SO	JJ062	-26.43294633333333	B4GAT1M155T/M155T	B4GAT1-Mutant	B4GAT1
1	SO	JJ063	-36.20395933333332	B4GAT1M155T/M155T	B4GAT1-Mutant	B4GAT1
1	SO	JJ064	-8.858706333333336	B4GAT1M155T/M155T	B4GAT1-Mutant	B4GAT1
1	SO	JJ065	-10.722772	B4GAT1M155T/M155T	B4GAT1-Mutant	B4GAT1
1	SO	JJ066	11.65192433333334	B4GAT1M155T/M155T	B4GAT1-Mutant	B4GAT1
1	SO	JJ067	-31.651032000000004	B4GAT1M155T/M155T	B4GAT1-Mutant	B4GAT1
1	SO	JJ068	-29.667668000000003	B4GAT1M155T/M155T	B4GAT1-Mutant	B4GAT1
1	SO	JJ077	8.720475333333331	B4GAT1M155T/M155T	B4GAT1-Mutant	B4GAT1
1	SO	JJ078	-22.130734666666683	B4GAT1M155T/M155T	B4GAT1-Mutant	B4GAT1
1	SO	JJ079	81.59560200000001	B4GAT1M155T/M155T	B4GAT1-Mutant	B4GAT1
1	SO	JJ080	-22.754728333333333	B4GAT1M155T/M155T	B4GAT1-Mutant	B4GAT1
1	SO	JJ089	179.81076966666663	B4GAT1M155T/M155T	B4GAT1-Mutant	B4GAT1
1	SO	JJ090	106.50145966666666	B4GAT1M155T/M155T	B4GAT1-Mutant	B4GAT1
1	SO	JJ091	50.294765666666656	B4GAT1M155T/M155T	B4GAT1-Mutant	B4GAT1
1	SO	JJ092	-17.047226000000006	B4GAT1M155T/M155T	B4GAT1-Mutant	B4GAT1
1	SO	JJ093	-72.27927033333332	WT	B4GAT1-Ctrl	B4GAT1
1	SO	JJ094	-81.09989033333333	WT	B4GAT1-Ctrl	B4GAT1
1	SO	JJ095	-79.71982399999999	WT	B4GAT1-Ctrl	B4GAT1
1	SO	JJ096	-64.49059866666666	WT	B4GAT1-Ctrl	B4GAT1
1	SO	JJ101	116.120493	WT	B4GAT1-Ctrl	B4GAT1
1	SO	JJ102	-57.03999766666666	WT	B4GAT1-Ctrl	B4GAT1
1	SO	JJ103	24.308096999999993	WT	B4GAT1-Ctrl	B4GAT1
1	SO	JJ104	-50.46217266666665	WT	B4GAT1-Ctrl	B4GAT1
1	SO	JJ111	98.26314466666666	Emx-Cre+;DGF/-	Emx-DG-cKO	Emx-DG
1	SO	JJ112	81.71921733333335	Emx-Cre+;DGF/-	Emx-DG-cKO	Emx-DG
1	SO	JJ113	57.015002333333335	Emx-Cre+;DGF/-	Emx-DG-cKO	Emx-DG
1	SO	JJ118	85.71411366666665	Emx-Cre+;DGF/-	Emx-DG-cKO	Emx-DG
1	SO	JJ119	18.76411166666668	Emx-Cre+;DGF/-	Emx-DG-cKO	Emx-DG
1	SO	JJ120	-27.33243900000001	Emx-Cre+;DGF/-	Emx-DG-cKO	Emx-DG
1	SO	JJ121	34.92636333333332	Emx-Cre+;DGF/-	Emx-DG-cKO	Emx-DG
1	SO	JJ134	-87.40932966666666	Emx-Cre+;DGF/+	Emx-DG-Ctrl	Emx-DG
1	SO	JJ135	-16.885447	Emx-Cre+;DGF/+	Emx-DG-Ctrl	Emx-DG
1	SO	JJ136	5.45964566666666	Emx-Cre+;DGF/+	Emx-DG-Ctrl	Emx-DG
1	SO	JJ137	-14.617631999999995	Emx-Cre+;DGF/+	Emx-DG-Ctrl	Emx-DG
1	SO	JJ150	162.32611566666668	Emx-Cre+;POMT2F/F	Emx-POMT2-cKO	Emx-POMT2
1	SO	JJ151	162.084098	Emx-Cre+;POMT2F/F	Emx-POMT2-cKO	Emx-POMT2
1	SO	JJ152	265.67105333333336	Emx-Cre+;POMT2F/F	Emx-POMT2-cKO	Emx-POMT2
1	SO	JJ153	112.74684166666668	Emx-Cre+;POMT2F/F	Emx-POMT2-cKO	Emx-POMT2
1	SO	JJ154	-48.34872100000001	Emx-Cre+;POMT2F/+	Emx-POMT2-Ctrl	Emx-POMT2
1	SO	JJ155	-84.12333633333334	Emx-Cre+;POMT2F/+	Emx-POMT2-Ctrl	Emx-POMT2
1	SO	JJ156	-44.60236666666669	Emx-Cre+;POMT2F/+	Emx-POMT2-Ctrl	Emx-POMT2
1	SO	JJ157	-101.124104	Emx-Cre+;POMT2F/+	Emx-POMT2-Ctrl	Emx-POMT2
1	SO	JJ227	69.41724800000001	Emx-Cre+;POMT2F/F	Emx-POMT2-cKO	Emx-POMT2
1	SO	JJ228	19.60185333333332	Emx-Cre+;POMT2F/F	Emx-POMT2-cKO	Emx-POMT2
1	SO	JJ229	-1.693289666666658	Emx-Cre+;POMT2F/F	Emx-POMT2-cKO	Emx-POMT2
1	SO	JJ230	-15.251981999999998	Emx-Cre+;POMT2F/F	Emx-POMT2-cKO	Emx-POMT2
1	SO	JJ235	-31.647069999999996	Emx-Cre+;POMT2F/+	Emx-POMT2-Ctrl	Emx-POMT2
1	SO	JJ236	-26.541945666666674	Emx-Cre+;POMT2F/+	Emx-POMT2-Ctrl	Emx-POMT2
1	SO	JJ237	-10.94637000000001	Emx-Cre+;POMT2F/+	Emx-POMT2-Ctrl	Emx-POMT2
1	SO	JJ238	2.142187000000007	Emx-Cre+;POMT2F/+	Emx-POMT2-Ctrl	Emx-POMT2
1	SO	JJ243	-15.942665000000014	Emx-Cre+;POMT2F/+	Emx-POMT2-Ctrl	Emx-POMT2
1	SO	JJ244	-43.202783666666676	Emx-Cre+;POMT2F/+	Emx-POMT2-Ctrl	Emx-POMT2
1	SO	JJ245	-27.54761799999999	Emx-Cre+;POMT2F/+	Emx-POMT2-Ctrl	Emx-POMT2
1	SO	JJ246	-18.787445666666674	Emx-Cre+;POMT2F/+	Emx-POMT2-Ctrl	Emx-POMT2
1	SO	JJ247	-16.637282333333342	FKRPMut	FKRP-Mutant	FKRP
1	SO	JJ248	-12.734068666666673	FKRPMut	FKRP-Mutant	FKRP
1	SO	JJ249	-10.816818666666649	FKRPMut	FKRP-Mutant	FKRP
1	SO	JJ250	-20.611063666666656	FKRPMut	FKRP-Mutant	FKRP
1	SO	JJ251	1.1231770000000079	WT	FKRP-Ctrl	FKRP
1	SO	JJ252	-25.541290000000004	WT	FKRP-Ctrl	FKRP
1	SO	JJ253	-14.162415333333342	WT	FKRP-Ctrl	FKRP
1	SO	JJ254	-16.858810000000005	WT	FKRP-Ctrl	FKRP
1	SO	JJ255	-93.07798333333332	WT	FKRP-Ctrl	FKRP
1	SO	JJ256	3.243532666666681	WT	FKRP-Ctrl	FKRP
1	SO	JJ257	-80.59713333333336	WT	FKRP-Ctrl	FKRP
1	SO	JJ258	-0.9667386666666667	WT	FKRP-Ctrl	FKRP
1	SO	JJ259	-30.151176666666647	FKRPMut	FKRP-Mutant	FKRP
1	SO	JJ260	2.097317000000013	FKRPMut	FKRP-Mutant	FKRP
1	SO	JJ261	-35.11790099999999	FKRPMut	FKRP-Mutant	FKRP
1	SO	JJ262	-13.928505333333343	FKRPMut	FKRP-Mutant	FKRP
1	SO	JJ263	-43.33924933333336	WT	FKRP-Ctrl	FKRP
1	SO	JJ264	-24.72882499999999	WT	FKRP-Ctrl	FKRP
1	SO	JJ265	-24.955782	WT	FKRP-Ctrl	FKRP
1	SO	JJ266	-48.21991666666668	WT	FKRP-Ctrl	FKRP
1	SO	JJ299	-25.856342666666666	DGdelta/-	ICD-Mutant	ICD
1	SO	JJ300	4.323733333333337	DGdelta/-	ICD-Mutant	ICD
1	SO	JJ301	-37.366321333333325	DGdelta/-	ICD-Mutant	ICD
1	SO	JJ302	27.740160666666668	DGdelta/-	ICD-Mutant	ICD
1	SO	JJ307	-31.97442899999997	WT	ICD-Ctrl	ICD
1	SO	JJ308	-31.198435666666644	WT	ICD-Ctrl	ICD
1	SO	JJ309	-26.32731633333333	WT	ICD-Ctrl	ICD
1	SO	JJ310	-37.05213999999999	WT	ICD-Ctrl	ICD
1	SO	JJ331	-62.72434800000001	DGdelta/-	ICD-Mutant	ICD
1	SO	JJ332	2.4680563333333225	DGdelta/-	ICD-Mutant	ICD
1	SO	JJ333	-50.18512066666665	DGdelta/-	ICD-Mutant	ICD
1	SO	JJ334	-98.10892533333332	DGdelta/-	ICD-Mutant	ICD
1	SO	JJ339	-36.736826999999984	DGdelta/-	ICD-Mutant	ICD
1	SO	JJ340	-17.484206666666655	DGdelta/-	ICD-Mutant	ICD
1	SO	JJ341	-33.915730999999994	DGdelta/-	ICD-Mutant	ICD
1	SO	JJ342	-52.825643333333346	DGdelta/-	ICD-Mutant	ICD
1	SO	JJ347	4.987916333333335	WT	ICD-Ctrl	ICD
1	SO	JJ348	-14.84395733333333	WT	ICD-Ctrl	ICD
1	SO	JJ349	-34.98070333333334	WT	ICD-Ctrl	ICD
1	SO	JJ350	-28.7988	WT	ICD-Ctrl	ICD
1	SO	JJ355	-36.35055066666667	WT	ICD-Ctrl	ICD
1	SO	JJ356	-55.310353333333325	WT	ICD-Ctrl	ICD
1	SO	JJ357	-38.944340000000004	WT	ICD-Ctrl	ICD
1	SO	JJ358	-43.07780733333334	WT	ICD-Ctrl	ICD
1	SO	JJ362	-36.036290333333305	FKRPMut	FKRP-Mutant	FKRP
1	SO	JJ363	-6.00419233333335	FKRPMut	FKRP-Mutant	FKRP
1	SO	JJ364	-14.608309333333315	FKRPMut	FKRP-Mutant	FKRP
1	SO	JJ365	8.120038666666659	FKRPMut	FKRP-Mutant	FKRP
1	SO	JJ369	-72.244547	WT	FKRP-Ctrl	FKRP
1	SO	JJ370	-33.93561399999999	WT	FKRP-Ctrl	FKRP
1	SO	JJ371	-62.04335266666669	WT	FKRP-Ctrl	FKRP
1	SO	JJ372	-53.11534166666666	WT	FKRP-Ctrl	FKRP
1	SO	JJ373	74.04348599999997	Emx-Cre+;DGF/-	Emx-DG-cKO	Emx-DG
1	SO	JJ374	48.433073666666665	Emx-Cre+;DGF/-	Emx-DG-cKO	Emx-DG
1	SO	JJ375	68.77442866666668	Emx-Cre+;DGF/-	Emx-DG-cKO	Emx-DG
1	SO	JJ376	30.549191000000008	Emx-Cre+;DGF/-	Emx-DG-cKO	Emx-DG
1	SO	JJ377	44.04709033333332	Emx-Cre+;DGF/-	Emx-DG-cKO	Emx-DG
1	SO	JJ378	45.75766400000001	Emx-Cre+;DGF/-	Emx-DG-cKO	Emx-DG
1	SO	JJ379	17.09990666666668	Emx-Cre+;DGF/-	Emx-DG-cKO	Emx-DG
1	SO	JJ380	22.932058	Emx-Cre+;DGF/-	Emx-DG-cKO	Emx-DG
1	SO	JJ381	-47.51760166666668	Emx-Cre+;DGF/+	Emx-DG-Ctrl	Emx-DG
1	SO	JJ382	-36.92366666666667	Emx-Cre+;DGF/+	Emx-DG-Ctrl	Emx-DG
1	SO	JJ384	-16.68620633333333	Emx-Cre+;DGF/+	Emx-DG-Ctrl	Emx-DG
1	SO	JJ385	-55.09024400000001	Emx-Cre+;DGF/-	Emx-DG-cKO	Emx-DG
1	SO	JJ386	-33.315599500000005	Emx-Cre+;DGF/-	Emx-DG-cKO	Emx-DG
1	SO	JJ387	18.926844000000003	Emx-Cre+;DGF/-	Emx-DG-cKO	Emx-DG
1	SO	JJ388	6.645728500000014	Emx-Cre+;DGF/+	Emx-DG-Ctrl	Emx-DG
1	SO	JJ388	6.645728500000014	Emx-Cre+;DGF/+	Emx-DG-Ctrl	Emx-DG
1	SO	JJ389	73.13588000000003	Emx-Cre+;DGF/+	Emx-DG-Ctrl	Emx-DG
1	SO	JJ390	32.065113	Emx-Cre+;DGF/+	Emx-DG-Ctrl	Emx-DG
1	SO	JJ391	12.981362666666664	Emx-Cre+;DGF/+	Emx-DG-Ctrl	Emx-DG
1	SO	JJ392	-22.349298000000005	Emx-Cre+;DGF/+	Emx-DG-Ctrl	Emx-DG
2	SO	JJ001	-52.75226233333333	Emx-Cre+;POMT2F/+	Emx-POMT2-Ctrl	Emx-POMT2
2	SO	JJ002	43.14715433333331	Emx-Cre+;POMT2F/F	Emx-POMT2-cKO	Emx-POMT2
2	SO	JJ003	-20.30876933333332	Emx-Cre+;POMT2F/+	Emx-POMT2-Ctrl	Emx-POMT2
2	SO	JJ004	-47.02810133333333	Emx-Cre+;POMT2F/+	Emx-POMT2-Ctrl	Emx-POMT2
2	SO	JJ005	-41.18014866666667	Emx-Cre+;POMT2F/+	Emx-POMT2-Ctrl	Emx-POMT2
2	SO	JJ006	-2.987012333333316	Emx-Cre+;POMT2F/F	Emx-POMT2-cKO	Emx-POMT2
2	SO	JJ007	-9.468737999999993	Emx-Cre+;POMT2F/F	Emx-POMT2-cKO	Emx-POMT2
2	SO	JJ008	-40.423397333333334	Emx-Cre+;POMT2F/F	Emx-POMT2-cKO	Emx-POMT2
2	SO	JJ029	-51.82279300000001	WT	B4GAT1-Ctrl	B4GAT1
2	SO	JJ030	-64.46789533333333	WT	B4GAT1-Ctrl	B4GAT1
2	SO	JJ031	-54.819780000000016	WT	B4GAT1-Ctrl	B4GAT1
2	SO	JJ032	-73.37973733333335	WT	B4GAT1-Ctrl	B4GAT1
2	SO	JJ033	-16.226224333333345	B4GAT1M155T/M155T	B4GAT1-Mutant	B4GAT1
2	SO	JJ034	-34.930794666666664	B4GAT1M155T/M155T	B4GAT1-Mutant	B4GAT1
2	SO	JJ035	32.402951333333284	B4GAT1M155T/M155T	B4GAT1-Mutant	B4GAT1
2	SO	JJ036	38.32150999999999	B4GAT1M155T/M155T	B4GAT1-Mutant	B4GAT1
2	SO	JJ061	-17.197178666666673	B4GAT1M155T/M155T	B4GAT1-Mutant	B4GAT1
2	SO	JJ062	-20.77387966666667	B4GAT1M155T/M155T	B4GAT1-Mutant	B4GAT1
2	SO	JJ063	-17.75297599999999	B4GAT1M155T/M155T	B4GAT1-Mutant	B4GAT1
2	SO	JJ064	-9.270122999999993	B4GAT1M155T/M155T	B4GAT1-Mutant	B4GAT1
2	SO	JJ065	-13.005688666666666	B4GAT1M155T/M155T	B4GAT1-Mutant	B4GAT1
2	SO	JJ066	2.383791000000002	B4GAT1M155T/M155T	B4GAT1-Mutant	B4GAT1
2	SO	JJ067	-31.280832000000014	B4GAT1M155T/M155T	B4GAT1-Mutant	B4GAT1
2	SO	JJ068	-35.640568	B4GAT1M155T/M155T	B4GAT1-Mutant	B4GAT1
2	SO	JJ077	4.743158666666663	B4GAT1M155T/M155T	B4GAT1-Mutant	B4GAT1
2	SO	JJ078	-44.151568000000005	B4GAT1M155T/M155T	B4GAT1-Mutant	B4GAT1
2	SO	JJ079	133.303552	B4GAT1M155T/M155T	B4GAT1-Mutant	B4GAT1
2	SO	JJ080	16.24113833333333	B4GAT1M155T/M155T	B4GAT1-Mutant	B4GAT1
2	SO	JJ089	80.51040299999998	B4GAT1M155T/M155T	B4GAT1-Mutant	B4GAT1
2	SO	JJ090	49.57614299999998	B4GAT1M155T/M155T	B4GAT1-Mutant	B4GAT1
2	SO	JJ091	46.63311566666667	B4GAT1M155T/M155T	B4GAT1-Mutant	B4GAT1
2	SO	JJ092	-5.483526000000002	B4GAT1M155T/M155T	B4GAT1-Mutant	B4GAT1
2	SO	JJ093	-76.11458699999999	WT	B4GAT1-Ctrl	B4GAT1
2	SO	JJ094	-90.26674033333332	WT	B4GAT1-Ctrl	B4GAT1
2	SO	JJ095	-69.97375733333332	WT	B4GAT1-Ctrl	B4GAT1
2	SO	JJ096	-68.941732	WT	B4GAT1-Ctrl	B4GAT1
2	SO	JJ101	25.606942999999983	WT	B4GAT1-Ctrl	B4GAT1
2	SO	JJ102	-51.55439766666664	WT	B4GAT1-Ctrl	B4GAT1
2	SO	JJ103	41.767880333333345	WT	B4GAT1-Ctrl	B4GAT1
2	SO	JJ104	-51.656639333333345	WT	B4GAT1-Ctrl	B4GAT1
2	SO	JJ111	146.77962800000003	Emx-Cre+;DGF/-	Emx-DG-cKO	Emx-DG
2	SO	JJ112	68.532134	Emx-Cre+;DGF/-	Emx-DG-cKO	Emx-DG
2	SO	JJ113	83.06855233333336	Emx-Cre+;DGF/-	Emx-DG-cKO	Emx-DG
2	SO	JJ118	95.14664699999997	Emx-Cre+;DGF/-	Emx-DG-cKO	Emx-DG
2	SO	JJ119	18.42547833333333	Emx-Cre+;DGF/-	Emx-DG-cKO	Emx-DG
2	SO	JJ120	-6.659339000000017	Emx-Cre+;DGF/-	Emx-DG-cKO	Emx-DG
2	SO	JJ121	31.513246666666664	Emx-Cre+;DGF/-	Emx-DG-cKO	Emx-DG
2	SO	JJ134	-78.28566299999999	Emx-Cre+;DGF/+	Emx-DG-Ctrl	Emx-DG
2	SO	JJ135	-18.02519699999999	Emx-Cre+;DGF/+	Emx-DG-Ctrl	Emx-DG
2	SO	JJ136	-10.936870999999996	Emx-Cre+;DGF/+	Emx-DG-Ctrl	Emx-DG
2	SO	JJ137	-31.86771533333332	Emx-Cre+;DGF/+	Emx-DG-Ctrl	Emx-DG
2	SO	JJ150	142.1260823333333	Emx-Cre+;POMT2F/F	Emx-POMT2-cKO	Emx-POMT2
2	SO	JJ151	83.93891466666663	Emx-Cre+;POMT2F/F	Emx-POMT2-cKO	Emx-POMT2
2	SO	JJ152	158.15147	Emx-Cre+;POMT2F/F	Emx-POMT2-cKO	Emx-POMT2
2	SO	JJ153	110.12899166666669	Emx-Cre+;POMT2F/F	Emx-POMT2-cKO	Emx-POMT2
2	SO	JJ154	-33.87150433333333	Emx-Cre+;POMT2F/+	Emx-POMT2-Ctrl	Emx-POMT2
2	SO	JJ155	-77.91885299999997	Emx-Cre+;POMT2F/+	Emx-POMT2-Ctrl	Emx-POMT2
2	SO	JJ156	-44.42226666666668	Emx-Cre+;POMT2F/+	Emx-POMT2-Ctrl	Emx-POMT2
2	SO	JJ157	-87.75388733333334	Emx-Cre+;POMT2F/+	Emx-POMT2-Ctrl	Emx-POMT2
2	SO	JJ227	52.68793133333333	Emx-Cre+;POMT2F/F	Emx-POMT2-cKO	Emx-POMT2
2	SO	JJ228	27.141153333333325	Emx-Cre+;POMT2F/F	Emx-POMT2-cKO	Emx-POMT2
2	SO	JJ229	-3.7249730000000056	Emx-Cre+;POMT2F/F	Emx-POMT2-cKO	Emx-POMT2
2	SO	JJ230	-8.637815333333341	Emx-Cre+;POMT2F/F	Emx-POMT2-cKO	Emx-POMT2
2	SO	JJ235	-28.915903333333336	Emx-Cre+;POMT2F/+	Emx-POMT2-Ctrl	Emx-POMT2
2	SO	JJ236	-18.44106233333333	Emx-Cre+;POMT2F/+	Emx-POMT2-Ctrl	Emx-POMT2
2	SO	JJ237	2.566763333333332	Emx-Cre+;POMT2F/+	Emx-POMT2-Ctrl	Emx-POMT2
2	SO	JJ238	-8.444312999999994	Emx-Cre+;POMT2F/+	Emx-POMT2-Ctrl	Emx-POMT2
2	SO	JJ243	6.501368333333327	Emx-Cre+;POMT2F/+	Emx-POMT2-Ctrl	Emx-POMT2
2	SO	JJ244	-31.184567000000015	Emx-Cre+;POMT2F/+	Emx-POMT2-Ctrl	Emx-POMT2
2	SO	JJ245	-25.625018	Emx-Cre+;POMT2F/+	Emx-POMT2-Ctrl	Emx-POMT2
2	SO	JJ246	-20.406829000000005	Emx-Cre+;POMT2F/+	Emx-POMT2-Ctrl	Emx-POMT2
2	SO	JJ247	-46.31344899999999	FKRPMut	FKRP-Mutant	FKRP
2	SO	JJ248	-2.488652000000002	FKRPMut	FKRP-Mutant	FKRP
2	SO	JJ249	-6.0672853333333405	FKRPMut	FKRP-Mutant	FKRP
2	SO	JJ250	-4.551763666666669	FKRPMut	FKRP-Mutant	FKRP
2	SO	JJ251	-21.351123000000012	WT	FKRP-Ctrl	FKRP
2	SO	JJ252	-16.860690000000005	WT	FKRP-Ctrl	FKRP
2	SO	JJ253	3.7475180000000043	WT	FKRP-Ctrl	FKRP
2	SO	JJ254	-5.419976666666675	WT	FKRP-Ctrl	FKRP
2	SO	JJ255	-82.0773	WT	FKRP-Ctrl	FKRP
2	SO	JJ256	5.969515999999999	WT	FKRP-Ctrl	FKRP
2	SO	JJ257	-84.91933333333336	WT	FKRP-Ctrl	FKRP
2	SO	JJ258	-0.00887199999999666	WT	FKRP-Ctrl	FKRP
2	SO	JJ259	-23.948476666666654	FKRPMut	FKRP-Mutant	FKRP
2	SO	JJ260	-5.4622663333333135	FKRPMut	FKRP-Mutant	FKRP
2	SO	JJ261	-40.81173433333333	FKRPMut	FKRP-Mutant	FKRP
2	SO	JJ262	-23.566238666666674	FKRPMut	FKRP-Mutant	FKRP
2	SO	JJ263	-37.738382666666666	WT	FKRP-Ctrl	FKRP
2	SO	JJ264	-35.04134166666665	WT	FKRP-Ctrl	FKRP
2	SO	JJ265	10.770184666666657	WT	FKRP-Ctrl	FKRP
2	SO	JJ266	-41.692050000000016	WT	FKRP-Ctrl	FKRP
2	SO	JJ299	-8.78704266666667	DGdelta/-	ICD-Mutant	ICD
2	SO	JJ300	-3.0536833333333675	DGdelta/-	ICD-Mutant	ICD
2	SO	JJ301	-11.770321333333337	DGdelta/-	ICD-Mutant	ICD
2	SO	JJ302	-43.350139333333345	DGdelta/-	ICD-Mutant	ICD
2	SO	JJ307	-28.385379	WT	ICD-Ctrl	ICD
2	SO	JJ308	-14.11525233333335	WT	ICD-Ctrl	ICD
2	SO	JJ309	-4.6586163333333275	WT	ICD-Ctrl	ICD
2	SO	JJ310	-21.75875666666667	WT	ICD-Ctrl	ICD
2	SO	JJ331	-71.16538133333336	DGdelta/-	ICD-Mutant	ICD
2	SO	JJ332	0.7215063333333281	DGdelta/-	ICD-Mutant	ICD
2	SO	JJ333	-16.557303999999988	DGdelta/-	ICD-Mutant	ICD
2	SO	JJ334	-101.04882533333331	DGdelta/-	ICD-Mutant	ICD
2	SO	JJ339	-30.474376999999986	DGdelta/-	ICD-Mutant	ICD
2	SO	JJ340	12.919960000000023	DGdelta/-	ICD-Mutant	ICD
2	SO	JJ341	-41.03811433333332	DGdelta/-	ICD-Mutant	ICD
2	SO	JJ342	-59.81567666666666	DGdelta/-	ICD-Mutant	ICD
2	SO	JJ347	-7.816350333333323	WT	ICD-Ctrl	ICD
2	SO	JJ348	-12.345340666666687	WT	ICD-Ctrl	ICD
2	SO	JJ349	-31.75360333333335	WT	ICD-Ctrl	ICD
2	SO	JJ350	-30.22473333333333	WT	ICD-Ctrl	ICD
2	SO	JJ355	-21.93740066666666	WT	ICD-Ctrl	ICD
2	SO	JJ356	-50.74662	WT	ICD-Ctrl	ICD
2	SO	JJ357	-16.44810666666667	WT	ICD-Ctrl	ICD
2	SO	JJ358	-40.866490666666685	WT	ICD-Ctrl	ICD
2	SO	JJ362	-27.762290333333322	FKRPMut	FKRP-Mutant	FKRP
2	SO	JJ363	-6.726775666666678	FKRPMut	FKRP-Mutant	FKRP
2	SO	JJ364	-19.135342666666634	FKRPMut	FKRP-Mutant	FKRP
2	SO	JJ365	6.172155333333336	FKRPMut	FKRP-Mutant	FKRP
2	SO	JJ369	-53.52279699999999	WT	FKRP-Ctrl	FKRP
2	SO	JJ370	-25.943230666666654	WT	FKRP-Ctrl	FKRP
2	SO	JJ371	-55.55275266666667	WT	FKRP-Ctrl	FKRP
2	SO	JJ372	-53.31160833333331	WT	FKRP-Ctrl	FKRP
2	SO	JJ373	85.84831933333334	Emx-Cre+;DGF/-	Emx-DG-cKO	Emx-DG
2	SO	JJ374	32.97197366666668	Emx-Cre+;DGF/-	Emx-DG-cKO	Emx-DG
2	SO	JJ375	66.99807866666666	Emx-Cre+;DGF/-	Emx-DG-cKO	Emx-DG
2	SO	JJ376	12.974574333333313	Emx-Cre+;DGF/-	Emx-DG-cKO	Emx-DG
2	SO	JJ377	24.087623666666673	Emx-Cre+;DGF/-	Emx-DG-cKO	Emx-DG
2	SO	JJ378	42.49793066666666	Emx-Cre+;DGF/-	Emx-DG-cKO	Emx-DG
2	SO	JJ379	10.355456666666678	Emx-Cre+;DGF/-	Emx-DG-cKO	Emx-DG
2	SO	JJ380	46.80894133333336	Emx-Cre+;DGF/-	Emx-DG-cKO	Emx-DG
2	SO	JJ381	-40.061985	Emx-Cre+;DGF/+	Emx-DG-Ctrl	Emx-DG
2	SO	JJ382	-24.619399999999995	Emx-Cre+;DGF/+	Emx-DG-Ctrl	Emx-DG
2	SO	JJ384	-25.039373	Emx-Cre+;DGF/+	Emx-DG-Ctrl	Emx-DG
2	SO	JJ385	-57.43484400000001	Emx-Cre+;DGF/-	Emx-DG-cKO	Emx-DG
2	SO	JJ386	-33.3300745	Emx-Cre+;DGF/-	Emx-DG-cKO	Emx-DG
2	SO	JJ387	21.442193999999986	Emx-Cre+;DGF/-	Emx-DG-cKO	Emx-DG
2	SO	JJ388	-2.809396499999991	Emx-Cre+;DGF/+	Emx-DG-Ctrl	Emx-DG
2	SO	JJ388	-2.809396499999991	Emx-Cre+;DGF/+	Emx-DG-Ctrl	Emx-DG
2	SO	JJ389	68.12914666666666	Emx-Cre+;DGF/+	Emx-DG-Ctrl	Emx-DG
2	SO	JJ390	32.990162999999995	Emx-Cre+;DGF/+	Emx-DG-Ctrl	Emx-DG
2	SO	JJ391	17.94962933333335	Emx-Cre+;DGF/+	Emx-DG-Ctrl	Emx-DG
2	SO	JJ392	-16.80431466666668	Emx-Cre+;DGF/+	Emx-DG-Ctrl	Emx-DG
3	SO	JJ001	-51.50039566666666	Emx-Cre+;POMT2F/+	Emx-POMT2-Ctrl	Emx-POMT2
3	SO	JJ002	44.416054333333335	Emx-Cre+;POMT2F/F	Emx-POMT2-cKO	Emx-POMT2
3	SO	JJ003	-23.84056933333333	Emx-Cre+;POMT2F/+	Emx-POMT2-Ctrl	Emx-POMT2
3	SO	JJ004	-46.842217999999995	Emx-Cre+;POMT2F/+	Emx-POMT2-Ctrl	Emx-POMT2
3	SO	JJ005	-41.973881999999996	Emx-Cre+;POMT2F/+	Emx-POMT2-Ctrl	Emx-POMT2
3	SO	JJ006	42.174671	Emx-Cre+;POMT2F/F	Emx-POMT2-cKO	Emx-POMT2
3	SO	JJ007	2.1422286666666728	Emx-Cre+;POMT2F/F	Emx-POMT2-cKO	Emx-POMT2
3	SO	JJ008	-13.991880666666674	Emx-Cre+;POMT2F/F	Emx-POMT2-cKO	Emx-POMT2
3	SO	JJ029	-51.605943	WT	B4GAT1-Ctrl	B4GAT1
3	SO	JJ030	-78.25594533333333	WT	B4GAT1-Ctrl	B4GAT1
3	SO	JJ031	-54.97634666666667	WT	B4GAT1-Ctrl	B4GAT1
3	SO	JJ032	-84.70382066666667	WT	B4GAT1-Ctrl	B4GAT1
3	SO	JJ033	-7.327574333333331	B4GAT1M155T/M155T	B4GAT1-Mutant	B4GAT1
3	SO	JJ034	-22.782711333333328	B4GAT1M155T/M155T	B4GAT1-Mutant	B4GAT1
3	SO	JJ035	30.455068	B4GAT1M155T/M155T	B4GAT1-Mutant	B4GAT1
3	SO	JJ036	26.519709999999993	B4GAT1M155T/M155T	B4GAT1-Mutant	B4GAT1
3	SO	JJ061	-25.63176200000001	B4GAT1M155T/M155T	B4GAT1-Mutant	B4GAT1
3	SO	JJ062	-22.108146333333337	B4GAT1M155T/M155T	B4GAT1-Mutant	B4GAT1
3	SO	JJ063	-32.911425999999985	B4GAT1M155T/M155T	B4GAT1-Mutant	B4GAT1
3	SO	JJ064	-6.311506333333322	B4GAT1M155T/M155T	B4GAT1-Mutant	B4GAT1
3	SO	JJ065	-12.905038666666675	B4GAT1M155T/M155T	B4GAT1-Mutant	B4GAT1
3	SO	JJ066	8.433724333333345	B4GAT1M155T/M155T	B4GAT1-Mutant	B4GAT1
3	SO	JJ067	-33.158965333333335	B4GAT1M155T/M155T	B4GAT1-Mutant	B4GAT1
3	SO	JJ068	-40.57126800000001	B4GAT1M155T/M155T	B4GAT1-Mutant	B4GAT1
3	SO	JJ077	10.462742	B4GAT1M155T/M155T	B4GAT1-Mutant	B4GAT1
3	SO	JJ078	-41.76246799999999	B4GAT1M155T/M155T	B4GAT1-Mutant	B4GAT1
3	SO	JJ079	37.397668666666675	B4GAT1M155T/M155T	B4GAT1-Mutant	B4GAT1
3	SO	JJ080	14.867004999999986	B4GAT1M155T/M155T	B4GAT1-Mutant	B4GAT1
3	SO	JJ089	116.96850299999998	B4GAT1M155T/M155T	B4GAT1-Mutant	B4GAT1
3	SO	JJ090	16.716059666666666	B4GAT1M155T/M155T	B4GAT1-Mutant	B4GAT1
3	SO	JJ091	66.50269899999999	B4GAT1M155T/M155T	B4GAT1-Mutant	B4GAT1
3	SO	JJ092	-4.539959333333343	B4GAT1M155T/M155T	B4GAT1-Mutant	B4GAT1
3	SO	JJ093	-68.93287033333333	WT	B4GAT1-Ctrl	B4GAT1
3	SO	JJ094	-89.32589033333332	WT	B4GAT1-Ctrl	B4GAT1
3	SO	JJ095	-52.47429066666666	WT	B4GAT1-Ctrl	B4GAT1
3	SO	JJ096	-58.43933199999998	WT	B4GAT1-Ctrl	B4GAT1
3	SO	JJ101	-25.78737366666665	WT	B4GAT1-Ctrl	B4GAT1
3	SO	JJ102	-68.75819766666665	WT	B4GAT1-Ctrl	B4GAT1
3	SO	JJ103	29.529230333333356	WT	B4GAT1-Ctrl	B4GAT1
3	SO	JJ104	-55.173505999999996	WT	B4GAT1-Ctrl	B4GAT1
3	SO	JJ111	148.86547799999997	Emx-Cre+;DGF/-	Emx-DG-cKO	Emx-DG
3	SO	JJ112	73.646684	Emx-Cre+;DGF/-	Emx-DG-cKO	Emx-DG
3	SO	JJ113	96.62000233333335	Emx-Cre+;DGF/-	Emx-DG-cKO	Emx-DG
3	SO	JJ118	86.54504699999997	Emx-Cre+;DGF/-	Emx-DG-cKO	Emx-DG
3	SO	JJ119	4.319444999999992	Emx-Cre+;DGF/-	Emx-DG-cKO	Emx-DG
3	SO	JJ120	-28.67163900000001	Emx-Cre+;DGF/-	Emx-DG-cKO	Emx-DG
3	SO	JJ121	58.151296666666646	Emx-Cre+;DGF/-	Emx-DG-cKO	Emx-DG
3	SO	JJ134	-36.758529666666654	Emx-Cre+;DGF/+	Emx-DG-Ctrl	Emx-DG
3	SO	JJ135	3.5399530000000063	Emx-Cre+;DGF/+	Emx-DG-Ctrl	Emx-DG
3	SO	JJ136	-23.144087666666668	Emx-Cre+;DGF/+	Emx-DG-Ctrl	Emx-DG
3	SO	JJ137	-32.83803199999999	Emx-Cre+;DGF/+	Emx-DG-Ctrl	Emx-DG
3	SO	JJ150	87.96598233333334	Emx-Cre+;POMT2F/F	Emx-POMT2-cKO	Emx-POMT2
3	SO	JJ151	129.05483133333334	Emx-Cre+;POMT2F/F	Emx-POMT2-cKO	Emx-POMT2
3	SO	JJ152	145.05732	Emx-Cre+;POMT2F/F	Emx-POMT2-cKO	Emx-POMT2
3	SO	JJ153	100.69004166666666	Emx-Cre+;POMT2F/F	Emx-POMT2-cKO	Emx-POMT2
3	SO	JJ154	-45.02425433333335	Emx-Cre+;POMT2F/+	Emx-POMT2-Ctrl	Emx-POMT2
3	SO	JJ155	-87.71593633333333	Emx-Cre+;POMT2F/+	Emx-POMT2-Ctrl	Emx-POMT2
3	SO	JJ156	-22.296966666666673	Emx-Cre+;POMT2F/+	Emx-POMT2-Ctrl	Emx-POMT2
3	SO	JJ157	-59.43163733333335	Emx-Cre+;POMT2F/+	Emx-POMT2-Ctrl	Emx-POMT2
3	SO	JJ227	36.954381333333345	Emx-Cre+;POMT2F/F	Emx-POMT2-cKO	Emx-POMT2
3	SO	JJ228	51.50258666666665	Emx-Cre+;POMT2F/F	Emx-POMT2-cKO	Emx-POMT2
3	SO	JJ229	41.043243666666676	Emx-Cre+;POMT2F/F	Emx-POMT2-cKO	Emx-POMT2
3	SO	JJ230	18.58908466666665	Emx-Cre+;POMT2F/F	Emx-POMT2-cKO	Emx-POMT2
3	SO	JJ235	-25.02233666666667	Emx-Cre+;POMT2F/+	Emx-POMT2-Ctrl	Emx-POMT2
3	SO	JJ236	-21.938079	Emx-Cre+;POMT2F/+	Emx-POMT2-Ctrl	Emx-POMT2
3	SO	JJ237	-14.886836666666673	Emx-Cre+;POMT2F/+	Emx-POMT2-Ctrl	Emx-POMT2
3	SO	JJ238	-10.637679666666665	Emx-Cre+;POMT2F/+	Emx-POMT2-Ctrl	Emx-POMT2
3	SO	JJ243	-27.510931666666682	Emx-Cre+;POMT2F/+	Emx-POMT2-Ctrl	Emx-POMT2
3	SO	JJ244	1.4454830000000054	Emx-Cre+;POMT2F/+	Emx-POMT2-Ctrl	Emx-POMT2
3	SO	JJ245	-20.06981800000001	Emx-Cre+;POMT2F/+	Emx-POMT2-Ctrl	Emx-POMT2
3	SO	JJ246	-24.88524566666668	Emx-Cre+;POMT2F/+	Emx-POMT2-Ctrl	Emx-POMT2
3	SO	JJ247	-54.87001566666667	FKRPMut	FKRP-Mutant	FKRP
3	SO	JJ248	-3.9890020000000086	FKRPMut	FKRP-Mutant	FKRP
3	SO	JJ249	-13.114418666666646	FKRPMut	FKRP-Mutant	FKRP
3	SO	JJ250	-23.92706366666666	FKRPMut	FKRP-Mutant	FKRP
3	SO	JJ251	-15.663356333333335	WT	FKRP-Ctrl	FKRP
3	SO	JJ252	-12.157623333333333	WT	FKRP-Ctrl	FKRP
3	SO	JJ253	-34.235282000000005	WT	FKRP-Ctrl	FKRP
3	SO	JJ254	-14.219210000000023	WT	FKRP-Ctrl	FKRP
3	SO	JJ255	-71.06378333333333	WT	FKRP-Ctrl	FKRP
3	SO	JJ256	-5.627667333333316	WT	FKRP-Ctrl	FKRP
3	SO	JJ257	-73.25933333333334	WT	FKRP-Ctrl	FKRP
3	SO	JJ258	-37.967338666666684	WT	FKRP-Ctrl	FKRP
3	SO	JJ259	-28.63164333333333	FKRPMut	FKRP-Mutant	FKRP
3	SO	JJ260	3.529783666666693	FKRPMut	FKRP-Mutant	FKRP
3	SO	JJ261	-30.026767666666654	FKRPMut	FKRP-Mutant	FKRP
3	SO	JJ262	-17.51170533333334	FKRPMut	FKRP-Mutant	FKRP
3	SO	JJ263	-37.732849333333355	WT	FKRP-Ctrl	FKRP
3	SO	JJ264	-29.34595833333333	WT	FKRP-Ctrl	FKRP
3	SO	JJ265	3.725684666666666	WT	FKRP-Ctrl	FKRP
3	SO	JJ266	-39.43805000000001	WT	FKRP-Ctrl	FKRP
3	SO	JJ299	33.75965733333334	DGdelta/-	ICD-Mutant	ICD
3	SO	JJ300	-20.772333333333354	DGdelta/-	ICD-Mutant	ICD
3	SO	JJ301	-25.858854666666655	DGdelta/-	ICD-Mutant	ICD
3	SO	JJ302	0.9166273333333379	DGdelta/-	ICD-Mutant	ICD
3	SO	JJ307	-19.078829000000002	WT	ICD-Ctrl	ICD
3	SO	JJ308	-6.058568999999996	WT	ICD-Ctrl	ICD
3	SO	JJ309	-18.743382999999994	WT	ICD-Ctrl	ICD
3	SO	JJ310	-22.450873333333334	WT	ICD-Ctrl	ICD
3	SO	JJ331	-68.49494800000001	DGdelta/-	ICD-Mutant	ICD
3	SO	JJ332	-3.9332770000000132	DGdelta/-	ICD-Mutant	ICD
3	SO	JJ333	-50.67465399999998	DGdelta/-	ICD-Mutant	ICD
3	SO	JJ334	-58.97805866666666	DGdelta/-	ICD-Mutant	ICD
3	SO	JJ339	-31.629960333333333	DGdelta/-	ICD-Mutant	ICD
3	SO	JJ340	15.045460000000011	DGdelta/-	ICD-Mutant	ICD
3	SO	JJ341	-48.83026433333331	DGdelta/-	ICD-Mutant	ICD
3	SO	JJ342	-38.63310999999999	DGdelta/-	ICD-Mutant	ICD
3	SO	JJ347	-2.4917503333333193	WT	ICD-Ctrl	ICD
3	SO	JJ348	-12.246357333333341	WT	ICD-Ctrl	ICD
3	SO	JJ349	-36.79763666666668	WT	ICD-Ctrl	ICD
3	SO	JJ350	-29.515666666666664	WT	ICD-Ctrl	ICD
3	SO	JJ355	-16.045017333333323	WT	ICD-Ctrl	ICD
3	SO	JJ356	-38.05721999999998	WT	ICD-Ctrl	ICD
3	SO	JJ357	-22.886539999999986	WT	ICD-Ctrl	ICD
3	SO	JJ358	-37.734274000000006	WT	ICD-Ctrl	ICD
3	SO	JJ362	-30.302623666666648	FKRPMut	FKRP-Mutant	FKRP
3	SO	JJ363	-5.382659000000028	FKRPMut	FKRP-Mutant	FKRP
3	SO	JJ364	-0.4811093333333171	FKRPMut	FKRP-Mutant	FKRP
3	SO	JJ365	-3.9014280000000006	FKRPMut	FKRP-Mutant	FKRP
3	SO	JJ369	-48.055413666666674	WT	FKRP-Ctrl	FKRP
3	SO	JJ370	-14.549680666666632	WT	FKRP-Ctrl	FKRP
3	SO	JJ371	-38.960952666666685	WT	FKRP-Ctrl	FKRP
3	SO	JJ372	-44.635274999999986	WT	FKRP-Ctrl	FKRP
3	SO	JJ373	90.55088599999998	Emx-Cre+;DGF/-	Emx-DG-cKO	Emx-DG
3	SO	JJ374	22.781207000000013	Emx-Cre+;DGF/-	Emx-DG-cKO	Emx-DG
3	SO	JJ375	89.60809533333334	Emx-Cre+;DGF/-	Emx-DG-cKO	Emx-DG
3	SO	JJ376	-21.01840899999999	Emx-Cre+;DGF/-	Emx-DG-cKO	Emx-DG
3	SO	JJ377	41.497090333333325	Emx-Cre+;DGF/-	Emx-DG-cKO	Emx-DG
3	SO	JJ378	29.401864000000007	Emx-Cre+;DGF/-	Emx-DG-cKO	Emx-DG
3	SO	JJ379	14.441373333333331	Emx-Cre+;DGF/-	Emx-DG-cKO	Emx-DG
3	SO	JJ380	36.741458	Emx-Cre+;DGF/-	Emx-DG-cKO	Emx-DG
3	SO	JJ381	-34.45200166666668	Emx-Cre+;DGF/+	Emx-DG-Ctrl	Emx-DG
3	SO	JJ382	-42.45513333333332	Emx-Cre+;DGF/+	Emx-DG-Ctrl	Emx-DG
3	SO	JJ384	-34.36853966666666	Emx-Cre+;DGF/+	Emx-DG-Ctrl	Emx-DG
3	SO	JJ385	-48.66164400000001	Emx-Cre+;DGF/-	Emx-DG-cKO	Emx-DG
3	SO	JJ386	-29.520699500000006	Emx-Cre+;DGF/-	Emx-DG-cKO	Emx-DG
3	SO	JJ387	13.337143999999995	Emx-Cre+;DGF/-	Emx-DG-cKO	Emx-DG
3	SO	JJ388	2.3364951666666656	Emx-Cre+;DGF/+	Emx-DG-Ctrl	Emx-DG
3	SO	JJ388	2.3364951666666656	Emx-Cre+;DGF/+	Emx-DG-Ctrl	Emx-DG
3	SO	JJ389	67.00027999999999	Emx-Cre+;DGF/+	Emx-DG-Ctrl	Emx-DG
3	SO	JJ390	20.982379666666674	Emx-Cre+;DGF/+	Emx-DG-Ctrl	Emx-DG
3	SO	JJ391	22.80056266666668	Emx-Cre+;DGF/+	Emx-DG-Ctrl	Emx-DG
3	SO	JJ392	-15.383898000000007	Emx-Cre+;DGF/+	Emx-DG-Ctrl	Emx-DG
4	SO	JJ001	-54.12384566666666	Emx-Cre+;POMT2F/+	Emx-POMT2-Ctrl	Emx-POMT2
4	SO	JJ002	76.03107099999998	Emx-Cre+;POMT2F/F	Emx-POMT2-cKO	Emx-POMT2
4	SO	JJ003	-22.736602666666656	Emx-Cre+;POMT2F/+	Emx-POMT2-Ctrl	Emx-POMT2
4	SO	JJ004	-30.637851333333327	Emx-Cre+;POMT2F/+	Emx-POMT2-Ctrl	Emx-POMT2
4	SO	JJ005	-39.961065333333345	Emx-Cre+;POMT2F/+	Emx-POMT2-Ctrl	Emx-POMT2
4	SO	JJ006	48.131154333333335	Emx-Cre+;POMT2F/F	Emx-POMT2-cKO	Emx-POMT2
4	SO	JJ007	7.535178666666667	Emx-Cre+;POMT2F/F	Emx-POMT2-cKO	Emx-POMT2
4	SO	JJ008	-22.190314	Emx-Cre+;POMT2F/F	Emx-POMT2-cKO	Emx-POMT2
4	SO	JJ029	-42.98820966666667	WT	B4GAT1-Ctrl	B4GAT1
4	SO	JJ030	-78.45289533333333	WT	B4GAT1-Ctrl	B4GAT1
4	SO	JJ031	-60.082613333333335	WT	B4GAT1-Ctrl	B4GAT1
4	SO	JJ032	-63.00190400000002	WT	B4GAT1-Ctrl	B4GAT1
4	SO	JJ033	-13.650974333333332	B4GAT1M155T/M155T	B4GAT1-Mutant	B4GAT1
4	SO	JJ034	-40.07304466666667	B4GAT1M155T/M155T	B4GAT1-Mutant	B4GAT1
4	SO	JJ035	56.662284666666665	B4GAT1M155T/M155T	B4GAT1-Mutant	B4GAT1
4	SO	JJ036	11.478593333333341	B4GAT1M155T/M155T	B4GAT1-Mutant	B4GAT1
4	SO	JJ061	-19.556261999999993	B4GAT1M155T/M155T	B4GAT1-Mutant	B4GAT1
4	SO	JJ062	-13.337796333333321	B4GAT1M155T/M155T	B4GAT1-Mutant	B4GAT1
4	SO	JJ063	-32.95364266666666	B4GAT1M155T/M155T	B4GAT1-Mutant	B4GAT1
4	SO	JJ064	2.566376999999998	B4GAT1M155T/M155T	B4GAT1-Mutant	B4GAT1
4	SO	JJ065	-16.836688666666664	B4GAT1M155T/M155T	B4GAT1-Mutant	B4GAT1
4	SO	JJ066	29.13820766666666	B4GAT1M155T/M155T	B4GAT1-Mutant	B4GAT1
4	SO	JJ067	-29.251165333333336	B4GAT1M155T/M155T	B4GAT1-Mutant	B4GAT1
4	SO	JJ068	-32.632318000000005	B4GAT1M155T/M155T	B4GAT1-Mutant	B4GAT1
4	SO	JJ077	33.33582533333333	B4GAT1M155T/M155T	B4GAT1-Mutant	B4GAT1
4	SO	JJ078	-35.381401333333336	B4GAT1M155T/M155T	B4GAT1-Mutant	B4GAT1
4	SO	JJ079	1.753718666666676	B4GAT1M155T/M155T	B4GAT1-Mutant	B4GAT1
4	SO	JJ080	0.11963833333333203	B4GAT1M155T/M155T	B4GAT1-Mutant	B4GAT1
4	SO	JJ089	106.84365299999997	B4GAT1M155T/M155T	B4GAT1-Mutant	B4GAT1
4	SO	JJ090	-11.667773666666667	B4GAT1M155T/M155T	B4GAT1-Mutant	B4GAT1
4	SO	JJ091	16.93178233333334	B4GAT1M155T/M155T	B4GAT1-Mutant	B4GAT1
4	SO	JJ092	27.175890666666657	B4GAT1M155T/M155T	B4GAT1-Mutant	B4GAT1
4	SO	JJ093	-34.69792033333332	WT	B4GAT1-Ctrl	B4GAT1
4	SO	JJ094	-80.37265699999999	WT	B4GAT1-Ctrl	B4GAT1
4	SO	JJ095	-60.433673999999996	WT	B4GAT1-Ctrl	B4GAT1
4	SO	JJ096	-54.467231999999996	WT	B4GAT1-Ctrl	B4GAT1
4	SO	JJ101	-47.78247366666667	WT	B4GAT1-Ctrl	B4GAT1
4	SO	JJ102	2.4301856666666786	WT	B4GAT1-Ctrl	B4GAT1
4	SO	JJ103	13.062796999999989	WT	B4GAT1-Ctrl	B4GAT1
4	SO	JJ104	-63.38322266666665	WT	B4GAT1-Ctrl	B4GAT1
4	SO	JJ111	118.57287799999999	Emx-Cre+;DGF/-	Emx-DG-cKO	Emx-DG
4	SO	JJ112	77.0942173333333	Emx-Cre+;DGF/-	Emx-DG-cKO	Emx-DG
4	SO	JJ113	86.42388566666666	Emx-Cre+;DGF/-	Emx-DG-cKO	Emx-DG
4	SO	JJ118	90.82806366666665	Emx-Cre+;DGF/-	Emx-DG-cKO	Emx-DG
4	SO	JJ119	48.0273116666667	Emx-Cre+;DGF/-	Emx-DG-cKO	Emx-DG
4	SO	JJ120	-37.57992233333334	Emx-Cre+;DGF/-	Emx-DG-cKO	Emx-DG
4	SO	JJ121	23.834329999999994	Emx-Cre+;DGF/-	Emx-DG-cKO	Emx-DG
4	SO	JJ134	7.708920333333339	Emx-Cre+;DGF/+	Emx-DG-Ctrl	Emx-DG
4	SO	JJ135	17.32988633333336	Emx-Cre+;DGF/+	Emx-DG-Ctrl	Emx-DG
4	SO	JJ136	-18.98487100000001	Emx-Cre+;DGF/+	Emx-DG-Ctrl	Emx-DG
4	SO	JJ137	-33.22029866666667	Emx-Cre+;DGF/+	Emx-DG-Ctrl	Emx-DG
4	SO	JJ150	110.89083233333336	Emx-Cre+;POMT2F/F	Emx-POMT2-cKO	Emx-POMT2
4	SO	JJ151	132.5463313333333	Emx-Cre+;POMT2F/F	Emx-POMT2-cKO	Emx-POMT2
4	SO	JJ152	101.22538666666667	Emx-Cre+;POMT2F/F	Emx-POMT2-cKO	Emx-POMT2
4	SO	JJ153	156.69665833333332	Emx-Cre+;POMT2F/F	Emx-POMT2-cKO	Emx-POMT2
4	SO	JJ154	-47.897671	Emx-Cre+;POMT2F/+	Emx-POMT2-Ctrl	Emx-POMT2
4	SO	JJ155	-92.38243633333333	Emx-Cre+;POMT2F/+	Emx-POMT2-Ctrl	Emx-POMT2
4	SO	JJ156	-24.456933333333364	Emx-Cre+;POMT2F/+	Emx-POMT2-Ctrl	Emx-POMT2
4	SO	JJ157	-52.029220666666674	Emx-Cre+;POMT2F/+	Emx-POMT2-Ctrl	Emx-POMT2
4	SO	JJ227	35.15376466666666	Emx-Cre+;POMT2F/F	Emx-POMT2-cKO	Emx-POMT2
4	SO	JJ228	19.827486666666648	Emx-Cre+;POMT2F/F	Emx-POMT2-cKO	Emx-POMT2
4	SO	JJ229	13.902110333333345	Emx-Cre+;POMT2F/F	Emx-POMT2-cKO	Emx-POMT2
4	SO	JJ230	65.989268	Emx-Cre+;POMT2F/F	Emx-POMT2-cKO	Emx-POMT2
4	SO	JJ235	-11.051486666666685	Emx-Cre+;POMT2F/+	Emx-POMT2-Ctrl	Emx-POMT2
4	SO	JJ236	-28.496312333333332	Emx-Cre+;POMT2F/+	Emx-POMT2-Ctrl	Emx-POMT2
4	SO	JJ237	-22.684570000000008	Emx-Cre+;POMT2F/+	Emx-POMT2-Ctrl	Emx-POMT2
4	SO	JJ238	-3.565396333333325	Emx-Cre+;POMT2F/+	Emx-POMT2-Ctrl	Emx-POMT2
4	SO	JJ243	-37.02821500000001	Emx-Cre+;POMT2F/+	Emx-POMT2-Ctrl	Emx-POMT2
4	SO	JJ244	13.024099666666663	Emx-Cre+;POMT2F/+	Emx-POMT2-Ctrl	Emx-POMT2
4	SO	JJ245	-20.235017999999997	Emx-Cre+;POMT2F/+	Emx-POMT2-Ctrl	Emx-POMT2
4	SO	JJ246	-19.767329	Emx-Cre+;POMT2F/+	Emx-POMT2-Ctrl	Emx-POMT2
4	SO	JJ247	-35.22228233333332	FKRPMut	FKRP-Mutant	FKRP
4	SO	JJ248	9.152098000000004	FKRPMut	FKRP-Mutant	FKRP
4	SO	JJ249	-14.495035333333314	FKRPMut	FKRP-Mutant	FKRP
4	SO	JJ250	-10.334596999999993	FKRPMut	FKRP-Mutant	FKRP
4	SO	JJ251	-15.859123000000002	WT	FKRP-Ctrl	FKRP
4	SO	JJ252	5.775560000000003	WT	FKRP-Ctrl	FKRP
4	SO	JJ253	-28.953148666666664	WT	FKRP-Ctrl	FKRP
4	SO	JJ254	-15.829060000000007	WT	FKRP-Ctrl	FKRP
4	SO	JJ255	-73.78113333333333	WT	FKRP-Ctrl	FKRP
4	SO	JJ256	-9.737483999999995	WT	FKRP-Ctrl	FKRP
4	SO	JJ257	-50.26608333333334	WT	FKRP-Ctrl	FKRP
4	SO	JJ258	-26.590038666666675	WT	FKRP-Ctrl	FKRP
4	SO	JJ259	-14.82189333333334	FKRPMut	FKRP-Mutant	FKRP
4	SO	JJ260	-18.82243299999999	FKRPMut	FKRP-Mutant	FKRP
4	SO	JJ261	-31.058400999999993	FKRPMut	FKRP-Mutant	FKRP
4	SO	JJ262	-11.86323866666667	FKRPMut	FKRP-Mutant	FKRP
4	SO	JJ263	-51.7168826666667	WT	FKRP-Ctrl	FKRP
4	SO	JJ264	-27.301258333333333	WT	FKRP-Ctrl	FKRP
4	SO	JJ265	3.6465179999999955	WT	FKRP-Ctrl	FKRP
4	SO	JJ266	-57.75271666666665	WT	FKRP-Ctrl	FKRP
4	SO	JJ299	52.031040666666705	DGdelta/-	ICD-Mutant	ICD
4	SO	JJ300	-9.75251666666668	DGdelta/-	ICD-Mutant	ICD
4	SO	JJ301	-16.507904666666644	DGdelta/-	ICD-Mutant	ICD
4	SO	JJ302	-19.84222266666664	DGdelta/-	ICD-Mutant	ICD
4	SO	JJ307	-2.552545666666655	WT	ICD-Ctrl	ICD
4	SO	JJ308	-20.41516899999999	WT	ICD-Ctrl	ICD
4	SO	JJ309	-31.481449666666663	WT	ICD-Ctrl	ICD
4	SO	JJ310	-5.209673333333323	WT	ICD-Ctrl	ICD
4	SO	JJ331	-61.97279800000001	DGdelta/-	ICD-Mutant	ICD
4	SO	JJ332	4.642339666666658	DGdelta/-	ICD-Mutant	ICD
4	SO	JJ333	-70.198054	DGdelta/-	ICD-Mutant	ICD
4	SO	JJ334	-44.77857533333333	DGdelta/-	ICD-Mutant	ICD
4	SO	JJ339	-33.66454366666667	DGdelta/-	ICD-Mutant	ICD
4	SO	JJ340	7.916959999999999	DGdelta/-	ICD-Mutant	ICD
4	SO	JJ341	-33.331447666666655	DGdelta/-	ICD-Mutant	ICD
4	SO	JJ342	-11.847843333333325	DGdelta/-	ICD-Mutant	ICD
4	SO	JJ347	19.980983	WT	ICD-Ctrl	ICD
4	SO	JJ348	-8.157090666666685	WT	ICD-Ctrl	ICD
4	SO	JJ349	-22.873686666666675	WT	ICD-Ctrl	ICD
4	SO	JJ350	-0.6192333333333219	WT	ICD-Ctrl	ICD
4	SO	JJ355	-6.408400666666665	WT	ICD-Ctrl	ICD
4	SO	JJ356	-45.687286666666665	WT	ICD-Ctrl	ICD
4	SO	JJ357	-22.618773333333326	WT	ICD-Ctrl	ICD
4	SO	JJ358	-29.672490666666686	WT	ICD-Ctrl	ICD
4	SO	JJ362	-28.31729033333333	FKRPMut	FKRP-Mutant	FKRP
4	SO	JJ363	-8.476692333333347	FKRPMut	FKRP-Mutant	FKRP
4	SO	JJ364	24.636074000000036	FKRPMut	FKRP-Mutant	FKRP
4	SO	JJ365	8.652155333333326	FKRPMut	FKRP-Mutant	FKRP
4	SO	JJ369	-52.591963666666686	WT	FKRP-Ctrl	FKRP
4	SO	JJ370	-28.35564733333331	WT	FKRP-Ctrl	FKRP
4	SO	JJ371	-12.478586000000007	WT	FKRP-Ctrl	FKRP
4	SO	JJ372	-27.7671083333333	WT	FKRP-Ctrl	FKRP
4	SO	JJ373	69.77315266666665	Emx-Cre+;DGF/-	Emx-DG-cKO	Emx-DG
4	SO	JJ374	34.001890333333336	Emx-Cre+;DGF/-	Emx-DG-cKO	Emx-DG
4	SO	JJ375	109.87374533333332	Emx-Cre+;DGF/-	Emx-DG-cKO	Emx-DG
4	SO	JJ376	-9.826675666666668	Emx-Cre+;DGF/-	Emx-DG-cKO	Emx-DG
4	SO	JJ377	44.40154033333332	Emx-Cre+;DGF/-	Emx-DG-cKO	Emx-DG
4	SO	JJ378	26.387013999999983	Emx-Cre+;DGF/-	Emx-DG-cKO	Emx-DG
4	SO	JJ379	42.91220666666669	Emx-Cre+;DGF/-	Emx-DG-cKO	Emx-DG
4	SO	JJ380	18.314691333333332	Emx-Cre+;DGF/-	Emx-DG-cKO	Emx-DG
4	SO	JJ381	-26.27123500000002	Emx-Cre+;DGF/+	Emx-DG-Ctrl	Emx-DG
4	SO	JJ382	-41.400733333333335	Emx-Cre+;DGF/+	Emx-DG-Ctrl	Emx-DG
4	SO	JJ384	-21.021622999999977	Emx-Cre+;DGF/+	Emx-DG-Ctrl	Emx-DG
4	SO	JJ385	-44.72834400000001	Emx-Cre+;DGF/-	Emx-DG-cKO	Emx-DG
4	SO	JJ386	-29.444074500000006	Emx-Cre+;DGF/-	Emx-DG-cKO	Emx-DG
4	SO	JJ387	27.053819000000004	Emx-Cre+;DGF/-	Emx-DG-cKO	Emx-DG
4	SO	JJ388	2.976270166666661	Emx-Cre+;DGF/+	Emx-DG-Ctrl	Emx-DG
4	SO	JJ388	2.976270166666661	Emx-Cre+;DGF/+	Emx-DG-Ctrl	Emx-DG
4	SO	JJ389	65.31081333333333	Emx-Cre+;DGF/+	Emx-DG-Ctrl	Emx-DG
4	SO	JJ390	14.89282966666668	Emx-Cre+;DGF/+	Emx-DG-Ctrl	Emx-DG
4	SO	JJ391	19.788712666666687	Emx-Cre+;DGF/+	Emx-DG-Ctrl	Emx-DG
4	SO	JJ392	-11.436898000000005	Emx-Cre+;DGF/+	Emx-DG-Ctrl	Emx-DG
5	SO	JJ001	-50.63559566666667	Emx-Cre+;POMT2F/+	Emx-POMT2-Ctrl	Emx-POMT2
5	SO	JJ002	45.48805433333334	Emx-Cre+;POMT2F/F	Emx-POMT2-cKO	Emx-POMT2
5	SO	JJ003	-28.918035999999997	Emx-Cre+;POMT2F/+	Emx-POMT2-Ctrl	Emx-POMT2
5	SO	JJ004	-25.936684666666665	Emx-Cre+;POMT2F/+	Emx-POMT2-Ctrl	Emx-POMT2
5	SO	JJ005	-43.77861533333333	Emx-Cre+;POMT2F/+	Emx-POMT2-Ctrl	Emx-POMT2
5	SO	JJ006	126.14273766666669	Emx-Cre+;POMT2F/F	Emx-POMT2-cKO	Emx-POMT2
5	SO	JJ007	26.489095333333342	Emx-Cre+;POMT2F/F	Emx-POMT2-cKO	Emx-POMT2
5	SO	JJ008	-21.069947333333328	Emx-Cre+;POMT2F/F	Emx-POMT2-cKO	Emx-POMT2
5	SO	JJ029	-54.04127633333334	WT	B4GAT1-Ctrl	B4GAT1
5	SO	JJ030	-72.90034533333332	WT	B4GAT1-Ctrl	B4GAT1
5	SO	JJ031	-73.56641333333333	WT	B4GAT1-Ctrl	B4GAT1
5	SO	JJ032	-76.78908733333334	WT	B4GAT1-Ctrl	B4GAT1
5	SO	JJ033	-28.114707666666664	B4GAT1M155T/M155T	B4GAT1-Mutant	B4GAT1
5	SO	JJ034	-4.210977999999993	B4GAT1M155T/M155T	B4GAT1-Mutant	B4GAT1
5	SO	JJ035	71.87153466666665	B4GAT1M155T/M155T	B4GAT1-Mutant	B4GAT1
5	SO	JJ036	46.43684333333332	B4GAT1M155T/M155T	B4GAT1-Mutant	B4GAT1
5	SO	JJ061	-2.465228666666661	B4GAT1M155T/M155T	B4GAT1-Mutant	B4GAT1
5	SO	JJ062	-10.123679666666655	B4GAT1M155T/M155T	B4GAT1-Mutant	B4GAT1
5	SO	JJ063	-27.119359333333325	B4GAT1M155T/M155T	B4GAT1-Mutant	B4GAT1
5	SO	JJ064	3.1670936666666685	B4GAT1M155T/M155T	B4GAT1-Mutant	B4GAT1
5	SO	JJ065	-0.006905333333340499	B4GAT1M155T/M155T	B4GAT1-Mutant	B4GAT1
5	SO	JJ066	-15.186009000000004	B4GAT1M155T/M155T	B4GAT1-Mutant	B4GAT1
5	SO	JJ067	-31.351832000000012	B4GAT1M155T/M155T	B4GAT1-Mutant	B4GAT1
5	SO	JJ068	-16.200001333333336	B4GAT1M155T/M155T	B4GAT1-Mutant	B4GAT1
5	SO	JJ077	16.044475333333327	B4GAT1M155T/M155T	B4GAT1-Mutant	B4GAT1
5	SO	JJ078	-21.90240133333334	B4GAT1M155T/M155T	B4GAT1-Mutant	B4GAT1
5	SO	JJ079	7.27900200000001	B4GAT1M155T/M155T	B4GAT1-Mutant	B4GAT1
5	SO	JJ080	-3.923861666666672	B4GAT1M155T/M155T	B4GAT1-Mutant	B4GAT1
5	SO	JJ089	28.232102999999995	B4GAT1M155T/M155T	B4GAT1-Mutant	B4GAT1
5	SO	JJ090	1.3261929999999988	B4GAT1M155T/M155T	B4GAT1-Mutant	B4GAT1
5	SO	JJ091	11.21769899999999	B4GAT1M155T/M155T	B4GAT1-Mutant	B4GAT1
5	SO	JJ092	59.51064066666667	B4GAT1M155T/M155T	B4GAT1-Mutant	B4GAT1
5	SO	JJ093	-7.9193369999999845	WT	B4GAT1-Ctrl	B4GAT1
5	SO	JJ094	-70.22869033333335	WT	B4GAT1-Ctrl	B4GAT1
5	SO	JJ095	-66.61529066666664	WT	B4GAT1-Ctrl	B4GAT1
5	SO	JJ096	-42.307665333333325	WT	B4GAT1-Ctrl	B4GAT1
5	SO	JJ101	-11.808373666666645	WT	B4GAT1-Ctrl	B4GAT1
5	SO	JJ102	45.754135666666684	WT	B4GAT1-Ctrl	B4GAT1
5	SO	JJ103	14.87923033333334	WT	B4GAT1-Ctrl	B4GAT1
5	SO	JJ104	-54.566905999999996	WT	B4GAT1-Ctrl	B4GAT1
5	SO	JJ111	101.83887800000001	Emx-Cre+;DGF/-	Emx-DG-cKO	Emx-DG
5	SO	JJ112	114.38968399999997	Emx-Cre+;DGF/-	Emx-DG-cKO	Emx-DG
5	SO	JJ113	67.07173566666667	Emx-Cre+;DGF/-	Emx-DG-cKO	Emx-DG
5	SO	JJ118	121.042847	Emx-Cre+;DGF/-	Emx-DG-cKO	Emx-DG
5	SO	JJ119	50.257645000000004	Emx-Cre+;DGF/-	Emx-DG-cKO	Emx-DG
5	SO	JJ120	-28.090572333333352	Emx-Cre+;DGF/-	Emx-DG-cKO	Emx-DG
5	SO	JJ121	20.532296666666678	Emx-Cre+;DGF/-	Emx-DG-cKO	Emx-DG
5	SO	JJ134	-9.754996333333319	Emx-Cre+;DGF/+	Emx-DG-Ctrl	Emx-DG
5	SO	JJ135	32.93975300000002	Emx-Cre+;DGF/+	Emx-DG-Ctrl	Emx-DG
5	SO	JJ136	-16.517287666666665	Emx-Cre+;DGF/+	Emx-DG-Ctrl	Emx-DG
5	SO	JJ137	-10.68689866666665	Emx-Cre+;DGF/+	Emx-DG-Ctrl	Emx-DG
5	SO	JJ150	106.83278233333334	Emx-Cre+;POMT2F/F	Emx-POMT2-cKO	Emx-POMT2
5	SO	JJ151	119.92256466666667	Emx-Cre+;POMT2F/F	Emx-POMT2-cKO	Emx-POMT2
5	SO	JJ152	135.72525333333334	Emx-Cre+;POMT2F/F	Emx-POMT2-cKO	Emx-POMT2
5	SO	JJ153	125.31710833333334	Emx-Cre+;POMT2F/F	Emx-POMT2-cKO	Emx-POMT2
5	SO	JJ154	-53.067854333333344	Emx-Cre+;POMT2F/+	Emx-POMT2-Ctrl	Emx-POMT2
5	SO	JJ155	-65.62940299999998	Emx-Cre+;POMT2F/+	Emx-POMT2-Ctrl	Emx-POMT2
5	SO	JJ156	-19.67743333333334	Emx-Cre+;POMT2F/+	Emx-POMT2-Ctrl	Emx-POMT2
5	SO	JJ157	-33.40083733333333	Emx-Cre+;POMT2F/+	Emx-POMT2-Ctrl	Emx-POMT2
5	SO	JJ227	43.574848	Emx-Cre+;POMT2F/F	Emx-POMT2-cKO	Emx-POMT2
5	SO	JJ228	4.5847866666666635	Emx-Cre+;POMT2F/F	Emx-POMT2-cKO	Emx-POMT2
5	SO	JJ229	-15.662289666666672	Emx-Cre+;POMT2F/F	Emx-POMT2-cKO	Emx-POMT2
5	SO	JJ230	79.66548466666667	Emx-Cre+;POMT2F/F	Emx-POMT2-cKO	Emx-POMT2
5	SO	JJ235	-13.882603333333341	Emx-Cre+;POMT2F/+	Emx-POMT2-Ctrl	Emx-POMT2
5	SO	JJ236	-30.368879000000003	Emx-Cre+;POMT2F/+	Emx-POMT2-Ctrl	Emx-POMT2
5	SO	JJ237	-24.699036666666682	Emx-Cre+;POMT2F/+	Emx-POMT2-Ctrl	Emx-POMT2
5	SO	JJ238	2.6209870000000137	Emx-Cre+;POMT2F/+	Emx-POMT2-Ctrl	Emx-POMT2
5	SO	JJ243	-9.191798333333358	Emx-Cre+;POMT2F/+	Emx-POMT2-Ctrl	Emx-POMT2
5	SO	JJ244	-22.621383666666674	Emx-Cre+;POMT2F/+	Emx-POMT2-Ctrl	Emx-POMT2
5	SO	JJ245	-16.230551333333324	Emx-Cre+;POMT2F/+	Emx-POMT2-Ctrl	Emx-POMT2
5	SO	JJ246	-23.480379	Emx-Cre+;POMT2F/+	Emx-POMT2-Ctrl	Emx-POMT2
5	SO	JJ247	-34.314682333333316	FKRPMut	FKRP-Mutant	FKRP
5	SO	JJ248	11.189264666666674	FKRPMut	FKRP-Mutant	FKRP
5	SO	JJ249	-10.518951999999993	FKRPMut	FKRP-Mutant	FKRP
5	SO	JJ250	-2.459596999999983	FKRPMut	FKRP-Mutant	FKRP
5	SO	JJ251	1.7895103333333207	WT	FKRP-Ctrl	FKRP
5	SO	JJ252	28.76924333333332	WT	FKRP-Ctrl	FKRP
5	SO	JJ253	-19.470348666666666	WT	FKRP-Ctrl	FKRP
5	SO	JJ254	19.221523333333323	WT	FKRP-Ctrl	FKRP
5	SO	JJ255	-66.10951666666665	WT	FKRP-Ctrl	FKRP
5	SO	JJ256	-6.8788006666666774	WT	FKRP-Ctrl	FKRP
5	SO	JJ257	-48.75633333333335	WT	FKRP-Ctrl	FKRP
5	SO	JJ258	-31.600672000000014	WT	FKRP-Ctrl	FKRP
5	SO	JJ259	-3.779443333333328	FKRPMut	FKRP-Mutant	FKRP
5	SO	JJ260	-12.642883000000003	FKRPMut	FKRP-Mutant	FKRP
5	SO	JJ261	-22.63790099999998	FKRPMut	FKRP-Mutant	FKRP
5	SO	JJ262	-0.04963866666668082	FKRPMut	FKRP-Mutant	FKRP
5	SO	JJ263	-55.01104933333337	WT	FKRP-Ctrl	FKRP
5	SO	JJ264	-19.914424999999984	WT	FKRP-Ctrl	FKRP
5	SO	JJ265	0.4820180000000012	WT	FKRP-Ctrl	FKRP
5	SO	JJ266	-76.75265	WT	FKRP-Ctrl	FKRP
5	SO	JJ299	45.359323999999994	DGdelta/-	ICD-Mutant	ICD
5	SO	JJ300	-4.880333333333378	DGdelta/-	ICD-Mutant	ICD
5	SO	JJ301	-2.5875213333333327	DGdelta/-	ICD-Mutant	ICD
5	SO	JJ302	-14.197105999999982	DGdelta/-	ICD-Mutant	ICD
5	SO	JJ307	-6.01962899999999	WT	ICD-Ctrl	ICD
5	SO	JJ308	-8.65263566666666	WT	ICD-Ctrl	ICD
5	SO	JJ309	-39.564316333333316	WT	ICD-Ctrl	ICD
5	SO	JJ310	-0.7837399999999851	WT	ICD-Ctrl	ICD
5	SO	JJ331	-31.355014666666687	DGdelta/-	ICD-Mutant	ICD
5	SO	JJ332	-6.416810333333349	DGdelta/-	ICD-Mutant	ICD
5	SO	JJ333	-50.71505399999999	DGdelta/-	ICD-Mutant	ICD
5	SO	JJ334	-45.44185866666666	DGdelta/-	ICD-Mutant	ICD
5	SO	JJ339	-17.21456033333332	DGdelta/-	ICD-Mutant	ICD
5	SO	JJ340	15.098660000000015	DGdelta/-	ICD-Mutant	ICD
5	SO	JJ341	-15.531197666666648	DGdelta/-	ICD-Mutant	ICD
5	SO	JJ342	3.9864233333333345	DGdelta/-	ICD-Mutant	ICD
5	SO	JJ347	14.613782999999993	WT	ICD-Ctrl	ICD
5	SO	JJ348	2.7793759999999756	WT	ICD-Ctrl	ICD
5	SO	JJ349	-25.43183666666668	WT	ICD-Ctrl	ICD
5	SO	JJ350	27.506333333333334	WT	ICD-Ctrl	ICD
5	SO	JJ355	-4.382950666666669	WT	ICD-Ctrl	ICD
5	SO	JJ356	-39.47248666666666	WT	ICD-Ctrl	ICD
5	SO	JJ357	-16.481406666666658	WT	ICD-Ctrl	ICD
5	SO	JJ358	-26.842074000000007	WT	ICD-Ctrl	ICD
5	SO	JJ362	-27.822157000000004	FKRPMut	FKRP-Mutant	FKRP
5	SO	JJ363	-6.654925666666675	FKRPMut	FKRP-Mutant	FKRP
5	SO	JJ364	12.824424000000041	FKRPMut	FKRP-Mutant	FKRP
5	SO	JJ365	17.565505333333345	FKRPMut	FKRP-Mutant	FKRP
5	SO	JJ369	-59.609947	WT	FKRP-Ctrl	FKRP
5	SO	JJ370	-15.845547333333306	WT	FKRP-Ctrl	FKRP
5	SO	JJ371	-9.525152666666676	WT	FKRP-Ctrl	FKRP
5	SO	JJ372	-36.61300833333331	WT	FKRP-Ctrl	FKRP
5	SO	JJ373	77.55208599999999	Emx-Cre+;DGF/-	Emx-DG-cKO	Emx-DG
5	SO	JJ374	21.363473666666664	Emx-Cre+;DGF/-	Emx-DG-cKO	Emx-DG
5	SO	JJ375	117.83049533333333	Emx-Cre+;DGF/-	Emx-DG-cKO	Emx-DG
5	SO	JJ376	-22.983875666666666	Emx-Cre+;DGF/-	Emx-DG-cKO	Emx-DG
5	SO	JJ377	38.872890333333316	Emx-Cre+;DGF/-	Emx-DG-cKO	Emx-DG
5	SO	JJ378	14.996530666666652	Emx-Cre+;DGF/-	Emx-DG-cKO	Emx-DG
5	SO	JJ379	38.466240000000006	Emx-Cre+;DGF/-	Emx-DG-cKO	Emx-DG
5	SO	JJ380	21.042658	Emx-Cre+;DGF/-	Emx-DG-cKO	Emx-DG
5	SO	JJ381	-30.762735000000003	Emx-Cre+;DGF/+	Emx-DG-Ctrl	Emx-DG
5	SO	JJ382	-35.142999999999994	Emx-Cre+;DGF/+	Emx-DG-Ctrl	Emx-DG
5	SO	JJ384	-20.805139666666673	Emx-Cre+;DGF/+	Emx-DG-Ctrl	Emx-DG
5	SO	JJ385	-46.01824400000001	Emx-Cre+;DGF/-	Emx-DG-cKO	Emx-DG
5	SO	JJ386	-26.226599500000006	Emx-Cre+;DGF/-	Emx-DG-cKO	Emx-DG
5	SO	JJ387	32.151844	Emx-Cre+;DGF/-	Emx-DG-cKO	Emx-DG
5	SO	JJ388	3.860461833333337	Emx-Cre+;DGF/+	Emx-DG-Ctrl	Emx-DG
5	SO	JJ388	3.860461833333337	Emx-Cre+;DGF/+	Emx-DG-Ctrl	Emx-DG
5	SO	JJ389	70.49094666666667	Emx-Cre+;DGF/+	Emx-DG-Ctrl	Emx-DG
5	SO	JJ390	15.808379666666667	Emx-Cre+;DGF/+	Emx-DG-Ctrl	Emx-DG
5	SO	JJ391	24.768762666666664	Emx-Cre+;DGF/+	Emx-DG-Ctrl	Emx-DG
5	SO	JJ392	-2.5927646666666626	Emx-Cre+;DGF/+	Emx-DG-Ctrl	Emx-DG
6	SO	JJ001	-39.47184566666666	Emx-Cre+;POMT2F/+	Emx-POMT2-Ctrl	Emx-POMT2
6	SO	JJ002	30.51215433333333	Emx-Cre+;POMT2F/F	Emx-POMT2-cKO	Emx-POMT2
6	SO	JJ003	-25.87368599999999	Emx-Cre+;POMT2F/+	Emx-POMT2-Ctrl	Emx-POMT2
6	SO	JJ004	-26.249518000000005	Emx-Cre+;POMT2F/+	Emx-POMT2-Ctrl	Emx-POMT2
6	SO	JJ005	-37.72881533333332	Emx-Cre+;POMT2F/+	Emx-POMT2-Ctrl	Emx-POMT2
6	SO	JJ006	93.46865433333333	Emx-Cre+;POMT2F/F	Emx-POMT2-cKO	Emx-POMT2
6	SO	JJ007	5.70359533333333	Emx-Cre+;POMT2F/F	Emx-POMT2-cKO	Emx-POMT2
6	SO	JJ008	17.193852666666658	Emx-Cre+;POMT2F/F	Emx-POMT2-cKO	Emx-POMT2
6	SO	JJ029	-52.71587633333334	WT	B4GAT1-Ctrl	B4GAT1
6	SO	JJ030	-56.64764533333332	WT	B4GAT1-Ctrl	B4GAT1
6	SO	JJ031	-64.45794666666667	WT	B4GAT1-Ctrl	B4GAT1
6	SO	JJ032	-67.38398733333337	WT	B4GAT1-Ctrl	B4GAT1
6	SO	JJ033	-23.458307666666666	B4GAT1M155T/M155T	B4GAT1-Mutant	B4GAT1
6	SO	JJ034	13.71995533333334	B4GAT1M155T/M155T	B4GAT1-Mutant	B4GAT1
6	SO	JJ035	36.347951333333334	B4GAT1M155T/M155T	B4GAT1-Mutant	B4GAT1
6	SO	JJ036	43.524676666666664	B4GAT1M155T/M155T	B4GAT1-Mutant	B4GAT1
6	SO	JJ061	-5.015178666666675	B4GAT1M155T/M155T	B4GAT1-Mutant	B4GAT1
6	SO	JJ062	-26.187879666666664	B4GAT1M155T/M155T	B4GAT1-Mutant	B4GAT1
6	SO	JJ063	-22.511142666666643	B4GAT1M155T/M155T	B4GAT1-Mutant	B4GAT1
6	SO	JJ064	-2.8450396666666697	B4GAT1M155T/M155T	B4GAT1-Mutant	B4GAT1
6	SO	JJ065	-7.480855333333333	B4GAT1M155T/M155T	B4GAT1-Mutant	B4GAT1
6	SO	JJ066	-15.891959000000005	B4GAT1M155T/M155T	B4GAT1-Mutant	B4GAT1
6	SO	JJ067	-22.056415333333337	B4GAT1M155T/M155T	B4GAT1-Mutant	B4GAT1
6	SO	JJ068	-10.039068000000015	B4GAT1M155T/M155T	B4GAT1-Mutant	B4GAT1
6	SO	JJ077	17.618741999999987	B4GAT1M155T/M155T	B4GAT1-Mutant	B4GAT1
6	SO	JJ078	-14.064318000000005	B4GAT1M155T/M155T	B4GAT1-Mutant	B4GAT1
6	SO	JJ079	-1.1474479999999876	B4GAT1M155T/M155T	B4GAT1-Mutant	B4GAT1
6	SO	JJ080	-13.952445000000003	B4GAT1M155T/M155T	B4GAT1-Mutant	B4GAT1
6	SO	JJ089	67.06448633333333	B4GAT1M155T/M155T	B4GAT1-Mutant	B4GAT1
6	SO	JJ090	7.180142999999987	B4GAT1M155T/M155T	B4GAT1-Mutant	B4GAT1
6	SO	JJ091	-3.452717666666672	B4GAT1M155T/M155T	B4GAT1-Mutant	B4GAT1
6	SO	JJ092	-1.8366093333333424	B4GAT1M155T/M155T	B4GAT1-Mutant	B4GAT1
6	SO	JJ093	-2.9815036666666592	WT	B4GAT1-Ctrl	B4GAT1
6	SO	JJ094	-49.769156999999986	WT	B4GAT1-Ctrl	B4GAT1
6	SO	JJ095	-66.50759066666666	WT	B4GAT1-Ctrl	B4GAT1
6	SO	JJ096	-17.457898666666665	WT	B4GAT1-Ctrl	B4GAT1
6	SO	JJ101	-19.45297366666667	WT	B4GAT1-Ctrl	B4GAT1
6	SO	JJ102	-3.3898143333333146	WT	B4GAT1-Ctrl	B4GAT1
6	SO	JJ103	64.59946366666667	WT	B4GAT1-Ctrl	B4GAT1
6	SO	JJ104	-48.204306	WT	B4GAT1-Ctrl	B4GAT1
6	SO	JJ111	125.16246133333334	Emx-Cre+;DGF/-	Emx-DG-cKO	Emx-DG
6	SO	JJ112	119.38971733333331	Emx-Cre+;DGF/-	Emx-DG-cKO	Emx-DG
6	SO	JJ113	59.158969000000006	Emx-Cre+;DGF/-	Emx-DG-cKO	Emx-DG
6	SO	JJ118	126.73973033333333	Emx-Cre+;DGF/-	Emx-DG-cKO	Emx-DG
6	SO	JJ119	46.06147833333333	Emx-Cre+;DGF/-	Emx-DG-cKO	Emx-DG
6	SO	JJ120	0.8495776666666472	Emx-Cre+;DGF/-	Emx-DG-cKO	Emx-DG
6	SO	JJ121	9.990996666666652	Emx-Cre+;DGF/-	Emx-DG-cKO	Emx-DG
6	SO	JJ134	-35.80299633333332	Emx-Cre+;DGF/+	Emx-DG-Ctrl	Emx-DG
6	SO	JJ135	25.78755300000002	Emx-Cre+;DGF/+	Emx-DG-Ctrl	Emx-DG
6	SO	JJ136	-13.261871000000005	Emx-Cre+;DGF/+	Emx-DG-Ctrl	Emx-DG
6	SO	JJ137	-12.435881999999983	Emx-Cre+;DGF/+	Emx-DG-Ctrl	Emx-DG
6	SO	JJ150	96.087499	Emx-Cre+;POMT2F/F	Emx-POMT2-cKO	Emx-POMT2
6	SO	JJ151	108.58933133333333	Emx-Cre+;POMT2F/F	Emx-POMT2-cKO	Emx-POMT2
6	SO	JJ152	162.08738666666667	Emx-Cre+;POMT2F/F	Emx-POMT2-cKO	Emx-POMT2
6	SO	JJ153	125.34449166666667	Emx-Cre+;POMT2F/F	Emx-POMT2-cKO	Emx-POMT2
6	SO	JJ154	-21.46483766666667	Emx-Cre+;POMT2F/+	Emx-POMT2-Ctrl	Emx-POMT2
6	SO	JJ155	-75.25385299999998	Emx-Cre+;POMT2F/+	Emx-POMT2-Ctrl	Emx-POMT2
6	SO	JJ156	-46.94610000000004	Emx-Cre+;POMT2F/+	Emx-POMT2-Ctrl	Emx-POMT2
6	SO	JJ157	-38.86513733333334	Emx-Cre+;POMT2F/+	Emx-POMT2-Ctrl	Emx-POMT2
6	SO	JJ227	23.33051466666666	Emx-Cre+;POMT2F/F	Emx-POMT2-cKO	Emx-POMT2
6	SO	JJ228	16.16406999999998	Emx-Cre+;POMT2F/F	Emx-POMT2-cKO	Emx-POMT2
6	SO	JJ229	-10.699473000000003	Emx-Cre+;POMT2F/F	Emx-POMT2-cKO	Emx-POMT2
6	SO	JJ230	49.03510133333333	Emx-Cre+;POMT2F/F	Emx-POMT2-cKO	Emx-POMT2
6	SO	JJ235	-4.783570000000016	Emx-Cre+;POMT2F/+	Emx-POMT2-Ctrl	Emx-POMT2
6	SO	JJ236	-25.713979000000005	Emx-Cre+;POMT2F/+	Emx-POMT2-Ctrl	Emx-POMT2
6	SO	JJ237	-20.978903333333335	Emx-Cre+;POMT2F/+	Emx-POMT2-Ctrl	Emx-POMT2
6	SO	JJ238	12.026853666666682	Emx-Cre+;POMT2F/+	Emx-POMT2-Ctrl	Emx-POMT2
6	SO	JJ243	4.699534999999988	Emx-Cre+;POMT2F/+	Emx-POMT2-Ctrl	Emx-POMT2
6	SO	JJ244	9.724349666666663	Emx-Cre+;POMT2F/+	Emx-POMT2-Ctrl	Emx-POMT2
6	SO	JJ245	-14.110351333333321	Emx-Cre+;POMT2F/+	Emx-POMT2-Ctrl	Emx-POMT2
6	SO	JJ246	-17.587495666666666	Emx-Cre+;POMT2F/+	Emx-POMT2-Ctrl	Emx-POMT2
6	SO	JJ247	48.914884333333326	FKRPMut	FKRP-Mutant	FKRP
6	SO	JJ248	21.468764666666658	FKRPMut	FKRP-Mutant	FKRP
6	SO	JJ249	-12.819368666666653	FKRPMut	FKRP-Mutant	FKRP
6	SO	JJ250	-37.17776366666667	FKRPMut	FKRP-Mutant	FKRP
6	SO	JJ251	25.516377000000006	WT	FKRP-Ctrl	FKRP
6	SO	JJ252	-4.018273333333336	WT	FKRP-Ctrl	FKRP
6	SO	JJ253	-13.05523199999998	WT	FKRP-Ctrl	FKRP
6	SO	JJ254	30.23469	WT	FKRP-Ctrl	FKRP
6	SO	JJ255	-53.613716666666654	WT	FKRP-Ctrl	FKRP
6	SO	JJ256	41.69001599999999	WT	FKRP-Ctrl	FKRP
6	SO	JJ257	-56.18916666666669	WT	FKRP-Ctrl	FKRP
6	SO	JJ258	-26.41195533333335	WT	FKRP-Ctrl	FKRP
6	SO	JJ259	11.981606666666684	FKRPMut	FKRP-Mutant	FKRP
6	SO	JJ260	-7.379599666666668	FKRPMut	FKRP-Mutant	FKRP
6	SO	JJ261	-5.999317666666656	FKRPMut	FKRP-Mutant	FKRP
6	SO	JJ262	14.578928	FKRPMut	FKRP-Mutant	FKRP
6	SO	JJ263	-46.49213266666669	WT	FKRP-Ctrl	FKRP
6	SO	JJ264	-34.42950833333333	WT	FKRP-Ctrl	FKRP
6	SO	JJ265	15.520851333333326	WT	FKRP-Ctrl	FKRP
6	SO	JJ266	-65.00571666666667	WT	FKRP-Ctrl	FKRP
6	SO	JJ299	42.405790666666654	DGdelta/-	ICD-Mutant	ICD
6	SO	JJ300	4.1562333333333	DGdelta/-	ICD-Mutant	ICD
6	SO	JJ301	27.765011999999974	DGdelta/-	ICD-Mutant	ICD
6	SO	JJ302	-13.009556000000012	DGdelta/-	ICD-Mutant	ICD
6	SO	JJ307	-7.989128999999991	WT	ICD-Ctrl	ICD
6	SO	JJ308	-3.2036689999999908	WT	ICD-Ctrl	ICD
6	SO	JJ309	-43.197533	WT	ICD-Ctrl	ICD
6	SO	JJ310	8.141326666666677	WT	ICD-Ctrl	ICD
6	SO	JJ331	-10.507798	DGdelta/-	ICD-Mutant	ICD
6	SO	JJ332	29.02025633333331	DGdelta/-	ICD-Mutant	ICD
6	SO	JJ333	-21.911387333333323	DGdelta/-	ICD-Mutant	ICD
6	SO	JJ334	-45.14640866666665	DGdelta/-	ICD-Mutant	ICD
6	SO	JJ339	-2.026043666666643	DGdelta/-	ICD-Mutant	ICD
6	SO	JJ340	13.078959999999995	DGdelta/-	ICD-Mutant	ICD
6	SO	JJ341	-18.17094766666664	DGdelta/-	ICD-Mutant	ICD
6	SO	JJ342	17.52623999999999	DGdelta/-	ICD-Mutant	ICD
6	SO	JJ347	-5.823267000000006	WT	ICD-Ctrl	ICD
6	SO	JJ348	12.276742666666658	WT	ICD-Ctrl	ICD
6	SO	JJ349	-23.054436666666675	WT	ICD-Ctrl	ICD
6	SO	JJ350	-2.5958166666666784	WT	ICD-Ctrl	ICD
6	SO	JJ355	8.65118266666667	WT	ICD-Ctrl	ICD
6	SO	JJ356	-26.302369999999986	WT	ICD-Ctrl	ICD
6	SO	JJ357	-26.929106666666666	WT	ICD-Ctrl	ICD
6	SO	JJ358	-32.11682400000001	WT	ICD-Ctrl	ICD
6	SO	JJ362	0.832793	FKRPMut	FKRP-Mutant	FKRP
6	SO	JJ363	0.24455766666665113	FKRPMut	FKRP-Mutant	FKRP
6	SO	JJ364	0.9129906666667011	FKRPMut	FKRP-Mutant	FKRP
6	SO	JJ365	-3.2524279999999997	FKRPMut	FKRP-Mutant	FKRP
6	SO	JJ369	-41.94238033333335	WT	FKRP-Ctrl	FKRP
6	SO	JJ370	-36.74756399999999	WT	FKRP-Ctrl	FKRP
6	SO	JJ371	-21.294419333333355	WT	FKRP-Ctrl	FKRP
6	SO	JJ372	-36.041441666666664	WT	FKRP-Ctrl	FKRP
6	SO	JJ373	95.25590266666664	Emx-Cre+;DGF/-	Emx-DG-cKO	Emx-DG
6	SO	JJ374	22.53289033333334	Emx-Cre+;DGF/-	Emx-DG-cKO	Emx-DG
6	SO	JJ375	77.87749533333333	Emx-Cre+;DGF/-	Emx-DG-cKO	Emx-DG
6	SO	JJ376	-14.395425666666654	Emx-Cre+;DGF/-	Emx-DG-cKO	Emx-DG
6	SO	JJ377	41.017290333333314	Emx-Cre+;DGF/-	Emx-DG-cKO	Emx-DG
6	SO	JJ378	24.19868066666669	Emx-Cre+;DGF/-	Emx-DG-cKO	Emx-DG
6	SO	JJ379	29.54437333333334	Emx-Cre+;DGF/-	Emx-DG-cKO	Emx-DG
6	SO	JJ380	25.35360800000001	Emx-Cre+;DGF/-	Emx-DG-cKO	Emx-DG
6	SO	JJ381	-29.30056833333333	Emx-Cre+;DGF/+	Emx-DG-Ctrl	Emx-DG
6	SO	JJ382	-14.297233333333319	Emx-Cre+;DGF/+	Emx-DG-Ctrl	Emx-DG
6	SO	JJ384	-20.736622999999998	Emx-Cre+;DGF/+	Emx-DG-Ctrl	Emx-DG
6	SO	JJ385	-22.071094000000016	Emx-Cre+;DGF/-	Emx-DG-cKO	Emx-DG
6	SO	JJ386	-23.30094950000001	Emx-Cre+;DGF/-	Emx-DG-cKO	Emx-DG
6	SO	JJ387	35.005319	Emx-Cre+;DGF/-	Emx-DG-cKO	Emx-DG
6	SO	JJ388	9.234936833333327	Emx-Cre+;DGF/+	Emx-DG-Ctrl	Emx-DG
6	SO	JJ388	9.234936833333327	Emx-Cre+;DGF/+	Emx-DG-Ctrl	Emx-DG
6	SO	JJ389	81.94248	Emx-Cre+;DGF/+	Emx-DG-Ctrl	Emx-DG
6	SO	JJ390	15.427413000000001	Emx-Cre+;DGF/+	Emx-DG-Ctrl	Emx-DG
6	SO	JJ391	20.896796000000005	Emx-Cre+;DGF/+	Emx-DG-Ctrl	Emx-DG
6	SO	JJ392	4.322935333333334	Emx-Cre+;DGF/+	Emx-DG-Ctrl	Emx-DG
7	SO	JJ001	-33.37826233333333	Emx-Cre+;POMT2F/+	Emx-POMT2-Ctrl	Emx-POMT2
7	SO	JJ002	33.542320999999994	Emx-Cre+;POMT2F/F	Emx-POMT2-cKO	Emx-POMT2
7	SO	JJ003	-25.436685999999984	Emx-Cre+;POMT2F/+	Emx-POMT2-Ctrl	Emx-POMT2
7	SO	JJ004	-37.90260133333333	Emx-Cre+;POMT2F/+	Emx-POMT2-Ctrl	Emx-POMT2
7	SO	JJ005	-36.71914866666666	Emx-Cre+;POMT2F/+	Emx-POMT2-Ctrl	Emx-POMT2
7	SO	JJ006	56.96148766666667	Emx-Cre+;POMT2F/F	Emx-POMT2-cKO	Emx-POMT2
7	SO	JJ007	-0.5165713333333315	Emx-Cre+;POMT2F/F	Emx-POMT2-cKO	Emx-POMT2
7	SO	JJ008	25.609186000000005	Emx-Cre+;POMT2F/F	Emx-POMT2-cKO	Emx-POMT2
7	SO	JJ029	-48.18045966666668	WT	B4GAT1-Ctrl	B4GAT1
7	SO	JJ030	-53.968312000000005	WT	B4GAT1-Ctrl	B4GAT1
7	SO	JJ031	-47.90744666666668	WT	B4GAT1-Ctrl	B4GAT1
7	SO	JJ032	-59.98007066666668	WT	B4GAT1-Ctrl	B4GAT1
7	SO	JJ033	-7.315057666666661	B4GAT1M155T/M155T	B4GAT1-Mutant	B4GAT1
7	SO	JJ034	-3.9392113333333327	B4GAT1M155T/M155T	B4GAT1-Mutant	B4GAT1
7	SO	JJ035	10.551451333333299	B4GAT1M155T/M155T	B4GAT1-Mutant	B4GAT1
7	SO	JJ036	38.69517666666667	B4GAT1M155T/M155T	B4GAT1-Mutant	B4GAT1
7	SO	JJ061	-15.152678666666665	B4GAT1M155T/M155T	B4GAT1-Mutant	B4GAT1
7	SO	JJ062	-21.781796333333318	B4GAT1M155T/M155T	B4GAT1-Mutant	B4GAT1
7	SO	JJ063	-14.764475999999982	B4GAT1M155T/M155T	B4GAT1-Mutant	B4GAT1
7	SO	JJ064	3.235293666666678	B4GAT1M155T/M155T	B4GAT1-Mutant	B4GAT1
7	SO	JJ065	-11.797688666666678	B4GAT1M155T/M155T	B4GAT1-Mutant	B4GAT1
7	SO	JJ066	-13.739208999999997	B4GAT1M155T/M155T	B4GAT1-Mutant	B4GAT1
7	SO	JJ067	-19.441165333333334	B4GAT1M155T/M155T	B4GAT1-Mutant	B4GAT1
7	SO	JJ068	4.615682000000002	B4GAT1M155T/M155T	B4GAT1-Mutant	B4GAT1
7	SO	JJ077	30.14765866666666	B4GAT1M155T/M155T	B4GAT1-Mutant	B4GAT1
7	SO	JJ078	-22.616234666666667	B4GAT1M155T/M155T	B4GAT1-Mutant	B4GAT1
7	SO	JJ079	25.158135333333348	B4GAT1M155T/M155T	B4GAT1-Mutant	B4GAT1
7	SO	JJ080	-17.475695000000012	B4GAT1M155T/M155T	B4GAT1-Mutant	B4GAT1
7	SO	JJ089	105.15006966666665	B4GAT1M155T/M155T	B4GAT1-Mutant	B4GAT1
7	SO	JJ090	13.096392999999978	B4GAT1M155T/M155T	B4GAT1-Mutant	B4GAT1
7	SO	JJ091	-6.0977176666666635	B4GAT1M155T/M155T	B4GAT1-Mutant	B4GAT1
7	SO	JJ092	-20.399776000000003	B4GAT1M155T/M155T	B4GAT1-Mutant	B4GAT1
7	SO	JJ093	-1.6965870000000034	WT	B4GAT1-Ctrl	B4GAT1
7	SO	JJ094	-31.27674033333331	WT	B4GAT1-Ctrl	B4GAT1
7	SO	JJ095	-60.76517399999998	WT	B4GAT1-Ctrl	B4GAT1
7	SO	JJ096	-27.229898666666667	WT	B4GAT1-Ctrl	B4GAT1
7	SO	JJ101	-3.418723666666684	WT	B4GAT1-Ctrl	B4GAT1
7	SO	JJ102	-27.104730999999976	WT	B4GAT1-Ctrl	B4GAT1
7	SO	JJ103	81.75138033333336	WT	B4GAT1-Ctrl	B4GAT1
7	SO	JJ104	-30.93622266666665	WT	B4GAT1-Ctrl	B4GAT1
7	SO	JJ111	108.46012799999995	Emx-Cre+;DGF/-	Emx-DG-cKO	Emx-DG
7	SO	JJ112	86.17388399999999	Emx-Cre+;DGF/-	Emx-DG-cKO	Emx-DG
7	SO	JJ113	82.53113566666666	Emx-Cre+;DGF/-	Emx-DG-cKO	Emx-DG
7	SO	JJ118	100.27531366666665	Emx-Cre+;DGF/-	Emx-DG-cKO	Emx-DG
7	SO	JJ119	7.223894999999989	Emx-Cre+;DGF/-	Emx-DG-cKO	Emx-DG
7	SO	JJ120	4.9272443333333245	Emx-Cre+;DGF/-	Emx-DG-cKO	Emx-DG
7	SO	JJ121	-7.295003333333331	Emx-Cre+;DGF/-	Emx-DG-cKO	Emx-DG
7	SO	JJ134	-32.51307966666667	Emx-Cre+;DGF/+	Emx-DG-Ctrl	Emx-DG
7	SO	JJ135	6.796219666666673	Emx-Cre+;DGF/+	Emx-DG-Ctrl	Emx-DG
7	SO	JJ136	7.533212333333324	Emx-Cre+;DGF/+	Emx-DG-Ctrl	Emx-DG
7	SO	JJ137	-4.056215333333323	Emx-Cre+;DGF/+	Emx-DG-Ctrl	Emx-DG
7	SO	JJ150	71.56441566666668	Emx-Cre+;POMT2F/F	Emx-POMT2-cKO	Emx-POMT2
7	SO	JJ151	57.54908133333333	Emx-Cre+;POMT2F/F	Emx-POMT2-cKO	Emx-POMT2
7	SO	JJ152	184.63338666666664	Emx-Cre+;POMT2F/F	Emx-POMT2-cKO	Emx-POMT2
7	SO	JJ153	116.81132500000001	Emx-Cre+;POMT2F/F	Emx-POMT2-cKO	Emx-POMT2
7	SO	JJ154	-21.608087666666677	Emx-Cre+;POMT2F/+	Emx-POMT2-Ctrl	Emx-POMT2
7	SO	JJ155	-86.37368633333332	Emx-Cre+;POMT2F/+	Emx-POMT2-Ctrl	Emx-POMT2
7	SO	JJ156	-54.51551666666668	Emx-Cre+;POMT2F/+	Emx-POMT2-Ctrl	Emx-POMT2
7	SO	JJ157	-41.92105399999999	Emx-Cre+;POMT2F/+	Emx-POMT2-Ctrl	Emx-POMT2
7	SO	JJ227	44.305431333333324	Emx-Cre+;POMT2F/F	Emx-POMT2-cKO	Emx-POMT2
7	SO	JJ228	27.467736666666667	Emx-Cre+;POMT2F/F	Emx-POMT2-cKO	Emx-POMT2
7	SO	JJ229	13.407443666666657	Emx-Cre+;POMT2F/F	Emx-POMT2-cKO	Emx-POMT2
7	SO	JJ230	23.090101333333337	Emx-Cre+;POMT2F/F	Emx-POMT2-cKO	Emx-POMT2
7	SO	JJ235	4.7334299999999985	Emx-Cre+;POMT2F/+	Emx-POMT2-Ctrl	Emx-POMT2
7	SO	JJ236	-20.505478999999998	Emx-Cre+;POMT2F/+	Emx-POMT2-Ctrl	Emx-POMT2
7	SO	JJ237	-11.966236666666674	Emx-Cre+;POMT2F/+	Emx-POMT2-Ctrl	Emx-POMT2
7	SO	JJ238	8.808936999999995	Emx-Cre+;POMT2F/+	Emx-POMT2-Ctrl	Emx-POMT2
7	SO	JJ243	3.733951666666646	Emx-Cre+;POMT2F/+	Emx-POMT2-Ctrl	Emx-POMT2
7	SO	JJ244	14.345183	Emx-Cre+;POMT2F/+	Emx-POMT2-Ctrl	Emx-POMT2
7	SO	JJ245	-11.996267999999995	Emx-Cre+;POMT2F/+	Emx-POMT2-Ctrl	Emx-POMT2
7	SO	JJ246	-8.71816233333333	Emx-Cre+;POMT2F/+	Emx-POMT2-Ctrl	Emx-POMT2
7	SO	JJ247	105.71905100000002	FKRPMut	FKRP-Mutant	FKRP
7	SO	JJ248	9.321847999999989	FKRPMut	FKRP-Mutant	FKRP
7	SO	JJ249	-18.362201999999996	FKRPMut	FKRP-Mutant	FKRP
7	SO	JJ250	-39.78901366666667	FKRPMut	FKRP-Mutant	FKRP
7	SO	JJ251	14.546960333333336	WT	FKRP-Ctrl	FKRP
7	SO	JJ252	-3.5139400000000003	WT	FKRP-Ctrl	FKRP
7	SO	JJ253	-24.484398666666664	WT	FKRP-Ctrl	FKRP
7	SO	JJ254	20.046773333333316	WT	FKRP-Ctrl	FKRP
7	SO	JJ255	-38.35363333333331	WT	FKRP-Ctrl	FKRP
7	SO	JJ256	60.557016	WT	FKRP-Ctrl	FKRP
7	SO	JJ257	-52.160083333333354	WT	FKRP-Ctrl	FKRP
7	SO	JJ258	-19.827372000000008	WT	FKRP-Ctrl	FKRP
7	SO	JJ259	18.72669	FKRPMut	FKRP-Mutant	FKRP
7	SO	JJ260	5.216900333333342	FKRPMut	FKRP-Mutant	FKRP
7	SO	JJ261	-0.25298433333330195	FKRPMut	FKRP-Mutant	FKRP
7	SO	JJ262	0.47551133333333456	FKRPMut	FKRP-Mutant	FKRP
7	SO	JJ263	-37.006882666666705	WT	FKRP-Ctrl	FKRP
7	SO	JJ264	-23.841424999999997	WT	FKRP-Ctrl	FKRP
7	SO	JJ265	-13.716482000000005	WT	FKRP-Ctrl	FKRP
7	SO	JJ266	-35.93238333333333	WT	FKRP-Ctrl	FKRP
7	SO	JJ299	4.084290666666675	DGdelta/-	ICD-Mutant	ICD
7	SO	JJ300	-33.11410000000001	DGdelta/-	ICD-Mutant	ICD
7	SO	JJ301	38.02159533333332	DGdelta/-	ICD-Mutant	ICD
7	SO	JJ302	-4.868555999999974	DGdelta/-	ICD-Mutant	ICD
7	SO	JJ307	4.197954333333352	WT	ICD-Ctrl	ICD
7	SO	JJ308	-2.5634189999999912	WT	ICD-Ctrl	ICD
7	SO	JJ309	-37.37069966666667	WT	ICD-Ctrl	ICD
7	SO	JJ310	15.401910000000024	WT	ICD-Ctrl	ICD
7	SO	JJ331	-11.691714666666693	DGdelta/-	ICD-Mutant	ICD
7	SO	JJ332	26.891422999999975	DGdelta/-	ICD-Mutant	ICD
7	SO	JJ333	-23.032137333333328	DGdelta/-	ICD-Mutant	ICD
7	SO	JJ334	-43.56682533333333	DGdelta/-	ICD-Mutant	ICD
7	SO	JJ339	-15.829960333333323	DGdelta/-	ICD-Mutant	ICD
7	SO	JJ340	4.188793333333327	DGdelta/-	ICD-Mutant	ICD
7	SO	JJ341	-7.777114333333334	DGdelta/-	ICD-Mutant	ICD
7	SO	JJ342	35.091656666666665	DGdelta/-	ICD-Mutant	ICD
7	SO	JJ347	13.609649666666655	WT	ICD-Ctrl	ICD
7	SO	JJ348	14.662575999999993	WT	ICD-Ctrl	ICD
7	SO	JJ349	-18.46043666666667	WT	ICD-Ctrl	ICD
7	SO	JJ350	-14.606233333333316	WT	ICD-Ctrl	ICD
7	SO	JJ355	-7.844900666666679	WT	ICD-Ctrl	ICD
7	SO	JJ356	-33.50845333333333	WT	ICD-Ctrl	ICD
7	SO	JJ357	-20.109106666666673	WT	ICD-Ctrl	ICD
7	SO	JJ358	-37.32057400000002	WT	ICD-Ctrl	ICD
7	SO	JJ362	7.074126333333349	FKRPMut	FKRP-Mutant	FKRP
7	SO	JJ363	5.538557666666634	FKRPMut	FKRP-Mutant	FKRP
7	SO	JJ364	1.660407333333353	FKRPMut	FKRP-Mutant	FKRP
7	SO	JJ365	-6.411761333333335	FKRPMut	FKRP-Mutant	FKRP
7	SO	JJ369	-16.107130333333334	WT	FKRP-Ctrl	FKRP
7	SO	JJ370	-40.99364733333332	WT	FKRP-Ctrl	FKRP
7	SO	JJ371	-22.686419333333344	WT	FKRP-Ctrl	FKRP
7	SO	JJ372	-33.42735833333332	WT	FKRP-Ctrl	FKRP
7	SO	JJ373	78.71840266666665	Emx-Cre+;DGF/-	Emx-DG-cKO	Emx-DG
7	SO	JJ374	27.962056999999998	Emx-Cre+;DGF/-	Emx-DG-cKO	Emx-DG
7	SO	JJ375	58.01149533333332	Emx-Cre+;DGF/-	Emx-DG-cKO	Emx-DG
7	SO	JJ376	-3.5992590000000084	Emx-Cre+;DGF/-	Emx-DG-cKO	Emx-DG
7	SO	JJ377	32.03737366666667	Emx-Cre+;DGF/-	Emx-DG-cKO	Emx-DG
7	SO	JJ378	58.83984733333332	Emx-Cre+;DGF/-	Emx-DG-cKO	Emx-DG
7	SO	JJ379	49.21354	Emx-Cre+;DGF/-	Emx-DG-cKO	Emx-DG
7	SO	JJ380	31.492941333333345	Emx-Cre+;DGF/-	Emx-DG-cKO	Emx-DG
7	SO	JJ381	-35.76106833333335	Emx-Cre+;DGF/+	Emx-DG-Ctrl	Emx-DG
7	SO	JJ382	-11.990316666666672	Emx-Cre+;DGF/+	Emx-DG-Ctrl	Emx-DG
7	SO	JJ384	-26.75370633333331	Emx-Cre+;DGF/+	Emx-DG-Ctrl	Emx-DG
7	SO	JJ385	-36.39959400000001	Emx-Cre+;DGF/-	Emx-DG-cKO	Emx-DG
7	SO	JJ386	-18.5435745	Emx-Cre+;DGF/-	Emx-DG-cKO	Emx-DG
7	SO	JJ387	36.196944	Emx-Cre+;DGF/-	Emx-DG-cKO	Emx-DG
7	SO	JJ388	4.631186833333331	Emx-Cre+;DGF/+	Emx-DG-Ctrl	Emx-DG
7	SO	JJ388	4.631186833333331	Emx-Cre+;DGF/+	Emx-DG-Ctrl	Emx-DG
7	SO	JJ389	90.85439666666666	Emx-Cre+;DGF/+	Emx-DG-Ctrl	Emx-DG
7	SO	JJ390	21.335079666666662	Emx-Cre+;DGF/+	Emx-DG-Ctrl	Emx-DG
7	SO	JJ391	25.399796	Emx-Cre+;DGF/+	Emx-DG-Ctrl	Emx-DG
7	SO	JJ392	-1.7198146666666787	Emx-Cre+;DGF/+	Emx-DG-Ctrl	Emx-DG
8	SO	JJ001	-39.526928999999996	Emx-Cre+;POMT2F/+	Emx-POMT2-Ctrl	Emx-POMT2
8	SO	JJ002	75.61778766666667	Emx-Cre+;POMT2F/F	Emx-POMT2-cKO	Emx-POMT2
8	SO	JJ003	-14.744635999999986	Emx-Cre+;POMT2F/+	Emx-POMT2-Ctrl	Emx-POMT2
8	SO	JJ004	-25.915351333333337	Emx-Cre+;POMT2F/+	Emx-POMT2-Ctrl	Emx-POMT2
8	SO	JJ005	-36.12234866666667	Emx-Cre+;POMT2F/+	Emx-POMT2-Ctrl	Emx-POMT2
8	SO	JJ006	107.27873766666669	Emx-Cre+;POMT2F/F	Emx-POMT2-cKO	Emx-POMT2
8	SO	JJ007	8.881362000000005	Emx-Cre+;POMT2F/F	Emx-POMT2-cKO	Emx-POMT2
8	SO	JJ008	46.00111933333334	Emx-Cre+;POMT2F/F	Emx-POMT2-cKO	Emx-POMT2
8	SO	JJ029	-22.862476333333337	WT	B4GAT1-Ctrl	B4GAT1
8	SO	JJ030	-35.13314533333332	WT	B4GAT1-Ctrl	B4GAT1
8	SO	JJ031	-51.73501333333335	WT	B4GAT1-Ctrl	B4GAT1
8	SO	JJ032	-55.06515400000003	WT	B4GAT1-Ctrl	B4GAT1
8	SO	JJ033	-0.9699743333333402	B4GAT1M155T/M155T	B4GAT1-Mutant	B4GAT1
8	SO	JJ034	0.014888666666668843	B4GAT1M155T/M155T	B4GAT1-Mutant	B4GAT1
8	SO	JJ035	24.213067999999964	B4GAT1M155T/M155T	B4GAT1-Mutant	B4GAT1
8	SO	JJ036	28.694909999999993	B4GAT1M155T/M155T	B4GAT1-Mutant	B4GAT1
8	SO	JJ061	-24.12509533333333	B4GAT1M155T/M155T	B4GAT1-Mutant	B4GAT1
8	SO	JJ062	-17.46894633333333	B4GAT1M155T/M155T	B4GAT1-Mutant	B4GAT1
8	SO	JJ063	-2.169959333333319	B4GAT1M155T/M155T	B4GAT1-Mutant	B4GAT1
8	SO	JJ064	1.3074936666666683	B4GAT1M155T/M155T	B4GAT1-Mutant	B4GAT1
8	SO	JJ065	-17.93150533333333	B4GAT1M155T/M155T	B4GAT1-Mutant	B4GAT1
8	SO	JJ066	2.941857666666664	B4GAT1M155T/M155T	B4GAT1-Mutant	B4GAT1
8	SO	JJ067	-26.029432000000003	B4GAT1M155T/M155T	B4GAT1-Mutant	B4GAT1
8	SO	JJ068	-24.856134666666673	B4GAT1M155T/M155T	B4GAT1-Mutant	B4GAT1
8	SO	JJ077	22.70800866666667	B4GAT1M155T/M155T	B4GAT1-Mutant	B4GAT1
8	SO	JJ078	-38.09113466666667	B4GAT1M155T/M155T	B4GAT1-Mutant	B4GAT1
8	SO	JJ079	11.397802000000013	B4GAT1M155T/M155T	B4GAT1-Mutant	B4GAT1
8	SO	JJ080	-12.003661666666678	B4GAT1M155T/M155T	B4GAT1-Mutant	B4GAT1
8	SO	JJ089	108.29896966666666	B4GAT1M155T/M155T	B4GAT1-Mutant	B4GAT1
8	SO	JJ090	17.121526333333332	B4GAT1M155T/M155T	B4GAT1-Mutant	B4GAT1
8	SO	JJ091	-15.774901	B4GAT1M155T/M155T	B4GAT1-Mutant	B4GAT1
8	SO	JJ092	-21.050492666666667	B4GAT1M155T/M155T	B4GAT1-Mutant	B4GAT1
8	SO	JJ093	-12.23847033333332	WT	B4GAT1-Ctrl	B4GAT1
8	SO	JJ094	-37.653290333333324	WT	B4GAT1-Ctrl	B4GAT1
8	SO	JJ095	-46.08995733333334	WT	B4GAT1-Ctrl	B4GAT1
8	SO	JJ096	-35.59806533333333	WT	B4GAT1-Ctrl	B4GAT1
8	SO	JJ101	6.332626333333356	WT	B4GAT1-Ctrl	B4GAT1
8	SO	JJ102	-40.40086433333331	WT	B4GAT1-Ctrl	B4GAT1
8	SO	JJ103	75.869897	WT	B4GAT1-Ctrl	B4GAT1
8	SO	JJ104	-43.453372666666674	WT	B4GAT1-Ctrl	B4GAT1
8	SO	JJ111	94.90521133333333	Emx-Cre+;DGF/-	Emx-DG-cKO	Emx-DG
8	SO	JJ112	78.96995066666666	Emx-Cre+;DGF/-	Emx-DG-cKO	Emx-DG
8	SO	JJ113	83.68933566666668	Emx-Cre+;DGF/-	Emx-DG-cKO	Emx-DG
8	SO	JJ118	109.0845803333333	Emx-Cre+;DGF/-	Emx-DG-cKO	Emx-DG
8	SO	JJ119	6.5165783333333325	Emx-Cre+;DGF/-	Emx-DG-cKO	Emx-DG
8	SO	JJ120	27.244560999999987	Emx-Cre+;DGF/-	Emx-DG-cKO	Emx-DG
8	SO	JJ121	-11.415636666666662	Emx-Cre+;DGF/-	Emx-DG-cKO	Emx-DG
8	SO	JJ134	-12.909729666666655	Emx-Cre+;DGF/+	Emx-DG-Ctrl	Emx-DG
8	SO	JJ135	-1.4777136666666593	Emx-Cre+;DGF/+	Emx-DG-Ctrl	Emx-DG
8	SO	JJ136	-4.544087666666665	Emx-Cre+;DGF/+	Emx-DG-Ctrl	Emx-DG
8	SO	JJ137	2.8113013333333563	Emx-Cre+;DGF/+	Emx-DG-Ctrl	Emx-DG
8	SO	JJ150	45.160515666666676	Emx-Cre+;POMT2F/F	Emx-POMT2-cKO	Emx-POMT2
8	SO	JJ151	78.43749799999999	Emx-Cre+;POMT2F/F	Emx-POMT2-cKO	Emx-POMT2
8	SO	JJ152	140.65905333333333	Emx-Cre+;POMT2F/F	Emx-POMT2-cKO	Emx-POMT2
8	SO	JJ153	136.58470833333334	Emx-Cre+;POMT2F/F	Emx-POMT2-cKO	Emx-POMT2
8	SO	JJ154	-53.013921	Emx-Cre+;POMT2F/+	Emx-POMT2-Ctrl	Emx-POMT2
8	SO	JJ155	-42.11860300000001	Emx-Cre+;POMT2F/+	Emx-POMT2-Ctrl	Emx-POMT2
8	SO	JJ156	-32.111100000000015	Emx-Cre+;POMT2F/+	Emx-POMT2-Ctrl	Emx-POMT2
8	SO	JJ157	-42.91583733333334	Emx-Cre+;POMT2F/+	Emx-POMT2-Ctrl	Emx-POMT2
8	SO	JJ227	36.30851466666666	Emx-Cre+;POMT2F/F	Emx-POMT2-cKO	Emx-POMT2
8	SO	JJ228	17.189253333333323	Emx-Cre+;POMT2F/F	Emx-POMT2-cKO	Emx-POMT2
8	SO	JJ229	16.35711033333335	Emx-Cre+;POMT2F/F	Emx-POMT2-cKO	Emx-POMT2
8	SO	JJ230	13.879017999999993	Emx-Cre+;POMT2F/F	Emx-POMT2-cKO	Emx-POMT2
8	SO	JJ235	-18.13993666666667	Emx-Cre+;POMT2F/+	Emx-POMT2-Ctrl	Emx-POMT2
8	SO	JJ236	-12.206945666666675	Emx-Cre+;POMT2F/+	Emx-POMT2-Ctrl	Emx-POMT2
8	SO	JJ237	-14.026236666666668	Emx-Cre+;POMT2F/+	Emx-POMT2-Ctrl	Emx-POMT2
8	SO	JJ238	10.538920333333332	Emx-Cre+;POMT2F/+	Emx-POMT2-Ctrl	Emx-POMT2
8	SO	JJ243	23.680268333333316	Emx-Cre+;POMT2F/+	Emx-POMT2-Ctrl	Emx-POMT2
8	SO	JJ244	6.712149666666657	Emx-Cre+;POMT2F/+	Emx-POMT2-Ctrl	Emx-POMT2
8	SO	JJ245	-19.36315133333333	Emx-Cre+;POMT2F/+	Emx-POMT2-Ctrl	Emx-POMT2
8	SO	JJ246	-2.8759789999999916	Emx-Cre+;POMT2F/+	Emx-POMT2-Ctrl	Emx-POMT2
8	SO	JJ247	85.76545100000003	FKRPMut	FKRP-Mutant	FKRP
8	SO	JJ248	-0.8206686666666769	FKRPMut	FKRP-Mutant	FKRP
8	SO	JJ249	-29.986018666666656	FKRPMut	FKRP-Mutant	FKRP
8	SO	JJ250	-36.09733033333333	FKRPMut	FKRP-Mutant	FKRP
8	SO	JJ251	7.34831033333333	WT	FKRP-Ctrl	FKRP
8	SO	JJ252	15.680710000000014	WT	FKRP-Ctrl	FKRP
8	SO	JJ253	-19.630615333333328	WT	FKRP-Ctrl	FKRP
8	SO	JJ254	-1.229076666666676	WT	FKRP-Ctrl	FKRP
8	SO	JJ255	-17.728916666666652	WT	FKRP-Ctrl	FKRP
8	SO	JJ256	37.94386599999999	WT	FKRP-Ctrl	FKRP
8	SO	JJ257	-45.775733333333356	WT	FKRP-Ctrl	FKRP
8	SO	JJ258	-31.052205333333337	WT	FKRP-Ctrl	FKRP
8	SO	JJ259	19.00069000000002	FKRPMut	FKRP-Mutant	FKRP
8	SO	JJ260	22.60291700000001	FKRPMut	FKRP-Mutant	FKRP
8	SO	JJ261	-14.599500999999984	FKRPMut	FKRP-Mutant	FKRP
8	SO	JJ262	-0.8694386666666484	FKRPMut	FKRP-Mutant	FKRP
8	SO	JJ263	-24.66978266666668	WT	FKRP-Ctrl	FKRP
8	SO	JJ264	-20.083358333333337	WT	FKRP-Ctrl	FKRP
8	SO	JJ265	-5.89618200000001	WT	FKRP-Ctrl	FKRP
8	SO	JJ266	-31.60398333333332	WT	FKRP-Ctrl	FKRP
8	SO	JJ299	8.963390666666632	DGdelta/-	ICD-Mutant	ICD
8	SO	JJ300	12.449999999999969	DGdelta/-	ICD-Mutant	ICD
8	SO	JJ301	29.02307866666668	DGdelta/-	ICD-Mutant	ICD
8	SO	JJ302	20.26202733333336	DGdelta/-	ICD-Mutant	ICD
8	SO	JJ307	11.409771000000015	WT	ICD-Ctrl	ICD
8	SO	JJ308	-19.635502333333324	WT	ICD-Ctrl	ICD
8	SO	JJ309	-10.963249666666647	WT	ICD-Ctrl	ICD
8	SO	JJ310	28.903926666666678	WT	ICD-Ctrl	ICD
8	SO	JJ331	16.763251999999984	DGdelta/-	ICD-Mutant	ICD
8	SO	JJ332	7.894189666666648	DGdelta/-	ICD-Mutant	ICD
8	SO	JJ333	-16.242320666666654	DGdelta/-	ICD-Mutant	ICD
8	SO	JJ334	-15.921925333333329	DGdelta/-	ICD-Mutant	ICD
8	SO	JJ339	-32.750160333333305	DGdelta/-	ICD-Mutant	ICD
8	SO	JJ340	25.142860000000002	DGdelta/-	ICD-Mutant	ICD
8	SO	JJ341	-4.289197666666648	DGdelta/-	ICD-Mutant	ICD
8	SO	JJ342	33.68042333333335	DGdelta/-	ICD-Mutant	ICD
8	SO	JJ347	7.439182999999995	WT	ICD-Ctrl	ICD
8	SO	JJ348	-8.031157333333349	WT	ICD-Ctrl	ICD
8	SO	JJ349	-24.206103333333346	WT	ICD-Ctrl	ICD
8	SO	JJ350	-16.235600000000005	WT	ICD-Ctrl	ICD
8	SO	JJ355	1.3568493333333531	WT	ICD-Ctrl	ICD
8	SO	JJ356	-27.59681999999998	WT	ICD-Ctrl	ICD
8	SO	JJ357	-24.70180666666666	WT	ICD-Ctrl	ICD
8	SO	JJ358	-33.64714066666668	WT	ICD-Ctrl	ICD
8	SO	JJ362	-8.80569033333334	FKRPMut	FKRP-Mutant	FKRP
8	SO	JJ363	2.5718743333333123	FKRPMut	FKRP-Mutant	FKRP
8	SO	JJ364	12.757290666666696	FKRPMut	FKRP-Mutant	FKRP
8	SO	JJ365	-3.4475613333333306	FKRPMut	FKRP-Mutant	FKRP
8	SO	JJ369	-9.606946999999991	WT	FKRP-Ctrl	FKRP
8	SO	JJ370	-36.43348066666666	WT	FKRP-Ctrl	FKRP
8	SO	JJ371	-13.659152666666662	WT	FKRP-Ctrl	FKRP
8	SO	JJ372	-25.059341666666636	WT	FKRP-Ctrl	FKRP
8	SO	JJ373	44.85515266666666	Emx-Cre+;DGF/-	Emx-DG-cKO	Emx-DG
8	SO	JJ374	25.711473666666677	Emx-Cre+;DGF/-	Emx-DG-cKO	Emx-DG
8	SO	JJ375	57.77409533333334	Emx-Cre+;DGF/-	Emx-DG-cKO	Emx-DG
8	SO	JJ376	-7.415475666666661	Emx-Cre+;DGF/-	Emx-DG-cKO	Emx-DG
8	SO	JJ377	36.87382366666666	Emx-Cre+;DGF/-	Emx-DG-cKO	Emx-DG
8	SO	JJ378	52.19786399999998	Emx-Cre+;DGF/-	Emx-DG-cKO	Emx-DG
8	SO	JJ379	24.52224000000001	Emx-Cre+;DGF/-	Emx-DG-cKO	Emx-DG
8	SO	JJ380	50.80972466666666	Emx-Cre+;DGF/-	Emx-DG-cKO	Emx-DG
8	SO	JJ381	-38.534668333333336	Emx-Cre+;DGF/+	Emx-DG-Ctrl	Emx-DG
8	SO	JJ382	-8.916533333333328	Emx-Cre+;DGF/+	Emx-DG-Ctrl	Emx-DG
8	SO	JJ384	-23.147073000000006	Emx-Cre+;DGF/+	Emx-DG-Ctrl	Emx-DG
8	SO	JJ385	-40.58684400000001	Emx-Cre+;DGF/-	Emx-DG-cKO	Emx-DG
8	SO	JJ386	-19.704299500000005	Emx-Cre+;DGF/-	Emx-DG-cKO	Emx-DG
8	SO	JJ387	40.987744000000006	Emx-Cre+;DGF/-	Emx-DG-cKO	Emx-DG
8	SO	JJ388	11.394495166666667	Emx-Cre+;DGF/+	Emx-DG-Ctrl	Emx-DG
8	SO	JJ388	11.394495166666667	Emx-Cre+;DGF/+	Emx-DG-Ctrl	Emx-DG
8	SO	JJ389	96.1490133333333	Emx-Cre+;DGF/+	Emx-DG-Ctrl	Emx-DG
8	SO	JJ390	26.464713	Emx-Cre+;DGF/+	Emx-DG-Ctrl	Emx-DG
8	SO	JJ391	27.453029333333337	Emx-Cre+;DGF/+	Emx-DG-Ctrl	Emx-DG
8	SO	JJ392	-3.88036466666667	Emx-Cre+;DGF/+	Emx-DG-Ctrl	Emx-DG
9	SO	JJ001	-29.057179	Emx-Cre+;POMT2F/+	Emx-POMT2-Ctrl	Emx-POMT2
9	SO	JJ002	81.77948766666664	Emx-Cre+;POMT2F/F	Emx-POMT2-cKO	Emx-POMT2
9	SO	JJ003	-12.281019333333324	Emx-Cre+;POMT2F/+	Emx-POMT2-Ctrl	Emx-POMT2
9	SO	JJ004	15.270982000000004	Emx-Cre+;POMT2F/+	Emx-POMT2-Ctrl	Emx-POMT2
9	SO	JJ005	-25.54664866666667	Emx-Cre+;POMT2F/+	Emx-POMT2-Ctrl	Emx-POMT2
9	SO	JJ006	145.53940433333335	Emx-Cre+;POMT2F/F	Emx-POMT2-cKO	Emx-POMT2
9	SO	JJ007	25.355762000000016	Emx-Cre+;POMT2F/F	Emx-POMT2-cKO	Emx-POMT2
9	SO	JJ008	53.006269333333336	Emx-Cre+;POMT2F/F	Emx-POMT2-cKO	Emx-POMT2
9	SO	JJ029	-20.17920966666667	WT	B4GAT1-Ctrl	B4GAT1
9	SO	JJ030	-25.38614533333333	WT	B4GAT1-Ctrl	B4GAT1
9	SO	JJ031	-43.57869666666667	WT	B4GAT1-Ctrl	B4GAT1
9	SO	JJ032	-54.85148733333333	WT	B4GAT1-Ctrl	B4GAT1
9	SO	JJ033	-13.275224333333332	B4GAT1M155T/M155T	B4GAT1-Mutant	B4GAT1
9	SO	JJ034	-16.65779466666667	B4GAT1M155T/M155T	B4GAT1-Mutant	B4GAT1
9	SO	JJ035	42.5537013333333	B4GAT1M155T/M155T	B4GAT1-Mutant	B4GAT1
9	SO	JJ036	49.862593333333315	B4GAT1M155T/M155T	B4GAT1-Mutant	B4GAT1
9	SO	JJ061	-25.17492866666667	B4GAT1M155T/M155T	B4GAT1-Mutant	B4GAT1
9	SO	JJ062	-9.657379666666657	B4GAT1M155T/M155T	B4GAT1-Mutant	B4GAT1
9	SO	JJ063	-12.199976000000001	B4GAT1M155T/M155T	B4GAT1-Mutant	B4GAT1
9	SO	JJ064	17.822210333333345	B4GAT1M155T/M155T	B4GAT1-Mutant	B4GAT1
9	SO	JJ065	-21.466355333333336	B4GAT1M155T/M155T	B4GAT1-Mutant	B4GAT1
9	SO	JJ066	-20.08045899999999	B4GAT1M155T/M155T	B4GAT1-Mutant	B4GAT1
9	SO	JJ067	-28.569998666666674	B4GAT1M155T/M155T	B4GAT1-Mutant	B4GAT1
9	SO	JJ068	-40.38765133333334	B4GAT1M155T/M155T	B4GAT1-Mutant	B4GAT1
9	SO	JJ077	20.760075333333333	B4GAT1M155T/M155T	B4GAT1-Mutant	B4GAT1
9	SO	JJ078	-39.99823466666667	B4GAT1M155T/M155T	B4GAT1-Mutant	B4GAT1
9	SO	JJ079	-6.564114666666654	B4GAT1M155T/M155T	B4GAT1-Mutant	B4GAT1
9	SO	JJ080	-11.56536166666668	B4GAT1M155T/M155T	B4GAT1-Mutant	B4GAT1
9	SO	JJ089	142.554653	B4GAT1M155T/M155T	B4GAT1-Mutant	B4GAT1
9	SO	JJ090	11.771643000000003	B4GAT1M155T/M155T	B4GAT1-Mutant	B4GAT1
9	SO	JJ091	-13.470467666666659	B4GAT1M155T/M155T	B4GAT1-Mutant	B4GAT1
9	SO	JJ092	-17.567442666666675	B4GAT1M155T/M155T	B4GAT1-Mutant	B4GAT1
9	SO	JJ093	-13.512670333333327	WT	B4GAT1-Ctrl	B4GAT1
9	SO	JJ094	-21.222156999999992	WT	B4GAT1-Ctrl	B4GAT1
9	SO	JJ095	-35.283673999999984	WT	B4GAT1-Ctrl	B4GAT1
9	SO	JJ096	-11.588731999999993	WT	B4GAT1-Ctrl	B4GAT1
9	SO	JJ101	1.3339430000000145	WT	B4GAT1-Ctrl	B4GAT1
9	SO	JJ102	-42.35373099999998	WT	B4GAT1-Ctrl	B4GAT1
9	SO	JJ103	93.95154700000002	WT	B4GAT1-Ctrl	B4GAT1
9	SO	JJ104	-18.471305999999988	WT	B4GAT1-Ctrl	B4GAT1
9	SO	JJ111	84.26729466666664	Emx-Cre+;DGF/-	Emx-DG-cKO	Emx-DG
9	SO	JJ112	71.78996733333332	Emx-Cre+;DGF/-	Emx-DG-cKO	Emx-DG
9	SO	JJ113	94.59688566666667	Emx-Cre+;DGF/-	Emx-DG-cKO	Emx-DG
9	SO	JJ118	96.15348033333332	Emx-Cre+;DGF/-	Emx-DG-cKO	Emx-DG
9	SO	JJ119	24.14497833333333	Emx-Cre+;DGF/-	Emx-DG-cKO	Emx-DG
9	SO	JJ120	62.860494333333314	Emx-Cre+;DGF/-	Emx-DG-cKO	Emx-DG
9	SO	JJ121	-2.0833366666666677	Emx-Cre+;DGF/-	Emx-DG-cKO	Emx-DG
9	SO	JJ134	26.14392033333335	Emx-Cre+;DGF/+	Emx-DG-Ctrl	Emx-DG
9	SO	JJ135	-3.897946999999988	Emx-Cre+;DGF/+	Emx-DG-Ctrl	Emx-DG
9	SO	JJ136	-0.911371000000012	Emx-Cre+;DGF/+	Emx-DG-Ctrl	Emx-DG
9	SO	JJ137	12.307451333333347	Emx-Cre+;DGF/+	Emx-DG-Ctrl	Emx-DG
9	SO	JJ150	51.26616566666669	Emx-Cre+;POMT2F/F	Emx-POMT2-cKO	Emx-POMT2
9	SO	JJ151	107.74383133333333	Emx-Cre+;POMT2F/F	Emx-POMT2-cKO	Emx-POMT2
9	SO	JJ152	164.26905333333332	Emx-Cre+;POMT2F/F	Emx-POMT2-cKO	Emx-POMT2
9	SO	JJ153	127.33290833333335	Emx-Cre+;POMT2F/F	Emx-POMT2-cKO	Emx-POMT2
9	SO	JJ154	-47.99117100000003	Emx-Cre+;POMT2F/+	Emx-POMT2-Ctrl	Emx-POMT2
9	SO	JJ155	-42.297852999999996	Emx-Cre+;POMT2F/+	Emx-POMT2-Ctrl	Emx-POMT2
9	SO	JJ156	19.716399999999965	Emx-Cre+;POMT2F/+	Emx-POMT2-Ctrl	Emx-POMT2
9	SO	JJ157	-31.666304000000007	Emx-Cre+;POMT2F/+	Emx-POMT2-Ctrl	Emx-POMT2
9	SO	JJ227	50.14134799999999	Emx-Cre+;POMT2F/F	Emx-POMT2-cKO	Emx-POMT2
9	SO	JJ228	49.20740333333333	Emx-Cre+;POMT2F/F	Emx-POMT2-cKO	Emx-POMT2
9	SO	JJ229	32.703193666666664	Emx-Cre+;POMT2F/F	Emx-POMT2-cKO	Emx-POMT2
9	SO	JJ230	16.191101333333318	Emx-Cre+;POMT2F/F	Emx-POMT2-cKO	Emx-POMT2
9	SO	JJ235	1.0626800000000003	Emx-Cre+;POMT2F/+	Emx-POMT2-Ctrl	Emx-POMT2
9	SO	JJ236	-15.546479000000005	Emx-Cre+;POMT2F/+	Emx-POMT2-Ctrl	Emx-POMT2
9	SO	JJ237	3.0393466666666598	Emx-Cre+;POMT2F/+	Emx-POMT2-Ctrl	Emx-POMT2
9	SO	JJ238	36.26110366666666	Emx-Cre+;POMT2F/+	Emx-POMT2-Ctrl	Emx-POMT2
9	SO	JJ243	29.861701666666647	Emx-Cre+;POMT2F/+	Emx-POMT2-Ctrl	Emx-POMT2
9	SO	JJ244	17.084182999999996	Emx-Cre+;POMT2F/+	Emx-POMT2-Ctrl	Emx-POMT2
9	SO	JJ245	-8.325184666666663	Emx-Cre+;POMT2F/+	Emx-POMT2-Ctrl	Emx-POMT2
9	SO	JJ246	-10.669328999999996	Emx-Cre+;POMT2F/+	Emx-POMT2-Ctrl	Emx-POMT2
9	SO	JJ247	114.19463433333338	FKRPMut	FKRP-Mutant	FKRP
9	SO	JJ248	-12.577402000000006	FKRPMut	FKRP-Mutant	FKRP
9	SO	JJ249	-41.14361866666666	FKRPMut	FKRP-Mutant	FKRP
9	SO	JJ250	-26.91951366666667	FKRPMut	FKRP-Mutant	FKRP
9	SO	JJ251	2.761126999999997	WT	FKRP-Ctrl	FKRP
9	SO	JJ252	9.616559999999984	WT	FKRP-Ctrl	FKRP
9	SO	JJ253	-28.045232	WT	FKRP-Ctrl	FKRP
9	SO	JJ254	-17.12689333333334	WT	FKRP-Ctrl	FKRP
9	SO	JJ255	-16.268633333333316	WT	FKRP-Ctrl	FKRP
9	SO	JJ256	10.502099333333339	WT	FKRP-Ctrl	FKRP
9	SO	JJ257	-24.723750000000024	WT	FKRP-Ctrl	FKRP
9	SO	JJ258	-7.561955333333344	WT	FKRP-Ctrl	FKRP
9	SO	JJ259	18.330690000000004	FKRPMut	FKRP-Mutant	FKRP
9	SO	JJ260	35.78873366666668	FKRPMut	FKRP-Mutant	FKRP
9	SO	JJ261	-25.67723433333332	FKRPMut	FKRP-Mutant	FKRP
9	SO	JJ262	-14.136321999999998	FKRPMut	FKRP-Mutant	FKRP
9	SO	JJ263	-6.222049333333341	WT	FKRP-Ctrl	FKRP
9	SO	JJ264	-30.32617499999999	WT	FKRP-Ctrl	FKRP
9	SO	JJ265	22.29493466666666	WT	FKRP-Ctrl	FKRP
9	SO	JJ266	-41.70429999999999	WT	FKRP-Ctrl	FKRP
9	SO	JJ299	40.957290666666665	DGdelta/-	ICD-Mutant	ICD
9	SO	JJ300	12.641066666666688	DGdelta/-	ICD-Mutant	ICD
9	SO	JJ301	21.82592866666664	DGdelta/-	ICD-Mutant	ICD
9	SO	JJ302	66.56327733333335	DGdelta/-	ICD-Mutant	ICD
9	SO	JJ307	33.962954333333336	WT	ICD-Ctrl	ICD
9	SO	JJ308	-23.14041899999999	WT	ICD-Ctrl	ICD
9	SO	JJ309	-19.271449666666665	WT	ICD-Ctrl	ICD
9	SO	JJ310	53.20407666666667	WT	ICD-Ctrl	ICD
9	SO	JJ331	29.271451999999993	DGdelta/-	ICD-Mutant	ICD
9	SO	JJ332	40.584339666666644	DGdelta/-	ICD-Mutant	ICD
9	SO	JJ333	3.299446000000008	DGdelta/-	ICD-Mutant	ICD
9	SO	JJ334	-9.99265866666667	DGdelta/-	ICD-Mutant	ICD
9	SO	JJ339	-31.2147103333333	DGdelta/-	ICD-Mutant	ICD
9	SO	JJ340	44.21145999999997	DGdelta/-	ICD-Mutant	ICD
9	SO	JJ341	-4.140530999999972	DGdelta/-	ICD-Mutant	ICD
9	SO	JJ342	42.55674000000001	DGdelta/-	ICD-Mutant	ICD
9	SO	JJ347	31.191483000000005	WT	ICD-Ctrl	ICD
9	SO	JJ348	-13.041007333333349	WT	ICD-Ctrl	ICD
9	SO	JJ349	-8.204103333333345	WT	ICD-Ctrl	ICD
9	SO	JJ350	-31.896649999999994	WT	ICD-Ctrl	ICD
9	SO	JJ355	35.520932666666674	WT	ICD-Ctrl	ICD
9	SO	JJ356	-24.529453333333322	WT	ICD-Ctrl	ICD
9	SO	JJ357	-27.239189999999997	WT	ICD-Ctrl	ICD
9	SO	JJ358	-21.581824000000022	WT	ICD-Ctrl	ICD
9	SO	JJ362	2.2387096666666744	FKRPMut	FKRP-Mutant	FKRP
9	SO	JJ363	7.4921409999999655	FKRPMut	FKRP-Mutant	FKRP
9	SO	JJ364	9.565990666666684	FKRPMut	FKRP-Mutant	FKRP
9	SO	JJ365	6.940238666666677	FKRPMut	FKRP-Mutant	FKRP
9	SO	JJ369	-1.8445470000000153	WT	FKRP-Ctrl	FKRP
9	SO	JJ370	-33.00806399999997	WT	FKRP-Ctrl	FKRP
9	SO	JJ371	-19.096752666666685	WT	FKRP-Ctrl	FKRP
9	SO	JJ372	-2.4323583333333167	WT	FKRP-Ctrl	FKRP
9	SO	JJ373	27.85115266666666	Emx-Cre+;DGF/-	Emx-DG-cKO	Emx-DG
9	SO	JJ374	10.368223666666665	Emx-Cre+;DGF/-	Emx-DG-cKO	Emx-DG
9	SO	JJ375	58.26849533333333	Emx-Cre+;DGF/-	Emx-DG-cKO	Emx-DG
9	SO	JJ376	-8.602342333333334	Emx-Cre+;DGF/-	Emx-DG-cKO	Emx-DG
9	SO	JJ377	43.48320699999999	Emx-Cre+;DGF/-	Emx-DG-cKO	Emx-DG
9	SO	JJ378	55.060014	Emx-Cre+;DGF/-	Emx-DG-cKO	Emx-DG
9	SO	JJ379	27.83745666666668	Emx-Cre+;DGF/-	Emx-DG-cKO	Emx-DG
9	SO	JJ380	37.989608	Emx-Cre+;DGF/-	Emx-DG-cKO	Emx-DG
9	SO	JJ381	-19.05131833333333	Emx-Cre+;DGF/+	Emx-DG-Ctrl	Emx-DG
9	SO	JJ382	-9.44956666666667	Emx-Cre+;DGF/+	Emx-DG-Ctrl	Emx-DG
9	SO	JJ384	-14.724789666666672	Emx-Cre+;DGF/+	Emx-DG-Ctrl	Emx-DG
9	SO	JJ385	-23.40309400000001	Emx-Cre+;DGF/-	Emx-DG-cKO	Emx-DG
9	SO	JJ386	-18.1011995	Emx-Cre+;DGF/-	Emx-DG-cKO	Emx-DG
9	SO	JJ387	35.416819000000004	Emx-Cre+;DGF/-	Emx-DG-cKO	Emx-DG
9	SO	JJ388	20.617061833333338	Emx-Cre+;DGF/+	Emx-DG-Ctrl	Emx-DG
9	SO	JJ388	20.617061833333338	Emx-Cre+;DGF/+	Emx-DG-Ctrl	Emx-DG
9	SO	JJ389	92.94073000000002	Emx-Cre+;DGF/+	Emx-DG-Ctrl	Emx-DG
9	SO	JJ390	23.30632966666668	Emx-Cre+;DGF/+	Emx-DG-Ctrl	Emx-DG
9	SO	JJ391	39.794212666666674	Emx-Cre+;DGF/+	Emx-DG-Ctrl	Emx-DG
9	SO	JJ392	-5.55698133333333	Emx-Cre+;DGF/+	Emx-DG-Ctrl	Emx-DG
10	SO	JJ001	-25.343528999999993	Emx-Cre+;POMT2F/+	Emx-POMT2-Ctrl	Emx-POMT2
10	SO	JJ002	86.26265433333333	Emx-Cre+;POMT2F/F	Emx-POMT2-cKO	Emx-POMT2
10	SO	JJ003	-19.245569333333332	Emx-Cre+;POMT2F/+	Emx-POMT2-Ctrl	Emx-POMT2
10	SO	JJ004	21.297115333333334	Emx-Cre+;POMT2F/+	Emx-POMT2-Ctrl	Emx-POMT2
10	SO	JJ005	-33.582815333333336	Emx-Cre+;POMT2F/+	Emx-POMT2-Ctrl	Emx-POMT2
10	SO	JJ006	133.76073766666664	Emx-Cre+;POMT2F/F	Emx-POMT2-cKO	Emx-POMT2
10	SO	JJ007	0.06522866666667444	Emx-Cre+;POMT2F/F	Emx-POMT2-cKO	Emx-POMT2
10	SO	JJ008	53.288586	Emx-Cre+;POMT2F/F	Emx-POMT2-cKO	Emx-POMT2
10	SO	JJ029	-28.019743000000005	WT	B4GAT1-Ctrl	B4GAT1
10	SO	JJ030	-32.964811999999995	WT	B4GAT1-Ctrl	B4GAT1
10	SO	JJ031	-60.12541333333332	WT	B4GAT1-Ctrl	B4GAT1
10	SO	JJ032	-38.27062066666668	WT	B4GAT1-Ctrl	B4GAT1
10	SO	JJ033	-15.396774333333326	B4GAT1M155T/M155T	B4GAT1-Mutant	B4GAT1
10	SO	JJ034	-23.742977999999994	B4GAT1M155T/M155T	B4GAT1-Mutant	B4GAT1
10	SO	JJ035	36.89700133333332	B4GAT1M155T/M155T	B4GAT1-Mutant	B4GAT1
10	SO	JJ036	33.681843333333326	B4GAT1M155T/M155T	B4GAT1-Mutant	B4GAT1
10	SO	JJ061	-9.907428666666675	B4GAT1M155T/M155T	B4GAT1-Mutant	B4GAT1
10	SO	JJ062	-3.798012999999988	B4GAT1M155T/M155T	B4GAT1-Mutant	B4GAT1
10	SO	JJ063	-5.081159333333328	B4GAT1M155T/M155T	B4GAT1-Mutant	B4GAT1
10	SO	JJ064	8.307493666666678	B4GAT1M155T/M155T	B4GAT1-Mutant	B4GAT1
10	SO	JJ065	-14.287172000000007	B4GAT1M155T/M155T	B4GAT1-Mutant	B4GAT1
10	SO	JJ066	-22.27974233333332	B4GAT1M155T/M155T	B4GAT1-Mutant	B4GAT1
10	SO	JJ067	-22.87189866666667	B4GAT1M155T/M155T	B4GAT1-Mutant	B4GAT1
10	SO	JJ068	-40.01193466666667	B4GAT1M155T/M155T	B4GAT1-Mutant	B4GAT1
10	SO	JJ077	22.28387533333333	B4GAT1M155T/M155T	B4GAT1-Mutant	B4GAT1
10	SO	JJ078	-30.63946800000001	B4GAT1M155T/M155T	B4GAT1-Mutant	B4GAT1
10	SO	JJ079	-9.629131333333333	B4GAT1M155T/M155T	B4GAT1-Mutant	B4GAT1
10	SO	JJ080	26.399938333333324	B4GAT1M155T/M155T	B4GAT1-Mutant	B4GAT1
10	SO	JJ089	105.22030299999999	B4GAT1M155T/M155T	B4GAT1-Mutant	B4GAT1
10	SO	JJ090	-9.147007000000011	B4GAT1M155T/M155T	B4GAT1-Mutant	B4GAT1
10	SO	JJ091	-18.960567666666662	B4GAT1M155T/M155T	B4GAT1-Mutant	B4GAT1
10	SO	JJ092	-3.2753593333333413	B4GAT1M155T/M155T	B4GAT1-Mutant	B4GAT1
10	SO	JJ093	-0.7324703333333294	WT	B4GAT1-Ctrl	B4GAT1
10	SO	JJ094	-32.272823666666646	WT	B4GAT1-Ctrl	B4GAT1
10	SO	JJ095	-36.59395733333334	WT	B4GAT1-Ctrl	B4GAT1
10	SO	JJ096	-25.21593199999999	WT	B4GAT1-Ctrl	B4GAT1
10	SO	JJ101	1.6502930000000144	WT	B4GAT1-Ctrl	B4GAT1
10	SO	JJ102	-42.98213099999998	WT	B4GAT1-Ctrl	B4GAT1
10	SO	JJ103	85.55536366666666	WT	B4GAT1-Ctrl	B4GAT1
10	SO	JJ104	-23.579905999999983	WT	B4GAT1-Ctrl	B4GAT1
10	SO	JJ111	86.42761133333333	Emx-Cre+;DGF/-	Emx-DG-cKO	Emx-DG
10	SO	JJ112	49.54741733333333	Emx-Cre+;DGF/-	Emx-DG-cKO	Emx-DG
10	SO	JJ113	86.360269	Emx-Cre+;DGF/-	Emx-DG-cKO	Emx-DG
10	SO	JJ118	56.07024699999997	Emx-Cre+;DGF/-	Emx-DG-cKO	Emx-DG
10	SO	JJ119	36.68184500000001	Emx-Cre+;DGF/-	Emx-DG-cKO	Emx-DG
10	SO	JJ120	87.40749433333332	Emx-Cre+;DGF/-	Emx-DG-cKO	Emx-DG
10	SO	JJ121	10.857430000000003	Emx-Cre+;DGF/-	Emx-DG-cKO	Emx-DG
10	SO	JJ134	-2.3575963333333334	Emx-Cre+;DGF/+	Emx-DG-Ctrl	Emx-DG
10	SO	JJ135	-0.9333136666666633	Emx-Cre+;DGF/+	Emx-DG-Ctrl	Emx-DG
10	SO	JJ136	0.5831790000000012	Emx-Cre+;DGF/+	Emx-DG-Ctrl	Emx-DG
10	SO	JJ137	20.739234666666686	Emx-Cre+;DGF/+	Emx-DG-Ctrl	Emx-DG
10	SO	JJ150	73.73451566666667	Emx-Cre+;POMT2F/F	Emx-POMT2-cKO	Emx-POMT2
10	SO	JJ151	156.55703133333336	Emx-Cre+;POMT2F/F	Emx-POMT2-cKO	Emx-POMT2
10	SO	JJ152	173.72418666666664	Emx-Cre+;POMT2F/F	Emx-POMT2-cKO	Emx-POMT2
10	SO	JJ153	96.10390833333332	Emx-Cre+;POMT2F/F	Emx-POMT2-cKO	Emx-POMT2
10	SO	JJ154	-70.24865433333333	Emx-Cre+;POMT2F/+	Emx-POMT2-Ctrl	Emx-POMT2
10	SO	JJ155	-33.027336333333345	Emx-Cre+;POMT2F/+	Emx-POMT2-Ctrl	Emx-POMT2
10	SO	JJ156	-4.015566666666682	Emx-Cre+;POMT2F/+	Emx-POMT2-Ctrl	Emx-POMT2
10	SO	JJ157	5.215162666666667	Emx-Cre+;POMT2F/+	Emx-POMT2-Ctrl	Emx-POMT2
10	SO	JJ227	35.31791466666666	Emx-Cre+;POMT2F/F	Emx-POMT2-cKO	Emx-POMT2
10	SO	JJ228	50.28972000000001	Emx-Cre+;POMT2F/F	Emx-POMT2-cKO	Emx-POMT2
10	SO	JJ229	39.71164366666668	Emx-Cre+;POMT2F/F	Emx-POMT2-cKO	Emx-POMT2
10	SO	JJ230	7.49015133333334	Emx-Cre+;POMT2F/F	Emx-POMT2-cKO	Emx-POMT2
10	SO	JJ235	25.73159666666666	Emx-Cre+;POMT2F/+	Emx-POMT2-Ctrl	Emx-POMT2
10	SO	JJ236	22.13698766666667	Emx-Cre+;POMT2F/+	Emx-POMT2-Ctrl	Emx-POMT2
10	SO	JJ237	-10.923303333333337	Emx-Cre+;POMT2F/+	Emx-POMT2-Ctrl	Emx-POMT2
10	SO	JJ238	14.574120333333335	Emx-Cre+;POMT2F/+	Emx-POMT2-Ctrl	Emx-POMT2
10	SO	JJ243	16.55453499999997	Emx-Cre+;POMT2F/+	Emx-POMT2-Ctrl	Emx-POMT2
10	SO	JJ244	2.3174829999999815	Emx-Cre+;POMT2F/+	Emx-POMT2-Ctrl	Emx-POMT2
10	SO	JJ245	-18.021951333333323	Emx-Cre+;POMT2F/+	Emx-POMT2-Ctrl	Emx-POMT2
10	SO	JJ246	-13.584312333333344	Emx-Cre+;POMT2F/+	Emx-POMT2-Ctrl	Emx-POMT2
10	SO	JJ247	77.18778433333334	FKRPMut	FKRP-Mutant	FKRP
10	SO	JJ248	2.5255313333333334	FKRPMut	FKRP-Mutant	FKRP
10	SO	JJ249	-13.886618666666644	FKRPMut	FKRP-Mutant	FKRP
10	SO	JJ250	-15.935930333333337	FKRPMut	FKRP-Mutant	FKRP
10	SO	JJ251	22.377377000000006	WT	FKRP-Ctrl	FKRP
10	SO	JJ252	6.5204433333333425	WT	FKRP-Ctrl	FKRP
10	SO	JJ253	-22.081815333333328	WT	FKRP-Ctrl	FKRP
10	SO	JJ254	2.889656666666658	WT	FKRP-Ctrl	FKRP
10	SO	JJ255	-23.61404999999998	WT	FKRP-Ctrl	FKRP
10	SO	JJ256	31.086399333333343	WT	FKRP-Ctrl	FKRP
10	SO	JJ257	-22.859266666666695	WT	FKRP-Ctrl	FKRP
10	SO	JJ258	-1.9392053333333383	WT	FKRP-Ctrl	FKRP
10	SO	JJ259	9.974423333333334	FKRPMut	FKRP-Mutant	FKRP
10	SO	JJ260	15.49785033333336	FKRPMut	FKRP-Mutant	FKRP
10	SO	JJ261	-25.58703433333332	FKRPMut	FKRP-Mutant	FKRP
10	SO	JJ262	-14.76503866666666	FKRPMut	FKRP-Mutant	FKRP
10	SO	JJ263	23.11215066666665	WT	FKRP-Ctrl	FKRP
10	SO	JJ264	-25.93275833333333	WT	FKRP-Ctrl	FKRP
10	SO	JJ265	29.29501799999999	WT	FKRP-Ctrl	FKRP
10	SO	JJ266	-30.07618333333333	WT	FKRP-Ctrl	FKRP
10	SO	JJ299	10.029990666666682	DGdelta/-	ICD-Mutant	ICD
10	SO	JJ300	70.16679999999997	DGdelta/-	ICD-Mutant	ICD
10	SO	JJ301	14.48854533333334	DGdelta/-	ICD-Mutant	ICD
10	SO	JJ302	77.08362733333335	DGdelta/-	ICD-Mutant	ICD
10	SO	JJ307	22.56663766666668	WT	ICD-Ctrl	ICD
10	SO	JJ308	-8.177635666666674	WT	ICD-Ctrl	ICD
10	SO	JJ309	-5.507116333333329	WT	ICD-Ctrl	ICD
10	SO	JJ310	10.87839333333333	WT	ICD-Ctrl	ICD
10	SO	JJ331	44.302785333333325	DGdelta/-	ICD-Mutant	ICD
10	SO	JJ332	32.96085633333333	DGdelta/-	ICD-Mutant	ICD
10	SO	JJ333	-21.88352066666664	DGdelta/-	ICD-Mutant	ICD
10	SO	JJ334	-11.691458666666657	DGdelta/-	ICD-Mutant	ICD
10	SO	JJ339	-9.813693666666646	DGdelta/-	ICD-Mutant	ICD
10	SO	JJ340	19.876793333333353	DGdelta/-	ICD-Mutant	ICD
10	SO	JJ341	-2.7874643333333133	DGdelta/-	ICD-Mutant	ICD
10	SO	JJ342	18.556823333333323	DGdelta/-	ICD-Mutant	ICD
10	SO	JJ347	12.825116333333332	WT	ICD-Ctrl	ICD
10	SO	JJ348	-0.8439573333333404	WT	ICD-Ctrl	ICD
10	SO	JJ349	-11.240970000000004	WT	ICD-Ctrl	ICD
10	SO	JJ350	-29.42793333333334	WT	ICD-Ctrl	ICD
10	SO	JJ355	14.175782666666672	WT	ICD-Ctrl	ICD
10	SO	JJ356	-26.881686666666656	WT	ICD-Ctrl	ICD
10	SO	JJ357	-15.83813999999999	WT	ICD-Ctrl	ICD
10	SO	JJ358	-22.197674000000017	WT	ICD-Ctrl	ICD
10	SO	JJ362	7.979776333333329	FKRPMut	FKRP-Mutant	FKRP
10	SO	JJ363	11.43634099999997	FKRPMut	FKRP-Mutant	FKRP
10	SO	JJ364	29.43209066666668	FKRPMut	FKRP-Mutant	FKRP
10	SO	JJ365	4.704305333333328	FKRPMut	FKRP-Mutant	FKRP
10	SO	JJ369	13.937652999999992	WT	FKRP-Ctrl	FKRP
10	SO	JJ370	-37.10468066666664	WT	FKRP-Ctrl	FKRP
10	SO	JJ371	-24.38175266666668	WT	FKRP-Ctrl	FKRP
10	SO	JJ372	-31.326541666666657	WT	FKRP-Ctrl	FKRP
10	SO	JJ373	49.749352666666674	Emx-Cre+;DGF/-	Emx-DG-cKO	Emx-DG
10	SO	JJ374	25.729673666666674	Emx-Cre+;DGF/-	Emx-DG-cKO	Emx-DG
10	SO	JJ375	107.93509533333334	Emx-Cre+;DGF/-	Emx-DG-cKO	Emx-DG
10	SO	JJ376	-11.519009000000011	Emx-Cre+;DGF/-	Emx-DG-cKO	Emx-DG
10	SO	JJ377	50.706557	Emx-Cre+;DGF/-	Emx-DG-cKO	Emx-DG
10	SO	JJ378	65.27253066666664	Emx-Cre+;DGF/-	Emx-DG-cKO	Emx-DG
10	SO	JJ379	48.072906666666675	Emx-Cre+;DGF/-	Emx-DG-cKO	Emx-DG
10	SO	JJ380	23.643191333333334	Emx-Cre+;DGF/-	Emx-DG-cKO	Emx-DG
10	SO	JJ381	-5.497601666666678	Emx-Cre+;DGF/+	Emx-DG-Ctrl	Emx-DG
10	SO	JJ382	10.038000000000002	Emx-Cre+;DGF/+	Emx-DG-Ctrl	Emx-DG
10	SO	JJ384	-16.701406333333313	Emx-Cre+;DGF/+	Emx-DG-Ctrl	Emx-DG
10	SO	JJ385	-25.91804400000001	Emx-Cre+;DGF/-	Emx-DG-cKO	Emx-DG
10	SO	JJ386	-19.68069949999999	Emx-Cre+;DGF/-	Emx-DG-cKO	Emx-DG
10	SO	JJ387	33.15564400000001	Emx-Cre+;DGF/-	Emx-DG-cKO	Emx-DG
10	SO	JJ388	34.93552849999999	Emx-Cre+;DGF/+	Emx-DG-Ctrl	Emx-DG
10	SO	JJ388	34.93552849999999	Emx-Cre+;DGF/+	Emx-DG-Ctrl	Emx-DG
10	SO	JJ389	94.86954666666664	Emx-Cre+;DGF/+	Emx-DG-Ctrl	Emx-DG
10	SO	JJ390	19.634779666666663	Emx-Cre+;DGF/+	Emx-DG-Ctrl	Emx-DG
10	SO	JJ391	28.17469600000001	Emx-Cre+;DGF/+	Emx-DG-Ctrl	Emx-DG
10	SO	JJ392	1.046501999999985	Emx-Cre+;DGF/+	Emx-DG-Ctrl	Emx-DG
11	SO	JJ001	-34.497178999999996	Emx-Cre+;POMT2F/+	Emx-POMT2-Ctrl	Emx-POMT2
11	SO	JJ002	75.61390433333332	Emx-Cre+;POMT2F/F	Emx-POMT2-cKO	Emx-POMT2
11	SO	JJ003	-12.793935999999993	Emx-Cre+;POMT2F/+	Emx-POMT2-Ctrl	Emx-POMT2
11	SO	JJ004	7.754732	Emx-Cre+;POMT2F/+	Emx-POMT2-Ctrl	Emx-POMT2
11	SO	JJ005	-32.471982000000004	Emx-Cre+;POMT2F/+	Emx-POMT2-Ctrl	Emx-POMT2
11	SO	JJ006	96.30923766666668	Emx-Cre+;POMT2F/F	Emx-POMT2-cKO	Emx-POMT2
11	SO	JJ007	-13.728154666666645	Emx-Cre+;POMT2F/F	Emx-POMT2-cKO	Emx-POMT2
11	SO	JJ008	50.541686	Emx-Cre+;POMT2F/F	Emx-POMT2-cKO	Emx-POMT2
11	SO	JJ029	-27.621209666666676	WT	B4GAT1-Ctrl	B4GAT1
11	SO	JJ030	-23.785228666666654	WT	B4GAT1-Ctrl	B4GAT1
11	SO	JJ031	-34.51653000000001	WT	B4GAT1-Ctrl	B4GAT1
11	SO	JJ032	-35.37765400000001	WT	B4GAT1-Ctrl	B4GAT1
11	SO	JJ033	-22.678224333333333	B4GAT1M155T/M155T	B4GAT1-Mutant	B4GAT1
11	SO	JJ034	-3.8443779999999967	B4GAT1M155T/M155T	B4GAT1-Mutant	B4GAT1
11	SO	JJ035	26.281784666666642	B4GAT1M155T/M155T	B4GAT1-Mutant	B4GAT1
11	SO	JJ036	36.30892666666667	B4GAT1M155T/M155T	B4GAT1-Mutant	B4GAT1
11	SO	JJ061	-7.272428666666674	B4GAT1M155T/M155T	B4GAT1-Mutant	B4GAT1
11	SO	JJ062	-14.356879666666657	B4GAT1M155T/M155T	B4GAT1-Mutant	B4GAT1
11	SO	JJ063	3.994607333333344	B4GAT1M155T/M155T	B4GAT1-Mutant	B4GAT1
11	SO	JJ064	27.286377000000005	B4GAT1M155T/M155T	B4GAT1-Mutant	B4GAT1
11	SO	JJ065	-18.51727199999999	B4GAT1M155T/M155T	B4GAT1-Mutant	B4GAT1
11	SO	JJ066	9.847957666666664	B4GAT1M155T/M155T	B4GAT1-Mutant	B4GAT1
11	SO	JJ067	-25.240748666666672	B4GAT1M155T/M155T	B4GAT1-Mutant	B4GAT1
11	SO	JJ068	-28.333818000000008	B4GAT1M155T/M155T	B4GAT1-Mutant	B4GAT1
11	SO	JJ077	5.665242000000002	B4GAT1M155T/M155T	B4GAT1-Mutant	B4GAT1
11	SO	JJ078	-14.66773466666668	B4GAT1M155T/M155T	B4GAT1-Mutant	B4GAT1
11	SO	JJ079	7.257635333333336	B4GAT1M155T/M155T	B4GAT1-Mutant	B4GAT1
11	SO	JJ080	58.76513833333333	B4GAT1M155T/M155T	B4GAT1-Mutant	B4GAT1
11	SO	JJ089	123.02756966666665	B4GAT1M155T/M155T	B4GAT1-Mutant	B4GAT1
11	SO	JJ090	7.8500596666666524	B4GAT1M155T/M155T	B4GAT1-Mutant	B4GAT1
11	SO	JJ091	-15.993717666666669	B4GAT1M155T/M155T	B4GAT1-Mutant	B4GAT1
11	SO	JJ092	25.823307333333332	B4GAT1M155T/M155T	B4GAT1-Mutant	B4GAT1
11	SO	JJ093	2.4679963333333226	WT	B4GAT1-Ctrl	B4GAT1
11	SO	JJ094	-37.979740333333325	WT	B4GAT1-Ctrl	B4GAT1
11	SO	JJ095	-39.06209066666668	WT	B4GAT1-Ctrl	B4GAT1
11	SO	JJ096	-23.293565333333333	WT	B4GAT1-Ctrl	B4GAT1
11	SO	JJ101	-37.18172366666666	WT	B4GAT1-Ctrl	B4GAT1
11	SO	JJ102	-42.34489766666665	WT	B4GAT1-Ctrl	B4GAT1
11	SO	JJ103	114.52188033333336	WT	B4GAT1-Ctrl	B4GAT1
11	SO	JJ104	-29.775306	WT	B4GAT1-Ctrl	B4GAT1
11	SO	JJ111	95.17746133333331	Emx-Cre+;DGF/-	Emx-DG-cKO	Emx-DG
11	SO	JJ112	56.67263399999998	Emx-Cre+;DGF/-	Emx-DG-cKO	Emx-DG
11	SO	JJ113	77.47005233333334	Emx-Cre+;DGF/-	Emx-DG-cKO	Emx-DG
11	SO	JJ118	64.79031366666665	Emx-Cre+;DGF/-	Emx-DG-cKO	Emx-DG
11	SO	JJ119	49.695061666666675	Emx-Cre+;DGF/-	Emx-DG-cKO	Emx-DG
11	SO	JJ120	70.19032766666665	Emx-Cre+;DGF/-	Emx-DG-cKO	Emx-DG
11	SO	JJ121	27.997163333333315	Emx-Cre+;DGF/-	Emx-DG-cKO	Emx-DG
11	SO	JJ134	1.5502536666666817	Emx-Cre+;DGF/+	Emx-DG-Ctrl	Emx-DG
11	SO	JJ135	14.389636333333348	Emx-Cre+;DGF/+	Emx-DG-Ctrl	Emx-DG
11	SO	JJ136	-12.331204333333337	Emx-Cre+;DGF/+	Emx-DG-Ctrl	Emx-DG
11	SO	JJ137	19.13945133333333	Emx-Cre+;DGF/+	Emx-DG-Ctrl	Emx-DG
11	SO	JJ150	67.75508233333335	Emx-Cre+;POMT2F/F	Emx-POMT2-cKO	Emx-POMT2
11	SO	JJ151	106.41466466666667	Emx-Cre+;POMT2F/F	Emx-POMT2-cKO	Emx-POMT2
11	SO	JJ152	195.69997	Emx-Cre+;POMT2F/F	Emx-POMT2-cKO	Emx-POMT2
11	SO	JJ153	100.31807500000001	Emx-Cre+;POMT2F/F	Emx-POMT2-cKO	Emx-POMT2
11	SO	JJ154	-71.984921	Emx-Cre+;POMT2F/+	Emx-POMT2-Ctrl	Emx-POMT2
11	SO	JJ155	8.864980333333355	Emx-Cre+;POMT2F/+	Emx-POMT2-Ctrl	Emx-POMT2
11	SO	JJ156	-16.93885000000002	Emx-Cre+;POMT2F/+	Emx-POMT2-Ctrl	Emx-POMT2
11	SO	JJ157	26.520695999999987	Emx-Cre+;POMT2F/+	Emx-POMT2-Ctrl	Emx-POMT2
11	SO	JJ227	24.437181333333324	Emx-Cre+;POMT2F/F	Emx-POMT2-cKO	Emx-POMT2
11	SO	JJ228	79.57973666666665	Emx-Cre+;POMT2F/F	Emx-POMT2-cKO	Emx-POMT2
11	SO	JJ229	51.82661033333334	Emx-Cre+;POMT2F/F	Emx-POMT2-cKO	Emx-POMT2
11	SO	JJ230	20.904517999999996	Emx-Cre+;POMT2F/F	Emx-POMT2-cKO	Emx-POMT2
11	SO	JJ235	16.833679999999998	Emx-Cre+;POMT2F/+	Emx-POMT2-Ctrl	Emx-POMT2
11	SO	JJ236	31.58885433333333	Emx-Cre+;POMT2F/+	Emx-POMT2-Ctrl	Emx-POMT2
11	SO	JJ237	-19.536320000000018	Emx-Cre+;POMT2F/+	Emx-POMT2-Ctrl	Emx-POMT2
11	SO	JJ238	11.721270333333328	Emx-Cre+;POMT2F/+	Emx-POMT2-Ctrl	Emx-POMT2
11	SO	JJ243	-0.1557983333333368	Emx-Cre+;POMT2F/+	Emx-POMT2-Ctrl	Emx-POMT2
11	SO	JJ244	1.380183000000007	Emx-Cre+;POMT2F/+	Emx-POMT2-Ctrl	Emx-POMT2
11	SO	JJ245	-1.9552679999999991	Emx-Cre+;POMT2F/+	Emx-POMT2-Ctrl	Emx-POMT2
11	SO	JJ246	-8.976995666666673	Emx-Cre+;POMT2F/+	Emx-POMT2-Ctrl	Emx-POMT2
11	SO	JJ247	62.92671766666666	FKRPMut	FKRP-Mutant	FKRP
11	SO	JJ248	-13.072068666666667	FKRPMut	FKRP-Mutant	FKRP
11	SO	JJ249	-23.933785333333333	FKRPMut	FKRP-Mutant	FKRP
11	SO	JJ250	-14.980847000000002	FKRPMut	FKRP-Mutant	FKRP
11	SO	JJ251	31.85971033333334	WT	FKRP-Ctrl	FKRP
11	SO	JJ252	13.736309999999994	WT	FKRP-Ctrl	FKRP
11	SO	JJ253	-17.58506533333333	WT	FKRP-Ctrl	FKRP
11	SO	JJ254	-5.678393333333351	WT	FKRP-Ctrl	FKRP
11	SO	JJ255	-4.253216666666655	WT	FKRP-Ctrl	FKRP
11	SO	JJ256	12.873182666666679	WT	FKRP-Ctrl	FKRP
11	SO	JJ257	6.9904999999999875	WT	FKRP-Ctrl	FKRP
11	SO	JJ258	-6.7142886666666755	WT	FKRP-Ctrl	FKRP
11	SO	JJ259	-2.6668933333333484	FKRPMut	FKRP-Mutant	FKRP
11	SO	JJ260	0.7639003333333297	FKRPMut	FKRP-Mutant	FKRP
11	SO	JJ261	-9.040734333333328	FKRPMut	FKRP-Mutant	FKRP
11	SO	JJ262	-16.40565533333334	FKRPMut	FKRP-Mutant	FKRP
11	SO	JJ263	27.518283999999976	WT	FKRP-Ctrl	FKRP
11	SO	JJ264	-23.75517499999999	WT	FKRP-Ctrl	FKRP
11	SO	JJ265	16.351268000000005	WT	FKRP-Ctrl	FKRP
11	SO	JJ266	-24.17846666666666	WT	FKRP-Ctrl	FKRP
11	SO	JJ299	23.532290666666654	DGdelta/-	ICD-Mutant	ICD
11	SO	JJ300	41.12573333333332	DGdelta/-	ICD-Mutant	ICD
11	SO	JJ301	-18.321904666666665	DGdelta/-	ICD-Mutant	ICD
11	SO	JJ302	41.082443999999974	DGdelta/-	ICD-Mutant	ICD
11	SO	JJ307	34.42487100000002	WT	ICD-Ctrl	ICD
11	SO	JJ308	8.44866433333334	WT	ICD-Ctrl	ICD
11	SO	JJ309	0.8921336666666662	WT	ICD-Ctrl	ICD
11	SO	JJ310	17.926660000000027	WT	ICD-Ctrl	ICD
11	SO	JJ331	9.194368666666662	DGdelta/-	ICD-Mutant	ICD
11	SO	JJ332	2.021172999999976	DGdelta/-	ICD-Mutant	ICD
11	SO	JJ333	-10.081803999999977	DGdelta/-	ICD-Mutant	ICD
11	SO	JJ334	-31.125741999999985	DGdelta/-	ICD-Mutant	ICD
11	SO	JJ339	-5.537627000000005	DGdelta/-	ICD-Mutant	ICD
11	SO	JJ340	-15.916623333333328	DGdelta/-	ICD-Mutant	ICD
11	SO	JJ341	4.388719000000019	DGdelta/-	ICD-Mutant	ICD
11	SO	JJ342	18.657406666666663	DGdelta/-	ICD-Mutant	ICD
11	SO	JJ347	10.337649666666664	WT	ICD-Ctrl	ICD
11	SO	JJ348	13.21949266666663	WT	ICD-Ctrl	ICD
11	SO	JJ349	-4.321103333333336	WT	ICD-Ctrl	ICD
11	SO	JJ350	-17.4894	WT	ICD-Ctrl	ICD
11	SO	JJ355	1.4890160000000112	WT	ICD-Ctrl	ICD
11	SO	JJ356	-18.993369999999988	WT	ICD-Ctrl	ICD
11	SO	JJ357	-7.76194	WT	ICD-Ctrl	ICD
11	SO	JJ358	-16.079824000000002	WT	ICD-Ctrl	ICD
11	SO	JJ362	20.703126333333348	FKRPMut	FKRP-Mutant	FKRP
11	SO	JJ363	18.353390999999988	FKRPMut	FKRP-Mutant	FKRP
11	SO	JJ364	28.349990666666695	FKRPMut	FKRP-Mutant	FKRP
11	SO	JJ365	7.774655333333338	FKRPMut	FKRP-Mutant	FKRP
11	SO	JJ369	9.5326196666666565	WT	FKRP-Ctrl	FKRP
11	SO	JJ370	-20.322980666666638	WT	FKRP-Ctrl	FKRP
11	SO	JJ371	-20.396002666666686	WT	FKRP-Ctrl	FKRP
11	SO	JJ372	-5.664941666666645	WT	FKRP-Ctrl	FKRP
11	SO	JJ373	79.095486	Emx-Cre+;DGF/-	Emx-DG-cKO	Emx-DG
11	SO	JJ374	31.316473666666678	Emx-Cre+;DGF/-	Emx-DG-cKO	Emx-DG
11	SO	JJ375	96.06091200000002	Emx-Cre+;DGF/-	Emx-DG-cKO	Emx-DG
11	SO	JJ376	-19.362092333333322	Emx-Cre+;DGF/-	Emx-DG-cKO	Emx-DG
11	SO	JJ377	68.51045699999997	Emx-Cre+;DGF/-	Emx-DG-cKO	Emx-DG
11	SO	JJ378	72.24676399999998	Emx-Cre+;DGF/-	Emx-DG-cKO	Emx-DG
11	SO	JJ379	61.44854	Emx-Cre+;DGF/-	Emx-DG-cKO	Emx-DG
11	SO	JJ380	35.789774666666666	Emx-Cre+;DGF/-	Emx-DG-cKO	Emx-DG
11	SO	JJ381	-11.314735000000013	Emx-Cre+;DGF/+	Emx-DG-Ctrl	Emx-DG
11	SO	JJ382	-1.7873166666666596	Emx-Cre+;DGF/+	Emx-DG-Ctrl	Emx-DG
11	SO	JJ384	-29.32387299999998	Emx-Cre+;DGF/+	Emx-DG-Ctrl	Emx-DG
11	SO	JJ385	-19.36784399999999	Emx-Cre+;DGF/-	Emx-DG-cKO	Emx-DG
11	SO	JJ386	-19.612324499999986	Emx-Cre+;DGF/-	Emx-DG-cKO	Emx-DG
11	SO	JJ387	46.59056899999999	Emx-Cre+;DGF/-	Emx-DG-cKO	Emx-DG
11	SO	JJ388	31.817561833333343	Emx-Cre+;DGF/+	Emx-DG-Ctrl	Emx-DG
11	SO	JJ388	31.817561833333343	Emx-Cre+;DGF/+	Emx-DG-Ctrl	Emx-DG
11	SO	JJ389	95.03031333333332	Emx-Cre+;DGF/+	Emx-DG-Ctrl	Emx-DG
11	SO	JJ390	25.679829666666667	Emx-Cre+;DGF/+	Emx-DG-Ctrl	Emx-DG
11	SO	JJ391	23.93512933333334	Emx-Cre+;DGF/+	Emx-DG-Ctrl	Emx-DG
11	SO	JJ392	8.17435199999999	Emx-Cre+;DGF/+	Emx-DG-Ctrl	Emx-DG
12	SO	JJ001	-31.696928999999997	Emx-Cre+;POMT2F/+	Emx-POMT2-Ctrl	Emx-POMT2
12	SO	JJ002	80.29615433333332	Emx-Cre+;POMT2F/F	Emx-POMT2-cKO	Emx-POMT2
12	SO	JJ003	2.1667306666666852	Emx-Cre+;POMT2F/+	Emx-POMT2-Ctrl	Emx-POMT2
12	SO	JJ004	-2.309184666666662	Emx-Cre+;POMT2F/+	Emx-POMT2-Ctrl	Emx-POMT2
12	SO	JJ005	-27.845981999999992	Emx-Cre+;POMT2F/+	Emx-POMT2-Ctrl	Emx-POMT2
12	SO	JJ006	99.24815433333333	Emx-Cre+;POMT2F/F	Emx-POMT2-cKO	Emx-POMT2
12	SO	JJ007	-7.7927379999999955	Emx-Cre+;POMT2F/F	Emx-POMT2-cKO	Emx-POMT2
12	SO	JJ008	59.72560266666667	Emx-Cre+;POMT2F/F	Emx-POMT2-cKO	Emx-POMT2
12	SO	JJ029	-37.995459666666676	WT	B4GAT1-Ctrl	B4GAT1
12	SO	JJ030	-34.231562	WT	B4GAT1-Ctrl	B4GAT1
12	SO	JJ031	-40.231030000000004	WT	B4GAT1-Ctrl	B4GAT1
12	SO	JJ032	-43.302237333333345	WT	B4GAT1-Ctrl	B4GAT1
12	SO	JJ033	-15.51780766666667	B4GAT1M155T/M155T	B4GAT1-Mutant	B4GAT1
12	SO	JJ034	9.72053866666667	B4GAT1M155T/M155T	B4GAT1-Mutant	B4GAT1
12	SO	JJ035	31.205201333333303	B4GAT1M155T/M155T	B4GAT1-Mutant	B4GAT1
12	SO	JJ036	8.712176666666664	B4GAT1M155T/M155T	B4GAT1-Mutant	B4GAT1
12	SO	JJ061	-13.583178666666669	B4GAT1M155T/M155T	B4GAT1-Mutant	B4GAT1
12	SO	JJ062	-17.637796333333323	B4GAT1M155T/M155T	B4GAT1-Mutant	B4GAT1
12	SO	JJ063	-0.3033926666666484	B4GAT1M155T/M155T	B4GAT1-Mutant	B4GAT1
12	SO	JJ064	41.874210333333345	B4GAT1M155T/M155T	B4GAT1-Mutant	B4GAT1
12	SO	JJ065	-3.787772000000009	B4GAT1M155T/M155T	B4GAT1-Mutant	B4GAT1
12	SO	JJ066	-2.2367923333333315	B4GAT1M155T/M155T	B4GAT1-Mutant	B4GAT1
12	SO	JJ067	-7.052165333333335	B4GAT1M155T/M155T	B4GAT1-Mutant	B4GAT1
12	SO	JJ068	-31.585568000000013	B4GAT1M155T/M155T	B4GAT1-Mutant	B4GAT1
12	SO	JJ077	-2.6793413333333405	B4GAT1M155T/M155T	B4GAT1-Mutant	B4GAT1
12	SO	JJ078	17.641682000000003	B4GAT1M155T/M155T	B4GAT1-Mutant	B4GAT1
12	SO	JJ079	-7.187447999999999	B4GAT1M155T/M155T	B4GAT1-Mutant	B4GAT1
12	SO	JJ080	55.250221666666675	B4GAT1M155T/M155T	B4GAT1-Mutant	B4GAT1
12	SO	JJ089	155.40806966666668	B4GAT1M155T/M155T	B4GAT1-Mutant	B4GAT1
12	SO	JJ090	-7.72452366666667	B4GAT1M155T/M155T	B4GAT1-Mutant	B4GAT1
12	SO	JJ091	-12.419467666666662	B4GAT1M155T/M155T	B4GAT1-Mutant	B4GAT1
12	SO	JJ092	9.330973999999998	B4GAT1M155T/M155T	B4GAT1-Mutant	B4GAT1
12	SO	JJ093	20.800663000000004	WT	B4GAT1-Ctrl	B4GAT1
12	SO	JJ094	-51.69332366666665	WT	B4GAT1-Ctrl	B4GAT1
12	SO	JJ095	-40.796173999999986	WT	B4GAT1-Ctrl	B4GAT1
12	SO	JJ096	-27.391315333333335	WT	B4GAT1-Ctrl	B4GAT1
12	SO	JJ101	-34.54522366666665	WT	B4GAT1-Ctrl	B4GAT1
12	SO	JJ102	-13.837730999999962	WT	B4GAT1-Ctrl	B4GAT1
12	SO	JJ103	115.69654700000005	WT	B4GAT1-Ctrl	B4GAT1
12	SO	JJ104	-18.911222666666664	WT	B4GAT1-Ctrl	B4GAT1
12	SO	JJ111	115.82412799999999	Emx-Cre+;DGF/-	Emx-DG-cKO	Emx-DG
12	SO	JJ112	42.65030066666666	Emx-Cre+;DGF/-	Emx-DG-cKO	Emx-DG
12	SO	JJ113	65.34413566666669	Emx-Cre+;DGF/-	Emx-DG-cKO	Emx-DG
12	SO	JJ118	80.94889699999997	Emx-Cre+;DGF/-	Emx-DG-cKO	Emx-DG
12	SO	JJ119	59.116895	Emx-Cre+;DGF/-	Emx-DG-cKO	Emx-DG
12	SO	JJ120	24.638660999999995	Emx-Cre+;DGF/-	Emx-DG-cKO	Emx-DG
12	SO	JJ121	25.35874666666666	Emx-Cre+;DGF/-	Emx-DG-cKO	Emx-DG
12	SO	JJ134	3.0543369999999945	Emx-Cre+;DGF/+	Emx-DG-Ctrl	Emx-DG
12	SO	JJ135	10.218636333333336	Emx-Cre+;DGF/+	Emx-DG-Ctrl	Emx-DG
12	SO	JJ136	-15.700537666666662	Emx-Cre+;DGF/+	Emx-DG-Ctrl	Emx-DG
12	SO	JJ137	26.800034666666676	Emx-Cre+;DGF/+	Emx-DG-Ctrl	Emx-DG
12	SO	JJ150	55.893082333333346	Emx-Cre+;POMT2F/F	Emx-POMT2-cKO	Emx-POMT2
12	SO	JJ151	91.79683133333334	Emx-Cre+;POMT2F/F	Emx-POMT2-cKO	Emx-POMT2
12	SO	JJ152	148.16796999999997	Emx-Cre+;POMT2F/F	Emx-POMT2-cKO	Emx-POMT2
12	SO	JJ153	114.590075	Emx-Cre+;POMT2F/F	Emx-POMT2-cKO	Emx-POMT2
12	SO	JJ154	-45.515421	Emx-Cre+;POMT2F/+	Emx-POMT2-Ctrl	Emx-POMT2
12	SO	JJ155	-6.981602999999988	Emx-Cre+;POMT2F/+	Emx-POMT2-Ctrl	Emx-POMT2
12	SO	JJ156	-20.701183333333347	Emx-Cre+;POMT2F/+	Emx-POMT2-Ctrl	Emx-POMT2
12	SO	JJ157	0.05694599999998218	Emx-Cre+;POMT2F/+	Emx-POMT2-Ctrl	Emx-POMT2
12	SO	JJ227	38.153264666666665	Emx-Cre+;POMT2F/F	Emx-POMT2-cKO	Emx-POMT2
12	SO	JJ228	70.07173666666665	Emx-Cre+;POMT2F/F	Emx-POMT2-cKO	Emx-POMT2
12	SO	JJ229	64.36061033333334	Emx-Cre+;POMT2F/F	Emx-POMT2-cKO	Emx-POMT2
12	SO	JJ230	34.78360133333333	Emx-Cre+;POMT2F/F	Emx-POMT2-cKO	Emx-POMT2
12	SO	JJ235	12.556763333333322	Emx-Cre+;POMT2F/+	Emx-POMT2-Ctrl	Emx-POMT2
12	SO	JJ236	-4.36056233333333	Emx-Cre+;POMT2F/+	Emx-POMT2-Ctrl	Emx-POMT2
12	SO	JJ237	-14.551153333333332	Emx-Cre+;POMT2F/+	Emx-POMT2-Ctrl	Emx-POMT2
12	SO	JJ238	21.809687000000014	Emx-Cre+;POMT2F/+	Emx-POMT2-Ctrl	Emx-POMT2
12	SO	JJ243	9.788368333333333	Emx-Cre+;POMT2F/+	Emx-POMT2-Ctrl	Emx-POMT2
12	SO	JJ244	-8.67815033333333	Emx-Cre+;POMT2F/+	Emx-POMT2-Ctrl	Emx-POMT2
12	SO	JJ245	-6.6568513333333215	Emx-Cre+;POMT2F/+	Emx-POMT2-Ctrl	Emx-POMT2
12	SO	JJ246	-21.243912333333338	Emx-Cre+;POMT2F/+	Emx-POMT2-Ctrl	Emx-POMT2
12	SO	JJ247	82.35738433333334	FKRPMut	FKRP-Mutant	FKRP
12	SO	JJ248	-15.30231866666667	FKRPMut	FKRP-Mutant	FKRP
12	SO	JJ249	-21.670785333333317	FKRPMut	FKRP-Mutant	FKRP
12	SO	JJ250	-14.77851366666666	FKRPMut	FKRP-Mutant	FKRP
12	SO	JJ251	35.29487700000001	WT	FKRP-Ctrl	FKRP
12	SO	JJ252	17.822226666666666	WT	FKRP-Ctrl	FKRP
12	SO	JJ253	4.777518000000015	WT	FKRP-Ctrl	FKRP
12	SO	JJ254	-4.729560000000011	WT	FKRP-Ctrl	FKRP
12	SO	JJ255	-9.681216666666671	WT	FKRP-Ctrl	FKRP
12	SO	JJ256	34.478016000000004	WT	FKRP-Ctrl	FKRP
12	SO	JJ257	27.008916666666646	WT	FKRP-Ctrl	FKRP
12	SO	JJ258	-1.9328719999999937	WT	FKRP-Ctrl	FKRP
12	SO	JJ259	7.636106666666649	FKRPMut	FKRP-Mutant	FKRP
12	SO	JJ260	-8.597849666666642	FKRPMut	FKRP-Mutant	FKRP
12	SO	JJ261	-7.150900999999986	FKRPMut	FKRP-Mutant	FKRP
12	SO	JJ262	-23.478572000000003	FKRPMut	FKRP-Mutant	FKRP
12	SO	JJ263	28.445200666666647	WT	FKRP-Ctrl	FKRP
12	SO	JJ264	-24.720175	WT	FKRP-Ctrl	FKRP
12	SO	JJ265	39.39376799999999	WT	FKRP-Ctrl	FKRP
12	SO	JJ266	2.059033333333351	WT	FKRP-Ctrl	FKRP
12	SO	JJ299	75.82204066666667	DGdelta/-	ICD-Mutant	ICD
12	SO	JJ300	39.566233333333344	DGdelta/-	ICD-Mutant	ICD
12	SO	JJ301	-23.688488000000007	DGdelta/-	ICD-Mutant	ICD
12	SO	JJ302	55.38902733333331	DGdelta/-	ICD-Mutant	ICD
12	SO	JJ307	33.621704333333355	WT	ICD-Ctrl	ICD
12	SO	JJ308	-8.343502333333353	WT	ICD-Ctrl	ICD
12	SO	JJ309	-26.85869966666665	WT	ICD-Ctrl	ICD
12	SO	JJ310	51.475243333333346	WT	ICD-Ctrl	ICD
12	SO	JJ331	42.158618666666634	DGdelta/-	ICD-Mutant	ICD
12	SO	JJ332	37.47958966666666	DGdelta/-	ICD-Mutant	ICD
12	SO	JJ333	-1.5307206666666577	DGdelta/-	ICD-Mutant	ICD
12	SO	JJ334	-11.526408666666649	DGdelta/-	ICD-Mutant	ICD
12	SO	JJ339	1.2680396666666713	DGdelta/-	ICD-Mutant	ICD
12	SO	JJ340	-5.402540000000006	DGdelta/-	ICD-Mutant	ICD
12	SO	JJ341	-28.306780999999983	DGdelta/-	ICD-Mutant	ICD
12	SO	JJ342	59.97648999999999	DGdelta/-	ICD-Mutant	ICD
12	SO	JJ347	2.4223996666666685	WT	ICD-Ctrl	ICD
12	SO	JJ348	30.896742666666643	WT	ICD-Ctrl	ICD
12	SO	JJ349	3.601646666666653	WT	ICD-Ctrl	ICD
12	SO	JJ350	-0.8524833333333296	WT	ICD-Ctrl	ICD
12	SO	JJ355	5.936766000000006	WT	ICD-Ctrl	ICD
12	SO	JJ356	-11.121453333333326	WT	ICD-Ctrl	ICD
12	SO	JJ357	-6.171273333333318	WT	ICD-Ctrl	ICD
12	SO	JJ358	-5.136740666666668	WT	ICD-Ctrl	ICD
12	SO	JJ362	24.792709666666667	FKRPMut	FKRP-Mutant	FKRP
12	SO	JJ363	8.30105766666666	FKRPMut	FKRP-Mutant	FKRP
12	SO	JJ364	23.554990666666697	FKRPMut	FKRP-Mutant	FKRP
12	SO	JJ365	-0.011427999999995109	FKRPMut	FKRP-Mutant	FKRP
12	SO	JJ369	39.79253633333334	WT	FKRP-Ctrl	FKRP
12	SO	JJ370	-19.438313999999973	WT	FKRP-Ctrl	FKRP
12	SO	JJ371	-21.18025266666666	WT	FKRP-Ctrl	FKRP
12	SO	JJ372	17.55489166666668	WT	FKRP-Ctrl	FKRP
12	SO	JJ373	55.55456933333331	Emx-Cre+;DGF/-	Emx-DG-cKO	Emx-DG
12	SO	JJ374	64.95080700000001	Emx-Cre+;DGF/-	Emx-DG-cKO	Emx-DG
12	SO	JJ375	79.13482866666668	Emx-Cre+;DGF/-	Emx-DG-cKO	Emx-DG
12	SO	JJ376	-15.53484233333333	Emx-Cre+;DGF/-	Emx-DG-cKO	Emx-DG
12	SO	JJ377	55.532123666666656	Emx-Cre+;DGF/-	Emx-DG-cKO	Emx-DG
12	SO	JJ378	122.33651400000001	Emx-Cre+;DGF/-	Emx-DG-cKO	Emx-DG
12	SO	JJ379	73.8774566666667	Emx-Cre+;DGF/-	Emx-DG-cKO	Emx-DG
12	SO	JJ380	16.62952466666667	Emx-Cre+;DGF/-	Emx-DG-cKO	Emx-DG
12	SO	JJ381	-15.600735000000014	Emx-Cre+;DGF/+	Emx-DG-Ctrl	Emx-DG
12	SO	JJ382	-13.06073333333334	Emx-Cre+;DGF/+	Emx-DG-Ctrl	Emx-DG
12	SO	JJ384	-35.91387299999999	Emx-Cre+;DGF/+	Emx-DG-Ctrl	Emx-DG
12	SO	JJ385	-5.716594000000015	Emx-Cre+;DGF/-	Emx-DG-cKO	Emx-DG
12	SO	JJ386	-18.909574499999998	Emx-Cre+;DGF/-	Emx-DG-cKO	Emx-DG
12	SO	JJ387	45.917444	Emx-Cre+;DGF/-	Emx-DG-cKO	Emx-DG
12	SO	JJ388	37.64335349999999	Emx-Cre+;DGF/+	Emx-DG-Ctrl	Emx-DG
12	SO	JJ388	37.64335349999999	Emx-Cre+;DGF/+	Emx-DG-Ctrl	Emx-DG
12	SO	JJ389	101.98539666666665	Emx-Cre+;DGF/+	Emx-DG-Ctrl	Emx-DG
12	SO	JJ390	43.80641299999999	Emx-Cre+;DGF/+	Emx-DG-Ctrl	Emx-DG
12	SO	JJ391	34.731712666666674	Emx-Cre+;DGF/+	Emx-DG-Ctrl	Emx-DG
12	SO	JJ392	2.689935333333333	Emx-Cre+;DGF/+	Emx-DG-Ctrl	Emx-DG
13	SO	JJ001	-19.261329	Emx-Cre+;POMT2F/+	Emx-POMT2-Ctrl	Emx-POMT2
13	SO	JJ002	125.65832100000002	Emx-Cre+;POMT2F/F	Emx-POMT2-cKO	Emx-POMT2
13	SO	JJ003	-7.647902666666657	Emx-Cre+;POMT2F/+	Emx-POMT2-Ctrl	Emx-POMT2
13	SO	JJ004	4.817515333333328	Emx-Cre+;POMT2F/+	Emx-POMT2-Ctrl	Emx-POMT2
13	SO	JJ005	-28.97828199999999	Emx-Cre+;POMT2F/+	Emx-POMT2-Ctrl	Emx-POMT2
13	SO	JJ006	125.951271	Emx-Cre+;POMT2F/F	Emx-POMT2-cKO	Emx-POMT2
13	SO	JJ007	2.698762000000007	Emx-Cre+;POMT2F/F	Emx-POMT2-cKO	Emx-POMT2
13	SO	JJ008	55.156186	Emx-Cre+;POMT2F/F	Emx-POMT2-cKO	Emx-POMT2
13	SO	JJ029	-35.18000966666667	WT	B4GAT1-Ctrl	B4GAT1
13	SO	JJ030	-35.07714533333333	WT	B4GAT1-Ctrl	B4GAT1
13	SO	JJ031	-51.66968000000001	WT	B4GAT1-Ctrl	B4GAT1
13	SO	JJ032	-30.404820666666684	WT	B4GAT1-Ctrl	B4GAT1
13	SO	JJ033	-6.003774333333335	B4GAT1M155T/M155T	B4GAT1-Mutant	B4GAT1
13	SO	JJ034	27.04335533333334	B4GAT1M155T/M155T	B4GAT1-Mutant	B4GAT1
13	SO	JJ035	9.217467999999977	B4GAT1M155T/M155T	B4GAT1-Mutant	B4GAT1
13	SO	JJ036	37.44451	B4GAT1M155T/M155T	B4GAT1-Mutant	B4GAT1
13	SO	JJ061	-8.730895333333327	B4GAT1M155T/M155T	B4GAT1-Mutant	B4GAT1
13	SO	JJ062	-11.67347966666667	B4GAT1M155T/M155T	B4GAT1-Mutant	B4GAT1
13	SO	JJ063	5.539507333333357	B4GAT1M155T/M155T	B4GAT1-Mutant	B4GAT1
13	SO	JJ064	88.87549366666669	B4GAT1M155T/M155T	B4GAT1-Mutant	B4GAT1
13	SO	JJ065	-12.684972000000007	B4GAT1M155T/M155T	B4GAT1-Mutant	B4GAT1
13	SO	JJ066	-26.003542333333332	B4GAT1M155T/M155T	B4GAT1-Mutant	B4GAT1
13	SO	JJ067	-9.725365333333334	B4GAT1M155T/M155T	B4GAT1-Mutant	B4GAT1
13	SO	JJ068	-31.680201333333333	B4GAT1M155T/M155T	B4GAT1-Mutant	B4GAT1
13	SO	JJ077	-3.91452466666667	B4GAT1M155T/M155T	B4GAT1-Mutant	B4GAT1
13	SO	JJ078	-13.192801333333326	B4GAT1M155T/M155T	B4GAT1-Mutant	B4GAT1
13	SO	JJ079	-11.888131333333328	B4GAT1M155T/M155T	B4GAT1-Mutant	B4GAT1
13	SO	JJ080	28.53713833333333	B4GAT1M155T/M155T	B4GAT1-Mutant	B4GAT1
13	SO	JJ089	95.58123633333334	B4GAT1M155T/M155T	B4GAT1-Mutant	B4GAT1
13	SO	JJ090	-1.9855403333333281	B4GAT1M155T/M155T	B4GAT1-Mutant	B4GAT1
13	SO	JJ091	9.859899000000004	B4GAT1M155T/M155T	B4GAT1-Mutant	B4GAT1
13	SO	JJ092	21.73450733333333	B4GAT1M155T/M155T	B4GAT1-Mutant	B4GAT1
13	SO	JJ093	-2.3720036666666524	WT	B4GAT1-Ctrl	B4GAT1
13	SO	JJ094	-20.25569033333333	WT	B4GAT1-Ctrl	B4GAT1
13	SO	JJ095	-5.836290666666666	WT	B4GAT1-Ctrl	B4GAT1
13	SO	JJ096	-4.454465333333322	WT	B4GAT1-Ctrl	B4GAT1
13	SO	JJ101	32.18875966666669	WT	B4GAT1-Ctrl	B4GAT1
13	SO	JJ102	14.012602333333348	WT	B4GAT1-Ctrl	B4GAT1
13	SO	JJ103	31.753230333333324	WT	B4GAT1-Ctrl	B4GAT1
13	SO	JJ104	5.570827333333341	WT	B4GAT1-Ctrl	B4GAT1
13	SO	JJ111	102.19214466666665	Emx-Cre+;DGF/-	Emx-DG-cKO	Emx-DG
13	SO	JJ112	24.563817333333304	Emx-Cre+;DGF/-	Emx-DG-cKO	Emx-DG
13	SO	JJ113	78.79533566666667	Emx-Cre+;DGF/-	Emx-DG-cKO	Emx-DG
13	SO	JJ118	53.69671366666663	Emx-Cre+;DGF/-	Emx-DG-cKO	Emx-DG
13	SO	JJ119	19.937511666666694	Emx-Cre+;DGF/-	Emx-DG-cKO	Emx-DG
13	SO	JJ120	31.333027666666652	Emx-Cre+;DGF/-	Emx-DG-cKO	Emx-DG
13	SO	JJ121	26.535363333333322	Emx-Cre+;DGF/-	Emx-DG-cKO	Emx-DG
13	SO	JJ134	-3.11119633333332	Emx-Cre+;DGF/+	Emx-DG-Ctrl	Emx-DG
13	SO	JJ135	4.622886333333345	Emx-Cre+;DGF/+	Emx-DG-Ctrl	Emx-DG
13	SO	JJ136	-7.8071543333333295	Emx-Cre+;DGF/+	Emx-DG-Ctrl	Emx-DG
13	SO	JJ137	57.58923466666667	Emx-Cre+;DGF/+	Emx-DG-Ctrl	Emx-DG
13	SO	JJ150	64.65631566666667	Emx-Cre+;POMT2F/F	Emx-POMT2-cKO	Emx-POMT2
13	SO	JJ151	87.816298	Emx-Cre+;POMT2F/F	Emx-POMT2-cKO	Emx-POMT2
13	SO	JJ152	186.1759866666667	Emx-Cre+;POMT2F/F	Emx-POMT2-cKO	Emx-POMT2
13	SO	JJ153	104.07704166666666	Emx-Cre+;POMT2F/F	Emx-POMT2-cKO	Emx-POMT2
13	SO	JJ154	-37.73072100000002	Emx-Cre+;POMT2F/+	Emx-POMT2-Ctrl	Emx-POMT2
13	SO	JJ155	-8.094003000000006	Emx-Cre+;POMT2F/+	Emx-POMT2-Ctrl	Emx-POMT2
13	SO	JJ156	-3.1683666666666945	Emx-Cre+;POMT2F/+	Emx-POMT2-Ctrl	Emx-POMT2
13	SO	JJ157	5.380896000000007	Emx-Cre+;POMT2F/+	Emx-POMT2-Ctrl	Emx-POMT2
13	SO	JJ227	84.02018133333335	Emx-Cre+;POMT2F/F	Emx-POMT2-cKO	Emx-POMT2
13	SO	JJ228	46.51578666666668	Emx-Cre+;POMT2F/F	Emx-POMT2-cKO	Emx-POMT2
13	SO	JJ229	46.66524366666666	Emx-Cre+;POMT2F/F	Emx-POMT2-cKO	Emx-POMT2
13	SO	JJ230	31.91408466666665	Emx-Cre+;POMT2F/F	Emx-POMT2-cKO	Emx-POMT2
13	SO	JJ235	30.48086333333332	Emx-Cre+;POMT2F/+	Emx-POMT2-Ctrl	Emx-POMT2
13	SO	JJ236	-0.9198123333333399	Emx-Cre+;POMT2F/+	Emx-POMT2-Ctrl	Emx-POMT2
13	SO	JJ237	4.565029999999989	Emx-Cre+;POMT2F/+	Emx-POMT2-Ctrl	Emx-POMT2
13	SO	JJ238	32.369453666666665	Emx-Cre+;POMT2F/+	Emx-POMT2-Ctrl	Emx-POMT2
13	SO	JJ243	0.24060166666665359	Emx-Cre+;POMT2F/+	Emx-POMT2-Ctrl	Emx-POMT2
13	SO	JJ244	-29.095916999999986	Emx-Cre+;POMT2F/+	Emx-POMT2-Ctrl	Emx-POMT2
13	SO	JJ245	10.877848666666674	Emx-Cre+;POMT2F/+	Emx-POMT2-Ctrl	Emx-POMT2
13	SO	JJ246	-14.838045666666668	Emx-Cre+;POMT2F/+	Emx-POMT2-Ctrl	Emx-POMT2
13	SO	JJ247	21.40198433333332	FKRPMut	FKRP-Mutant	FKRP
13	SO	JJ248	-12.866402000000003	FKRPMut	FKRP-Mutant	FKRP
13	SO	JJ249	-23.742218666666655	FKRPMut	FKRP-Mutant	FKRP
13	SO	JJ250	-3.136063666666672	FKRPMut	FKRP-Mutant	FKRP
13	SO	JJ251	75.56257699999999	WT	FKRP-Ctrl	FKRP
13	SO	JJ252	-11.029423333333341	WT	FKRP-Ctrl	FKRP
13	SO	JJ253	31.39065133333334	WT	FKRP-Ctrl	FKRP
13	SO	JJ254	12.631856666666664	WT	FKRP-Ctrl	FKRP
13	SO	JJ255	-9.973183333333338	WT	FKRP-Ctrl	FKRP
13	SO	JJ256	-3.0002006666666525	WT	FKRP-Ctrl	FKRP
13	SO	JJ257	20.412066666666647	WT	FKRP-Ctrl	FKRP
13	SO	JJ258	-3.351672000000027	WT	FKRP-Ctrl	FKRP
13	SO	JJ259	18.94582333333335	FKRPMut	FKRP-Mutant	FKRP
13	SO	JJ260	-11.17521633333333	FKRPMut	FKRP-Mutant	FKRP
13	SO	JJ261	-10.046034333333333	FKRPMut	FKRP-Mutant	FKRP
13	SO	JJ262	-19.093705333333343	FKRPMut	FKRP-Mutant	FKRP
13	SO	JJ263	28.654817333333312	WT	FKRP-Ctrl	FKRP
13	SO	JJ264	0.6383750000000153	WT	FKRP-Ctrl	FKRP
13	SO	JJ265	46.06108466666666	WT	FKRP-Ctrl	FKRP
13	SO	JJ266	39.49861666666669	WT	FKRP-Ctrl	FKRP
13	SO	JJ299	45.58172400000003	DGdelta/-	ICD-Mutant	ICD
13	SO	JJ300	39.3984	DGdelta/-	ICD-Mutant	ICD
13	SO	JJ301	49.09474533333336	DGdelta/-	ICD-Mutant	ICD
13	SO	JJ302	73.92476066666666	DGdelta/-	ICD-Mutant	ICD
13	SO	JJ307	18.30723766666669	WT	ICD-Ctrl	ICD
13	SO	JJ308	-21.372035666666687	WT	ICD-Ctrl	ICD
13	SO	JJ309	-24.488716333333326	WT	ICD-Ctrl	ICD
13	SO	JJ310	93.70659333333334	WT	ICD-Ctrl	ICD
13	SO	JJ331	41.526252	DGdelta/-	ICD-Mutant	ICD
13	SO	JJ332	48.395323	DGdelta/-	ICD-Mutant	ICD
13	SO	JJ333	8.876812666666675	DGdelta/-	ICD-Mutant	ICD
13	SO	JJ334	-5.371391999999996	DGdelta/-	ICD-Mutant	ICD
13	SO	JJ339	25.17603966666665	DGdelta/-	ICD-Mutant	ICD
13	SO	JJ340	35.05665999999999	DGdelta/-	ICD-Mutant	ICD
13	SO	JJ341	-26.629530999999986	DGdelta/-	ICD-Mutant	ICD
13	SO	JJ342	120.17082333333333	DGdelta/-	ICD-Mutant	ICD
13	SO	JJ347	9.404449666666645	WT	ICD-Ctrl	ICD
13	SO	JJ348	8.101842666666679	WT	ICD-Ctrl	ICD
13	SO	JJ349	11.681629999999984	WT	ICD-Ctrl	ICD
13	SO	JJ350	-0.9332666666666777	WT	ICD-Ctrl	ICD
13	SO	JJ355	15.942582666666672	WT	ICD-Ctrl	ICD
13	SO	JJ356	-8.91962	WT	ICD-Ctrl	ICD
13	SO	JJ357	-8.291539999999998	WT	ICD-Ctrl	ICD
13	SO	JJ358	-11.908940666666675	WT	ICD-Ctrl	ICD
13	SO	JJ362	0.7348430000000121	FKRPMut	FKRP-Mutant	FKRP
13	SO	JJ363	14.209541000000002	FKRPMut	FKRP-Mutant	FKRP
13	SO	JJ364	0.6279573333333511	FKRPMut	FKRP-Mutant	FKRP
13	SO	JJ365	-1.61336133333333	FKRPMut	FKRP-Mutant	FKRP
13	SO	JJ369	23.299252999999982	WT	FKRP-Ctrl	FKRP
13	SO	JJ370	-16.607013999999975	WT	FKRP-Ctrl	FKRP
13	SO	JJ371	-21.18875266666667	WT	FKRP-Ctrl	FKRP
13	SO	JJ372	9.614991666666697	WT	FKRP-Ctrl	FKRP
13	SO	JJ373	63.19448599999998	Emx-Cre+;DGF/-	Emx-DG-cKO	Emx-DG
13	SO	JJ374	54.80854033333335	Emx-Cre+;DGF/-	Emx-DG-cKO	Emx-DG
13	SO	JJ375	33.66069533333333	Emx-Cre+;DGF/-	Emx-DG-cKO	Emx-DG
13	SO	JJ376	-17.435875666666664	Emx-Cre+;DGF/-	Emx-DG-cKO	Emx-DG
13	SO	JJ377	43.456556999999975	Emx-Cre+;DGF/-	Emx-DG-cKO	Emx-DG
13	SO	JJ378	159.50953066666665	Emx-Cre+;DGF/-	Emx-DG-cKO	Emx-DG
13	SO	JJ379	58.177773333333334	Emx-Cre+;DGF/-	Emx-DG-cKO	Emx-DG
13	SO	JJ380	3.0243913333333317	Emx-Cre+;DGF/-	Emx-DG-cKO	Emx-DG
13	SO	JJ381	-1.0616683333333299	Emx-Cre+;DGF/+	Emx-DG-Ctrl	Emx-DG
13	SO	JJ382	-11.123933333333317	Emx-Cre+;DGF/+	Emx-DG-Ctrl	Emx-DG
13	SO	JJ384	-33.03373966666666	Emx-Cre+;DGF/+	Emx-DG-Ctrl	Emx-DG
13	SO	JJ385	3.675155999999987	Emx-Cre+;DGF/-	Emx-DG-cKO	Emx-DG
13	SO	JJ386	-16.245599500000004	Emx-Cre+;DGF/-	Emx-DG-cKO	Emx-DG
13	SO	JJ387	41.853144	Emx-Cre+;DGF/-	Emx-DG-cKO	Emx-DG
13	SO	JJ388	35.89796183333335	Emx-Cre+;DGF/+	Emx-DG-Ctrl	Emx-DG
13	SO	JJ388	35.89796183333335	Emx-Cre+;DGF/+	Emx-DG-Ctrl	Emx-DG
13	SO	JJ389	103.63561333333331	Emx-Cre+;DGF/+	Emx-DG-Ctrl	Emx-DG
13	SO	JJ390	37.50417966666665	Emx-Cre+;DGF/+	Emx-DG-Ctrl	Emx-DG
13	SO	JJ391	45.225962666666675	Emx-Cre+;DGF/+	Emx-DG-Ctrl	Emx-DG
13	SO	JJ392	-5.551098000000006	Emx-Cre+;DGF/+	Emx-DG-Ctrl	Emx-DG
14	SO	JJ001	-1.6980956666666647	Emx-Cre+;POMT2F/+	Emx-POMT2-Ctrl	Emx-POMT2
14	SO	JJ002	126.41223766666666	Emx-Cre+;POMT2F/F	Emx-POMT2-cKO	Emx-POMT2
14	SO	JJ003	-13.357852666666664	Emx-Cre+;POMT2F/+	Emx-POMT2-Ctrl	Emx-POMT2
14	SO	JJ004	11.724481999999995	Emx-Cre+;POMT2F/+	Emx-POMT2-Ctrl	Emx-POMT2
14	SO	JJ005	-25.326565333333335	Emx-Cre+;POMT2F/+	Emx-POMT2-Ctrl	Emx-POMT2
14	SO	JJ006	148.930821	Emx-Cre+;POMT2F/F	Emx-POMT2-cKO	Emx-POMT2
14	SO	JJ007	26.37642866666668	Emx-Cre+;POMT2F/F	Emx-POMT2-cKO	Emx-POMT2
14	SO	JJ008	61.409186000000005	Emx-Cre+;POMT2F/F	Emx-POMT2-cKO	Emx-POMT2
14	SO	JJ029	-20.859459666666663	WT	B4GAT1-Ctrl	B4GAT1
14	SO	JJ030	-23.520061999999996	WT	B4GAT1-Ctrl	B4GAT1
14	SO	JJ031	-30.269113333333337	WT	B4GAT1-Ctrl	B4GAT1
14	SO	JJ032	-16.216070666666667	WT	B4GAT1-Ctrl	B4GAT1
14	SO	JJ033	-7.747391000000003	B4GAT1M155T/M155T	B4GAT1-Mutant	B4GAT1
14	SO	JJ034	-16.84604466666666	B4GAT1M155T/M155T	B4GAT1-Mutant	B4GAT1
14	SO	JJ035	11.450867999999977	B4GAT1M155T/M155T	B4GAT1-Mutant	B4GAT1
14	SO	JJ036	18.346093333333318	B4GAT1M155T/M155T	B4GAT1-Mutant	B4GAT1
14	SO	JJ061	-13.860678666666672	B4GAT1M155T/M155T	B4GAT1-Mutant	B4GAT1
14	SO	JJ062	-8.183379666666658	B4GAT1M155T/M155T	B4GAT1-Mutant	B4GAT1
14	SO	JJ063	24.93602400000002	B4GAT1M155T/M155T	B4GAT1-Mutant	B4GAT1
14	SO	JJ064	44.678710333333335	B4GAT1M155T/M155T	B4GAT1-Mutant	B4GAT1
14	SO	JJ065	-18.94543866666667	B4GAT1M155T/M155T	B4GAT1-Mutant	B4GAT1
14	SO	JJ066	-17.494458999999996	B4GAT1M155T/M155T	B4GAT1-Mutant	B4GAT1
14	SO	JJ067	-9.333582000000007	B4GAT1M155T/M155T	B4GAT1-Mutant	B4GAT1
14	SO	JJ068	-24.162151333333345	B4GAT1M155T/M155T	B4GAT1-Mutant	B4GAT1
14	SO	JJ077	5.662991999999998	B4GAT1M155T/M155T	B4GAT1-Mutant	B4GAT1
14	SO	JJ078	-5.204817999999999	B4GAT1M155T/M155T	B4GAT1-Mutant	B4GAT1
14	SO	JJ079	9.90230200000002	B4GAT1M155T/M155T	B4GAT1-Mutant	B4GAT1
14	SO	JJ080	6.804138333333346	B4GAT1M155T/M155T	B4GAT1-Mutant	B4GAT1
14	SO	JJ089	88.887153	B4GAT1M155T/M155T	B4GAT1-Mutant	B4GAT1
14	SO	JJ090	-7.340273666666671	B4GAT1M155T/M155T	B4GAT1-Mutant	B4GAT1
14	SO	JJ091	5.864282333333345	B4GAT1M155T/M155T	B4GAT1-Mutant	B4GAT1
14	SO	JJ092	2.0823906666666594	B4GAT1M155T/M155T	B4GAT1-Mutant	B4GAT1
14	SO	JJ093	16.545996333333353	WT	B4GAT1-Ctrl	B4GAT1
14	SO	JJ094	-30.164407000000022	WT	B4GAT1-Ctrl	B4GAT1
14	SO	JJ095	6.2555760000000005	WT	B4GAT1-Ctrl	B4GAT1
14	SO	JJ096	-19.401315333333326	WT	B4GAT1-Ctrl	B4GAT1
14	SO	JJ101	29.96402633333334	WT	B4GAT1-Ctrl	B4GAT1
14	SO	JJ102	26.838935666666696	WT	B4GAT1-Ctrl	B4GAT1
14	SO	JJ103	50.87671366666666	WT	B4GAT1-Ctrl	B4GAT1
14	SO	JJ104	-16.385389333333325	WT	B4GAT1-Ctrl	B4GAT1
14	SO	JJ111	89.37371133333333	Emx-Cre+;DGF/-	Emx-DG-cKO	Emx-DG
14	SO	JJ112	70.58505066666665	Emx-Cre+;DGF/-	Emx-DG-cKO	Emx-DG
14	SO	JJ113	91.28138566666667	Emx-Cre+;DGF/-	Emx-DG-cKO	Emx-DG
14	SO	JJ118	63.92864699999999	Emx-Cre+;DGF/-	Emx-DG-cKO	Emx-DG
14	SO	JJ119	26.33839500000001	Emx-Cre+;DGF/-	Emx-DG-cKO	Emx-DG
14	SO	JJ120	22.810411	Emx-Cre+;DGF/-	Emx-DG-cKO	Emx-DG
14	SO	JJ121	55.65408	Emx-Cre+;DGF/-	Emx-DG-cKO	Emx-DG
14	SO	JJ134	11.663670333333338	Emx-Cre+;DGF/+	Emx-DG-Ctrl	Emx-DG
14	SO	JJ135	11.907219666666682	Emx-Cre+;DGF/+	Emx-DG-Ctrl	Emx-DG
14	SO	JJ136	3.8531289999999956	Emx-Cre+;DGF/+	Emx-DG-Ctrl	Emx-DG
14	SO	JJ137	70.78995133333332	Emx-Cre+;DGF/+	Emx-DG-Ctrl	Emx-DG
14	SO	JJ150	69.08583233333336	Emx-Cre+;POMT2F/F	Emx-POMT2-cKO	Emx-POMT2
14	SO	JJ151	79.02249799999997	Emx-Cre+;POMT2F/F	Emx-POMT2-cKO	Emx-POMT2
14	SO	JJ152	164.55330333333333	Emx-Cre+;POMT2F/F	Emx-POMT2-cKO	Emx-POMT2
14	SO	JJ153	83.18024166666669	Emx-Cre+;POMT2F/F	Emx-POMT2-cKO	Emx-POMT2
14	SO	JJ154	-35.703171	Emx-Cre+;POMT2F/+	Emx-POMT2-Ctrl	Emx-POMT2
14	SO	JJ155	58.122397	Emx-Cre+;POMT2F/+	Emx-POMT2-Ctrl	Emx-POMT2
14	SO	JJ156	14.873899999999992	Emx-Cre+;POMT2F/+	Emx-POMT2-Ctrl	Emx-POMT2
14	SO	JJ157	29.29027933333333	Emx-Cre+;POMT2F/+	Emx-POMT2-Ctrl	Emx-POMT2
14	SO	JJ227	50.185098000000004	Emx-Cre+;POMT2F/F	Emx-POMT2-cKO	Emx-POMT2
14	SO	JJ228	36.936903333333326	Emx-Cre+;POMT2F/F	Emx-POMT2-cKO	Emx-POMT2
14	SO	JJ229	61.73019366666666	Emx-Cre+;POMT2F/F	Emx-POMT2-cKO	Emx-POMT2
14	SO	JJ230	33.04026799999999	Emx-Cre+;POMT2F/F	Emx-POMT2-cKO	Emx-POMT2
14	SO	JJ235	30.107763333333338	Emx-Cre+;POMT2F/+	Emx-POMT2-Ctrl	Emx-POMT2
14	SO	JJ236	17.487354333333343	Emx-Cre+;POMT2F/+	Emx-POMT2-Ctrl	Emx-POMT2
14	SO	JJ237	21.382679999999993	Emx-Cre+;POMT2F/+	Emx-POMT2-Ctrl	Emx-POMT2
14	SO	JJ238	25.42877033333333	Emx-Cre+;POMT2F/+	Emx-POMT2-Ctrl	Emx-POMT2
14	SO	JJ243	12.599784999999997	Emx-Cre+;POMT2F/+	Emx-POMT2-Ctrl	Emx-POMT2
14	SO	JJ244	-28.105400333333325	Emx-Cre+;POMT2F/+	Emx-POMT2-Ctrl	Emx-POMT2
14	SO	JJ245	-0.18660133333331905	Emx-Cre+;POMT2F/+	Emx-POMT2-Ctrl	Emx-POMT2
14	SO	JJ246	2.467837666666668	Emx-Cre+;POMT2F/+	Emx-POMT2-Ctrl	Emx-POMT2
14	SO	JJ247	7.69396766666669	FKRPMut	FKRP-Mutant	FKRP
14	SO	JJ248	-14.731735333333338	FKRPMut	FKRP-Mutant	FKRP
14	SO	JJ249	0.27596466666668107	FKRPMut	FKRP-Mutant	FKRP
14	SO	JJ250	-11.786180333333343	FKRPMut	FKRP-Mutant	FKRP
14	SO	JJ251	92.43354366666667	WT	FKRP-Ctrl	FKRP
14	SO	JJ252	-3.016856666666674	WT	FKRP-Ctrl	FKRP
14	SO	JJ253	22.995268	WT	FKRP-Ctrl	FKRP
14	SO	JJ254	37.145106666666656	WT	FKRP-Ctrl	FKRP
14	SO	JJ255	5.645700000000015	WT	FKRP-Ctrl	FKRP
14	SO	JJ256	13.450682666666674	WT	FKRP-Ctrl	FKRP
14	SO	JJ257	15.420083333333329	WT	FKRP-Ctrl	FKRP
14	SO	JJ258	10.159544666666648	WT	FKRP-Ctrl	FKRP
14	SO	JJ259	28.77444000000001	FKRPMut	FKRP-Mutant	FKRP
14	SO	JJ260	-5.278433000000007	FKRPMut	FKRP-Mutant	FKRP
14	SO	JJ261	-6.20973433333332	FKRPMut	FKRP-Mutant	FKRP
14	SO	JJ262	-0.22765533333335006	FKRPMut	FKRP-Mutant	FKRP
14	SO	JJ263	-13.481632666666693	WT	FKRP-Ctrl	FKRP
14	SO	JJ264	5.9138250000000125	WT	FKRP-Ctrl	FKRP
14	SO	JJ265	25.38418466666667	WT	FKRP-Ctrl	FKRP
14	SO	JJ266	31.938200000000013	WT	FKRP-Ctrl	FKRP
14	SO	JJ299	37.328374	DGdelta/-	ICD-Mutant	ICD
14	SO	JJ300	0.45523333333331567	DGdelta/-	ICD-Mutant	ICD
14	SO	JJ301	11.76017866666668	DGdelta/-	ICD-Mutant	ICD
14	SO	JJ302	41.691277333333346	DGdelta/-	ICD-Mutant	ICD
14	SO	JJ307	35.91070433333334	WT	ICD-Ctrl	ICD
14	SO	JJ308	-12.678585666666644	WT	ICD-Ctrl	ICD
14	SO	JJ309	-10.301032999999999	WT	ICD-Ctrl	ICD
14	SO	JJ310	86.38749333333334	WT	ICD-Ctrl	ICD
14	SO	JJ331	64.047952	DGdelta/-	ICD-Mutant	ICD
14	SO	JJ332	37.521756333333315	DGdelta/-	ICD-Mutant	ICD
14	SO	JJ333	28.438196000000005	DGdelta/-	ICD-Mutant	ICD
14	SO	JJ334	4.18484133333332	DGdelta/-	ICD-Mutant	ICD
14	SO	JJ339	21.197206333333344	DGdelta/-	ICD-Mutant	ICD
14	SO	JJ340	24.542460000000005	DGdelta/-	ICD-Mutant	ICD
14	SO	JJ341	-3.9526143333333152	DGdelta/-	ICD-Mutant	ICD
14	SO	JJ342	73.97940666666665	DGdelta/-	ICD-Mutant	ICD
14	SO	JJ347	8.934733000000014	WT	ICD-Ctrl	ICD
14	SO	JJ348	-4.843090666666683	WT	ICD-Ctrl	ICD
14	SO	JJ349	11.291396666666657	WT	ICD-Ctrl	ICD
14	SO	JJ350	-11.839649999999997	WT	ICD-Ctrl	ICD
14	SO	JJ355	-3.3617340000000033	WT	ICD-Ctrl	ICD
14	SO	JJ356	-19.889370000000003	WT	ICD-Ctrl	ICD
14	SO	JJ357	-14.74660666666667	WT	ICD-Ctrl	ICD
14	SO	JJ358	-10.102740666666685	WT	ICD-Ctrl	ICD
14	SO	JJ362	-0.47012366666666594	FKRPMut	FKRP-Mutant	FKRP
14	SO	JJ363	11.483974333333322	FKRPMut	FKRP-Mutant	FKRP
14	SO	JJ364	1.6533240000000167	FKRPMut	FKRP-Mutant	FKRP
14	SO	JJ365	12.368155333333334	FKRPMut	FKRP-Mutant	FKRP
14	SO	JJ369	30.145369666666664	WT	FKRP-Ctrl	FKRP
14	SO	JJ370	-13.379480666666646	WT	FKRP-Ctrl	FKRP
14	SO	JJ371	-11.625586000000018	WT	FKRP-Ctrl	FKRP
14	SO	JJ372	21.438641666666683	WT	FKRP-Ctrl	FKRP
14	SO	JJ373	66.45890266666663	Emx-Cre+;DGF/-	Emx-DG-cKO	Emx-DG
14	SO	JJ374	51.13305699999999	Emx-Cre+;DGF/-	Emx-DG-cKO	Emx-DG
14	SO	JJ375	24.457162	Emx-Cre+;DGF/-	Emx-DG-cKO	Emx-DG
14	SO	JJ376	17.429407666666673	Emx-Cre+;DGF/-	Emx-DG-cKO	Emx-DG
14	SO	JJ377	29.070956999999982	Emx-Cre+;DGF/-	Emx-DG-cKO	Emx-DG
14	SO	JJ378	147.26593066666663	Emx-Cre+;DGF/-	Emx-DG-cKO	Emx-DG
14	SO	JJ379	42.08479000000002	Emx-Cre+;DGF/-	Emx-DG-cKO	Emx-DG
14	SO	JJ380	18.54319133333333	Emx-Cre+;DGF/-	Emx-DG-cKO	Emx-DG
14	SO	JJ381	6.212014999999989	Emx-Cre+;DGF/+	Emx-DG-Ctrl	Emx-DG
14	SO	JJ382	24.44935	Emx-Cre+;DGF/+	Emx-DG-Ctrl	Emx-DG
14	SO	JJ384	-38.640623	Emx-Cre+;DGF/+	Emx-DG-Ctrl	Emx-DG
14	SO	JJ385	5.073405999999977	Emx-Cre+;DGF/-	Emx-DG-cKO	Emx-DG
14	SO	JJ386	-15.472699499999997	Emx-Cre+;DGF/-	Emx-DG-cKO	Emx-DG
14	SO	JJ387	35.65719399999999	Emx-Cre+;DGF/-	Emx-DG-cKO	Emx-DG
14	SO	JJ388	39.5849785	Emx-Cre+;DGF/+	Emx-DG-Ctrl	Emx-DG
14	SO	JJ388	39.5849785	Emx-Cre+;DGF/+	Emx-DG-Ctrl	Emx-DG
14	SO	JJ389	103.59131333333333	Emx-Cre+;DGF/+	Emx-DG-Ctrl	Emx-DG
[truncated: 55,201 more rows]
