# Supplementary material for: Inhibitory CCK+ basket synapse defects in mouse models of dystroglycanopathy
Source: eLife. 2024 Jan 5;12:RP87965. doi: 10.7554/eLife.87965 (PMC10942650; doi:10.7554/eLife.87965)
Supplement: Figure 4—source data 1. [file elife-87965-fig4-data1.csv]

um	Region	Age	Image	Intensity	Genotype	Condition
1	SO	P5	DM001	68.47087666666665	Emx-Cre+;DGF/-	Emx-DG-cKO
1	SO	P5	DM002	81.64105533333334	Emx-Cre+;DGF/-	Emx-DG-cKO
1	SO	P5	DM003	61.943078	Emx-Cre+;DGF/-	Emx-DG-cKO
1	SO	P5	DM004	46.603251466666684	Emx-Cre+;DGF/-	Emx-DG-cKO
1	SO	P5	DM005	63.16357533333334	Emx-Cre+;DGF/-	Emx-DG-cKO
1	SO	P5	DM006	31.605172666666665	Emx-Cre+;DGF/-	Emx-DG-cKO
1	SO	P5	DM007	35.5103137	Emx-Cre+;DGF/-	Emx-DG-cKO
1	SO	P5	DM008	27.637808666666672	Emx-Cre+;DGF/-	Emx-DG-cKO
1	SO	P5	DM009	27.895067	Emx-Cre+;DGF/-	Emx-DG-cKO
1	SO	P5	DM010	57.718573	Emx-Cre+;DGF/-	Emx-DG-cKO
1	SO	P5	DM011	27.439335900000003	Emx-Cre+;DGF/-	Emx-DG-cKO
1	SO	P5	DM012	21.199606000000003	Emx-Cre+;DGF/-	Emx-DG-cKO
1	SO	P5	DM013	72.37841166666666	Emx-Cre+;DGF/-	Emx-DG-cKO
1	SO	P5	DM014	122.01627766666668	Emx-Cre+;DGF/-	Emx-DG-cKO
1	SO	P5	DM015	101.72549066666664	Emx-Cre+;DGF/-	Emx-DG-cKO
1	SO	P5	DM016	65.30138466666669	Emx-Cre+;DGF/-	Emx-DG-cKO
1	SO	P5	DM017	97.34877566666667	Emx-Cre+;DGF/-	Emx-DG-cKO
1	SO	P5	DM018	78.93082866666667	Emx-Cre+;DGF/-	Emx-DG-cKO
1	SO	P5	DM019	106.556335	Emx-Cre+;DGF/-	Emx-DG-cKO
1	SO	P5	DM020	29.27194400000001	Emx-Cre+;DGF/-	Emx-DG-cKO
1	SO	P5	DM021	67.608152	Emx-Cre+;DGF/-	Emx-DG-cKO
1	SO	P5	DM022	46.71012966666667	Emx-Cre+;DGF/-	Emx-DG-cKO
1	SO	P5	DM023	73.15389400000001	Emx-Cre+;DGF/-	Emx-DG-cKO
1	SO	P5	DM024	42.053368	Emx-Cre+;DGF/-	Emx-DG-cKO
1	SO	P5	DM025	113.42669733333335	Emx-Cre+;DGF/-	Emx-DG-cKO
1	SO	P5	DM026	164.13842200000002	Emx-Cre+;DGF/-	Emx-DG-cKO
1	SO	P5	DM027	119.198201	Emx-Cre+;DGF/-	Emx-DG-cKO
1	SO	P5	DM028	122.52794233333331	Emx-Cre+;DGF/-	Emx-DG-cKO
1	SO	P5	DM029	88.91926566666666	Emx-Cre+;DGF/-	Emx-DG-cKO
1	SO	P5	DM030	35.699093000000005	Emx-Cre+;DGF/-	Emx-DG-cKO
1	SO	P5	DM031	141.52060199999997	Emx-Cre+;DGF/-	Emx-DG-cKO
1	SO	P5	DM032	10.559972833333333	Emx-Cre+;DGF/-	Emx-DG-cKO
1	SO	P5	DM033	147.98870333333335	Emx-Cre+;DGF/-	Emx-DG-cKO
1	SO	P5	DM034	132.569988	Emx-Cre+;DGF/-	Emx-DG-cKO
1	SO	P5	DM035	113.55854066666666	Emx-Cre+;DGF/-	Emx-DG-cKO
1	SO	P5	DM036	63.17982466666667	Emx-Cre+;DGF/-	Emx-DG-cKO
1	SO	P5	DM037	152.17483566666667	Emx-Cre+;DGF/-	Emx-DG-cKO
1	SO	P5	DM038	114.02287333333332	Emx-Cre+;DGF/-	Emx-DG-cKO
1	SO	P5	DM039	106.81782033333333	Emx-Cre+;DGF/-	Emx-DG-cKO
1	SO	P5	DM040	42.62858466666666	Emx-Cre+;DGF/-	Emx-DG-cKO
1	SO	P5	DM041	18.311176333333332	Emx-Cre+;DGF/-	Emx-DG-cKO
1	SO	P5	DM042	28.95027966666667	Emx-Cre+;DGF/-	Emx-DG-cKO
1	SO	P5	DM043	24.761573999999996	Emx-Cre+;DGF/-	Emx-DG-cKO
1	SO	P5	DM044	-36.21316733333334	Emx-Cre+;DGF/+	Emx-DG-Ctrl
1	SO	P5	DM045	-3.0771119999999996	Emx-Cre+;DGF/+	Emx-DG-Ctrl
1	SO	P5	DM046	24.257393666666662	Emx-Cre+;DGF/+	Emx-DG-Ctrl
1	SO	P5	DM047	27.728153333333335	Emx-Cre+;DGF/+	Emx-DG-Ctrl
1	SO	P5	DM048	14.018957666666665	Emx-Cre+;DGF/+	Emx-DG-Ctrl
1	SO	P5	DM049	9.745848666666689	Emx-Cre+;DGF/+	Emx-DG-Ctrl
1	SO	P5	DM050	-22.310267999999997	Emx-Cre+;DGF/+	Emx-DG-Ctrl
1	SO	P5	DM051	-24.677411999999986	Emx-Cre+;DGF/+	Emx-DG-Ctrl
1	SO	P5	DM052	31.963565999999986	Emx-Cre+;DGF/+	Emx-DG-Ctrl
1	SO	P5	DM053	13.628895666666665	Emx-Cre+;DGF/+	Emx-DG-Ctrl
1	SO	P5	DM054	48.24671233333333	Emx-Cre+;DGF/+	Emx-DG-Ctrl
1	SO	P5	DM055	48.16283733333333	Emx-Cre+;DGF/+	Emx-DG-Ctrl
1	SO	P5	DM056	28.057461666666665	Emx-Cre+;DGF/+	Emx-DG-Ctrl
1	SO	P5	DM057	49.357584333333314	Emx-Cre+;DGF/+	Emx-DG-Ctrl
1	SO	P5	DM058	22.14955233333332	Emx-Cre+;DGF/+	Emx-DG-Ctrl
1	SO	P5	DM059	76.36201433333333	Emx-Cre+;DGF/+	Emx-DG-Ctrl
1	SO	P5	DM060	43.322748333333315	Emx-Cre+;DGF/+	Emx-DG-Ctrl
1	SO	P5	DM061	26.425840000000004	Emx-Cre+;DGF/+	Emx-DG-Ctrl
1	SO	P5	DM062	18.78988666666667	Emx-Cre+;DGF/+	Emx-DG-Ctrl
1	SO	P5	DM063	-7.065708666666666	Emx-Cre+;DGF/+	Emx-DG-Ctrl
1	SO	P5	DM064	16.20003966666667	Emx-Cre+;DGF/+	Emx-DG-Ctrl
1	SO	P5	DM065	32.633038666666664	Emx-Cre+;DGF/+	Emx-DG-Ctrl
1	SO	P5	DM066	9.624197333333333	Emx-Cre+;DGF/+	Emx-DG-Ctrl
1	SO	P5	DM067	53.85552266666667	Emx-Cre+;DGF/+	Emx-DG-Ctrl
1	SO	P5	DM068	62.780849999999994	Emx-Cre+;DGF/+	Emx-DG-Ctrl
1	SO	P5	DM069	57.955751	Emx-Cre+;DGF/+	Emx-DG-Ctrl
1	SO	P5	DM070	2.9638536666666653	Emx-Cre+;DGF/+	Emx-DG-Ctrl
1	SO	P5	DM071	15.667779333333337	Emx-Cre+;DGF/+	Emx-DG-Ctrl
1	SO	P5	DM072	6.592892666666671	Emx-Cre+;DGF/+	Emx-DG-Ctrl
1	SO	P5	DM073	-21.545025	Emx-Cre+;DGF/+	Emx-DG-Ctrl
1	SO	P5	DM074	26.235019333333327	Emx-Cre+;DGF/+	Emx-DG-Ctrl
1	SO	P5	DM075	46.248914333333346	Emx-Cre+;DGF/+	Emx-DG-Ctrl
-19	SO	P10	DM076	258.88335766666665	Emx-Cre+;DGF/-	Emx-DG-cKO
-19	SO	P10	DM077	103.58165233333334	Emx-Cre+;DGF/-	Emx-DG-cKO
-19	SO	P10	DM078	81.45665699999999	Emx-Cre+;DGF/-	Emx-DG-cKO
-19	SO	P10	DM079	81.08921166666666	Emx-Cre+;DGF/-	Emx-DG-cKO
-19	SO	P10	DM080	80.44083766666667	Emx-Cre+;DGF/-	Emx-DG-cKO
-19	SO	P10	DM081	81.66221200000001	Emx-Cre+;DGF/-	Emx-DG-cKO
-19	SO	P10	DM082	91.92203633333334	Emx-Cre+;DGF/-	Emx-DG-cKO
-19	SO	P10	DM083	80.356383	Emx-Cre+;DGF/-	Emx-DG-cKO
-19	SO	P10	DM084	101.14880500000002	Emx-Cre+;DGF/-	Emx-DG-cKO
-19	SO	P10	DM085	62.590434666666674	Emx-Cre+;DGF/-	Emx-DG-cKO
-19	SO	P10	DM086	70.02330133333334	Emx-Cre+;DGF/-	Emx-DG-cKO
-19	SO	P10	DM087	28.749422999999997	Emx-Cre+;DGF/-	Emx-DG-cKO
-19	SO	P10	DM088	106.95346799999999	Emx-Cre+;DGF/-	Emx-DG-cKO
-19	SO	P10	DM089	29.653471333333318	Emx-Cre+;DGF/-	Emx-DG-cKO
-19	SO	P10	DM090	77.10704366666668	Emx-Cre+;DGF/-	Emx-DG-cKO
-19	SO	P10	DM091	-14.547374666666665	Emx-Cre+;DGF/-	Emx-DG-cKO
-19	SO	P10	DM092	84.42191199999998	Emx-Cre+;DGF/-	Emx-DG-cKO
-19	SO	P10	DM093	-43.501096	Emx-Cre+;DGF/-	Emx-DG-cKO
-19	SO	P10	DM094	28.904866666666653	Emx-Cre+;DGF/-	Emx-DG-cKO
-19	SO	P10	DM095	28.61932566666667	Emx-Cre+;DGF/-	Emx-DG-cKO
-19	SO	P10	DM096	29.739616000000012	Emx-Cre+;DGF/-	Emx-DG-cKO
-19	SO	P10	DM097	20.836496999999998	Emx-Cre+;DGF/-	Emx-DG-cKO
-19	SO	P10	DM098	132.166698	Emx-Cre+;DGF/-	Emx-DG-cKO
-19	SO	P10	DM099	-29.775797333333344	Emx-Cre+;DGF/-	Emx-DG-cKO
-19	SO	P10	DM100	44.08592166666668	Emx-Cre+;DGF/-	Emx-DG-cKO
-19	SO	P10	DM101	-23.309059	Emx-Cre+;DGF/-	Emx-DG-cKO
-19	SO	P10	DM102	-22.288280000000004	Emx-Cre+;DGF/-	Emx-DG-cKO
-19	SO	P10	DM103	22.319101666666672	Emx-Cre+;DGF/-	Emx-DG-cKO
-19	SO	P10	DM104	71.82905766666666	Emx-Cre+;DGF/-	Emx-DG-cKO
-19	SO	P10	DM105	42.21793599999999	Emx-Cre+;DGF/-	Emx-DG-cKO
-19	SO	P10	DM106	51.10982633333334	Emx-Cre+;DGF/-	Emx-DG-cKO
-19	SO	P10	DM107	-4.330191333333336	Emx-Cre+;DGF/-	Emx-DG-cKO
-19	SO	P10	DM108	30.183583666666674	Emx-Cre+;DGF/-	Emx-DG-cKO
-19	SO	P10	DM109	-59.36547533333333	Emx-Cre+;DGF/-	Emx-DG-cKO
-19	SO	P10	DM110	36.754693999999994	Emx-Cre+;DGF/-	Emx-DG-cKO
-19	SO	P10	DM111	62.33354633333334	Emx-Cre+;DGF/-	Emx-DG-cKO
-19	SO	P10	DM112	138.575002	Emx-Cre+;DGF/-	Emx-DG-cKO
-19	SO	P10	DM113	65.71888199999998	Emx-Cre+;DGF/-	Emx-DG-cKO
-19	SO	P10	DM114	-31.854211000000006	Emx-Cre+;DGF/-	Emx-DG-cKO
-19	SO	P10	DM115	24.276536000000004	Emx-Cre+;DGF/-	Emx-DG-cKO
-19	SO	P10	DM116	2.06033366666667	Emx-Cre+;DGF/-	Emx-DG-cKO
-19	SO	P10	DM117	25.273797333333345	Emx-Cre+;DGF/-	Emx-DG-cKO
-19	SO	P10	DM118	13.619776666666676	Emx-Cre+;DGF/-	Emx-DG-cKO
-19	SO	P10	DM119	1.8849676666666824	Emx-Cre+;DGF/-	Emx-DG-cKO
-19	SO	P10	DM120	-1.9816106666666542	Emx-Cre+;DGF/+	Emx-DG-Ctrl
-19	SO	P10	DM121	-45.567813333333305	Emx-Cre+;DGF/+	Emx-DG-Ctrl
-19	SO	P10	DM122	-69.28475266666668	Emx-Cre+;DGF/+	Emx-DG-Ctrl
-19	SO	P10	DM123	-41.31165566666667	Emx-Cre+;DGF/+	Emx-DG-Ctrl
-19	SO	P10	DM124	-57.856744000000006	Emx-Cre+;DGF/+	Emx-DG-Ctrl
-19	SO	P10	DM125	-21.027698999999995	Emx-Cre+;DGF/+	Emx-DG-Ctrl
-19	SO	P10	DM126	-64.318559	Emx-Cre+;DGF/+	Emx-DG-Ctrl
-19	SO	P10	DM127	-28.950734333333326	Emx-Cre+;DGF/+	Emx-DG-Ctrl
-19	SO	P10	DM128	-41.675686333333324	Emx-Cre+;DGF/+	Emx-DG-Ctrl
-19	SO	P10	DM129	-39.175205333333324	Emx-Cre+;DGF/+	Emx-DG-Ctrl
-19	SO	P10	DM130	-42.93285333333333	Emx-Cre+;DGF/+	Emx-DG-Ctrl
-19	SO	P10	DM131	-54.01970433333335	Emx-Cre+;DGF/+	Emx-DG-Ctrl
-19	SO	P10	DM132	-83.87662266666668	Emx-Cre+;DGF/+	Emx-DG-Ctrl
-19	SO	P10	DM133	-23.373863333333333	Emx-Cre+;DGF/+	Emx-DG-Ctrl
-19	SO	P10	DM134	-29.73794266666668	Emx-Cre+;DGF/+	Emx-DG-Ctrl
-19	SO	P10	DM135	-17.89811800000001	Emx-Cre+;DGF/+	Emx-DG-Ctrl
-19	SO	P10	DM136	-41.79987766666667	Emx-Cre+;DGF/+	Emx-DG-Ctrl
-19	SO	P10	DM137	-25.193773333333336	Emx-Cre+;DGF/+	Emx-DG-Ctrl
-19	SO	P10	DM138	-26.031805000000002	Emx-Cre+;DGF/+	Emx-DG-Ctrl
-19	SO	P10	DM139	-18.026056666666666	Emx-Cre+;DGF/+	Emx-DG-Ctrl
-19	SO	P10	DM140	-47.616325666666654	Emx-Cre+;DGF/+	Emx-DG-Ctrl
-19	SO	P10	DM141	-71.58199866666668	Emx-Cre+;DGF/+	Emx-DG-Ctrl
-19	SO	P10	DM142	-49.93245133333333	Emx-Cre+;DGF/+	Emx-DG-Ctrl
-19	SO	P10	DM143	-40.50521766666667	Emx-Cre+;DGF/+	Emx-DG-Ctrl
-19	SO	P10	DM144	-16.510798666666677	Emx-Cre+;DGF/+	Emx-DG-Ctrl
-19	SO	P10	DM145	-18.829164333333324	Emx-Cre+;DGF/+	Emx-DG-Ctrl
-19	SO	P10	DM146	-55.47415766666667	Emx-Cre+;DGF/+	Emx-DG-Ctrl
-19	SO	P10	DM147	-42.95417133333334	Emx-Cre+;DGF/+	Emx-DG-Ctrl
-19	SO	P10	DM148	-53.196428000000004	Emx-Cre+;DGF/+	Emx-DG-Ctrl
-19	SO	P10	DM149	-36.152989	Emx-Cre+;DGF/+	Emx-DG-Ctrl
1	SO	P15	DM150	-25.556302666666667	Emx-Cre+;DGF/-	Emx-DG-cKO
1	SO	P15	DM151	-11.752038000000013	Emx-Cre+;DGF/-	Emx-DG-cKO
1	SO	P15	DM152	3.7752920000000025	Emx-Cre+;DGF/-	Emx-DG-cKO
1	SO	P15	DM153	-20.722187	Emx-Cre+;DGF/-	Emx-DG-cKO
1	SO	P15	DM154	-5.925745999999994	Emx-Cre+;DGF/-	Emx-DG-cKO
1	SO	P15	DM155	-26.48992733333333	Emx-Cre+;DGF/-	Emx-DG-cKO
1	SO	P15	DM156	-13.619673333333338	Emx-Cre+;DGF/-	Emx-DG-cKO
1	SO	P15	DM157	-3.6617629999999983	Emx-Cre+;DGF/-	Emx-DG-cKO
1	SO	P15	DM158	6.114662333333324	Emx-Cre+;DGF/-	Emx-DG-cKO
1	SO	P15	DM159	-8.429395999999997	Emx-Cre+;DGF/-	Emx-DG-cKO
1	SO	P15	DM160	-6.967032000000013	Emx-Cre+;DGF/-	Emx-DG-cKO
1	SO	P15	DM161	-38.26441666666666	Emx-Cre+;DGF/-	Emx-DG-cKO
1	SO	P15	DM162	-20.131607333333346	Emx-Cre+;DGF/-	Emx-DG-cKO
1	SO	P15	DM163	-10.273526999999993	Emx-Cre+;DGF/-	Emx-DG-cKO
1	SO	P15	DM164	-27.949036000000007	Emx-Cre+;DGF/-	Emx-DG-cKO
1	SO	P15	DM165	-7.026644666666679	Emx-Cre+;DGF/-	Emx-DG-cKO
1	SO	P15	DM166	5.617190333333336	Emx-Cre+;DGF/-	Emx-DG-cKO
1	SO	P15	DM167	-36.763176333333334	Emx-Cre+;DGF/-	Emx-DG-cKO
1	SO	P15	DM168	-4.474174333333328	Emx-Cre+;DGF/-	Emx-DG-cKO
1	SO	P15	DM169	18.248084999999993	Emx-Cre+;DGF/-	Emx-DG-cKO
1	SO	P15	DM170	-27.90766633333334	Emx-Cre+;DGF/-	Emx-DG-cKO
1	SO	P15	DM171	-44.163777333333336	Emx-Cre+;DGF/-	Emx-DG-cKO
1	SO	P15	DM172	-18.901427333333334	Emx-Cre+;DGF/-	Emx-DG-cKO
1	SO	P15	DM173	5.39027333333335	Emx-Cre+;DGF/-	Emx-DG-cKO
1	SO	P15	DM174	53.21475	Emx-Cre+;DGF/-	Emx-DG-cKO
1	SO	P15	DM175	-7.700475999999999	Emx-Cre+;DGF/-	Emx-DG-cKO
1	SO	P15	DM176	-5.613240333333313	Emx-Cre+;DGF/-	Emx-DG-cKO
1	SO	P15	DM177	46.587540333333344	Emx-Cre+;DGF/-	Emx-DG-cKO
1	SO	P15	DM178	-27.320809000000008	Emx-Cre+;DGF/-	Emx-DG-cKO
1	SO	P15	DM179	8.075798666666666	Emx-Cre+;DGF/-	Emx-DG-cKO
1	SO	P15	DM180	6.834718999999997	Emx-Cre+;DGF/-	Emx-DG-cKO
1	SO	P15	DM181	-16.44036300000001	Emx-Cre+;DGF/-	Emx-DG-cKO
1	SO	P15	DM182	12.402304666666671	Emx-Cre+;DGF/-	Emx-DG-cKO
1	SO	P15	DM183	-22.244313999999992	Emx-Cre+;DGF/-	Emx-DG-cKO
1	SO	P15	DM184	-7.609445666666663	Emx-Cre+;DGF/-	Emx-DG-cKO
1	SO	P15	DM185	-39.298356	Emx-Cre+;DGF/-	Emx-DG-cKO
1	SO	P15	DM186	-41.973496000000004	Emx-Cre+;DGF/-	Emx-DG-cKO
1	SO	P15	DM187	-2.796859666666677	Emx-Cre+;DGF/-	Emx-DG-cKO
1	SO	P15	DM188	-22.53082799999999	Emx-Cre+;DGF/-	Emx-DG-cKO
1	SO	P15	DM189	-39.91977766666667	Emx-Cre+;DGF/-	Emx-DG-cKO
1	SO	P15	DM190	-43.17734566666666	Emx-Cre+;DGF/-	Emx-DG-cKO
1	SO	P15	DM191	-5.481475333333331	Emx-Cre+;DGF/-	Emx-DG-cKO
1	SO	P15	DM192	-29.623198666666667	Emx-Cre+;DGF/-	Emx-DG-cKO
1	SO	P15	DM193	-8.538406999999998	Emx-Cre+;DGF/-	Emx-DG-cKO
1	SO	P15	DM194	-23.887552666666675	Emx-Cre+;DGF/+	Emx-DG-Ctrl
1	SO	P15	DM195	-19.137105666666656	Emx-Cre+;DGF/+	Emx-DG-Ctrl
1	SO	P15	DM196	-33.355224666666665	Emx-Cre+;DGF/+	Emx-DG-Ctrl
1	SO	P15	DM197	-51.27057299999999	Emx-Cre+;DGF/+	Emx-DG-Ctrl
1	SO	P15	DM198	-44.80530533333333	Emx-Cre+;DGF/+	Emx-DG-Ctrl
1	SO	P15	DM199	-13.516198000000003	Emx-Cre+;DGF/+	Emx-DG-Ctrl
1	SO	P15	DM200	-26.370581666666663	Emx-Cre+;DGF/+	Emx-DG-Ctrl
1	SO	P15	DM201	-53.70263433333334	Emx-Cre+;DGF/+	Emx-DG-Ctrl
1	SO	P15	DM202	-42.282826666666665	Emx-Cre+;DGF/+	Emx-DG-Ctrl
1	SO	P15	DM203	-41.48883999999999	Emx-Cre+;DGF/+	Emx-DG-Ctrl
1	SO	P15	DM204	-48.70349466666667	Emx-Cre+;DGF/+	Emx-DG-Ctrl
1	SO	P15	DM205	-72.46401133333336	Emx-Cre+;DGF/+	Emx-DG-Ctrl
1	SO	P15	DM206	6.542476999999981	Emx-Cre+;DGF/+	Emx-DG-Ctrl
1	SO	P15	DM207	-60.41251833333333	Emx-Cre+;DGF/+	Emx-DG-Ctrl
1	SO	P15	DM208	-36.875283666666675	Emx-Cre+;DGF/+	Emx-DG-Ctrl
1	SO	P15	DM209	-43.62553566666667	Emx-Cre+;DGF/+	Emx-DG-Ctrl
1	SO	P15	DM210	-29.083893000000007	Emx-Cre+;DGF/+	Emx-DG-Ctrl
1	SO	P15	DM211	-27.047870333333325	Emx-Cre+;DGF/+	Emx-DG-Ctrl
1	SO	P15	DM212	-40.220524000000005	Emx-Cre+;DGF/+	Emx-DG-Ctrl
1	SO	P15	DM213	-57.805774666666665	Emx-Cre+;DGF/+	Emx-DG-Ctrl
1	SO	P15	DM214	-79.31165933333334	Emx-Cre+;DGF/+	Emx-DG-Ctrl
1	SO	P15	DM215	-64.99596333333334	Emx-Cre+;DGF/+	Emx-DG-Ctrl
1	SO	P15	DM216	-37.71337433333332	Emx-Cre+;DGF/+	Emx-DG-Ctrl
1	SO	P15	DM217	-75.82303466666667	Emx-Cre+;DGF/+	Emx-DG-Ctrl
1	SO	P15	DM218	-67.27442566666667	Emx-Cre+;DGF/+	Emx-DG-Ctrl
1	SO	P15	DM219	2.9755383333333136	Emx-Cre+;DGF/+	Emx-DG-Ctrl
1	SO	P15	DM220	-24.57110266666666	Emx-Cre+;DGF/+	Emx-DG-Ctrl
1	SO	P15	DM221	-24.61051500000001	Emx-Cre+;DGF/+	Emx-DG-Ctrl
1	SO	P15	DM222	-7.077509666666667	Emx-Cre+;DGF/+	Emx-DG-Ctrl
1	SO	P15	DM223	-55.126424	Emx-Cre+;DGF/+	Emx-DG-Ctrl
1	SO	P15	DM224	-45.015263	Emx-Cre+;DGF/+	Emx-DG-Ctrl
1	SO	P15	DM225	-48.206921	Emx-Cre+;DGF/+	Emx-DG-Ctrl
1	SO	P15	DM226	-41.08263733333334	Emx-Cre+;DGF/+	Emx-DG-Ctrl
1	SO	P15	DM227	-50.970237999999995	Emx-Cre+;DGF/+	Emx-DG-Ctrl
1	SO	P15	DM228	-116.25346566666667	Emx-Cre+;DGF/+	Emx-DG-Ctrl
1	SO	P15	DM229	-61.52652966666667	Emx-Cre+;DGF/+	Emx-DG-Ctrl
1	SO	P15	DM230	-41.36998966666667	Emx-Cre+;DGF/+	Emx-DG-Ctrl
1	SO	P15	DM231	-36.670725	Emx-Cre+;DGF/+	Emx-DG-Ctrl
1	SO	P15	DM232	-72.601343	Emx-Cre+;DGF/+	Emx-DG-Ctrl
1	SO	P15	DM233	-42.409973	Emx-Cre+;DGF/+	Emx-DG-Ctrl
1	SO	P15	DM234	-46.560654	Emx-Cre+;DGF/+	Emx-DG-Ctrl
1	SO	P15	DM235	-31.085173333333312	Emx-Cre+;DGF/+	Emx-DG-Ctrl
1	SO	P15	DM236	-39.28262466666666	Emx-Cre+;DGF/+	Emx-DG-Ctrl
1	SO	P15	DM237	-38.24609666666665	Emx-Cre+;DGF/+	Emx-DG-Ctrl
1	SO	P15	DM238	-41.191293	Emx-Cre+;DGF/+	Emx-DG-Ctrl
1	SO	P30	DM239	-155.03996766666668	Emx-Cre+;DGF/-	Emx-DG-cKO
1	SO	P30	DM240	-13.109369000000015	Emx-Cre+;DGF/-	Emx-DG-cKO
1	SO	P30	DM241	-127.25887900000002	Emx-Cre+;DGF/-	Emx-DG-cKO
1	SO	P30	DM242	-37.41137333333332	Emx-Cre+;DGF/-	Emx-DG-cKO
1	SO	P30	DM243	-114.72971599999998	Emx-Cre+;DGF/-	Emx-DG-cKO
1	SO	P30	DM244	-29.67307466666665	Emx-Cre+;DGF/-	Emx-DG-cKO
1	SO	P30	DM245	-60.362108666666664	Emx-Cre+;DGF/-	Emx-DG-cKO
1	SO	P30	DM246	-53.20044966666666	Emx-Cre+;DGF/-	Emx-DG-cKO
1	SO	P30	DM247	-47.11243933333333	Emx-Cre+;DGF/-	Emx-DG-cKO
1	SO	P30	DM248	-122.47882833333335	Emx-Cre+;DGF/-	Emx-DG-cKO
1	SO	P30	DM249	-113.38240299999997	Emx-Cre+;DGF/-	Emx-DG-cKO
1	SO	P30	DM250	277.0372796666667	Emx-Cre+;DGF/-	Emx-DG-cKO
1	SO	P30	DM251	22.129060666666664	Emx-Cre+;DGF/-	Emx-DG-cKO
1	SO	P30	DM252	-67.27083700000001	Emx-Cre+;DGF/-	Emx-DG-cKO
1	SO	P30	DM253	-54.69348499999999	Emx-Cre+;DGF/-	Emx-DG-cKO
1	SO	P30	DM254	72.0228123	Emx-Cre+;DGF/-	Emx-DG-cKO
1	SO	P30	DM255	-91.43615533333332	Emx-Cre+;DGF/-	Emx-DG-cKO
1	SO	P30	DM256	-73.74224266666666	Emx-Cre+;DGF/-	Emx-DG-cKO
1	SO	P30	DM257	-51.959456666666654	Emx-Cre+;DGF/-	Emx-DG-cKO
1	SO	P30	DM258	-18.778300333333334	Emx-Cre+;DGF/-	Emx-DG-cKO
1	SO	P30	DM259	10.715929666666682	Emx-Cre+;DGF/-	Emx-DG-cKO
1	SO	P30	DM260	-17.329115333333352	Emx-Cre+;DGF/-	Emx-DG-cKO
1	SO	P30	DM261	58.508851333333325	Emx-Cre+;DGF/-	Emx-DG-cKO
1	SO	P30	DM262	4.995415000000037	Emx-Cre+;DGF/-	Emx-DG-cKO
1	SO	P30	DM263	20.442528333333314	Emx-Cre+;DGF/-	Emx-DG-cKO
1	SO	P30	DM264	-20.186440999999984	Emx-Cre+;DGF/-	Emx-DG-cKO
1	SO	P30	DM265	25.31677933333333	Emx-Cre+;DGF/-	Emx-DG-cKO
1	SO	P30	DM266	121.52107166666667	Emx-Cre+;DGF/-	Emx-DG-cKO
1	SO	P30	DM267	7.605502000000001	Emx-Cre+;DGF/-	Emx-DG-cKO
1	SO	P30	DM268	54.83441566666668	Emx-Cre+;DGF/-	Emx-DG-cKO
1	SO	P30	DM269	-32.53520466666668	Emx-Cre+;DGF/-	Emx-DG-cKO
1	SO	P30	DM270	31.13747866666667	Emx-Cre+;DGF/-	Emx-DG-cKO
1	SO	P30	DM271	-6.594005	Emx-Cre+;DGF/-	Emx-DG-cKO
1	SO	P30	DM272	146.92685033333333	Emx-Cre+;DGF/-	Emx-DG-cKO
1	SO	P30	DM273	201.967385	Emx-Cre+;DGF/-	Emx-DG-cKO
1	SO	P30	DM274	-56.40498166666668	Emx-Cre+;DGF/-	Emx-DG-cKO
1	SO	P30	DM275	0.8049673333333089	Emx-Cre+;DGF/-	Emx-DG-cKO
1	SO	P30	DM276	70.29718166666667	Emx-Cre+;DGF/-	Emx-DG-cKO
1	SO	P30	DM277	-120.61767033333332	Emx-Cre+;DGF/-	Emx-DG-cKO
1	SO	P30	DM278	-112.303069	Emx-Cre+;DGF/+	Emx-DG-Ctrl
1	SO	P30	DM279	-58.20977733333334	Emx-Cre+;DGF/+	Emx-DG-Ctrl
1	SO	P30	DM280	-97.13517633333332	Emx-Cre+;DGF/+	Emx-DG-Ctrl
1	SO	P30	DM281	-61.937802999999995	Emx-Cre+;DGF/+	Emx-DG-Ctrl
1	SO	P30	DM282	-41.55661100000003	Emx-Cre+;DGF/+	Emx-DG-Ctrl
1	SO	P30	DM283	-106.13406533333331	Emx-Cre+;DGF/+	Emx-DG-Ctrl
1	SO	P30	DM284	-88.24026633333334	Emx-Cre+;DGF/+	Emx-DG-Ctrl
1	SO	P30	DM285	-80.22405866666666	Emx-Cre+;DGF/+	Emx-DG-Ctrl
1	SO	P30	DM286	-66.64721700000001	Emx-Cre+;DGF/+	Emx-DG-Ctrl
1	SO	P30	DM287	-66.65141533333332	Emx-Cre+;DGF/+	Emx-DG-Ctrl
1	SO	P30	DM288	-35.30521399999998	Emx-Cre+;DGF/+	Emx-DG-Ctrl
1	SO	P30	DM289	-115.23184033333332	Emx-Cre+;DGF/+	Emx-DG-Ctrl
1	SO	P30	DM290	1.6061996666666687	Emx-Cre+;DGF/+	Emx-DG-Ctrl
1	SO	P30	DM291	-65.70462966666669	Emx-Cre+;DGF/+	Emx-DG-Ctrl
1	SO	P30	DM292	-57.07978699999999	Emx-Cre+;DGF/+	Emx-DG-Ctrl
1	SO	P30	DM293	-77.72328333333336	Emx-Cre+;DGF/+	Emx-DG-Ctrl
1	SO	P30	DM294	-45.895399999999995	Emx-Cre+;DGF/+	Emx-DG-Ctrl
1	SO	P30	DM295	-59.946228	Emx-Cre+;DGF/+	Emx-DG-Ctrl
1	SO	P30	DM296	-85.19661533333333	Emx-Cre+;DGF/+	Emx-DG-Ctrl
1	SO	P30	DM297	-73.698986	Emx-Cre+;DGF/+	Emx-DG-Ctrl
1	SO	P30	DM298	-74.32807966666667	Emx-Cre+;DGF/+	Emx-DG-Ctrl
1	SO	P30	DM299	-46.43709666666667	Emx-Cre+;DGF/+	Emx-DG-Ctrl
1	SO	P30	DM300	-69.27302166666668	Emx-Cre+;DGF/+	Emx-DG-Ctrl
1	SO	P30	DM301	-53.1452716666667	Emx-Cre+;DGF/+	Emx-DG-Ctrl
1	SO	P30	DM302	-59.25044366666666	Emx-Cre+;DGF/+	Emx-DG-Ctrl
1	SO	P30	DM303	-90.67430966666666	Emx-Cre+;DGF/+	Emx-DG-Ctrl
1	SO	P30	DM304	-116.56208600000002	Emx-Cre+;DGF/+	Emx-DG-Ctrl
1	SO	P30	DM305	-37.08102100000002	Emx-Cre+;DGF/+	Emx-DG-Ctrl
1	SO	P30	DM306	-29.53060666666667	Emx-Cre+;DGF/+	Emx-DG-Ctrl
1	SO	P30	DM307	-82.51040933333333	Emx-Cre+;DGF/+	Emx-DG-Ctrl
1	SO	P30	DM308	-48.67744899999999	Emx-Cre+;DGF/+	Emx-DG-Ctrl
1	SO	P30	DM309	-93.08334766666668	Emx-Cre+;DGF/+	Emx-DG-Ctrl
1	SO	P30	DM310	-89.941621	Emx-Cre+;DGF/+	Emx-DG-Ctrl
1	SO	P30	DM311	-82.35088400000001	Emx-Cre+;DGF/+	Emx-DG-Ctrl
1	SO	P30	DM312	-88.56284433333333	Emx-Cre+;DGF/+	Emx-DG-Ctrl
1	SO	P30	DM313	-107.96818266666666	Emx-Cre+;DGF/+	Emx-DG-Ctrl
1	SO	P30	DM314	-102.66584266666666	Emx-Cre+;DGF/+	Emx-DG-Ctrl
1	SO	P30	DM315	-94.52005066666668	Emx-Cre+;DGF/+	Emx-DG-Ctrl
1	SO	P30	DM316	-73.87965466666668	Emx-Cre+;DGF/+	Emx-DG-Ctrl
1	SO	P30	DM317	-120.30222700000003	Emx-Cre+;DGF/+	Emx-DG-Ctrl
1	SO	P30	DM318	-51.85197866666666	Emx-Cre+;DGF/+	Emx-DG-Ctrl
1	SO	P30	DM319	-113.40695266666667	Emx-Cre+;DGF/+	Emx-DG-Ctrl
1	SO	P30	DM320	-109.41711600000002	Emx-Cre+;DGF/+	Emx-DG-Ctrl
1	SO	P30	DM321	-124.39859366666666	Emx-Cre+;DGF/+	Emx-DG-Ctrl
2	SO	P5	DM001	79.23081	Emx-Cre+;DGF/-	Emx-DG-cKO
2	SO	P5	DM002	79.86468866666668	Emx-Cre+;DGF/-	Emx-DG-cKO
2	SO	P5	DM003	61.236711333333325	Emx-Cre+;DGF/-	Emx-DG-cKO
2	SO	P5	DM004	44.11201479999999	Emx-Cre+;DGF/-	Emx-DG-cKO
2	SO	P5	DM005	70.07977533333333	Emx-Cre+;DGF/-	Emx-DG-cKO
2	SO	P5	DM006	31.458022666666665	Emx-Cre+;DGF/-	Emx-DG-cKO
2	SO	P5	DM007	35.21330869999999	Emx-Cre+;DGF/-	Emx-DG-cKO
2	SO	P5	DM008	30.579708666666665	Emx-Cre+;DGF/-	Emx-DG-cKO
2	SO	P5	DM009	31.542668666666668	Emx-Cre+;DGF/-	Emx-DG-cKO
2	SO	P5	DM010	55.343723000000004	Emx-Cre+;DGF/-	Emx-DG-cKO
2	SO	P5	DM011	41.256727566666676	Emx-Cre+;DGF/-	Emx-DG-cKO
2	SO	P5	DM012	25.803031000000004	Emx-Cre+;DGF/-	Emx-DG-cKO
2	SO	P5	DM013	85.315545	Emx-Cre+;DGF/-	Emx-DG-cKO
2	SO	P5	DM014	120.89109433333333	Emx-Cre+;DGF/-	Emx-DG-cKO
2	SO	P5	DM015	103.89849066666665	Emx-Cre+;DGF/-	Emx-DG-cKO
2	SO	P5	DM016	65.01980133333333	Emx-Cre+;DGF/-	Emx-DG-cKO
2	SO	P5	DM017	104.18177566666667	Emx-Cre+;DGF/-	Emx-DG-cKO
2	SO	P5	DM018	90.26184533333334	Emx-Cre+;DGF/-	Emx-DG-cKO
2	SO	P5	DM019	118.05026833333335	Emx-Cre+;DGF/-	Emx-DG-cKO
2	SO	P5	DM020	34.52377733333333	Emx-Cre+;DGF/-	Emx-DG-cKO
2	SO	P5	DM021	63.58951866666666	Emx-Cre+;DGF/-	Emx-DG-cKO
2	SO	P5	DM022	48.75112966666668	Emx-Cre+;DGF/-	Emx-DG-cKO
2	SO	P5	DM023	82.71339400000001	Emx-Cre+;DGF/-	Emx-DG-cKO
2	SO	P5	DM024	41.735001333333315	Emx-Cre+;DGF/-	Emx-DG-cKO
2	SO	P5	DM025	113.88858066666664	Emx-Cre+;DGF/-	Emx-DG-cKO
2	SO	P5	DM026	166.905372	Emx-Cre+;DGF/-	Emx-DG-cKO
2	SO	P5	DM027	111.09673433333332	Emx-Cre+;DGF/-	Emx-DG-cKO
2	SO	P5	DM028	114.68349233333332	Emx-Cre+;DGF/-	Emx-DG-cKO
2	SO	P5	DM029	89.95268233333333	Emx-Cre+;DGF/-	Emx-DG-cKO
2	SO	P5	DM030	39.580443	Emx-Cre+;DGF/-	Emx-DG-cKO
2	SO	P5	DM031	151.63615199999998	Emx-Cre+;DGF/-	Emx-DG-cKO
2	SO	P5	DM032	9.686502833333327	Emx-Cre+;DGF/-	Emx-DG-cKO
2	SO	P5	DM033	164.05653666666666	Emx-Cre+;DGF/-	Emx-DG-cKO
2	SO	P5	DM034	108.43745466666665	Emx-Cre+;DGF/-	Emx-DG-cKO
2	SO	P5	DM035	133.47550733333335	Emx-Cre+;DGF/-	Emx-DG-cKO
2	SO	P5	DM036	68.1050246666667	Emx-Cre+;DGF/-	Emx-DG-cKO
2	SO	P5	DM037	157.207669	Emx-Cre+;DGF/-	Emx-DG-cKO
2	SO	P5	DM038	126.53662333333334	Emx-Cre+;DGF/-	Emx-DG-cKO
2	SO	P5	DM039	104.991687	Emx-Cre+;DGF/-	Emx-DG-cKO
2	SO	P5	DM040	53.928001333333334	Emx-Cre+;DGF/-	Emx-DG-cKO
2	SO	P5	DM041	22.050709666666666	Emx-Cre+;DGF/-	Emx-DG-cKO
2	SO	P5	DM042	30.36022966666666	Emx-Cre+;DGF/-	Emx-DG-cKO
2	SO	P5	DM043	23.201007333333337	Emx-Cre+;DGF/-	Emx-DG-cKO
2	SO	P5	DM044	-32.34036733333334	Emx-Cre+;DGF/+	Emx-DG-Ctrl
2	SO	P5	DM045	-8.443028666666654	Emx-Cre+;DGF/+	Emx-DG-Ctrl
2	SO	P5	DM046	21.565760333333333	Emx-Cre+;DGF/+	Emx-DG-Ctrl
2	SO	P5	DM047	31.61310333333334	Emx-Cre+;DGF/+	Emx-DG-Ctrl
2	SO	P5	DM048	25.003707666666667	Emx-Cre+;DGF/+	Emx-DG-Ctrl
2	SO	P5	DM049	8.453098666666676	Emx-Cre+;DGF/+	Emx-DG-Ctrl
2	SO	P5	DM050	-20.099667999999998	Emx-Cre+;DGF/+	Emx-DG-Ctrl
2	SO	P5	DM051	-23.18022866666666	Emx-Cre+;DGF/+	Emx-DG-Ctrl
2	SO	P5	DM052	36.08409933333331	Emx-Cre+;DGF/+	Emx-DG-Ctrl
2	SO	P5	DM053	18.368812333333324	Emx-Cre+;DGF/+	Emx-DG-Ctrl
2	SO	P5	DM054	33.94891233333333	Emx-Cre+;DGF/+	Emx-DG-Ctrl
2	SO	P5	DM055	46.86022066666666	Emx-Cre+;DGF/+	Emx-DG-Ctrl
2	SO	P5	DM056	26.916028333333344	Emx-Cre+;DGF/+	Emx-DG-Ctrl
2	SO	P5	DM057	53.303801000000014	Emx-Cre+;DGF/+	Emx-DG-Ctrl
2	SO	P5	DM058	24.096102333333345	Emx-Cre+;DGF/+	Emx-DG-Ctrl
2	SO	P5	DM059	83.35974766666665	Emx-Cre+;DGF/+	Emx-DG-Ctrl
2	SO	P5	DM060	48.27508166666666	Emx-Cre+;DGF/+	Emx-DG-Ctrl
2	SO	P5	DM061	33.38415666666668	Emx-Cre+;DGF/+	Emx-DG-Ctrl
2	SO	P5	DM062	19.178603333333342	Emx-Cre+;DGF/+	Emx-DG-Ctrl
2	SO	P5	DM063	-6.484775333333327	Emx-Cre+;DGF/+	Emx-DG-Ctrl
2	SO	P5	DM064	16.812056333333327	Emx-Cre+;DGF/+	Emx-DG-Ctrl
2	SO	P5	DM065	25.716338666666672	Emx-Cre+;DGF/+	Emx-DG-Ctrl
2	SO	P5	DM066	15.158513999999997	Emx-Cre+;DGF/+	Emx-DG-Ctrl
2	SO	P5	DM067	55.32150600000001	Emx-Cre+;DGF/+	Emx-DG-Ctrl
2	SO	P5	DM068	66.35018333333333	Emx-Cre+;DGF/+	Emx-DG-Ctrl
2	SO	P5	DM069	71.616451	Emx-Cre+;DGF/+	Emx-DG-Ctrl
2	SO	P5	DM070	3.6281203333333374	Emx-Cre+;DGF/+	Emx-DG-Ctrl
2	SO	P5	DM071	13.856996	Emx-Cre+;DGF/+	Emx-DG-Ctrl
2	SO	P5	DM072	9.225976000000003	Emx-Cre+;DGF/+	Emx-DG-Ctrl
2	SO	P5	DM073	-11.949824999999995	Emx-Cre+;DGF/+	Emx-DG-Ctrl
2	SO	P5	DM074	26.59345266666668	Emx-Cre+;DGF/+	Emx-DG-Ctrl
2	SO	P5	DM075	48.36586433333334	Emx-Cre+;DGF/+	Emx-DG-Ctrl
-18	SO	P10	DM076	238.69859100000002	Emx-Cre+;DGF/-	Emx-DG-cKO
-18	SO	P10	DM077	111.46846900000001	Emx-Cre+;DGF/-	Emx-DG-cKO
-18	SO	P10	DM078	97.919557	Emx-Cre+;DGF/-	Emx-DG-cKO
-18	SO	P10	DM079	81.51112833333333	Emx-Cre+;DGF/-	Emx-DG-cKO
-18	SO	P10	DM080	93.79718766666666	Emx-Cre+;DGF/-	Emx-DG-cKO
-18	SO	P10	DM081	78.17527866666667	Emx-Cre+;DGF/-	Emx-DG-cKO
-18	SO	P10	DM082	96.37365299999998	Emx-Cre+;DGF/-	Emx-DG-cKO
-18	SO	P10	DM083	82.12868300000001	Emx-Cre+;DGF/-	Emx-DG-cKO
-18	SO	P10	DM084	100.25933833333333	Emx-Cre+;DGF/-	Emx-DG-cKO
-18	SO	P10	DM085	66.06318466666666	Emx-Cre+;DGF/-	Emx-DG-cKO
-18	SO	P10	DM086	77.566418	Emx-Cre+;DGF/-	Emx-DG-cKO
-18	SO	P10	DM087	32.35022299999999	Emx-Cre+;DGF/-	Emx-DG-cKO
-18	SO	P10	DM088	85.35508466666666	Emx-Cre+;DGF/-	Emx-DG-cKO
-18	SO	P10	DM089	44.15443799999999	Emx-Cre+;DGF/-	Emx-DG-cKO
-18	SO	P10	DM090	77.45259366666669	Emx-Cre+;DGF/-	Emx-DG-cKO
-18	SO	P10	DM091	-22.406307999999985	Emx-Cre+;DGF/-	Emx-DG-cKO
-18	SO	P10	DM092	78.33821199999998	Emx-Cre+;DGF/-	Emx-DG-cKO
-18	SO	P10	DM093	-43.46461266666668	Emx-Cre+;DGF/-	Emx-DG-cKO
-18	SO	P10	DM094	41.15613333333332	Emx-Cre+;DGF/-	Emx-DG-cKO
-18	SO	P10	DM095	32.91305900000001	Emx-Cre+;DGF/-	Emx-DG-cKO
-18	SO	P10	DM096	30.178599333333334	Emx-Cre+;DGF/-	Emx-DG-cKO
-18	SO	P10	DM097	27.778980333333323	Emx-Cre+;DGF/-	Emx-DG-cKO
-18	SO	P10	DM098	128.36958133333334	Emx-Cre+;DGF/-	Emx-DG-cKO
-18	SO	P10	DM099	-29.734514	Emx-Cre+;DGF/-	Emx-DG-cKO
-18	SO	P10	DM100	41.38703833333332	Emx-Cre+;DGF/-	Emx-DG-cKO
-18	SO	P10	DM101	-23.072708999999993	Emx-Cre+;DGF/-	Emx-DG-cKO
-18	SO	P10	DM102	-7.405430000000005	Emx-Cre+;DGF/-	Emx-DG-cKO
-18	SO	P10	DM103	37.664385	Emx-Cre+;DGF/-	Emx-DG-cKO
-18	SO	P10	DM104	80.80695766666668	Emx-Cre+;DGF/-	Emx-DG-cKO
-18	SO	P10	DM105	36.95068600000001	Emx-Cre+;DGF/-	Emx-DG-cKO
-18	SO	P10	DM106	51.75742633333332	Emx-Cre+;DGF/-	Emx-DG-cKO
-18	SO	P10	DM107	4.144925333333333	Emx-Cre+;DGF/-	Emx-DG-cKO
-18	SO	P10	DM108	30.533633666666663	Emx-Cre+;DGF/-	Emx-DG-cKO
-18	SO	P10	DM109	-53.41634200000001	Emx-Cre+;DGF/-	Emx-DG-cKO
-18	SO	P10	DM110	43.16636066666666	Emx-Cre+;DGF/-	Emx-DG-cKO
-18	SO	P10	DM111	51.002029666666665	Emx-Cre+;DGF/-	Emx-DG-cKO
-18	SO	P10	DM112	148.04665200000002	Emx-Cre+;DGF/-	Emx-DG-cKO
-18	SO	P10	DM113	48.679265333333326	Emx-Cre+;DGF/-	Emx-DG-cKO
-18	SO	P10	DM114	-19.31571100000001	Emx-Cre+;DGF/-	Emx-DG-cKO
-18	SO	P10	DM115	26.155552666666665	Emx-Cre+;DGF/-	Emx-DG-cKO
-18	SO	P10	DM116	4.918633666666675	Emx-Cre+;DGF/-	Emx-DG-cKO
-18	SO	P10	DM117	37.16973066666667	Emx-Cre+;DGF/-	Emx-DG-cKO
-18	SO	P10	DM118	11.954093333333324	Emx-Cre+;DGF/-	Emx-DG-cKO
-18	SO	P10	DM119	8.387517666666668	Emx-Cre+;DGF/-	Emx-DG-cKO
-18	SO	P10	DM120	1.494889333333333	Emx-Cre+;DGF/+	Emx-DG-Ctrl
-18	SO	P10	DM121	-44.73187999999999	Emx-Cre+;DGF/+	Emx-DG-Ctrl
-18	SO	P10	DM122	-48.49986933333333	Emx-Cre+;DGF/+	Emx-DG-Ctrl
-18	SO	P10	DM123	-37.11523900000001	Emx-Cre+;DGF/+	Emx-DG-Ctrl
-18	SO	P10	DM124	-56.356760666666666	Emx-Cre+;DGF/+	Emx-DG-Ctrl
-18	SO	P10	DM125	-6.105765666666656	Emx-Cre+;DGF/+	Emx-DG-Ctrl
-18	SO	P10	DM126	-48.30547566666666	Emx-Cre+;DGF/+	Emx-DG-Ctrl
-18	SO	P10	DM127	-16.288684333333322	Emx-Cre+;DGF/+	Emx-DG-Ctrl
-18	SO	P10	DM128	-42.119252999999986	Emx-Cre+;DGF/+	Emx-DG-Ctrl
-18	SO	P10	DM129	-36.786838666666654	Emx-Cre+;DGF/+	Emx-DG-Ctrl
-18	SO	P10	DM130	-36.247836666666664	Emx-Cre+;DGF/+	Emx-DG-Ctrl
-18	SO	P10	DM131	-33.90923766666666	Emx-Cre+;DGF/+	Emx-DG-Ctrl
-18	SO	P10	DM132	-81.889606	Emx-Cre+;DGF/+	Emx-DG-Ctrl
-18	SO	P10	DM133	-25.04741333333334	Emx-Cre+;DGF/+	Emx-DG-Ctrl
-18	SO	P10	DM134	-28.047926000000007	Emx-Cre+;DGF/+	Emx-DG-Ctrl
-18	SO	P10	DM135	-15.945668000000012	Emx-Cre+;DGF/+	Emx-DG-Ctrl
-18	SO	P10	DM136	-38.009860999999994	Emx-Cre+;DGF/+	Emx-DG-Ctrl
-18	SO	P10	DM137	-26.918056666666672	Emx-Cre+;DGF/+	Emx-DG-Ctrl
-18	SO	P10	DM138	-21.374654999999994	Emx-Cre+;DGF/+	Emx-DG-Ctrl
-18	SO	P10	DM139	-14.018356666666676	Emx-Cre+;DGF/+	Emx-DG-Ctrl
-18	SO	P10	DM140	-42.58984233333333	Emx-Cre+;DGF/+	Emx-DG-Ctrl
-18	SO	P10	DM141	-64.79061533333335	Emx-Cre+;DGF/+	Emx-DG-Ctrl
-18	SO	P10	DM142	-48.99390133333334	Emx-Cre+;DGF/+	Emx-DG-Ctrl
-18	SO	P10	DM143	-37.455851	Emx-Cre+;DGF/+	Emx-DG-Ctrl
-18	SO	P10	DM144	-14.544781999999998	Emx-Cre+;DGF/+	Emx-DG-Ctrl
-18	SO	P10	DM145	-17.45161433333333	Emx-Cre+;DGF/+	Emx-DG-Ctrl
-18	SO	P10	DM146	-46.595207666666674	Emx-Cre+;DGF/+	Emx-DG-Ctrl
-18	SO	P10	DM147	-40.191138	Emx-Cre+;DGF/+	Emx-DG-Ctrl
-18	SO	P10	DM148	-49.80951133333333	Emx-Cre+;DGF/+	Emx-DG-Ctrl
-18	SO	P10	DM149	-34.246972333333325	Emx-Cre+;DGF/+	Emx-DG-Ctrl
2	SO	P15	DM150	-26.396202666666664	Emx-Cre+;DGF/-	Emx-DG-cKO
2	SO	P15	DM151	-9.454404666666685	Emx-Cre+;DGF/-	Emx-DG-cKO
2	SO	P15	DM152	1.9529753333333417	Emx-Cre+;DGF/-	Emx-DG-cKO
2	SO	P15	DM153	-18.271853666666672	Emx-Cre+;DGF/-	Emx-DG-cKO
2	SO	P15	DM154	-5.378962666666657	Emx-Cre+;DGF/-	Emx-DG-cKO
2	SO	P15	DM155	-22.560693999999998	Emx-Cre+;DGF/-	Emx-DG-cKO
2	SO	P15	DM156	-12.414373333333339	Emx-Cre+;DGF/-	Emx-DG-cKO
2	SO	P15	DM157	5.263253666666685	Emx-Cre+;DGF/-	Emx-DG-cKO
2	SO	P15	DM158	3.714062333333326	Emx-Cre+;DGF/-	Emx-DG-cKO
2	SO	P15	DM159	-8.531762666666665	Emx-Cre+;DGF/-	Emx-DG-cKO
2	SO	P15	DM160	-0.7504653333333428	Emx-Cre+;DGF/-	Emx-DG-cKO
2	SO	P15	DM161	-32.68089999999999	Emx-Cre+;DGF/-	Emx-DG-cKO
2	SO	P15	DM162	-7.819790666666667	Emx-Cre+;DGF/-	Emx-DG-cKO
2	SO	P15	DM163	-12.634543666666664	Emx-Cre+;DGF/-	Emx-DG-cKO
2	SO	P15	DM164	-8.400885999999995	Emx-Cre+;DGF/-	Emx-DG-cKO
2	SO	P15	DM165	2.556821999999992	Emx-Cre+;DGF/-	Emx-DG-cKO
2	SO	P15	DM166	15.356723666666662	Emx-Cre+;DGF/-	Emx-DG-cKO
2	SO	P15	DM167	-33.77782633333334	Emx-Cre+;DGF/-	Emx-DG-cKO
2	SO	P15	DM168	-9.06742433333333	Emx-Cre+;DGF/-	Emx-DG-cKO
2	SO	P15	DM169	32.20551833333334	Emx-Cre+;DGF/-	Emx-DG-cKO
2	SO	P15	DM170	-21.949449666666663	Emx-Cre+;DGF/-	Emx-DG-cKO
2	SO	P15	DM171	-24.715910666666662	Emx-Cre+;DGF/-	Emx-DG-cKO
2	SO	P15	DM172	-13.691427333333332	Emx-Cre+;DGF/-	Emx-DG-cKO
2	SO	P15	DM173	17.642073333333343	Emx-Cre+;DGF/-	Emx-DG-cKO
2	SO	P15	DM174	48.13916666666663	Emx-Cre+;DGF/-	Emx-DG-cKO
2	SO	P15	DM175	14.036390666666676	Emx-Cre+;DGF/-	Emx-DG-cKO
2	SO	P15	DM176	-3.969840333333328	Emx-Cre+;DGF/-	Emx-DG-cKO
2	SO	P15	DM177	63.710556999999994	Emx-Cre+;DGF/-	Emx-DG-cKO
2	SO	P15	DM178	-29.71359233333335	Emx-Cre+;DGF/-	Emx-DG-cKO
2	SO	P15	DM179	7.0540486666666595	Emx-Cre+;DGF/-	Emx-DG-cKO
2	SO	P15	DM180	2.245302333333342	Emx-Cre+;DGF/-	Emx-DG-cKO
2	SO	P15	DM181	-18.46354633333335	Emx-Cre+;DGF/-	Emx-DG-cKO
2	SO	P15	DM182	25.381887999999993	Emx-Cre+;DGF/-	Emx-DG-cKO
2	SO	P15	DM183	2.375269333333345	Emx-Cre+;DGF/-	Emx-DG-cKO
2	SO	P15	DM184	9.316821000000004	Emx-Cre+;DGF/-	Emx-DG-cKO
2	SO	P15	DM185	-39.820872666666666	Emx-Cre+;DGF/-	Emx-DG-cKO
2	SO	P15	DM186	-32.02669600000001	Emx-Cre+;DGF/-	Emx-DG-cKO
2	SO	P15	DM187	-1.203909666666675	Emx-Cre+;DGF/-	Emx-DG-cKO
2	SO	P15	DM188	-14.401677999999995	Emx-Cre+;DGF/-	Emx-DG-cKO
2	SO	P15	DM189	-32.65359433333334	Emx-Cre+;DGF/-	Emx-DG-cKO
2	SO	P15	DM190	-39.356379000000004	Emx-Cre+;DGF/-	Emx-DG-cKO
2	SO	P15	DM191	-6.258242000000005	Emx-Cre+;DGF/-	Emx-DG-cKO
2	SO	P15	DM192	-26.56521533333333	Emx-Cre+;DGF/-	Emx-DG-cKO
2	SO	P15	DM193	-0.42445699999999914	Emx-Cre+;DGF/-	Emx-DG-cKO
2	SO	P15	DM194	-19.82250266666667	Emx-Cre+;DGF/+	Emx-DG-Ctrl
2	SO	P15	DM195	-19.771738999999986	Emx-Cre+;DGF/+	Emx-DG-Ctrl
2	SO	P15	DM196	-28.146524666666664	Emx-Cre+;DGF/+	Emx-DG-Ctrl
2	SO	P15	DM197	-48.47455633333333	Emx-Cre+;DGF/+	Emx-DG-Ctrl
2	SO	P15	DM198	-39.01828866666667	Emx-Cre+;DGF/+	Emx-DG-Ctrl
2	SO	P15	DM199	-10.290081333333328	Emx-Cre+;DGF/+	Emx-DG-Ctrl
2	SO	P15	DM200	-24.983514999999993	Emx-Cre+;DGF/+	Emx-DG-Ctrl
2	SO	P15	DM201	-46.29746766666667	Emx-Cre+;DGF/+	Emx-DG-Ctrl
2	SO	P15	DM202	-37.431443333333334	Emx-Cre+;DGF/+	Emx-DG-Ctrl
2	SO	P15	DM203	-33.799490000000006	Emx-Cre+;DGF/+	Emx-DG-Ctrl
2	SO	P15	DM204	-47.08879466666667	Emx-Cre+;DGF/+	Emx-DG-Ctrl
2	SO	P15	DM205	-66.31341133333335	Emx-Cre+;DGF/+	Emx-DG-Ctrl
2	SO	P15	DM206	22.112827	Emx-Cre+;DGF/+	Emx-DG-Ctrl
2	SO	P15	DM207	-56.676835000000004	Emx-Cre+;DGF/+	Emx-DG-Ctrl
2	SO	P15	DM208	-28.758150333333344	Emx-Cre+;DGF/+	Emx-DG-Ctrl
2	SO	P15	DM209	-34.603969	Emx-Cre+;DGF/+	Emx-DG-Ctrl
2	SO	P15	DM210	-27.60147633333334	Emx-Cre+;DGF/+	Emx-DG-Ctrl
2	SO	P15	DM211	-21.704170333333337	Emx-Cre+;DGF/+	Emx-DG-Ctrl
2	SO	P15	DM212	-30.764024000000006	Emx-Cre+;DGF/+	Emx-DG-Ctrl
2	SO	P15	DM213	-53.122324666666664	Emx-Cre+;DGF/+	Emx-DG-Ctrl
2	SO	P15	DM214	-76.71085933333333	Emx-Cre+;DGF/+	Emx-DG-Ctrl
2	SO	P15	DM215	-60.82604666666666	Emx-Cre+;DGF/+	Emx-DG-Ctrl
2	SO	P15	DM216	-34.31695766666665	Emx-Cre+;DGF/+	Emx-DG-Ctrl
2	SO	P15	DM217	-56.14636800000002	Emx-Cre+;DGF/+	Emx-DG-Ctrl
2	SO	P15	DM218	-64.81967566666667	Emx-Cre+;DGF/+	Emx-DG-Ctrl
2	SO	P15	DM219	-4.106495000000014	Emx-Cre+;DGF/+	Emx-DG-Ctrl
2	SO	P15	DM220	-18.743202666666672	Emx-Cre+;DGF/+	Emx-DG-Ctrl
2	SO	P15	DM221	-23.448815000000007	Emx-Cre+;DGF/+	Emx-DG-Ctrl
2	SO	P15	DM222	-2.424742999999997	Emx-Cre+;DGF/+	Emx-DG-Ctrl
2	SO	P15	DM223	-41.35744066666667	Emx-Cre+;DGF/+	Emx-DG-Ctrl
2	SO	P15	DM224	-36.17779633333333	Emx-Cre+;DGF/+	Emx-DG-Ctrl
2	SO	P15	DM225	-42.29955433333334	Emx-Cre+;DGF/+	Emx-DG-Ctrl
2	SO	P15	DM226	-35.28760400000001	Emx-Cre+;DGF/+	Emx-DG-Ctrl
2	SO	P15	DM227	-44.46445466666666	Emx-Cre+;DGF/+	Emx-DG-Ctrl
2	SO	P15	DM228	-112.44143233333334	Emx-Cre+;DGF/+	Emx-DG-Ctrl
2	SO	P15	DM229	-57.94139633333334	Emx-Cre+;DGF/+	Emx-DG-Ctrl
2	SO	P15	DM230	-45.76928966666667	Emx-Cre+;DGF/+	Emx-DG-Ctrl
2	SO	P15	DM231	-33.985475	Emx-Cre+;DGF/+	Emx-DG-Ctrl
2	SO	P15	DM232	-66.58070966666666	Emx-Cre+;DGF/+	Emx-DG-Ctrl
2	SO	P15	DM233	-30.425039666666674	Emx-Cre+;DGF/+	Emx-DG-Ctrl
2	SO	P15	DM234	-44.874520666666676	Emx-Cre+;DGF/+	Emx-DG-Ctrl
2	SO	P15	DM235	-30.25703999999998	Emx-Cre+;DGF/+	Emx-DG-Ctrl
2	SO	P15	DM236	-35.891957999999995	Emx-Cre+;DGF/+	Emx-DG-Ctrl
2	SO	P15	DM237	-37.539379999999994	Emx-Cre+;DGF/+	Emx-DG-Ctrl
2	SO	P15	DM238	-29.55130966666667	Emx-Cre+;DGF/+	Emx-DG-Ctrl
2	SO	P30	DM239	-137.518751	Emx-Cre+;DGF/-	Emx-DG-cKO
2	SO	P30	DM240	-4.398435666666671	Emx-Cre+;DGF/-	Emx-DG-cKO
2	SO	P30	DM241	-104.870829	Emx-Cre+;DGF/-	Emx-DG-cKO
2	SO	P30	DM242	-6.868806666666671	Emx-Cre+;DGF/-	Emx-DG-cKO
2	SO	P30	DM243	-64.77779933333333	Emx-Cre+;DGF/-	Emx-DG-cKO
2	SO	P30	DM244	-37.596174666666684	Emx-Cre+;DGF/-	Emx-DG-cKO
2	SO	P30	DM245	-41.376292	Emx-Cre+;DGF/-	Emx-DG-cKO
2	SO	P30	DM246	-48.143416333333356	Emx-Cre+;DGF/-	Emx-DG-cKO
2	SO	P30	DM247	-33.89298933333333	Emx-Cre+;DGF/-	Emx-DG-cKO
2	SO	P30	DM248	-76.97147833333334	Emx-Cre+;DGF/-	Emx-DG-cKO
2	SO	P30	DM249	-83.57486966666663	Emx-Cre+;DGF/-	Emx-DG-cKO
2	SO	P30	DM250	276.9522963333333	Emx-Cre+;DGF/-	Emx-DG-cKO
2	SO	P30	DM251	39.91404399999997	Emx-Cre+;DGF/-	Emx-DG-cKO
2	SO	P30	DM252	-58.655953666666655	Emx-Cre+;DGF/-	Emx-DG-cKO
2	SO	P30	DM253	-36.505035	Emx-Cre+;DGF/-	Emx-DG-cKO
2	SO	P30	DM254	87.24250396666666	Emx-Cre+;DGF/-	Emx-DG-cKO
2	SO	P30	DM255	-56.10358866666667	Emx-Cre+;DGF/-	Emx-DG-cKO
2	SO	P30	DM256	-67.89109266666667	Emx-Cre+;DGF/-	Emx-DG-cKO
2	SO	P30	DM257	-37.87882333333332	Emx-Cre+;DGF/-	Emx-DG-cKO
2	SO	P30	DM258	-14.755583666666686	Emx-Cre+;DGF/-	Emx-DG-cKO
2	SO	P30	DM259	5.6964463333333315	Emx-Cre+;DGF/-	Emx-DG-cKO
2	SO	P30	DM260	7.315367999999978	Emx-Cre+;DGF/-	Emx-DG-cKO
2	SO	P30	DM261	40.42560133333334	Emx-Cre+;DGF/-	Emx-DG-cKO
2	SO	P30	DM262	12.42796500000001	Emx-Cre+;DGF/-	Emx-DG-cKO
2	SO	P30	DM263	31.81927833333329	Emx-Cre+;DGF/-	Emx-DG-cKO
2	SO	P30	DM264	-2.544990999999982	Emx-Cre+;DGF/-	Emx-DG-cKO
2	SO	P30	DM265	-2.5464873333333267	Emx-Cre+;DGF/-	Emx-DG-cKO
2	SO	P30	DM266	141.44178833333334	Emx-Cre+;DGF/-	Emx-DG-cKO
2	SO	P30	DM267	20.48746866666666	Emx-Cre+;DGF/-	Emx-DG-cKO
2	SO	P30	DM268	49.74056566666667	Emx-Cre+;DGF/-	Emx-DG-cKO
2	SO	P30	DM269	-35.38780466666668	Emx-Cre+;DGF/-	Emx-DG-cKO
2	SO	P30	DM270	39.293078666666666	Emx-Cre+;DGF/-	Emx-DG-cKO
2	SO	P30	DM271	2.83039500000001	Emx-Cre+;DGF/-	Emx-DG-cKO
2	SO	P30	DM272	128.23441699999998	Emx-Cre+;DGF/-	Emx-DG-cKO
2	SO	P30	DM273	132.49626833333332	Emx-Cre+;DGF/-	Emx-DG-cKO
2	SO	P30	DM274	-37.60271500000001	Emx-Cre+;DGF/-	Emx-DG-cKO
2	SO	P30	DM275	-1.2470993333333429	Emx-Cre+;DGF/-	Emx-DG-cKO
2	SO	P30	DM276	59.203765	Emx-Cre+;DGF/-	Emx-DG-cKO
2	SO	P30	DM277	-111.44510366666667	Emx-Cre+;DGF/-	Emx-DG-cKO
2	SO	P30	DM278	-102.49773566666666	Emx-Cre+;DGF/+	Emx-DG-Ctrl
2	SO	P30	DM279	-40.24232733333334	Emx-Cre+;DGF/+	Emx-DG-Ctrl
2	SO	P30	DM280	-98.39312633333333	Emx-Cre+;DGF/+	Emx-DG-Ctrl
2	SO	P30	DM281	-43.30593633333333	Emx-Cre+;DGF/+	Emx-DG-Ctrl
2	SO	P30	DM282	-29.961911000000004	Emx-Cre+;DGF/+	Emx-DG-Ctrl
2	SO	P30	DM283	-101.15781533333335	Emx-Cre+;DGF/+	Emx-DG-Ctrl
2	SO	P30	DM284	-81.48859966666667	Emx-Cre+;DGF/+	Emx-DG-Ctrl
2	SO	P30	DM285	-64.61314200000002	Emx-Cre+;DGF/+	Emx-DG-Ctrl
2	SO	P30	DM286	-58.19833366666668	Emx-Cre+;DGF/+	Emx-DG-Ctrl
2	SO	P30	DM287	-58.67524866666665	Emx-Cre+;DGF/+	Emx-DG-Ctrl
2	SO	P30	DM288	-36.36968066666666	Emx-Cre+;DGF/+	Emx-DG-Ctrl
2	SO	P30	DM289	-115.89967366666669	Emx-Cre+;DGF/+	Emx-DG-Ctrl
2	SO	P30	DM290	12.421583000000018	Emx-Cre+;DGF/+	Emx-DG-Ctrl
2	SO	P30	DM291	-58.778713	Emx-Cre+;DGF/+	Emx-DG-Ctrl
2	SO	P30	DM292	-36.286187000000005	Emx-Cre+;DGF/+	Emx-DG-Ctrl
2	SO	P30	DM293	-61.809883333333346	Emx-Cre+;DGF/+	Emx-DG-Ctrl
2	SO	P30	DM294	-39.01308333333335	Emx-Cre+;DGF/+	Emx-DG-Ctrl
2	SO	P30	DM295	-63.50264466666666	Emx-Cre+;DGF/+	Emx-DG-Ctrl
2	SO	P30	DM296	-84.162982	Emx-Cre+;DGF/+	Emx-DG-Ctrl
2	SO	P30	DM297	-61.892752666666674	Emx-Cre+;DGF/+	Emx-DG-Ctrl
2	SO	P30	DM298	-73.76697966666666	Emx-Cre+;DGF/+	Emx-DG-Ctrl
2	SO	P30	DM299	-32.259013333333336	Emx-Cre+;DGF/+	Emx-DG-Ctrl
2	SO	P30	DM300	-64.54137166666665	Emx-Cre+;DGF/+	Emx-DG-Ctrl
2	SO	P30	DM301	-55.66013833333333	Emx-Cre+;DGF/+	Emx-DG-Ctrl
2	SO	P30	DM302	-45.54167699999999	Emx-Cre+;DGF/+	Emx-DG-Ctrl
2	SO	P30	DM303	-94.73967633333335	Emx-Cre+;DGF/+	Emx-DG-Ctrl
2	SO	P30	DM304	-114.7118026666667	Emx-Cre+;DGF/+	Emx-DG-Ctrl
2	SO	P30	DM305	-24.45010433333336	Emx-Cre+;DGF/+	Emx-DG-Ctrl
2	SO	P30	DM306	-26.196656666666673	Emx-Cre+;DGF/+	Emx-DG-Ctrl
2	SO	P30	DM307	-74.72975933333335	Emx-Cre+;DGF/+	Emx-DG-Ctrl
2	SO	P30	DM308	-47.862865666666686	Emx-Cre+;DGF/+	Emx-DG-Ctrl
2	SO	P30	DM309	-95.68074766666668	Emx-Cre+;DGF/+	Emx-DG-Ctrl
2	SO	P30	DM310	-85.92747100000001	Emx-Cre+;DGF/+	Emx-DG-Ctrl
2	SO	P30	DM311	-77.89015066666667	Emx-Cre+;DGF/+	Emx-DG-Ctrl
2	SO	P30	DM312	-82.30632766666669	Emx-Cre+;DGF/+	Emx-DG-Ctrl
2	SO	P30	DM313	-105.54964933333333	Emx-Cre+;DGF/+	Emx-DG-Ctrl
2	SO	P30	DM314	-94.368976	Emx-Cre+;DGF/+	Emx-DG-Ctrl
2	SO	P30	DM315	-97.00478399999999	Emx-Cre+;DGF/+	Emx-DG-Ctrl
2	SO	P30	DM316	-61.83890466666668	Emx-Cre+;DGF/+	Emx-DG-Ctrl
2	SO	P30	DM317	-102.21314366666668	Emx-Cre+;DGF/+	Emx-DG-Ctrl
2	SO	P30	DM318	-53.97122866666668	Emx-Cre+;DGF/+	Emx-DG-Ctrl
2	SO	P30	DM319	-103.85585266666665	Emx-Cre+;DGF/+	Emx-DG-Ctrl
2	SO	P30	DM320	-90.668266	Emx-Cre+;DGF/+	Emx-DG-Ctrl
2	SO	P30	DM321	-113.54206033333334	Emx-Cre+;DGF/+	Emx-DG-Ctrl
3	SO	P5	DM001	88.57180999999999	Emx-Cre+;DGF/-	Emx-DG-cKO
3	SO	P5	DM002	76.53485533333334	Emx-Cre+;DGF/-	Emx-DG-cKO
3	SO	P5	DM003	65.75121133333332	Emx-Cre+;DGF/-	Emx-DG-cKO
3	SO	P5	DM004	39.319598133333336	Emx-Cre+;DGF/-	Emx-DG-cKO
3	SO	P5	DM005	67.12410866666667	Emx-Cre+;DGF/-	Emx-DG-cKO
3	SO	P5	DM006	35.25737266666667	Emx-Cre+;DGF/-	Emx-DG-cKO
3	SO	P5	DM007	39.616467033333336	Emx-Cre+;DGF/-	Emx-DG-cKO
3	SO	P5	DM008	32.297208666666656	Emx-Cre+;DGF/-	Emx-DG-cKO
3	SO	P5	DM009	40.97952700000001	Emx-Cre+;DGF/-	Emx-DG-cKO
3	SO	P5	DM010	52.143306333333335	Emx-Cre+;DGF/-	Emx-DG-cKO
3	SO	P5	DM011	34.33345590000001	Emx-Cre+;DGF/-	Emx-DG-cKO
3	SO	P5	DM012	23.143606000000005	Emx-Cre+;DGF/-	Emx-DG-cKO
3	SO	P5	DM013	79.16061166666667	Emx-Cre+;DGF/-	Emx-DG-cKO
3	SO	P5	DM014	116.95854433333334	Emx-Cre+;DGF/-	Emx-DG-cKO
3	SO	P5	DM015	120.19229066666666	Emx-Cre+;DGF/-	Emx-DG-cKO
3	SO	P5	DM016	73.29325133333334	Emx-Cre+;DGF/-	Emx-DG-cKO
3	SO	P5	DM017	109.61977566666665	Emx-Cre+;DGF/-	Emx-DG-cKO
3	SO	P5	DM018	95.34329533333333	Emx-Cre+;DGF/-	Emx-DG-cKO
3	SO	P5	DM019	105.32766833333334	Emx-Cre+;DGF/-	Emx-DG-cKO
3	SO	P5	DM020	46.61181066666666	Emx-Cre+;DGF/-	Emx-DG-cKO
3	SO	P5	DM021	64.88935200000002	Emx-Cre+;DGF/-	Emx-DG-cKO
3	SO	P5	DM022	49.87392966666666	Emx-Cre+;DGF/-	Emx-DG-cKO
3	SO	P5	DM023	82.96469400000001	Emx-Cre+;DGF/-	Emx-DG-cKO
3	SO	P5	DM024	36.677368	Emx-Cre+;DGF/-	Emx-DG-cKO
3	SO	P5	DM025	116.86589733333332	Emx-Cre+;DGF/-	Emx-DG-cKO
3	SO	P5	DM026	170.48022200000003	Emx-Cre+;DGF/-	Emx-DG-cKO
3	SO	P5	DM027	114.13326766666667	Emx-Cre+;DGF/-	Emx-DG-cKO
3	SO	P5	DM028	114.825609	Emx-Cre+;DGF/-	Emx-DG-cKO
3	SO	P5	DM029	94.36113233333333	Emx-Cre+;DGF/-	Emx-DG-cKO
3	SO	P5	DM030	39.67289299999999	Emx-Cre+;DGF/-	Emx-DG-cKO
3	SO	P5	DM031	162.92520199999998	Emx-Cre+;DGF/-	Emx-DG-cKO
3	SO	P5	DM032	11.061352833333316	Emx-Cre+;DGF/-	Emx-DG-cKO
3	SO	P5	DM033	157.26603666666668	Emx-Cre+;DGF/-	Emx-DG-cKO
3	SO	P5	DM034	118.04565466666669	Emx-Cre+;DGF/-	Emx-DG-cKO
3	SO	P5	DM035	145.80354066666666	Emx-Cre+;DGF/-	Emx-DG-cKO
3	SO	P5	DM036	65.69855800000002	Emx-Cre+;DGF/-	Emx-DG-cKO
3	SO	P5	DM037	165.035369	Emx-Cre+;DGF/-	Emx-DG-cKO
3	SO	P5	DM038	134.51700666666667	Emx-Cre+;DGF/-	Emx-DG-cKO
3	SO	P5	DM039	106.95282033333334	Emx-Cre+;DGF/-	Emx-DG-cKO
3	SO	P5	DM040	65.975318	Emx-Cre+;DGF/-	Emx-DG-cKO
3	SO	P5	DM041	26.125643	Emx-Cre+;DGF/-	Emx-DG-cKO
3	SO	P5	DM042	31.354279666666667	Emx-Cre+;DGF/-	Emx-DG-cKO
3	SO	P5	DM043	24.12284066666666	Emx-Cre+;DGF/-	Emx-DG-cKO
3	SO	P5	DM044	-28.783634000000003	Emx-Cre+;DGF/+	Emx-DG-Ctrl
3	SO	P5	DM045	-8.363311999999999	Emx-Cre+;DGF/+	Emx-DG-Ctrl
3	SO	P5	DM046	27.257193666666677	Emx-Cre+;DGF/+	Emx-DG-Ctrl
3	SO	P5	DM047	31.022886666666665	Emx-Cre+;DGF/+	Emx-DG-Ctrl
3	SO	P5	DM048	24.869090999999997	Emx-Cre+;DGF/+	Emx-DG-Ctrl
3	SO	P5	DM049	10.90544866666668	Emx-Cre+;DGF/+	Emx-DG-Ctrl
3	SO	P5	DM050	-18.96993466666666	Emx-Cre+;DGF/+	Emx-DG-Ctrl
3	SO	P5	DM051	-21.30201199999999	Emx-Cre+;DGF/+	Emx-DG-Ctrl
3	SO	P5	DM052	40.11629933333331	Emx-Cre+;DGF/+	Emx-DG-Ctrl
3	SO	P5	DM053	7.215962333333333	Emx-Cre+;DGF/+	Emx-DG-Ctrl
3	SO	P5	DM054	30.14204566666667	Emx-Cre+;DGF/+	Emx-DG-Ctrl
3	SO	P5	DM055	42.32870400000001	Emx-Cre+;DGF/+	Emx-DG-Ctrl
3	SO	P5	DM056	26.94592833333334	Emx-Cre+;DGF/+	Emx-DG-Ctrl
3	SO	P5	DM057	50.08591766666667	Emx-Cre+;DGF/+	Emx-DG-Ctrl
3	SO	P5	DM058	26.029885666666672	Emx-Cre+;DGF/+	Emx-DG-Ctrl
3	SO	P5	DM059	92.52834766666668	Emx-Cre+;DGF/+	Emx-DG-Ctrl
3	SO	P5	DM060	53.05581499999999	Emx-Cre+;DGF/+	Emx-DG-Ctrl
3	SO	P5	DM061	41.16917333333334	Emx-Cre+;DGF/+	Emx-DG-Ctrl
3	SO	P5	DM062	24.03808666666667	Emx-Cre+;DGF/+	Emx-DG-Ctrl
3	SO	P5	DM063	-3.2997753333333293	Emx-Cre+;DGF/+	Emx-DG-Ctrl
3	SO	P5	DM064	14.553306333333333	Emx-Cre+;DGF/+	Emx-DG-Ctrl
3	SO	P5	DM065	28.671571999999987	Emx-Cre+;DGF/+	Emx-DG-Ctrl
3	SO	P5	DM066	18.21119733333332	Emx-Cre+;DGF/+	Emx-DG-Ctrl
3	SO	P5	DM067	56.498522666666666	Emx-Cre+;DGF/+	Emx-DG-Ctrl
3	SO	P5	DM068	61.14458333333334	Emx-Cre+;DGF/+	Emx-DG-Ctrl
3	SO	P5	DM069	65.49875100000001	Emx-Cre+;DGF/+	Emx-DG-Ctrl
3	SO	P5	DM070	4.2995870000000025	Emx-Cre+;DGF/+	Emx-DG-Ctrl
3	SO	P5	DM071	14.005246	Emx-Cre+;DGF/+	Emx-DG-Ctrl
3	SO	P5	DM072	10.109026	Emx-Cre+;DGF/+	Emx-DG-Ctrl
3	SO	P5	DM073	-11.799424999999994	Emx-Cre+;DGF/+	Emx-DG-Ctrl
3	SO	P5	DM074	33.74608600000001	Emx-Cre+;DGF/+	Emx-DG-Ctrl
3	SO	P5	DM075	42.85164766666667	Emx-Cre+;DGF/+	Emx-DG-Ctrl
-17	SO	P10	DM076	246.96055766666663	Emx-Cre+;DGF/-	Emx-DG-cKO
-17	SO	P10	DM077	110.19605233333334	Emx-Cre+;DGF/-	Emx-DG-cKO
-17	SO	P10	DM078	81.85552366666666	Emx-Cre+;DGF/-	Emx-DG-cKO
-17	SO	P10	DM079	82.61647833333335	Emx-Cre+;DGF/-	Emx-DG-cKO
-17	SO	P10	DM080	93.59963766666667	Emx-Cre+;DGF/-	Emx-DG-cKO
-17	SO	P10	DM081	77.48267866666667	Emx-Cre+;DGF/-	Emx-DG-cKO
-17	SO	P10	DM082	88.256303	Emx-Cre+;DGF/-	Emx-DG-cKO
-17	SO	P10	DM083	81.09664966666668	Emx-Cre+;DGF/-	Emx-DG-cKO
-17	SO	P10	DM084	111.89627166666666	Emx-Cre+;DGF/-	Emx-DG-cKO
-17	SO	P10	DM085	77.38663466666667	Emx-Cre+;DGF/-	Emx-DG-cKO
-17	SO	P10	DM086	81.169568	Emx-Cre+;DGF/-	Emx-DG-cKO
-17	SO	P10	DM087	36.121822999999985	Emx-Cre+;DGF/-	Emx-DG-cKO
-17	SO	P10	DM088	100.60500133333333	Emx-Cre+;DGF/-	Emx-DG-cKO
-17	SO	P10	DM089	53.23227133333334	Emx-Cre+;DGF/-	Emx-DG-cKO
-17	SO	P10	DM090	74.112377	Emx-Cre+;DGF/-	Emx-DG-cKO
-17	SO	P10	DM091	-5.393107999999994	Emx-Cre+;DGF/-	Emx-DG-cKO
-17	SO	P10	DM092	67.2280453333333	Emx-Cre+;DGF/-	Emx-DG-cKO
-17	SO	P10	DM093	-28.323496000000006	Emx-Cre+;DGF/-	Emx-DG-cKO
-17	SO	P10	DM094	43.339133333333315	Emx-Cre+;DGF/-	Emx-DG-cKO
-17	SO	P10	DM095	25.859792333333342	Emx-Cre+;DGF/-	Emx-DG-cKO
-17	SO	P10	DM096	26.835149333333323	Emx-Cre+;DGF/-	Emx-DG-cKO
-17	SO	P10	DM097	30.499296999999995	Emx-Cre+;DGF/-	Emx-DG-cKO
-17	SO	P10	DM098	129.52636466666667	Emx-Cre+;DGF/-	Emx-DG-cKO
-17	SO	P10	DM099	-18.671464000000014	Emx-Cre+;DGF/-	Emx-DG-cKO
-17	SO	P10	DM100	47.287254999999995	Emx-Cre+;DGF/-	Emx-DG-cKO
-17	SO	P10	DM101	-19.424592333333322	Emx-Cre+;DGF/-	Emx-DG-cKO
-17	SO	P10	DM102	1.8979200000000087	Emx-Cre+;DGF/-	Emx-DG-cKO
-17	SO	P10	DM103	51.28070166666668	Emx-Cre+;DGF/-	Emx-DG-cKO
-17	SO	P10	DM104	86.34452433333333	Emx-Cre+;DGF/-	Emx-DG-cKO
-17	SO	P10	DM105	31.608136000000012	Emx-Cre+;DGF/-	Emx-DG-cKO
-17	SO	P10	DM106	61.50422633333333	Emx-Cre+;DGF/-	Emx-DG-cKO
-17	SO	P10	DM107	5.8136753333333315	Emx-Cre+;DGF/-	Emx-DG-cKO
-17	SO	P10	DM108	29.681516999999996	Emx-Cre+;DGF/-	Emx-DG-cKO
-17	SO	P10	DM109	-46.98367533333333	Emx-Cre+;DGF/-	Emx-DG-cKO
-17	SO	P10	DM110	56.603827333333335	Emx-Cre+;DGF/-	Emx-DG-cKO
-17	SO	P10	DM111	51.21687966666667	Emx-Cre+;DGF/-	Emx-DG-cKO
-17	SO	P10	DM112	152.53586866666666	Emx-Cre+;DGF/-	Emx-DG-cKO
-17	SO	P10	DM113	47.304881999999985	Emx-Cre+;DGF/-	Emx-DG-cKO
-17	SO	P10	DM114	-20.265811	Emx-Cre+;DGF/-	Emx-DG-cKO
-17	SO	P10	DM115	21.59966933333334	Emx-Cre+;DGF/-	Emx-DG-cKO
-17	SO	P10	DM116	3.644067000000007	Emx-Cre+;DGF/-	Emx-DG-cKO
-17	SO	P10	DM117	48.217530666666676	Emx-Cre+;DGF/-	Emx-DG-cKO
-17	SO	P10	DM118	8.720576666666659	Emx-Cre+;DGF/-	Emx-DG-cKO
-17	SO	P10	DM119	9.946367666666674	Emx-Cre+;DGF/-	Emx-DG-cKO
-17	SO	P10	DM120	9.339855999999997	Emx-Cre+;DGF/+	Emx-DG-Ctrl
-17	SO	P10	DM121	-36.366013333333335	Emx-Cre+;DGF/+	Emx-DG-Ctrl
-17	SO	P10	DM122	-29.779685999999987	Emx-Cre+;DGF/+	Emx-DG-Ctrl
-17	SO	P10	DM123	-31.850588999999996	Emx-Cre+;DGF/+	Emx-DG-Ctrl
-17	SO	P10	DM124	-52.407343999999995	Emx-Cre+;DGF/+	Emx-DG-Ctrl
-17	SO	P10	DM125	-2.8434323333333205	Emx-Cre+;DGF/+	Emx-DG-Ctrl
-17	SO	P10	DM126	-29.526425666666665	Emx-Cre+;DGF/+	Emx-DG-Ctrl
-17	SO	P10	DM127	-5.038601	Emx-Cre+;DGF/+	Emx-DG-Ctrl
-17	SO	P10	DM128	-34.18295299999999	Emx-Cre+;DGF/+	Emx-DG-Ctrl
-17	SO	P10	DM129	-35.828405333333336	Emx-Cre+;DGF/+	Emx-DG-Ctrl
-17	SO	P10	DM130	-35.526986666666666	Emx-Cre+;DGF/+	Emx-DG-Ctrl
-17	SO	P10	DM131	-31.36210433333334	Emx-Cre+;DGF/+	Emx-DG-Ctrl
-17	SO	P10	DM132	-73.73695599999999	Emx-Cre+;DGF/+	Emx-DG-Ctrl
-17	SO	P10	DM133	-22.36406333333333	Emx-Cre+;DGF/+	Emx-DG-Ctrl
-17	SO	P10	DM134	-26.129676000000007	Emx-Cre+;DGF/+	Emx-DG-Ctrl
-17	SO	P10	DM135	-16.814451333333334	Emx-Cre+;DGF/+	Emx-DG-Ctrl
-17	SO	P10	DM136	-34.14707766666667	Emx-Cre+;DGF/+	Emx-DG-Ctrl
-17	SO	P10	DM137	-21.045973333333325	Emx-Cre+;DGF/+	Emx-DG-Ctrl
-17	SO	P10	DM138	-18.389605	Emx-Cre+;DGF/+	Emx-DG-Ctrl
-17	SO	P10	DM139	-9.901056666666667	Emx-Cre+;DGF/+	Emx-DG-Ctrl
-17	SO	P10	DM140	-33.66312566666665	Emx-Cre+;DGF/+	Emx-DG-Ctrl
-17	SO	P10	DM141	-58.91093200000001	Emx-Cre+;DGF/+	Emx-DG-Ctrl
-17	SO	P10	DM142	-48.28678466666667	Emx-Cre+;DGF/+	Emx-DG-Ctrl
-17	SO	P10	DM143	-32.774084333333334	Emx-Cre+;DGF/+	Emx-DG-Ctrl
-17	SO	P10	DM144	-12.789332000000002	Emx-Cre+;DGF/+	Emx-DG-Ctrl
-17	SO	P10	DM145	-15.929497666666663	Emx-Cre+;DGF/+	Emx-DG-Ctrl
-17	SO	P10	DM146	-33.84915766666666	Emx-Cre+;DGF/+	Emx-DG-Ctrl
-17	SO	P10	DM147	-33.35150466666667	Emx-Cre+;DGF/+	Emx-DG-Ctrl
-17	SO	P10	DM148	-44.67489466666667	Emx-Cre+;DGF/+	Emx-DG-Ctrl
-17	SO	P10	DM149	-30.752255666666667	Emx-Cre+;DGF/+	Emx-DG-Ctrl
3	SO	P15	DM150	-23.615502666666668	Emx-Cre+;DGF/-	Emx-DG-cKO
3	SO	P15	DM151	-7.536371333333345	Emx-Cre+;DGF/-	Emx-DG-cKO
3	SO	P15	DM152	4.105758666666664	Emx-Cre+;DGF/-	Emx-DG-cKO
3	SO	P15	DM153	-11.478253666666674	Emx-Cre+;DGF/-	Emx-DG-cKO
3	SO	P15	DM154	2.4893873333333354	Emx-Cre+;DGF/-	Emx-DG-cKO
3	SO	P15	DM155	-23.714527333333326	Emx-Cre+;DGF/-	Emx-DG-cKO
3	SO	P15	DM156	-12.43740666666667	Emx-Cre+;DGF/-	Emx-DG-cKO
3	SO	P15	DM157	1.3351703333333376	Emx-Cre+;DGF/-	Emx-DG-cKO
3	SO	P15	DM158	6.23586233333333	Emx-Cre+;DGF/-	Emx-DG-cKO
3	SO	P15	DM159	-3.17752933333333	Emx-Cre+;DGF/-	Emx-DG-cKO
3	SO	P15	DM160	7.392501333333324	Emx-Cre+;DGF/-	Emx-DG-cKO
3	SO	P15	DM161	-23.571083333333323	Emx-Cre+;DGF/-	Emx-DG-cKO
3	SO	P15	DM162	-6.432407333333326	Emx-Cre+;DGF/-	Emx-DG-cKO
3	SO	P15	DM163	4.582206333333327	Emx-Cre+;DGF/-	Emx-DG-cKO
3	SO	P15	DM164	-5.665502666666669	Emx-Cre+;DGF/-	Emx-DG-cKO
3	SO	P15	DM165	2.6946220000000003	Emx-Cre+;DGF/-	Emx-DG-cKO
3	SO	P15	DM166	22.021523666666656	Emx-Cre+;DGF/-	Emx-DG-cKO
3	SO	P15	DM167	-32.67537633333333	Emx-Cre+;DGF/-	Emx-DG-cKO
3	SO	P15	DM168	-10.826107666666653	Emx-Cre+;DGF/-	Emx-DG-cKO
3	SO	P15	DM169	28.231685	Emx-Cre+;DGF/-	Emx-DG-cKO
3	SO	P15	DM170	-16.434132999999992	Emx-Cre+;DGF/-	Emx-DG-cKO
3	SO	P15	DM171	-6.704377333333326	Emx-Cre+;DGF/-	Emx-DG-cKO
3	SO	P15	DM172	-4.376560666666667	Emx-Cre+;DGF/-	Emx-DG-cKO
3	SO	P15	DM173	16.22713999999999	Emx-Cre+;DGF/-	Emx-DG-cKO
3	SO	P15	DM174	34.04708333333334	Emx-Cre+;DGF/-	Emx-DG-cKO
3	SO	P15	DM175	20.224124	Emx-Cre+;DGF/-	Emx-DG-cKO
3	SO	P15	DM176	0.0838929999999986	Emx-Cre+;DGF/-	Emx-DG-cKO
3	SO	P15	DM177	83.37274033333335	Emx-Cre+;DGF/-	Emx-DG-cKO
3	SO	P15	DM178	-22.25827566666668	Emx-Cre+;DGF/-	Emx-DG-cKO
3	SO	P15	DM179	31.732731999999988	Emx-Cre+;DGF/-	Emx-DG-cKO
3	SO	P15	DM180	4.658785666666669	Emx-Cre+;DGF/-	Emx-DG-cKO
3	SO	P15	DM181	-5.44096300000002	Emx-Cre+;DGF/-	Emx-DG-cKO
3	SO	P15	DM182	28.53010466666667	Emx-Cre+;DGF/-	Emx-DG-cKO
3	SO	P15	DM183	16.685752666666662	Emx-Cre+;DGF/-	Emx-DG-cKO
3	SO	P15	DM184	28.54655433333333	Emx-Cre+;DGF/-	Emx-DG-cKO
3	SO	P15	DM185	-36.06082266666667	Emx-Cre+;DGF/-	Emx-DG-cKO
3	SO	P15	DM186	-25.629896	Emx-Cre+;DGF/-	Emx-DG-cKO
3	SO	P15	DM187	8.006673666666662	Emx-Cre+;DGF/-	Emx-DG-cKO
3	SO	P15	DM188	-11.107827999999992	Emx-Cre+;DGF/-	Emx-DG-cKO
3	SO	P15	DM189	-25.78664433333333	Emx-Cre+;DGF/-	Emx-DG-cKO
3	SO	P15	DM190	-34.453812333333325	Emx-Cre+;DGF/-	Emx-DG-cKO
3	SO	P15	DM191	-8.69480866666666	Emx-Cre+;DGF/-	Emx-DG-cKO
3	SO	P15	DM192	-20.232865333333333	Emx-Cre+;DGF/-	Emx-DG-cKO
3	SO	P15	DM193	3.907393000000004	Emx-Cre+;DGF/-	Emx-DG-cKO
3	SO	P15	DM194	-17.22361933333333	Emx-Cre+;DGF/+	Emx-DG-Ctrl
3	SO	P15	DM195	-19.18543899999999	Emx-Cre+;DGF/+	Emx-DG-Ctrl
3	SO	P15	DM196	-20.192424666666668	Emx-Cre+;DGF/+	Emx-DG-Ctrl
3	SO	P15	DM197	-43.78150633333333	Emx-Cre+;DGF/+	Emx-DG-Ctrl
3	SO	P15	DM198	-34.90023866666667	Emx-Cre+;DGF/+	Emx-DG-Ctrl
3	SO	P15	DM199	-6.958597999999995	Emx-Cre+;DGF/+	Emx-DG-Ctrl
3	SO	P15	DM200	-28.656181666666658	Emx-Cre+;DGF/+	Emx-DG-Ctrl
3	SO	P15	DM201	-40.89056766666667	Emx-Cre+;DGF/+	Emx-DG-Ctrl
3	SO	P15	DM202	-28.924026666666673	Emx-Cre+;DGF/+	Emx-DG-Ctrl
3	SO	P15	DM203	-27.837706666666676	Emx-Cre+;DGF/+	Emx-DG-Ctrl
3	SO	P15	DM204	-39.43576133333334	Emx-Cre+;DGF/+	Emx-DG-Ctrl
3	SO	P15	DM205	-64.15467800000003	Emx-Cre+;DGF/+	Emx-DG-Ctrl
3	SO	P15	DM206	18.119143666666634	Emx-Cre+;DGF/+	Emx-DG-Ctrl
3	SO	P15	DM207	-51.07305166666667	Emx-Cre+;DGF/+	Emx-DG-Ctrl
3	SO	P15	DM208	-25.29181700000001	Emx-Cre+;DGF/+	Emx-DG-Ctrl
3	SO	P15	DM209	-31.48640233333334	Emx-Cre+;DGF/+	Emx-DG-Ctrl
3	SO	P15	DM210	-29.039359666666655	Emx-Cre+;DGF/+	Emx-DG-Ctrl
3	SO	P15	DM211	-17.628936999999993	Emx-Cre+;DGF/+	Emx-DG-Ctrl
3	SO	P15	DM212	-26.379857333333337	Emx-Cre+;DGF/+	Emx-DG-Ctrl
3	SO	P15	DM213	-50.55244133333334	Emx-Cre+;DGF/+	Emx-DG-Ctrl
3	SO	P15	DM214	-74.48185933333333	Emx-Cre+;DGF/+	Emx-DG-Ctrl
3	SO	P15	DM215	-57.32316333333333	Emx-Cre+;DGF/+	Emx-DG-Ctrl
3	SO	P15	DM216	-33.87430766666666	Emx-Cre+;DGF/+	Emx-DG-Ctrl
3	SO	P15	DM217	-47.288901333333335	Emx-Cre+;DGF/+	Emx-DG-Ctrl
3	SO	P15	DM218	-60.37162566666667	Emx-Cre+;DGF/+	Emx-DG-Ctrl
3	SO	P15	DM219	-13.392128333333346	Emx-Cre+;DGF/+	Emx-DG-Ctrl
3	SO	P15	DM220	-9.230236	Emx-Cre+;DGF/+	Emx-DG-Ctrl
3	SO	P15	DM221	-23.868448333333333	Emx-Cre+;DGF/+	Emx-DG-Ctrl
3	SO	P15	DM222	-4.391576333333329	Emx-Cre+;DGF/+	Emx-DG-Ctrl
3	SO	P15	DM223	-32.530690666666665	Emx-Cre+;DGF/+	Emx-DG-Ctrl
3	SO	P15	DM224	-26.67346300000001	Emx-Cre+;DGF/+	Emx-DG-Ctrl
3	SO	P15	DM225	-39.581787666666656	Emx-Cre+;DGF/+	Emx-DG-Ctrl
3	SO	P15	DM226	-26.512304	Emx-Cre+;DGF/+	Emx-DG-Ctrl
3	SO	P15	DM227	-35.305771333333325	Emx-Cre+;DGF/+	Emx-DG-Ctrl
3	SO	P15	DM228	-102.02013233333334	Emx-Cre+;DGF/+	Emx-DG-Ctrl
3	SO	P15	DM229	-56.96452966666667	Emx-Cre+;DGF/+	Emx-DG-Ctrl
3	SO	P15	DM230	-46.01305633333334	Emx-Cre+;DGF/+	Emx-DG-Ctrl
3	SO	P15	DM231	-27.727725000000003	Emx-Cre+;DGF/+	Emx-DG-Ctrl
3	SO	P15	DM232	-71.42620966666667	Emx-Cre+;DGF/+	Emx-DG-Ctrl
3	SO	P15	DM233	-23.916373000000004	Emx-Cre+;DGF/+	Emx-DG-Ctrl
3	SO	P15	DM234	-41.223853999999996	Emx-Cre+;DGF/+	Emx-DG-Ctrl
3	SO	P15	DM235	-30.022706666666664	Emx-Cre+;DGF/+	Emx-DG-Ctrl
3	SO	P15	DM236	-37.17049133333333	Emx-Cre+;DGF/+	Emx-DG-Ctrl
3	SO	P15	DM237	-37.20582999999999	Emx-Cre+;DGF/+	Emx-DG-Ctrl
3	SO	P15	DM238	-28.270693000000005	Emx-Cre+;DGF/+	Emx-DG-Ctrl
3	SO	P30	DM239	-123.68363433333333	Emx-Cre+;DGF/-	Emx-DG-cKO
3	SO	P30	DM240	12.178697666666684	Emx-Cre+;DGF/-	Emx-DG-cKO
3	SO	P30	DM241	-95.080279	Emx-Cre+;DGF/-	Emx-DG-cKO
3	SO	P30	DM242	27.684426666666678	Emx-Cre+;DGF/-	Emx-DG-cKO
3	SO	P30	DM243	-54.302182666666646	Emx-Cre+;DGF/-	Emx-DG-cKO
3	SO	P30	DM244	0.8946586666666386	Emx-Cre+;DGF/-	Emx-DG-cKO
3	SO	P30	DM245	-37.38690866666667	Emx-Cre+;DGF/-	Emx-DG-cKO
3	SO	P30	DM246	-43.81304966666668	Emx-Cre+;DGF/-	Emx-DG-cKO
3	SO	P30	DM247	-32.66423933333332	Emx-Cre+;DGF/-	Emx-DG-cKO
3	SO	P30	DM248	-52.636694999999996	Emx-Cre+;DGF/-	Emx-DG-cKO
3	SO	P30	DM249	-60.94800299999999	Emx-Cre+;DGF/-	Emx-DG-cKO
3	SO	P30	DM250	214.17254633333334	Emx-Cre+;DGF/-	Emx-DG-cKO
3	SO	P30	DM251	60.308794	Emx-Cre+;DGF/-	Emx-DG-cKO
3	SO	P30	DM252	-12.755503666666641	Emx-Cre+;DGF/-	Emx-DG-cKO
3	SO	P30	DM253	-0.5294183333333345	Emx-Cre+;DGF/-	Emx-DG-cKO
3	SO	P30	DM254	91.17958563333333	Emx-Cre+;DGF/-	Emx-DG-cKO
3	SO	P30	DM255	-29.049822000000006	Emx-Cre+;DGF/-	Emx-DG-cKO
3	SO	P30	DM256	-58.45210933333333	Emx-Cre+;DGF/-	Emx-DG-cKO
3	SO	P30	DM257	-34.803589999999986	Emx-Cre+;DGF/-	Emx-DG-cKO
3	SO	P30	DM258	0.18609966666665892	Emx-Cre+;DGF/-	Emx-DG-cKO
3	SO	P30	DM259	16.683063000000004	Emx-Cre+;DGF/-	Emx-DG-cKO
3	SO	P30	DM260	23.12468466666665	Emx-Cre+;DGF/-	Emx-DG-cKO
3	SO	P30	DM261	81.77338466666667	Emx-Cre+;DGF/-	Emx-DG-cKO
3	SO	P30	DM262	44.91768166666668	Emx-Cre+;DGF/-	Emx-DG-cKO
3	SO	P30	DM263	38.407861666666655	Emx-Cre+;DGF/-	Emx-DG-cKO
3	SO	P30	DM264	7.936892333333333	Emx-Cre+;DGF/-	Emx-DG-cKO
3	SO	P30	DM265	26.41957933333333	Emx-Cre+;DGF/-	Emx-DG-cKO
3	SO	P30	DM266	153.52413833333333	Emx-Cre+;DGF/-	Emx-DG-cKO
3	SO	P30	DM267	11.980835333333326	Emx-Cre+;DGF/-	Emx-DG-cKO
3	SO	P30	DM268	60.32354899999998	Emx-Cre+;DGF/-	Emx-DG-cKO
3	SO	P30	DM269	-10.233471333333341	Emx-Cre+;DGF/-	Emx-DG-cKO
3	SO	P30	DM270	43.609812	Emx-Cre+;DGF/-	Emx-DG-cKO
3	SO	P30	DM271	3.215395000000001	Emx-Cre+;DGF/-	Emx-DG-cKO
3	SO	P30	DM272	142.30531700000003	Emx-Cre+;DGF/-	Emx-DG-cKO
3	SO	P30	DM273	150.63071833333336	Emx-Cre+;DGF/-	Emx-DG-cKO
3	SO	P30	DM274	-30.044648333333345	Emx-Cre+;DGF/-	Emx-DG-cKO
3	SO	P30	DM275	8.756900666666658	Emx-Cre+;DGF/-	Emx-DG-cKO
3	SO	P30	DM276	85.43731499999996	Emx-Cre+;DGF/-	Emx-DG-cKO
3	SO	P30	DM277	-101.51180366666667	Emx-Cre+;DGF/-	Emx-DG-cKO
3	SO	P30	DM278	-98.72586899999999	Emx-Cre+;DGF/+	Emx-DG-Ctrl
3	SO	P30	DM279	-36.435044000000005	Emx-Cre+;DGF/+	Emx-DG-Ctrl
3	SO	P30	DM280	-93.035043	Emx-Cre+;DGF/+	Emx-DG-Ctrl
3	SO	P30	DM281	-23.578002999999985	Emx-Cre+;DGF/+	Emx-DG-Ctrl
3	SO	P30	DM282	-18.51541100000001	Emx-Cre+;DGF/+	Emx-DG-Ctrl
3	SO	P30	DM283	-84.16506533333332	Emx-Cre+;DGF/+	Emx-DG-Ctrl
3	SO	P30	DM284	-85.64646633333331	Emx-Cre+;DGF/+	Emx-DG-Ctrl
3	SO	P30	DM285	-53.67985866666667	Emx-Cre+;DGF/+	Emx-DG-Ctrl
3	SO	P30	DM286	-56.097350333333345	Emx-Cre+;DGF/+	Emx-DG-Ctrl
3	SO	P30	DM287	-50.93741533333333	Emx-Cre+;DGF/+	Emx-DG-Ctrl
3	SO	P30	DM288	-36.23014733333331	Emx-Cre+;DGF/+	Emx-DG-Ctrl
3	SO	P30	DM289	-88.08577366666667	Emx-Cre+;DGF/+	Emx-DG-Ctrl
3	SO	P30	DM290	44.49513300000001	Emx-Cre+;DGF/+	Emx-DG-Ctrl
3	SO	P30	DM291	-47.10389633333335	Emx-Cre+;DGF/+	Emx-DG-Ctrl
3	SO	P30	DM292	-44.78745366666666	Emx-Cre+;DGF/+	Emx-DG-Ctrl
3	SO	P30	DM293	-66.20468333333335	Emx-Cre+;DGF/+	Emx-DG-Ctrl
3	SO	P30	DM294	-33.0246	Emx-Cre+;DGF/+	Emx-DG-Ctrl
3	SO	P30	DM295	-58.06676133333332	Emx-Cre+;DGF/+	Emx-DG-Ctrl
3	SO	P30	DM296	-79.83841533333334	Emx-Cre+;DGF/+	Emx-DG-Ctrl
3	SO	P30	DM297	-61.84005266666668	Emx-Cre+;DGF/+	Emx-DG-Ctrl
3	SO	P30	DM298	-62.49641299999999	Emx-Cre+;DGF/+	Emx-DG-Ctrl
3	SO	P30	DM299	-24.628163333333315	Emx-Cre+;DGF/+	Emx-DG-Ctrl
3	SO	P30	DM300	-58.12988833333335	Emx-Cre+;DGF/+	Emx-DG-Ctrl
3	SO	P30	DM301	-57.248805000000004	Emx-Cre+;DGF/+	Emx-DG-Ctrl
3	SO	P30	DM302	-39.488977	Emx-Cre+;DGF/+	Emx-DG-Ctrl
3	SO	P30	DM303	-82.17804300000002	Emx-Cre+;DGF/+	Emx-DG-Ctrl
3	SO	P30	DM304	-102.12301933333335	Emx-Cre+;DGF/+	Emx-DG-Ctrl
3	SO	P30	DM305	-29.953354333333362	Emx-Cre+;DGF/+	Emx-DG-Ctrl
3	SO	P30	DM306	-23.72920666666666	Emx-Cre+;DGF/+	Emx-DG-Ctrl
3	SO	P30	DM307	-60.340876	Emx-Cre+;DGF/+	Emx-DG-Ctrl
3	SO	P30	DM308	-40.80871566666667	Emx-Cre+;DGF/+	Emx-DG-Ctrl
3	SO	P30	DM309	-104.13794766666666	Emx-Cre+;DGF/+	Emx-DG-Ctrl
3	SO	P30	DM310	-91.29222099999997	Emx-Cre+;DGF/+	Emx-DG-Ctrl
3	SO	P30	DM311	-67.41595066666666	Emx-Cre+;DGF/+	Emx-DG-Ctrl
3	SO	P30	DM312	-71.45817766666667	Emx-Cre+;DGF/+	Emx-DG-Ctrl
3	SO	P30	DM313	-99.28051599999999	Emx-Cre+;DGF/+	Emx-DG-Ctrl
3	SO	P30	DM314	-78.88370933333333	Emx-Cre+;DGF/+	Emx-DG-Ctrl
3	SO	P30	DM315	-86.73105066666666	Emx-Cre+;DGF/+	Emx-DG-Ctrl
3	SO	P30	DM316	-52.10485466666666	Emx-Cre+;DGF/+	Emx-DG-Ctrl
3	SO	P30	DM317	-87.28016033333336	Emx-Cre+;DGF/+	Emx-DG-Ctrl
3	SO	P30	DM318	-38.72704533333333	Emx-Cre+;DGF/+	Emx-DG-Ctrl
3	SO	P30	DM319	-90.05535266666664	Emx-Cre+;DGF/+	Emx-DG-Ctrl
3	SO	P30	DM320	-78.209516	Emx-Cre+;DGF/+	Emx-DG-Ctrl
3	SO	P30	DM321	-96.999927	Emx-Cre+;DGF/+	Emx-DG-Ctrl
4	SO	P5	DM001	78.17339333333335	Emx-Cre+;DGF/-	Emx-DG-cKO
4	SO	P5	DM002	78.44293866666666	Emx-Cre+;DGF/-	Emx-DG-cKO
4	SO	P5	DM003	66.688628	Emx-Cre+;DGF/-	Emx-DG-cKO
4	SO	P5	DM004	40.88701480000001	Emx-Cre+;DGF/-	Emx-DG-cKO
4	SO	P5	DM005	58.71010866666668	Emx-Cre+;DGF/-	Emx-DG-cKO
4	SO	P5	DM006	25.439856000000002	Emx-Cre+;DGF/-	Emx-DG-cKO
4	SO	P5	DM007	41.85345036666667	Emx-Cre+;DGF/-	Emx-DG-cKO
4	SO	P5	DM008	37.326375333333324	Emx-Cre+;DGF/-	Emx-DG-cKO
4	SO	P5	DM009	40.41012699999999	Emx-Cre+;DGF/-	Emx-DG-cKO
4	SO	P5	DM010	52.814973	Emx-Cre+;DGF/-	Emx-DG-cKO
4	SO	P5	DM011	29.474360900000004	Emx-Cre+;DGF/-	Emx-DG-cKO
4	SO	P5	DM012	19.225780999999998	Emx-Cre+;DGF/-	Emx-DG-cKO
4	SO	P5	DM013	71.82721166666666	Emx-Cre+;DGF/-	Emx-DG-cKO
4	SO	P5	DM014	104.285261	Emx-Cre+;DGF/-	Emx-DG-cKO
4	SO	P5	DM015	127.547324	Emx-Cre+;DGF/-	Emx-DG-cKO
4	SO	P5	DM016	82.06813466666667	Emx-Cre+;DGF/-	Emx-DG-cKO
4	SO	P5	DM017	116.23719233333334	Emx-Cre+;DGF/-	Emx-DG-cKO
4	SO	P5	DM018	85.248512	Emx-Cre+;DGF/-	Emx-DG-cKO
4	SO	P5	DM019	95.78193500000002	Emx-Cre+;DGF/-	Emx-DG-cKO
4	SO	P5	DM020	52.644527333333336	Emx-Cre+;DGF/-	Emx-DG-cKO
4	SO	P5	DM021	59.711435333333334	Emx-Cre+;DGF/-	Emx-DG-cKO
4	SO	P5	DM022	56.356463	Emx-Cre+;DGF/-	Emx-DG-cKO
4	SO	P5	DM023	87.46072733333335	Emx-Cre+;DGF/-	Emx-DG-cKO
4	SO	P5	DM024	37.154667999999994	Emx-Cre+;DGF/-	Emx-DG-cKO
4	SO	P5	DM025	100.28174733333336	Emx-Cre+;DGF/-	Emx-DG-cKO
4	SO	P5	DM026	164.07545533333334	Emx-Cre+;DGF/-	Emx-DG-cKO
4	SO	P5	DM027	130.759901	Emx-Cre+;DGF/-	Emx-DG-cKO
4	SO	P5	DM028	128.55915900000002	Emx-Cre+;DGF/-	Emx-DG-cKO
4	SO	P5	DM029	97.25851566666667	Emx-Cre+;DGF/-	Emx-DG-cKO
4	SO	P5	DM030	41.65319299999999	Emx-Cre+;DGF/-	Emx-DG-cKO
4	SO	P5	DM031	160.26756866666668	Emx-Cre+;DGF/-	Emx-DG-cKO
4	SO	P5	DM032	11.567961166666668	Emx-Cre+;DGF/-	Emx-DG-cKO
4	SO	P5	DM033	174.18103666666667	Emx-Cre+;DGF/-	Emx-DG-cKO
4	SO	P5	DM034	129.6468713333333	Emx-Cre+;DGF/-	Emx-DG-cKO
4	SO	P5	DM035	160.98817399999996	Emx-Cre+;DGF/-	Emx-DG-cKO
4	SO	P5	DM036	62.064524666666664	Emx-Cre+;DGF/-	Emx-DG-cKO
4	SO	P5	DM037	164.380169	Emx-Cre+;DGF/-	Emx-DG-cKO
4	SO	P5	DM038	143.02862333333334	Emx-Cre+;DGF/-	Emx-DG-cKO
4	SO	P5	DM039	118.28077033333332	Emx-Cre+;DGF/-	Emx-DG-cKO
4	SO	P5	DM040	67.53733466666667	Emx-Cre+;DGF/-	Emx-DG-cKO
4	SO	P5	DM041	29.060293000000005	Emx-Cre+;DGF/-	Emx-DG-cKO
4	SO	P5	DM042	32.334813	Emx-Cre+;DGF/-	Emx-DG-cKO
4	SO	P5	DM043	25.541840666666662	Emx-Cre+;DGF/-	Emx-DG-cKO
4	SO	P5	DM044	-23.30320066666667	Emx-Cre+;DGF/+	Emx-DG-Ctrl
4	SO	P5	DM045	-6.75869533333334	Emx-Cre+;DGF/+	Emx-DG-Ctrl
4	SO	P5	DM046	25.180843666666657	Emx-Cre+;DGF/+	Emx-DG-Ctrl
4	SO	P5	DM047	26.837186666666668	Emx-Cre+;DGF/+	Emx-DG-Ctrl
4	SO	P5	DM048	27.103957666666673	Emx-Cre+;DGF/+	Emx-DG-Ctrl
4	SO	P5	DM049	6.454182000000013	Emx-Cre+;DGF/+	Emx-DG-Ctrl
4	SO	P5	DM050	-15.679667999999992	Emx-Cre+;DGF/+	Emx-DG-Ctrl
4	SO	P5	DM051	-15.096061999999998	Emx-Cre+;DGF/+	Emx-DG-Ctrl
4	SO	P5	DM052	42.53568266666667	Emx-Cre+;DGF/+	Emx-DG-Ctrl
4	SO	P5	DM053	17.073145666666665	Emx-Cre+;DGF/+	Emx-DG-Ctrl
4	SO	P5	DM054	26.420662333333315	Emx-Cre+;DGF/+	Emx-DG-Ctrl
4	SO	P5	DM055	38.02922066666667	Emx-Cre+;DGF/+	Emx-DG-Ctrl
4	SO	P5	DM056	30.011944999999997	Emx-Cre+;DGF/+	Emx-DG-Ctrl
4	SO	P5	DM057	54.05496766666665	Emx-Cre+;DGF/+	Emx-DG-Ctrl
4	SO	P5	DM058	23.415352333333335	Emx-Cre+;DGF/+	Emx-DG-Ctrl
4	SO	P5	DM059	87.178331	Emx-Cre+;DGF/+	Emx-DG-Ctrl
4	SO	P5	DM060	55.03641499999998	Emx-Cre+;DGF/+	Emx-DG-Ctrl
4	SO	P5	DM061	52.318490000000004	Emx-Cre+;DGF/+	Emx-DG-Ctrl
4	SO	P5	DM062	27.24768666666667	Emx-Cre+;DGF/+	Emx-DG-Ctrl
4	SO	P5	DM063	5.841891333333336	Emx-Cre+;DGF/+	Emx-DG-Ctrl
4	SO	P5	DM064	12.988973000000007	Emx-Cre+;DGF/+	Emx-DG-Ctrl
4	SO	P5	DM065	32.14400533333333	Emx-Cre+;DGF/+	Emx-DG-Ctrl
4	SO	P5	DM066	19.44393066666667	Emx-Cre+;DGF/+	Emx-DG-Ctrl
4	SO	P5	DM067	55.698172666666665	Emx-Cre+;DGF/+	Emx-DG-Ctrl
4	SO	P5	DM068	56.83818333333334	Emx-Cre+;DGF/+	Emx-DG-Ctrl
4	SO	P5	DM069	66.75370099999998	Emx-Cre+;DGF/+	Emx-DG-Ctrl
4	SO	P5	DM070	7.975870333333337	Emx-Cre+;DGF/+	Emx-DG-Ctrl
4	SO	P5	DM071	13.517662666666658	Emx-Cre+;DGF/+	Emx-DG-Ctrl
4	SO	P5	DM072	14.724725999999995	Emx-Cre+;DGF/+	Emx-DG-Ctrl
4	SO	P5	DM073	-8.233741666666674	Emx-Cre+;DGF/+	Emx-DG-Ctrl
4	SO	P5	DM074	37.36945266666668	Emx-Cre+;DGF/+	Emx-DG-Ctrl
4	SO	P5	DM075	47.49111433333334	Emx-Cre+;DGF/+	Emx-DG-Ctrl
-16	SO	P10	DM076	245.41692433333333	Emx-Cre+;DGF/-	Emx-DG-cKO
-16	SO	P10	DM077	108.76446900000002	Emx-Cre+;DGF/-	Emx-DG-cKO
-16	SO	P10	DM078	88.22314033333335	Emx-Cre+;DGF/-	Emx-DG-cKO
-16	SO	P10	DM079	81.38787833333333	Emx-Cre+;DGF/-	Emx-DG-cKO
-16	SO	P10	DM080	109.39218766666666	Emx-Cre+;DGF/-	Emx-DG-cKO
-16	SO	P10	DM081	86.26594533333332	Emx-Cre+;DGF/-	Emx-DG-cKO
-16	SO	P10	DM082	90.96231966666669	Emx-Cre+;DGF/-	Emx-DG-cKO
-16	SO	P10	DM083	75.38868300000001	Emx-Cre+;DGF/-	Emx-DG-cKO
-16	SO	P10	DM084	113.28750500000001	Emx-Cre+;DGF/-	Emx-DG-cKO
-16	SO	P10	DM085	83.16801799999998	Emx-Cre+;DGF/-	Emx-DG-cKO
-16	SO	P10	DM086	76.99300133333334	Emx-Cre+;DGF/-	Emx-DG-cKO
-16	SO	P10	DM087	44.865056333333335	Emx-Cre+;DGF/-	Emx-DG-cKO
-16	SO	P10	DM088	121.33316799999999	Emx-Cre+;DGF/-	Emx-DG-cKO
-16	SO	P10	DM089	60.69927133333332	Emx-Cre+;DGF/-	Emx-DG-cKO
-16	SO	P10	DM090	77.88484366666667	Emx-Cre+;DGF/-	Emx-DG-cKO
-16	SO	P10	DM091	4.836442000000005	Emx-Cre+;DGF/-	Emx-DG-cKO
-16	SO	P10	DM092	78.20962866666666	Emx-Cre+;DGF/-	Emx-DG-cKO
-16	SO	P10	DM093	-5.6379459999999995	Emx-Cre+;DGF/-	Emx-DG-cKO
-16	SO	P10	DM094	61.4466333333333	Emx-Cre+;DGF/-	Emx-DG-cKO
-16	SO	P10	DM095	34.807225666666675	Emx-Cre+;DGF/-	Emx-DG-cKO
-16	SO	P10	DM096	33.725932666666665	Emx-Cre+;DGF/-	Emx-DG-cKO
-16	SO	P10	DM097	33.35298033333333	Emx-Cre+;DGF/-	Emx-DG-cKO
-16	SO	P10	DM098	133.72833133333333	Emx-Cre+;DGF/-	Emx-DG-cKO
-16	SO	P10	DM099	-14.507430666666664	Emx-Cre+;DGF/-	Emx-DG-cKO
-16	SO	P10	DM100	55.886205	Emx-Cre+;DGF/-	Emx-DG-cKO
-16	SO	P10	DM101	-11.678459000000004	Emx-Cre+;DGF/-	Emx-DG-cKO
-16	SO	P10	DM102	-0.94101333333334	Emx-Cre+;DGF/-	Emx-DG-cKO
-16	SO	P10	DM103	51.17030166666668	Emx-Cre+;DGF/-	Emx-DG-cKO
-16	SO	P10	DM104	110.81404100000002	Emx-Cre+;DGF/-	Emx-DG-cKO
-16	SO	P10	DM105	43.10310266666668	Emx-Cre+;DGF/-	Emx-DG-cKO
-16	SO	P10	DM106	59.838259666666666	Emx-Cre+;DGF/-	Emx-DG-cKO
-16	SO	P10	DM107	13.180842000000004	Emx-Cre+;DGF/-	Emx-DG-cKO
-16	SO	P10	DM108	33.93380033333333	Emx-Cre+;DGF/-	Emx-DG-cKO
-16	SO	P10	DM109	-28.57709200000001	Emx-Cre+;DGF/-	Emx-DG-cKO
-16	SO	P10	DM110	65.12577733333332	Emx-Cre+;DGF/-	Emx-DG-cKO
-16	SO	P10	DM111	62.998029666666675	Emx-Cre+;DGF/-	Emx-DG-cKO
-16	SO	P10	DM112	155.47556866666667	Emx-Cre+;DGF/-	Emx-DG-cKO
-16	SO	P10	DM113	60.45801533333333	Emx-Cre+;DGF/-	Emx-DG-cKO
-16	SO	P10	DM114	-31.291961000000015	Emx-Cre+;DGF/-	Emx-DG-cKO
-16	SO	P10	DM115	30.795302666666668	Emx-Cre+;DGF/-	Emx-DG-cKO
-16	SO	P10	DM116	7.335633666666676	Emx-Cre+;DGF/-	Emx-DG-cKO
-16	SO	P10	DM117	55.82664733333334	Emx-Cre+;DGF/-	Emx-DG-cKO
-16	SO	P10	DM118	18.07492666666666	Emx-Cre+;DGF/-	Emx-DG-cKO
-16	SO	P10	DM119	14.529601000000005	Emx-Cre+;DGF/-	Emx-DG-cKO
-16	SO	P10	DM120	22.366472666666652	Emx-Cre+;DGF/+	Emx-DG-Ctrl
-16	SO	P10	DM121	-30.008796666666655	Emx-Cre+;DGF/+	Emx-DG-Ctrl
-16	SO	P10	DM122	-16.793202666666673	Emx-Cre+;DGF/+	Emx-DG-Ctrl
-16	SO	P10	DM123	-27.644905666666677	Emx-Cre+;DGF/+	Emx-DG-Ctrl
-16	SO	P10	DM124	-51.17226066666668	Emx-Cre+;DGF/+	Emx-DG-Ctrl
-16	SO	P10	DM125	-2.9986823333333255	Emx-Cre+;DGF/+	Emx-DG-Ctrl
-16	SO	P10	DM126	-27.112308999999993	Emx-Cre+;DGF/+	Emx-DG-Ctrl
-16	SO	P10	DM127	9.961399	Emx-Cre+;DGF/+	Emx-DG-Ctrl
-16	SO	P10	DM128	-25.710503	Emx-Cre+;DGF/+	Emx-DG-Ctrl
-16	SO	P10	DM129	-33.084088666666666	Emx-Cre+;DGF/+	Emx-DG-Ctrl
-16	SO	P10	DM130	-37.294753333333325	Emx-Cre+;DGF/+	Emx-DG-Ctrl
-16	SO	P10	DM131	-31.042571	Emx-Cre+;DGF/+	Emx-DG-Ctrl
-16	SO	P10	DM132	-66.10877266666668	Emx-Cre+;DGF/+	Emx-DG-Ctrl
-16	SO	P10	DM133	-22.821246666666667	Emx-Cre+;DGF/+	Emx-DG-Ctrl
-16	SO	P10	DM134	-22.293759333333337	Emx-Cre+;DGF/+	Emx-DG-Ctrl
-16	SO	P10	DM135	-14.69683466666667	Emx-Cre+;DGF/+	Emx-DG-Ctrl
-16	SO	P10	DM136	-24.767361000000005	Emx-Cre+;DGF/+	Emx-DG-Ctrl
-16	SO	P10	DM137	-8.056390000000002	Emx-Cre+;DGF/+	Emx-DG-Ctrl
-16	SO	P10	DM138	-15.716071666666673	Emx-Cre+;DGF/+	Emx-DG-Ctrl
-16	SO	P10	DM139	-7.986190000000003	Emx-Cre+;DGF/+	Emx-DG-Ctrl
-16	SO	P10	DM140	-27.721342333333325	Emx-Cre+;DGF/+	Emx-DG-Ctrl
-16	SO	P10	DM141	-53.901615333333346	Emx-Cre+;DGF/+	Emx-DG-Ctrl
-16	SO	P10	DM142	-43.33406800000001	Emx-Cre+;DGF/+	Emx-DG-Ctrl
-16	SO	P10	DM143	-30.54868433333333	Emx-Cre+;DGF/+	Emx-DG-Ctrl
-16	SO	P10	DM144	-12.203698666666668	Emx-Cre+;DGF/+	Emx-DG-Ctrl
-16	SO	P10	DM145	-15.132114333333325	Emx-Cre+;DGF/+	Emx-DG-Ctrl
-16	SO	P10	DM146	-17.898291	Emx-Cre+;DGF/+	Emx-DG-Ctrl
-16	SO	P10	DM147	-27.63213800000001	Emx-Cre+;DGF/+	Emx-DG-Ctrl
-16	SO	P10	DM148	-42.777678	Emx-Cre+;DGF/+	Emx-DG-Ctrl
-16	SO	P10	DM149	-28.66297233333333	Emx-Cre+;DGF/+	Emx-DG-Ctrl
4	SO	P15	DM150	-20.225952666666668	Emx-Cre+;DGF/-	Emx-DG-cKO
4	SO	P15	DM151	-6.914238000000012	Emx-Cre+;DGF/-	Emx-DG-cKO
4	SO	P15	DM152	4.008308666666674	Emx-Cre+;DGF/-	Emx-DG-cKO
4	SO	P15	DM153	-8.128437000000005	Emx-Cre+;DGF/-	Emx-DG-cKO
4	SO	P15	DM154	6.622454000000005	Emx-Cre+;DGF/-	Emx-DG-cKO
4	SO	P15	DM155	-24.02886066666667	Emx-Cre+;DGF/-	Emx-DG-cKO
4	SO	P15	DM156	-9.827623333333326	Emx-Cre+;DGF/-	Emx-DG-cKO
4	SO	P15	DM157	1.1740036666666829	Emx-Cre+;DGF/-	Emx-DG-cKO
4	SO	P15	DM158	9.987145666666663	Emx-Cre+;DGF/-	Emx-DG-cKO
4	SO	P15	DM159	-5.833429333333338	Emx-Cre+;DGF/-	Emx-DG-cKO
4	SO	P15	DM160	3.5972013333333357	Emx-Cre+;DGF/-	Emx-DG-cKO
4	SO	P15	DM161	-26.31464999999999	Emx-Cre+;DGF/-	Emx-DG-cKO
4	SO	P15	DM162	-4.913457333333345	Emx-Cre+;DGF/-	Emx-DG-cKO
4	SO	P15	DM163	10.167373000000007	Emx-Cre+;DGF/-	Emx-DG-cKO
4	SO	P15	DM164	-9.14196933333335	Emx-Cre+;DGF/-	Emx-DG-cKO
4	SO	P15	DM165	6.528905333333332	Emx-Cre+;DGF/-	Emx-DG-cKO
4	SO	P15	DM166	20.534556999999996	Emx-Cre+;DGF/-	Emx-DG-cKO
4	SO	P15	DM167	-32.943493	Emx-Cre+;DGF/-	Emx-DG-cKO
4	SO	P15	DM168	-6.7404243333333325	Emx-Cre+;DGF/-	Emx-DG-cKO
4	SO	P15	DM169	36.666768333333316	Emx-Cre+;DGF/-	Emx-DG-cKO
4	SO	P15	DM170	-13.328699666666656	Emx-Cre+;DGF/-	Emx-DG-cKO
4	SO	P15	DM171	0.9757559999999993	Emx-Cre+;DGF/-	Emx-DG-cKO
4	SO	P15	DM172	14.063572666666667	Emx-Cre+;DGF/-	Emx-DG-cKO
4	SO	P15	DM173	8.22299000000001	Emx-Cre+;DGF/-	Emx-DG-cKO
4	SO	P15	DM174	35.815666666666665	Emx-Cre+;DGF/-	Emx-DG-cKO
4	SO	P15	DM175	48.364723999999995	Emx-Cre+;DGF/-	Emx-DG-cKO
4	SO	P15	DM176	-1.9519236666666586	Emx-Cre+;DGF/-	Emx-DG-cKO
4	SO	P15	DM177	77.9958903333333	Emx-Cre+;DGF/-	Emx-DG-cKO
4	SO	P15	DM178	-23.618342333333356	Emx-Cre+;DGF/-	Emx-DG-cKO
4	SO	P15	DM179	74.02379866666665	Emx-Cre+;DGF/-	Emx-DG-cKO
4	SO	P15	DM180	14.27571900000001	Emx-Cre+;DGF/-	Emx-DG-cKO
4	SO	P15	DM181	-4.566713000000012	Emx-Cre+;DGF/-	Emx-DG-cKO
4	SO	P15	DM182	36.26530466666669	Emx-Cre+;DGF/-	Emx-DG-cKO
4	SO	P15	DM183	17.709602666666655	Emx-Cre+;DGF/-	Emx-DG-cKO
4	SO	P15	DM184	39.664820999999996	Emx-Cre+;DGF/-	Emx-DG-cKO
4	SO	P15	DM185	-34.252956	Emx-Cre+;DGF/-	Emx-DG-cKO
4	SO	P15	DM186	-21.984196000000008	Emx-Cre+;DGF/-	Emx-DG-cKO
4	SO	P15	DM187	9.829257000000004	Emx-Cre+;DGF/-	Emx-DG-cKO
4	SO	P15	DM188	-6.413677999999986	Emx-Cre+;DGF/-	Emx-DG-cKO
4	SO	P15	DM189	-19.947261000000008	Emx-Cre+;DGF/-	Emx-DG-cKO
4	SO	P15	DM190	-32.463879	Emx-Cre+;DGF/-	Emx-DG-cKO
4	SO	P15	DM191	-8.861075333333332	Emx-Cre+;DGF/-	Emx-DG-cKO
4	SO	P15	DM192	-14.648048666666668	Emx-Cre+;DGF/-	Emx-DG-cKO
4	SO	P15	DM193	10.51020966666666	Emx-Cre+;DGF/-	Emx-DG-cKO
4	SO	P15	DM194	-23.647919333333334	Emx-Cre+;DGF/+	Emx-DG-Ctrl
4	SO	P15	DM195	-14.607822333333331	Emx-Cre+;DGF/+	Emx-DG-Ctrl
4	SO	P15	DM196	-13.028608	Emx-Cre+;DGF/+	Emx-DG-Ctrl
4	SO	P15	DM197	-39.14430633333333	Emx-Cre+;DGF/+	Emx-DG-Ctrl
4	SO	P15	DM198	-28.527455333333336	Emx-Cre+;DGF/+	Emx-DG-Ctrl
4	SO	P15	DM199	-4.792497999999995	Emx-Cre+;DGF/+	Emx-DG-Ctrl
4	SO	P15	DM200	-31.883764999999993	Emx-Cre+;DGF/+	Emx-DG-Ctrl
4	SO	P15	DM201	-33.474301	Emx-Cre+;DGF/+	Emx-DG-Ctrl
4	SO	P15	DM202	-22.949276666666673	Emx-Cre+;DGF/+	Emx-DG-Ctrl
4	SO	P15	DM203	-21.115656666666677	Emx-Cre+;DGF/+	Emx-DG-Ctrl
4	SO	P15	DM204	-35.81012799999999	Emx-Cre+;DGF/+	Emx-DG-Ctrl
4	SO	P15	DM205	-48.18157800000002	Emx-Cre+;DGF/+	Emx-DG-Ctrl
4	SO	P15	DM206	14.338076999999998	Emx-Cre+;DGF/+	Emx-DG-Ctrl
4	SO	P15	DM207	-46.418168333333334	Emx-Cre+;DGF/+	Emx-DG-Ctrl
4	SO	P15	DM208	-27.913733666666673	Emx-Cre+;DGF/+	Emx-DG-Ctrl
4	SO	P15	DM209	-29.118385666666672	Emx-Cre+;DGF/+	Emx-DG-Ctrl
4	SO	P15	DM210	-25.973142999999993	Emx-Cre+;DGF/+	Emx-DG-Ctrl
4	SO	P15	DM211	-14.135753666666668	Emx-Cre+;DGF/+	Emx-DG-Ctrl
4	SO	P15	DM212	-23.809857333333337	Emx-Cre+;DGF/+	Emx-DG-Ctrl
4	SO	P15	DM213	-47.091324666666665	Emx-Cre+;DGF/+	Emx-DG-Ctrl
4	SO	P15	DM214	-71.313776	Emx-Cre+;DGF/+	Emx-DG-Ctrl
4	SO	P15	DM215	-54.16754666666666	Emx-Cre+;DGF/+	Emx-DG-Ctrl
4	SO	P15	DM216	-29.905374333333327	Emx-Cre+;DGF/+	Emx-DG-Ctrl
4	SO	P15	DM217	-31.581367999999998	Emx-Cre+;DGF/+	Emx-DG-Ctrl
4	SO	P15	DM218	-51.71759233333333	Emx-Cre+;DGF/+	Emx-DG-Ctrl
4	SO	P15	DM219	-20.562578333333352	Emx-Cre+;DGF/+	Emx-DG-Ctrl
4	SO	P15	DM220	-11.041452666666666	Emx-Cre+;DGF/+	Emx-DG-Ctrl
4	SO	P15	DM221	-20.34598166666667	Emx-Cre+;DGF/+	Emx-DG-Ctrl
4	SO	P15	DM222	-12.51065966666666	Emx-Cre+;DGF/+	Emx-DG-Ctrl
4	SO	P15	DM223	-26.345607333333334	Emx-Cre+;DGF/+	Emx-DG-Ctrl
4	SO	P15	DM224	-19.16379633333334	Emx-Cre+;DGF/+	Emx-DG-Ctrl
4	SO	P15	DM225	-36.492387666666666	Emx-Cre+;DGF/+	Emx-DG-Ctrl
4	SO	P15	DM226	-26.831520666666666	Emx-Cre+;DGF/+	Emx-DG-Ctrl
4	SO	P15	DM227	-31.413788	Emx-Cre+;DGF/+	Emx-DG-Ctrl
4	SO	P15	DM228	-91.19626566666666	Emx-Cre+;DGF/+	Emx-DG-Ctrl
4	SO	P15	DM229	-49.79339633333334	Emx-Cre+;DGF/+	Emx-DG-Ctrl
4	SO	P15	DM230	-39.73528966666665	Emx-Cre+;DGF/+	Emx-DG-Ctrl
4	SO	P15	DM231	-24.177141666666653	Emx-Cre+;DGF/+	Emx-DG-Ctrl
4	SO	P15	DM232	-70.24504300000001	Emx-Cre+;DGF/+	Emx-DG-Ctrl
4	SO	P15	DM233	-23.984539666666677	Emx-Cre+;DGF/+	Emx-DG-Ctrl
4	SO	P15	DM234	-34.513354	Emx-Cre+;DGF/+	Emx-DG-Ctrl
4	SO	P15	DM235	-23.242956666666647	Emx-Cre+;DGF/+	Emx-DG-Ctrl
4	SO	P15	DM236	-35.799207999999986	Emx-Cre+;DGF/+	Emx-DG-Ctrl
4	SO	P15	DM237	-32.79354666666666	Emx-Cre+;DGF/+	Emx-DG-Ctrl
4	SO	P15	DM238	-23.83922633333333	Emx-Cre+;DGF/+	Emx-DG-Ctrl
4	SO	P30	DM239	-103.53908433333335	Emx-Cre+;DGF/-	Emx-DG-cKO
4	SO	P30	DM240	50.34706433333334	Emx-Cre+;DGF/-	Emx-DG-cKO
4	SO	P30	DM241	-83.907829	Emx-Cre+;DGF/-	Emx-DG-cKO
4	SO	P30	DM242	50.90252666666667	Emx-Cre+;DGF/-	Emx-DG-cKO
4	SO	P30	DM243	-42.16829933333332	Emx-Cre+;DGF/-	Emx-DG-cKO
4	SO	P30	DM244	70.48457533333332	Emx-Cre+;DGF/-	Emx-DG-cKO
4	SO	P30	DM245	-12.961375333333345	Emx-Cre+;DGF/-	Emx-DG-cKO
4	SO	P30	DM246	-32.71999966666666	Emx-Cre+;DGF/-	Emx-DG-cKO
4	SO	P30	DM247	-24.286489333333332	Emx-Cre+;DGF/-	Emx-DG-cKO
4	SO	P30	DM248	-35.935895000000016	Emx-Cre+;DGF/-	Emx-DG-cKO
4	SO	P30	DM249	-53.32653633333333	Emx-Cre+;DGF/-	Emx-DG-cKO
4	SO	P30	DM250	172.4816296666667	Emx-Cre+;DGF/-	Emx-DG-cKO
4	SO	P30	DM251	50.15737733333331	Emx-Cre+;DGF/-	Emx-DG-cKO
4	SO	P30	DM252	1.597546333333355	Emx-Cre+;DGF/-	Emx-DG-cKO
4	SO	P30	DM253	48.073131666666676	Emx-Cre+;DGF/-	Emx-DG-cKO
4	SO	P30	DM254	96.44262896666665	Emx-Cre+;DGF/-	Emx-DG-cKO
4	SO	P30	DM255	-29.041672000000005	Emx-Cre+;DGF/-	Emx-DG-cKO
4	SO	P30	DM256	-34.00009266666666	Emx-Cre+;DGF/-	Emx-DG-cKO
4	SO	P30	DM257	-19.947156666666654	Emx-Cre+;DGF/-	Emx-DG-cKO
4	SO	P30	DM258	16.45608299999998	Emx-Cre+;DGF/-	Emx-DG-cKO
4	SO	P30	DM259	31.895863000000002	Emx-Cre+;DGF/-	Emx-DG-cKO
4	SO	P30	DM260	25.95328466666666	Emx-Cre+;DGF/-	Emx-DG-cKO
4	SO	P30	DM261	86.64393466666667	Emx-Cre+;DGF/-	Emx-DG-cKO
4	SO	P30	DM262	45.50346500000003	Emx-Cre+;DGF/-	Emx-DG-cKO
4	SO	P30	DM263	65.68902833333333	Emx-Cre+;DGF/-	Emx-DG-cKO
4	SO	P30	DM264	17.942842333333335	Emx-Cre+;DGF/-	Emx-DG-cKO
4	SO	P30	DM265	50.06442933333335	Emx-Cre+;DGF/-	Emx-DG-cKO
4	SO	P30	DM266	161.41553833333333	Emx-Cre+;DGF/-	Emx-DG-cKO
4	SO	P30	DM267	15.908551999999986	Emx-Cre+;DGF/-	Emx-DG-cKO
4	SO	P30	DM268	131.13589899999997	Emx-Cre+;DGF/-	Emx-DG-cKO
4	SO	P30	DM269	7.730278666666645	Emx-Cre+;DGF/-	Emx-DG-cKO
4	SO	P30	DM270	56.28166199999998	Emx-Cre+;DGF/-	Emx-DG-cKO
4	SO	P30	DM271	14.597978333333344	Emx-Cre+;DGF/-	Emx-DG-cKO
4	SO	P30	DM272	208.63450033333334	Emx-Cre+;DGF/-	Emx-DG-cKO
4	SO	P30	DM273	238.150935	Emx-Cre+;DGF/-	Emx-DG-cKO
4	SO	P30	DM274	-23.090965	Emx-Cre+;DGF/-	Emx-DG-cKO
4	SO	P30	DM275	7.958733999999974	Emx-Cre+;DGF/-	Emx-DG-cKO
4	SO	P30	DM276	123.53001499999999	Emx-Cre+;DGF/-	Emx-DG-cKO
4	SO	P30	DM277	-84.94260366666667	Emx-Cre+;DGF/-	Emx-DG-cKO
4	SO	P30	DM278	-82.899819	Emx-Cre+;DGF/+	Emx-DG-Ctrl
4	SO	P30	DM279	-37.262577333333354	Emx-Cre+;DGF/+	Emx-DG-Ctrl
4	SO	P30	DM280	-84.49987633333332	Emx-Cre+;DGF/+	Emx-DG-Ctrl
4	SO	P30	DM281	-24.361686333333314	Emx-Cre+;DGF/+	Emx-DG-Ctrl
4	SO	P30	DM282	-9.241160999999996	Emx-Cre+;DGF/+	Emx-DG-Ctrl
4	SO	P30	DM283	-70.17323199999998	Emx-Cre+;DGF/+	Emx-DG-Ctrl
4	SO	P30	DM284	-80.48851633333332	Emx-Cre+;DGF/+	Emx-DG-Ctrl
4	SO	P30	DM285	-58.24172533333336	Emx-Cre+;DGF/+	Emx-DG-Ctrl
4	SO	P30	DM286	-54.02550033333333	Emx-Cre+;DGF/+	Emx-DG-Ctrl
4	SO	P30	DM287	-46.20524866666667	Emx-Cre+;DGF/+	Emx-DG-Ctrl
4	SO	P30	DM288	-37.17843066666666	Emx-Cre+;DGF/+	Emx-DG-Ctrl
4	SO	P30	DM289	-80.46934033333334	Emx-Cre+;DGF/+	Emx-DG-Ctrl
4	SO	P30	DM290	42.32483300000001	Emx-Cre+;DGF/+	Emx-DG-Ctrl
4	SO	P30	DM291	-38.31462966666667	Emx-Cre+;DGF/+	Emx-DG-Ctrl
4	SO	P30	DM292	-40.906103666666674	Emx-Cre+;DGF/+	Emx-DG-Ctrl
4	SO	P30	DM293	-67.02271666666668	Emx-Cre+;DGF/+	Emx-DG-Ctrl
4	SO	P30	DM294	-20.653249999999996	Emx-Cre+;DGF/+	Emx-DG-Ctrl
4	SO	P30	DM295	-51.75831133333332	Emx-Cre+;DGF/+	Emx-DG-Ctrl
4	SO	P30	DM296	-76.40589866666669	Emx-Cre+;DGF/+	Emx-DG-Ctrl
4	SO	P30	DM297	-56.466836	Emx-Cre+;DGF/+	Emx-DG-Ctrl
4	SO	P30	DM298	-59.722229666666664	Emx-Cre+;DGF/+	Emx-DG-Ctrl
4	SO	P30	DM299	-25.36784666666667	Emx-Cre+;DGF/+	Emx-DG-Ctrl
4	SO	P30	DM300	-60.894038333333334	Emx-Cre+;DGF/+	Emx-DG-Ctrl
4	SO	P30	DM301	-37.470055	Emx-Cre+;DGF/+	Emx-DG-Ctrl
4	SO	P30	DM302	-30.76026033333333	Emx-Cre+;DGF/+	Emx-DG-Ctrl
4	SO	P30	DM303	-82.08042633333334	Emx-Cre+;DGF/+	Emx-DG-Ctrl
4	SO	P30	DM304	-85.49321933333336	Emx-Cre+;DGF/+	Emx-DG-Ctrl
4	SO	P30	DM305	-36.8201876666667	Emx-Cre+;DGF/+	Emx-DG-Ctrl
4	SO	P30	DM306	-23.615573333333327	Emx-Cre+;DGF/+	Emx-DG-Ctrl
4	SO	P30	DM307	-42.620092666666686	Emx-Cre+;DGF/+	Emx-DG-Ctrl
4	SO	P30	DM308	-30.610949000000023	Emx-Cre+;DGF/+	Emx-DG-Ctrl
4	SO	P30	DM309	-110.68633100000001	Emx-Cre+;DGF/+	Emx-DG-Ctrl
4	SO	P30	DM310	-94.1445543333333	Emx-Cre+;DGF/+	Emx-DG-Ctrl
4	SO	P30	DM311	-64.14806733333334	Emx-Cre+;DGF/+	Emx-DG-Ctrl
4	SO	P30	DM312	-63.031744333333336	Emx-Cre+;DGF/+	Emx-DG-Ctrl
4	SO	P30	DM313	-82.62164933333334	Emx-Cre+;DGF/+	Emx-DG-Ctrl
4	SO	P30	DM314	-75.081476	Emx-Cre+;DGF/+	Emx-DG-Ctrl
4	SO	P30	DM315	-70.82370066666664	Emx-Cre+;DGF/+	Emx-DG-Ctrl
4	SO	P30	DM316	-46.146988	Emx-Cre+;DGF/+	Emx-DG-Ctrl
4	SO	P30	DM317	-78.94156033333336	Emx-Cre+;DGF/+	Emx-DG-Ctrl
4	SO	P30	DM318	-18.121145333333345	Emx-Cre+;DGF/+	Emx-DG-Ctrl
4	SO	P30	DM319	-73.19943599999998	Emx-Cre+;DGF/+	Emx-DG-Ctrl
4	SO	P30	DM320	-63.49026600000002	Emx-Cre+;DGF/+	Emx-DG-Ctrl
4	SO	P30	DM321	-84.96422700000001	Emx-Cre+;DGF/+	Emx-DG-Ctrl
5	SO	P5	DM001	67.43621	Emx-Cre+;DGF/-	Emx-DG-cKO
5	SO	P5	DM002	81.98958866666665	Emx-Cre+;DGF/-	Emx-DG-cKO
5	SO	P5	DM003	63.107744666666655	Emx-Cre+;DGF/-	Emx-DG-cKO
5	SO	P5	DM004	44.54191146666667	Emx-Cre+;DGF/-	Emx-DG-cKO
5	SO	P5	DM005	60.30637533333333	Emx-Cre+;DGF/-	Emx-DG-cKO
5	SO	P5	DM006	24.092572666666666	Emx-Cre+;DGF/-	Emx-DG-cKO
5	SO	P5	DM007	40.2716337	Emx-Cre+;DGF/-	Emx-DG-cKO
5	SO	P5	DM008	34.06347533333332	Emx-Cre+;DGF/-	Emx-DG-cKO
5	SO	P5	DM009	34.52759366666667	Emx-Cre+;DGF/-	Emx-DG-cKO
5	SO	P5	DM010	47.11803966666667	Emx-Cre+;DGF/-	Emx-DG-cKO
5	SO	P5	DM011	27.31988923333334	Emx-Cre+;DGF/-	Emx-DG-cKO
5	SO	P5	DM012	38.769706000000014	Emx-Cre+;DGF/-	Emx-DG-cKO
5	SO	P5	DM013	63.80187833333333	Emx-Cre+;DGF/-	Emx-DG-cKO
5	SO	P5	DM014	119.07987766666666	Emx-Cre+;DGF/-	Emx-DG-cKO
5	SO	P5	DM015	132.997224	Emx-Cre+;DGF/-	Emx-DG-cKO
5	SO	P5	DM016	82.75725133333333	Emx-Cre+;DGF/-	Emx-DG-cKO
5	SO	P5	DM017	106.87124233333331	Emx-Cre+;DGF/-	Emx-DG-cKO
5	SO	P5	DM018	87.08029533333332	Emx-Cre+;DGF/-	Emx-DG-cKO
5	SO	P5	DM019	107.81533500000002	Emx-Cre+;DGF/-	Emx-DG-cKO
5	SO	P5	DM020	44.74954399999999	Emx-Cre+;DGF/-	Emx-DG-cKO
5	SO	P5	DM021	57.715418666666665	Emx-Cre+;DGF/-	Emx-DG-cKO
5	SO	P5	DM022	65.971063	Emx-Cre+;DGF/-	Emx-DG-cKO
5	SO	P5	DM023	96.29749400000001	Emx-Cre+;DGF/-	Emx-DG-cKO
5	SO	P5	DM024	44.19490133333333	Emx-Cre+;DGF/-	Emx-DG-cKO
5	SO	P5	DM025	98.84256400000001	Emx-Cre+;DGF/-	Emx-DG-cKO
5	SO	P5	DM026	169.5400886666667	Emx-Cre+;DGF/-	Emx-DG-cKO
5	SO	P5	DM027	136.94233433333335	Emx-Cre+;DGF/-	Emx-DG-cKO
5	SO	P5	DM028	149.99087566666665	Emx-Cre+;DGF/-	Emx-DG-cKO
5	SO	P5	DM029	101.29213233333333	Emx-Cre+;DGF/-	Emx-DG-cKO
5	SO	P5	DM030	49.927493	Emx-Cre+;DGF/-	Emx-DG-cKO
5	SO	P5	DM031	156.27200200000001	Emx-Cre+;DGF/-	Emx-DG-cKO
5	SO	P5	DM032	13.0056795	Emx-Cre+;DGF/-	Emx-DG-cKO
5	SO	P5	DM033	162.99557	Emx-Cre+;DGF/-	Emx-DG-cKO
5	SO	P5	DM034	138.24172133333332	Emx-Cre+;DGF/-	Emx-DG-cKO
5	SO	P5	DM035	174.60707399999998	Emx-Cre+;DGF/-	Emx-DG-cKO
5	SO	P5	DM036	90.41095800000001	Emx-Cre+;DGF/-	Emx-DG-cKO
5	SO	P5	DM037	178.648169	Emx-Cre+;DGF/-	Emx-DG-cKO
5	SO	P5	DM038	149.11487333333332	Emx-Cre+;DGF/-	Emx-DG-cKO
5	SO	P5	DM039	126.885487	Emx-Cre+;DGF/-	Emx-DG-cKO
5	SO	P5	DM040	61.47591800000001	Emx-Cre+;DGF/-	Emx-DG-cKO
5	SO	P5	DM041	34.962909666666654	Emx-Cre+;DGF/-	Emx-DG-cKO
5	SO	P5	DM042	30.546612999999997	Emx-Cre+;DGF/-	Emx-DG-cKO
5	SO	P5	DM043	24.348307333333327	Emx-Cre+;DGF/-	Emx-DG-cKO
5	SO	P5	DM044	-20.347033999999997	Emx-Cre+;DGF/+	Emx-DG-Ctrl
5	SO	P5	DM045	-8.785578666666671	Emx-Cre+;DGF/+	Emx-DG-Ctrl
5	SO	P5	DM046	27.710260333333338	Emx-Cre+;DGF/+	Emx-DG-Ctrl
5	SO	P5	DM047	33.69248666666667	Emx-Cre+;DGF/+	Emx-DG-Ctrl
5	SO	P5	DM048	34.17855766666667	Emx-Cre+;DGF/+	Emx-DG-Ctrl
5	SO	P5	DM049	2.751648666666682	Emx-Cre+;DGF/+	Emx-DG-Ctrl
5	SO	P5	DM050	-10.537801333333334	Emx-Cre+;DGF/+	Emx-DG-Ctrl
5	SO	P5	DM051	-9.383145333333326	Emx-Cre+;DGF/+	Emx-DG-Ctrl
5	SO	P5	DM052	46.47149933333333	Emx-Cre+;DGF/+	Emx-DG-Ctrl
5	SO	P5	DM053	36.30356233333333	Emx-Cre+;DGF/+	Emx-DG-Ctrl
5	SO	P5	DM054	15.491112333333339	Emx-Cre+;DGF/+	Emx-DG-Ctrl
5	SO	P5	DM055	51.21083733333333	Emx-Cre+;DGF/+	Emx-DG-Ctrl
5	SO	P5	DM056	24.203061666666667	Emx-Cre+;DGF/+	Emx-DG-Ctrl
5	SO	P5	DM057	58.768184333333345	Emx-Cre+;DGF/+	Emx-DG-Ctrl
5	SO	P5	DM058	24.582819	Emx-Cre+;DGF/+	Emx-DG-Ctrl
5	SO	P5	DM059	88.49714766666665	Emx-Cre+;DGF/+	Emx-DG-Ctrl
5	SO	P5	DM060	59.71688166666666	Emx-Cre+;DGF/+	Emx-DG-Ctrl
5	SO	P5	DM061	65.89317333333334	Emx-Cre+;DGF/+	Emx-DG-Ctrl
5	SO	P5	DM062	24.91222	Emx-Cre+;DGF/+	Emx-DG-Ctrl
5	SO	P5	DM063	8.127557999999993	Emx-Cre+;DGF/+	Emx-DG-Ctrl
5	SO	P5	DM064	11.791439666666662	Emx-Cre+;DGF/+	Emx-DG-Ctrl
5	SO	P5	DM065	35.43363866666666	Emx-Cre+;DGF/+	Emx-DG-Ctrl
5	SO	P5	DM066	21.978330666666665	Emx-Cre+;DGF/+	Emx-DG-Ctrl
5	SO	P5	DM067	70.30012266666667	Emx-Cre+;DGF/+	Emx-DG-Ctrl
5	SO	P5	DM068	53.14258333333333	Emx-Cre+;DGF/+	Emx-DG-Ctrl
5	SO	P5	DM069	65.33361766666667	Emx-Cre+;DGF/+	Emx-DG-Ctrl
5	SO	P5	DM070	17.84058700000001	Emx-Cre+;DGF/+	Emx-DG-Ctrl
5	SO	P5	DM071	15.300512666666672	Emx-Cre+;DGF/+	Emx-DG-Ctrl
5	SO	P5	DM072	15.649625999999992	Emx-Cre+;DGF/+	Emx-DG-Ctrl
5	SO	P5	DM073	2.3835083333333196	Emx-Cre+;DGF/+	Emx-DG-Ctrl
5	SO	P5	DM074	37.81381933333333	Emx-Cre+;DGF/+	Emx-DG-Ctrl
5	SO	P5	DM075	47.68418100000002	Emx-Cre+;DGF/+	Emx-DG-Ctrl
-15	SO	P10	DM076	234.64175766666668	Emx-Cre+;DGF/-	Emx-DG-cKO
-15	SO	P10	DM077	104.72925233333335	Emx-Cre+;DGF/-	Emx-DG-cKO
-15	SO	P10	DM078	89.64952366666667	Emx-Cre+;DGF/-	Emx-DG-cKO
-15	SO	P10	DM079	84.15361166666668	Emx-Cre+;DGF/-	Emx-DG-cKO
-15	SO	P10	DM080	118.30403766666664	Emx-Cre+;DGF/-	Emx-DG-cKO
-15	SO	P10	DM081	76.60534533333333	Emx-Cre+;DGF/-	Emx-DG-cKO
-15	SO	P10	DM082	90.09716966666667	Emx-Cre+;DGF/-	Emx-DG-cKO
-15	SO	P10	DM083	80.63924966666667	Emx-Cre+;DGF/-	Emx-DG-cKO
-15	SO	P10	DM084	106.53693833333335	Emx-Cre+;DGF/-	Emx-DG-cKO
-15	SO	P10	DM085	84.08510133333333	Emx-Cre+;DGF/-	Emx-DG-cKO
-15	SO	P10	DM086	80.95610133333334	Emx-Cre+;DGF/-	Emx-DG-cKO
-15	SO	P10	DM087	70.14522299999999	Emx-Cre+;DGF/-	Emx-DG-cKO
-15	SO	P10	DM088	134.14253466666668	Emx-Cre+;DGF/-	Emx-DG-cKO
-15	SO	P10	DM089	51.68647133333334	Emx-Cre+;DGF/-	Emx-DG-cKO
-15	SO	P10	DM090	83.967177	Emx-Cre+;DGF/-	Emx-DG-cKO
-15	SO	P10	DM091	8.386425333333344	Emx-Cre+;DGF/-	Emx-DG-cKO
-15	SO	P10	DM092	90.62217866666667	Emx-Cre+;DGF/-	Emx-DG-cKO
-15	SO	P10	DM093	21.471170666666655	Emx-Cre+;DGF/-	Emx-DG-cKO
-15	SO	P10	DM094	72.29899999999999	Emx-Cre+;DGF/-	Emx-DG-cKO
-15	SO	P10	DM095	34.39845900000001	Emx-Cre+;DGF/-	Emx-DG-cKO
-15	SO	P10	DM096	43.00734933333333	Emx-Cre+;DGF/-	Emx-DG-cKO
-15	SO	P10	DM097	34.19083033333333	Emx-Cre+;DGF/-	Emx-DG-cKO
-15	SO	P10	DM098	116.12723133333333	Emx-Cre+;DGF/-	Emx-DG-cKO
-15	SO	P10	DM099	-10.257797333333334	Emx-Cre+;DGF/-	Emx-DG-cKO
-15	SO	P10	DM100	57.748655000000014	Emx-Cre+;DGF/-	Emx-DG-cKO
-15	SO	P10	DM101	-7.2752590000000055	Emx-Cre+;DGF/-	Emx-DG-cKO
-15	SO	P10	DM102	6.8596533333333225	Emx-Cre+;DGF/-	Emx-DG-cKO
-15	SO	P10	DM103	57.51050166666668	Emx-Cre+;DGF/-	Emx-DG-cKO
-15	SO	P10	DM104	86.367591	Emx-Cre+;DGF/-	Emx-DG-cKO
-15	SO	P10	DM105	39.903536	Emx-Cre+;DGF/-	Emx-DG-cKO
-15	SO	P10	DM106	73.68069299999999	Emx-Cre+;DGF/-	Emx-DG-cKO
-15	SO	P10	DM107	6.918808666666678	Emx-Cre+;DGF/-	Emx-DG-cKO
-15	SO	P10	DM108	24.51198366666667	Emx-Cre+;DGF/-	Emx-DG-cKO
-15	SO	P10	DM109	-7.690208666666668	Emx-Cre+;DGF/-	Emx-DG-cKO
-15	SO	P10	DM110	47.94942733333331	Emx-Cre+;DGF/-	Emx-DG-cKO
-15	SO	P10	DM111	59.598413000000015	Emx-Cre+;DGF/-	Emx-DG-cKO
-15	SO	P10	DM112	168.67833533333334	Emx-Cre+;DGF/-	Emx-DG-cKO
-15	SO	P10	DM113	54.94541533333334	Emx-Cre+;DGF/-	Emx-DG-cKO
-15	SO	P10	DM114	-25.134344333333342	Emx-Cre+;DGF/-	Emx-DG-cKO
-15	SO	P10	DM115	32.23960266666666	Emx-Cre+;DGF/-	Emx-DG-cKO
-15	SO	P10	DM116	11.118933666666672	Emx-Cre+;DGF/-	Emx-DG-cKO
-15	SO	P10	DM117	61.30813066666668	Emx-Cre+;DGF/-	Emx-DG-cKO
-15	SO	P10	DM118	17.308176666666657	Emx-Cre+;DGF/-	Emx-DG-cKO
-15	SO	P10	DM119	18.92876766666667	Emx-Cre+;DGF/-	Emx-DG-cKO
-15	SO	P10	DM120	39.04312266666667	Emx-Cre+;DGF/+	Emx-DG-Ctrl
-15	SO	P10	DM121	-22.24787999999997	Emx-Cre+;DGF/+	Emx-DG-Ctrl
-15	SO	P10	DM122	-15.034552666666684	Emx-Cre+;DGF/+	Emx-DG-Ctrl
-15	SO	P10	DM123	-22.41165566666667	Emx-Cre+;DGF/+	Emx-DG-Ctrl
-15	SO	P10	DM124	-49.452610666666665	Emx-Cre+;DGF/+	Emx-DG-Ctrl
-15	SO	P10	DM125	-3.3777656666666567	Emx-Cre+;DGF/+	Emx-DG-Ctrl
-15	SO	P10	DM126	-29.652959	Emx-Cre+;DGF/+	Emx-DG-Ctrl
-15	SO	P10	DM127	18.923999	Emx-Cre+;DGF/+	Emx-DG-Ctrl
-15	SO	P10	DM128	-18.813952999999987	Emx-Cre+;DGF/+	Emx-DG-Ctrl
-15	SO	P10	DM129	-25.997538666666674	Emx-Cre+;DGF/+	Emx-DG-Ctrl
-15	SO	P10	DM130	-35.58598666666666	Emx-Cre+;DGF/+	Emx-DG-Ctrl
-15	SO	P10	DM131	-34.03370433333334	Emx-Cre+;DGF/+	Emx-DG-Ctrl
-15	SO	P10	DM132	-55.28128933333334	Emx-Cre+;DGF/+	Emx-DG-Ctrl
-15	SO	P10	DM133	-19.11526333333333	Emx-Cre+;DGF/+	Emx-DG-Ctrl
-15	SO	P10	DM134	-23.174742666666663	Emx-Cre+;DGF/+	Emx-DG-Ctrl
-15	SO	P10	DM135	-11.168918	Emx-Cre+;DGF/+	Emx-DG-Ctrl
-15	SO	P10	DM136	-27.457610999999996	Emx-Cre+;DGF/+	Emx-DG-Ctrl
-15	SO	P10	DM137	-12.990039999999999	Emx-Cre+;DGF/+	Emx-DG-Ctrl
-15	SO	P10	DM138	-13.261604999999994	Emx-Cre+;DGF/+	Emx-DG-Ctrl
-15	SO	P10	DM139	-10.00165666666667	Emx-Cre+;DGF/+	Emx-DG-Ctrl
-15	SO	P10	DM140	-31.70299233333331	Emx-Cre+;DGF/+	Emx-DG-Ctrl
-15	SO	P10	DM141	-51.363132000000014	Emx-Cre+;DGF/+	Emx-DG-Ctrl
-15	SO	P10	DM142	-37.972118000000016	Emx-Cre+;DGF/+	Emx-DG-Ctrl
-15	SO	P10	DM143	-29.35001766666667	Emx-Cre+;DGF/+	Emx-DG-Ctrl
-15	SO	P10	DM144	-12.561198666666664	Emx-Cre+;DGF/+	Emx-DG-Ctrl
-15	SO	P10	DM145	-13.888164333333322	Emx-Cre+;DGF/+	Emx-DG-Ctrl
-15	SO	P10	DM146	-11.299557666666658	Emx-Cre+;DGF/+	Emx-DG-Ctrl
-15	SO	P10	DM147	-26.59943800000001	Emx-Cre+;DGF/+	Emx-DG-Ctrl
-15	SO	P10	DM148	-36.890228000000015	Emx-Cre+;DGF/+	Emx-DG-Ctrl
-15	SO	P10	DM149	-25.204388999999992	Emx-Cre+;DGF/+	Emx-DG-Ctrl
5	SO	P15	DM150	-17.53436933333333	Emx-Cre+;DGF/-	Emx-DG-cKO
5	SO	P15	DM151	-2.5619046666666776	Emx-Cre+;DGF/-	Emx-DG-cKO
5	SO	P15	DM152	7.8669586666666715	Emx-Cre+;DGF/-	Emx-DG-cKO
5	SO	P15	DM153	-6.482453666666676	Emx-Cre+;DGF/-	Emx-DG-cKO
5	SO	P15	DM154	-0.1404126666666722	Emx-Cre+;DGF/-	Emx-DG-cKO
5	SO	P15	DM155	-17.144193999999988	Emx-Cre+;DGF/-	Emx-DG-cKO
5	SO	P15	DM156	-6.749339999999999	Emx-Cre+;DGF/-	Emx-DG-cKO
5	SO	P15	DM157	3.492237000000008	Emx-Cre+;DGF/-	Emx-DG-cKO
5	SO	P15	DM158	3.842862333333329	Emx-Cre+;DGF/-	Emx-DG-cKO
5	SO	P15	DM159	-7.001795999999999	Emx-Cre+;DGF/-	Emx-DG-cKO
5	SO	P15	DM160	-0.014298666666671048	Emx-Cre+;DGF/-	Emx-DG-cKO
5	SO	P15	DM161	-22.20848333333333	Emx-Cre+;DGF/-	Emx-DG-cKO
5	SO	P15	DM162	-5.726874	Emx-Cre+;DGF/-	Emx-DG-cKO
5	SO	P15	DM163	13.091206333333332	Emx-Cre+;DGF/-	Emx-DG-cKO
5	SO	P15	DM164	-7.584035999999998	Emx-Cre+;DGF/-	Emx-DG-cKO
5	SO	P15	DM165	3.677888666666661	Emx-Cre+;DGF/-	Emx-DG-cKO
5	SO	P15	DM166	23.18912366666666	Emx-Cre+;DGF/-	Emx-DG-cKO
5	SO	P15	DM167	-31.911109666666672	Emx-Cre+;DGF/-	Emx-DG-cKO
5	SO	P15	DM168	-2.011640999999988	Emx-Cre+;DGF/-	Emx-DG-cKO
5	SO	P15	DM169	23.684751666666653	Emx-Cre+;DGF/-	Emx-DG-cKO
5	SO	P15	DM170	-11.99779966666666	Emx-Cre+;DGF/-	Emx-DG-cKO
5	SO	P15	DM171	26.125556000000017	Emx-Cre+;DGF/-	Emx-DG-cKO
5	SO	P15	DM172	25.622572666666667	Emx-Cre+;DGF/-	Emx-DG-cKO
5	SO	P15	DM173	24.52000666666667	Emx-Cre+;DGF/-	Emx-DG-cKO
5	SO	P15	DM174	32.30115	Emx-Cre+;DGF/-	Emx-DG-cKO
5	SO	P15	DM175	57.491524	Emx-Cre+;DGF/-	Emx-DG-cKO
5	SO	P15	DM176	6.827626333333342	Emx-Cre+;DGF/-	Emx-DG-cKO
5	SO	P15	DM177	113.97480700000001	Emx-Cre+;DGF/-	Emx-DG-cKO
5	SO	P15	DM178	-9.907209000000032	Emx-Cre+;DGF/-	Emx-DG-cKO
5	SO	P15	DM179	63.387265333333325	Emx-Cre+;DGF/-	Emx-DG-cKO
5	SO	P15	DM180	33.04971900000001	Emx-Cre+;DGF/-	Emx-DG-cKO
5	SO	P15	DM181	-14.712363000000002	Emx-Cre+;DGF/-	Emx-DG-cKO
5	SO	P15	DM182	52.929571333333335	Emx-Cre+;DGF/-	Emx-DG-cKO
5	SO	P15	DM183	29.19255266666667	Emx-Cre+;DGF/-	Emx-DG-cKO
5	SO	P15	DM184	52.94502099999999	Emx-Cre+;DGF/-	Emx-DG-cKO
5	SO	P15	DM185	-33.079489333333335	Emx-Cre+;DGF/-	Emx-DG-cKO
5	SO	P15	DM186	-19.24469600000001	Emx-Cre+;DGF/-	Emx-DG-cKO
5	SO	P15	DM187	10.20327366666667	Emx-Cre+;DGF/-	Emx-DG-cKO
5	SO	P15	DM188	-6.668227999999999	Emx-Cre+;DGF/-	Emx-DG-cKO
5	SO	P15	DM189	-11.988844333333333	Emx-Cre+;DGF/-	Emx-DG-cKO
5	SO	P15	DM190	-23.511079	Emx-Cre+;DGF/-	Emx-DG-cKO
5	SO	P15	DM191	-9.160475333333343	Emx-Cre+;DGF/-	Emx-DG-cKO
5	SO	P15	DM192	-9.945665333333332	Emx-Cre+;DGF/-	Emx-DG-cKO
5	SO	P15	DM193	12.620459666666676	Emx-Cre+;DGF/-	Emx-DG-cKO
5	SO	P15	DM194	-20.65255266666667	Emx-Cre+;DGF/+	Emx-DG-Ctrl
5	SO	P15	DM195	-15.934238999999991	Emx-Cre+;DGF/+	Emx-DG-Ctrl
5	SO	P15	DM196	-6.718691333333339	Emx-Cre+;DGF/+	Emx-DG-Ctrl
5	SO	P15	DM197	-29.337239666666665	Emx-Cre+;DGF/+	Emx-DG-Ctrl
5	SO	P15	DM198	-25.653771999999993	Emx-Cre+;DGF/+	Emx-DG-Ctrl
5	SO	P15	DM199	-3.2679980000000057	Emx-Cre+;DGF/+	Emx-DG-Ctrl
5	SO	P15	DM200	-29.772048333333327	Emx-Cre+;DGF/+	Emx-DG-Ctrl
5	SO	P15	DM201	-26.28543433333333	Emx-Cre+;DGF/+	Emx-DG-Ctrl
5	SO	P15	DM202	-16.763426666666675	Emx-Cre+;DGF/+	Emx-DG-Ctrl
5	SO	P15	DM203	-10.65063999999999	Emx-Cre+;DGF/+	Emx-DG-Ctrl
5	SO	P15	DM204	-34.37116133333333	Emx-Cre+;DGF/+	Emx-DG-Ctrl
5	SO	P15	DM205	-38.199811333333344	Emx-Cre+;DGF/+	Emx-DG-Ctrl
5	SO	P15	DM206	27.748543666666666	Emx-Cre+;DGF/+	Emx-DG-Ctrl
5	SO	P15	DM207	-44.367718333333336	Emx-Cre+;DGF/+	Emx-DG-Ctrl
5	SO	P15	DM208	-28.610083666666664	Emx-Cre+;DGF/+	Emx-DG-Ctrl
5	SO	P15	DM209	-27.073269	Emx-Cre+;DGF/+	Emx-DG-Ctrl
5	SO	P15	DM210	-27.150426333333325	Emx-Cre+;DGF/+	Emx-DG-Ctrl
5	SO	P15	DM211	-13.108737	Emx-Cre+;DGF/+	Emx-DG-Ctrl
5	SO	P15	DM212	-15.272590666666673	Emx-Cre+;DGF/+	Emx-DG-Ctrl
5	SO	P15	DM213	-43.481908	Emx-Cre+;DGF/+	Emx-DG-Ctrl
5	SO	P15	DM214	-67.99619266666667	Emx-Cre+;DGF/+	Emx-DG-Ctrl
5	SO	P15	DM215	-52.09042999999999	Emx-Cre+;DGF/+	Emx-DG-Ctrl
5	SO	P15	DM216	-26.867974333333322	Emx-Cre+;DGF/+	Emx-DG-Ctrl
5	SO	P15	DM217	-27.55643466666668	Emx-Cre+;DGF/+	Emx-DG-Ctrl
5	SO	P15	DM218	-32.73529233333333	Emx-Cre+;DGF/+	Emx-DG-Ctrl
5	SO	P15	DM219	-22.109395000000006	Emx-Cre+;DGF/+	Emx-DG-Ctrl
5	SO	P15	DM220	-10.329035999999993	Emx-Cre+;DGF/+	Emx-DG-Ctrl
5	SO	P15	DM221	-18.18891500000001	Emx-Cre+;DGF/+	Emx-DG-Ctrl
5	SO	P15	DM222	-12.315776333333332	Emx-Cre+;DGF/+	Emx-DG-Ctrl
5	SO	P15	DM223	-29.116424000000006	Emx-Cre+;DGF/+	Emx-DG-Ctrl
5	SO	P15	DM224	-20.28299633333333	Emx-Cre+;DGF/+	Emx-DG-Ctrl
5	SO	P15	DM225	-29.93645433333333	Emx-Cre+;DGF/+	Emx-DG-Ctrl
5	SO	P15	DM226	-27.801970666666666	Emx-Cre+;DGF/+	Emx-DG-Ctrl
5	SO	P15	DM227	-30.230704666666664	Emx-Cre+;DGF/+	Emx-DG-Ctrl
5	SO	P15	DM228	-82.03933233333333	Emx-Cre+;DGF/+	Emx-DG-Ctrl
5	SO	P15	DM229	-42.835996333333334	Emx-Cre+;DGF/+	Emx-DG-Ctrl
5	SO	P15	DM230	-30.47885633333333	Emx-Cre+;DGF/+	Emx-DG-Ctrl
5	SO	P15	DM231	-26.557124999999996	Emx-Cre+;DGF/+	Emx-DG-Ctrl
5	SO	P15	DM232	-64.898743	Emx-Cre+;DGF/+	Emx-DG-Ctrl
5	SO	P15	DM233	-21.651372999999996	Emx-Cre+;DGF/+	Emx-DG-Ctrl
5	SO	P15	DM234	-29.355854000000004	Emx-Cre+;DGF/+	Emx-DG-Ctrl
5	SO	P15	DM235	-21.804839999999995	Emx-Cre+;DGF/+	Emx-DG-Ctrl
5	SO	P15	DM236	-35.711757999999996	Emx-Cre+;DGF/+	Emx-DG-Ctrl
5	SO	P15	DM237	-27.172096666666658	Emx-Cre+;DGF/+	Emx-DG-Ctrl
5	SO	P15	DM238	-21.977226333333334	Emx-Cre+;DGF/+	Emx-DG-Ctrl
5	SO	P30	DM239	-93.21216766666667	Emx-Cre+;DGF/-	Emx-DG-cKO
5	SO	P30	DM240	56.413230999999996	Emx-Cre+;DGF/-	Emx-DG-cKO
5	SO	P30	DM241	-81.26594566666667	Emx-Cre+;DGF/-	Emx-DG-cKO
5	SO	P30	DM242	49.50029333333337	Emx-Cre+;DGF/-	Emx-DG-cKO
5	SO	P30	DM243	-40.21711600000001	Emx-Cre+;DGF/-	Emx-DG-cKO
5	SO	P30	DM244	63.89645866666668	Emx-Cre+;DGF/-	Emx-DG-cKO
5	SO	P30	DM245	1.9011579999999906	Emx-Cre+;DGF/-	Emx-DG-cKO
5	SO	P30	DM246	-24.413049666666666	Emx-Cre+;DGF/-	Emx-DG-cKO
5	SO	P30	DM247	-12.089972666666654	Emx-Cre+;DGF/-	Emx-DG-cKO
5	SO	P30	DM248	-54.53196166666667	Emx-Cre+;DGF/-	Emx-DG-cKO
5	SO	P30	DM249	-38.69986966666664	Emx-Cre+;DGF/-	Emx-DG-cKO
5	SO	P30	DM250	181.99167966666673	Emx-Cre+;DGF/-	Emx-DG-cKO
5	SO	P30	DM251	54.87819399999997	Emx-Cre+;DGF/-	Emx-DG-cKO
5	SO	P30	DM252	5.619962999999984	Emx-Cre+;DGF/-	Emx-DG-cKO
5	SO	P30	DM253	36.20664833333334	Emx-Cre+;DGF/-	Emx-DG-cKO
5	SO	P30	DM254	135.50287229999998	Emx-Cre+;DGF/-	Emx-DG-cKO
5	SO	P30	DM255	-24.694555333333312	Emx-Cre+;DGF/-	Emx-DG-cKO
5	SO	P30	DM256	-41.97704266666668	Emx-Cre+;DGF/-	Emx-DG-cKO
5	SO	P30	DM257	-8.955456666666654	Emx-Cre+;DGF/-	Emx-DG-cKO
5	SO	P30	DM258	17.84983299999999	Emx-Cre+;DGF/-	Emx-DG-cKO
5	SO	P30	DM259	63.30252966666666	Emx-Cre+;DGF/-	Emx-DG-cKO
5	SO	P30	DM260	34.05588466666666	Emx-Cre+;DGF/-	Emx-DG-cKO
5	SO	P30	DM261	121.79858466666667	Emx-Cre+;DGF/-	Emx-DG-cKO
5	SO	P30	DM262	53.88228166666668	Emx-Cre+;DGF/-	Emx-DG-cKO
5	SO	P30	DM263	76.468195	Emx-Cre+;DGF/-	Emx-DG-cKO
5	SO	P30	DM264	41.33629233333335	Emx-Cre+;DGF/-	Emx-DG-cKO
5	SO	P30	DM265	32.039579333333315	Emx-Cre+;DGF/-	Emx-DG-cKO
5	SO	P30	DM266	169.43047166666665	Emx-Cre+;DGF/-	Emx-DG-cKO
5	SO	P30	DM267	18.652835333333332	Emx-Cre+;DGF/-	Emx-DG-cKO
5	SO	P30	DM268	162.94641566666664	Emx-Cre+;DGF/-	Emx-DG-cKO
5	SO	P30	DM269	39.871261999999966	Emx-Cre+;DGF/-	Emx-DG-cKO
5	SO	P30	DM270	45.048812	Emx-Cre+;DGF/-	Emx-DG-cKO
5	SO	P30	DM271	43.12952833333335	Emx-Cre+;DGF/-	Emx-DG-cKO
5	SO	P30	DM272	188.68331700000002	Emx-Cre+;DGF/-	Emx-DG-cKO
5	SO	P30	DM273	319.16505166666667	Emx-Cre+;DGF/-	Emx-DG-cKO
5	SO	P30	DM274	-14.822581666666679	Emx-Cre+;DGF/-	Emx-DG-cKO
5	SO	P30	DM275	16.785300666666654	Emx-Cre+;DGF/-	Emx-DG-cKO
5	SO	P30	DM276	126.46471500000001	Emx-Cre+;DGF/-	Emx-DG-cKO
5	SO	P30	DM277	-76.99720366666666	Emx-Cre+;DGF/-	Emx-DG-cKO
5	SO	P30	DM278	-65.44246900000002	Emx-Cre+;DGF/+	Emx-DG-Ctrl
5	SO	P30	DM279	-42.86044400000001	Emx-Cre+;DGF/+	Emx-DG-Ctrl
5	SO	P30	DM280	-79.56070966666665	Emx-Cre+;DGF/+	Emx-DG-Ctrl
5	SO	P30	DM281	-29.84433633333333	Emx-Cre+;DGF/+	Emx-DG-Ctrl
5	SO	P30	DM282	-15.374277666666671	Emx-Cre+;DGF/+	Emx-DG-Ctrl
5	SO	P30	DM283	-70.59693200000001	Emx-Cre+;DGF/+	Emx-DG-Ctrl
5	SO	P30	DM284	-77.78713299999998	Emx-Cre+;DGF/+	Emx-DG-Ctrl
5	SO	P30	DM285	-52.25625866666667	Emx-Cre+;DGF/+	Emx-DG-Ctrl
5	SO	P30	DM286	-43.22928366666668	Emx-Cre+;DGF/+	Emx-DG-Ctrl
5	SO	P30	DM287	-42.259148666666675	Emx-Cre+;DGF/+	Emx-DG-Ctrl
5	SO	P30	DM288	-37.070013999999986	Emx-Cre+;DGF/+	Emx-DG-Ctrl
5	SO	P30	DM289	-62.86317366666668	Emx-Cre+;DGF/+	Emx-DG-Ctrl
5	SO	P30	DM290	33.555466333333335	Emx-Cre+;DGF/+	Emx-DG-Ctrl
5	SO	P30	DM291	-29.07269633333334	Emx-Cre+;DGF/+	Emx-DG-Ctrl
5	SO	P30	DM292	-30.097187	Emx-Cre+;DGF/+	Emx-DG-Ctrl
5	SO	P30	DM293	-59.69948333333335	Emx-Cre+;DGF/+	Emx-DG-Ctrl
5	SO	P30	DM294	-7.640066666666655	Emx-Cre+;DGF/+	Emx-DG-Ctrl
5	SO	P30	DM295	-42.740894666666655	Emx-Cre+;DGF/+	Emx-DG-Ctrl
5	SO	P30	DM296	-72.85454866666667	Emx-Cre+;DGF/+	Emx-DG-Ctrl
5	SO	P30	DM297	-58.72371933333334	Emx-Cre+;DGF/+	Emx-DG-Ctrl
5	SO	P30	DM298	-48.55854633333334	Emx-Cre+;DGF/+	Emx-DG-Ctrl
5	SO	P30	DM299	-23.178829999999994	Emx-Cre+;DGF/+	Emx-DG-Ctrl
5	SO	P30	DM300	-49.960021666666684	Emx-Cre+;DGF/+	Emx-DG-Ctrl
5	SO	P30	DM301	-39.42893833333335	Emx-Cre+;DGF/+	Emx-DG-Ctrl
5	SO	P30	DM302	-28.201043666666674	Emx-Cre+;DGF/+	Emx-DG-Ctrl
5	SO	P30	DM303	-82.79877633333335	Emx-Cre+;DGF/+	Emx-DG-Ctrl
5	SO	P30	DM304	-76.76615266666668	Emx-Cre+;DGF/+	Emx-DG-Ctrl
5	SO	P30	DM305	-41.957754333333355	Emx-Cre+;DGF/+	Emx-DG-Ctrl
5	SO	P30	DM306	-25.829673333333336	Emx-Cre+;DGF/+	Emx-DG-Ctrl
5	SO	P30	DM307	-39.87120933333333	Emx-Cre+;DGF/+	Emx-DG-Ctrl
5	SO	P30	DM308	-29.33964899999999	Emx-Cre+;DGF/+	Emx-DG-Ctrl
5	SO	P30	DM309	-96.70961433333333	Emx-Cre+;DGF/+	Emx-DG-Ctrl
5	SO	P30	DM310	-97.99202099999998	Emx-Cre+;DGF/+	Emx-DG-Ctrl
5	SO	P30	DM311	-59.75008400000001	Emx-Cre+;DGF/+	Emx-DG-Ctrl
5	SO	P30	DM312	-61.296511	Emx-Cre+;DGF/+	Emx-DG-Ctrl
5	SO	P30	DM313	-74.59258266666664	Emx-Cre+;DGF/+	Emx-DG-Ctrl
5	SO	P30	DM314	-74.74504266666666	Emx-Cre+;DGF/+	Emx-DG-Ctrl
5	SO	P30	DM315	-75.67085066666665	Emx-Cre+;DGF/+	Emx-DG-Ctrl
5	SO	P30	DM316	-40.04338799999999	Emx-Cre+;DGF/+	Emx-DG-Ctrl
5	SO	P30	DM317	-75.14722700000003	Emx-Cre+;DGF/+	Emx-DG-Ctrl
5	SO	P30	DM318	1.4116213333333387	Emx-Cre+;DGF/+	Emx-DG-Ctrl
5	SO	P30	DM319	-68.61955266666665	Emx-Cre+;DGF/+	Emx-DG-Ctrl
5	SO	P30	DM320	-54.33578266666666	Emx-Cre+;DGF/+	Emx-DG-Ctrl
5	SO	P30	DM321	-78.54826033333332	Emx-Cre+;DGF/+	Emx-DG-Ctrl
6	SO	P5	DM001	81.46064333333332	Emx-Cre+;DGF/-	Emx-DG-cKO
6	SO	P5	DM002	84.149772	Emx-Cre+;DGF/-	Emx-DG-cKO
6	SO	P5	DM003	60.45262799999998	Emx-Cre+;DGF/-	Emx-DG-cKO
6	SO	P5	DM004	41.7918898	Emx-Cre+;DGF/-	Emx-DG-cKO
6	SO	P5	DM005	65.44210866666667	Emx-Cre+;DGF/-	Emx-DG-cKO
6	SO	P5	DM006	15.558272666666653	Emx-Cre+;DGF/-	Emx-DG-cKO
6	SO	P5	DM007	38.46217536666667	Emx-Cre+;DGF/-	Emx-DG-cKO
6	SO	P5	DM008	43.228792	Emx-Cre+;DGF/-	Emx-DG-cKO
6	SO	P5	DM009	32.42323533333333	Emx-Cre+;DGF/-	Emx-DG-cKO
6	SO	P5	DM010	34.018723	Emx-Cre+;DGF/-	Emx-DG-cKO
6	SO	P5	DM011	22.174460900000003	Emx-Cre+;DGF/-	Emx-DG-cKO
6	SO	P5	DM012	49.301406	Emx-Cre+;DGF/-	Emx-DG-cKO
6	SO	P5	DM013	70.72421166666666	Emx-Cre+;DGF/-	Emx-DG-cKO
6	SO	P5	DM014	119.38384433333336	Emx-Cre+;DGF/-	Emx-DG-cKO
6	SO	P5	DM015	133.36199066666666	Emx-Cre+;DGF/-	Emx-DG-cKO
6	SO	P5	DM016	71.34646800000002	Emx-Cre+;DGF/-	Emx-DG-cKO
6	SO	P5	DM017	106.21710899999998	Emx-Cre+;DGF/-	Emx-DG-cKO
6	SO	P5	DM018	99.23092866666667	Emx-Cre+;DGF/-	Emx-DG-cKO
6	SO	P5	DM019	123.71135166666669	Emx-Cre+;DGF/-	Emx-DG-cKO
6	SO	P5	DM020	59.94119399999999	Emx-Cre+;DGF/-	Emx-DG-cKO
6	SO	P5	DM021	58.19943533333333	Emx-Cre+;DGF/-	Emx-DG-cKO
6	SO	P5	DM022	66.33329633333334	Emx-Cre+;DGF/-	Emx-DG-cKO
6	SO	P5	DM023	87.612144	Emx-Cre+;DGF/-	Emx-DG-cKO
6	SO	P5	DM024	39.68225133333333	Emx-Cre+;DGF/-	Emx-DG-cKO
6	SO	P5	DM025	96.53233066666668	Emx-Cre+;DGF/-	Emx-DG-cKO
6	SO	P5	DM026	181.29278866666667	Emx-Cre+;DGF/-	Emx-DG-cKO
6	SO	P5	DM027	139.50931766666665	Emx-Cre+;DGF/-	Emx-DG-cKO
6	SO	P5	DM028	168.45965900000002	Emx-Cre+;DGF/-	Emx-DG-cKO
6	SO	P5	DM029	104.59684899999999	Emx-Cre+;DGF/-	Emx-DG-cKO
6	SO	P5	DM030	52.882193	Emx-Cre+;DGF/-	Emx-DG-cKO
6	SO	P5	DM031	164.81581866666664	Emx-Cre+;DGF/-	Emx-DG-cKO
6	SO	P5	DM032	14.89957783333333	Emx-Cre+;DGF/-	Emx-DG-cKO
6	SO	P5	DM033	159.93728666666667	Emx-Cre+;DGF/-	Emx-DG-cKO
6	SO	P5	DM034	154.94220466666667	Emx-Cre+;DGF/-	Emx-DG-cKO
6	SO	P5	DM035	194.03125733333334	Emx-Cre+;DGF/-	Emx-DG-cKO
6	SO	P5	DM036	84.23069133333333	Emx-Cre+;DGF/-	Emx-DG-cKO
6	SO	P5	DM037	172.10875233333334	Emx-Cre+;DGF/-	Emx-DG-cKO
6	SO	P5	DM038	135.06204	Emx-Cre+;DGF/-	Emx-DG-cKO
6	SO	P5	DM039	123.69635366666664	Emx-Cre+;DGF/-	Emx-DG-cKO
6	SO	P5	DM040	62.84150133333335	Emx-Cre+;DGF/-	Emx-DG-cKO
6	SO	P5	DM041	39.99862633333334	Emx-Cre+;DGF/-	Emx-DG-cKO
6	SO	P5	DM042	27.667063000000013	Emx-Cre+;DGF/-	Emx-DG-cKO
6	SO	P5	DM043	23.524923999999988	Emx-Cre+;DGF/-	Emx-DG-cKO
6	SO	P5	DM044	-18.504367333333345	Emx-Cre+;DGF/+	Emx-DG-Ctrl
6	SO	P5	DM045	-4.331528666666666	Emx-Cre+;DGF/+	Emx-DG-Ctrl
6	SO	P5	DM046	33.59742699999999	Emx-Cre+;DGF/+	Emx-DG-Ctrl
6	SO	P5	DM047	30.10393666666668	Emx-Cre+;DGF/+	Emx-DG-Ctrl
6	SO	P5	DM048	33.135374333333345	Emx-Cre+;DGF/+	Emx-DG-Ctrl
6	SO	P5	DM049	4.099515333333358	Emx-Cre+;DGF/+	Emx-DG-Ctrl
6	SO	P5	DM050	-4.6350846666666525	Emx-Cre+;DGF/+	Emx-DG-Ctrl
6	SO	P5	DM051	-10.062395333333333	Emx-Cre+;DGF/+	Emx-DG-Ctrl
6	SO	P5	DM052	41.65576599999998	Emx-Cre+;DGF/+	Emx-DG-Ctrl
6	SO	P5	DM053	48.588479	Emx-Cre+;DGF/+	Emx-DG-Ctrl
6	SO	P5	DM054	12.915995666666683	Emx-Cre+;DGF/+	Emx-DG-Ctrl
6	SO	P5	DM055	57.73913733333333	Emx-Cre+;DGF/+	Emx-DG-Ctrl
6	SO	P5	DM056	23.671195	Emx-Cre+;DGF/+	Emx-DG-Ctrl
6	SO	P5	DM057	60.597551	Emx-Cre+;DGF/+	Emx-DG-Ctrl
6	SO	P5	DM058	23.056102333333342	Emx-Cre+;DGF/+	Emx-DG-Ctrl
6	SO	P5	DM059	96.738331	Emx-Cre+;DGF/+	Emx-DG-Ctrl
6	SO	P5	DM060	59.829581666666655	Emx-Cre+;DGF/+	Emx-DG-Ctrl
6	SO	P5	DM061	65.29132333333332	Emx-Cre+;DGF/+	Emx-DG-Ctrl
6	SO	P5	DM062	27.16918666666666	Emx-Cre+;DGF/+	Emx-DG-Ctrl
6	SO	P5	DM063	10.124307999999994	Emx-Cre+;DGF/+	Emx-DG-Ctrl
6	SO	P5	DM064	11.655723000000004	Emx-Cre+;DGF/+	Emx-DG-Ctrl
6	SO	P5	DM065	28.930671999999998	Emx-Cre+;DGF/+	Emx-DG-Ctrl
6	SO	P5	DM066	26.28359733333333	Emx-Cre+;DGF/+	Emx-DG-Ctrl
6	SO	P5	DM067	74.48942266666666	Emx-Cre+;DGF/+	Emx-DG-Ctrl
6	SO	P5	DM068	58.85551666666668	Emx-Cre+;DGF/+	Emx-DG-Ctrl
6	SO	P5	DM069	72.637451	Emx-Cre+;DGF/+	Emx-DG-Ctrl
6	SO	P5	DM070	27.552703666666662	Emx-Cre+;DGF/+	Emx-DG-Ctrl
6	SO	P5	DM071	16.499079333333338	Emx-Cre+;DGF/+	Emx-DG-Ctrl
6	SO	P5	DM072	17.218809333333336	Emx-Cre+;DGF/+	Emx-DG-Ctrl
6	SO	P5	DM073	-1.2879916666666702	Emx-Cre+;DGF/+	Emx-DG-Ctrl
6	SO	P5	DM074	46.429619333333335	Emx-Cre+;DGF/+	Emx-DG-Ctrl
6	SO	P5	DM075	49.18536433333335	Emx-Cre+;DGF/+	Emx-DG-Ctrl
-14	SO	P10	DM076	260.33359099999996	Emx-Cre+;DGF/-	Emx-DG-cKO
-14	SO	P10	DM077	120.10605233333332	Emx-Cre+;DGF/-	Emx-DG-cKO
-14	SO	P10	DM078	92.22247366666666	Emx-Cre+;DGF/-	Emx-DG-cKO
-14	SO	P10	DM079	90.05071166666664	Emx-Cre+;DGF/-	Emx-DG-cKO
-14	SO	P10	DM080	113.88910433333335	Emx-Cre+;DGF/-	Emx-DG-cKO
-14	SO	P10	DM081	78.01494533333334	Emx-Cre+;DGF/-	Emx-DG-cKO
-14	SO	P10	DM082	102.09098633333336	Emx-Cre+;DGF/-	Emx-DG-cKO
-14	SO	P10	DM083	101.341933	Emx-Cre+;DGF/-	Emx-DG-cKO
-14	SO	P10	DM084	118.68350500000001	Emx-Cre+;DGF/-	Emx-DG-cKO
-14	SO	P10	DM085	74.85026799999999	Emx-Cre+;DGF/-	Emx-DG-cKO
-14	SO	P10	DM086	86.40133466666667	Emx-Cre+;DGF/-	Emx-DG-cKO
-14	SO	P10	DM087	68.130723	Emx-Cre+;DGF/-	Emx-DG-cKO
-14	SO	P10	DM088	154.56150133333333	Emx-Cre+;DGF/-	Emx-DG-cKO
-14	SO	P10	DM089	47.80710466666667	Emx-Cre+;DGF/-	Emx-DG-cKO
-14	SO	P10	DM090	89.17117700000001	Emx-Cre+;DGF/-	Emx-DG-cKO
-14	SO	P10	DM091	9.362608666666668	Emx-Cre+;DGF/-	Emx-DG-cKO
-14	SO	P10	DM092	109.871212	Emx-Cre+;DGF/-	Emx-DG-cKO
-14	SO	P10	DM093	25.412053999999994	Emx-Cre+;DGF/-	Emx-DG-cKO
-14	SO	P10	DM094	70.27771666666668	Emx-Cre+;DGF/-	Emx-DG-cKO
-14	SO	P10	DM095	37.615559	Emx-Cre+;DGF/-	Emx-DG-cKO
-14	SO	P10	DM096	30.409266000000002	Emx-Cre+;DGF/-	Emx-DG-cKO
-14	SO	P10	DM097	25.631063666666666	Emx-Cre+;DGF/-	Emx-DG-cKO
-14	SO	P10	DM098	135.0488313333333	Emx-Cre+;DGF/-	Emx-DG-cKO
-14	SO	P10	DM099	-0.7534306666666737	Emx-Cre+;DGF/-	Emx-DG-cKO
-14	SO	P10	DM100	58.01903833333333	Emx-Cre+;DGF/-	Emx-DG-cKO
-14	SO	P10	DM101	-6.907125666666673	Emx-Cre+;DGF/-	Emx-DG-cKO
-14	SO	P10	DM102	9.34765333333334	Emx-Cre+;DGF/-	Emx-DG-cKO
-14	SO	P10	DM103	48.00246833333333	Emx-Cre+;DGF/-	Emx-DG-cKO
-14	SO	P10	DM104	82.03437433333333	Emx-Cre+;DGF/-	Emx-DG-cKO
-14	SO	P10	DM105	59.65818600000001	Emx-Cre+;DGF/-	Emx-DG-cKO
-14	SO	P10	DM106	84.76825966666665	Emx-Cre+;DGF/-	Emx-DG-cKO
-14	SO	P10	DM107	7.811092000000002	Emx-Cre+;DGF/-	Emx-DG-cKO
-14	SO	P10	DM108	34.93738366666667	Emx-Cre+;DGF/-	Emx-DG-cKO
-14	SO	P10	DM109	-19.96600866666667	Emx-Cre+;DGF/-	Emx-DG-cKO
-14	SO	P10	DM110	40.77377733333333	Emx-Cre+;DGF/-	Emx-DG-cKO
-14	SO	P10	DM111	68.21302966666667	Emx-Cre+;DGF/-	Emx-DG-cKO
-14	SO	P10	DM112	156.05398533333332	Emx-Cre+;DGF/-	Emx-DG-cKO
-14	SO	P10	DM113	59.258015333333326	Emx-Cre+;DGF/-	Emx-DG-cKO
-14	SO	P10	DM114	-2.7231276666666795	Emx-Cre+;DGF/-	Emx-DG-cKO
-14	SO	P10	DM115	26.04671933333334	Emx-Cre+;DGF/-	Emx-DG-cKO
-14	SO	P10	DM116	15.895217000000002	Emx-Cre+;DGF/-	Emx-DG-cKO
-14	SO	P10	DM117	64.974564	Emx-Cre+;DGF/-	Emx-DG-cKO
-14	SO	P10	DM118	24.32951	Emx-Cre+;DGF/-	Emx-DG-cKO
-14	SO	P10	DM119	32.21593433333334	Emx-Cre+;DGF/-	Emx-DG-cKO
-14	SO	P10	DM120	38.513055999999985	Emx-Cre+;DGF/+	Emx-DG-Ctrl
-14	SO	P10	DM121	-22.216963333333315	Emx-Cre+;DGF/+	Emx-DG-Ctrl
-14	SO	P10	DM122	-12.281369333333345	Emx-Cre+;DGF/+	Emx-DG-Ctrl
-14	SO	P10	DM123	-13.643489000000026	Emx-Cre+;DGF/+	Emx-DG-Ctrl
-14	SO	P10	DM124	-45.40559400000001	Emx-Cre+;DGF/+	Emx-DG-Ctrl
-14	SO	P10	DM125	2.953734333333349	Emx-Cre+;DGF/+	Emx-DG-Ctrl
-14	SO	P10	DM126	-26.851808999999992	Emx-Cre+;DGF/+	Emx-DG-Ctrl
-14	SO	P10	DM127	10.440398999999994	Emx-Cre+;DGF/+	Emx-DG-Ctrl
-14	SO	P10	DM128	-16.992586333333332	Emx-Cre+;DGF/+	Emx-DG-Ctrl
-14	SO	P10	DM129	-21.817671999999998	Emx-Cre+;DGF/+	Emx-DG-Ctrl
-14	SO	P10	DM130	-39.31783666666667	Emx-Cre+;DGF/+	Emx-DG-Ctrl
-14	SO	P10	DM131	-36.01565433333334	Emx-Cre+;DGF/+	Emx-DG-Ctrl
-14	SO	P10	DM132	-44.747355999999996	Emx-Cre+;DGF/+	Emx-DG-Ctrl
-14	SO	P10	DM133	-15.651080000000007	Emx-Cre+;DGF/+	Emx-DG-Ctrl
-14	SO	P10	DM134	-14.855425999999994	Emx-Cre+;DGF/+	Emx-DG-Ctrl
-14	SO	P10	DM135	-15.044334666666686	Emx-Cre+;DGF/+	Emx-DG-Ctrl
-14	SO	P10	DM136	-26.383277666666668	Emx-Cre+;DGF/+	Emx-DG-Ctrl
-14	SO	P10	DM137	-7.942306666666657	Emx-Cre+;DGF/+	Emx-DG-Ctrl
-14	SO	P10	DM138	-15.099238333333346	Emx-Cre+;DGF/+	Emx-DG-Ctrl
-14	SO	P10	DM139	-12.308940000000007	Emx-Cre+;DGF/+	Emx-DG-Ctrl
-14	SO	P10	DM140	-27.18909233333334	Emx-Cre+;DGF/+	Emx-DG-Ctrl
-14	SO	P10	DM141	-39.34628200000001	Emx-Cre+;DGF/+	Emx-DG-Ctrl
-14	SO	P10	DM142	-36.396818	Emx-Cre+;DGF/+	Emx-DG-Ctrl
-14	SO	P10	DM143	-22.666017666666665	Emx-Cre+;DGF/+	Emx-DG-Ctrl
-14	SO	P10	DM144	-14.289115333333333	Emx-Cre+;DGF/+	Emx-DG-Ctrl
-14	SO	P10	DM145	-11.335864333333328	Emx-Cre+;DGF/+	Emx-DG-Ctrl
-14	SO	P10	DM146	2.761792333333337	Emx-Cre+;DGF/+	Emx-DG-Ctrl
-14	SO	P10	DM147	-21.122138000000007	Emx-Cre+;DGF/+	Emx-DG-Ctrl
-14	SO	P10	DM148	-35.88884466666668	Emx-Cre+;DGF/+	Emx-DG-Ctrl
-14	SO	P10	DM149	-22.88272233333333	Emx-Cre+;DGF/+	Emx-DG-Ctrl
6	SO	P15	DM150	-12.017786000000001	Emx-Cre+;DGF/-	Emx-DG-cKO
6	SO	P15	DM151	-3.730404666666672	Emx-Cre+;DGF/-	Emx-DG-cKO
6	SO	P15	DM152	14.45214199999999	Emx-Cre+;DGF/-	Emx-DG-cKO
6	SO	P15	DM153	0.12014633333332843	Emx-Cre+;DGF/-	Emx-DG-cKO
6	SO	P15	DM154	-0.18537933333332526	Emx-Cre+;DGF/-	Emx-DG-cKO
6	SO	P15	DM155	-9.697943999999987	Emx-Cre+;DGF/-	Emx-DG-cKO
6	SO	P15	DM156	-6.349290000000006	Emx-Cre+;DGF/-	Emx-DG-cKO
6	SO	P15	DM157	6.379337000000021	Emx-Cre+;DGF/-	Emx-DG-cKO
6	SO	P15	DM158	7.206478999999992	Emx-Cre+;DGF/-	Emx-DG-cKO
6	SO	P15	DM159	-6.2595959999999975	Emx-Cre+;DGF/-	Emx-DG-cKO
6	SO	P15	DM160	-0.004881999999999683	Emx-Cre+;DGF/-	Emx-DG-cKO
6	SO	P15	DM161	-9.035066666666657	Emx-Cre+;DGF/-	Emx-DG-cKO
6	SO	P15	DM162	-5.989874000000015	Emx-Cre+;DGF/-	Emx-DG-cKO
6	SO	P15	DM163	20.195623	Emx-Cre+;DGF/-	Emx-DG-cKO
6	SO	P15	DM164	4.5420306666666574	Emx-Cre+;DGF/-	Emx-DG-cKO
6	SO	P15	DM165	16.530405333333324	Emx-Cre+;DGF/-	Emx-DG-cKO
6	SO	P15	DM166	32.01647366666666	Emx-Cre+;DGF/-	Emx-DG-cKO
6	SO	P15	DM167	-24.765326333333338	Emx-Cre+;DGF/-	Emx-DG-cKO
6	SO	P15	DM168	12.061909000000005	Emx-Cre+;DGF/-	Emx-DG-cKO
6	SO	P15	DM169	21.850434999999994	Emx-Cre+;DGF/-	Emx-DG-cKO
6	SO	P15	DM170	-9.939533000000003	Emx-Cre+;DGF/-	Emx-DG-cKO
6	SO	P15	DM171	28.557339333333335	Emx-Cre+;DGF/-	Emx-DG-cKO
6	SO	P15	DM172	16.423655999999994	Emx-Cre+;DGF/-	Emx-DG-cKO
6	SO	P15	DM173	19.57274	Emx-Cre+;DGF/-	Emx-DG-cKO
6	SO	P15	DM174	47.37233333333333	Emx-Cre+;DGF/-	Emx-DG-cKO
6	SO	P15	DM175	52.59014066666668	Emx-Cre+;DGF/-	Emx-DG-cKO
6	SO	P15	DM176	24.759659666666682	Emx-Cre+;DGF/-	Emx-DG-cKO
6	SO	P15	DM177	141.965057	Emx-Cre+;DGF/-	Emx-DG-cKO
6	SO	P15	DM178	-14.134175666666692	Emx-Cre+;DGF/-	Emx-DG-cKO
6	SO	P15	DM179	56.426382	Emx-Cre+;DGF/-	Emx-DG-cKO
6	SO	P15	DM180	35.46863566666665	Emx-Cre+;DGF/-	Emx-DG-cKO
6	SO	P15	DM181	-6.9477963333333435	Emx-Cre+;DGF/-	Emx-DG-cKO
6	SO	P15	DM182	70.72572133333333	Emx-Cre+;DGF/-	Emx-DG-cKO
6	SO	P15	DM183	28.827019333333322	Emx-Cre+;DGF/-	Emx-DG-cKO
6	SO	P15	DM184	55.046904333333316	Emx-Cre+;DGF/-	Emx-DG-cKO
6	SO	P15	DM185	-30.992372666666665	Emx-Cre+;DGF/-	Emx-DG-cKO
6	SO	P15	DM186	-12.355112666666665	Emx-Cre+;DGF/-	Emx-DG-cKO
6	SO	P15	DM187	29.513757	Emx-Cre+;DGF/-	Emx-DG-cKO
6	SO	P15	DM188	0.029488666666670344	Emx-Cre+;DGF/-	Emx-DG-cKO
6	SO	P15	DM189	-6.696260999999993	Emx-Cre+;DGF/-	Emx-DG-cKO
6	SO	P15	DM190	-24.89629566666667	Emx-Cre+;DGF/-	Emx-DG-cKO
6	SO	P15	DM191	-6.337825333333332	Emx-Cre+;DGF/-	Emx-DG-cKO
6	SO	P15	DM192	-7.723381999999996	Emx-Cre+;DGF/-	Emx-DG-cKO
6	SO	P15	DM193	18.481043	Emx-Cre+;DGF/-	Emx-DG-cKO
6	SO	P15	DM194	-12.166502666666664	Emx-Cre+;DGF/+	Emx-DG-Ctrl
6	SO	P15	DM195	-12.254322333333326	Emx-Cre+;DGF/+	Emx-DG-Ctrl
6	SO	P15	DM196	-8.069274666666663	Emx-Cre+;DGF/+	Emx-DG-Ctrl
6	SO	P15	DM197	-24.537306333333333	Emx-Cre+;DGF/+	Emx-DG-Ctrl
6	SO	P15	DM198	-26.638621999999998	Emx-Cre+;DGF/+	Emx-DG-Ctrl
6	SO	P15	DM199	-3.4184146666666684	Emx-Cre+;DGF/+	Emx-DG-Ctrl
6	SO	P15	DM200	-28.518264999999996	Emx-Cre+;DGF/+	Emx-DG-Ctrl
6	SO	P15	DM201	-30.73521766666667	Emx-Cre+;DGF/+	Emx-DG-Ctrl
6	SO	P15	DM202	-13.372193333333337	Emx-Cre+;DGF/+	Emx-DG-Ctrl
6	SO	P15	DM203	-7.0271566666666745	Emx-Cre+;DGF/+	Emx-DG-Ctrl
6	SO	P15	DM204	-34.43712800000001	Emx-Cre+;DGF/+	Emx-DG-Ctrl
6	SO	P15	DM205	-29.819661333333347	Emx-Cre+;DGF/+	Emx-DG-Ctrl
6	SO	P15	DM206	8.931577000000004	Emx-Cre+;DGF/+	Emx-DG-Ctrl
6	SO	P15	DM207	-41.471751666666655	Emx-Cre+;DGF/+	Emx-DG-Ctrl
6	SO	P15	DM208	-21.991567000000003	Emx-Cre+;DGF/+	Emx-DG-Ctrl
6	SO	P15	DM209	-15.260635666666673	Emx-Cre+;DGF/+	Emx-DG-Ctrl
6	SO	P15	DM210	-24.039892999999996	Emx-Cre+;DGF/+	Emx-DG-Ctrl
6	SO	P15	DM211	0.8515796666666802	Emx-Cre+;DGF/+	Emx-DG-Ctrl
6	SO	P15	DM212	-15.32210733333332	Emx-Cre+;DGF/+	Emx-DG-Ctrl
6	SO	P15	DM213	-42.572241333333345	Emx-Cre+;DGF/+	Emx-DG-Ctrl
6	SO	P15	DM214	-64.72527600000001	Emx-Cre+;DGF/+	Emx-DG-Ctrl
6	SO	P15	DM215	-50.71379666666666	Emx-Cre+;DGF/+	Emx-DG-Ctrl
6	SO	P15	DM216	-22.277374333333324	Emx-Cre+;DGF/+	Emx-DG-Ctrl
6	SO	P15	DM217	-22.031284666666664	Emx-Cre+;DGF/+	Emx-DG-Ctrl
6	SO	P15	DM218	-25.665758999999998	Emx-Cre+;DGF/+	Emx-DG-Ctrl
6	SO	P15	DM219	-9.910245000000003	Emx-Cre+;DGF/+	Emx-DG-Ctrl
6	SO	P15	DM220	-10.059452666666658	Emx-Cre+;DGF/+	Emx-DG-Ctrl
6	SO	P15	DM221	-11.834481666666667	Emx-Cre+;DGF/+	Emx-DG-Ctrl
6	SO	P15	DM222	-6.780742999999982	Emx-Cre+;DGF/+	Emx-DG-Ctrl
6	SO	P15	DM223	-30.631440666666673	Emx-Cre+;DGF/+	Emx-DG-Ctrl
6	SO	P15	DM224	-13.619629666666668	Emx-Cre+;DGF/+	Emx-DG-Ctrl
6	SO	P15	DM225	-21.143804333333332	Emx-Cre+;DGF/+	Emx-DG-Ctrl
6	SO	P15	DM226	-26.72543733333332	Emx-Cre+;DGF/+	Emx-DG-Ctrl
6	SO	P15	DM227	-28.007288	Emx-Cre+;DGF/+	Emx-DG-Ctrl
6	SO	P15	DM228	-75.483099	Emx-Cre+;DGF/+	Emx-DG-Ctrl
6	SO	P15	DM229	-35.872146333333326	Emx-Cre+;DGF/+	Emx-DG-Ctrl
6	SO	P15	DM230	-35.96270633333333	Emx-Cre+;DGF/+	Emx-DG-Ctrl
6	SO	P15	DM231	-29.069141666666667	Emx-Cre+;DGF/+	Emx-DG-Ctrl
6	SO	P15	DM232	-60.051209666666665	Emx-Cre+;DGF/+	Emx-DG-Ctrl
6	SO	P15	DM233	-18.532706333333334	Emx-Cre+;DGF/+	Emx-DG-Ctrl
6	SO	P15	DM234	-28.712854000000004	Emx-Cre+;DGF/+	Emx-DG-Ctrl
6	SO	P15	DM235	-16.33945666666665	Emx-Cre+;DGF/+	Emx-DG-Ctrl
6	SO	P15	DM236	-28.097624666666672	Emx-Cre+;DGF/+	Emx-DG-Ctrl
6	SO	P15	DM237	-25.81379666666666	Emx-Cre+;DGF/+	Emx-DG-Ctrl
6	SO	P15	DM238	-20.34197633333334	Emx-Cre+;DGF/+	Emx-DG-Ctrl
6	SO	P30	DM239	-77.49741766666666	Emx-Cre+;DGF/-	Emx-DG-cKO
6	SO	P30	DM240	50.73206433333335	Emx-Cre+;DGF/-	Emx-DG-cKO
6	SO	P30	DM241	-80.11399566666667	Emx-Cre+;DGF/-	Emx-DG-cKO
6	SO	P30	DM242	60.84694333333334	Emx-Cre+;DGF/-	Emx-DG-cKO
6	SO	P30	DM243	-36.67913266666667	Emx-Cre+;DGF/-	Emx-DG-cKO
6	SO	P30	DM244	74.70440866666668	Emx-Cre+;DGF/-	Emx-DG-cKO
6	SO	P30	DM245	27.058791333333335	Emx-Cre+;DGF/-	Emx-DG-cKO
6	SO	P30	DM246	-20.73341633333335	Emx-Cre+;DGF/-	Emx-DG-cKO
6	SO	P30	DM247	-8.17465599999999	Emx-Cre+;DGF/-	Emx-DG-cKO
6	SO	P30	DM248	-53.596478333333344	Emx-Cre+;DGF/-	Emx-DG-cKO
6	SO	P30	DM249	-20.635036333333307	Emx-Cre+;DGF/-	Emx-DG-cKO
6	SO	P30	DM250	183.2560463333334	Emx-Cre+;DGF/-	Emx-DG-cKO
6	SO	P30	DM251	64.10796066666664	Emx-Cre+;DGF/-	Emx-DG-cKO
6	SO	P30	DM252	-0.06895366666664889	Emx-Cre+;DGF/-	Emx-DG-cKO
6	SO	P30	DM253	26.619881666666686	Emx-Cre+;DGF/-	Emx-DG-cKO
6	SO	P30	DM254	111.51132896666667	Emx-Cre+;DGF/-	Emx-DG-cKO
6	SO	P30	DM255	-36.123422000000005	Emx-Cre+;DGF/-	Emx-DG-cKO
6	SO	P30	DM256	-31.00734266666664	Emx-Cre+;DGF/-	Emx-DG-cKO
6	SO	P30	DM257	13.391426666666689	Emx-Cre+;DGF/-	Emx-DG-cKO
6	SO	P30	DM258	44.496333000000014	Emx-Cre+;DGF/-	Emx-DG-cKO
6	SO	P30	DM259	76.13861299999998	Emx-Cre+;DGF/-	Emx-DG-cKO
6	SO	P30	DM260	52.598118	Emx-Cre+;DGF/-	Emx-DG-cKO
6	SO	P30	DM261	152.22710133333334	Emx-Cre+;DGF/-	Emx-DG-cKO
6	SO	P30	DM262	64.66754833333336	Emx-Cre+;DGF/-	Emx-DG-cKO
6	SO	P30	DM263	83.91702833333333	Emx-Cre+;DGF/-	Emx-DG-cKO
6	SO	P30	DM264	40.88375900000002	Emx-Cre+;DGF/-	Emx-DG-cKO
6	SO	P30	DM265	30.90859599999999	Emx-Cre+;DGF/-	Emx-DG-cKO
6	SO	P30	DM266	155.34337166666666	Emx-Cre+;DGF/-	Emx-DG-cKO
6	SO	P30	DM267	35.39871866666666	Emx-Cre+;DGF/-	Emx-DG-cKO
6	SO	P30	DM268	170.97948233333332	Emx-Cre+;DGF/-	Emx-DG-cKO
6	SO	P30	DM269	67.78402866666666	Emx-Cre+;DGF/-	Emx-DG-cKO
6	SO	P30	DM270	63.18241199999998	Emx-Cre+;DGF/-	Emx-DG-cKO
6	SO	P30	DM271	42.417228333333334	Emx-Cre+;DGF/-	Emx-DG-cKO
6	SO	P30	DM272	270.5495836666667	Emx-Cre+;DGF/-	Emx-DG-cKO
6	SO	P30	DM273	379.7816016666667	Emx-Cre+;DGF/-	Emx-DG-cKO
6	SO	P30	DM274	-13.515131666666681	Emx-Cre+;DGF/-	Emx-DG-cKO
6	SO	P30	DM275	24.036067333333335	Emx-Cre+;DGF/-	Emx-DG-cKO
6	SO	P30	DM276	162.85668166666662	Emx-Cre+;DGF/-	Emx-DG-cKO
6	SO	P30	DM277	-56.18077033333335	Emx-Cre+;DGF/-	Emx-DG-cKO
6	SO	P30	DM278	-51.60515233333333	Emx-Cre+;DGF/+	Emx-DG-Ctrl
6	SO	P30	DM279	-31.410994000000017	Emx-Cre+;DGF/+	Emx-DG-Ctrl
6	SO	P30	DM280	-72.95179300000001	Emx-Cre+;DGF/+	Emx-DG-Ctrl
6	SO	P30	DM281	-35.176352999999985	Emx-Cre+;DGF/+	Emx-DG-Ctrl
6	SO	P30	DM282	1.6955056666666526	Emx-Cre+;DGF/+	Emx-DG-Ctrl
6	SO	P30	DM283	-55.219232	Emx-Cre+;DGF/+	Emx-DG-Ctrl
6	SO	P30	DM284	-78.71934966666666	Emx-Cre+;DGF/+	Emx-DG-Ctrl
6	SO	P30	DM285	-49.70722533333335	Emx-Cre+;DGF/+	Emx-DG-Ctrl
6	SO	P30	DM286	-39.11141700000001	Emx-Cre+;DGF/+	Emx-DG-Ctrl
6	SO	P30	DM287	-37.09216533333332	Emx-Cre+;DGF/+	Emx-DG-Ctrl
6	SO	P30	DM288	-39.34593066666665	Emx-Cre+;DGF/+	Emx-DG-Ctrl
6	SO	P30	DM289	-50.37925700000002	Emx-Cre+;DGF/+	Emx-DG-Ctrl
6	SO	P30	DM290	49.62191633333337	Emx-Cre+;DGF/+	Emx-DG-Ctrl
6	SO	P30	DM291	-25.779046333333344	Emx-Cre+;DGF/+	Emx-DG-Ctrl
6	SO	P30	DM292	-31.44160366666667	Emx-Cre+;DGF/+	Emx-DG-Ctrl
6	SO	P30	DM293	-47.03988333333336	Emx-Cre+;DGF/+	Emx-DG-Ctrl
6	SO	P30	DM294	-10.115083333333322	Emx-Cre+;DGF/+	Emx-DG-Ctrl
6	SO	P30	DM295	-40.576728	Emx-Cre+;DGF/+	Emx-DG-Ctrl
6	SO	P30	DM296	-68.665232	Emx-Cre+;DGF/+	Emx-DG-Ctrl
6	SO	P30	DM297	-54.70983600000002	Emx-Cre+;DGF/+	Emx-DG-Ctrl
6	SO	P30	DM298	-42.61097966666667	Emx-Cre+;DGF/+	Emx-DG-Ctrl
6	SO	P30	DM299	-24.958430000000003	Emx-Cre+;DGF/+	Emx-DG-Ctrl
6	SO	P30	DM300	-55.01537166666666	Emx-Cre+;DGF/+	Emx-DG-Ctrl
6	SO	P30	DM301	-28.760805000000023	Emx-Cre+;DGF/+	Emx-DG-Ctrl
6	SO	P30	DM302	-35.13584366666665	Emx-Cre+;DGF/+	Emx-DG-Ctrl
6	SO	P30	DM303	-76.01200966666667	Emx-Cre+;DGF/+	Emx-DG-Ctrl
6	SO	P30	DM304	-54.05430266666669	Emx-Cre+;DGF/+	Emx-DG-Ctrl
6	SO	P30	DM305	-26.995521000000014	Emx-Cre+;DGF/+	Emx-DG-Ctrl
6	SO	P30	DM306	-17.764073333333318	Emx-Cre+;DGF/+	Emx-DG-Ctrl
6	SO	P30	DM307	-41.869592666666655	Emx-Cre+;DGF/+	Emx-DG-Ctrl
6	SO	P30	DM308	-33.63994899999998	Emx-Cre+;DGF/+	Emx-DG-Ctrl
6	SO	P30	DM309	-86.939081	Emx-Cre+;DGF/+	Emx-DG-Ctrl
6	SO	P30	DM310	-92.09555433333333	Emx-Cre+;DGF/+	Emx-DG-Ctrl
6	SO	P30	DM311	-57.93340066666667	Emx-Cre+;DGF/+	Emx-DG-Ctrl
6	SO	P30	DM312	-57.098661	Emx-Cre+;DGF/+	Emx-DG-Ctrl
6	SO	P30	DM313	-66.14748266666665	Emx-Cre+;DGF/+	Emx-DG-Ctrl
6	SO	P30	DM314	-77.73430933333334	Emx-Cre+;DGF/+	Emx-DG-Ctrl
6	SO	P30	DM315	-79.13753400000002	Emx-Cre+;DGF/+	Emx-DG-Ctrl
6	SO	P30	DM316	-33.12198800000002	Emx-Cre+;DGF/+	Emx-DG-Ctrl
6	SO	P30	DM317	-60.66989366666667	Emx-Cre+;DGF/+	Emx-DG-Ctrl
6	SO	P30	DM318	-5.575395333333347	Emx-Cre+;DGF/+	Emx-DG-Ctrl
6	SO	P30	DM319	-51.59360266666664	Emx-Cre+;DGF/+	Emx-DG-Ctrl
6	SO	P30	DM320	-45.52034933333334	Emx-Cre+;DGF/+	Emx-DG-Ctrl
6	SO	P30	DM321	-71.112977	Emx-Cre+;DGF/+	Emx-DG-Ctrl
7	SO	P5	DM001	77.24656	Emx-Cre+;DGF/-	Emx-DG-cKO
7	SO	P5	DM002	91.72085533333335	Emx-Cre+;DGF/-	Emx-DG-cKO
7	SO	P5	DM003	63.14129466666667	Emx-Cre+;DGF/-	Emx-DG-cKO
7	SO	P5	DM004	45.3828148	Emx-Cre+;DGF/-	Emx-DG-cKO
7	SO	P5	DM005	79.73485866666667	Emx-Cre+;DGF/-	Emx-DG-cKO
7	SO	P5	DM006	16.420189333333337	Emx-Cre+;DGF/-	Emx-DG-cKO
7	SO	P5	DM007	46.563383699999996	Emx-Cre+;DGF/-	Emx-DG-cKO
7	SO	P5	DM008	48.830542	Emx-Cre+;DGF/-	Emx-DG-cKO
7	SO	P5	DM009	29.419068666666664	Emx-Cre+;DGF/-	Emx-DG-cKO
7	SO	P5	DM010	36.05638966666667	Emx-Cre+;DGF/-	Emx-DG-cKO
7	SO	P5	DM011	14.264769233333348	Emx-Cre+;DGF/-	Emx-DG-cKO
7	SO	P5	DM012	42.90615600000001	Emx-Cre+;DGF/-	Emx-DG-cKO
7	SO	P5	DM013	68.276045	Emx-Cre+;DGF/-	Emx-DG-cKO
7	SO	P5	DM014	124.099261	Emx-Cre+;DGF/-	Emx-DG-cKO
7	SO	P5	DM015	129.668574	Emx-Cre+;DGF/-	Emx-DG-cKO
7	SO	P5	DM016	72.26538466666668	Emx-Cre+;DGF/-	Emx-DG-cKO
7	SO	P5	DM017	116.48244233333334	Emx-Cre+;DGF/-	Emx-DG-cKO
7	SO	P5	DM018	101.09717866666666	Emx-Cre+;DGF/-	Emx-DG-cKO
7	SO	P5	DM019	120.54901833333334	Emx-Cre+;DGF/-	Emx-DG-cKO
7	SO	P5	DM020	61.96844400000001	Emx-Cre+;DGF/-	Emx-DG-cKO
7	SO	P5	DM021	64.62551866666666	Emx-Cre+;DGF/-	Emx-DG-cKO
7	SO	P5	DM022	66.62262966666667	Emx-Cre+;DGF/-	Emx-DG-cKO
7	SO	P5	DM023	91.82114400000002	Emx-Cre+;DGF/-	Emx-DG-cKO
7	SO	P5	DM024	27.865418000000005	Emx-Cre+;DGF/-	Emx-DG-cKO
7	SO	P5	DM025	95.25691400000001	Emx-Cre+;DGF/-	Emx-DG-cKO
7	SO	P5	DM026	175.52328866666664	Emx-Cre+;DGF/-	Emx-DG-cKO
7	SO	P5	DM027	150.42106766666666	Emx-Cre+;DGF/-	Emx-DG-cKO
7	SO	P5	DM028	168.08307566666667	Emx-Cre+;DGF/-	Emx-DG-cKO
7	SO	P5	DM029	114.78476566666667	Emx-Cre+;DGF/-	Emx-DG-cKO
7	SO	P5	DM030	37.87894299999999	Emx-Cre+;DGF/-	Emx-DG-cKO
7	SO	P5	DM031	162.8934853333333	Emx-Cre+;DGF/-	Emx-DG-cKO
7	SO	P5	DM032	18.1540195	Emx-Cre+;DGF/-	Emx-DG-cKO
7	SO	P5	DM033	161.32003666666668	Emx-Cre+;DGF/-	Emx-DG-cKO
7	SO	P5	DM034	167.38020466666666	Emx-Cre+;DGF/-	Emx-DG-cKO
7	SO	P5	DM035	179.974174	Emx-Cre+;DGF/-	Emx-DG-cKO
7	SO	P5	DM036	74.40110800000001	Emx-Cre+;DGF/-	Emx-DG-cKO
7	SO	P5	DM037	169.47750233333332	Emx-Cre+;DGF/-	Emx-DG-cKO
7	SO	P5	DM038	137.68754	Emx-Cre+;DGF/-	Emx-DG-cKO
7	SO	P5	DM039	117.32693699999997	Emx-Cre+;DGF/-	Emx-DG-cKO
7	SO	P5	DM040	72.78508466666666	Emx-Cre+;DGF/-	Emx-DG-cKO
7	SO	P5	DM041	47.38237633333333	Emx-Cre+;DGF/-	Emx-DG-cKO
7	SO	P5	DM042	28.303479666666664	Emx-Cre+;DGF/-	Emx-DG-cKO
7	SO	P5	DM043	22.431423999999982	Emx-Cre+;DGF/-	Emx-DG-cKO
7	SO	P5	DM044	-14.486450666666675	Emx-Cre+;DGF/+	Emx-DG-Ctrl
7	SO	P5	DM045	3.0113880000000015	Emx-Cre+;DGF/+	Emx-DG-Ctrl
7	SO	P5	DM046	45.717177	Emx-Cre+;DGF/+	Emx-DG-Ctrl
7	SO	P5	DM047	34.709270000000004	Emx-Cre+;DGF/+	Emx-DG-Ctrl
7	SO	P5	DM048	29.113207666666664	Emx-Cre+;DGF/+	Emx-DG-Ctrl
7	SO	P5	DM049	5.820598666666683	Emx-Cre+;DGF/+	Emx-DG-Ctrl
7	SO	P5	DM050	1.2866653333333413	Emx-Cre+;DGF/+	Emx-DG-Ctrl
7	SO	P5	DM051	-6.75372866666666	Emx-Cre+;DGF/+	Emx-DG-Ctrl
7	SO	P5	DM052	41.359349333333334	Emx-Cre+;DGF/+	Emx-DG-Ctrl
7	SO	P5	DM053	43.887312333333334	Emx-Cre+;DGF/+	Emx-DG-Ctrl
7	SO	P5	DM054	12.543245666666678	Emx-Cre+;DGF/+	Emx-DG-Ctrl
7	SO	P5	DM055	52.39763733333333	Emx-Cre+;DGF/+	Emx-DG-Ctrl
7	SO	P5	DM056	29.72561166666667	Emx-Cre+;DGF/+	Emx-DG-Ctrl
7	SO	P5	DM057	69.2246343333333	Emx-Cre+;DGF/+	Emx-DG-Ctrl
7	SO	P5	DM058	24.097269	Emx-Cre+;DGF/+	Emx-DG-Ctrl
7	SO	P5	DM059	94.97699766666666	Emx-Cre+;DGF/+	Emx-DG-Ctrl
7	SO	P5	DM060	54.37616499999999	Emx-Cre+;DGF/+	Emx-DG-Ctrl
7	SO	P5	DM061	67.99482333333333	Emx-Cre+;DGF/+	Emx-DG-Ctrl
7	SO	P5	DM062	28.359520000000003	Emx-Cre+;DGF/+	Emx-DG-Ctrl
7	SO	P5	DM063	9.05722466666667	Emx-Cre+;DGF/+	Emx-DG-Ctrl
7	SO	P5	DM064	11.432472999999996	Emx-Cre+;DGF/+	Emx-DG-Ctrl
7	SO	P5	DM065	31.129338666666655	Emx-Cre+;DGF/+	Emx-DG-Ctrl
7	SO	P5	DM066	29.788764000000004	Emx-Cre+;DGF/+	Emx-DG-Ctrl
7	SO	P5	DM067	67.195756	Emx-Cre+;DGF/+	Emx-DG-Ctrl
7	SO	P5	DM068	68.57118333333332	Emx-Cre+;DGF/+	Emx-DG-Ctrl
7	SO	P5	DM069	73.552701	Emx-Cre+;DGF/+	Emx-DG-Ctrl
7	SO	P5	DM070	28.004036999999993	Emx-Cre+;DGF/+	Emx-DG-Ctrl
7	SO	P5	DM071	20.01782933333334	Emx-Cre+;DGF/+	Emx-DG-Ctrl
7	SO	P5	DM072	22.56947600000001	Emx-Cre+;DGF/+	Emx-DG-Ctrl
7	SO	P5	DM073	1.4794250000000015	Emx-Cre+;DGF/+	Emx-DG-Ctrl
[truncated: 158,501 more rows]
