# Supplementary material for: Inhibitory CCK+ basket synapse defects in mouse models of dystroglycanopathy
Source: eLife. 2024 Jan 5;12:RP87965. doi: 10.7554/eLife.87965 (PMC10942650; doi:10.7554/eLife.87965)
Supplement: Figure 5—figure supplement 2—source data 2. [file elife-87965-fig5-figsupp2-data2.csv]

Image	Markers	Region	Condition	PctColoc	Experiment
JJ109	pv-vgat	all	Emx-DG-cKO	59.9510603588907	Emx-DG
JJ109	pv-vgat	sp	Emx-DG-cKO	64.30961409770244	Emx-DG
JJ109	pv-vgat	so	Emx-DG-cKO	54.56072971675468	Emx-DG
JJ109	pv-vgat	sr	Emx-DG-cKO	59.91116046640755	Emx-DG
JJ110	pv-vgat	all	Emx-DG-cKO	69.37104171216423	Emx-DG
JJ110	pv-vgat	sp	Emx-DG-cKO	76.63702506063056	Emx-DG
JJ110	pv-vgat	so	Emx-DG-cKO	60.094530722484805	Emx-DG
JJ110	pv-vgat	sr	Emx-DG-cKO	68.69215291750503	Emx-DG
JJ118	pv-vgat	all	Emx-DG-Ctrl	59.21431139877742	Emx-DG
JJ118	pv-vgat	sp	Emx-DG-Ctrl	66.09141791044776	Emx-DG
JJ118	pv-vgat	so	Emx-DG-Ctrl	48.52468594799883	Emx-DG
JJ118	pv-vgat	sr	Emx-DG-Ctrl	60.65045414591269	Emx-DG
JJ119	pv-vgat	all	Emx-DG-Ctrl	57.47031206848937	Emx-DG
JJ119	pv-vgat	sp	Emx-DG-Ctrl	65.10557661072009	Emx-DG
JJ119	pv-vgat	so	Emx-DG-Ctrl	40.44736842105263	Emx-DG
JJ119	pv-vgat	sr	Emx-DG-Ctrl	67.51781472684085	Emx-DG
JJ120	pv-vgat	all	Emx-DG-Ctrl	60.37032103370188	Emx-DG
JJ120	pv-vgat	sp	Emx-DG-Ctrl	65.92446448703495	Emx-DG
JJ120	pv-vgat	so	Emx-DG-Ctrl	50.16916384726921	Emx-DG
JJ120	pv-vgat	sr	Emx-DG-Ctrl	60.1380042462845	Emx-DG
JJ125	pv-vgat	all	Emx-DG-cKO	66.79793717768402	Emx-DG
JJ125	pv-vgat	sp	Emx-DG-cKO	69.09510812513122	Emx-DG
JJ125	pv-vgat	so	Emx-DG-cKO	63.53029732781332	Emx-DG
JJ125	pv-vgat	sr	Emx-DG-cKO	65.42372881355932	Emx-DG
JJ126	pv-vgat	all	Emx-DG-cKO	73.0301028592998	Emx-DG
JJ126	pv-vgat	sp	Emx-DG-cKO	73.49263063867798	Emx-DG
JJ126	pv-vgat	so	Emx-DG-cKO	74.42807897210906	Emx-DG
JJ126	pv-vgat	sr	Emx-DG-cKO	69.91120218579235	Emx-DG
JJ127	pv-vgat	all	Emx-DG-cKO	72.23244806731527	Emx-DG
JJ127	pv-vgat	sp	Emx-DG-cKO	73.65566037735849	Emx-DG
JJ127	pv-vgat	so	Emx-DG-cKO	66.32231404958678	Emx-DG
JJ127	pv-vgat	sr	Emx-DG-cKO	75.29754033324517	Emx-DG
JJ128	pv-vgat	all	Emx-DG-cKO	69.99900626055849	Emx-DG
JJ128	pv-vgat	sp	Emx-DG-cKO	71.17708880714662	Emx-DG
JJ128	pv-vgat	so	Emx-DG-cKO	66.75023503603886	Emx-DG
JJ128	pv-vgat	sr	Emx-DG-cKO	71.46118721461187	Emx-DG
JJ161	pv-vgat	all	Emx-DG-cKO	63.69673904932468	Emx-DG
JJ161	pv-vgat	sp	Emx-DG-cKO	67.19970249163258	Emx-DG
JJ161	pv-vgat	so	Emx-DG-cKO	61.979166666666664	Emx-DG
JJ161	pv-vgat	sr	Emx-DG-cKO	59.810376613115615	Emx-DG
JJ162	pv-vgat	all	Emx-DG-cKO	59.21180064069135	Emx-DG
JJ162	pv-vgat	sp	Emx-DG-cKO	63.716814159292035	Emx-DG
JJ162	pv-vgat	so	Emx-DG-cKO	60.18782014797951	Emx-DG
JJ162	pv-vgat	sr	Emx-DG-cKO	51.202578725514506	Emx-DG
JJ163	pv-vgat	all	Emx-DG-cKO	60.123129675810475	Emx-DG
JJ163	pv-vgat	sp	Emx-DG-cKO	66.7853170189099	Emx-DG
JJ163	pv-vgat	so	Emx-DG-cKO	55.531660692951014	Emx-DG
JJ163	pv-vgat	sr	Emx-DG-cKO	56.98458574181117	Emx-DG
JJ164	pv-vgat	all	Emx-DG-cKO	52.76100400145508	Emx-DG
JJ164	pv-vgat	sp	Emx-DG-cKO	60.0084015963033	Emx-DG
JJ164	pv-vgat	so	Emx-DG-cKO	48.069872762562	Emx-DG
JJ164	pv-vgat	sr	Emx-DG-cKO	49.20634920634921	Emx-DG
JJ165	pv-vgat	all	Emx-DG-Ctrl	52.00263939293962	Emx-DG
JJ165	pv-vgat	sp	Emx-DG-Ctrl	57.27648857708221	Emx-DG
JJ165	pv-vgat	so	Emx-DG-Ctrl	50.39336593663619	Emx-DG
JJ165	pv-vgat	sr	Emx-DG-Ctrl	46.96505211526671	Emx-DG
JJ166	pv-vgat	all	Emx-DG-Ctrl	66.5660552588809	Emx-DG
JJ166	pv-vgat	sp	Emx-DG-Ctrl	67.1515628071555	Emx-DG
JJ166	pv-vgat	so	Emx-DG-Ctrl	66.99470098410295	Emx-DG
JJ166	pv-vgat	sr	Emx-DG-Ctrl	64.7377938517179	Emx-DG
JJ167	pv-vgat	all	Emx-DG-Ctrl	61.297416162726776	Emx-DG
JJ167	pv-vgat	sp	Emx-DG-Ctrl	67.3801768264309	Emx-DG
JJ167	pv-vgat	so	Emx-DG-Ctrl	55.45505935556812	Emx-DG
JJ167	pv-vgat	sr	Emx-DG-Ctrl	58.86939571150098	Emx-DG
JJ168	pv-vgat	all	Emx-DG-Ctrl	51.79044590809297	Emx-DG
JJ168	pv-vgat	sp	Emx-DG-Ctrl	58.89437314906219	Emx-DG
JJ168	pv-vgat	so	Emx-DG-Ctrl	44.43147326640206	Emx-DG
JJ168	pv-vgat	sr	Emx-DG-Ctrl	49.765868886576484	Emx-DG
JJ169	pv-vgat	all	Emx-DG-Ctrl	58.1686510371916	Emx-DG
JJ169	pv-vgat	sp	Emx-DG-Ctrl	62.250123905501404	Emx-DG
JJ169	pv-vgat	so	Emx-DG-Ctrl	57.99837596427121	Emx-DG
JJ169	pv-vgat	sr	Emx-DG-Ctrl	53.019755409219194	Emx-DG
JJ170	pv-vgat	all	Emx-DG-Ctrl	51.843343792021514	Emx-DG
JJ170	pv-vgat	sp	Emx-DG-Ctrl	55.689877498388135	Emx-DG
JJ170	pv-vgat	so	Emx-DG-Ctrl	50.56894889103182	Emx-DG
JJ170	pv-vgat	sr	Emx-DG-Ctrl	48.58337203901533	Emx-DG
JJ171	pv-vgat	all	Emx-DG-Ctrl	49.78588421887391	Emx-DG
JJ171	pv-vgat	sp	Emx-DG-Ctrl	56.604180133591896	Emx-DG
JJ171	pv-vgat	so	Emx-DG-Ctrl	41.20126448893572	Emx-DG
JJ171	pv-vgat	sr	Emx-DG-Ctrl	49.4608195542775	Emx-DG
JJ172	pv-vgat	all	Emx-DG-Ctrl	56.69314079422383	Emx-DG
JJ172	pv-vgat	sp	Emx-DG-Ctrl	62.69795840488457	Emx-DG
JJ172	pv-vgat	so	Emx-DG-Ctrl	51.33522727272727	Emx-DG
JJ172	pv-vgat	sr	Emx-DG-Ctrl	53.782668500687755	Emx-DG
JJ173	pv-vgat	all	Emx-DG-cKO	55.745517815265906	Emx-DG
JJ173	pv-vgat	sp	Emx-DG-cKO	60.01179013558656	Emx-DG
JJ173	pv-vgat	so	Emx-DG-cKO	53.836602930221005	Emx-DG
JJ173	pv-vgat	sr	Emx-DG-cKO	51.718254935413114	Emx-DG
JJ174	pv-vgat	all	Emx-DG-cKO	55.01634830493891	Emx-DG
JJ174	pv-vgat	sp	Emx-DG-cKO	60.891445003594534	Emx-DG
JJ174	pv-vgat	so	Emx-DG-cKO	50.73012439156301	Emx-DG
JJ174	pv-vgat	sr	Emx-DG-cKO	52.30605171954146	Emx-DG
JJ175	pv-vgat	all	Emx-DG-Ctrl	62.36891556040492	Emx-DG
JJ175	pv-vgat	sp	Emx-DG-Ctrl	63.39969372128637	Emx-DG
JJ175	pv-vgat	so	Emx-DG-Ctrl	60.69458631256384	Emx-DG
JJ175	pv-vgat	sr	Emx-DG-Ctrl	62.04652996845426	Emx-DG
JJ176	pv-vgat	all	Emx-DG-Ctrl	57.3612276705431	Emx-DG
JJ176	pv-vgat	sp	Emx-DG-Ctrl	62.93117676184189	Emx-DG
JJ176	pv-vgat	so	Emx-DG-Ctrl	54.608341810783315	Emx-DG
JJ176	pv-vgat	sr	Emx-DG-Ctrl	53.05289314873979	Emx-DG
JJ177	pv-vgat	all	Emx-DG-Ctrl	55.22898685949771	Emx-DG
JJ177	pv-vgat	sp	Emx-DG-Ctrl	62.18617226728467	Emx-DG
JJ177	pv-vgat	so	Emx-DG-Ctrl	47.30475940047331	Emx-DG
JJ177	pv-vgat	sr	Emx-DG-Ctrl	52.98969072164948	Emx-DG
JJ178	pv-vgat	all	Emx-DG-Ctrl	55.92244332677309	Emx-DG
JJ178	pv-vgat	sp	Emx-DG-Ctrl	61.17460875681378	Emx-DG
JJ178	pv-vgat	so	Emx-DG-Ctrl	49.4393741851369	Emx-DG
JJ178	pv-vgat	sr	Emx-DG-Ctrl	54.146806482364155	Emx-DG
JJ179	pv-vgat	all	Emx-DG-Ctrl	58.36069714574388	Emx-DG
JJ179	pv-vgat	sp	Emx-DG-Ctrl	57.91061663209504	Emx-DG
JJ179	pv-vgat	so	Emx-DG-Ctrl	56.6410981025434	Emx-DG
JJ179	pv-vgat	sr	Emx-DG-Ctrl	59.77773794586844	Emx-DG
JJ180	pv-vgat	all	Emx-DG-Ctrl	58.44793078959261	Emx-DG
JJ180	pv-vgat	sp	Emx-DG-Ctrl	59.855985598559855	Emx-DG
JJ180	pv-vgat	so	Emx-DG-Ctrl	54.82020736818884	Emx-DG
JJ180	pv-vgat	sr	Emx-DG-Ctrl	59.451953341973706	Emx-DG
JJ181	pv-vgat	all	Emx-DG-Ctrl	57.75089948710097	Emx-DG
JJ181	pv-vgat	sp	Emx-DG-Ctrl	61.24740124740125	Emx-DG
JJ181	pv-vgat	so	Emx-DG-Ctrl	50.67158282854886	Emx-DG
JJ181	pv-vgat	sr	Emx-DG-Ctrl	59.49224893282408	Emx-DG
JJ182	pv-vgat	all	Emx-DG-Ctrl	61.71775223499361	Emx-DG
JJ182	pv-vgat	sp	Emx-DG-Ctrl	63.60582306830907	Emx-DG
JJ182	pv-vgat	so	Emx-DG-Ctrl	59.49490043710539	Emx-DG
JJ182	pv-vgat	sr	Emx-DG-Ctrl	61.166032953105194	Emx-DG
JJ342	pv-vgat	all	Emx-DG-cKO	60.72019464720194	Emx-DG
JJ342	pv-vgat	sp	Emx-DG-cKO	59.346163986290534	Emx-DG
JJ342	pv-vgat	so	Emx-DG-cKO	55.349500713266764	Emx-DG
JJ342	pv-vgat	sr	Emx-DG-cKO	65.56796513211658	Emx-DG
JJ343	pv-vgat	all	Emx-DG-cKO	67.37549581313354	Emx-DG
JJ343	pv-vgat	sp	Emx-DG-cKO	69.82905982905983	Emx-DG
JJ343	pv-vgat	so	Emx-DG-cKO	61.5689381933439	Emx-DG
JJ343	pv-vgat	sr	Emx-DG-cKO	68.60618014464168	Emx-DG
JJ344	pv-vgat	all	Emx-DG-cKO	60.91028093847548	Emx-DG
JJ344	pv-vgat	sp	Emx-DG-cKO	64.72945891783567	Emx-DG
JJ344	pv-vgat	so	Emx-DG-cKO	56.083535108958834	Emx-DG
JJ344	pv-vgat	sr	Emx-DG-cKO	60.816847479259735	Emx-DG
JJ349	pv-vgat	all	Emx-DG-cKO	65.989367985823975	Emx-DG
JJ349	pv-vgat	sp	Emx-DG-cKO	68.67364746945898	Emx-DG
JJ349	pv-vgat	so	Emx-DG-cKO	60.47120418848168	Emx-DG
JJ349	pv-vgat	sr	Emx-DG-cKO	66.87385740402193	Emx-DG
JJ350	pv-vgat	all	Emx-DG-cKO	65.32081377151799	Emx-DG
JJ350	pv-vgat	sp	Emx-DG-cKO	69.17735042735043	Emx-DG
JJ350	pv-vgat	so	Emx-DG-cKO	61.69977924944812	Emx-DG
JJ350	pv-vgat	sr	Emx-DG-cKO	63.2272581163613	Emx-DG
JJ351	pv-vgat	all	Emx-DG-cKO	63.69825708061002	Emx-DG
JJ351	pv-vgat	sp	Emx-DG-cKO	66.8295861844249	Emx-DG
JJ351	pv-vgat	so	Emx-DG-cKO	58.3451536643026	Emx-DG
JJ351	pv-vgat	sr	Emx-DG-cKO	63.888888888888886	Emx-DG
JJ352	pv-vgat	all	Emx-DG-cKO	62.84294907982387	Emx-DG
JJ352	pv-vgat	sp	Emx-DG-cKO	62.924199175388516	Emx-DG
JJ352	pv-vgat	so	Emx-DG-cKO	57.45441544511977	Emx-DG
JJ352	pv-vgat	sr	Emx-DG-cKO	67.39055498104102	Emx-DG
JJ357	pv-vgat	all	Emx-DG-Ctrl	60.84084084084084	Emx-DG
JJ357	pv-vgat	sp	Emx-DG-Ctrl	61.42423219709754	Emx-DG
JJ357	pv-vgat	so	Emx-DG-Ctrl	57.592800899887514	Emx-DG
JJ357	pv-vgat	sr	Emx-DG-Ctrl	62.58401792382375	Emx-DG
JJ358	pv-vgat	all	Emx-DG-Ctrl	57.19660194174757	Emx-DG
JJ358	pv-vgat	sp	Emx-DG-Ctrl	59.35587761674718	Emx-DG
JJ358	pv-vgat	so	Emx-DG-Ctrl	51.4867617107943	Emx-DG
JJ358	pv-vgat	sr	Emx-DG-Ctrl	59.365671641791046	Emx-DG
JJ359	pv-vgat	all	Emx-DG-Ctrl	62.956306862855214	Emx-DG
JJ359	pv-vgat	sp	Emx-DG-Ctrl	59.26599939338793	Emx-DG
JJ359	pv-vgat	so	Emx-DG-Ctrl	62.24066390041494	Emx-DG
JJ359	pv-vgat	sr	Emx-DG-Ctrl	66.56514382402707	Emx-DG
JJ360	pv-vgat	all	Emx-DG-Ctrl	65.73883577393198	Emx-DG
JJ360	pv-vgat	sp	Emx-DG-Ctrl	63.13609467455621	Emx-DG
JJ360	pv-vgat	so	Emx-DG-Ctrl	64.43677168752697	Emx-DG
JJ360	pv-vgat	sr	Emx-DG-Ctrl	69.71473231731144	Emx-DG
JJ366	pv-vgat	all	Emx-DG-cKO	52.829910944284975	Emx-DG
JJ366	pv-vgat	sp	Emx-DG-cKO	55.24201450127376	Emx-DG
JJ366	pv-vgat	so	Emx-DG-cKO	49.8365345320801	Emx-DG
JJ366	pv-vgat	sr	Emx-DG-cKO	52.53481894150418	Emx-DG
JJ367	pv-vgat	all	Emx-DG-cKO	50.788381742738586	Emx-DG
JJ367	pv-vgat	sp	Emx-DG-cKO	52.98445076074235	Emx-DG
JJ367	pv-vgat	so	Emx-DG-cKO	46.958410924891375	Emx-DG
JJ367	pv-vgat	sr	Emx-DG-cKO	49.70144011239902	Emx-DG
JJ368	pv-vgat	all	Emx-DG-cKO	52.43960966245401	Emx-DG
JJ368	pv-vgat	sp	Emx-DG-cKO	55.38527032779906	Emx-DG
JJ368	pv-vgat	so	Emx-DG-cKO	47.05097411262343	Emx-DG
JJ368	pv-vgat	sr	Emx-DG-cKO	53.38920384520582	Emx-DG
JJ373	pv-vgat	all	Emx-DG-Ctrl	56.29592350276799	Emx-DG
JJ373	pv-vgat	sp	Emx-DG-Ctrl	54.78695423461336	Emx-DG
JJ373	pv-vgat	so	Emx-DG-Ctrl	54.4975404075896	Emx-DG
JJ373	pv-vgat	sr	Emx-DG-Ctrl	58.8378460602373	Emx-DG
JJ374	pv-vgat	all	Emx-DG-Ctrl	50.077200205867214	Emx-DG
JJ374	pv-vgat	sp	Emx-DG-Ctrl	52.82176207876573	Emx-DG
JJ374	pv-vgat	so	Emx-DG-Ctrl	46.03051461080941	Emx-DG
JJ374	pv-vgat	sr	Emx-DG-Ctrl	50.05235602094241	Emx-DG
JJ376	pv-vgat	all	Emx-DG-Ctrl	49.35353535353536	Emx-DG
JJ376	pv-vgat	sp	Emx-DG-Ctrl	52.97660412323373	Emx-DG
JJ376	pv-vgat	so	Emx-DG-Ctrl	46.696866742166854	Emx-DG
JJ376	pv-vgat	sr	Emx-DG-Ctrl	45.39877300613497	Emx-DG
JJ381	pv-vgat	all	Emx-DG-Ctrl	58.84304833536113	Emx-DG
JJ381	pv-vgat	sp	Emx-DG-Ctrl	56.58132919575899	Emx-DG
JJ381	pv-vgat	so	Emx-DG-Ctrl	59.62014863748968	Emx-DG
JJ381	pv-vgat	sr	Emx-DG-Ctrl	60.53779069767442	Emx-DG
JJ382	pv-vgat	all	Emx-DG-Ctrl	56.96892834495878	Emx-DG
JJ382	pv-vgat	sp	Emx-DG-Ctrl	58.94699395233013	Emx-DG
JJ382	pv-vgat	so	Emx-DG-Ctrl	53.2221379833207	Emx-DG
JJ382	pv-vgat	sr	Emx-DG-Ctrl	58.065843621399175	Emx-DG
JJ383	pv-vgat	all	Emx-DG-Ctrl	58.26880530973451	Emx-DG
JJ383	pv-vgat	sp	Emx-DG-Ctrl	59.125475285171106	Emx-DG
JJ383	pv-vgat	so	Emx-DG-Ctrl	54.929577464788736	Emx-DG
JJ383	pv-vgat	sr	Emx-DG-Ctrl	59.219380888290715	Emx-DG
JJ384	pv-vgat	all	Emx-DG-Ctrl	56.5437143778901	Emx-DG
JJ384	pv-vgat	sp	Emx-DG-Ctrl	58.66253550219468	Emx-DG
JJ384	pv-vgat	so	Emx-DG-Ctrl	52.35582359592914	Emx-DG
JJ384	pv-vgat	sr	Emx-DG-Ctrl	57.0861882437793	Emx-DG
JJ033	pv-vgat	all	Emx-POMT2-cKO	56.75232725842402	Emx-POMT2
JJ033	pv-vgat	sp	Emx-POMT2-cKO	58.468989640791065	Emx-POMT2
JJ033	pv-vgat	so	Emx-POMT2-cKO	47.98052134059009	Emx-POMT2
JJ033	pv-vgat	sr	Emx-POMT2-cKO	60.277136258660505	Emx-POMT2
JJ034	pv-vgat	all	Emx-POMT2-cKO	59.475704250850896	Emx-POMT2
JJ034	pv-vgat	sp	Emx-POMT2-cKO	61.86252771618625	Emx-POMT2
JJ034	pv-vgat	so	Emx-POMT2-cKO	55.091992744234254	Emx-POMT2
JJ034	pv-vgat	sr	Emx-POMT2-cKO	58.69565217391305	Emx-POMT2
JJ035	pv-vgat	all	Emx-POMT2-cKO	53.284813828059	Emx-POMT2
JJ035	pv-vgat	sp	Emx-POMT2-cKO	58.6585196500486	Emx-POMT2
JJ035	pv-vgat	so	Emx-POMT2-cKO	48.93617021276596	Emx-POMT2
JJ035	pv-vgat	sr	Emx-POMT2-cKO	47.1578947368421	Emx-POMT2
JJ036	pv-vgat	all	Emx-POMT2-cKO	67.52635542168674	Emx-POMT2
JJ036	pv-vgat	sp	Emx-POMT2-cKO	70.01124578283144	Emx-POMT2
JJ036	pv-vgat	so	Emx-POMT2-cKO	61.934856587263006	Emx-POMT2
JJ036	pv-vgat	sr	Emx-POMT2-cKO	67.94972505891594	Emx-POMT2
JJ037	pv-vgat	all	Emx-POMT2-Ctrl	48.02388543089925	Emx-POMT2
JJ037	pv-vgat	sp	Emx-POMT2-Ctrl	56.468424279583076	Emx-POMT2
JJ037	pv-vgat	so	Emx-POMT2-Ctrl	38.949454905847375	Emx-POMT2
JJ037	pv-vgat	sr	Emx-POMT2-Ctrl	39.77687626774848	Emx-POMT2
JJ038	pv-vgat	all	Emx-POMT2-Ctrl	43.75527935320381	Emx-POMT2
JJ038	pv-vgat	sp	Emx-POMT2-Ctrl	53.26832404629233	Emx-POMT2
JJ038	pv-vgat	so	Emx-POMT2-Ctrl	29.201430274135877	Emx-POMT2
JJ038	pv-vgat	sr	Emx-POMT2-Ctrl	32.83582089552239	Emx-POMT2
JJ039	pv-vgat	all	Emx-POMT2-Ctrl	65.00757126868129	Emx-POMT2
JJ039	pv-vgat	sp	Emx-POMT2-Ctrl	71.35663933247015	Emx-POMT2
JJ039	pv-vgat	so	Emx-POMT2-Ctrl	59.94306628710858	Emx-POMT2
JJ039	pv-vgat	sr	Emx-POMT2-Ctrl	55.57620817843866	Emx-POMT2
JJ040	pv-vgat	all	Emx-POMT2-Ctrl	52.588076675068876	Emx-POMT2
JJ040	pv-vgat	sp	Emx-POMT2-Ctrl	58.7962962962963	Emx-POMT2
JJ040	pv-vgat	so	Emx-POMT2-Ctrl	47.1348639783909	Emx-POMT2
JJ040	pv-vgat	sr	Emx-POMT2-Ctrl	47.21943887775551	Emx-POMT2
JJ041	pv-vgat	all	Emx-POMT2-Ctrl	58.54178119846069	Emx-POMT2
JJ041	pv-vgat	sp	Emx-POMT2-Ctrl	64.1458184417441	Emx-POMT2
JJ041	pv-vgat	so	Emx-POMT2-Ctrl	50.785094914459805	Emx-POMT2
JJ041	pv-vgat	sr	Emx-POMT2-Ctrl	55.56232855836635	Emx-POMT2
JJ042	pv-vgat	all	Emx-POMT2-Ctrl	53.894767783656675	Emx-POMT2
JJ042	pv-vgat	sp	Emx-POMT2-Ctrl	59.77366255144033	Emx-POMT2
JJ042	pv-vgat	so	Emx-POMT2-Ctrl	48.49624060150376	Emx-POMT2
JJ042	pv-vgat	sr	Emx-POMT2-Ctrl	48.932038834951456	Emx-POMT2
JJ043	pv-vgat	all	Emx-POMT2-Ctrl	54.73208072372999	Emx-POMT2
JJ043	pv-vgat	sp	Emx-POMT2-Ctrl	58.663674894041385	Emx-POMT2
JJ043	pv-vgat	so	Emx-POMT2-Ctrl	49.70653713823113	Emx-POMT2
JJ043	pv-vgat	sr	Emx-POMT2-Ctrl	52.546728971962615	Emx-POMT2
JJ044	pv-vgat	all	Emx-POMT2-Ctrl	51.79176977362295	Emx-POMT2
JJ044	pv-vgat	sp	Emx-POMT2-Ctrl	56.84584178498986	Emx-POMT2
JJ044	pv-vgat	so	Emx-POMT2-Ctrl	44.86447931526391	Emx-POMT2
JJ044	pv-vgat	sr	Emx-POMT2-Ctrl	49.354127284183996	Emx-POMT2
JJ137	pv-vgat	all	Emx-POMT2-cKO	64.82827277252365	Emx-POMT2
JJ137	pv-vgat	sp	Emx-POMT2-cKO	67.09481550677253	Emx-POMT2
JJ137	pv-vgat	so	Emx-POMT2-cKO	59.43979628955984	Emx-POMT2
JJ137	pv-vgat	sr	Emx-POMT2-cKO	65.85932315859323	Emx-POMT2
JJ138	pv-vgat	all	Emx-POMT2-cKO	63.44583292334941	Emx-POMT2
JJ138	pv-vgat	sp	Emx-POMT2-cKO	64.50856204550786	Emx-POMT2
JJ138	pv-vgat	so	Emx-POMT2-cKO	62.022553655874866	Emx-POMT2
JJ138	pv-vgat	sr	Emx-POMT2-cKO	62.45636305934624	Emx-POMT2
JJ139	pv-vgat	all	Emx-POMT2-cKO	62.39911553344389	Emx-POMT2
JJ139	pv-vgat	sp	Emx-POMT2-cKO	65.72136563876651	Emx-POMT2
JJ139	pv-vgat	so	Emx-POMT2-cKO	61.46419951729686	Emx-POMT2
JJ139	pv-vgat	sr	Emx-POMT2-cKO	58.2166040314315	Emx-POMT2
JJ140	pv-vgat	all	Emx-POMT2-cKO	54.69135802469136	Emx-POMT2
JJ140	pv-vgat	sp	Emx-POMT2-cKO	58.92439594699922	Emx-POMT2
JJ140	pv-vgat	so	Emx-POMT2-cKO	52.04048318641854	Emx-POMT2
JJ140	pv-vgat	sr	Emx-POMT2-cKO	51.14041339985745	Emx-POMT2
JJ141	pv-vgat	all	Emx-POMT2-Ctrl	56.34668048256976	Emx-POMT2
JJ141	pv-vgat	sp	Emx-POMT2-Ctrl	57.70351328191945	Emx-POMT2
JJ141	pv-vgat	so	Emx-POMT2-Ctrl	53.56647238412434	Emx-POMT2
JJ141	pv-vgat	sr	Emx-POMT2-Ctrl	56.027498158605454	Emx-POMT2
JJ142	pv-vgat	all	Emx-POMT2-Ctrl	45.31813591112394	Emx-POMT2
JJ142	pv-vgat	sp	Emx-POMT2-Ctrl	48.88278388278388	Emx-POMT2
JJ142	pv-vgat	so	Emx-POMT2-Ctrl	42.17826868738762	Emx-POMT2
JJ142	pv-vgat	sr	Emx-POMT2-Ctrl	43.12028406569019	Emx-POMT2
JJ143	pv-vgat	all	Emx-POMT2-Ctrl	52.09862290756164	Emx-POMT2
JJ143	pv-vgat	sp	Emx-POMT2-Ctrl	55.92203898050975	Emx-POMT2
JJ143	pv-vgat	so	Emx-POMT2-Ctrl	46.18401206636501	Emx-POMT2
JJ143	pv-vgat	sr	Emx-POMT2-Ctrl	51.40966628308401	Emx-POMT2
JJ144	pv-vgat	all	Emx-POMT2-Ctrl	54.3125	Emx-POMT2
JJ144	pv-vgat	sp	Emx-POMT2-Ctrl	57.08041958041958	Emx-POMT2
JJ144	pv-vgat	so	Emx-POMT2-Ctrl	51.103143960286815	Emx-POMT2
JJ144	pv-vgat	sr	Emx-POMT2-Ctrl	53.268845897264846	Emx-POMT2
JJ183	pv-vgat	all	Emx-POMT2-cKO	69.23560585646277	Emx-POMT2
JJ183	pv-vgat	sp	Emx-POMT2-cKO	72.1030042918455	Emx-POMT2
JJ183	pv-vgat	so	Emx-POMT2-cKO	66.76337846550612	Emx-POMT2
JJ183	pv-vgat	sr	Emx-POMT2-cKO	67.4224654678134	Emx-POMT2
JJ184	pv-vgat	all	Emx-POMT2-cKO	62.0849548728989	Emx-POMT2
JJ184	pv-vgat	sp	Emx-POMT2-cKO	66.5878458264365	Emx-POMT2
JJ184	pv-vgat	so	Emx-POMT2-cKO	59.15924276169265	Emx-POMT2
JJ184	pv-vgat	sr	Emx-POMT2-cKO	59.520451339915375	Emx-POMT2
JJ185	pv-vgat	all	Emx-POMT2-cKO	62.00956937799043	Emx-POMT2
JJ185	pv-vgat	sp	Emx-POMT2-cKO	68.62115127175367	Emx-POMT2
JJ185	pv-vgat	so	Emx-POMT2-cKO	53.82228490832158	Emx-POMT2
JJ185	pv-vgat	sr	Emx-POMT2-cKO	62.39620403321471	Emx-POMT2
JJ186	pv-vgat	all	Emx-POMT2-cKO	62.114911312908426	Emx-POMT2
JJ186	pv-vgat	sp	Emx-POMT2-cKO	69.4409309385277	Emx-POMT2
JJ186	pv-vgat	so	Emx-POMT2-cKO	52.07186322804984	Emx-POMT2
JJ186	pv-vgat	sr	Emx-POMT2-cKO	62.85126799177519	Emx-POMT2
JJ191	pv-vgat	all	Emx-POMT2-Ctrl	51.700024113817214	Emx-POMT2
JJ191	pv-vgat	sp	Emx-POMT2-Ctrl	52.49780893952673	Emx-POMT2
JJ191	pv-vgat	so	Emx-POMT2-Ctrl	50.580204778157	Emx-POMT2
JJ191	pv-vgat	sr	Emx-POMT2-Ctrl	51.168879745651765	Emx-POMT2
JJ192	pv-vgat	all	Emx-POMT2-Ctrl	60.42302822670738	Emx-POMT2
JJ192	pv-vgat	sp	Emx-POMT2-Ctrl	62.406277244986924	Emx-POMT2
JJ192	pv-vgat	so	Emx-POMT2-Ctrl	55.7968970380818	Emx-POMT2
JJ192	pv-vgat	sr	Emx-POMT2-Ctrl	60.95972992524717	Emx-POMT2
JJ193	pv-vgat	all	Emx-POMT2-Ctrl	52.53674027029023	Emx-POMT2
JJ193	pv-vgat	sp	Emx-POMT2-Ctrl	53.03319343761923	Emx-POMT2
JJ193	pv-vgat	so	Emx-POMT2-Ctrl	49.11257606490872	Emx-POMT2
JJ193	pv-vgat	sr	Emx-POMT2-Ctrl	54.53501722158438	Emx-POMT2
JJ194	pv-vgat	all	Emx-POMT2-Ctrl	46.02973531568771	Emx-POMT2
JJ194	pv-vgat	sp	Emx-POMT2-Ctrl	48.843693619813024	Emx-POMT2
JJ194	pv-vgat	so	Emx-POMT2-Ctrl	39.75227856975929	Emx-POMT2
JJ194	pv-vgat	sr	Emx-POMT2-Ctrl	47.54488427428077	Emx-POMT2
JJ199	pv-vgat	all	Emx-POMT2-Ctrl	50.77887420095575	Emx-POMT2
JJ199	pv-vgat	sp	Emx-POMT2-Ctrl	51.06578745591167	Emx-POMT2
JJ199	pv-vgat	so	Emx-POMT2-Ctrl	50.83673469387755	Emx-POMT2
JJ199	pv-vgat	sr	Emx-POMT2-Ctrl	49.73353229588574	Emx-POMT2
JJ200	pv-vgat	all	Emx-POMT2-Ctrl	42.5775309131786	Emx-POMT2
JJ200	pv-vgat	sp	Emx-POMT2-Ctrl	44.457409568261376	Emx-POMT2
JJ200	pv-vgat	so	Emx-POMT2-Ctrl	38.45371312309258	Emx-POMT2
JJ200	pv-vgat	sr	Emx-POMT2-Ctrl	44.30952380952381	Emx-POMT2
JJ201	pv-vgat	all	Emx-POMT2-Ctrl	59.5327604726101	Emx-POMT2
JJ201	pv-vgat	sp	Emx-POMT2-Ctrl	66.2701035470368	Emx-POMT2
JJ201	pv-vgat	so	Emx-POMT2-Ctrl	53.315909833387785	Emx-POMT2
JJ201	pv-vgat	sr	Emx-POMT2-Ctrl	55.63340807174888	Emx-POMT2
JJ202	pv-vgat	all	Emx-POMT2-Ctrl	52.65592475522319	Emx-POMT2
JJ202	pv-vgat	sp	Emx-POMT2-Ctrl	56.83101242002258	Emx-POMT2
JJ202	pv-vgat	so	Emx-POMT2-Ctrl	47.495779403489024	Emx-POMT2
JJ202	pv-vgat	sr	Emx-POMT2-Ctrl	51.08457226419693	Emx-POMT2
JJ061	pv-vgat	all	B4GAT1-Mutant	58.26951279126609	B4GAT1
JJ061	pv-vgat	sp	B4GAT1-Mutant	61.039837947332884	B4GAT1
JJ061	pv-vgat	so	B4GAT1-Mutant	55.56978233034571	B4GAT1
JJ061	pv-vgat	sr	B4GAT1-Mutant	54.80471171729696	B4GAT1
JJ062	pv-vgat	all	B4GAT1-Mutant	55.38909696213067	B4GAT1
JJ062	pv-vgat	sp	B4GAT1-Mutant	59.750532400365074	B4GAT1
JJ062	pv-vgat	so	B4GAT1-Mutant	50.67531064289573	B4GAT1
JJ062	pv-vgat	sr	B4GAT1-Mutant	52.205882352941174	B4GAT1
JJ063	pv-vgat	all	B4GAT1-Mutant	62.3124624924985	B4GAT1
JJ063	pv-vgat	sp	B4GAT1-Mutant	71.56236696466581	B4GAT1
JJ063	pv-vgat	so	B4GAT1-Mutant	51.13246396705559	B4GAT1
JJ063	pv-vgat	sr	B4GAT1-Mutant	57.29865771812081	B4GAT1
JJ064	pv-vgat	all	B4GAT1-Mutant	56.00772315461161	B4GAT1
JJ064	pv-vgat	sp	B4GAT1-Mutant	64.88663484486874	B4GAT1
JJ064	pv-vgat	so	B4GAT1-Mutant	38.59440142942228	B4GAT1
JJ064	pv-vgat	sr	B4GAT1-Mutant	55.111633372502936	B4GAT1
JJ065	pv-vgat	all	B4GAT1-Ctrl	44.727540500736374	B4GAT1
JJ065	pv-vgat	sp	B4GAT1-Ctrl	53.95189003436426	B4GAT1
JJ065	pv-vgat	so	B4GAT1-Ctrl	33.155934007450774	B4GAT1
JJ065	pv-vgat	sr	B4GAT1-Ctrl	39.464285714285715	B4GAT1
JJ066	pv-vgat	all	B4GAT1-Ctrl	45.80917237743806	B4GAT1
JJ066	pv-vgat	sp	B4GAT1-Ctrl	54.70198675496689	B4GAT1
JJ066	pv-vgat	so	B4GAT1-Ctrl	38.98668956633748	B4GAT1
JJ066	pv-vgat	sr	B4GAT1-Ctrl	40.23245417970496	B4GAT1
JJ067	pv-vgat	all	B4GAT1-Ctrl	37.062850031113875	B4GAT1
JJ067	pv-vgat	sp	B4GAT1-Ctrl	54.13223140495868	B4GAT1
JJ067	pv-vgat	so	B4GAT1-Ctrl	23.035117056856187	B4GAT1
JJ067	pv-vgat	sr	B4GAT1-Ctrl	28.450704225352112	B4GAT1
JJ068	pv-vgat	all	B4GAT1-Ctrl	44.31541052142608	B4GAT1
JJ068	pv-vgat	sp	B4GAT1-Ctrl	60.38473098887887	B4GAT1
JJ068	pv-vgat	so	B4GAT1-Ctrl	33.98692810457516	B4GAT1
JJ068	pv-vgat	sr	B4GAT1-Ctrl	33.50765782592454	B4GAT1
JJ069	pv-vgat	all	B4GAT1-Mutant	56.31356416409553	B4GAT1
JJ069	pv-vgat	sp	B4GAT1-Mutant	62.888122227698375	B4GAT1
JJ069	pv-vgat	so	B4GAT1-Mutant	54.10569105691057	B4GAT1
JJ069	pv-vgat	sr	B4GAT1-Mutant	46.10215053763441	B4GAT1
JJ070	pv-vgat	all	B4GAT1-Mutant	51.9888178913738	B4GAT1
JJ070	pv-vgat	sp	B4GAT1-Mutant	59.76944118796405	B4GAT1
JJ070	pv-vgat	so	B4GAT1-Mutant	50.7001321003963	B4GAT1
JJ070	pv-vgat	sr	B4GAT1-Mutant	41.774951617362454	B4GAT1
JJ071	pv-vgat	all	B4GAT1-Mutant	60.08323874385168	B4GAT1
JJ071	pv-vgat	sp	B4GAT1-Mutant	67.27702303603071	B4GAT1
JJ071	pv-vgat	so	B4GAT1-Mutant	48.812915479582145	B4GAT1
JJ071	pv-vgat	sr	B4GAT1-Mutant	59.171112022979074	B4GAT1
JJ072	pv-vgat	all	B4GAT1-Mutant	60.09964258637496	B4GAT1
JJ072	pv-vgat	sp	B4GAT1-Mutant	68.26950763029082	B4GAT1
JJ072	pv-vgat	so	B4GAT1-Mutant	53.93480408297662	B4GAT1
JJ072	pv-vgat	sr	B4GAT1-Mutant	55.60134881978269	B4GAT1
JJ073	pv-vgat	all	B4GAT1-Mutant	56.7559996264824	B4GAT1
JJ073	pv-vgat	sp	B4GAT1-Mutant	62.24168912848158	B4GAT1
JJ073	pv-vgat	so	B4GAT1-Mutant	51.87807881773399	B4GAT1
JJ073	pv-vgat	sr	B4GAT1-Mutant	53.41780593531177	B4GAT1
JJ074	pv-vgat	all	B4GAT1-Mutant	57.62159646264836	B4GAT1
JJ074	pv-vgat	sp	B4GAT1-Mutant	64.12729026036644	B4GAT1
JJ074	pv-vgat	so	B4GAT1-Mutant	49.40652818991098	B4GAT1
JJ074	pv-vgat	sr	B4GAT1-Mutant	53.6	B4GAT1
JJ075	pv-vgat	all	B4GAT1-Mutant	47.163947163947164	B4GAT1
JJ075	pv-vgat	sp	B4GAT1-Mutant	61.233082706766915	B4GAT1
JJ075	pv-vgat	so	B4GAT1-Mutant	35.68527918781726	B4GAT1
JJ075	pv-vgat	sr	B4GAT1-Mutant	36.72036348616274	B4GAT1
JJ076	pv-vgat	all	B4GAT1-Mutant	53.67747207845274	B4GAT1
JJ076	pv-vgat	sp	B4GAT1-Mutant	63.228995057660626	B4GAT1
JJ076	pv-vgat	so	B4GAT1-Mutant	47.8108581436077	B4GAT1
JJ076	pv-vgat	sr	B4GAT1-Mutant	45.6857855361596	B4GAT1
JJ081	pv-vgat	all	B4GAT1-Mutant	57.191639072847686	B4GAT1
JJ081	pv-vgat	sp	B4GAT1-Mutant	65.20383693045564	B4GAT1
JJ081	pv-vgat	so	B4GAT1-Mutant	45.811623246492985	B4GAT1
JJ081	pv-vgat	sr	B4GAT1-Mutant	54.85924932975871	B4GAT1
JJ082	pv-vgat	all	B4GAT1-Mutant	55.068012286090394	B4GAT1
JJ082	pv-vgat	sp	B4GAT1-Mutant	60.869565217391305	B4GAT1
JJ082	pv-vgat	so	B4GAT1-Mutant	47.03228045817424	B4GAT1
JJ082	pv-vgat	sr	B4GAT1-Mutant	54.86725663716814	B4GAT1
JJ083	pv-vgat	all	B4GAT1-Mutant	60.77305778798316	B4GAT1
JJ083	pv-vgat	sp	B4GAT1-Mutant	64.99123319696083	B4GAT1
JJ083	pv-vgat	so	B4GAT1-Mutant	54.386792452830186	B4GAT1
JJ083	pv-vgat	sr	B4GAT1-Mutant	59.72949389179756	B4GAT1
JJ084	pv-vgat	all	B4GAT1-Mutant	53.97306397306397	B4GAT1
JJ084	pv-vgat	sp	B4GAT1-Mutant	58.488469019171994	B4GAT1
JJ084	pv-vgat	so	B4GAT1-Mutant	48.58506648482782	B4GAT1
JJ084	pv-vgat	sr	B4GAT1-Mutant	52.84552845528455	B4GAT1
JJ089	pv-vgat	all	B4GAT1-Mutant	66.06444092914828	B4GAT1
JJ089	pv-vgat	sp	B4GAT1-Mutant	65.87374199451052	B4GAT1
JJ089	pv-vgat	so	B4GAT1-Mutant	65.31094200997114	B4GAT1
JJ089	pv-vgat	sr	B4GAT1-Mutant	66.40543364681295	B4GAT1
JJ090	pv-vgat	all	B4GAT1-Mutant	65.7014721653505	B4GAT1
JJ090	pv-vgat	sp	B4GAT1-Mutant	69.6969696969697	B4GAT1
JJ090	pv-vgat	so	B4GAT1-Mutant	64.61194506547429	B4GAT1
JJ090	pv-vgat	sr	B4GAT1-Mutant	61.5478366849482	B4GAT1
JJ091	pv-vgat	all	B4GAT1-Mutant	58.42572062084257	B4GAT1
JJ091	pv-vgat	sp	B4GAT1-Mutant	61.31487889273357	B4GAT1
JJ091	pv-vgat	so	B4GAT1-Mutant	56.963958460598654	B4GAT1
JJ091	pv-vgat	sr	B4GAT1-Mutant	55.46899345590526	B4GAT1
JJ092	pv-vgat	all	B4GAT1-Mutant	68.05989953558904	B4GAT1
JJ092	pv-vgat	sp	B4GAT1-Mutant	69.57467375543742	B4GAT1
JJ092	pv-vgat	so	B4GAT1-Mutant	63.95045632333768	B4GAT1
JJ092	pv-vgat	sr	B4GAT1-Mutant	69.26756352765321	B4GAT1
JJ097	pv-vgat	all	B4GAT1-Ctrl	67.4177701836822	B4GAT1
JJ097	pv-vgat	sp	B4GAT1-Ctrl	69.52522255192878	B4GAT1
JJ097	pv-vgat	so	B4GAT1-Ctrl	63.76012965964344	B4GAT1
JJ097	pv-vgat	sr	B4GAT1-Ctrl	68.22558459422284	B4GAT1
JJ098	pv-vgat	all	B4GAT1-Ctrl	64.99022935308032	B4GAT1
JJ098	pv-vgat	sp	B4GAT1-Ctrl	67.23149113660062	B4GAT1
JJ098	pv-vgat	so	B4GAT1-Ctrl	64.10499683744466	B4GAT1
JJ098	pv-vgat	sr	B4GAT1-Ctrl	61.75606171932402	B4GAT1
JJ099	pv-vgat	all	B4GAT1-Ctrl	48.01540780438788	B4GAT1
JJ099	pv-vgat	sp	B4GAT1-Ctrl	53.24590163934426	B4GAT1
JJ099	pv-vgat	so	B4GAT1-Ctrl	39.4975394975395	B4GAT1
JJ099	pv-vgat	sr	B4GAT1-Ctrl	50.32768978700164	B4GAT1
JJ100	pv-vgat	all	B4GAT1-Ctrl	63.634094596281045	B4GAT1
JJ100	pv-vgat	sp	B4GAT1-Ctrl	68.35405565423328	B4GAT1
JJ100	pv-vgat	so	B4GAT1-Ctrl	55.37832310838446	B4GAT1
JJ100	pv-vgat	sr	B4GAT1-Ctrl	64.9771689497717	B4GAT1
JJ105	pv-vgat	all	B4GAT1-Ctrl	62.775253407899335	B4GAT1
JJ105	pv-vgat	sp	B4GAT1-Ctrl	64.34892541087231	B4GAT1
JJ105	pv-vgat	so	B4GAT1-Ctrl	59.0882178804026	B4GAT1
JJ105	pv-vgat	sr	B4GAT1-Ctrl	63.60048573163327	B4GAT1
JJ106	pv-vgat	all	B4GAT1-Ctrl	61.21602947950253	B4GAT1
JJ106	pv-vgat	sp	B4GAT1-Ctrl	62.69418553040391	B4GAT1
JJ106	pv-vgat	so	B4GAT1-Ctrl	59.9671592775041	B4GAT1
JJ106	pv-vgat	sr	B4GAT1-Ctrl	59.68185989599266	B4GAT1
JJ107	pv-vgat	all	B4GAT1-Ctrl	65.45140651975221	B4GAT1
JJ107	pv-vgat	sp	B4GAT1-Ctrl	64.58916306283389	B4GAT1
JJ107	pv-vgat	so	B4GAT1-Ctrl	64.96837666900913	B4GAT1
JJ107	pv-vgat	sr	B4GAT1-Ctrl	66.25407166123779	B4GAT1
JJ108	pv-vgat	all	B4GAT1-Ctrl	70.47257675060365	B4GAT1
JJ108	pv-vgat	sp	B4GAT1-Ctrl	70.31467557783347	B4GAT1
JJ108	pv-vgat	so	B4GAT1-Ctrl	66.94847020933977	B4GAT1
JJ108	pv-vgat	sr	B4GAT1-Ctrl	73.01038062283737	B4GAT1
JJ215	pv-vgat	all	FKRP-Mutant	51.56760514424748	FKRP
JJ215	pv-vgat	sp	FKRP-Mutant	46.68270883465108	FKRP
JJ215	pv-vgat	so	FKRP-Mutant	53.16836262719704	FKRP
JJ215	pv-vgat	sr	FKRP-Mutant	56.08203677510608	FKRP
JJ216	pv-vgat	all	FKRP-Mutant	64.26884650317893	FKRP
JJ216	pv-vgat	sp	FKRP-Mutant	60.638297872340424	FKRP
JJ216	pv-vgat	so	FKRP-Mutant	67.85845927018062	FKRP
JJ216	pv-vgat	sr	FKRP-Mutant	65.62675660483417	FKRP
JJ217	pv-vgat	all	FKRP-Mutant	43.363122079199805	FKRP
JJ217	pv-vgat	sp	FKRP-Mutant	46.332350049164205	FKRP
JJ217	pv-vgat	so	FKRP-Mutant	39.774964838255976	FKRP
JJ217	pv-vgat	sr	FKRP-Mutant	42.142254709024456	FKRP
JJ218	pv-vgat	all	FKRP-Mutant	53.022782232404225	FKRP
JJ218	pv-vgat	sp	FKRP-Mutant	52.064292467696184	FKRP
JJ218	pv-vgat	so	FKRP-Mutant	52.429781542576904	FKRP
JJ218	pv-vgat	sr	FKRP-Mutant	53.95329782875871	FKRP
JJ219	pv-vgat	all	FKRP-Ctrl	61.57092295126599	FKRP
JJ219	pv-vgat	sp	FKRP-Ctrl	58.591282375236894	FKRP
JJ219	pv-vgat	so	FKRP-Ctrl	63.82874015748032	FKRP
JJ219	pv-vgat	sr	FKRP-Ctrl	62.81431334622824	FKRP
JJ220	pv-vgat	all	FKRP-Ctrl	39.965167503329575	FKRP
JJ220	pv-vgat	sp	FKRP-Ctrl	41.3620430645969	FKRP
JJ220	pv-vgat	so	FKRP-Ctrl	39.26460932370322	FKRP
JJ220	pv-vgat	sr	FKRP-Ctrl	38.257993384785	FKRP
JJ221	pv-vgat	all	FKRP-Ctrl	43.17838816782373	FKRP
JJ221	pv-vgat	sp	FKRP-Ctrl	46.974398758727695	FKRP
JJ221	pv-vgat	so	FKRP-Ctrl	38.924339106654514	FKRP
JJ221	pv-vgat	sr	FKRP-Ctrl	42.61057173678533	FKRP
JJ222	pv-vgat	all	FKRP-Ctrl	44.29007116231786	FKRP
JJ222	pv-vgat	sp	FKRP-Ctrl	45.32633650377173	FKRP
JJ222	pv-vgat	so	FKRP-Ctrl	45.83046175051688	FKRP
JJ222	pv-vgat	sr	FKRP-Ctrl	40.97174362508615	FKRP
JJ223	pv-vgat	all	FKRP-Ctrl	47.723968236215185	FKRP
JJ223	pv-vgat	sp	FKRP-Ctrl	47.63848396501458	FKRP
JJ223	pv-vgat	so	FKRP-Ctrl	48.498669707335615	FKRP
JJ223	pv-vgat	sr	FKRP-Ctrl	46.72245467224547	FKRP
JJ224	pv-vgat	all	FKRP-Ctrl	44.48398576512456	FKRP
JJ224	pv-vgat	sp	FKRP-Ctrl	45.32231404958678	FKRP
JJ224	pv-vgat	so	FKRP-Ctrl	42.833263685750104	FKRP
JJ224	pv-vgat	sr	FKRP-Ctrl	44.30939226519337	FKRP
JJ225	pv-vgat	all	FKRP-Ctrl	37.31294014084507	FKRP
JJ225	pv-vgat	sp	FKRP-Ctrl	41.54754505904288	FKRP
JJ225	pv-vgat	so	FKRP-Ctrl	32.1863580998782	FKRP
JJ225	pv-vgat	sr	FKRP-Ctrl	37.947122861586315	FKRP
JJ250	pv-vgat	all	FKRP-Mutant	18.0421025442335	FKRP
JJ250	pv-vgat	sp	FKRP-Mutant	20.908460471567267	FKRP
JJ250	pv-vgat	so	FKRP-Mutant	18.14236111111111	FKRP
JJ250	pv-vgat	sr	FKRP-Mutant	14.600550964187327	FKRP
JJ251	pv-vgat	all	FKRP-Mutant	64.55574283650373	FKRP
JJ251	pv-vgat	sp	FKRP-Mutant	67.19450253958769	FKRP
JJ251	pv-vgat	so	FKRP-Mutant	61.01552664708351	FKRP
JJ251	pv-vgat	sr	FKRP-Mutant	64.0527950310559	FKRP
JJ252	pv-vgat	all	FKRP-Mutant	59.93946731234867	FKRP
JJ252	pv-vgat	sp	FKRP-Mutant	61.6846105129829	FKRP
JJ252	pv-vgat	so	FKRP-Mutant	55.26212061489949	FKRP
JJ252	pv-vgat	sr	FKRP-Mutant	61.59844054580897	FKRP
JJ253	pv-vgat	all	FKRP-Mutant	60.98202542744411	FKRP
JJ253	pv-vgat	sp	FKRP-Mutant	61.79841316485454	FKRP
JJ253	pv-vgat	so	FKRP-Mutant	58.10306198655713	FKRP
JJ253	pv-vgat	sr	FKRP-Mutant	62.4055208675649	FKRP
JJ258	pv-vgat	all	FKRP-Ctrl	51.81475371199623	FKRP
JJ258	pv-vgat	sp	FKRP-Ctrl	52.41269841269841	FKRP
JJ258	pv-vgat	so	FKRP-Ctrl	53.55746677091478	FKRP
JJ258	pv-vgat	sr	FKRP-Ctrl	48.74010079193665	FKRP
JJ259	pv-vgat	all	FKRP-Ctrl	53.19845284141625	FKRP
JJ259	pv-vgat	sp	FKRP-Ctrl	53.60748584092588	FKRP
JJ259	pv-vgat	so	FKRP-Ctrl	52.7536231884058	FKRP
JJ259	pv-vgat	sr	FKRP-Ctrl	52.51379521765788	FKRP
JJ260	pv-vgat	all	FKRP-Ctrl	58.85054617676266	FKRP
JJ260	pv-vgat	sp	FKRP-Ctrl	62.152530292230935	FKRP
JJ260	pv-vgat	so	FKRP-Ctrl	54.795597484276726	FKRP
JJ260	pv-vgat	sr	FKRP-Ctrl	58.75831485587583	FKRP
JJ261	pv-vgat	all	FKRP-Ctrl	60.83234558145661	FKRP
JJ261	pv-vgat	sp	FKRP-Ctrl	61.34609447360297	FKRP
JJ261	pv-vgat	so	FKRP-Ctrl	61.2263300270514	FKRP
JJ261	pv-vgat	sr	FKRP-Ctrl	59.00562851782364	FKRP
JJ334	pv-vgat	all	FKRP-Mutant	48.46904059877523	FKRP
JJ334	pv-vgat	sp	FKRP-Mutant	48.72464350271139	FKRP
JJ334	pv-vgat	so	FKRP-Mutant	47.00712589073634	FKRP
JJ334	pv-vgat	sr	FKRP-Mutant	49.10846953937593	FKRP
JJ335	pv-vgat	all	FKRP-Mutant	37.76655866174365	FKRP
JJ335	pv-vgat	sp	FKRP-Mutant	40.53388090349076	FKRP
JJ335	pv-vgat	so	FKRP-Mutant	32.12548638132296	FKRP
JJ335	pv-vgat	sr	FKRP-Mutant	39.58235570154857	FKRP
JJ336	pv-vgat	all	FKRP-Mutant	49.2739435470713	FKRP
JJ336	pv-vgat	sp	FKRP-Mutant	49.618653301372845	FKRP
JJ336	pv-vgat	so	FKRP-Mutant	45.39559014267186	FKRP
JJ336	pv-vgat	sr	FKRP-Mutant	52.17619297325643	FKRP
JJ337	pv-vgat	all	FKRP-Mutant	45.41383016839843	FKRP
JJ337	pv-vgat	sp	FKRP-Mutant	46.39121338912134	FKRP
JJ337	pv-vgat	so	FKRP-Mutant	44.077356970185335	FKRP
JJ337	pv-vgat	sr	FKRP-Mutant	44.89908764169201	FKRP
JJ338	pv-vgat	all	FKRP-Ctrl	42.05756929637526	FKRP
JJ338	pv-vgat	sp	FKRP-Ctrl	45.37681447603897	FKRP
JJ338	pv-vgat	so	FKRP-Ctrl	38.163612318156055	FKRP
JJ338	pv-vgat	sr	FKRP-Ctrl	42.360221937686724	FKRP
JJ339	pv-vgat	all	FKRP-Ctrl	43.28134845620668	FKRP
JJ339	pv-vgat	sp	FKRP-Ctrl	47.459629775502165	FKRP
JJ339	pv-vgat	so	FKRP-Ctrl	36.138328530259365	FKRP
JJ339	pv-vgat	sr	FKRP-Ctrl	43.55576969404963	FKRP
JJ340	pv-vgat	all	FKRP-Ctrl	45.18696397941681	FKRP
JJ340	pv-vgat	sp	FKRP-Ctrl	45.604395604395606	FKRP
JJ340	pv-vgat	so	FKRP-Ctrl	43.2404108153427	FKRP
JJ340	pv-vgat	sr	FKRP-Ctrl	46.00416956219597	FKRP
JJ341	pv-vgat	all	FKRP-Ctrl	46.67812142038946	FKRP
JJ341	pv-vgat	sp	FKRP-Ctrl	47.40015071590053	FKRP
JJ341	pv-vgat	so	FKRP-Ctrl	42.19785241032671	FKRP
JJ341	pv-vgat	sr	FKRP-Ctrl	49.74262985493683	FKRP
JJ226	pv-vgat	all	ICD-Mutant	52.76927003573252	ICD
JJ226	pv-vgat	sp	ICD-Mutant	57.40929128518142	ICD
JJ226	pv-vgat	so	ICD-Mutant	52.519459238017205	ICD
JJ226	pv-vgat	sr	ICD-Mutant	46.82246822468225	ICD
JJ227	pv-vgat	all	ICD-Mutant	56.69204322200393	ICD
JJ227	pv-vgat	sp	ICD-Mutant	60.78125	ICD
JJ227	pv-vgat	so	ICD-Mutant	56.56460819927348	ICD
JJ227	pv-vgat	sr	ICD-Mutant	51.96013289036545	ICD
JJ228	pv-vgat	all	ICD-Mutant	62.184397163120565	ICD
JJ228	pv-vgat	sp	ICD-Mutant	66.18606247854446	ICD
JJ228	pv-vgat	so	ICD-Mutant	58.585428206220705	ICD
JJ228	pv-vgat	sr	ICD-Mutant	59.340044742729305	ICD
JJ229	pv-vgat	all	ICD-Mutant	48.32260250762453	ICD
JJ229	pv-vgat	sp	ICD-Mutant	54.646943901758306	ICD
JJ229	pv-vgat	so	ICD-Mutant	44.2792501616031	ICD
JJ229	pv-vgat	sr	ICD-Mutant	43.047882136279924	ICD
JJ234	pv-vgat	all	ICD-Ctrl	55.96843143702729	ICD
JJ234	pv-vgat	sp	ICD-Ctrl	59.30133484805453	ICD
JJ234	pv-vgat	so	ICD-Ctrl	55.34615384615385	ICD
JJ234	pv-vgat	sr	ICD-Ctrl	52.06528980679547	ICD
JJ235	pv-vgat	all	ICD-Ctrl	56.473862536302036	ICD
JJ235	pv-vgat	sp	ICD-Ctrl	59.38471100062151	ICD
JJ235	pv-vgat	so	ICD-Ctrl	53.17769130998703	ICD
JJ235	pv-vgat	sr	ICD-Ctrl	55.17746066593487	ICD
JJ236	pv-vgat	all	ICD-Ctrl	60.8762218819927	ICD
JJ236	pv-vgat	sp	ICD-Ctrl	61.04039845047039	ICD
JJ236	pv-vgat	so	ICD-Ctrl	59.82582355168497	ICD
JJ236	pv-vgat	sr	ICD-Ctrl	60.82289803220036	ICD
JJ237	pv-vgat	all	ICD-Ctrl	14.421597426213456	ICD
JJ237	pv-vgat	sp	ICD-Ctrl	17.5748031496063	ICD
JJ237	pv-vgat	so	ICD-Ctrl	14.64728056004308	ICD
JJ237	pv-vgat	sr	ICD-Ctrl	9.163911195087389	ICD
JJ294	pv-vgat	all	ICD-Mutant	51.51693234408286	ICD
JJ294	pv-vgat	sp	ICD-Mutant	47.89867587795049	ICD
JJ294	pv-vgat	so	ICD-Mutant	54.80417018878558	ICD
JJ294	pv-vgat	sr	ICD-Mutant	51.414898044111524	ICD
JJ295	pv-vgat	all	ICD-Mutant	49.321455912032846	ICD
JJ295	pv-vgat	sp	ICD-Mutant	46.0304054054054	ICD
JJ295	pv-vgat	so	ICD-Mutant	52.052545155993435	ICD
JJ295	pv-vgat	sr	ICD-Mutant	50.948905109489054	ICD
JJ296	pv-vgat	all	ICD-Mutant	44.58938085614551	ICD
JJ296	pv-vgat	sp	ICD-Mutant	44.033184428844926	ICD
JJ296	pv-vgat	so	ICD-Mutant	46.881053855094926	ICD
JJ296	pv-vgat	sr	ICD-Mutant	43.229744728079915	ICD
JJ297	pv-vgat	all	ICD-Mutant	44.46284902981543	ICD
JJ297	pv-vgat	sp	ICD-Mutant	44.79283314669653	ICD
JJ297	pv-vgat	so	ICD-Mutant	45.39660056657224	ICD
JJ297	pv-vgat	sr	ICD-Mutant	43.2161921708185	ICD
JJ302	pv-vgat	all	ICD-Mutant	55.68481464246936	ICD
JJ302	pv-vgat	sp	ICD-Mutant	52.85530959255694	ICD
JJ302	pv-vgat	so	ICD-Mutant	57.442489851150206	ICD
JJ302	pv-vgat	sr	ICD-Mutant	58.15334773218142	ICD
JJ303	pv-vgat	all	ICD-Mutant	49.387084544420574	ICD
JJ303	pv-vgat	sp	ICD-Mutant	48.97959183673469	ICD
JJ303	pv-vgat	so	ICD-Mutant	49.89334470989761	ICD
JJ303	pv-vgat	sr	ICD-Mutant	49.034668881046294	ICD
JJ304	pv-vgat	all	ICD-Mutant	47.83289445591061	ICD
JJ304	pv-vgat	sp	ICD-Mutant	48.255613126079446	ICD
JJ304	pv-vgat	so	ICD-Mutant	47.17918737211342	ICD
JJ304	pv-vgat	sr	ICD-Mutant	47.31717422829915	ICD
JJ305	pv-vgat	all	ICD-Mutant	52.112086992890006	ICD
JJ305	pv-vgat	sp	ICD-Mutant	50.019076688286916	ICD
JJ305	pv-vgat	so	ICD-Mutant	53.733133433283356	ICD
JJ305	pv-vgat	sr	ICD-Mutant	53.43035343035343	ICD
JJ310	pv-vgat	all	ICD-Ctrl	52.467695620961955	ICD
JJ310	pv-vgat	sp	ICD-Ctrl	53.092577813248205	ICD
JJ310	pv-vgat	so	ICD-Ctrl	53.904761904761905	ICD
JJ310	pv-vgat	sr	ICD-Ctrl	49.80011422044546	ICD
JJ311	pv-vgat	all	ICD-Ctrl	63.32718705183364	ICD
JJ311	pv-vgat	sp	ICD-Ctrl	61.598302687411596	ICD
JJ311	pv-vgat	so	ICD-Ctrl	63.653920432599456	ICD
JJ311	pv-vgat	sr	ICD-Ctrl	65.09401709401709	ICD
JJ312	pv-vgat	all	ICD-Ctrl	56.39821934439498	ICD
JJ312	pv-vgat	sp	ICD-Ctrl	53.17120622568093	ICD
JJ312	pv-vgat	so	ICD-Ctrl	59.84197870147715	ICD
JJ312	pv-vgat	sr	ICD-Ctrl	57.48141263940521	ICD
JJ313	pv-vgat	all	ICD-Ctrl	59.73524544953116	ICD
JJ313	pv-vgat	sp	ICD-Ctrl	59.79575382961569	ICD
JJ313	pv-vgat	so	ICD-Ctrl	59.8357111975789	ICD
JJ313	pv-vgat	sr	ICD-Ctrl	59.02342461233916	ICD
JJ318	pv-vgat	all	ICD-Ctrl	57.24591419816139	ICD
JJ318	pv-vgat	sp	ICD-Ctrl	54.72678511565538	ICD
JJ318	pv-vgat	so	ICD-Ctrl	57.30082935410907	ICD
JJ318	pv-vgat	sr	ICD-Ctrl	59.37007874015748	ICD
JJ319	pv-vgat	all	ICD-Ctrl	61.929020207165905	ICD
JJ319	pv-vgat	sp	ICD-Ctrl	60.114542851298836	ICD
JJ319	pv-vgat	so	ICD-Ctrl	63.99647887323944	ICD
JJ319	pv-vgat	sr	ICD-Ctrl	61.44785981039931	ICD
JJ320	pv-vgat	all	ICD-Ctrl	54.76501807553265	ICD
JJ320	pv-vgat	sp	ICD-Ctrl	52.29043908002281	ICD
JJ320	pv-vgat	so	ICD-Ctrl	54.537521815008724	ICD
JJ320	pv-vgat	sr	ICD-Ctrl	57.554625755462574	ICD
JJ321	pv-vgat	all	ICD-Ctrl	54.1953125	ICD
JJ321	pv-vgat	sp	ICD-Ctrl	53.13100268920476	ICD
JJ321	pv-vgat	so	ICD-Ctrl	55.23780854906683	ICD
JJ321	pv-vgat	sr	ICD-Ctrl	54.28370786516854	ICD
