# Supplementary material for: Inhibitory CCK+ basket synapse defects in mouse models of dystroglycanopathy
Source: eLife. 2024 Jan 5;12:RP87965. doi: 10.7554/eLife.87965 (PMC10942650; doi:10.7554/eLife.87965)
Supplement: Figure 5—source data 1. [file elife-87965-fig5-data1.csv]

Image	Marker	Condition	Experiment	Region	Density
JJ109	vgat	Emx-DG-cKO	Emx-DG	All	42.33899242671674
JJ109	vgat	Emx-DG-cKO	Emx-DG	SP	47.05037869191314
JJ109	vgat	Emx-DG-cKO	Emx-DG	SR	39.809490276225624
JJ109	vgat	Emx-DG-cKO	Emx-DG	SO	40.082505745544424
JJ110	vgat	Emx-DG-cKO	Emx-DG	All	43.56629507922073
JJ110	vgat	Emx-DG-cKO	Emx-DG	SP	48.990927587623645
JJ110	vgat	Emx-DG-cKO	Emx-DG	SR	41.63616902644452
JJ110	vgat	Emx-DG-cKO	Emx-DG	SO	39.47424426393125
JJ111	vgat	Emx-DG-cKO	Emx-DG	All	46.85945857858695
JJ111	vgat	Emx-DG-cKO	Emx-DG	SP	50.21656905039866
JJ111	vgat	Emx-DG-cKO	Emx-DG	SR	43.92054990697033
JJ111	vgat	Emx-DG-cKO	Emx-DG	SO	45.67237321786281
JJ112	vgat	Emx-DG-cKO	Emx-DG	All	51.96537373960234
JJ112	vgat	Emx-DG-cKO	Emx-DG	SP	54.78799111670499
JJ112	vgat	Emx-DG-cKO	Emx-DG	SR	50.32948867136104
JJ112	vgat	Emx-DG-cKO	Emx-DG	SO	49.914101117810596
JJ113	vgat	Emx-DG-cKO	Emx-DG	All	47.7643326221573
JJ113	vgat	Emx-DG-cKO	Emx-DG	SP	51.73091959849898
JJ113	vgat	Emx-DG-cKO	Emx-DG	SR	45.416555626425136
JJ113	vgat	Emx-DG-cKO	Emx-DG	SO	45.16729464920335
JJ114	vgat	Emx-DG-cKO	Emx-DG	All	50.25323187534182
JJ114	vgat	Emx-DG-cKO	Emx-DG	SP	53.70412789346275
JJ114	vgat	Emx-DG-cKO	Emx-DG	SR	48.68198566635191
JJ114	vgat	Emx-DG-cKO	Emx-DG	SO	47.75207192063635
JJ115	vgat	Emx-DG-cKO	Emx-DG	All	48.66583539535974
JJ115	vgat	Emx-DG-cKO	Emx-DG	SP	53.22235485455783
JJ115	vgat	Emx-DG-cKO	Emx-DG	SR	46.461229763601
JJ115	vgat	Emx-DG-cKO	Emx-DG	SO	45.89019982681063
JJ118	vgat	Emx-DG-Ctrl	Emx-DG	All	43.259887995655106
JJ118	vgat	Emx-DG-Ctrl	Emx-DG	SP	49.21931500867519
JJ118	vgat	Emx-DG-Ctrl	Emx-DG	SR	41.40141699661195
JJ118	vgat	Emx-DG-Ctrl	Emx-DG	SO	36.2533151738264
JJ119	vgat	Emx-DG-Ctrl	Emx-DG	All	44.14877192930015
JJ119	vgat	Emx-DG-Ctrl	Emx-DG	SP	49.59687497566282
JJ119	vgat	Emx-DG-Ctrl	Emx-DG	SR	46.19499865362683
JJ119	vgat	Emx-DG-Ctrl	Emx-DG	SO	35.04820327342383
JJ120	vgat	Emx-DG-Ctrl	Emx-DG	All	41.22465622222599
JJ120	vgat	Emx-DG-Ctrl	Emx-DG	SP	47.21665449153003
JJ120	vgat	Emx-DG-Ctrl	Emx-DG	SR	38.72614758181101
JJ120	vgat	Emx-DG-Ctrl	Emx-DG	SO	34.3579318201527
JJ121	vgat	Emx-DG-Ctrl	Emx-DG	All	48.94222603015034
JJ121	vgat	Emx-DG-Ctrl	Emx-DG	SP	52.62873096082026
JJ121	vgat	Emx-DG-Ctrl	Emx-DG	SR	46.86842515970268
JJ121	vgat	Emx-DG-Ctrl	Emx-DG	SO	45.96733952558298
JJ122	vgat	Emx-DG-Ctrl	Emx-DG	All	46.0053934026952
JJ122	vgat	Emx-DG-Ctrl	Emx-DG	SP	50.533631996950994
JJ122	vgat	Emx-DG-Ctrl	Emx-DG	SR	43.35992035090531
JJ122	vgat	Emx-DG-Ctrl	Emx-DG	SO	42.16024247189319
JJ123	vgat	Emx-DG-Ctrl	Emx-DG	All	46.65817603119882
JJ123	vgat	Emx-DG-Ctrl	Emx-DG	SP	50.27781379248534
JJ123	vgat	Emx-DG-Ctrl	Emx-DG	SR	44.18251839391154
JJ123	vgat	Emx-DG-Ctrl	Emx-DG	SO	44.86709129151103
JJ124	vgat	Emx-DG-Ctrl	Emx-DG	All	44.8342913541669
JJ124	vgat	Emx-DG-Ctrl	Emx-DG	SP	50.16632749354694
JJ124	vgat	Emx-DG-Ctrl	Emx-DG	SR	42.27700548454144
JJ124	vgat	Emx-DG-Ctrl	Emx-DG	SO	40.9510762782329
JJ125	vgat	Emx-DG-cKO	Emx-DG	All	43.90635600308158
JJ125	vgat	Emx-DG-cKO	Emx-DG	SP	47.85631612147936
JJ125	vgat	Emx-DG-cKO	Emx-DG	SR	41.20140207603301
JJ125	vgat	Emx-DG-cKO	Emx-DG	SO	41.45125378906049
JJ126	vgat	Emx-DG-cKO	Emx-DG	All	45.726974926017064
JJ126	vgat	Emx-DG-cKO	Emx-DG	SP	48.55948200635792
JJ126	vgat	Emx-DG-cKO	Emx-DG	SR	43.291991290593764
JJ126	vgat	Emx-DG-cKO	Emx-DG	SO	44.42837687323667
JJ127	vgat	Emx-DG-cKO	Emx-DG	All	46.62687204953979
JJ127	vgat	Emx-DG-cKO	Emx-DG	SP	50.18720343858615
JJ127	vgat	Emx-DG-cKO	Emx-DG	SR	45.759764733711776
JJ127	vgat	Emx-DG-cKO	Emx-DG	SO	43.61541687388065
JJ128	vgat	Emx-DG-cKO	Emx-DG	All	43.59708820589353
JJ128	vgat	Emx-DG-cKO	Emx-DG	SP	47.954531583774
JJ128	vgat	Emx-DG-cKO	Emx-DG	SR	42.48510891332085
JJ128	vgat	Emx-DG-cKO	Emx-DG	SO	39.815220423778364
JJ161	vgat	Emx-DG-cKO	Emx-DG	All	44.30847878653615
JJ161	vgat	Emx-DG-cKO	Emx-DG	SP	50.23793644801101
JJ161	vgat	Emx-DG-cKO	Emx-DG	SR	40.62694505159385
JJ161	vgat	Emx-DG-cKO	Emx-DG	SO	41.70444076916724
JJ162	vgat	Emx-DG-cKO	Emx-DG	All	43.30006368288666
JJ162	vgat	Emx-DG-cKO	Emx-DG	SP	48.640040867479165
JJ162	vgat	Emx-DG-cKO	Emx-DG	SR	39.620106318669656
JJ162	vgat	Emx-DG-cKO	Emx-DG	SO	40.12029759616173
JJ163	vgat	Emx-DG-cKO	Emx-DG	All	42.86266453252404
JJ163	vgat	Emx-DG-cKO	Emx-DG	SP	48.650240373740594
JJ163	vgat	Emx-DG-cKO	Emx-DG	SR	40.75283775693296
JJ163	vgat	Emx-DG-cKO	Emx-DG	SO	39.135401474258934
JJ164	vgat	Emx-DG-cKO	Emx-DG	All	40.768476773919176
JJ164	vgat	Emx-DG-cKO	Emx-DG	SP	46.77724339461639
JJ164	vgat	Emx-DG-cKO	Emx-DG	SR	37.30534193498705
JJ164	vgat	Emx-DG-cKO	Emx-DG	SO	37.887504294160934
JJ165	vgat	Emx-DG-Ctrl	Emx-DG	All	43.0343635101255
JJ165	vgat	Emx-DG-Ctrl	Emx-DG	SP	49.992265544901805
JJ165	vgat	Emx-DG-Ctrl	Emx-DG	SR	39.43301696583301
JJ165	vgat	Emx-DG-Ctrl	Emx-DG	SO	38.6443608573053
JJ166	vgat	Emx-DG-Ctrl	Emx-DG	All	45.90733964265005
JJ166	vgat	Emx-DG-Ctrl	Emx-DG	SP	51.57841264483342
JJ166	vgat	Emx-DG-Ctrl	Emx-DG	SR	43.32554983469434
JJ166	vgat	Emx-DG-Ctrl	Emx-DG	SO	42.436123177828435
JJ167	vgat	Emx-DG-Ctrl	Emx-DG	All	43.387911319688484
JJ167	vgat	Emx-DG-Ctrl	Emx-DG	SP	49.89880512032457
JJ167	vgat	Emx-DG-Ctrl	Emx-DG	SR	40.88489766230649
JJ167	vgat	Emx-DG-Ctrl	Emx-DG	SO	38.73504682069188
JJ168	vgat	Emx-DG-Ctrl	Emx-DG	All	42.10285902927018
JJ168	vgat	Emx-DG-Ctrl	Emx-DG	SP	49.69882868337969
JJ168	vgat	Emx-DG-Ctrl	Emx-DG	SR	38.59238746501667
JJ168	vgat	Emx-DG-Ctrl	Emx-DG	SO	36.78445517482125
JJ169	vgat	Emx-DG-Ctrl	Emx-DG	All	46.17951366889562
JJ169	vgat	Emx-DG-Ctrl	Emx-DG	SP	52.00534168622474
JJ169	vgat	Emx-DG-Ctrl	Emx-DG	SR	42.94022836918309
JJ169	vgat	Emx-DG-Ctrl	Emx-DG	SO	42.998897202847
JJ170	vgat	Emx-DG-Ctrl	Emx-DG	All	45.30607141871649
JJ170	vgat	Emx-DG-Ctrl	Emx-DG	SP	51.375382255692976
JJ170	vgat	Emx-DG-Ctrl	Emx-DG	SR	42.40875433132242
JJ170	vgat	Emx-DG-Ctrl	Emx-DG	SO	41.5088872128883
JJ171	vgat	Emx-DG-Ctrl	Emx-DG	All	40.85165180332305
JJ171	vgat	Emx-DG-Ctrl	Emx-DG	SP	47.086082591373795
JJ171	vgat	Emx-DG-Ctrl	Emx-DG	SR	38.72783571833314
JJ171	vgat	Emx-DG-Ctrl	Emx-DG	SO	34.95373795171434
JJ172	vgat	Emx-DG-Ctrl	Emx-DG	All	43.59808210191554
JJ172	vgat	Emx-DG-Ctrl	Emx-DG	SP	48.91545466751677
JJ172	vgat	Emx-DG-Ctrl	Emx-DG	SR	41.044320461341854
JJ172	vgat	Emx-DG-Ctrl	Emx-DG	SO	38.729801914241314
JJ173	vgat	Emx-DG-cKO	Emx-DG	All	41.54720779607925
JJ173	vgat	Emx-DG-cKO	Emx-DG	SP	46.841677642784774
JJ173	vgat	Emx-DG-cKO	Emx-DG	SR	37.781615958049336
JJ173	vgat	Emx-DG-cKO	Emx-DG	SO	39.747094711791355
JJ174	vgat	Emx-DG-cKO	Emx-DG	All	39.616736822560036
JJ174	vgat	Emx-DG-cKO	Emx-DG	SP	45.78170534910269
JJ174	vgat	Emx-DG-cKO	Emx-DG	SR	37.40731583763853
JJ174	vgat	Emx-DG-cKO	Emx-DG	SO	35.603335376965326
JJ175	vgat	Emx-DG-Ctrl	Emx-DG	All	47.395317718790174
JJ175	vgat	Emx-DG-Ctrl	Emx-DG	SP	51.44436516402329
JJ175	vgat	Emx-DG-Ctrl	Emx-DG	SR	45.30251433503068
JJ175	vgat	Emx-DG-Ctrl	Emx-DG	SO	44.514276432349256
JJ176	vgat	Emx-DG-Ctrl	Emx-DG	All	45.27618031882208
JJ176	vgat	Emx-DG-Ctrl	Emx-DG	SP	50.3530281078433
JJ176	vgat	Emx-DG-Ctrl	Emx-DG	SR	42.197949532710055
JJ176	vgat	Emx-DG-Ctrl	Emx-DG	SO	42.30042386114364
JJ177	vgat	Emx-DG-Ctrl	Emx-DG	All	43.14975153715662
JJ177	vgat	Emx-DG-Ctrl	Emx-DG	SP	49.75346437831415
JJ177	vgat	Emx-DG-Ctrl	Emx-DG	SR	40.465244355997115
JJ177	vgat	Emx-DG-Ctrl	Emx-DG	SO	36.91017742429754
JJ178	vgat	Emx-DG-Ctrl	Emx-DG	All	43.368301600243775
JJ178	vgat	Emx-DG-Ctrl	Emx-DG	SP	49.55450108695027
JJ178	vgat	Emx-DG-Ctrl	Emx-DG	SR	39.98445010884803
JJ178	vgat	Emx-DG-Ctrl	Emx-DG	SO	38.235119924815855
JJ179	vgat	Emx-DG-Ctrl	Emx-DG	All	45.892712512740864
JJ179	vgat	Emx-DG-Ctrl	Emx-DG	SP	49.47160029928307
JJ179	vgat	Emx-DG-Ctrl	Emx-DG	SR	44.54253654282268
JJ179	vgat	Emx-DG-Ctrl	Emx-DG	SO	43.58834443119105
JJ180	vgat	Emx-DG-Ctrl	Emx-DG	All	45.88565001115822
JJ180	vgat	Emx-DG-Ctrl	Emx-DG	SP	50.498931193461445
JJ180	vgat	Emx-DG-Ctrl	Emx-DG	SR	44.269494243713666
JJ180	vgat	Emx-DG-Ctrl	Emx-DG	SO	42.3239567651312
JJ181	vgat	Emx-DG-Ctrl	Emx-DG	All	44.00276404429434
JJ181	vgat	Emx-DG-Ctrl	Emx-DG	SP	49.45113685245577
JJ181	vgat	Emx-DG-Ctrl	Emx-DG	SR	42.73585047144315
JJ181	vgat	Emx-DG-Ctrl	Emx-DG	SO	38.26740213553821
JJ182	vgat	Emx-DG-Ctrl	Emx-DG	All	44.49252984800474
JJ182	vgat	Emx-DG-Ctrl	Emx-DG	SP	49.274924398753846
JJ182	vgat	Emx-DG-Ctrl	Emx-DG	SR	42.62259366570685
JJ182	vgat	Emx-DG-Ctrl	Emx-DG	SO	41.174980077974446
JJ342	vgat	Emx-DG-cKO	Emx-DG	All	39.25763476353762
JJ342	vgat	Emx-DG-cKO	Emx-DG	SP	42.10886304059919
JJ342	vgat	Emx-DG-cKO	Emx-DG	SR	39.094922888626414
JJ342	vgat	Emx-DG-cKO	Emx-DG	SO	35.83630230630608
JJ343	vgat	Emx-DG-cKO	Emx-DG	All	40.12240987646954
JJ343	vgat	Emx-DG-cKO	Emx-DG	SP	43.461101037744626
JJ343	vgat	Emx-DG-cKO	Emx-DG	SR	39.0427440009936
JJ343	vgat	Emx-DG-cKO	Emx-DG	SO	36.962513903141044
JJ344	vgat	Emx-DG-cKO	Emx-DG	All	38.39905829882582
JJ344	vgat	Emx-DG-cKO	Emx-DG	SP	40.98586085863202
JJ344	vgat	Emx-DG-cKO	Emx-DG	SR	37.55853871873323
JJ344	vgat	Emx-DG-cKO	Emx-DG	SO	35.707665419950104
JJ345	vgat	Emx-DG-cKO	Emx-DG	All	42.71804687469804
JJ345	vgat	Emx-DG-cKO	Emx-DG	SP	45.94867842016071
JJ345	vgat	Emx-DG-cKO	Emx-DG	SR	40.549697604732465
JJ345	vgat	Emx-DG-cKO	Emx-DG	SO	40.48490022421943
JJ346	vgat	Emx-DG-cKO	Emx-DG	All	41.88563967467994
JJ346	vgat	Emx-DG-cKO	Emx-DG	SP	45.01919635364675
JJ346	vgat	Emx-DG-cKO	Emx-DG	SR	40.377406358012394
JJ346	vgat	Emx-DG-cKO	Emx-DG	SO	39.33920811722126
JJ347	vgat	Emx-DG-cKO	Emx-DG	All	39.30829428265507
JJ347	vgat	Emx-DG-cKO	Emx-DG	SP	42.75728940496509
JJ347	vgat	Emx-DG-cKO	Emx-DG	SR	37.991126926368715
JJ347	vgat	Emx-DG-cKO	Emx-DG	SO	35.59566316762576
JJ348	vgat	Emx-DG-cKO	Emx-DG	All	39.68730509381845
JJ348	vgat	Emx-DG-cKO	Emx-DG	SP	43.55796735206882
JJ348	vgat	Emx-DG-cKO	Emx-DG	SR	38.40600173628787
JJ348	vgat	Emx-DG-cKO	Emx-DG	SO	35.52876771878778
JJ349	vgat	Emx-DG-cKO	Emx-DG	All	38.84967742127834
JJ349	vgat	Emx-DG-cKO	Emx-DG	SP	41.243448742790754
JJ349	vgat	Emx-DG-cKO	Emx-DG	SR	38.50680963514355
JJ349	vgat	Emx-DG-cKO	Emx-DG	SO	35.817043555015346
JJ350	vgat	Emx-DG-cKO	Emx-DG	All	41.33569868837758
JJ350	vgat	Emx-DG-cKO	Emx-DG	SP	43.254982124402275
JJ350	vgat	Emx-DG-cKO	Emx-DG	SR	41.02994872408813
JJ350	vgat	Emx-DG-cKO	Emx-DG	SO	38.307639202158796
JJ351	vgat	Emx-DG-cKO	Emx-DG	All	37.330474852865514
JJ351	vgat	Emx-DG-cKO	Emx-DG	SP	40.760749934904936
JJ351	vgat	Emx-DG-cKO	Emx-DG	SR	36.44235568252329
JJ351	vgat	Emx-DG-cKO	Emx-DG	SO	33.798438857698564
JJ352	vgat	Emx-DG-cKO	Emx-DG	All	39.35277181710663
JJ352	vgat	Emx-DG-cKO	Emx-DG	SP	41.48071255931317
JJ352	vgat	Emx-DG-cKO	Emx-DG	SR	38.584698676427465
JJ352	vgat	Emx-DG-cKO	Emx-DG	SO	37.38473591258287
JJ353	vgat	Emx-DG-cKO	Emx-DG	All	40.316129893138104
JJ353	vgat	Emx-DG-cKO	Emx-DG	SP	43.57863685713551
JJ353	vgat	Emx-DG-cKO	Emx-DG	SR	38.444112414275956
JJ353	vgat	Emx-DG-cKO	Emx-DG	SO	37.64715858012158
JJ354	vgat	Emx-DG-cKO	Emx-DG	All	41.84179333099401
JJ354	vgat	Emx-DG-cKO	Emx-DG	SP	44.20572749159053
JJ354	vgat	Emx-DG-cKO	Emx-DG	SR	39.601203207541126
JJ354	vgat	Emx-DG-cKO	Emx-DG	SO	40.290202901166225
JJ355	vgat	Emx-DG-cKO	Emx-DG	All	40.366243431921326
JJ355	vgat	Emx-DG-cKO	Emx-DG	SP	43.923619936356886
JJ355	vgat	Emx-DG-cKO	Emx-DG	SR	38.78593105836931
JJ355	vgat	Emx-DG-cKO	Emx-DG	SO	36.32435349221667
JJ356	vgat	Emx-DG-cKO	Emx-DG	All	40.856011665435716
JJ356	vgat	Emx-DG-cKO	Emx-DG	SP	43.924759695220445
JJ356	vgat	Emx-DG-cKO	Emx-DG	SR	38.866693311535776
JJ356	vgat	Emx-DG-cKO	Emx-DG	SO	37.97997910268749
JJ357	vgat	Emx-DG-Ctrl	Emx-DG	All	38.29708014362204
JJ357	vgat	Emx-DG-Ctrl	Emx-DG	SP	41.74947364247397
JJ357	vgat	Emx-DG-Ctrl	Emx-DG	SR	37.64682356956957
JJ357	vgat	Emx-DG-Ctrl	Emx-DG	SO	34.65391172623305
JJ358	vgat	Emx-DG-Ctrl	Emx-DG	All	37.746190691599516
JJ358	vgat	Emx-DG-Ctrl	Emx-DG	SP	42.05870533810749
JJ358	vgat	Emx-DG-Ctrl	Emx-DG	SR	36.98983110771664
JJ358	vgat	Emx-DG-Ctrl	Emx-DG	SO	32.36352943093158
JJ359	vgat	Emx-DG-Ctrl	Emx-DG	All	40.195305598403614
JJ359	vgat	Emx-DG-Ctrl	Emx-DG	SP	42.93224601470939
JJ359	vgat	Emx-DG-Ctrl	Emx-DG	SR	39.57203946213906
JJ359	vgat	Emx-DG-Ctrl	Emx-DG	SO	37.45023556925372
JJ360	vgat	Emx-DG-Ctrl	Emx-DG	All	40.226297591021165
JJ360	vgat	Emx-DG-Ctrl	Emx-DG	SP	42.76658969281466
JJ360	vgat	Emx-DG-Ctrl	Emx-DG	SR	39.62909026342164
JJ360	vgat	Emx-DG-Ctrl	Emx-DG	SO	37.28088853231907
JJ361	vgat	Emx-DG-Ctrl	Emx-DG	All	41.00134172636474
JJ361	vgat	Emx-DG-Ctrl	Emx-DG	SP	44.60158233944374
JJ361	vgat	Emx-DG-Ctrl	Emx-DG	SR	38.62444394896678
JJ361	vgat	Emx-DG-Ctrl	Emx-DG	SO	39.02199708823839
JJ362	vgat	Emx-DG-Ctrl	Emx-DG	All	39.71516099709949
JJ362	vgat	Emx-DG-Ctrl	Emx-DG	SP	44.30321691823227
JJ362	vgat	Emx-DG-Ctrl	Emx-DG	SR	37.653071592080316
JJ362	vgat	Emx-DG-Ctrl	Emx-DG	SO	34.96243034430553
JJ363	vgat	Emx-DG-Ctrl	Emx-DG	All	40.82100922997432
JJ363	vgat	Emx-DG-Ctrl	Emx-DG	SP	44.51745042031169
JJ363	vgat	Emx-DG-Ctrl	Emx-DG	SR	38.87787950814503
JJ363	vgat	Emx-DG-Ctrl	Emx-DG	SO	37.56463802367939
JJ364	vgat	Emx-DG-Ctrl	Emx-DG	All	40.2894979036785
JJ364	vgat	Emx-DG-Ctrl	Emx-DG	SP	43.89277299955443
JJ364	vgat	Emx-DG-Ctrl	Emx-DG	SR	39.21066745751072
JJ364	vgat	Emx-DG-Ctrl	Emx-DG	SO	36.22235231029219
JJ366	vgat	Emx-DG-cKO	Emx-DG	All	41.33150013167994
JJ366	vgat	Emx-DG-cKO	Emx-DG	SP	43.50652984556949
JJ366	vgat	Emx-DG-cKO	Emx-DG	SR	39.89856934628342
JJ366	vgat	Emx-DG-cKO	Emx-DG	SO	40.096003575457225
JJ367	vgat	Emx-DG-cKO	Emx-DG	All	40.46035701904616
JJ367	vgat	Emx-DG-cKO	Emx-DG	SP	43.81362078490065
JJ367	vgat	Emx-DG-cKO	Emx-DG	SR	38.357254364858846
JJ367	vgat	Emx-DG-cKO	Emx-DG	SO	37.46966355048497
JJ368	vgat	Emx-DG-cKO	Emx-DG	All	41.38469101184822
JJ368	vgat	Emx-DG-cKO	Emx-DG	SP	44.05991836035464
JJ368	vgat	Emx-DG-cKO	Emx-DG	SR	41.02489968190818
JJ368	vgat	Emx-DG-cKO	Emx-DG	SO	38.59721439900679
JJ369	vgat	Emx-DG-cKO	Emx-DG	All	37.92730433887329
JJ369	vgat	Emx-DG-cKO	Emx-DG	SP	42.5993395777054
JJ369	vgat	Emx-DG-cKO	Emx-DG	SR	35.914879900838265
JJ369	vgat	Emx-DG-cKO	Emx-DG	SO	33.60794470290405
JJ370	vgat	Emx-DG-cKO	Emx-DG	All	41.6526437060818
JJ370	vgat	Emx-DG-cKO	Emx-DG	SP	46.32326188010047
JJ370	vgat	Emx-DG-cKO	Emx-DG	SR	38.96937757482168
JJ370	vgat	Emx-DG-cKO	Emx-DG	SO	38.42788531667417
JJ372	vgat	Emx-DG-cKO	Emx-DG	All	39.29233161946758
JJ372	vgat	Emx-DG-cKO	Emx-DG	SP	43.84442006070714
JJ372	vgat	Emx-DG-cKO	Emx-DG	SR	37.28164375005869
JJ372	vgat	Emx-DG-cKO	Emx-DG	SO	35.255531151688444
JJ373	vgat	Emx-DG-Ctrl	Emx-DG	All	40.72782992808845
JJ373	vgat	Emx-DG-Ctrl	Emx-DG	SP	44.069292059996634
JJ373	vgat	Emx-DG-Ctrl	Emx-DG	SR	40.14742398111164
JJ373	vgat	Emx-DG-Ctrl	Emx-DG	SO	37.97383482653313
JJ374	vgat	Emx-DG-Ctrl	Emx-DG	All	39.98370599530162
JJ374	vgat	Emx-DG-Ctrl	Emx-DG	SP	43.709979482933235
JJ374	vgat	Emx-DG-Ctrl	Emx-DG	SR	37.85612122615179
JJ374	vgat	Emx-DG-Ctrl	Emx-DG	SO	37.46563660551402
JJ376	vgat	Emx-DG-Ctrl	Emx-DG	All	39.3467589627129
JJ376	vgat	Emx-DG-Ctrl	Emx-DG	SP	43.746950811186274
JJ376	vgat	Emx-DG-Ctrl	Emx-DG	SR	36.88126194768448
JJ376	vgat	Emx-DG-Ctrl	Emx-DG	SO	36.06746219819712
JJ377	vgat	Emx-DG-Ctrl	Emx-DG	All	43.42518592282738
JJ377	vgat	Emx-DG-Ctrl	Emx-DG	SP	48.06429552958719
JJ377	vgat	Emx-DG-Ctrl	Emx-DG	SR	41.1577133291507
JJ377	vgat	Emx-DG-Ctrl	Emx-DG	SO	39.554648076033466
JJ378	vgat	Emx-DG-Ctrl	Emx-DG	All	42.59131260107176
JJ378	vgat	Emx-DG-Ctrl	Emx-DG	SP	46.98764078125268
JJ378	vgat	Emx-DG-Ctrl	Emx-DG	SR	41.15505513341977
JJ378	vgat	Emx-DG-Ctrl	Emx-DG	SO	38.748222954944914
JJ379	vgat	Emx-DG-Ctrl	Emx-DG	All	41.62826008173843
JJ379	vgat	Emx-DG-Ctrl	Emx-DG	SP	45.72282196174184
JJ379	vgat	Emx-DG-Ctrl	Emx-DG	SR	39.651424989491765
JJ379	vgat	Emx-DG-Ctrl	Emx-DG	SO	38.73008967525118
JJ381	vgat	Emx-DG-Ctrl	Emx-DG	All	40.120928421346974
JJ381	vgat	Emx-DG-Ctrl	Emx-DG	SP	43.334000645321055
JJ381	vgat	Emx-DG-Ctrl	Emx-DG	SR	38.828869207625864
JJ381	vgat	Emx-DG-Ctrl	Emx-DG	SO	37.767141613708006
JJ382	vgat	Emx-DG-Ctrl	Emx-DG	All	38.51152023635554
JJ382	vgat	Emx-DG-Ctrl	Emx-DG	SP	42.02037457399883
JJ382	vgat	Emx-DG-Ctrl	Emx-DG	SR	37.48353882174436
JJ382	vgat	Emx-DG-Ctrl	Emx-DG	SO	36.253296669262916
JJ383	vgat	Emx-DG-Ctrl	Emx-DG	All	37.71506791100712
JJ383	vgat	Emx-DG-Ctrl	Emx-DG	SP	41.16942998240184
JJ383	vgat	Emx-DG-Ctrl	Emx-DG	SR	36.49384560218523
JJ383	vgat	Emx-DG-Ctrl	Emx-DG	SO	34.418124859163406
JJ384	vgat	Emx-DG-Ctrl	Emx-DG	All	39.47746252971472
JJ384	vgat	Emx-DG-Ctrl	Emx-DG	SP	42.74762079217632
JJ384	vgat	Emx-DG-Ctrl	Emx-DG	SR	38.542853530039146
JJ384	vgat	Emx-DG-Ctrl	Emx-DG	SO	36.452509032596616
JJ385	vgat	Emx-DG-Ctrl	Emx-DG	All	39.3268040380305
JJ385	vgat	Emx-DG-Ctrl	Emx-DG	SP	44.65720914923258
JJ385	vgat	Emx-DG-Ctrl	Emx-DG	SR	37.014066450944256
JJ385	vgat	Emx-DG-Ctrl	Emx-DG	SO	35.44742348424037
JJ386	vgat	Emx-DG-Ctrl	Emx-DG	All	42.130237156442966
JJ386	vgat	Emx-DG-Ctrl	Emx-DG	SP	46.31911520010106
JJ386	vgat	Emx-DG-Ctrl	Emx-DG	SR	39.980867207933706
JJ386	vgat	Emx-DG-Ctrl	Emx-DG	SO	39.095668439931984
JJ387	vgat	Emx-DG-Ctrl	Emx-DG	All	39.0453593629807
JJ387	vgat	Emx-DG-Ctrl	Emx-DG	SP	43.83940850562071
JJ387	vgat	Emx-DG-Ctrl	Emx-DG	SR	37.26357737402665
JJ387	vgat	Emx-DG-Ctrl	Emx-DG	SO	34.968348942670524
JJ388	vgat	Emx-DG-Ctrl	Emx-DG	All	40.74992236241068
JJ388	vgat	Emx-DG-Ctrl	Emx-DG	SP	45.00142917633147
JJ388	vgat	Emx-DG-Ctrl	Emx-DG	SR	39.27213482978442
JJ388	vgat	Emx-DG-Ctrl	Emx-DG	SO	37.38153476117452
JJ025	vgat	Emx-POMT2-cKO	Emx-POMT2	All	59.39990501011037
JJ025	vgat	Emx-POMT2-cKO	Emx-POMT2	SP	65.81771410332773
JJ025	vgat	Emx-POMT2-cKO	Emx-POMT2	SR	51.030433364865985
JJ025	vgat	Emx-POMT2-cKO	Emx-POMT2	SO	54.15034364003833
JJ026	vgat	Emx-POMT2-cKO	Emx-POMT2	All	58.56772734180342
JJ026	vgat	Emx-POMT2-cKO	Emx-POMT2	SP	64.65750664920924
JJ026	vgat	Emx-POMT2-cKO	Emx-POMT2	SR	52.51064523376678
JJ026	vgat	Emx-POMT2-cKO	Emx-POMT2	SO	53.515393119021475
JJ027	vgat	Emx-POMT2-cKO	Emx-POMT2	All	56.87733279020058
JJ027	vgat	Emx-POMT2-cKO	Emx-POMT2	SP	63.2492196903386
JJ027	vgat	Emx-POMT2-cKO	Emx-POMT2	SR	48.77200759201678
JJ027	vgat	Emx-POMT2-cKO	Emx-POMT2	SO	52.200959920203815
JJ028	vgat	Emx-POMT2-cKO	Emx-POMT2	All	56.77161543357853
JJ028	vgat	Emx-POMT2-cKO	Emx-POMT2	SP	61.88829945195592
JJ028	vgat	Emx-POMT2-cKO	Emx-POMT2	SR	49.28220396428755
JJ028	vgat	Emx-POMT2-cKO	Emx-POMT2	SO	53.3044614579964
JJ029	vgat	Emx-POMT2-Ctrl	Emx-POMT2	All	64.61858066102214
JJ029	vgat	Emx-POMT2-Ctrl	Emx-POMT2	SP	68.25392528369316
JJ029	vgat	Emx-POMT2-Ctrl	Emx-POMT2	SR	57.697104727945295
JJ029	vgat	Emx-POMT2-Ctrl	Emx-POMT2	SO	62.20116875261462
JJ030	vgat	Emx-POMT2-Ctrl	Emx-POMT2	All	61.765175943081054
JJ030	vgat	Emx-POMT2-Ctrl	Emx-POMT2	SP	66.26940086558582
JJ030	vgat	Emx-POMT2-Ctrl	Emx-POMT2	SR	55.31613746451768
JJ030	vgat	Emx-POMT2-Ctrl	Emx-POMT2	SO	58.71030018073138
JJ031	vgat	Emx-POMT2-Ctrl	Emx-POMT2	All	59.8075505940032
JJ031	vgat	Emx-POMT2-Ctrl	Emx-POMT2	SP	64.80527133759641
JJ031	vgat	Emx-POMT2-Ctrl	Emx-POMT2	SR	53.194870011491474
JJ031	vgat	Emx-POMT2-Ctrl	Emx-POMT2	SO	55.11328556814392
JJ032	vgat	Emx-POMT2-Ctrl	Emx-POMT2	All	61.57515391460495
JJ032	vgat	Emx-POMT2-Ctrl	Emx-POMT2	SP	67.54394238134525
JJ032	vgat	Emx-POMT2-Ctrl	Emx-POMT2	SR	53.62689955910768
JJ032	vgat	Emx-POMT2-Ctrl	Emx-POMT2	SO	56.860503964897006
JJ033	vgat	Emx-POMT2-cKO	Emx-POMT2	All	49.45992490008245
JJ033	vgat	Emx-POMT2-cKO	Emx-POMT2	SP	56.54412703963193
JJ033	vgat	Emx-POMT2-cKO	Emx-POMT2	SR	47.707290589223476
JJ033	vgat	Emx-POMT2-cKO	Emx-POMT2	SO	42.863068807610674
JJ034	vgat	Emx-POMT2-cKO	Emx-POMT2	All	49.56585074844005
JJ034	vgat	Emx-POMT2-cKO	Emx-POMT2	SP	57.87876099021882
JJ034	vgat	Emx-POMT2-cKO	Emx-POMT2	SR	45.68208799106352
JJ034	vgat	Emx-POMT2-cKO	Emx-POMT2	SO	44.92294219597553
JJ035	vgat	Emx-POMT2-cKO	Emx-POMT2	All	47.82771141005093
JJ035	vgat	Emx-POMT2-cKO	Emx-POMT2	SP	57.5523880182211
JJ035	vgat	Emx-POMT2-cKO	Emx-POMT2	SR	42.23869432620976
JJ035	vgat	Emx-POMT2-cKO	Emx-POMT2	SO	42.19640701997158
JJ036	vgat	Emx-POMT2-cKO	Emx-POMT2	All	55.306297364258214
JJ036	vgat	Emx-POMT2-cKO	Emx-POMT2	SP	62.77716968096653
JJ036	vgat	Emx-POMT2-cKO	Emx-POMT2	SR	52.283718136157816
JJ036	vgat	Emx-POMT2-cKO	Emx-POMT2	SO	49.83324562707971
JJ037	vgat	Emx-POMT2-Ctrl	Emx-POMT2	All	50.42456390562894
JJ037	vgat	Emx-POMT2-Ctrl	Emx-POMT2	SP	60.5624648059292
JJ037	vgat	Emx-POMT2-Ctrl	Emx-POMT2	SR	42.04885794891949
JJ037	vgat	Emx-POMT2-Ctrl	Emx-POMT2	SO	40.49377858173179
JJ038	vgat	Emx-POMT2-Ctrl	Emx-POMT2	All	48.41016386544412
JJ038	vgat	Emx-POMT2-Ctrl	Emx-POMT2	SP	56.82390374048987
JJ038	vgat	Emx-POMT2-Ctrl	Emx-POMT2	SR	40.99532898467509
JJ038	vgat	Emx-POMT2-Ctrl	Emx-POMT2	SO	33.86899862177427
JJ039	vgat	Emx-POMT2-Ctrl	Emx-POMT2	All	57.3389398911306
JJ039	vgat	Emx-POMT2-Ctrl	Emx-POMT2	SP	64.30077374462516
JJ039	vgat	Emx-POMT2-Ctrl	Emx-POMT2	SR	49.80180824887271
JJ039	vgat	Emx-POMT2-Ctrl	Emx-POMT2	SO	54.60822345596262
JJ040	vgat	Emx-POMT2-Ctrl	Emx-POMT2	All	52.24254251512962
JJ040	vgat	Emx-POMT2-Ctrl	Emx-POMT2	SP	60.23575557698273
JJ040	vgat	Emx-POMT2-Ctrl	Emx-POMT2	SR	46.62258798426303
JJ040	vgat	Emx-POMT2-Ctrl	Emx-POMT2	SO	47.072168531658555
JJ041	vgat	Emx-POMT2-Ctrl	Emx-POMT2	All	52.50141396147498
JJ041	vgat	Emx-POMT2-Ctrl	Emx-POMT2	SP	61.30504855710965
JJ041	vgat	Emx-POMT2-Ctrl	Emx-POMT2	SR	46.52371403379856
JJ041	vgat	Emx-POMT2-Ctrl	Emx-POMT2	SO	46.607360578780884
JJ042	vgat	Emx-POMT2-Ctrl	Emx-POMT2	All	49.13215147716462
JJ042	vgat	Emx-POMT2-Ctrl	Emx-POMT2	SP	58.512482248714214
JJ042	vgat	Emx-POMT2-Ctrl	Emx-POMT2	SR	43.899249212780866
JJ042	vgat	Emx-POMT2-Ctrl	Emx-POMT2	SO	43.97068394866557
JJ043	vgat	Emx-POMT2-Ctrl	Emx-POMT2	All	52.32492016753466
JJ043	vgat	Emx-POMT2-Ctrl	Emx-POMT2	SP	61.99281646265967
JJ043	vgat	Emx-POMT2-Ctrl	Emx-POMT2	SR	47.42304168113967
JJ043	vgat	Emx-POMT2-Ctrl	Emx-POMT2	SO	46.715367999255456
JJ044	vgat	Emx-POMT2-Ctrl	Emx-POMT2	All	54.35243563440642
JJ044	vgat	Emx-POMT2-Ctrl	Emx-POMT2	SP	63.868547341923765
JJ044	vgat	Emx-POMT2-Ctrl	Emx-POMT2	SR	49.787508053127915
JJ044	vgat	Emx-POMT2-Ctrl	Emx-POMT2	SO	45.63249596713944
JJ129	vgat	Emx-POMT2-cKO	Emx-POMT2	All	45.39403244698302
JJ129	vgat	Emx-POMT2-cKO	Emx-POMT2	SP	50.42265456041198
JJ129	vgat	Emx-POMT2-cKO	Emx-POMT2	SR	42.34514596202912
JJ129	vgat	Emx-POMT2-cKO	Emx-POMT2	SO	42.02861774840087
JJ130	vgat	Emx-POMT2-cKO	Emx-POMT2	All	47.5879875123336
JJ130	vgat	Emx-POMT2-cKO	Emx-POMT2	SP	52.33126575969971
JJ130	vgat	Emx-POMT2-cKO	Emx-POMT2	SR	44.08862327342899
JJ130	vgat	Emx-POMT2-cKO	Emx-POMT2	SO	44.19279695440589
JJ131	vgat	Emx-POMT2-cKO	Emx-POMT2	All	44.02718740639609
JJ131	vgat	Emx-POMT2-cKO	Emx-POMT2	SP	49.019763717645645
JJ131	vgat	Emx-POMT2-cKO	Emx-POMT2	SR	41.121485286358215
JJ131	vgat	Emx-POMT2-cKO	Emx-POMT2	SO	39.63732167023567
JJ132	vgat	Emx-POMT2-cKO	Emx-POMT2	All	43.77919243997749
JJ132	vgat	Emx-POMT2-cKO	Emx-POMT2	SP	48.878107860879865
JJ132	vgat	Emx-POMT2-cKO	Emx-POMT2	SR	40.51235131136197
JJ132	vgat	Emx-POMT2-cKO	Emx-POMT2	SO	40.01258494644334
JJ133	vgat	Emx-POMT2-Ctrl	Emx-POMT2	All	46.83611595080584
JJ133	vgat	Emx-POMT2-Ctrl	Emx-POMT2	SP	51.957662664284044
JJ133	vgat	Emx-POMT2-Ctrl	Emx-POMT2	SR	42.84812472437732
JJ133	vgat	Emx-POMT2-Ctrl	Emx-POMT2	SO	43.32466106723901
JJ134	vgat	Emx-POMT2-Ctrl	Emx-POMT2	All	46.782674814424986
JJ134	vgat	Emx-POMT2-Ctrl	Emx-POMT2	SP	51.655795592419224
JJ134	vgat	Emx-POMT2-Ctrl	Emx-POMT2	SR	43.23884467892101
JJ134	vgat	Emx-POMT2-Ctrl	Emx-POMT2	SO	43.17875008876206
JJ135	vgat	Emx-POMT2-Ctrl	Emx-POMT2	All	45.875387483447234
JJ135	vgat	Emx-POMT2-Ctrl	Emx-POMT2	SP	50.61920812791967
JJ135	vgat	Emx-POMT2-Ctrl	Emx-POMT2	SR	42.8148693644728
JJ135	vgat	Emx-POMT2-Ctrl	Emx-POMT2	SO	42.35775669244527
JJ136	vgat	Emx-POMT2-Ctrl	Emx-POMT2	All	45.86614980424046
JJ136	vgat	Emx-POMT2-Ctrl	Emx-POMT2	SP	50.064970020185505
JJ136	vgat	Emx-POMT2-Ctrl	Emx-POMT2	SR	41.82099598099605
JJ136	vgat	Emx-POMT2-Ctrl	Emx-POMT2	SO	43.615405871005066
JJ137	vgat	Emx-POMT2-cKO	Emx-POMT2	All	43.340187241465536
JJ137	vgat	Emx-POMT2-cKO	Emx-POMT2	SP	46.937985070574726
JJ137	vgat	Emx-POMT2-cKO	Emx-POMT2	SR	42.510094671115404
JJ137	vgat	Emx-POMT2-cKO	Emx-POMT2	SO	39.1886591476909
JJ138	vgat	Emx-POMT2-cKO	Emx-POMT2	All	44.02976673903474
JJ138	vgat	Emx-POMT2-cKO	Emx-POMT2	SP	46.52741240744097
JJ138	vgat	Emx-POMT2-cKO	Emx-POMT2	SR	43.543218943622726
JJ138	vgat	Emx-POMT2-cKO	Emx-POMT2	SO	41.04179748380974
JJ139	vgat	Emx-POMT2-cKO	Emx-POMT2	All	43.192827331420695
JJ139	vgat	Emx-POMT2-cKO	Emx-POMT2	SP	45.90352384714077
JJ139	vgat	Emx-POMT2-cKO	Emx-POMT2	SR	42.83640136615942
JJ139	vgat	Emx-POMT2-cKO	Emx-POMT2	SO	39.14818474377724
JJ140	vgat	Emx-POMT2-cKO	Emx-POMT2	All	41.24587931085703
JJ140	vgat	Emx-POMT2-cKO	Emx-POMT2	SP	44.482169921191876
JJ140	vgat	Emx-POMT2-cKO	Emx-POMT2	SR	41.31904747707292
JJ140	vgat	Emx-POMT2-cKO	Emx-POMT2	SO	37.458794814263
JJ141	vgat	Emx-POMT2-Ctrl	Emx-POMT2	All	46.876472595043396
JJ141	vgat	Emx-POMT2-Ctrl	Emx-POMT2	SP	51.08332491496379
JJ141	vgat	Emx-POMT2-Ctrl	Emx-POMT2	SR	44.49592666326798
JJ141	vgat	Emx-POMT2-Ctrl	Emx-POMT2	SO	43.00771686011914
JJ142	vgat	Emx-POMT2-Ctrl	Emx-POMT2	All	43.09111404157456
JJ142	vgat	Emx-POMT2-Ctrl	Emx-POMT2	SP	48.191330379546194
JJ142	vgat	Emx-POMT2-Ctrl	Emx-POMT2	SR	40.566991034232295
JJ142	vgat	Emx-POMT2-Ctrl	Emx-POMT2	SO	38.787796574287995
JJ143	vgat	Emx-POMT2-Ctrl	Emx-POMT2	All	44.68922726696869
JJ143	vgat	Emx-POMT2-Ctrl	Emx-POMT2	SP	50.89549150490267
JJ143	vgat	Emx-POMT2-Ctrl	Emx-POMT2	SR	41.098550671409654
JJ143	vgat	Emx-POMT2-Ctrl	Emx-POMT2	SO	38.16084358398717
JJ144	vgat	Emx-POMT2-Ctrl	Emx-POMT2	All	44.533048313554
JJ144	vgat	Emx-POMT2-Ctrl	Emx-POMT2	SP	50.27877105910516
JJ144	vgat	Emx-POMT2-Ctrl	Emx-POMT2	SR	41.6717287190645
JJ144	vgat	Emx-POMT2-Ctrl	Emx-POMT2	SO	39.03089746559085
JJ183	vgat	Emx-POMT2-cKO	Emx-POMT2	All	43.50395729399414
JJ183	vgat	Emx-POMT2-cKO	Emx-POMT2	SP	46.64965616859585
JJ183	vgat	Emx-POMT2-cKO	Emx-POMT2	SR	42.23584550765894
JJ183	vgat	Emx-POMT2-cKO	Emx-POMT2	SO	41.30062530661094
JJ184	vgat	Emx-POMT2-cKO	Emx-POMT2	All	42.34732569449406
JJ184	vgat	Emx-POMT2-cKO	Emx-POMT2	SP	46.17794712728756
JJ184	vgat	Emx-POMT2-cKO	Emx-POMT2	SR	39.9687047041827
JJ184	vgat	Emx-POMT2-cKO	Emx-POMT2	SO	40.683137129879654
JJ185	vgat	Emx-POMT2-cKO	Emx-POMT2	All	41.684105016940435
JJ185	vgat	Emx-POMT2-cKO	Emx-POMT2	SP	45.97481057540029
JJ185	vgat	Emx-POMT2-cKO	Emx-POMT2	SR	41.33482966291853
JJ185	vgat	Emx-POMT2-cKO	Emx-POMT2	SO	37.092289670833374
JJ186	vgat	Emx-POMT2-cKO	Emx-POMT2	All	42.109239939155415
JJ186	vgat	Emx-POMT2-cKO	Emx-POMT2	SP	47.0116349290645
JJ186	vgat	Emx-POMT2-cKO	Emx-POMT2	SR	41.17678685433458
JJ186	vgat	Emx-POMT2-cKO	Emx-POMT2	SO	38.14730659054034
JJ187	vgat	Emx-POMT2-cKO	Emx-POMT2	All	45.07018822487625
JJ187	vgat	Emx-POMT2-cKO	Emx-POMT2	SP	50.08302204670269
JJ187	vgat	Emx-POMT2-cKO	Emx-POMT2	SR	41.918627813585246
JJ187	vgat	Emx-POMT2-cKO	Emx-POMT2	SO	42.52337660414245
JJ188	vgat	Emx-POMT2-cKO	Emx-POMT2	All	47.90769553759711
JJ188	vgat	Emx-POMT2-cKO	Emx-POMT2	SP	52.34447736278384
JJ188	vgat	Emx-POMT2-cKO	Emx-POMT2	SR	45.74906410286165
JJ188	vgat	Emx-POMT2-cKO	Emx-POMT2	SO	44.93929427226378
JJ189	vgat	Emx-POMT2-cKO	Emx-POMT2	All	46.6953522133577
JJ189	vgat	Emx-POMT2-cKO	Emx-POMT2	SP	49.731233629339755
JJ189	vgat	Emx-POMT2-cKO	Emx-POMT2	SR	45.21400916803277
JJ189	vgat	Emx-POMT2-cKO	Emx-POMT2	SO	44.44786943439432
JJ190	vgat	Emx-POMT2-cKO	Emx-POMT2	All	46.69070681542888
JJ190	vgat	Emx-POMT2-cKO	Emx-POMT2	SP	51.00766959386864
JJ190	vgat	Emx-POMT2-cKO	Emx-POMT2	SR	44.41664390149568
JJ190	vgat	Emx-POMT2-cKO	Emx-POMT2	SO	43.877949297246744
JJ191	vgat	Emx-POMT2-Ctrl	Emx-POMT2	All	45.06380702690321
JJ191	vgat	Emx-POMT2-Ctrl	Emx-POMT2	SP	48.770978756457794
JJ191	vgat	Emx-POMT2-Ctrl	Emx-POMT2	SR	43.44199458772961
JJ191	vgat	Emx-POMT2-Ctrl	Emx-POMT2	SO	41.502475165110724
JJ192	vgat	Emx-POMT2-Ctrl	Emx-POMT2	All	46.40061958676807
JJ192	vgat	Emx-POMT2-Ctrl	Emx-POMT2	SP	50.5372010247697
JJ192	vgat	Emx-POMT2-Ctrl	Emx-POMT2	SR	44.91451880342101
JJ192	vgat	Emx-POMT2-Ctrl	Emx-POMT2	SO	41.450426757850636
JJ193	vgat	Emx-POMT2-Ctrl	Emx-POMT2	All	43.31238241999693
JJ193	vgat	Emx-POMT2-Ctrl	Emx-POMT2	SP	47.42151158421923
JJ193	vgat	Emx-POMT2-Ctrl	Emx-POMT2	SR	41.798070340163434
JJ193	vgat	Emx-POMT2-Ctrl	Emx-POMT2	SO	39.35307600751924
JJ194	vgat	Emx-POMT2-Ctrl	Emx-POMT2	All	42.27889770171769
JJ194	vgat	Emx-POMT2-Ctrl	Emx-POMT2	SP	46.474090875882126
JJ194	vgat	Emx-POMT2-Ctrl	Emx-POMT2	SR	40.84133481798387
JJ194	vgat	Emx-POMT2-Ctrl	Emx-POMT2	SO	36.732559821928604
JJ195	vgat	Emx-POMT2-Ctrl	Emx-POMT2	All	47.90146004692119
JJ195	vgat	Emx-POMT2-Ctrl	Emx-POMT2	SP	52.058822050255195
JJ195	vgat	Emx-POMT2-Ctrl	Emx-POMT2	SR	45.20287791802074
JJ195	vgat	Emx-POMT2-Ctrl	Emx-POMT2	SO	44.44104208415634
JJ196	vgat	Emx-POMT2-Ctrl	Emx-POMT2	All	50.00745240726041
JJ196	vgat	Emx-POMT2-Ctrl	Emx-POMT2	SP	53.67700681465427
JJ196	vgat	Emx-POMT2-Ctrl	Emx-POMT2	SR	48.050892814299395
JJ196	vgat	Emx-POMT2-Ctrl	Emx-POMT2	SO	46.54337081452479
JJ197	vgat	Emx-POMT2-Ctrl	Emx-POMT2	All	49.17101356265539
JJ197	vgat	Emx-POMT2-Ctrl	Emx-POMT2	SP	52.24913287256206
JJ197	vgat	Emx-POMT2-Ctrl	Emx-POMT2	SR	46.432910245604624
JJ197	vgat	Emx-POMT2-Ctrl	Emx-POMT2	SO	47.261509407056806
JJ198	vgat	Emx-POMT2-Ctrl	Emx-POMT2	All	48.16482976254113
JJ198	vgat	Emx-POMT2-Ctrl	Emx-POMT2	SP	51.85941757244455
JJ198	vgat	Emx-POMT2-Ctrl	Emx-POMT2	SR	45.5916174998664
JJ198	vgat	Emx-POMT2-Ctrl	Emx-POMT2	SO	45.45262650531746
JJ199	vgat	Emx-POMT2-Ctrl	Emx-POMT2	All	45.61807700591507
JJ199	vgat	Emx-POMT2-Ctrl	Emx-POMT2	SP	48.22878587062126
JJ199	vgat	Emx-POMT2-Ctrl	Emx-POMT2	SR	44.04414925704105
JJ199	vgat	Emx-POMT2-Ctrl	Emx-POMT2	SO	43.734145593363145
JJ200	vgat	Emx-POMT2-Ctrl	Emx-POMT2	All	41.58014882546477
JJ200	vgat	Emx-POMT2-Ctrl	Emx-POMT2	SP	46.54204839552918
JJ200	vgat	Emx-POMT2-Ctrl	Emx-POMT2	SR	39.30400351996362
JJ200	vgat	Emx-POMT2-Ctrl	Emx-POMT2	SO	37.86532132539679
JJ201	vgat	Emx-POMT2-Ctrl	Emx-POMT2	All	45.124855998561735
JJ201	vgat	Emx-POMT2-Ctrl	Emx-POMT2	SP	52.85500443267039
JJ201	vgat	Emx-POMT2-Ctrl	Emx-POMT2	SR	40.61459471242326
JJ201	vgat	Emx-POMT2-Ctrl	Emx-POMT2	SO	36.26812423322255
JJ202	vgat	Emx-POMT2-Ctrl	Emx-POMT2	All	43.330406621163135
JJ202	vgat	Emx-POMT2-Ctrl	Emx-POMT2	SP	49.05887950730903
JJ202	vgat	Emx-POMT2-Ctrl	Emx-POMT2	SR	40.542556662907
JJ202	vgat	Emx-POMT2-Ctrl	Emx-POMT2	SO	36.626571353944044
JJ203	vgat	Emx-POMT2-Ctrl	Emx-POMT2	All	46.351721345709336
JJ203	vgat	Emx-POMT2-Ctrl	Emx-POMT2	SP	50.39883128386496
JJ203	vgat	Emx-POMT2-Ctrl	Emx-POMT2	SR	44.43736260036724
JJ203	vgat	Emx-POMT2-Ctrl	Emx-POMT2	SO	42.95079351414015
JJ204	vgat	Emx-POMT2-Ctrl	Emx-POMT2	All	50.46952827384721
JJ204	vgat	Emx-POMT2-Ctrl	Emx-POMT2	SP	53.55754188286033
JJ204	vgat	Emx-POMT2-Ctrl	Emx-POMT2	SR	48.865144622280624
JJ204	vgat	Emx-POMT2-Ctrl	Emx-POMT2	SO	47.282936985573855
JJ205	vgat	Emx-POMT2-Ctrl	Emx-POMT2	All	45.9873620120819
JJ205	vgat	Emx-POMT2-Ctrl	Emx-POMT2	SP	50.14697120968588
JJ205	vgat	Emx-POMT2-Ctrl	Emx-POMT2	SR	43.57185139839927
JJ205	vgat	Emx-POMT2-Ctrl	Emx-POMT2	SO	42.58177541262232
JJ206	vgat	Emx-POMT2-Ctrl	Emx-POMT2	All	45.638966687169194
JJ206	vgat	Emx-POMT2-Ctrl	Emx-POMT2	SP	49.70238395372018
JJ206	vgat	Emx-POMT2-Ctrl	Emx-POMT2	SR	43.2468857321826
JJ206	vgat	Emx-POMT2-Ctrl	Emx-POMT2	SO	41.98166738027787
JJ053	vgat	B4GAT1-Mutant	B4GAT1	All	51.678754122623694
JJ053	vgat	B4GAT1-Mutant	B4GAT1	SP	61.44877391418613
JJ053	vgat	B4GAT1-Mutant	B4GAT1	SR	43.98934317128898
JJ053	vgat	B4GAT1-Mutant	B4GAT1	SO	42.650803634688394
JJ054	vgat	B4GAT1-Mutant	B4GAT1	All	51.70166949668744
JJ054	vgat	B4GAT1-Mutant	B4GAT1	SP	60.25919539654619
JJ054	vgat	B4GAT1-Mutant	B4GAT1	SR	44.630996415835696
JJ054	vgat	B4GAT1-Mutant	B4GAT1	SO	47.28065360784446
JJ055	vgat	B4GAT1-Mutant	B4GAT1	All	44.14902726966724
JJ055	vgat	B4GAT1-Mutant	B4GAT1	SP	54.23762522023589
JJ055	vgat	B4GAT1-Mutant	B4GAT1	SR	34.64090367814705
JJ055	vgat	B4GAT1-Mutant	B4GAT1	SO	33.38700126703131
JJ056	vgat	B4GAT1-Mutant	B4GAT1	All	33.2581641061275
JJ056	vgat	B4GAT1-Mutant	B4GAT1	SP	38.53538152789931
JJ056	vgat	B4GAT1-Mutant	B4GAT1	SR	30.700731740495364
JJ056	vgat	B4GAT1-Mutant	B4GAT1	SO	28.7850125700425
JJ057	vgat	B4GAT1-Ctrl	B4GAT1	All	51.75907201766549
JJ057	vgat	B4GAT1-Ctrl	B4GAT1	SP	62.01812500053022
JJ057	vgat	B4GAT1-Ctrl	B4GAT1	SR	43.82184874316753
JJ057	vgat	B4GAT1-Ctrl	B4GAT1	SO	44.314678995653495
JJ058	vgat	B4GAT1-Ctrl	B4GAT1	All	53.912232331500384
JJ058	vgat	B4GAT1-Ctrl	B4GAT1	SP	64.00725763307402
JJ058	vgat	B4GAT1-Ctrl	B4GAT1	SR	47.32628113060812
JJ058	vgat	B4GAT1-Ctrl	B4GAT1	SO	45.5990024519704
JJ059	vgat	B4GAT1-Ctrl	B4GAT1	All	53.619475870995
JJ059	vgat	B4GAT1-Ctrl	B4GAT1	SP	64.7067873935022
JJ059	vgat	B4GAT1-Ctrl	B4GAT1	SR	45.990692257438646
JJ059	vgat	B4GAT1-Ctrl	B4GAT1	SO	45.424086067265044
JJ060	vgat	B4GAT1-Ctrl	B4GAT1	All	53.267294291189096
JJ060	vgat	B4GAT1-Ctrl	B4GAT1	SP	64.68622596313702
JJ060	vgat	B4GAT1-Ctrl	B4GAT1	SR	45.47413763735957
JJ060	vgat	B4GAT1-Ctrl	B4GAT1	SO	44.378862436067074
JJ061	vgat	B4GAT1-Mutant	B4GAT1	All	37.36710414321397
JJ061	vgat	B4GAT1-Mutant	B4GAT1	SP	40.935294714323824
JJ061	vgat	B4GAT1-Mutant	B4GAT1	SR	36.674573860927644
JJ061	vgat	B4GAT1-Mutant	B4GAT1	SO	31.756243795993527
JJ062	vgat	B4GAT1-Mutant	B4GAT1	All	40.826767090092886
JJ062	vgat	B4GAT1-Mutant	B4GAT1	SP	45.09938312606655
JJ062	vgat	B4GAT1-Mutant	B4GAT1	SR	39.859483711776406
JJ062	vgat	B4GAT1-Mutant	B4GAT1	SO	33.84814170834016
JJ063	vgat	B4GAT1-Mutant	B4GAT1	All	38.123800880193095
JJ063	vgat	B4GAT1-Mutant	B4GAT1	SP	45.23609514318144
JJ063	vgat	B4GAT1-Mutant	B4GAT1	SR	33.859632084271404
JJ063	vgat	B4GAT1-Mutant	B4GAT1	SO	31.202527945544478
JJ064	vgat	B4GAT1-Mutant	B4GAT1	All	38.095497257923576
JJ064	vgat	B4GAT1-Mutant	B4GAT1	SP	45.69317907142601
JJ064	vgat	B4GAT1-Mutant	B4GAT1	SR	34.44525706970425
JJ064	vgat	B4GAT1-Mutant	B4GAT1	SO	29.57610471349328
JJ065	vgat	B4GAT1-Ctrl	B4GAT1	All	36.04235214120405
JJ065	vgat	B4GAT1-Ctrl	B4GAT1	SP	43.038829054989996
JJ065	vgat	B4GAT1-Ctrl	B4GAT1	SR	32.512859661111705
JJ065	vgat	B4GAT1-Ctrl	B4GAT1	SO	27.363215556139426
JJ066	vgat	B4GAT1-Ctrl	B4GAT1	All	39.30986079799524
JJ066	vgat	B4GAT1-Ctrl	B4GAT1	SP	45.321880235946665
JJ066	vgat	B4GAT1-Ctrl	B4GAT1	SR	37.68810049411388
JJ066	vgat	B4GAT1-Ctrl	B4GAT1	SO	32.52310739499433
JJ067	vgat	B4GAT1-Ctrl	B4GAT1	All	34.49241144044153
JJ067	vgat	B4GAT1-Ctrl	B4GAT1	SP	43.93319556758678
JJ067	vgat	B4GAT1-Ctrl	B4GAT1	SR	28.104580940495776
JJ067	vgat	B4GAT1-Ctrl	B4GAT1	SO	24.136967297126173
JJ068	vgat	B4GAT1-Ctrl	B4GAT1	All	36.969125604121544
JJ068	vgat	B4GAT1-Ctrl	B4GAT1	SP	46.35124028581056
JJ068	vgat	B4GAT1-Ctrl	B4GAT1	SR	30.320280734159063
JJ068	vgat	B4GAT1-Ctrl	B4GAT1	SO	28.56397291540437
JJ069	vgat	B4GAT1-Mutant	B4GAT1	All	42.41902078670171
JJ069	vgat	B4GAT1-Mutant	B4GAT1	SP	48.43332032728074
JJ069	vgat	B4GAT1-Mutant	B4GAT1	SR	38.1675555416512
JJ069	vgat	B4GAT1-Mutant	B4GAT1	SO	38.2995010721762
JJ070	vgat	B4GAT1-Mutant	B4GAT1	All	43.63518968044895
JJ070	vgat	B4GAT1-Mutant	B4GAT1	SP	48.650903292346015
JJ070	vgat	B4GAT1-Mutant	B4GAT1	SR	39.83304652575191
JJ070	vgat	B4GAT1-Mutant	B4GAT1	SO	40.47419228794726
JJ071	vgat	B4GAT1-Mutant	B4GAT1	All	41.2690480009275
JJ071	vgat	B4GAT1-Mutant	B4GAT1	SP	48.37183831693402
JJ071	vgat	B4GAT1-Mutant	B4GAT1	SR	39.524741309588364
JJ071	vgat	B4GAT1-Mutant	B4GAT1	SO	33.30812347964749
JJ072	vgat	B4GAT1-Mutant	B4GAT1	All	43.88028417760992
JJ072	vgat	B4GAT1-Mutant	B4GAT1	SP	48.54206046278659
JJ072	vgat	B4GAT1-Mutant	B4GAT1	SR	41.79287392674178
JJ072	vgat	B4GAT1-Mutant	B4GAT1	SO	39.746919411441915
JJ073	vgat	B4GAT1-Mutant	B4GAT1	All	42.722451681953785
JJ073	vgat	B4GAT1-Mutant	B4GAT1	SP	47.58129985113488
JJ073	vgat	B4GAT1-Mutant	B4GAT1	SR	39.69476582470251
JJ073	vgat	B4GAT1-Mutant	B4GAT1	SO	39.45805291098022
JJ074	vgat	B4GAT1-Mutant	B4GAT1	All	42.13906409497728
JJ074	vgat	B4GAT1-Mutant	B4GAT1	SP	47.25654132220766
JJ074	vgat	B4GAT1-Mutant	B4GAT1	SR	37.90345677916863
JJ074	vgat	B4GAT1-Mutant	B4GAT1	SO	38.89693720680785
JJ075	vgat	B4GAT1-Mutant	B4GAT1	All	36.806355208148645
JJ075	vgat	B4GAT1-Mutant	B4GAT1	SP	44.69798577498628
JJ075	vgat	B4GAT1-Mutant	B4GAT1	SR	31.753658338123827
JJ075	vgat	B4GAT1-Mutant	B4GAT1	SO	28.43438733605192
JJ076	vgat	B4GAT1-Mutant	B4GAT1	All	38.2098541271318
JJ076	vgat	B4GAT1-Mutant	B4GAT1	SP	45.07570933164094
JJ076	vgat	B4GAT1-Mutant	B4GAT1	SR	33.811685125150476
JJ076	vgat	B4GAT1-Mutant	B4GAT1	SO	33.26139363794742
JJ077	vgat	B4GAT1-Mutant	B4GAT1	All	38.66570172272133
JJ077	vgat	B4GAT1-Mutant	B4GAT1	SP	44.61703325253978
JJ077	vgat	B4GAT1-Mutant	B4GAT1	SR	33.78928006685117
JJ077	vgat	B4GAT1-Mutant	B4GAT1	SO	34.66898388463019
JJ078	vgat	B4GAT1-Mutant	B4GAT1	All	38.468750496854724
JJ078	vgat	B4GAT1-Mutant	B4GAT1	SP	43.782792393986284
JJ078	vgat	B4GAT1-Mutant	B4GAT1	SR	33.88242421095295
JJ078	vgat	B4GAT1-Mutant	B4GAT1	SO	33.459563386898736
JJ079	vgat	B4GAT1-Mutant	B4GAT1	All	35.8317348470596
JJ079	vgat	B4GAT1-Mutant	B4GAT1	SP	41.66491523747822
JJ079	vgat	B4GAT1-Mutant	B4GAT1	SR	30.282692146312026
JJ079	vgat	B4GAT1-Mutant	B4GAT1	SO	31.78583558521244
JJ080	vgat	B4GAT1-Mutant	B4GAT1	All	38.045039271376986
JJ080	vgat	B4GAT1-Mutant	B4GAT1	SP	43.47675109572453
JJ080	vgat	B4GAT1-Mutant	B4GAT1	SR	34.76806726261534
JJ080	vgat	B4GAT1-Mutant	B4GAT1	SO	32.80195237513712
JJ081	vgat	B4GAT1-Mutant	B4GAT1	All	41.67528543835439
JJ081	vgat	B4GAT1-Mutant	B4GAT1	SP	48.494268749529354
JJ081	vgat	B4GAT1-Mutant	B4GAT1	SR	38.29242476416892
JJ081	vgat	B4GAT1-Mutant	B4GAT1	SO	33.869626282892305
JJ082	vgat	B4GAT1-Mutant	B4GAT1	All	41.51040073892796
JJ082	vgat	B4GAT1-Mutant	B4GAT1	SP	48.27822156099324
JJ082	vgat	B4GAT1-Mutant	B4GAT1	SR	38.194441633203795
JJ082	vgat	B4GAT1-Mutant	B4GAT1	SO	35.8569189331259
JJ083	vgat	B4GAT1-Mutant	B4GAT1	All	42.97017952002565
JJ083	vgat	B4GAT1-Mutant	B4GAT1	SP	50.25838302936869
JJ083	vgat	B4GAT1-Mutant	B4GAT1	SR	37.832580799207506
JJ083	vgat	B4GAT1-Mutant	B4GAT1	SO	35.76793531822238
JJ084	vgat	B4GAT1-Mutant	B4GAT1	All	41.60726330533047
JJ084	vgat	B4GAT1-Mutant	B4GAT1	SP	46.8130551873615
JJ084	vgat	B4GAT1-Mutant	B4GAT1	SR	37.50886546981171
JJ084	vgat	B4GAT1-Mutant	B4GAT1	SO	38.71444951883531
JJ085	vgat	B4GAT1-Mutant	B4GAT1	All	44.915527240748645
JJ085	vgat	B4GAT1-Mutant	B4GAT1	SP	50.38500841316129
JJ085	vgat	B4GAT1-Mutant	B4GAT1	SR	42.26142599519535
JJ085	vgat	B4GAT1-Mutant	B4GAT1	SO	39.46689253248458
JJ086	vgat	B4GAT1-Mutant	B4GAT1	All	44.204514550255475
JJ086	vgat	B4GAT1-Mutant	B4GAT1	SP	49.525436180857504
JJ086	vgat	B4GAT1-Mutant	B4GAT1	SR	41.002679325360006
JJ086	vgat	B4GAT1-Mutant	B4GAT1	SO	40.94835790964713
JJ087	vgat	B4GAT1-Mutant	B4GAT1	All	41.980332877868896
JJ087	vgat	B4GAT1-Mutant	B4GAT1	SP	47.981186447387174
JJ087	vgat	B4GAT1-Mutant	B4GAT1	SR	38.371899599013055
JJ087	vgat	B4GAT1-Mutant	B4GAT1	SO	36.942011432218735
JJ088	vgat	B4GAT1-Mutant	B4GAT1	All	41.50949894382237
JJ088	vgat	B4GAT1-Mutant	B4GAT1	SP	47.14438477097255
JJ088	vgat	B4GAT1-Mutant	B4GAT1	SR	38.76041617432031
JJ088	vgat	B4GAT1-Mutant	B4GAT1	SO	37.09195713936984
JJ089	vgat	B4GAT1-Mutant	B4GAT1	All	47.01722484255594
JJ089	vgat	B4GAT1-Mutant	B4GAT1	SP	50.71517740661262
JJ089	vgat	B4GAT1-Mutant	B4GAT1	SR	44.98461899212967
JJ089	vgat	B4GAT1-Mutant	B4GAT1	SO	44.87541118715925
JJ090	vgat	B4GAT1-Mutant	B4GAT1	All	46.526762879641105
JJ090	vgat	B4GAT1-Mutant	B4GAT1	SP	49.52219827054758
JJ090	vgat	B4GAT1-Mutant	B4GAT1	SR	44.318916812567664
JJ090	vgat	B4GAT1-Mutant	B4GAT1	SO	45.23521203237755
JJ091	vgat	B4GAT1-Mutant	B4GAT1	All	44.03496383497069
JJ091	vgat	B4GAT1-Mutant	B4GAT1	SP	48.58391081779074
JJ091	vgat	B4GAT1-Mutant	B4GAT1	SR	40.36449574783274
JJ091	vgat	B4GAT1-Mutant	B4GAT1	SO	42.096106611371546
JJ092	vgat	B4GAT1-Mutant	B4GAT1	All	47.29686925794985
JJ092	vgat	B4GAT1-Mutant	B4GAT1	SP	50.89794199188348
JJ092	vgat	B4GAT1-Mutant	B4GAT1	SR	44.22277791933368
JJ092	vgat	B4GAT1-Mutant	B4GAT1	SO	46.06287561480641
JJ093	vgat	B4GAT1-Ctrl	B4GAT1	All	43.9299840794746
JJ093	vgat	B4GAT1-Ctrl	B4GAT1	SP	49.28455975255752
JJ093	vgat	B4GAT1-Ctrl	B4GAT1	SR	41.4945717808967
JJ093	vgat	B4GAT1-Ctrl	B4GAT1	SO	39.29204533678066
JJ094	vgat	B4GAT1-Ctrl	B4GAT1	All	45.979959140088006
JJ094	vgat	B4GAT1-Ctrl	B4GAT1	SP	50.59752567630115
JJ094	vgat	B4GAT1-Ctrl	B4GAT1	SR	43.60223375046329
JJ094	vgat	B4GAT1-Ctrl	B4GAT1	SO	41.908871565601665
JJ095	vgat	B4GAT1-Ctrl	B4GAT1	All	42.586534594472255
JJ095	vgat	B4GAT1-Ctrl	B4GAT1	SP	49.1237858418575
JJ095	vgat	B4GAT1-Ctrl	B4GAT1	SR	39.58810317297189
JJ095	vgat	B4GAT1-Ctrl	B4GAT1	SO	36.260414346745776
JJ096	vgat	B4GAT1-Ctrl	B4GAT1	All	43.21532067362586
JJ096	vgat	B4GAT1-Ctrl	B4GAT1	SP	48.91994421612499
JJ096	vgat	B4GAT1-Ctrl	B4GAT1	SR	40.30324180096303
JJ096	vgat	B4GAT1-Ctrl	B4GAT1	SO	38.16465962991364
JJ097	vgat	B4GAT1-Ctrl	B4GAT1	All	43.86537956456372
JJ097	vgat	B4GAT1-Ctrl	B4GAT1	SP	47.56721616250433
JJ097	vgat	B4GAT1-Ctrl	B4GAT1	SR	42.05333256742214
JJ097	vgat	B4GAT1-Ctrl	B4GAT1	SO	41.58232518087256
JJ098	vgat	B4GAT1-Ctrl	B4GAT1	All	45.347420931083775
JJ098	vgat	B4GAT1-Ctrl	B4GAT1	SP	48.92838928970447
JJ098	vgat	B4GAT1-Ctrl	B4GAT1	SR	43.09830347883036
JJ098	vgat	B4GAT1-Ctrl	B4GAT1	SO	43.37694658092804
JJ099	vgat	B4GAT1-Ctrl	B4GAT1	All	41.646264166589084
JJ099	vgat	B4GAT1-Ctrl	B4GAT1	SP	47.5052727738654
JJ099	vgat	B4GAT1-Ctrl	B4GAT1	SR	40.425425116995484
JJ099	vgat	B4GAT1-Ctrl	B4GAT1	SO	34.75339392121518
JJ100	vgat	B4GAT1-Ctrl	B4GAT1	All	42.11124287863311
JJ100	vgat	B4GAT1-Ctrl	B4GAT1	SP	47.889850369196985
JJ100	vgat	B4GAT1-Ctrl	B4GAT1	SR	39.11042837759036
JJ100	vgat	B4GAT1-Ctrl	B4GAT1	SO	37.46452017909975
JJ101	vgat	B4GAT1-Ctrl	B4GAT1	All	46.09857100554554
JJ101	vgat	B4GAT1-Ctrl	B4GAT1	SP	50.85599697325141
JJ101	vgat	B4GAT1-Ctrl	B4GAT1	SR	43.86507759417901
JJ101	vgat	B4GAT1-Ctrl	B4GAT1	SO	41.92433098839013
JJ102	vgat	B4GAT1-Ctrl	B4GAT1	All	46.62902813709233
JJ102	vgat	B4GAT1-Ctrl	B4GAT1	SP	51.32893209676807
JJ102	vgat	B4GAT1-Ctrl	B4GAT1	SR	44.2626960320002
JJ102	vgat	B4GAT1-Ctrl	B4GAT1	SO	43.05086477913585
JJ103	vgat	B4GAT1-Ctrl	B4GAT1	All	41.48369020098695
JJ103	vgat	B4GAT1-Ctrl	B4GAT1	SP	48.214519969509794
JJ103	vgat	B4GAT1-Ctrl	B4GAT1	SR	38.497558818291715
JJ103	vgat	B4GAT1-Ctrl	B4GAT1	SO	36.47834325809783
JJ104	vgat	B4GAT1-Ctrl	B4GAT1	All	42.67776194638286
JJ104	vgat	B4GAT1-Ctrl	B4GAT1	SP	48.42630346541164
JJ104	vgat	B4GAT1-Ctrl	B4GAT1	SR	39.70364081650476
JJ104	vgat	B4GAT1-Ctrl	B4GAT1	SO	38.28172897265185
JJ105	vgat	B4GAT1-Ctrl	B4GAT1	All	45.905146911694004
JJ105	vgat	B4GAT1-Ctrl	B4GAT1	SP	50.0080062600007
JJ105	vgat	B4GAT1-Ctrl	B4GAT1	SR	45.084519480845174
JJ105	vgat	B4GAT1-Ctrl	B4GAT1	SO	41.62348187731183
JJ106	vgat	B4GAT1-Ctrl	B4GAT1	All	43.77195023712524
JJ106	vgat	B4GAT1-Ctrl	B4GAT1	SP	48.70780581130135
JJ106	vgat	B4GAT1-Ctrl	B4GAT1	SR	41.75015413504841
JJ106	vgat	B4GAT1-Ctrl	B4GAT1	SO	39.14206755056752
JJ107	vgat	B4GAT1-Ctrl	B4GAT1	All	43.89604719104
JJ107	vgat	B4GAT1-Ctrl	B4GAT1	SP	48.54209716703138
JJ107	vgat	B4GAT1-Ctrl	B4GAT1	SR	42.692392013534864
JJ107	vgat	B4GAT1-Ctrl	B4GAT1	SO	39.21487643579574
JJ108	vgat	B4GAT1-Ctrl	B4GAT1	All	45.89348914125329
JJ108	vgat	B4GAT1-Ctrl	B4GAT1	SP	49.08560016021795
JJ108	vgat	B4GAT1-Ctrl	B4GAT1	SR	45.63073309310106
JJ108	vgat	B4GAT1-Ctrl	B4GAT1	SO	41.97973059948665
JJ215	vgat	FKRP-Mutant	FKRP	All	41.61546252543616
JJ215	vgat	FKRP-Mutant	FKRP	SP	43.241048925089885
JJ215	vgat	FKRP-Mutant	FKRP	SR	40.66188535265602
JJ215	vgat	FKRP-Mutant	FKRP	SO	40.200650808845545
JJ216	vgat	FKRP-Mutant	FKRP	All	45.92960134917807
JJ216	vgat	FKRP-Mutant	FKRP	SP	49.13294985408148
JJ216	vgat	FKRP-Mutant	FKRP	SR	43.86207270949176
JJ216	vgat	FKRP-Mutant	FKRP	SO	43.515089213359666
JJ217	vgat	FKRP-Mutant	FKRP	All	40.24090566477682
JJ217	vgat	FKRP-Mutant	FKRP	SP	46.224768976033864
JJ217	vgat	FKRP-Mutant	FKRP	SR	37.02677050740486
JJ217	vgat	FKRP-Mutant	FKRP	SO	35.12900916641124
JJ218	vgat	FKRP-Mutant	FKRP	All	36.63848309297207
JJ218	vgat	FKRP-Mutant	FKRP	SP	40.730334119260796
JJ218	vgat	FKRP-Mutant	FKRP	SR	35.03906754641691
JJ218	vgat	FKRP-Mutant	FKRP	SO	32.52683892565244
JJ219	vgat	FKRP-Ctrl	FKRP	All	39.04422564983168
JJ219	vgat	FKRP-Ctrl	FKRP	SP	42.317796839962924
JJ219	vgat	FKRP-Ctrl	FKRP	SR	37.45552710419363
JJ219	vgat	FKRP-Ctrl	FKRP	SO	35.53303898934322
JJ220	vgat	FKRP-Ctrl	FKRP	All	35.05911198762829
JJ220	vgat	FKRP-Ctrl	FKRP	SP	40.21300654845931
JJ220	vgat	FKRP-Ctrl	FKRP	SR	32.274104318985096
JJ220	vgat	FKRP-Ctrl	FKRP	SO	31.027962322447298
JJ221	vgat	FKRP-Ctrl	FKRP	All	32.39660605391531
JJ221	vgat	FKRP-Ctrl	FKRP	SP	37.93912286498964
JJ221	vgat	FKRP-Ctrl	FKRP	SR	29.20560509225929
JJ221	vgat	FKRP-Ctrl	FKRP	SO	28.233158422414512
JJ222	vgat	FKRP-Ctrl	FKRP	All	35.14916434284555
JJ222	vgat	FKRP-Ctrl	FKRP	SP	39.54255711668888
JJ222	vgat	FKRP-Ctrl	FKRP	SR	32.9233530713298
JJ222	vgat	FKRP-Ctrl	FKRP	SO	32.64095469074462
JJ223	vgat	FKRP-Ctrl	FKRP	All	36.48999468359887
JJ223	vgat	FKRP-Ctrl	FKRP	SP	40.52512249679568
JJ223	vgat	FKRP-Ctrl	FKRP	SR	34.37518908603279
JJ223	vgat	FKRP-Ctrl	FKRP	SO	33.86728506048459
JJ224	vgat	FKRP-Ctrl	FKRP	All	34.695422780716555
JJ224	vgat	FKRP-Ctrl	FKRP	SP	39.364969104021014
JJ224	vgat	FKRP-Ctrl	FKRP	SR	32.973286054453716
JJ224	vgat	FKRP-Ctrl	FKRP	SO	30.68496779748365
JJ225	vgat	FKRP-Ctrl	FKRP	All	33.40067523129443
JJ225	vgat	FKRP-Ctrl	FKRP	SP	38.50141502036743
JJ225	vgat	FKRP-Ctrl	FKRP	SR	31.333612576337824
JJ225	vgat	FKRP-Ctrl	FKRP	SO	29.600806606325214
JJ238	vgat	FKRP-Mutant	FKRP	All	38.64340029361818
JJ238	vgat	FKRP-Mutant	FKRP	SP	42.26854701952665
JJ238	vgat	FKRP-Mutant	FKRP	SR	35.49811406531177
JJ238	vgat	FKRP-Mutant	FKRP	SO	35.940036098560235
JJ239	vgat	FKRP-Mutant	FKRP	All	40.54446188986901
JJ239	vgat	FKRP-Mutant	FKRP	SP	43.74029803462462
JJ239	vgat	FKRP-Mutant	FKRP	SR	38.09207008273462
JJ239	vgat	FKRP-Mutant	FKRP	SO	37.67043179693133
JJ240	vgat	FKRP-Mutant	FKRP	All	38.85516586548117
JJ240	vgat	FKRP-Mutant	FKRP	SP	42.10309454082551
JJ240	vgat	FKRP-Mutant	FKRP	SR	36.17227360212307
JJ240	vgat	FKRP-Mutant	FKRP	SO	36.37340294787869
JJ241	vgat	FKRP-Mutant	FKRP	All	39.09506816688141
JJ241	vgat	FKRP-Mutant	FKRP	SP	42.25457468051399
JJ241	vgat	FKRP-Mutant	FKRP	SR	36.548472199566476
JJ241	vgat	FKRP-Mutant	FKRP	SO	36.95638332377273
JJ246	vgat	FKRP-Ctrl	FKRP	All	41.52637085102295
JJ246	vgat	FKRP-Ctrl	FKRP	SP	45.49766571891227
JJ246	vgat	FKRP-Ctrl	FKRP	SR	38.72809456783494
JJ246	vgat	FKRP-Ctrl	FKRP	SO	39.38704210998896
JJ247	vgat	FKRP-Ctrl	FKRP	All	41.895316355848784
JJ247	vgat	FKRP-Ctrl	FKRP	SP	45.62875018198415
JJ247	vgat	FKRP-Ctrl	FKRP	SR	39.34773847108243
JJ247	vgat	FKRP-Ctrl	FKRP	SO	40.029652284035386
JJ248	vgat	FKRP-Ctrl	FKRP	All	39.3863103889538
JJ248	vgat	FKRP-Ctrl	FKRP	SP	43.664244899358344
JJ248	vgat	FKRP-Ctrl	FKRP	SR	36.46495620950385
JJ248	vgat	FKRP-Ctrl	FKRP	SO	37.305286087232034
JJ249	vgat	FKRP-Ctrl	FKRP	All	39.98637105146903
JJ249	vgat	FKRP-Ctrl	FKRP	SP	43.91840441883963
JJ249	vgat	FKRP-Ctrl	FKRP	SR	36.449684428990075
JJ249	vgat	FKRP-Ctrl	FKRP	SO	38.46804738266934
JJ250	vgat	FKRP-Mutant	FKRP	All	37.26833574961337
JJ250	vgat	FKRP-Mutant	FKRP	SP	40.72458536304381
JJ250	vgat	FKRP-Mutant	FKRP	SR	34.27070661243238
JJ250	vgat	FKRP-Mutant	FKRP	SO	36.29591573517748
JJ251	vgat	FKRP-Mutant	FKRP	All	39.01751520322385
JJ251	vgat	FKRP-Mutant	FKRP	SP	41.496664096295405
JJ251	vgat	FKRP-Mutant	FKRP	SR	38.35009401729003
JJ251	vgat	FKRP-Mutant	FKRP	SO	36.49215580050784
JJ252	vgat	FKRP-Mutant	FKRP	All	37.46484672483188
JJ252	vgat	FKRP-Mutant	FKRP	SP	40.08607213582284
JJ252	vgat	FKRP-Mutant	FKRP	SR	37.12385323793735
JJ252	vgat	FKRP-Mutant	FKRP	SO	34.831329954450545
JJ253	vgat	FKRP-Mutant	FKRP	All	38.44801454251525
JJ253	vgat	FKRP-Mutant	FKRP	SP	40.89496068179882
JJ253	vgat	FKRP-Mutant	FKRP	SR	38.48855311673804
JJ253	vgat	FKRP-Mutant	FKRP	SO	35.33977267742526
JJ254	vgat	FKRP-Mutant	FKRP	All	42.86592362962514
JJ254	vgat	FKRP-Mutant	FKRP	SP	45.71846122315778
JJ254	vgat	FKRP-Mutant	FKRP	SR	41.89841420275481
JJ254	vgat	FKRP-Mutant	FKRP	SO	40.37006787569312
JJ255	vgat	FKRP-Mutant	FKRP	All	40.43687355969208
JJ255	vgat	FKRP-Mutant	FKRP	SP	43.746498078224036
JJ255	vgat	FKRP-Mutant	FKRP	SR	38.43010359228023
JJ255	vgat	FKRP-Mutant	FKRP	SO	38.19951917845064
JJ256	vgat	FKRP-Mutant	FKRP	All	42.05350484370334
JJ256	vgat	FKRP-Mutant	FKRP	SP	45.09056011804329
JJ256	vgat	FKRP-Mutant	FKRP	SR	41.18324422211095
JJ256	vgat	FKRP-Mutant	FKRP	SO	39.59198018646923
JJ257	vgat	FKRP-Mutant	FKRP	All	41.15515417586539
JJ257	vgat	FKRP-Mutant	FKRP	SP	44.65781766748763
JJ257	vgat	FKRP-Mutant	FKRP	SR	39.75213544790896
JJ257	vgat	FKRP-Mutant	FKRP	SO	38.185446993964895
JJ258	vgat	FKRP-Ctrl	FKRP	All	36.58865814130692
JJ258	vgat	FKRP-Ctrl	FKRP	SP	39.63767455647254
JJ258	vgat	FKRP-Ctrl	FKRP	SR	35.46779437902824
JJ258	vgat	FKRP-Ctrl	FKRP	SO	34.20285387128529
JJ259	vgat	FKRP-Ctrl	FKRP	All	38.15640814509292
JJ259	vgat	FKRP-Ctrl	FKRP	SP	40.85520375746967
JJ259	vgat	FKRP-Ctrl	FKRP	SR	37.56522397290712
JJ259	vgat	FKRP-Ctrl	FKRP	SO	34.61415959189528
JJ260	vgat	FKRP-Ctrl	FKRP	All	38.60665099654694
JJ260	vgat	FKRP-Ctrl	FKRP	SP	40.80836049349742
JJ260	vgat	FKRP-Ctrl	FKRP	SR	37.894462799473715
JJ260	vgat	FKRP-Ctrl	FKRP	SO	36.80281526756409
JJ261	vgat	FKRP-Ctrl	FKRP	All	37.89871576259785
JJ261	vgat	FKRP-Ctrl	FKRP	SP	40.26823491626964
JJ261	vgat	FKRP-Ctrl	FKRP	SR	37.04944090908082
JJ261	vgat	FKRP-Ctrl	FKRP	SO	35.391433873600455
JJ262	vgat	FKRP-Ctrl	FKRP	All	43.847721773997314
JJ262	vgat	FKRP-Ctrl	FKRP	SP	45.683489534197676
JJ262	vgat	FKRP-Ctrl	FKRP	SR	43.14915482685972
JJ262	vgat	FKRP-Ctrl	FKRP	SO	41.8733259083005
JJ263	vgat	FKRP-Ctrl	FKRP	All	40.1766841009921
JJ263	vgat	FKRP-Ctrl	FKRP	SP	43.51644752758581
JJ263	vgat	FKRP-Ctrl	FKRP	SR	38.632484894844204
JJ263	vgat	FKRP-Ctrl	FKRP	SO	37.53794717649194
JJ264	vgat	FKRP-Ctrl	FKRP	All	42.5625000895945
JJ264	vgat	FKRP-Ctrl	FKRP	SP	44.393969773239796
JJ264	vgat	FKRP-Ctrl	FKRP	SR	41.32114781499131
JJ264	vgat	FKRP-Ctrl	FKRP	SO	41.28620989536434
JJ265	vgat	FKRP-Ctrl	FKRP	All	42.62881759185195
JJ265	vgat	FKRP-Ctrl	FKRP	SP	45.11097363099046
JJ265	vgat	FKRP-Ctrl	FKRP	SR	40.80463396151085
JJ265	vgat	FKRP-Ctrl	FKRP	SO	41.327664821485385
JJ326	vgat	FKRP-Mutant	FKRP	All	46.325460468288604
JJ326	vgat	FKRP-Mutant	FKRP	SP	48.585182039613315
JJ326	vgat	FKRP-Mutant	FKRP	SR	46.2192543363657
JJ326	vgat	FKRP-Mutant	FKRP	SO	43.5581792190852
JJ327	vgat	FKRP-Mutant	FKRP	All	45.15841683735195
JJ327	vgat	FKRP-Mutant	FKRP	SP	47.78637716598727
JJ327	vgat	FKRP-Mutant	FKRP	SR	45.196234202022524
JJ327	vgat	FKRP-Mutant	FKRP	SO	41.98271831134491
JJ328	vgat	FKRP-Mutant	FKRP	All	46.01470664627566
JJ328	vgat	FKRP-Mutant	FKRP	SP	47.82712683456302
JJ328	vgat	FKRP-Mutant	FKRP	SR	45.7837366940002
JJ328	vgat	FKRP-Mutant	FKRP	SO	44.30605967539157
JJ329	vgat	FKRP-Mutant	FKRP	All	44.72327835033461
JJ329	vgat	FKRP-Mutant	FKRP	SP	47.40957233755978
JJ329	vgat	FKRP-Mutant	FKRP	SR	44.42829491486824
JJ329	vgat	FKRP-Mutant	FKRP	SO	41.98594294779882
JJ330	vgat	FKRP-Ctrl	FKRP	All	47.29126706484186
JJ330	vgat	FKRP-Ctrl	FKRP	SP	49.896747431688645
JJ330	vgat	FKRP-Ctrl	FKRP	SR	47.12099823790216
JJ330	vgat	FKRP-Ctrl	FKRP	SO	44.677342618813064
JJ331	vgat	FKRP-Ctrl	FKRP	All	47.18844873939427
JJ331	vgat	FKRP-Ctrl	FKRP	SP	49.99480821194798
JJ331	vgat	FKRP-Ctrl	FKRP	SR	46.644926806179875
JJ331	vgat	FKRP-Ctrl	FKRP	SO	44.37913194306603
JJ332	vgat	FKRP-Ctrl	FKRP	All	46.44531222346383
JJ332	vgat	FKRP-Ctrl	FKRP	SP	48.977712314633685
JJ332	vgat	FKRP-Ctrl	FKRP	SR	46.29644504323765
JJ332	vgat	FKRP-Ctrl	FKRP	SO	43.56443436552353
JJ333	vgat	FKRP-Ctrl	FKRP	All	48.088870803855485
JJ333	vgat	FKRP-Ctrl	FKRP	SP	49.67456592985452
JJ333	vgat	FKRP-Ctrl	FKRP	SR	48.46900460196027
JJ333	vgat	FKRP-Ctrl	FKRP	SO	45.802263876537275
JJ334	vgat	FKRP-Mutant	FKRP	All	41.81325994605079
JJ334	vgat	FKRP-Mutant	FKRP	SP	43.99459862117632
JJ334	vgat	FKRP-Mutant	FKRP	SR	40.77895274271422
JJ334	vgat	FKRP-Mutant	FKRP	SO	40.54308460579218
JJ335	vgat	FKRP-Mutant	FKRP	All	39.76056101526993
JJ335	vgat	FKRP-Mutant	FKRP	SP	42.84770391735949
JJ335	vgat	FKRP-Mutant	FKRP	SR	39.388329618622
JJ335	vgat	FKRP-Mutant	FKRP	SO	36.58393748184265
JJ336	vgat	FKRP-Mutant	FKRP	All	40.79167977132981
JJ336	vgat	FKRP-Mutant	FKRP	SP	42.902073181217986
JJ336	vgat	FKRP-Mutant	FKRP	SR	40.683840080322135
JJ336	vgat	FKRP-Mutant	FKRP	SO	38.5665148623445
JJ337	vgat	FKRP-Mutant	FKRP	All	41.22808818536555
JJ337	vgat	FKRP-Mutant	FKRP	SP	44.02739375008194
JJ337	vgat	FKRP-Mutant	FKRP	SR	40.51954143420621
JJ337	vgat	FKRP-Mutant	FKRP	SO	39.44489658700824
JJ338	vgat	FKRP-Ctrl	FKRP	All	40.305950727148264
JJ338	vgat	FKRP-Ctrl	FKRP	SP	43.831756419009054
JJ338	vgat	FKRP-Ctrl	FKRP	SR	39.263713919894506
JJ338	vgat	FKRP-Ctrl	FKRP	SO	38.08463556548819
JJ339	vgat	FKRP-Ctrl	FKRP	All	40.16733418391252
JJ339	vgat	FKRP-Ctrl	FKRP	SP	43.492424601268205
JJ339	vgat	FKRP-Ctrl	FKRP	SR	39.26333728068019
JJ339	vgat	FKRP-Ctrl	FKRP	SO	36.8344024406647
JJ340	vgat	FKRP-Ctrl	FKRP	All	41.08637854183576
JJ340	vgat	FKRP-Ctrl	FKRP	SP	44.00129192286702
JJ340	vgat	FKRP-Ctrl	FKRP	SR	39.96929510766099
JJ340	vgat	FKRP-Ctrl	FKRP	SO	39.12295236116498
JJ341	vgat	FKRP-Ctrl	FKRP	All	41.971594649782496
JJ341	vgat	FKRP-Ctrl	FKRP	SP	44.63130255892326
JJ341	vgat	FKRP-Ctrl	FKRP	SR	41.34026507271298
JJ341	vgat	FKRP-Ctrl	FKRP	SO	39.58834077548204
JJ226	vgat	ICD-Mutant	ICD	All	36.16988141703222
JJ226	vgat	ICD-Mutant	ICD	SP	40.078090961459544
JJ226	vgat	ICD-Mutant	ICD	SR	34.17078553178142
JJ226	vgat	ICD-Mutant	ICD	SO	33.96048692111057
JJ227	vgat	ICD-Mutant	ICD	All	37.86129526225177
JJ227	vgat	ICD-Mutant	ICD	SP	40.725072260744014
JJ227	vgat	ICD-Mutant	ICD	SR	37.24560367307787
JJ227	vgat	ICD-Mutant	ICD	SO	34.40608726939402
JJ228	vgat	ICD-Mutant	ICD	All	38.69729007786958
JJ228	vgat	ICD-Mutant	ICD	SP	41.4774993620809
JJ228	vgat	ICD-Mutant	ICD	SR	35.86347848055564
JJ228	vgat	ICD-Mutant	ICD	SO	37.979292829950516
JJ229	vgat	ICD-Mutant	ICD	All	36.75915040423599
JJ229	vgat	ICD-Mutant	ICD	SP	40.721987464733644
JJ229	vgat	ICD-Mutant	ICD	SR	32.80169669004101
JJ229	vgat	ICD-Mutant	ICD	SO	35.5466778987135
JJ234	vgat	ICD-Ctrl	ICD	All	36.86668278394473
JJ234	vgat	ICD-Ctrl	ICD	SP	40.69996507210395
JJ234	vgat	ICD-Ctrl	ICD	SR	35.00356487424246
JJ234	vgat	ICD-Ctrl	ICD	SO	33.403445530381994
JJ235	vgat	ICD-Ctrl	ICD	All	35.99142290200603
JJ235	vgat	ICD-Ctrl	ICD	SP	40.38217246325111
JJ235	vgat	ICD-Ctrl	ICD	SR	34.03623459694444
JJ235	vgat	ICD-Ctrl	ICD	SO	32.06813966805083
JJ236	vgat	ICD-Ctrl	ICD	All	39.195288557389034
JJ236	vgat	ICD-Ctrl	ICD	SP	42.321497740407736
JJ236	vgat	ICD-Ctrl	ICD	SR	35.28183394591217
JJ236	vgat	ICD-Ctrl	ICD	SO	38.332033285769356
JJ237	vgat	ICD-Ctrl	ICD	All	36.24735969679932
JJ237	vgat	ICD-Ctrl	ICD	SP	39.902859694795744
JJ237	vgat	ICD-Ctrl	ICD	SR	29.799348972381427
JJ237	vgat	ICD-Ctrl	ICD	SO	35.44291170946737
JJ266	vgat	ICD-Mutant	ICD	All	41.79773884219547
JJ266	vgat	ICD-Mutant	ICD	SP	44.83876523025717
JJ266	vgat	ICD-Mutant	ICD	SR	36.799049172821
JJ266	vgat	ICD-Mutant	ICD	SO	42.33318434564534
JJ267	vgat	ICD-Mutant	ICD	All	41.671452275080235
JJ267	vgat	ICD-Mutant	ICD	SP	44.25203470725434
JJ267	vgat	ICD-Mutant	ICD	SR	41.26611586083764
JJ267	vgat	ICD-Mutant	ICD	SO	38.36077065827402
JJ268	vgat	ICD-Mutant	ICD	All	43.155288901035995
JJ268	vgat	ICD-Mutant	ICD	SP	45.19161866836619
JJ268	vgat	ICD-Mutant	ICD	SR	42.35048681679572
JJ268	vgat	ICD-Mutant	ICD	SO	41.12284091459124
JJ269	vgat	ICD-Mutant	ICD	All	41.94238980649384
JJ269	vgat	ICD-Mutant	ICD	SP	44.56333945283681
JJ269	vgat	ICD-Mutant	ICD	SR	40.39078025828508
JJ269	vgat	ICD-Mutant	ICD	SO	39.80506040018289
JJ274	vgat	ICD-Ctrl	ICD	All	43.24773675891876
JJ274	vgat	ICD-Ctrl	ICD	SP	46.06928130875179
JJ274	vgat	ICD-Ctrl	ICD	SR	41.95715261952426
JJ274	vgat	ICD-Ctrl	ICD	SO	40.418695660592604
JJ275	vgat	ICD-Ctrl	ICD	All	43.461990927358976
JJ275	vgat	ICD-Ctrl	ICD	SP	45.76497932076342
JJ275	vgat	ICD-Ctrl	ICD	SR	42.14279576150151
JJ275	vgat	ICD-Ctrl	ICD	SO	41.4739418187253
JJ276	vgat	ICD-Ctrl	ICD	All	41.99056407622772
JJ276	vgat	ICD-Ctrl	ICD	SP	44.678551755804435
JJ276	vgat	ICD-Ctrl	ICD	SR	40.97603497788177
JJ276	vgat	ICD-Ctrl	ICD	SO	39.021861560428256
JJ277	vgat	ICD-Ctrl	ICD	All	42.42619905878655
JJ277	vgat	ICD-Ctrl	ICD	SP	44.780420774617234
JJ277	vgat	ICD-Ctrl	ICD	SR	41.84209974023781
JJ277	vgat	ICD-Ctrl	ICD	SO	39.675901115695765
JJ294	vgat	ICD-Mutant	ICD	All	44.68310461113448
JJ294	vgat	ICD-Mutant	ICD	SP	44.212437952124574
JJ294	vgat	ICD-Mutant	ICD	SR	45.03689459136506
JJ294	vgat	ICD-Mutant	ICD	SO	43.887213566654346
JJ295	vgat	ICD-Mutant	ICD	All	43.90943682877479
JJ295	vgat	ICD-Mutant	ICD	SP	44.32983889602919
JJ295	vgat	ICD-Mutant	ICD	SR	44.29281923888368
JJ295	vgat	ICD-Mutant	ICD	SO	42.31679998064514
JJ296	vgat	ICD-Mutant	ICD	All	39.62823777001751
JJ296	vgat	ICD-Mutant	ICD	SP	42.14283435387923
JJ296	vgat	ICD-Mutant	ICD	SR	39.32778249632526
JJ296	vgat	ICD-Mutant	ICD	SO	36.94156999859492
JJ297	vgat	ICD-Mutant	ICD	All	40.66412496948214
JJ297	vgat	ICD-Mutant	ICD	SP	42.16378571330625
JJ297	vgat	ICD-Mutant	ICD	SR	40.31833225656439
JJ297	vgat	ICD-Mutant	ICD	SO	38.69921104174408
JJ298	vgat	ICD-Mutant	ICD	All	46.83474030544868
JJ298	vgat	ICD-Mutant	ICD	SP	48.26859886779804
JJ298	vgat	ICD-Mutant	ICD	SR	46.30915026236297
JJ298	vgat	ICD-Mutant	ICD	SO	45.15943840601709
JJ299	vgat	ICD-Mutant	ICD	All	45.797390253619724
JJ299	vgat	ICD-Mutant	ICD	SP	47.80111798139812
JJ299	vgat	ICD-Mutant	ICD	SR	45.276362038813986
JJ299	vgat	ICD-Mutant	ICD	SO	43.55891103486471
JJ300	vgat	ICD-Mutant	ICD	All	46.3245478444363
JJ300	vgat	ICD-Mutant	ICD	SP	47.75868364449125
JJ300	vgat	ICD-Mutant	ICD	SR	45.736954316156975
JJ300	vgat	ICD-Mutant	ICD	SO	44.957437274348415
JJ301	vgat	ICD-Mutant	ICD	All	44.46920367566925
JJ301	vgat	ICD-Mutant	ICD	SP	46.651518829722946
JJ301	vgat	ICD-Mutant	ICD	SR	44.03460495909594
JJ301	vgat	ICD-Mutant	ICD	SO	41.8636636780252
JJ302	vgat	ICD-Mutant	ICD	All	44.11893121102523
JJ302	vgat	ICD-Mutant	ICD	SP	45.039492937659126
JJ302	vgat	ICD-Mutant	ICD	SR	43.23547713768559
JJ302	vgat	ICD-Mutant	ICD	SO	42.92503739184719
JJ303	vgat	ICD-Mutant	ICD	All	43.8600497795487
JJ303	vgat	ICD-Mutant	ICD	SP	45.236801864276835
JJ303	vgat	ICD-Mutant	ICD	SR	42.62538227057621
JJ303	vgat	ICD-Mutant	ICD	SO	43.11459297829927
JJ304	vgat	ICD-Mutant	ICD	All	41.329982171127305
JJ304	vgat	ICD-Mutant	ICD	SP	43.35068452481042
JJ304	vgat	ICD-Mutant	ICD	SR	40.30168061100145
JJ304	vgat	ICD-Mutant	ICD	SO	39.39531989329978
JJ305	vgat	ICD-Mutant	ICD	All	42.00883796203324
JJ305	vgat	ICD-Mutant	ICD	SP	43.4470184337437
JJ305	vgat	ICD-Mutant	ICD	SR	41.35380441361167
JJ305	vgat	ICD-Mutant	ICD	SO	40.43074135608189
JJ306	vgat	ICD-Mutant	ICD	All	50.31361762207058
JJ306	vgat	ICD-Mutant	ICD	SP	51.27462612040412
JJ306	vgat	ICD-Mutant	ICD	SR	50.47429248349829
JJ306	vgat	ICD-Mutant	ICD	SO	48.39115867960877
JJ307	vgat	ICD-Mutant	ICD	All	49.31781260495445
JJ307	vgat	ICD-Mutant	ICD	SP	50.387970555293485
JJ307	vgat	ICD-Mutant	ICD	SR	49.19033086911966
JJ307	vgat	ICD-Mutant	ICD	SO	47.450587115279
JJ308	vgat	ICD-Mutant	ICD	All	45.9210931600688
JJ308	vgat	ICD-Mutant	ICD	SP	47.38291125925844
JJ308	vgat	ICD-Mutant	ICD	SR	45.957045520287735
JJ308	vgat	ICD-Mutant	ICD	SO	43.66610200848714
JJ309	vgat	ICD-Mutant	ICD	All	47.43067605766625
JJ309	vgat	ICD-Mutant	ICD	SP	49.66163826010077
JJ309	vgat	ICD-Mutant	ICD	SR	47.49429555324923
JJ309	vgat	ICD-Mutant	ICD	SO	44.982276896871554
JJ310	vgat	ICD-Ctrl	ICD	All	38.10164820600486
JJ310	vgat	ICD-Ctrl	ICD	SP	41.00799762711911
JJ310	vgat	ICD-Ctrl	ICD	SR	36.71211010657093
JJ310	vgat	ICD-Ctrl	ICD	SO	34.34376483223767
JJ311	vgat	ICD-Ctrl	ICD	All	40.419917451716096
JJ311	vgat	ICD-Ctrl	ICD	SP	42.407657375954344
JJ311	vgat	ICD-Ctrl	ICD	SR	40.08662739239526
JJ311	vgat	ICD-Ctrl	ICD	SO	37.668730443835635
JJ312	vgat	ICD-Ctrl	ICD	All	39.94690483875588
JJ312	vgat	ICD-Ctrl	ICD	SP	41.98946046782135
JJ312	vgat	ICD-Ctrl	ICD	SR	39.82474982551174
JJ312	vgat	ICD-Ctrl	ICD	SO	36.62381378529565
JJ313	vgat	ICD-Ctrl	ICD	All	39.37352775772004
JJ313	vgat	ICD-Ctrl	ICD	SP	41.5907361708837
JJ313	vgat	ICD-Ctrl	ICD	SR	39.37600083670986
JJ313	vgat	ICD-Ctrl	ICD	SO	35.703938841395924
JJ314	vgat	ICD-Ctrl	ICD	All	46.1843751565317
JJ314	vgat	ICD-Ctrl	ICD	SP	49.05075394975147
JJ314	vgat	ICD-Ctrl	ICD	SR	45.90526347197582
JJ314	vgat	ICD-Ctrl	ICD	SO	42.00920762664345
JJ315	vgat	ICD-Ctrl	ICD	All	49.54379414092887
JJ315	vgat	ICD-Ctrl	ICD	SP	50.83248763036366
JJ315	vgat	ICD-Ctrl	ICD	SR	49.453814739292795
JJ315	vgat	ICD-Ctrl	ICD	SO	47.44473053507367
JJ316	vgat	ICD-Ctrl	ICD	All	46.29867210150763
JJ316	vgat	ICD-Ctrl	ICD	SP	48.178271627012776
JJ316	vgat	ICD-Ctrl	ICD	SR	45.8373436894433
JJ316	vgat	ICD-Ctrl	ICD	SO	44.146399863458925
JJ317	vgat	ICD-Ctrl	ICD	All	45.82671481786524
JJ317	vgat	ICD-Ctrl	ICD	SP	47.87958064470032
JJ317	vgat	ICD-Ctrl	ICD	SR	45.06694261866299
JJ317	vgat	ICD-Ctrl	ICD	SO	43.47409253031436
JJ318	vgat	ICD-Ctrl	ICD	All	44.53496016256643
JJ318	vgat	ICD-Ctrl	ICD	SP	46.14844819837019
JJ318	vgat	ICD-Ctrl	ICD	SR	44.379785764909265
JJ318	vgat	ICD-Ctrl	ICD	SO	41.80328632147729
JJ319	vgat	ICD-Ctrl	ICD	All	43.87209254708594
JJ319	vgat	ICD-Ctrl	ICD	SP	45.77624787670696
JJ319	vgat	ICD-Ctrl	ICD	SR	42.807287524256324
JJ319	vgat	ICD-Ctrl	ICD	SO	42.248355829022664
JJ320	vgat	ICD-Ctrl	ICD	All	41.58357388124585
JJ320	vgat	ICD-Ctrl	ICD	SP	44.13700902821881
JJ320	vgat	ICD-Ctrl	ICD	SR	41.59397795252124
JJ320	vgat	ICD-Ctrl	ICD	SO	37.95560879069911
JJ321	vgat	ICD-Ctrl	ICD	All	41.26655245982653
JJ321	vgat	ICD-Ctrl	ICD	SP	43.7344977695481
JJ321	vgat	ICD-Ctrl	ICD	SR	40.34366452419699
JJ321	vgat	ICD-Ctrl	ICD	SO	38.68714704643741
JJ322	vgat	ICD-Ctrl	ICD	All	44.70463438602622
JJ322	vgat	ICD-Ctrl	ICD	SP	47.42965930745846
JJ322	vgat	ICD-Ctrl	ICD	SR	43.50196338206686
JJ322	vgat	ICD-Ctrl	ICD	SO	42.177804907021184
JJ323	vgat	ICD-Ctrl	ICD	All	47.26576460096636
JJ323	vgat	ICD-Ctrl	ICD	SP	49.800022838920576
JJ323	vgat	ICD-Ctrl	ICD	SR	46.192608459290184
JJ323	vgat	ICD-Ctrl	ICD	SO	45.061269314881784
JJ324	vgat	ICD-Ctrl	ICD	All	45.59265548902408
JJ324	vgat	ICD-Ctrl	ICD	SP	48.226846950755
JJ324	vgat	ICD-Ctrl	ICD	SR	44.53065437680492
JJ324	vgat	ICD-Ctrl	ICD	SO	43.43535251213576
JJ325	vgat	ICD-Ctrl	ICD	All	45.096250418405376
JJ325	vgat	ICD-Ctrl	ICD	SP	48.34549546722188
JJ325	vgat	ICD-Ctrl	ICD	SR	43.6215051025071
JJ325	vgat	ICD-Ctrl	ICD	SO	42.510165744831724
JJ111	cb1r	Emx-DG-cKO	Emx-DG	All	27.723993648079663
JJ111	cb1r	Emx-DG-cKO	Emx-DG	SP	27.272480989487693
JJ111	cb1r	Emx-DG-cKO	Emx-DG	SR	27.83933140720964
JJ111	cb1r	Emx-DG-cKO	Emx-DG	SO	26.596538613373646
JJ112	cb1r	Emx-DG-cKO	Emx-DG	All	29.11491407776778
JJ112	cb1r	Emx-DG-cKO	Emx-DG	SP	28.783983960249728
JJ112	cb1r	Emx-DG-cKO	Emx-DG	SR	28.745119892519067
JJ112	cb1r	Emx-DG-cKO	Emx-DG	SO	28.31845480774731
JJ113	cb1r	Emx-DG-cKO	Emx-DG	All	27.283807948446047
JJ113	cb1r	Emx-DG-cKO	Emx-DG	SP	27.008113392149156
JJ113	cb1r	Emx-DG-cKO	Emx-DG	SR	26.60660802083554
JJ113	cb1r	Emx-DG-cKO	Emx-DG	SO	26.51066420444701
JJ114	cb1r	Emx-DG-cKO	Emx-DG	All	25.89071829870544
JJ114	cb1r	Emx-DG-cKO	Emx-DG	SP	24.775078211808985
JJ114	cb1r	Emx-DG-cKO	Emx-DG	SR	26.649883407920033
JJ114	cb1r	Emx-DG-cKO	Emx-DG	SO	23.754173000817705
JJ115	cb1r	Emx-DG-cKO	Emx-DG	All	28.278998176945002
JJ115	cb1r	Emx-DG-cKO	Emx-DG	SP	27.880549553356428
JJ115	cb1r	Emx-DG-cKO	Emx-DG	SR	29.134213379678975
JJ115	cb1r	Emx-DG-cKO	Emx-DG	SO	26.066175538155772
JJ121	cb1r	Emx-DG-Ctrl	Emx-DG	All	30.879626695378846
JJ121	cb1r	Emx-DG-Ctrl	Emx-DG	SP	35.109103384368794
JJ121	cb1r	Emx-DG-Ctrl	Emx-DG	SR	29.022854465635575
JJ121	cb1r	Emx-DG-Ctrl	Emx-DG	SO	23.073694386493102
JJ122	cb1r	Emx-DG-Ctrl	Emx-DG	All	30.859856641651522
JJ122	cb1r	Emx-DG-Ctrl	Emx-DG	SP	34.51043950430926
JJ122	cb1r	Emx-DG-Ctrl	Emx-DG	SR	30.000011937440803
JJ122	cb1r	Emx-DG-Ctrl	Emx-DG	SO	23.213947162627264
JJ123	cb1r	Emx-DG-Ctrl	Emx-DG	All	32.887201985231584
JJ123	cb1r	Emx-DG-Ctrl	Emx-DG	SP	35.86490823685405
JJ123	cb1r	Emx-DG-Ctrl	Emx-DG	SR	32.31664811999379
JJ123	cb1r	Emx-DG-Ctrl	Emx-DG	SO	28.061459788370357
JJ124	cb1r	Emx-DG-Ctrl	Emx-DG	All	33.52081138558527
JJ124	cb1r	Emx-DG-Ctrl	Emx-DG	SP	36.887082644721225
JJ124	cb1r	Emx-DG-Ctrl	Emx-DG	SR	32.817100509022744
JJ124	cb1r	Emx-DG-Ctrl	Emx-DG	SO	27.893109899232908
JJ345	cb1r	Emx-DG-cKO	Emx-DG	All	30.69868278516284
JJ345	cb1r	Emx-DG-cKO	Emx-DG	SP	28.273328767227696
JJ345	cb1r	Emx-DG-cKO	Emx-DG	SR	31.738292868238272
JJ345	cb1r	Emx-DG-cKO	Emx-DG	SO	29.469655701029552
JJ346	cb1r	Emx-DG-cKO	Emx-DG	All	30.11365980782726
JJ346	cb1r	Emx-DG-cKO	Emx-DG	SP	29.014122708553906
JJ346	cb1r	Emx-DG-cKO	Emx-DG	SR	30.88841727888251
JJ346	cb1r	Emx-DG-cKO	Emx-DG	SO	28.629947928844253
JJ347	cb1r	Emx-DG-cKO	Emx-DG	All	26.449713918627726
JJ347	cb1r	Emx-DG-cKO	Emx-DG	SP	23.923378315122097
JJ347	cb1r	Emx-DG-cKO	Emx-DG	SR	25.88287888180326
JJ347	cb1r	Emx-DG-cKO	Emx-DG	SO	26.87855249016768
JJ348	cb1r	Emx-DG-cKO	Emx-DG	All	28.067654684809085
JJ348	cb1r	Emx-DG-cKO	Emx-DG	SP	27.38690184357778
JJ348	cb1r	Emx-DG-cKO	Emx-DG	SR	27.017824436802606
JJ348	cb1r	Emx-DG-cKO	Emx-DG	SO	27.67333000143595
JJ353	cb1r	Emx-DG-cKO	Emx-DG	All	28.753593790233275
JJ353	cb1r	Emx-DG-cKO	Emx-DG	SP	25.487779040957832
JJ353	cb1r	Emx-DG-cKO	Emx-DG	SR	29.20037550448592
JJ353	cb1r	Emx-DG-cKO	Emx-DG	SO	28.879442726824365
JJ354	cb1r	Emx-DG-cKO	Emx-DG	All	31.005572694310573
JJ354	cb1r	Emx-DG-cKO	Emx-DG	SP	27.93801334695782
JJ354	cb1r	Emx-DG-cKO	Emx-DG	SR	32.0947758023916
JJ354	cb1r	Emx-DG-cKO	Emx-DG	SO	30.47408304061643
JJ355	cb1r	Emx-DG-cKO	Emx-DG	All	30.95205502447234
JJ355	cb1r	Emx-DG-cKO	Emx-DG	SP	28.246771352856204
JJ355	cb1r	Emx-DG-cKO	Emx-DG	SR	32.94016363057675
JJ355	cb1r	Emx-DG-cKO	Emx-DG	SO	29.539611012785198
JJ356	cb1r	Emx-DG-cKO	Emx-DG	All	30.10317745302131
JJ356	cb1r	Emx-DG-cKO	Emx-DG	SP	29.332050544790576
JJ356	cb1r	Emx-DG-cKO	Emx-DG	SR	30.587660599948357
JJ356	cb1r	Emx-DG-cKO	Emx-DG	SO	28.101797285224293
JJ361	cb1r	Emx-DG-Ctrl	Emx-DG	All	35.72406877567703
JJ361	cb1r	Emx-DG-Ctrl	Emx-DG	SP	38.39113984052597
JJ361	cb1r	Emx-DG-Ctrl	Emx-DG	SR	35.72651449255881
JJ361	cb1r	Emx-DG-Ctrl	Emx-DG	SO	30.58635742795614
JJ362	cb1r	Emx-DG-Ctrl	Emx-DG	All	35.272431882218385
JJ362	cb1r	Emx-DG-Ctrl	Emx-DG	SP	37.84651182098917
JJ362	cb1r	Emx-DG-Ctrl	Emx-DG	SR	35.35375152342311
JJ362	cb1r	Emx-DG-Ctrl	Emx-DG	SO	27.89053553131744
JJ363	cb1r	Emx-DG-Ctrl	Emx-DG	All	35.04837754931025
JJ363	cb1r	Emx-DG-Ctrl	Emx-DG	SP	37.59867157834677
JJ363	cb1r	Emx-DG-Ctrl	Emx-DG	SR	34.96455085596837
JJ363	cb1r	Emx-DG-Ctrl	Emx-DG	SO	28.996759275604933
JJ364	cb1r	Emx-DG-Ctrl	Emx-DG	All	35.196614949335085
JJ364	cb1r	Emx-DG-Ctrl	Emx-DG	SP	38.192295475360936
JJ364	cb1r	Emx-DG-Ctrl	Emx-DG	SR	35.20714482100298
JJ364	cb1r	Emx-DG-Ctrl	Emx-DG	SO	28.58802783918229
JJ369	cb1r	Emx-DG-cKO	Emx-DG	All	23.347425094247264
JJ369	cb1r	Emx-DG-cKO	Emx-DG	SP	24.487516090133436
JJ369	cb1r	Emx-DG-cKO	Emx-DG	SR	23.097137885725807
JJ369	cb1r	Emx-DG-cKO	Emx-DG	SO	20.887515104688482
JJ370	cb1r	Emx-DG-cKO	Emx-DG	All	29.838014365242252
JJ370	cb1r	Emx-DG-cKO	Emx-DG	SP	30.795881708765613
JJ370	cb1r	Emx-DG-cKO	Emx-DG	SR	29.7643463113075
JJ370	cb1r	Emx-DG-cKO	Emx-DG	SO	27.53092709583648
JJ372	cb1r	Emx-DG-cKO	Emx-DG	All	23.636407991404642
JJ372	cb1r	Emx-DG-cKO	Emx-DG	SP	24.187439403179134
JJ372	cb1r	Emx-DG-cKO	Emx-DG	SR	23.52883609495647
JJ372	cb1r	Emx-DG-cKO	Emx-DG	SO	21.49936033926572
JJ377	cb1r	Emx-DG-Ctrl	Emx-DG	All	33.890098396579866
JJ377	cb1r	Emx-DG-Ctrl	Emx-DG	SP	38.59940000919807
JJ377	cb1r	Emx-DG-Ctrl	Emx-DG	SR	32.05092142402502
JJ377	cb1r	Emx-DG-Ctrl	Emx-DG	SO	27.464812605578786
JJ378	cb1r	Emx-DG-Ctrl	Emx-DG	All	34.61865808620879
JJ378	cb1r	Emx-DG-Ctrl	Emx-DG	SP	38.66218174057684
JJ378	cb1r	Emx-DG-Ctrl	Emx-DG	SR	33.40228327396645
JJ378	cb1r	Emx-DG-Ctrl	Emx-DG	SO	28.848509875628118
JJ379	cb1r	Emx-DG-Ctrl	Emx-DG	All	33.675648153614254
JJ379	cb1r	Emx-DG-Ctrl	Emx-DG	SP	37.1715383585991
JJ379	cb1r	Emx-DG-Ctrl	Emx-DG	SR	32.5440692112678
JJ379	cb1r	Emx-DG-Ctrl	Emx-DG	SO	28.86839300972986
JJ385	cb1r	Emx-DG-Ctrl	Emx-DG	All	33.74537771085401
JJ385	cb1r	Emx-DG-Ctrl	Emx-DG	SP	37.27395632313927
JJ385	cb1r	Emx-DG-Ctrl	Emx-DG	SR	33.05284981845364
JJ385	cb1r	Emx-DG-Ctrl	Emx-DG	SO	27.498289740729255
JJ386	cb1r	Emx-DG-Ctrl	Emx-DG	All	35.313436981635384
JJ386	cb1r	Emx-DG-Ctrl	Emx-DG	SP	37.94791362819522
JJ386	cb1r	Emx-DG-Ctrl	Emx-DG	SR	34.951234740351765
JJ386	cb1r	Emx-DG-Ctrl	Emx-DG	SO	30.610503171747382
JJ387	cb1r	Emx-DG-Ctrl	Emx-DG	All	33.68096661303993
JJ387	cb1r	Emx-DG-Ctrl	Emx-DG	SP	36.959402691459886
JJ387	cb1r	Emx-DG-Ctrl	Emx-DG	SR	32.93908815204489
JJ387	cb1r	Emx-DG-Ctrl	Emx-DG	SO	28.501697185173317
JJ388	cb1r	Emx-DG-Ctrl	Emx-DG	All	34.79733388392959
JJ388	cb1r	Emx-DG-Ctrl	Emx-DG	SP	38.190831984832236
JJ388	cb1r	Emx-DG-Ctrl	Emx-DG	SR	33.859741877611576
JJ388	cb1r	Emx-DG-Ctrl	Emx-DG	SO	29.83187022131659
JJ025	cb1r	Emx-POMT2-cKO	Emx-POMT2	All	38.43049702686903
JJ025	cb1r	Emx-POMT2-cKO	Emx-POMT2	SP	38.360142485986856
JJ025	cb1r	Emx-POMT2-cKO	Emx-POMT2	SR	37.379830896394296
JJ025	cb1r	Emx-POMT2-cKO	Emx-POMT2	SO	37.92753758044759
JJ026	cb1r	Emx-POMT2-cKO	Emx-POMT2	All	34.32667402592141
JJ026	cb1r	Emx-POMT2-cKO	Emx-POMT2	SP	32.94895067076692
JJ026	cb1r	Emx-POMT2-cKO	Emx-POMT2	SR	34.15808178566767
JJ026	cb1r	Emx-POMT2-cKO	Emx-POMT2	SO	34.08568549742005
JJ027	cb1r	Emx-POMT2-cKO	Emx-POMT2	All	30.477975869252894
JJ027	cb1r	Emx-POMT2-cKO	Emx-POMT2	SP	30.756393709373558
JJ027	cb1r	Emx-POMT2-cKO	Emx-POMT2	SR	29.2840272719129
JJ027	cb1r	Emx-POMT2-cKO	Emx-POMT2	SO	30.154489605012053
JJ028	cb1r	Emx-POMT2-cKO	Emx-POMT2	All	28.34226120205875
JJ028	cb1r	Emx-POMT2-cKO	Emx-POMT2	SP	26.093295374875748
JJ028	cb1r	Emx-POMT2-cKO	Emx-POMT2	SR	26.996336113006862
JJ028	cb1r	Emx-POMT2-cKO	Emx-POMT2	SO	28.992959540088133
JJ029	cb1r	Emx-POMT2-Ctrl	Emx-POMT2	All	35.38411984228767
JJ029	cb1r	Emx-POMT2-Ctrl	Emx-POMT2	SP	37.12156426960932
JJ029	cb1r	Emx-POMT2-Ctrl	Emx-POMT2	SR	35.758658867480655
JJ029	cb1r	Emx-POMT2-Ctrl	Emx-POMT2	SO	29.570887108556484
JJ030	cb1r	Emx-POMT2-Ctrl	Emx-POMT2	All	37.67609535913727
JJ030	cb1r	Emx-POMT2-Ctrl	Emx-POMT2	SP	37.64887720936315
JJ030	cb1r	Emx-POMT2-Ctrl	Emx-POMT2	SR	39.56052560040755
JJ030	cb1r	Emx-POMT2-Ctrl	Emx-POMT2	SO	33.284862764224314
JJ031	cb1r	Emx-POMT2-Ctrl	Emx-POMT2	All	32.48830271892686
JJ031	cb1r	Emx-POMT2-Ctrl	Emx-POMT2	SP	35.18472233081404
JJ031	cb1r	Emx-POMT2-Ctrl	Emx-POMT2	SR	31.269801096282396
JJ031	cb1r	Emx-POMT2-Ctrl	Emx-POMT2	SO	26.439689080112494
JJ032	cb1r	Emx-POMT2-Ctrl	Emx-POMT2	All	41.95242586734729
JJ032	cb1r	Emx-POMT2-Ctrl	Emx-POMT2	SP	43.887491594982315
JJ032	cb1r	Emx-POMT2-Ctrl	Emx-POMT2	SR	41.6566986417586
JJ032	cb1r	Emx-POMT2-Ctrl	Emx-POMT2	SO	36.05902978302677
JJ129	cb1r	Emx-POMT2-cKO	Emx-POMT2	All	31.23468032746253
JJ129	cb1r	Emx-POMT2-cKO	Emx-POMT2	SP	30.138637892141936
JJ129	cb1r	Emx-POMT2-cKO	Emx-POMT2	SR	31.08095866829604
JJ129	cb1r	Emx-POMT2-cKO	Emx-POMT2	SO	31.32203151474704
JJ130	cb1r	Emx-POMT2-cKO	Emx-POMT2	All	31.65242012891929
JJ130	cb1r	Emx-POMT2-cKO	Emx-POMT2	SP	32.06017010461056
JJ130	cb1r	Emx-POMT2-cKO	Emx-POMT2	SR	30.596435914317713
JJ130	cb1r	Emx-POMT2-cKO	Emx-POMT2	SO	31.082638911152607
JJ131	cb1r	Emx-POMT2-cKO	Emx-POMT2	All	27.727418953078047
JJ131	cb1r	Emx-POMT2-cKO	Emx-POMT2	SP	27.690232203858244
JJ131	cb1r	Emx-POMT2-cKO	Emx-POMT2	SR	28.041568565368355
JJ131	cb1r	Emx-POMT2-cKO	Emx-POMT2	SO	25.755775722765513
JJ132	cb1r	Emx-POMT2-cKO	Emx-POMT2	All	27.172464037793077
JJ132	cb1r	Emx-POMT2-cKO	Emx-POMT2	SP	26.916478575564778
JJ132	cb1r	Emx-POMT2-cKO	Emx-POMT2	SR	26.726983799604042
JJ132	cb1r	Emx-POMT2-cKO	Emx-POMT2	SO	26.563478987855188
JJ133	cb1r	Emx-POMT2-Ctrl	Emx-POMT2	All	33.80451118990838
JJ133	cb1r	Emx-POMT2-Ctrl	Emx-POMT2	SP	37.1348934553221
JJ133	cb1r	Emx-POMT2-Ctrl	Emx-POMT2	SR	32.937885721875425
JJ133	cb1r	Emx-POMT2-Ctrl	Emx-POMT2	SO	29.062791826574127
JJ134	cb1r	Emx-POMT2-Ctrl	Emx-POMT2	All	34.9727325752129
JJ134	cb1r	Emx-POMT2-Ctrl	Emx-POMT2	SP	38.053167614535475
JJ134	cb1r	Emx-POMT2-Ctrl	Emx-POMT2	SR	34.936567720338196
JJ134	cb1r	Emx-POMT2-Ctrl	Emx-POMT2	SO	29.048565887829557
JJ135	cb1r	Emx-POMT2-Ctrl	Emx-POMT2	All	32.17016663367886
JJ135	cb1r	Emx-POMT2-Ctrl	Emx-POMT2	SP	35.501850375532975
JJ135	cb1r	Emx-POMT2-Ctrl	Emx-POMT2	SR	31.77343048286573
JJ135	cb1r	Emx-POMT2-Ctrl	Emx-POMT2	SO	26.94681788507018
JJ136	cb1r	Emx-POMT2-Ctrl	Emx-POMT2	All	32.72153276886869
JJ136	cb1r	Emx-POMT2-Ctrl	Emx-POMT2	SP	36.25346632885185
JJ136	cb1r	Emx-POMT2-Ctrl	Emx-POMT2	SR	31.43393211464194
JJ136	cb1r	Emx-POMT2-Ctrl	Emx-POMT2	SO	28.14050978638825
JJ187	cb1r	Emx-POMT2-cKO	Emx-POMT2	All	30.429581311583533
JJ187	cb1r	Emx-POMT2-cKO	Emx-POMT2	SP	29.089648157645044
JJ187	cb1r	Emx-POMT2-cKO	Emx-POMT2	SR	28.955439462902255
JJ187	cb1r	Emx-POMT2-cKO	Emx-POMT2	SO	31.51715371334376
JJ188	cb1r	Emx-POMT2-cKO	Emx-POMT2	All	29.713853010737612
JJ188	cb1r	Emx-POMT2-cKO	Emx-POMT2	SP	27.806215455448434
JJ188	cb1r	Emx-POMT2-cKO	Emx-POMT2	SR	29.550639657320552
JJ188	cb1r	Emx-POMT2-cKO	Emx-POMT2	SO	30.056149018744406
JJ189	cb1r	Emx-POMT2-cKO	Emx-POMT2	All	27.224271267031767
JJ189	cb1r	Emx-POMT2-cKO	Emx-POMT2	SP	23.57044940705215
JJ189	cb1r	Emx-POMT2-cKO	Emx-POMT2	SR	27.759429713552162
JJ189	cb1r	Emx-POMT2-cKO	Emx-POMT2	SO	27.922576788043713
JJ190	cb1r	Emx-POMT2-cKO	Emx-POMT2	All	28.426953598265253
JJ190	cb1r	Emx-POMT2-cKO	Emx-POMT2	SP	26.165458377732456
JJ190	cb1r	Emx-POMT2-cKO	Emx-POMT2	SR	28.645362448932783
JJ190	cb1r	Emx-POMT2-cKO	Emx-POMT2	SO	28.567385530712418
JJ195	cb1r	Emx-POMT2-Ctrl	Emx-POMT2	All	34.79576192953646
JJ195	cb1r	Emx-POMT2-Ctrl	Emx-POMT2	SP	37.62253109794106
JJ195	cb1r	Emx-POMT2-Ctrl	Emx-POMT2	SR	34.32225475465347
JJ195	cb1r	Emx-POMT2-Ctrl	Emx-POMT2	SO	29.20795753867
JJ196	cb1r	Emx-POMT2-Ctrl	Emx-POMT2	All	34.684907197091384
JJ196	cb1r	Emx-POMT2-Ctrl	Emx-POMT2	SP	37.297228958179026
JJ196	cb1r	Emx-POMT2-Ctrl	Emx-POMT2	SR	35.16149198474191
JJ196	cb1r	Emx-POMT2-Ctrl	Emx-POMT2	SO	28.10944375048624
JJ197	cb1r	Emx-POMT2-Ctrl	Emx-POMT2	All	34.53963312915322
JJ197	cb1r	Emx-POMT2-Ctrl	Emx-POMT2	SP	35.77306724196628
JJ197	cb1r	Emx-POMT2-Ctrl	Emx-POMT2	SR	35.09981192583861
JJ197	cb1r	Emx-POMT2-Ctrl	Emx-POMT2	SO	30.06327745457118
JJ198	cb1r	Emx-POMT2-Ctrl	Emx-POMT2	All	33.58962871892502
JJ198	cb1r	Emx-POMT2-Ctrl	Emx-POMT2	SP	35.72434115472073
JJ198	cb1r	Emx-POMT2-Ctrl	Emx-POMT2	SR	34.066582983365016
JJ198	cb1r	Emx-POMT2-Ctrl	Emx-POMT2	SO	27.619825168641107
JJ203	cb1r	Emx-POMT2-Ctrl	Emx-POMT2	All	36.38946236887039
JJ203	cb1r	Emx-POMT2-Ctrl	Emx-POMT2	SP	38.266498784407204
JJ203	cb1r	Emx-POMT2-Ctrl	Emx-POMT2	SR	37.00219629327955
JJ203	cb1r	Emx-POMT2-Ctrl	Emx-POMT2	SO	31.640779875039936
JJ204	cb1r	Emx-POMT2-Ctrl	Emx-POMT2	All	34.84783675073156
JJ204	cb1r	Emx-POMT2-Ctrl	Emx-POMT2	SP	36.47491155493547
JJ204	cb1r	Emx-POMT2-Ctrl	Emx-POMT2	SR	35.89103477949427
JJ204	cb1r	Emx-POMT2-Ctrl	Emx-POMT2	SO	28.187256841548
JJ205	cb1r	Emx-POMT2-Ctrl	Emx-POMT2	All	35.04868910937966
JJ205	cb1r	Emx-POMT2-Ctrl	Emx-POMT2	SP	36.91940450590644
JJ205	cb1r	Emx-POMT2-Ctrl	Emx-POMT2	SR	35.43140191774346
JJ205	cb1r	Emx-POMT2-Ctrl	Emx-POMT2	SO	29.935401216613787
JJ206	cb1r	Emx-POMT2-Ctrl	Emx-POMT2	All	33.48131395821413
JJ206	cb1r	Emx-POMT2-Ctrl	Emx-POMT2	SP	36.183628035454774
JJ206	cb1r	Emx-POMT2-Ctrl	Emx-POMT2	SR	33.21305671214135
JJ206	cb1r	Emx-POMT2-Ctrl	Emx-POMT2	SO	27.573478998130888
JJ053	cb1r	B4GAT1-Mutant	B4GAT1	All	37.40889116476089
JJ053	cb1r	B4GAT1-Mutant	B4GAT1	SP	42.18942487698384
JJ053	cb1r	B4GAT1-Mutant	B4GAT1	SR	35.81117534096069
JJ053	cb1r	B4GAT1-Mutant	B4GAT1	SO	26.848008600759165
JJ054	cb1r	B4GAT1-Mutant	B4GAT1	All	35.81138825665847
JJ054	cb1r	B4GAT1-Mutant	B4GAT1	SP	41.43540486740575
JJ054	cb1r	B4GAT1-Mutant	B4GAT1	SR	32.93985272906783
JJ054	cb1r	B4GAT1-Mutant	B4GAT1	SO	28.900799922627254
JJ055	cb1r	B4GAT1-Mutant	B4GAT1	All	32.88819878991728
JJ055	cb1r	B4GAT1-Mutant	B4GAT1	SP	37.61281461876704
JJ055	cb1r	B4GAT1-Mutant	B4GAT1	SR	29.797390112330042
JJ055	cb1r	B4GAT1-Mutant	B4GAT1	SO	22.20987789406214
JJ056	cb1r	B4GAT1-Mutant	B4GAT1	All	31.319593733933985
JJ056	cb1r	B4GAT1-Mutant	B4GAT1	SP	34.18641952848267
JJ056	cb1r	B4GAT1-Mutant	B4GAT1	SR	31.432974916968803
JJ056	cb1r	B4GAT1-Mutant	B4GAT1	SO	23.275076749027527
JJ057	cb1r	B4GAT1-Ctrl	B4GAT1	All	38.46210975593563
JJ057	cb1r	B4GAT1-Ctrl	B4GAT1	SP	43.51876779997891
JJ057	cb1r	B4GAT1-Ctrl	B4GAT1	SR	36.707158502835696
JJ057	cb1r	B4GAT1-Ctrl	B4GAT1	SO	31.101931090739498
JJ058	cb1r	B4GAT1-Ctrl	B4GAT1	All	40.86530073206239
JJ058	cb1r	B4GAT1-Ctrl	B4GAT1	SP	45.646861044995944
JJ058	cb1r	B4GAT1-Ctrl	B4GAT1	SR	39.856380868131474
JJ058	cb1r	B4GAT1-Ctrl	B4GAT1	SO	32.466803891225666
JJ059	cb1r	B4GAT1-Ctrl	B4GAT1	All	37.33006231110545
JJ059	cb1r	B4GAT1-Ctrl	B4GAT1	SP	43.17262099954352
JJ059	cb1r	B4GAT1-Ctrl	B4GAT1	SR	35.106301762094795
JJ059	cb1r	B4GAT1-Ctrl	B4GAT1	SO	28.909126082238636
JJ060	cb1r	B4GAT1-Ctrl	B4GAT1	All	40.07266411386081
JJ060	cb1r	B4GAT1-Ctrl	B4GAT1	SP	44.71276317147099
JJ060	cb1r	B4GAT1-Ctrl	B4GAT1	SR	39.4810123096853
JJ060	cb1r	B4GAT1-Ctrl	B4GAT1	SO	31.152430181239584
JJ077	cb1r	B4GAT1-Mutant	B4GAT1	All	31.40620644648642
JJ077	cb1r	B4GAT1-Mutant	B4GAT1	SP	35.12265914044152
JJ077	cb1r	B4GAT1-Mutant	B4GAT1	SR	30.403826066608797
JJ077	cb1r	B4GAT1-Mutant	B4GAT1	SO	23.56923171081142
JJ078	cb1r	B4GAT1-Mutant	B4GAT1	All	32.67620295755884
JJ078	cb1r	B4GAT1-Mutant	B4GAT1	SP	34.87490613287872
JJ078	cb1r	B4GAT1-Mutant	B4GAT1	SR	32.771217056336354
JJ078	cb1r	B4GAT1-Mutant	B4GAT1	SO	25.89356836944285
JJ079	cb1r	B4GAT1-Mutant	B4GAT1	All	30.68013351711705
JJ079	cb1r	B4GAT1-Mutant	B4GAT1	SP	33.54932573719199
JJ079	cb1r	B4GAT1-Mutant	B4GAT1	SR	29.715380647807713
JJ079	cb1r	B4GAT1-Mutant	B4GAT1	SO	24.48119108483438
JJ080	cb1r	B4GAT1-Mutant	B4GAT1	All	30.41516063129371
JJ080	cb1r	B4GAT1-Mutant	B4GAT1	SP	33.55706085910825
JJ080	cb1r	B4GAT1-Mutant	B4GAT1	SR	30.166781436126
JJ080	cb1r	B4GAT1-Mutant	B4GAT1	SO	21.45495373843037
JJ085	cb1r	B4GAT1-Mutant	B4GAT1	All	35.195898289677764
JJ085	cb1r	B4GAT1-Mutant	B4GAT1	SP	38.60278227127153
JJ085	cb1r	B4GAT1-Mutant	B4GAT1	SR	35.269960614358794
JJ085	cb1r	B4GAT1-Mutant	B4GAT1	SO	25.050986785191927
JJ086	cb1r	B4GAT1-Mutant	B4GAT1	All	34.617079503592024
JJ086	cb1r	B4GAT1-Mutant	B4GAT1	SP	37.808607046836606
JJ086	cb1r	B4GAT1-Mutant	B4GAT1	SR	34.986584936814616
JJ086	cb1r	B4GAT1-Mutant	B4GAT1	SO	27.759309383951514
JJ087	cb1r	B4GAT1-Mutant	B4GAT1	All	34.104776188083235
JJ087	cb1r	B4GAT1-Mutant	B4GAT1	SP	37.35889694534626
JJ087	cb1r	B4GAT1-Mutant	B4GAT1	SR	33.415791659273246
JJ087	cb1r	B4GAT1-Mutant	B4GAT1	SO	26.38631723847338
JJ088	cb1r	B4GAT1-Mutant	B4GAT1	All	34.61321452467859
JJ088	cb1r	B4GAT1-Mutant	B4GAT1	SP	37.936484394289145
JJ088	cb1r	B4GAT1-Mutant	B4GAT1	SR	34.37490152187253
JJ088	cb1r	B4GAT1-Mutant	B4GAT1	SO	28.455924146816475
JJ093	cb1r	B4GAT1-Ctrl	B4GAT1	All	39.59297050762597
JJ093	cb1r	B4GAT1-Ctrl	B4GAT1	SP	44.185147603649774
JJ093	cb1r	B4GAT1-Ctrl	B4GAT1	SR	39.639669677849945
JJ093	cb1r	B4GAT1-Ctrl	B4GAT1	SO	30.5531804645631
JJ094	cb1r	B4GAT1-Ctrl	B4GAT1	All	39.65038672398174
JJ094	cb1r	B4GAT1-Ctrl	B4GAT1	SP	44.20810438676699
JJ094	cb1r	B4GAT1-Ctrl	B4GAT1	SR	37.90240202555035
JJ094	cb1r	B4GAT1-Ctrl	B4GAT1	SO	32.47397913627042
JJ095	cb1r	B4GAT1-Ctrl	B4GAT1	All	40.044428574899676
JJ095	cb1r	B4GAT1-Ctrl	B4GAT1	SP	44.135456320669434
JJ095	cb1r	B4GAT1-Ctrl	B4GAT1	SR	40.14277046064056
JJ095	cb1r	B4GAT1-Ctrl	B4GAT1	SO	31.668280749954786
JJ096	cb1r	B4GAT1-Ctrl	B4GAT1	All	38.38390618077256
JJ096	cb1r	B4GAT1-Ctrl	B4GAT1	SP	42.38355446020158
JJ096	cb1r	B4GAT1-Ctrl	B4GAT1	SR	38.147766062600056
JJ096	cb1r	B4GAT1-Ctrl	B4GAT1	SO	30.10717106866004
JJ101	cb1r	B4GAT1-Ctrl	B4GAT1	All	36.70682385183443
JJ101	cb1r	B4GAT1-Ctrl	B4GAT1	SP	39.59954247322743
JJ101	cb1r	B4GAT1-Ctrl	B4GAT1	SR	37.08339729311352
JJ101	cb1r	B4GAT1-Ctrl	B4GAT1	SO	29.836408920241084
JJ102	cb1r	B4GAT1-Ctrl	B4GAT1	All	37.35332191127733
JJ102	cb1r	B4GAT1-Ctrl	B4GAT1	SP	40.09351842411744
JJ102	cb1r	B4GAT1-Ctrl	B4GAT1	SR	37.29141174436029
JJ102	cb1r	B4GAT1-Ctrl	B4GAT1	SO	31.873276819074174
JJ103	cb1r	B4GAT1-Ctrl	B4GAT1	All	34.75140539111741
JJ103	cb1r	B4GAT1-Ctrl	B4GAT1	SP	37.79765549915128
JJ103	cb1r	B4GAT1-Ctrl	B4GAT1	SR	35.199779865453465
JJ103	cb1r	B4GAT1-Ctrl	B4GAT1	SO	28.467960009590467
JJ104	cb1r	B4GAT1-Ctrl	B4GAT1	All	34.80017849429726
JJ104	cb1r	B4GAT1-Ctrl	B4GAT1	SP	38.09532643488094
JJ104	cb1r	B4GAT1-Ctrl	B4GAT1	SR	35.13253026790286
JJ104	cb1r	B4GAT1-Ctrl	B4GAT1	SO	27.83729158234153
JJ238	cb1r	FKRP-Mutant	FKRP	All	29.310037645679195
JJ238	cb1r	FKRP-Mutant	FKRP	SP	31.446534182866696
JJ238	cb1r	FKRP-Mutant	FKRP	SR	29.21309518175302
JJ238	cb1r	FKRP-Mutant	FKRP	SO	23.713379316736958
JJ239	cb1r	FKRP-Mutant	FKRP	All	29.98153868854862
JJ239	cb1r	FKRP-Mutant	FKRP	SP	32.00079283108266
JJ239	cb1r	FKRP-Mutant	FKRP	SR	30.571761211187056
JJ239	cb1r	FKRP-Mutant	FKRP	SO	23.372313990348868
JJ240	cb1r	FKRP-Mutant	FKRP	All	29.660895467737188
JJ240	cb1r	FKRP-Mutant	FKRP	SP	31.648443750064178
JJ240	cb1r	FKRP-Mutant	FKRP	SR	29.37549186189929
JJ240	cb1r	FKRP-Mutant	FKRP	SO	24.710828046657163
JJ241	cb1r	FKRP-Mutant	FKRP	All	29.590932236695416
JJ241	cb1r	FKRP-Mutant	FKRP	SP	31.752080102920917
JJ241	cb1r	FKRP-Mutant	FKRP	SR	30.105313897978533
JJ241	cb1r	FKRP-Mutant	FKRP	SO	23.933465115046495
JJ246	cb1r	FKRP-Ctrl	FKRP	All	33.595023582344595
JJ246	cb1r	FKRP-Ctrl	FKRP	SP	35.94996614748011
JJ246	cb1r	FKRP-Ctrl	FKRP	SR	33.38425715237265
JJ246	cb1r	FKRP-Ctrl	FKRP	SO	29.530538208212054
JJ247	cb1r	FKRP-Ctrl	FKRP	All	33.60819807611033
JJ247	cb1r	FKRP-Ctrl	FKRP	SP	36.69965453116002
JJ247	cb1r	FKRP-Ctrl	FKRP	SR	27.995848061879
JJ247	cb1r	FKRP-Ctrl	FKRP	SO	33.80296670142845
JJ248	cb1r	FKRP-Ctrl	FKRP	All	29.975777396949752
JJ248	cb1r	FKRP-Ctrl	FKRP	SP	33.128964000858375
JJ248	cb1r	FKRP-Ctrl	FKRP	SR	29.56688337420232
JJ248	cb1r	FKRP-Ctrl	FKRP	SO	25.250362956827605
JJ249	cb1r	FKRP-Ctrl	FKRP	All	32.20241145907601
JJ249	cb1r	FKRP-Ctrl	FKRP	SP	35.200717812011284
JJ249	cb1r	FKRP-Ctrl	FKRP	SR	31.45610821055564
JJ249	cb1r	FKRP-Ctrl	FKRP	SO	27.53730823223834
JJ254	cb1r	FKRP-Mutant	FKRP	All	31.331520025216403
JJ254	cb1r	FKRP-Mutant	FKRP	SP	33.473241809601475
JJ254	cb1r	FKRP-Mutant	FKRP	SR	31.94896296054922
JJ254	cb1r	FKRP-Mutant	FKRP	SO	24.927977719809586
JJ255	cb1r	FKRP-Mutant	FKRP	All	31.883635737502484
JJ255	cb1r	FKRP-Mutant	FKRP	SP	34.51791970867342
JJ255	cb1r	FKRP-Mutant	FKRP	SR	32.195577354764175
JJ255	cb1r	FKRP-Mutant	FKRP	SO	25.501676420762397
JJ256	cb1r	FKRP-Mutant	FKRP	All	30.836488374549017
JJ256	cb1r	FKRP-Mutant	FKRP	SP	33.82221923948395
JJ256	cb1r	FKRP-Mutant	FKRP	SR	30.682340537945983
JJ256	cb1r	FKRP-Mutant	FKRP	SO	24.994567585909532
JJ257	cb1r	FKRP-Mutant	FKRP	All	29.615077310192753
JJ257	cb1r	FKRP-Mutant	FKRP	SP	32.920978998240116
JJ257	cb1r	FKRP-Mutant	FKRP	SR	28.918395689895608
JJ257	cb1r	FKRP-Mutant	FKRP	SO	23.158508164275787
JJ262	cb1r	FKRP-Ctrl	FKRP	All	32.80820164415512
JJ262	cb1r	FKRP-Ctrl	FKRP	SP	35.91702834642293
JJ262	cb1r	FKRP-Ctrl	FKRP	SR	32.71912138565801
JJ262	cb1r	FKRP-Ctrl	FKRP	SO	26.139986762702502
JJ263	cb1r	FKRP-Ctrl	FKRP	All	32.084228056433616
JJ263	cb1r	FKRP-Ctrl	FKRP	SP	35.38665529230558
JJ263	cb1r	FKRP-Ctrl	FKRP	SR	31.558936361298073
JJ263	cb1r	FKRP-Ctrl	FKRP	SO	26.1040494152842
JJ264	cb1r	FKRP-Ctrl	FKRP	All	30.58987613121146
JJ264	cb1r	FKRP-Ctrl	FKRP	SP	34.905289721829334
JJ264	cb1r	FKRP-Ctrl	FKRP	SR	29.327473373621658
JJ264	cb1r	FKRP-Ctrl	FKRP	SO	24.045056896453364
JJ265	cb1r	FKRP-Ctrl	FKRP	All	33.120444686035725
JJ265	cb1r	FKRP-Ctrl	FKRP	SP	36.57636900126616
JJ265	cb1r	FKRP-Ctrl	FKRP	SR	32.86888756902856
JJ265	cb1r	FKRP-Ctrl	FKRP	SO	26.70844354224897
JJ326	cb1r	FKRP-Mutant	FKRP	All	36.91412467367141
JJ326	cb1r	FKRP-Mutant	FKRP	SP	39.486285731629955
JJ326	cb1r	FKRP-Mutant	FKRP	SR	37.212708774977585
JJ326	cb1r	FKRP-Mutant	FKRP	SO	30.920776374765843
JJ327	cb1r	FKRP-Mutant	FKRP	All	36.26783160643637
JJ327	cb1r	FKRP-Mutant	FKRP	SP	38.853009767530004
JJ327	cb1r	FKRP-Mutant	FKRP	SR	37.321363919983085
JJ327	cb1r	FKRP-Mutant	FKRP	SO	28.571056154534695
JJ328	cb1r	FKRP-Mutant	FKRP	All	35.83905953254956
JJ328	cb1r	FKRP-Mutant	FKRP	SP	37.97448525248637
JJ328	cb1r	FKRP-Mutant	FKRP	SR	36.83172469668602
JJ328	cb1r	FKRP-Mutant	FKRP	SO	29.836212503950513
JJ329	cb1r	FKRP-Mutant	FKRP	All	36.33969984322012
JJ329	cb1r	FKRP-Mutant	FKRP	SP	38.47942733422454
JJ329	cb1r	FKRP-Mutant	FKRP	SR	37.72858317978045
JJ329	cb1r	FKRP-Mutant	FKRP	SO	28.487895942480673
JJ330	cb1r	FKRP-Ctrl	FKRP	All	38.181688370790035
JJ330	cb1r	FKRP-Ctrl	FKRP	SP	40.57311279966562
JJ330	cb1r	FKRP-Ctrl	FKRP	SR	38.65495434792607
JJ330	cb1r	FKRP-Ctrl	FKRP	SO	33.42996516241177
JJ331	cb1r	FKRP-Ctrl	FKRP	All	39.24131220459617
JJ331	cb1r	FKRP-Ctrl	FKRP	SP	41.333997415683925
JJ331	cb1r	FKRP-Ctrl	FKRP	SR	39.97123772379913
JJ331	cb1r	FKRP-Ctrl	FKRP	SO	33.78743931575733
JJ332	cb1r	FKRP-Ctrl	FKRP	All	37.683881881798634
JJ332	cb1r	FKRP-Ctrl	FKRP	SP	40.522194744848505
JJ332	cb1r	FKRP-Ctrl	FKRP	SR	37.96688074488923
JJ332	cb1r	FKRP-Ctrl	FKRP	SO	31.871057281189064
JJ333	cb1r	FKRP-Ctrl	FKRP	All	37.828685067334696
JJ333	cb1r	FKRP-Ctrl	FKRP	SP	40.86143873202409
JJ333	cb1r	FKRP-Ctrl	FKRP	SR	38.339442900217676
JJ333	cb1r	FKRP-Ctrl	FKRP	SO	31.160395334968804
JJ266	cb1r	ICD-Mutant	ICD	All	35.07567929574943
JJ266	cb1r	ICD-Mutant	ICD	SP	37.263050685025355
JJ266	cb1r	ICD-Mutant	ICD	SR	33.00202820660954
JJ266	cb1r	ICD-Mutant	ICD	SO	34.2500169194826
JJ267	cb1r	ICD-Mutant	ICD	All	33.72096074929285
JJ267	cb1r	ICD-Mutant	ICD	SP	34.9792583625274
JJ267	cb1r	ICD-Mutant	ICD	SR	33.802235730642195
JJ267	cb1r	ICD-Mutant	ICD	SO	31.286954753722284
JJ268	cb1r	ICD-Mutant	ICD	All	30.973470319589595
JJ268	cb1r	ICD-Mutant	ICD	SP	33.03613198787138
JJ268	cb1r	ICD-Mutant	ICD	SR	30.041605160940524
JJ268	cb1r	ICD-Mutant	ICD	SO	28.807972181798817
JJ269	cb1r	ICD-Mutant	ICD	All	33.88015780196068
JJ269	cb1r	ICD-Mutant	ICD	SP	35.314680721059695
JJ269	cb1r	ICD-Mutant	ICD	SR	33.37329565211632
JJ269	cb1r	ICD-Mutant	ICD	SO	32.016827708017225
JJ274	cb1r	ICD-Ctrl	ICD	All	33.476920665949244
JJ274	cb1r	ICD-Ctrl	ICD	SP	35.87682164095154
JJ274	cb1r	ICD-Ctrl	ICD	SR	33.586162012990705
JJ274	cb1r	ICD-Ctrl	ICD	SO	27.557556056692356
JJ275	cb1r	ICD-Ctrl	ICD	All	34.76249630804044
JJ275	cb1r	ICD-Ctrl	ICD	SP	35.9187203282334
JJ275	cb1r	ICD-Ctrl	ICD	SR	35.70879080045381
JJ275	cb1r	ICD-Ctrl	ICD	SO	30.401167179365814
JJ276	cb1r	ICD-Ctrl	ICD	All	34.250067045727114
JJ276	cb1r	ICD-Ctrl	ICD	SP	36.63966849668887
JJ276	cb1r	ICD-Ctrl	ICD	SR	33.674260990971966
JJ276	cb1r	ICD-Ctrl	ICD	SO	29.456108625240205
JJ277	cb1r	ICD-Ctrl	ICD	All	34.52728582357252
JJ277	cb1r	ICD-Ctrl	ICD	SP	36.22927562770946
JJ277	cb1r	ICD-Ctrl	ICD	SR	35.40619314368757
JJ277	cb1r	ICD-Ctrl	ICD	SO	28.626278279277642
JJ298	cb1r	ICD-Mutant	ICD	All	37.4973493778229
JJ298	cb1r	ICD-Mutant	ICD	SP	37.42736378389588
JJ298	cb1r	ICD-Mutant	ICD	SR	37.946652700010645
JJ298	cb1r	ICD-Mutant	ICD	SO	36.133184163229416
JJ299	cb1r	ICD-Mutant	ICD	All	38.6301104491344
JJ299	cb1r	ICD-Mutant	ICD	SP	38.21592249083575
JJ299	cb1r	ICD-Mutant	ICD	SR	39.2867418627295
JJ299	cb1r	ICD-Mutant	ICD	SO	37.53608276162313
JJ300	cb1r	ICD-Mutant	ICD	All	38.485264062843044
JJ300	cb1r	ICD-Mutant	ICD	SP	38.44538832107949
JJ300	cb1r	ICD-Mutant	ICD	SR	39.02634617845957
JJ300	cb1r	ICD-Mutant	ICD	SO	37.08387728097815
JJ301	cb1r	ICD-Mutant	ICD	All	37.67151957617321
JJ301	cb1r	ICD-Mutant	ICD	SP	37.67603940028679
JJ301	cb1r	ICD-Mutant	ICD	SR	38.643167377821044
JJ301	cb1r	ICD-Mutant	ICD	SO	35.768489427755796
JJ306	cb1r	ICD-Mutant	ICD	All	40.38417114364132
JJ306	cb1r	ICD-Mutant	ICD	SP	40.0532474901489
JJ306	cb1r	ICD-Mutant	ICD	SR	40.69029051546565
JJ306	cb1r	ICD-Mutant	ICD	SO	39.43916181436118
JJ307	cb1r	ICD-Mutant	ICD	All	39.68864585047977
JJ307	cb1r	ICD-Mutant	ICD	SP	39.164872731987366
JJ307	cb1r	ICD-Mutant	ICD	SR	40.29884076612187
JJ307	cb1r	ICD-Mutant	ICD	SO	38.692728111315795
JJ308	cb1r	ICD-Mutant	ICD	All	38.349457090090056
JJ308	cb1r	ICD-Mutant	ICD	SP	38.68884711328571
JJ308	cb1r	ICD-Mutant	ICD	SR	38.590940647672014
JJ308	cb1r	ICD-Mutant	ICD	SO	36.94917823206765
JJ309	cb1r	ICD-Mutant	ICD	All	37.96532532194238
JJ309	cb1r	ICD-Mutant	ICD	SP	38.64875515047643
JJ309	cb1r	ICD-Mutant	ICD	SR	38.61351185863325
JJ309	cb1r	ICD-Mutant	ICD	SO	35.91784345094939
JJ314	cb1r	ICD-Ctrl	ICD	All	37.023224184854364
JJ314	cb1r	ICD-Ctrl	ICD	SP	38.233798171140684
JJ314	cb1r	ICD-Ctrl	ICD	SR	37.83906222243655
JJ314	cb1r	ICD-Ctrl	ICD	SO	32.48923819277987
JJ315	cb1r	ICD-Ctrl	ICD	All	37.25238444540008
JJ315	cb1r	ICD-Ctrl	ICD	SP	38.54643787164586
JJ315	cb1r	ICD-Ctrl	ICD	SR	38.54361121358782
JJ315	cb1r	ICD-Ctrl	ICD	SO	31.043277096087433
JJ316	cb1r	ICD-Ctrl	ICD	All	35.48206745576039
JJ316	cb1r	ICD-Ctrl	ICD	SP	37.152951543208076
JJ316	cb1r	ICD-Ctrl	ICD	SR	36.036629529068335
JJ316	cb1r	ICD-Ctrl	ICD	SO	30.786329118013064
JJ317	cb1r	ICD-Ctrl	ICD	All	35.73936414824517
JJ317	cb1r	ICD-Ctrl	ICD	SP	37.320260917997295
JJ317	cb1r	ICD-Ctrl	ICD	SR	36.239644638170354
JJ317	cb1r	ICD-Ctrl	ICD	SO	30.368070538291647
JJ322	cb1r	ICD-Ctrl	ICD	All	35.63944639186053
JJ322	cb1r	ICD-Ctrl	ICD	SP	37.13458660019655
JJ322	cb1r	ICD-Ctrl	ICD	SR	35.87682601821845
JJ322	cb1r	ICD-Ctrl	ICD	SO	32.1373625559317
JJ323	cb1r	ICD-Ctrl	ICD	All	37.14123010494922
JJ323	cb1r	ICD-Ctrl	ICD	SP	39.439929977707585
JJ323	cb1r	ICD-Ctrl	ICD	SR	37.11794460745206
JJ323	cb1r	ICD-Ctrl	ICD	SO	32.640105761850364
JJ324	cb1r	ICD-Ctrl	ICD	All	35.18611519848073
JJ324	cb1r	ICD-Ctrl	ICD	SP	37.529162238155664
JJ324	cb1r	ICD-Ctrl	ICD	SR	35.0642370234698
JJ324	cb1r	ICD-Ctrl	ICD	SO	31.09710192657498
JJ325	cb1r	ICD-Ctrl	ICD	All	35.180353869613505
JJ325	cb1r	ICD-Ctrl	ICD	SP	37.978919583512095
JJ325	cb1r	ICD-Ctrl	ICD	SR	35.578877788818225
JJ325	cb1r	ICD-Ctrl	ICD	SO	28.633147351704306
