# Supplementary material for: Inhibitory CCK+ basket synapse defects in mouse models of dystroglycanopathy
Source: eLife. 2024 Jan 5;12:RP87965. doi: 10.7554/eLife.87965 (PMC10942650; doi:10.7554/eLife.87965)
Supplement: Figure 5—source data 2. [file elife-87965-fig5-data2.csv]

Image	Markers	Region	Condition	PctColoc	Experiment
JJ111	cb1r-vgat	all	Emx-DG-cKO	58.58156028368794	Emx-DG
JJ111	cb1r-vgat	sp	Emx-DG-cKO	64.8786717752235	Emx-DG
JJ111	cb1r-vgat	so	Emx-DG-cKO	55.13565891472868	Emx-DG
JJ111	cb1r-vgat	sr	Emx-DG-cKO	56.71641791044776	Emx-DG
JJ112	cb1r-vgat	all	Emx-DG-cKO	63.59020310633214	Emx-DG
JJ112	cb1r-vgat	sp	Emx-DG-cKO	71.06045589692765	Emx-DG
JJ112	cb1r-vgat	so	Emx-DG-cKO	61.04491292392301	Emx-DG
JJ112	cb1r-vgat	sr	Emx-DG-cKO	58.97435897435897	Emx-DG
JJ113	cb1r-vgat	all	Emx-DG-cKO	62.557781201849	Emx-DG
JJ113	cb1r-vgat	sp	Emx-DG-cKO	69.72477064220183	Emx-DG
JJ113	cb1r-vgat	so	Emx-DG-cKO	57.4739281575898	Emx-DG
JJ113	cb1r-vgat	sr	Emx-DG-cKO	61.03092783505155	Emx-DG
JJ114	cb1r-vgat	all	Emx-DG-cKO	72.44389027431421	Emx-DG
JJ114	cb1r-vgat	sp	Emx-DG-cKO	72.95597484276729	Emx-DG
JJ114	cb1r-vgat	so	Emx-DG-cKO	69.67213114754098	Emx-DG
JJ114	cb1r-vgat	sr	Emx-DG-cKO	73.45559845559846	Emx-DG
JJ115	cb1r-vgat	all	Emx-DG-cKO	61.27372145384368	Emx-DG
JJ115	cb1r-vgat	sp	Emx-DG-cKO	69.04176904176904	Emx-DG
JJ115	cb1r-vgat	so	Emx-DG-cKO	57.711950970377934	Emx-DG
JJ115	cb1r-vgat	sr	Emx-DG-cKO	58.81458966565349	Emx-DG
JJ121	cb1r-vgat	all	Emx-DG-Ctrl	75.27075812274369	Emx-DG
JJ121	cb1r-vgat	sp	Emx-DG-Ctrl	80.11722272317402	Emx-DG
JJ121	cb1r-vgat	so	Emx-DG-Ctrl	68.0428134556575	Emx-DG
JJ121	cb1r-vgat	sr	Emx-DG-Ctrl	70.76923076923077	Emx-DG
JJ122	cb1r-vgat	all	Emx-DG-Ctrl	68.82854578096948	Emx-DG
JJ122	cb1r-vgat	sp	Emx-DG-Ctrl	76.16438356164383	Emx-DG
JJ122	cb1r-vgat	so	Emx-DG-Ctrl	57.006802721088434	Emx-DG
JJ122	cb1r-vgat	sr	Emx-DG-Ctrl	62.965382103200525	Emx-DG
JJ123	cb1r-vgat	all	Emx-DG-Ctrl	65.08956386292834	Emx-DG
JJ123	cb1r-vgat	sp	Emx-DG-Ctrl	73.0082085948817	Emx-DG
JJ123	cb1r-vgat	so	Emx-DG-Ctrl	60.22530329289428	Emx-DG
JJ123	cb1r-vgat	sr	Emx-DG-Ctrl	58.555729984301415	Emx-DG
JJ124	cb1r-vgat	all	Emx-DG-Ctrl	60.750333269853364	Emx-DG
JJ124	cb1r-vgat	sp	Emx-DG-Ctrl	71.31782945736434	Emx-DG
JJ124	cb1r-vgat	so	Emx-DG-Ctrl	49.77293369663942	Emx-DG
JJ124	cb1r-vgat	sr	Emx-DG-Ctrl	54.331112250128136	Emx-DG
JJ345	cb1r-vgat	all	Emx-DG-cKO	50.986342943854325	Emx-DG
JJ345	cb1r-vgat	sp	Emx-DG-cKO	53.79746835443038	Emx-DG
JJ345	cb1r-vgat	so	Emx-DG-cKO	48.442622950819676	Emx-DG
JJ345	cb1r-vgat	sr	Emx-DG-cKO	50.89585666293393	Emx-DG
JJ346	cb1r-vgat	all	Emx-DG-cKO	53.80333951762523	Emx-DG
JJ346	cb1r-vgat	sp	Emx-DG-cKO	59.36293436293436	Emx-DG
JJ346	cb1r-vgat	so	Emx-DG-cKO	52.75267050123254	Emx-DG
JJ346	cb1r-vgat	sr	Emx-DG-cKO	50.49439683586025	Emx-DG
JJ347	cb1r-vgat	all	Emx-DG-cKO	47.30707395498392	Emx-DG
JJ347	cb1r-vgat	sp	Emx-DG-cKO	54.464285714285715	Emx-DG
JJ347	cb1r-vgat	so	Emx-DG-cKO	40.43607532210109	Emx-DG
JJ347	cb1r-vgat	sr	Emx-DG-cKO	49.40152339499456	Emx-DG
JJ348	cb1r-vgat	all	Emx-DG-cKO	47.238031469702044	Emx-DG
JJ348	cb1r-vgat	sp	Emx-DG-cKO	53.67913148371532	Emx-DG
JJ348	cb1r-vgat	so	Emx-DG-cKO	41.94722474977252	Emx-DG
JJ348	cb1r-vgat	sr	Emx-DG-cKO	46.90873405299313	Emx-DG
JJ353	cb1r-vgat	all	Emx-DG-cKO	48.551191242755955	Emx-DG
JJ353	cb1r-vgat	sp	Emx-DG-cKO	48.69831546707504	Emx-DG
JJ353	cb1r-vgat	so	Emx-DG-cKO	45.41446208112875	Emx-DG
JJ353	cb1r-vgat	sr	Emx-DG-cKO	50.87187263078089	Emx-DG
JJ354	cb1r-vgat	all	Emx-DG-cKO	49.88003199146894	Emx-DG
JJ354	cb1r-vgat	sp	Emx-DG-cKO	56.8671963677639	Emx-DG
JJ354	cb1r-vgat	so	Emx-DG-cKO	48.753894080996886	Emx-DG
JJ354	cb1r-vgat	sr	Emx-DG-cKO	46.406052963430014	Emx-DG
JJ355	cb1r-vgat	all	Emx-DG-cKO	45.384231536926144	Emx-DG
JJ355	cb1r-vgat	sp	Emx-DG-cKO	50.94170403587444	Emx-DG
JJ355	cb1r-vgat	so	Emx-DG-cKO	39.74255832662912	Emx-DG
JJ355	cb1r-vgat	sr	Emx-DG-cKO	45.09090909090909	Emx-DG
JJ356	cb1r-vgat	all	Emx-DG-cKO	51.0548523206751	Emx-DG
JJ356	cb1r-vgat	sp	Emx-DG-cKO	56.777996070726914	Emx-DG
JJ356	cb1r-vgat	so	Emx-DG-cKO	45.23135033050047	Emx-DG
JJ356	cb1r-vgat	sr	Emx-DG-cKO	50.81190798376184	Emx-DG
JJ361	cb1r-vgat	all	Emx-DG-Ctrl	52.458530805687204	Emx-DG
JJ361	cb1r-vgat	sp	Emx-DG-Ctrl	61.32767271323813	Emx-DG
JJ361	cb1r-vgat	so	Emx-DG-Ctrl	47.075017205781144	Emx-DG
JJ361	cb1r-vgat	sr	Emx-DG-Ctrl	46.49187592319055	Emx-DG
JJ362	cb1r-vgat	all	Emx-DG-Ctrl	52.06624605678233	Emx-DG
JJ362	cb1r-vgat	sp	Emx-DG-Ctrl	59.78013646702047	Emx-DG
JJ362	cb1r-vgat	so	Emx-DG-Ctrl	44.173441734417345	Emx-DG
JJ362	cb1r-vgat	sr	Emx-DG-Ctrl	47.052023121387286	Emx-DG
JJ363	cb1r-vgat	all	Emx-DG-Ctrl	56.56836461126005	Emx-DG
JJ363	cb1r-vgat	sp	Emx-DG-Ctrl	65.01163692785104	Emx-DG
JJ363	cb1r-vgat	so	Emx-DG-Ctrl	46.33529907329402	Emx-DG
JJ363	cb1r-vgat	sr	Emx-DG-Ctrl	51.96116504854369	Emx-DG
JJ364	cb1r-vgat	all	Emx-DG-Ctrl	56.09834484975092	Emx-DG
JJ364	cb1r-vgat	sp	Emx-DG-Ctrl	63.447725458898645	Emx-DG
JJ364	cb1r-vgat	so	Emx-DG-Ctrl	50.50675675675676	Emx-DG
JJ364	cb1r-vgat	sr	Emx-DG-Ctrl	50.848795894196606	Emx-DG
JJ369	cb1r-vgat	all	Emx-DG-cKO	45.77062791904515	Emx-DG
JJ369	cb1r-vgat	sp	Emx-DG-cKO	46.478873239436616	Emx-DG
JJ369	cb1r-vgat	so	Emx-DG-cKO	41.732283464566926	Emx-DG
JJ369	cb1r-vgat	sr	Emx-DG-cKO	47.95486600846262	Emx-DG
JJ370	cb1r-vgat	all	Emx-DG-cKO	43.17023445463813	Emx-DG
JJ370	cb1r-vgat	sp	Emx-DG-cKO	47.294292068198665	Emx-DG
JJ370	cb1r-vgat	so	Emx-DG-cKO	37.90720631786772	Emx-DG
JJ370	cb1r-vgat	sr	Emx-DG-cKO	42.51766217084136	Emx-DG
JJ372	cb1r-vgat	all	Emx-DG-cKO	50.45827303424988	Emx-DG
JJ372	cb1r-vgat	sp	Emx-DG-cKO	52.41379310344828	Emx-DG
JJ372	cb1r-vgat	so	Emx-DG-cKO	49.75922953451043	Emx-DG
JJ372	cb1r-vgat	sr	Emx-DG-cKO	48.55172413793103	Emx-DG
JJ377	cb1r-vgat	all	Emx-DG-Ctrl	62.310344827586206	Emx-DG
JJ377	cb1r-vgat	sp	Emx-DG-Ctrl	67.18512898330805	Emx-DG
JJ377	cb1r-vgat	so	Emx-DG-Ctrl	53.88556789069172	Emx-DG
JJ377	cb1r-vgat	sr	Emx-DG-Ctrl	59.75915704967386	Emx-DG
JJ378	cb1r-vgat	all	Emx-DG-Ctrl	57.88193318196562	Emx-DG
JJ378	cb1r-vgat	sp	Emx-DG-Ctrl	63.78316032295271	Emx-DG
JJ378	cb1r-vgat	so	Emx-DG-Ctrl	47.1107544141252	Emx-DG
JJ378	cb1r-vgat	sr	Emx-DG-Ctrl	56.57611039241052	Emx-DG
JJ379	cb1r-vgat	all	Emx-DG-Ctrl	55.672870436649966	Emx-DG
JJ379	cb1r-vgat	sp	Emx-DG-Ctrl	61.70858629661752	Emx-DG
JJ379	cb1r-vgat	so	Emx-DG-Ctrl	48.157051282051285	Emx-DG
JJ379	cb1r-vgat	sr	Emx-DG-Ctrl	52.45821042281219	Emx-DG
JJ385	cb1r-vgat	all	Emx-DG-Ctrl	51.5304217991788	Emx-DG
JJ385	cb1r-vgat	sp	Emx-DG-Ctrl	59.269406392694066	Emx-DG
JJ385	cb1r-vgat	so	Emx-DG-Ctrl	42.94541709577755	Emx-DG
JJ385	cb1r-vgat	sr	Emx-DG-Ctrl	46.88211197086937	Emx-DG
JJ386	cb1r-vgat	all	Emx-DG-Ctrl	53.54531001589825	Emx-DG
JJ386	cb1r-vgat	sp	Emx-DG-Ctrl	62.16768916155419	Emx-DG
JJ386	cb1r-vgat	so	Emx-DG-Ctrl	46.7008797653959	Emx-DG
JJ386	cb1r-vgat	sr	Emx-DG-Ctrl	48.32728738411931	Emx-DG
JJ387	cb1r-vgat	all	Emx-DG-Ctrl	50.036218761318366	Emx-DG
JJ387	cb1r-vgat	sp	Emx-DG-Ctrl	58.531222515391384	Emx-DG
JJ387	cb1r-vgat	so	Emx-DG-Ctrl	39.329805996472665	Emx-DG
JJ387	cb1r-vgat	sr	Emx-DG-Ctrl	46.28490298154283	Emx-DG
JJ388	cb1r-vgat	all	Emx-DG-Ctrl	50.811084825954715	Emx-DG
JJ388	cb1r-vgat	sp	Emx-DG-Ctrl	59.14156004952538	Emx-DG
JJ388	cb1r-vgat	so	Emx-DG-Ctrl	41.65302782324059	Emx-DG
JJ388	cb1r-vgat	sr	Emx-DG-Ctrl	46.23513870541612	Emx-DG
JJ025	cb1r-vgat	all	Emx-POMT2-cKO	57.53572975313989	Emx-POMT2
JJ025	cb1r-vgat	sp	Emx-POMT2-cKO	71.06357694592988	Emx-POMT2
JJ025	cb1r-vgat	so	Emx-POMT2-cKO	48.44756883421207	Emx-POMT2
JJ025	cb1r-vgat	sr	Emx-POMT2-cKO	49.707602339181285	Emx-POMT2
JJ026	cb1r-vgat	all	Emx-POMT2-cKO	58.85698038100654	Emx-POMT2
JJ026	cb1r-vgat	sp	Emx-POMT2-cKO	71.2430426716141	Emx-POMT2
JJ026	cb1r-vgat	so	Emx-POMT2-cKO	53.23460639127046	Emx-POMT2
JJ026	cb1r-vgat	sr	Emx-POMT2-cKO	52.414398595259	Emx-POMT2
JJ027	cb1r-vgat	all	Emx-POMT2-cKO	54.523996852871754	Emx-POMT2
JJ027	cb1r-vgat	sp	Emx-POMT2-cKO	62.5	Emx-POMT2
JJ027	cb1r-vgat	so	Emx-POMT2-cKO	51.03211009174312	Emx-POMT2
JJ027	cb1r-vgat	sr	Emx-POMT2-cKO	47.35413839891452	Emx-POMT2
JJ028	cb1r-vgat	all	Emx-POMT2-cKO	53.82381413359148	Emx-POMT2
JJ028	cb1r-vgat	sp	Emx-POMT2-cKO	63.56209150326797	Emx-POMT2
JJ028	cb1r-vgat	so	Emx-POMT2-cKO	51.48632580261593	Emx-POMT2
JJ028	cb1r-vgat	sr	Emx-POMT2-cKO	44.19795221843003	Emx-POMT2
JJ029	cb1r-vgat	all	Emx-POMT2-Ctrl	83.06428773718493	Emx-POMT2
JJ029	cb1r-vgat	sp	Emx-POMT2-Ctrl	88.07870370370371	Emx-POMT2
JJ029	cb1r-vgat	so	Emx-POMT2-Ctrl	80.76923076923077	Emx-POMT2
JJ029	cb1r-vgat	sr	Emx-POMT2-Ctrl	74.77567298105683	Emx-POMT2
JJ030	cb1r-vgat	all	Emx-POMT2-Ctrl	73.38437288898896	Emx-POMT2
JJ030	cb1r-vgat	sp	Emx-POMT2-Ctrl	82.81584582441114	Emx-POMT2
JJ030	cb1r-vgat	so	Emx-POMT2-Ctrl	70.30651340996168	Emx-POMT2
JJ030	cb1r-vgat	sr	Emx-POMT2-Ctrl	62.62359920896506	Emx-POMT2
JJ031	cb1r-vgat	all	Emx-POMT2-Ctrl	73.88734353268428	Emx-POMT2
JJ031	cb1r-vgat	sp	Emx-POMT2-Ctrl	80.80736543909349	Emx-POMT2
JJ031	cb1r-vgat	so	Emx-POMT2-Ctrl	67.0364500792393	Emx-POMT2
JJ031	cb1r-vgat	sr	Emx-POMT2-Ctrl	65.53459119496856	Emx-POMT2
JJ032	cb1r-vgat	all	Emx-POMT2-Ctrl	65.88111150193457	Emx-POMT2
JJ032	cb1r-vgat	sp	Emx-POMT2-Ctrl	75.01725327812284	Emx-POMT2
JJ032	cb1r-vgat	so	Emx-POMT2-Ctrl	58.01253357206804	Emx-POMT2
JJ032	cb1r-vgat	sr	Emx-POMT2-Ctrl	54.398563734290846	Emx-POMT2
JJ129	cb1r-vgat	all	Emx-POMT2-cKO	49.28587123709075	Emx-POMT2
JJ129	cb1r-vgat	sp	Emx-POMT2-cKO	61.6260162601626	Emx-POMT2
JJ129	cb1r-vgat	so	Emx-POMT2-cKO	41.48191365227538	Emx-POMT2
JJ129	cb1r-vgat	sr	Emx-POMT2-cKO	47.60423148724331	Emx-POMT2
JJ130	cb1r-vgat	all	Emx-POMT2-cKO	56.71052631578947	Emx-POMT2
JJ130	cb1r-vgat	sp	Emx-POMT2-cKO	68.19973718791064	Emx-POMT2
JJ130	cb1r-vgat	so	Emx-POMT2-cKO	50.83762886597938	Emx-POMT2
JJ130	cb1r-vgat	sr	Emx-POMT2-cKO	50.33647375504711	Emx-POMT2
JJ131	cb1r-vgat	all	Emx-POMT2-cKO	55.66153846153846	Emx-POMT2
JJ131	cb1r-vgat	sp	Emx-POMT2-cKO	64.75814412635735	Emx-POMT2
JJ131	cb1r-vgat	so	Emx-POMT2-cKO	50.151362260343085	Emx-POMT2
JJ131	cb1r-vgat	sr	Emx-POMT2-cKO	52.00642054574639	Emx-POMT2
JJ132	cb1r-vgat	all	Emx-POMT2-cKO	58.39116719242902	Emx-POMT2
JJ132	cb1r-vgat	sp	Emx-POMT2-cKO	66.91489361702128	Emx-POMT2
JJ132	cb1r-vgat	so	Emx-POMT2-cKO	51.74363807728558	Emx-POMT2
JJ132	cb1r-vgat	sr	Emx-POMT2-cKO	56.800684345594526	Emx-POMT2
JJ133	cb1r-vgat	all	Emx-POMT2-Ctrl	65.96752368064952	Emx-POMT2
JJ133	cb1r-vgat	sp	Emx-POMT2-Ctrl	74.85265225933202	Emx-POMT2
JJ133	cb1r-vgat	so	Emx-POMT2-Ctrl	59.201141226818834	Emx-POMT2
JJ133	cb1r-vgat	sr	Emx-POMT2-Ctrl	58.88040712468193	Emx-POMT2
JJ134	cb1r-vgat	all	Emx-POMT2-Ctrl	64.2483056069008	Emx-POMT2
JJ134	cb1r-vgat	sp	Emx-POMT2-Ctrl	73.38389310220296	Emx-POMT2
JJ134	cb1r-vgat	so	Emx-POMT2-Ctrl	58.56545961002786	Emx-POMT2
JJ134	cb1r-vgat	sr	Emx-POMT2-Ctrl	55.92479230432882	Emx-POMT2
JJ135	cb1r-vgat	all	Emx-POMT2-Ctrl	70.15798712697485	Emx-POMT2
JJ135	cb1r-vgat	sp	Emx-POMT2-Ctrl	78.4	Emx-POMT2
JJ135	cb1r-vgat	so	Emx-POMT2-Ctrl	64.45993031358886	Emx-POMT2
JJ135	cb1r-vgat	sr	Emx-POMT2-Ctrl	63.538295577130526	Emx-POMT2
JJ136	cb1r-vgat	all	Emx-POMT2-Ctrl	65.67947516401125	Emx-POMT2
JJ136	cb1r-vgat	sp	Emx-POMT2-Ctrl	74.34647762516614	Emx-POMT2
JJ136	cb1r-vgat	so	Emx-POMT2-Ctrl	60.06600660066007	Emx-POMT2
JJ136	cb1r-vgat	sr	Emx-POMT2-Ctrl	58.038585209003216	Emx-POMT2
JJ187	cb1r-vgat	all	Emx-POMT2-cKO	52.923832923832926	Emx-POMT2
JJ187	cb1r-vgat	sp	Emx-POMT2-cKO	63.05263157894737	Emx-POMT2
JJ187	cb1r-vgat	so	Emx-POMT2-cKO	48.82924043403769	Emx-POMT2
JJ187	cb1r-vgat	sr	Emx-POMT2-cKO	50.51169590643275	Emx-POMT2
JJ188	cb1r-vgat	all	Emx-POMT2-cKO	60.18168054504164	Emx-POMT2
JJ188	cb1r-vgat	sp	Emx-POMT2-cKO	68.63780359028512	Emx-POMT2
JJ188	cb1r-vgat	so	Emx-POMT2-cKO	54.667519181585675	Emx-POMT2
JJ188	cb1r-vgat	sr	Emx-POMT2-cKO	60.12396694214876	Emx-POMT2
JJ189	cb1r-vgat	all	Emx-POMT2-cKO	60.45068582625735	Emx-POMT2
JJ189	cb1r-vgat	sp	Emx-POMT2-cKO	64.6964856230032	Emx-POMT2
JJ189	cb1r-vgat	so	Emx-POMT2-cKO	56.20121422376409	Emx-POMT2
JJ189	cb1r-vgat	sr	Emx-POMT2-cKO	61.886204208885424	Emx-POMT2
JJ190	cb1r-vgat	all	Emx-POMT2-cKO	56.30228667038483	Emx-POMT2
JJ190	cb1r-vgat	sp	Emx-POMT2-cKO	62.96758104738154	Emx-POMT2
JJ190	cb1r-vgat	so	Emx-POMT2-cKO	53.55348169418521	Emx-POMT2
JJ190	cb1r-vgat	sr	Emx-POMT2-cKO	54.85262401150251	Emx-POMT2
JJ195	cb1r-vgat	all	Emx-POMT2-Ctrl	66.61916072842439	Emx-POMT2
JJ195	cb1r-vgat	sp	Emx-POMT2-Ctrl	74.93413624388408	Emx-POMT2
JJ195	cb1r-vgat	so	Emx-POMT2-Ctrl	59.35280189423836	Emx-POMT2
JJ195	cb1r-vgat	sr	Emx-POMT2-Ctrl	60.76214405360134	Emx-POMT2
JJ196	cb1r-vgat	all	Emx-POMT2-Ctrl	72.3125	Emx-POMT2
JJ196	cb1r-vgat	sp	Emx-POMT2-Ctrl	78.42778793418647	Emx-POMT2
JJ196	cb1r-vgat	so	Emx-POMT2-Ctrl	68.1159420289855	Emx-POMT2
JJ196	cb1r-vgat	sr	Emx-POMT2-Ctrl	66.69418076764342	Emx-POMT2
JJ197	cb1r-vgat	all	Emx-POMT2-Ctrl	67.92696719987075	Emx-POMT2
JJ197	cb1r-vgat	sp	Emx-POMT2-Ctrl	75.41322314049587	Emx-POMT2
JJ197	cb1r-vgat	so	Emx-POMT2-Ctrl	67.26006191950465	Emx-POMT2
JJ197	cb1r-vgat	sr	Emx-POMT2-Ctrl	60.20283975659229	Emx-POMT2
JJ198	cb1r-vgat	all	Emx-POMT2-Ctrl	69.3751075916681	Emx-POMT2
JJ198	cb1r-vgat	sp	Emx-POMT2-Ctrl	76.00172339508832	Emx-POMT2
JJ198	cb1r-vgat	so	Emx-POMT2-Ctrl	65.31492666091458	Emx-POMT2
JJ198	cb1r-vgat	sr	Emx-POMT2-Ctrl	64.06182911120652	Emx-POMT2
JJ203	cb1r-vgat	all	Emx-POMT2-Ctrl	62.903451166689955	Emx-POMT2
JJ203	cb1r-vgat	sp	Emx-POMT2-Ctrl	70.35250463821892	Emx-POMT2
JJ203	cb1r-vgat	so	Emx-POMT2-Ctrl	59.27995034140285	Emx-POMT2
JJ203	cb1r-vgat	sr	Emx-POMT2-Ctrl	57.523675903191865	Emx-POMT2
JJ204	cb1r-vgat	all	Emx-POMT2-Ctrl	71.62754303599374	Emx-POMT2
JJ204	cb1r-vgat	sp	Emx-POMT2-Ctrl	77.43950039032006	Emx-POMT2
JJ204	cb1r-vgat	so	Emx-POMT2-Ctrl	67.59927797833934	Emx-POMT2
JJ204	cb1r-vgat	sr	Emx-POMT2-Ctrl	67.25598526703499	Emx-POMT2
JJ205	cb1r-vgat	all	Emx-POMT2-Ctrl	60.157410157410155	Emx-POMT2
JJ205	cb1r-vgat	sp	Emx-POMT2-Ctrl	68.12406576980568	Emx-POMT2
JJ205	cb1r-vgat	so	Emx-POMT2-Ctrl	57.53217259651779	Emx-POMT2
JJ205	cb1r-vgat	sr	Emx-POMT2-Ctrl	53.10672514619883	Emx-POMT2
JJ206	cb1r-vgat	all	Emx-POMT2-Ctrl	62.719298245614034	Emx-POMT2
JJ206	cb1r-vgat	sp	Emx-POMT2-Ctrl	69.63915387805889	Emx-POMT2
JJ206	cb1r-vgat	so	Emx-POMT2-Ctrl	54.69924812030075	Emx-POMT2
JJ206	cb1r-vgat	sr	Emx-POMT2-Ctrl	58.20224719101124	Emx-POMT2
JJ053	cb1r-vgat	all	B4GAT1-Mutant	62.57245809180636	B4GAT1
JJ053	cb1r-vgat	sp	B4GAT1-Mutant	72.26127709431752	B4GAT1
JJ053	cb1r-vgat	so	B4GAT1-Mutant	50.27442371020856	B4GAT1
JJ053	cb1r-vgat	sr	B4GAT1-Mutant	51.14355231143552	B4GAT1
JJ054	cb1r-vgat	all	B4GAT1-Mutant	68.21458507963118	B4GAT1
JJ054	cb1r-vgat	sp	B4GAT1-Mutant	77.10635359116021	B4GAT1
JJ054	cb1r-vgat	so	B4GAT1-Mutant	59.41794664510913	B4GAT1
JJ054	cb1r-vgat	sr	B4GAT1-Mutant	59.19037199124727	B4GAT1
JJ055	cb1r-vgat	all	B4GAT1-Mutant	51.65268870251603	B4GAT1
JJ055	cb1r-vgat	sp	B4GAT1-Mutant	61.681837884698744	B4GAT1
JJ055	cb1r-vgat	so	B4GAT1-Mutant	29.336188436830835	B4GAT1
JJ055	cb1r-vgat	sr	B4GAT1-Mutant	41.484375	B4GAT1
JJ056	cb1r-vgat	all	B4GAT1-Mutant	48.36509056692543	B4GAT1
JJ056	cb1r-vgat	sp	B4GAT1-Mutant	60.044642857142854	B4GAT1
JJ056	cb1r-vgat	so	B4GAT1-Mutant	34.119496855345915	B4GAT1
JJ056	cb1r-vgat	sr	B4GAT1-Mutant	41.40022050716648	B4GAT1
JJ057	cb1r-vgat	all	B4GAT1-Ctrl	62.22318090307736	B4GAT1
JJ057	cb1r-vgat	sp	B4GAT1-Ctrl	74.8451053283767	B4GAT1
JJ057	cb1r-vgat	so	B4GAT1-Ctrl	50.28328611898017	B4GAT1
JJ057	cb1r-vgat	sr	B4GAT1-Ctrl	51.149674620390456	B4GAT1
JJ058	cb1r-vgat	all	B4GAT1-Ctrl	62.749883774988376	B4GAT1
JJ058	cb1r-vgat	sp	B4GAT1-Ctrl	75.3323108384458	B4GAT1
JJ058	cb1r-vgat	so	B4GAT1-Ctrl	52.00525969756739	B4GAT1
JJ058	cb1r-vgat	sr	B4GAT1-Ctrl	52.12866603595081	B4GAT1
JJ059	cb1r-vgat	all	B4GAT1-Ctrl	65.93268323372129	B4GAT1
JJ059	cb1r-vgat	sp	B4GAT1-Ctrl	77.87928221859707	B4GAT1
JJ059	cb1r-vgat	so	B4GAT1-Ctrl	53.207869974337044	B4GAT1
JJ059	cb1r-vgat	sr	B4GAT1-Ctrl	55.131826741996235	B4GAT1
JJ060	cb1r-vgat	all	B4GAT1-Ctrl	57.609964966913196	B4GAT1
JJ060	cb1r-vgat	sp	B4GAT1-Ctrl	70.43330501274427	B4GAT1
JJ060	cb1r-vgat	so	B4GAT1-Ctrl	45.94017094017094	B4GAT1
JJ060	cb1r-vgat	sr	B4GAT1-Ctrl	46.53679653679654	B4GAT1
JJ077	cb1r-vgat	all	B4GAT1-Mutant	57.40994072047424	B4GAT1
JJ077	cb1r-vgat	sp	B4GAT1-Mutant	67.6470588235294	B4GAT1
JJ077	cb1r-vgat	so	B4GAT1-Mutant	46.846846846846844	B4GAT1
JJ077	cb1r-vgat	sr	B4GAT1-Mutant	47.89762340036563	B4GAT1
JJ078	cb1r-vgat	all	B4GAT1-Mutant	53.26261008807046	B4GAT1
JJ078	cb1r-vgat	sp	B4GAT1-Mutant	64.27034007748601	B4GAT1
JJ078	cb1r-vgat	so	B4GAT1-Mutant	40.171990171990174	B4GAT1
JJ078	cb1r-vgat	sr	B4GAT1-Mutant	44.48628294782141	B4GAT1
JJ079	cb1r-vgat	all	B4GAT1-Mutant	52.01430274135876	B4GAT1
JJ079	cb1r-vgat	sp	B4GAT1-Mutant	63.488016318205	B4GAT1
JJ079	cb1r-vgat	so	B4GAT1-Mutant	40.69444444444444	B4GAT1
JJ079	cb1r-vgat	sr	B4GAT1-Mutant	42.003981420039814	B4GAT1
JJ080	cb1r-vgat	all	B4GAT1-Mutant	56.95544554455446	B4GAT1
JJ080	cb1r-vgat	sp	B4GAT1-Mutant	63.758389261744966	B4GAT1
JJ080	cb1r-vgat	so	B4GAT1-Mutant	46.263345195729535	B4GAT1
JJ080	cb1r-vgat	sr	B4GAT1-Mutant	51.497395833333336	B4GAT1
JJ085	cb1r-vgat	all	B4GAT1-Mutant	63.756960366852276	B4GAT1
JJ085	cb1r-vgat	sp	B4GAT1-Mutant	72.91520672740015	B4GAT1
JJ085	cb1r-vgat	so	B4GAT1-Mutant	51.91122071516646	B4GAT1
JJ085	cb1r-vgat	sr	B4GAT1-Mutant	56.41447368421053	B4GAT1
JJ086	cb1r-vgat	all	B4GAT1-Mutant	58.12244897959184	B4GAT1
JJ086	cb1r-vgat	sp	B4GAT1-Mutant	67.95665634674923	B4GAT1
JJ086	cb1r-vgat	so	B4GAT1-Mutant	49.63325183374083	B4GAT1
JJ086	cb1r-vgat	sr	B4GAT1-Mutant	50.95073465859983	B4GAT1
JJ087	cb1r-vgat	all	B4GAT1-Mutant	59.25602514844569	B4GAT1
JJ087	cb1r-vgat	sp	B4GAT1-Mutant	69.70610399397137	B4GAT1
JJ087	cb1r-vgat	so	B4GAT1-Mutant	49.06900328587076	B4GAT1
JJ087	cb1r-vgat	sr	B4GAT1-Mutant	49.65197215777262	B4GAT1
JJ088	cb1r-vgat	all	B4GAT1-Mutant	59.49602570607137	B4GAT1
JJ088	cb1r-vgat	sp	B4GAT1-Mutant	69.31216931216932	B4GAT1
JJ088	cb1r-vgat	so	B4GAT1-Mutant	51.282051282051285	B4GAT1
JJ088	cb1r-vgat	sr	B4GAT1-Mutant	52.36220472440945	B4GAT1
JJ093	cb1r-vgat	all	B4GAT1-Ctrl	60.602636534839924	B4GAT1
JJ093	cb1r-vgat	sp	B4GAT1-Ctrl	70.52173913043478	B4GAT1
JJ093	cb1r-vgat	so	B4GAT1-Ctrl	47.1872931833223	B4GAT1
JJ093	cb1r-vgat	sr	B4GAT1-Ctrl	55.05922165820643	B4GAT1
JJ094	cb1r-vgat	all	B4GAT1-Ctrl	68.34384249131386	B4GAT1
JJ094	cb1r-vgat	sp	B4GAT1-Ctrl	75.04862461794943	B4GAT1
JJ094	cb1r-vgat	so	B4GAT1-Ctrl	57.95454545454545	B4GAT1
JJ094	cb1r-vgat	sr	B4GAT1-Ctrl	64.25470332850941	B4GAT1
JJ095	cb1r-vgat	all	B4GAT1-Ctrl	56.05788934426229	B4GAT1
JJ095	cb1r-vgat	sp	B4GAT1-Ctrl	67.83258594917788	B4GAT1
JJ095	cb1r-vgat	so	B4GAT1-Ctrl	42.5	B4GAT1
JJ095	cb1r-vgat	sr	B4GAT1-Ctrl	49.167516139993204	B4GAT1
JJ096	cb1r-vgat	all	B4GAT1-Ctrl	62.20053238686779	B4GAT1
JJ096	cb1r-vgat	sp	B4GAT1-Ctrl	70.99934683213586	B4GAT1
JJ096	cb1r-vgat	so	B4GAT1-Ctrl	51.14006514657981	B4GAT1
JJ096	cb1r-vgat	sr	B4GAT1-Ctrl	56.1084142394822	B4GAT1
JJ101	cb1r-vgat	all	B4GAT1-Ctrl	68.35131812593907	B4GAT1
JJ101	cb1r-vgat	sp	B4GAT1-Ctrl	77.02567522507502	B4GAT1
JJ101	cb1r-vgat	so	B4GAT1-Ctrl	61.75213675213675	B4GAT1
JJ101	cb1r-vgat	sr	B4GAT1-Ctrl	61.96064894718675	B4GAT1
JJ102	cb1r-vgat	all	B4GAT1-Ctrl	68.26317116208722	B4GAT1
JJ102	cb1r-vgat	sp	B4GAT1-Ctrl	76.91097829506134	B4GAT1
JJ102	cb1r-vgat	so	B4GAT1-Ctrl	62.46987951807229	B4GAT1
JJ102	cb1r-vgat	sr	B4GAT1-Ctrl	62.035541195476576	B4GAT1
JJ103	cb1r-vgat	all	B4GAT1-Ctrl	56.934186771705235	B4GAT1
JJ103	cb1r-vgat	sp	B4GAT1-Ctrl	69.93197278911565	B4GAT1
JJ103	cb1r-vgat	so	B4GAT1-Ctrl	45.657370517928285	B4GAT1
JJ103	cb1r-vgat	sr	B4GAT1-Ctrl	50.475827940616675	B4GAT1
JJ104	cb1r-vgat	all	B4GAT1-Ctrl	62.912400455062574	B4GAT1
JJ104	cb1r-vgat	sp	B4GAT1-Ctrl	72.96969696969697	B4GAT1
JJ104	cb1r-vgat	so	B4GAT1-Ctrl	55.798864557988644	B4GAT1
JJ104	cb1r-vgat	sr	B4GAT1-Ctrl	55.73837926779103	B4GAT1
JJ238	cb1r-vgat	all	FKRP-Mutant	58.83620689655172	FKRP
JJ238	cb1r-vgat	sp	FKRP-Mutant	67.38035264483628	FKRP
JJ238	cb1r-vgat	so	FKRP-Mutant	52.742616033755276	FKRP
JJ238	cb1r-vgat	sr	FKRP-Mutant	51.73389950460014	FKRP
JJ239	cb1r-vgat	all	FKRP-Mutant	57.41839762611276	FKRP
JJ239	cb1r-vgat	sp	FKRP-Mutant	65.18475750577367	FKRP
JJ239	cb1r-vgat	so	FKRP-Mutant	50.62761506276151	FKRP
JJ239	cb1r-vgat	sr	FKRP-Mutant	51.046290424857325	FKRP
JJ240	cb1r-vgat	all	FKRP-Mutant	53.17806889859292	FKRP
JJ240	cb1r-vgat	sp	FKRP-Mutant	61.52974504249292	FKRP
JJ240	cb1r-vgat	so	FKRP-Mutant	43.39622641509434	FKRP
JJ240	cb1r-vgat	sr	FKRP-Mutant	47.88732394366197	FKRP
JJ241	cb1r-vgat	all	FKRP-Mutant	54.59132189707366	FKRP
JJ241	cb1r-vgat	sp	FKRP-Mutant	61.91895113230036	FKRP
JJ241	cb1r-vgat	so	FKRP-Mutant	47.69230769230769	FKRP
JJ241	cb1r-vgat	sr	FKRP-Mutant	48.887343532684284	FKRP
JJ246	cb1r-vgat	all	FKRP-Ctrl	59.194425560842966	FKRP
JJ246	cb1r-vgat	sp	FKRP-Ctrl	66.93989071038251	FKRP
JJ246	cb1r-vgat	so	FKRP-Ctrl	55.24781341107872	FKRP
JJ246	cb1r-vgat	sr	FKRP-Ctrl	53.653264159100736	FKRP
JJ247	cb1r-vgat	all	FKRP-Ctrl	60.2080845983285	FKRP
JJ247	cb1r-vgat	sp	FKRP-Ctrl	68.01363193768258	FKRP
JJ247	cb1r-vgat	so	FKRP-Ctrl	53.98195370733621	FKRP
JJ247	cb1r-vgat	sr	FKRP-Ctrl	58.96825396825397	FKRP
JJ248	cb1r-vgat	all	FKRP-Ctrl	61.82248520710059	FKRP
JJ248	cb1r-vgat	sp	FKRP-Ctrl	70.06760909649662	FKRP
JJ248	cb1r-vgat	so	FKRP-Ctrl	58.80535530381051	FKRP
JJ248	cb1r-vgat	sr	FKRP-Ctrl	54.58461538461538	FKRP
JJ249	cb1r-vgat	all	FKRP-Ctrl	57.316837425091826	FKRP
JJ249	cb1r-vgat	sp	FKRP-Ctrl	65.16352824578792	FKRP
JJ249	cb1r-vgat	so	FKRP-Ctrl	52.87671232876713	FKRP
JJ249	cb1r-vgat	sr	FKRP-Ctrl	51.095957135898686	FKRP
JJ254	cb1r-vgat	all	FKRP-Mutant	60.51222351571595	FKRP
JJ254	cb1r-vgat	sp	FKRP-Mutant	64.20664206642067	FKRP
JJ254	cb1r-vgat	so	FKRP-Mutant	53.58090185676392	FKRP
JJ254	cb1r-vgat	sr	FKRP-Mutant	59.32114882506527	FKRP
JJ255	cb1r-vgat	all	FKRP-Mutant	53.446771378708554	FKRP
JJ255	cb1r-vgat	sp	FKRP-Mutant	59.591617409994626	FKRP
JJ255	cb1r-vgat	so	FKRP-Mutant	45.357142857142854	FKRP
JJ255	cb1r-vgat	sr	FKRP-Mutant	50.63761955366631	FKRP
JJ256	cb1r-vgat	all	FKRP-Mutant	60.763723150358	FKRP
JJ256	cb1r-vgat	sp	FKRP-Mutant	63.40425531914894	FKRP
JJ256	cb1r-vgat	so	FKRP-Mutant	55.104551045510455	FKRP
JJ256	cb1r-vgat	sr	FKRP-Mutant	59.84979780473714	FKRP
JJ257	cb1r-vgat	all	FKRP-Mutant	60.2543720190779	FKRP
JJ257	cb1r-vgat	sp	FKRP-Mutant	65.29987760097919	FKRP
JJ257	cb1r-vgat	so	FKRP-Mutant	51.7557251908397	FKRP
JJ257	cb1r-vgat	sr	FKRP-Mutant	57.58597437626433	FKRP
JJ262	cb1r-vgat	all	FKRP-Ctrl	65.0408083948698	FKRP
JJ262	cb1r-vgat	sp	FKRP-Ctrl	68.73461349089119	FKRP
JJ262	cb1r-vgat	so	FKRP-Ctrl	60.60606060606061	FKRP
JJ262	cb1r-vgat	sr	FKRP-Ctrl	62.75767292716445	FKRP
JJ263	cb1r-vgat	all	FKRP-Ctrl	62.29806138933764	FKRP
JJ263	cb1r-vgat	sp	FKRP-Ctrl	66.46706586826348	FKRP
JJ263	cb1r-vgat	so	FKRP-Ctrl	56.84430512016719	FKRP
JJ263	cb1r-vgat	sr	FKRP-Ctrl	60.02009040683074	FKRP
JJ264	cb1r-vgat	all	FKRP-Ctrl	66.3278833406982	FKRP
JJ264	cb1r-vgat	sp	FKRP-Ctrl	69.06758756783424	FKRP
JJ264	cb1r-vgat	so	FKRP-Ctrl	60.946745562130175	FKRP
JJ264	cb1r-vgat	sr	FKRP-Ctrl	64.68806783767414	FKRP
JJ265	cb1r-vgat	all	FKRP-Ctrl	60.57007125890736	FKRP
JJ265	cb1r-vgat	sp	FKRP-Ctrl	65.67230632235085	FKRP
JJ265	cb1r-vgat	so	FKRP-Ctrl	59.31232091690544	FKRP
JJ265	cb1r-vgat	sr	FKRP-Ctrl	55.41284403669725	FKRP
JJ326	cb1r-vgat	all	FKRP-Mutant	60.27452025586354	FKRP
JJ326	cb1r-vgat	sp	FKRP-Mutant	66.30083925112976	FKRP
JJ326	cb1r-vgat	so	FKRP-Mutant	52.13204951856947	FKRP
JJ326	cb1r-vgat	sr	FKRP-Mutant	57.486449864498645	FKRP
JJ327	cb1r-vgat	all	FKRP-Mutant	59.990937924784774	FKRP
JJ327	cb1r-vgat	sp	FKRP-Mutant	65.35310183378853	FKRP
JJ327	cb1r-vgat	so	FKRP-Mutant	51.64930555555556	FKRP
JJ327	cb1r-vgat	sr	FKRP-Mutant	57.845836200963525	FKRP
JJ328	cb1r-vgat	all	FKRP-Mutant	62.20710506424792	FKRP
JJ328	cb1r-vgat	sp	FKRP-Mutant	65.45454545454545	FKRP
JJ328	cb1r-vgat	so	FKRP-Mutant	59.06696764484575	FKRP
JJ328	cb1r-vgat	sr	FKRP-Mutant	60.450268817204304	FKRP
JJ329	cb1r-vgat	all	FKRP-Mutant	58.041042060835395	FKRP
JJ329	cb1r-vgat	sp	FKRP-Mutant	62.972869698127624	FKRP
JJ329	cb1r-vgat	so	FKRP-Mutant	51.52766308835673	FKRP
JJ329	cb1r-vgat	sr	FKRP-Mutant	55.66874794610582	FKRP
JJ330	cb1r-vgat	all	FKRP-Ctrl	65.50269510194516	FKRP
JJ330	cb1r-vgat	sp	FKRP-Ctrl	68.5241472475515	FKRP
JJ330	cb1r-vgat	so	FKRP-Ctrl	61.748900830483635	FKRP
JJ330	cb1r-vgat	sr	FKRP-Ctrl	64.18037436188315	FKRP
JJ331	cb1r-vgat	all	FKRP-Ctrl	62.889966273187184	FKRP
JJ331	cb1r-vgat	sp	FKRP-Ctrl	67.32329084588645	FKRP
JJ331	cb1r-vgat	so	FKRP-Ctrl	58.097165991902834	FKRP
JJ331	cb1r-vgat	sr	FKRP-Ctrl	60.8128078817734	FKRP
JJ332	cb1r-vgat	all	FKRP-Ctrl	64.4749876176325	FKRP
JJ332	cb1r-vgat	sp	FKRP-Ctrl	67.64995083579154	FKRP
JJ332	cb1r-vgat	so	FKRP-Ctrl	59.3520782396088	FKRP
JJ332	cb1r-vgat	sr	FKRP-Ctrl	63.29300678666273	FKRP
JJ333	cb1r-vgat	all	FKRP-Ctrl	68.59813084112149	FKRP
JJ333	cb1r-vgat	sp	FKRP-Ctrl	70.54639508567733	FKRP
JJ333	cb1r-vgat	so	FKRP-Ctrl	61.833019460138104	FKRP
JJ333	cb1r-vgat	sr	FKRP-Ctrl	69.36208445642409	FKRP
JJ266	cb1r-vgat	all	ICD-Mutant	55.71348940914158	ICD
JJ266	cb1r-vgat	sp	ICD-Mutant	60.49586776859504	ICD
JJ266	cb1r-vgat	so	ICD-Mutant	56.76969960818459	ICD
JJ266	cb1r-vgat	sr	ICD-Mutant	49.28832858885726	ICD
JJ267	cb1r-vgat	all	ICD-Mutant	60.98761511590981	ICD
JJ267	cb1r-vgat	sp	ICD-Mutant	63.269424823410695	ICD
JJ267	cb1r-vgat	so	ICD-Mutant	55.523917995444194	ICD
JJ267	cb1r-vgat	sr	ICD-Mutant	62.3828125	ICD
JJ268	cb1r-vgat	all	ICD-Mutant	65.02775574940523	ICD
JJ268	cb1r-vgat	sp	ICD-Mutant	64.71910112359551	ICD
JJ268	cb1r-vgat	so	ICD-Mutant	63.75087473757873	ICD
JJ268	cb1r-vgat	sr	ICD-Mutant	65.99455040871935	ICD
JJ269	cb1r-vgat	all	ICD-Mutant	58.983361318882615	ICD
JJ269	cb1r-vgat	sp	ICD-Mutant	60.72576940744143	ICD
JJ269	cb1r-vgat	so	ICD-Mutant	57.395833333333336	ICD
JJ269	cb1r-vgat	sr	ICD-Mutant	58.10920945395273	ICD
JJ274	cb1r-vgat	all	ICD-Ctrl	61.497230659281755	ICD
JJ274	cb1r-vgat	sp	ICD-Ctrl	65.60374149659864	ICD
JJ274	cb1r-vgat	so	ICD-Ctrl	58.419567262464724	ICD
JJ274	cb1r-vgat	sr	ICD-Ctrl	57.90921595598349	ICD
JJ275	cb1r-vgat	all	ICD-Ctrl	59.651578783636644	ICD
JJ275	cb1r-vgat	sp	ICD-Ctrl	64.64688675302968	ICD
JJ275	cb1r-vgat	so	ICD-Ctrl	55.0303848750844	ICD
JJ275	cb1r-vgat	sr	ICD-Ctrl	56.71232876712329	ICD
JJ276	cb1r-vgat	all	ICD-Ctrl	55.30377668308703	ICD
JJ276	cb1r-vgat	sp	ICD-Ctrl	63.34453154162001	ICD
JJ276	cb1r-vgat	so	ICD-Ctrl	46.03448275862069	ICD
JJ276	cb1r-vgat	sr	ICD-Ctrl	50.06663705019991	ICD
JJ277	cb1r-vgat	all	ICD-Ctrl	57.49510124101894	ICD
JJ277	cb1r-vgat	sp	ICD-Ctrl	63.22020520915549	ICD
JJ277	cb1r-vgat	so	ICD-Ctrl	49.66044142614601	ICD
JJ277	cb1r-vgat	sr	ICD-Ctrl	54.58316051430941	ICD
JJ298	cb1r-vgat	all	ICD-Mutant	69.02855777273271	ICD
JJ298	cb1r-vgat	sp	ICD-Mutant	68.57731958762886	ICD
JJ298	cb1r-vgat	so	ICD-Mutant	65.5312847093669	ICD
JJ298	cb1r-vgat	sr	ICD-Mutant	71.79012345679013	ICD
JJ299	cb1r-vgat	all	ICD-Mutant	63.17685705202925	ICD
JJ299	cb1r-vgat	sp	ICD-Mutant	66.22271550129486	ICD
JJ299	cb1r-vgat	so	ICD-Mutant	60.42540443379269	ICD
JJ299	cb1r-vgat	sr	ICD-Mutant	62.926972909305064	ICD
JJ300	cb1r-vgat	all	ICD-Mutant	62.81320024444897	ICD
JJ300	cb1r-vgat	sp	ICD-Mutant	64.41048034934498	ICD
JJ300	cb1r-vgat	so	ICD-Mutant	59.6875	ICD
JJ300	cb1r-vgat	sr	ICD-Mutant	63.48837209302326	ICD
JJ301	cb1r-vgat	all	ICD-Mutant	59.878116343490305	ICD
JJ301	cb1r-vgat	sp	ICD-Mutant	63.09347181008902	ICD
JJ301	cb1r-vgat	so	ICD-Mutant	54.716981132075475	ICD
JJ301	cb1r-vgat	sr	ICD-Mutant	61.07954545454545	ICD
JJ306	cb1r-vgat	all	ICD-Mutant	69.70284807336213	ICD
JJ306	cb1r-vgat	sp	ICD-Mutant	70.59994313335228	ICD
JJ306	cb1r-vgat	so	ICD-Mutant	66.41630901287553	ICD
JJ306	cb1r-vgat	sr	ICD-Mutant	71.3623046875	ICD
JJ307	cb1r-vgat	all	ICD-Mutant	68.3841872961044	ICD
JJ307	cb1r-vgat	sp	ICD-Mutant	68.74613959234095	ICD
JJ307	cb1r-vgat	so	ICD-Mutant	63.66723259762309	ICD
JJ307	cb1r-vgat	sr	ICD-Mutant	71.86301369863014	ICD
JJ308	cb1r-vgat	all	ICD-Mutant	63.278096452092626	ICD
JJ308	cb1r-vgat	sp	ICD-Mutant	65.6406825025092	ICD
JJ308	cb1r-vgat	so	ICD-Mutant	59.193548387096776	ICD
JJ308	cb1r-vgat	sr	ICD-Mutant	64.2406015037594	ICD
JJ309	cb1r-vgat	all	ICD-Mutant	68.31443355719476	ICD
JJ309	cb1r-vgat	sp	ICD-Mutant	67.77932313398239	ICD
JJ309	cb1r-vgat	so	ICD-Mutant	64.48405896468975	ICD
JJ309	cb1r-vgat	sr	ICD-Mutant	70.86555250685957	ICD
JJ314	cb1r-vgat	all	ICD-Ctrl	59.008716014049696	ICD
JJ314	cb1r-vgat	sp	ICD-Ctrl	65.77361018084393	ICD
JJ314	cb1r-vgat	so	ICD-Ctrl	51.81315304240934	ICD
JJ314	cb1r-vgat	sr	ICD-Ctrl	55.660377358490564	ICD
JJ315	cb1r-vgat	all	ICD-Ctrl	67.65422598435296	ICD
JJ315	cb1r-vgat	sp	ICD-Ctrl	71.12720403022671	ICD
JJ315	cb1r-vgat	so	ICD-Ctrl	65.27397260273973	ICD
JJ315	cb1r-vgat	sr	ICD-Ctrl	64.53653906991458	ICD
JJ316	cb1r-vgat	all	ICD-Ctrl	60.01446131597975	ICD
JJ316	cb1r-vgat	sp	ICD-Ctrl	64.43812233285918	ICD
JJ316	cb1r-vgat	so	ICD-Ctrl	54.35356200527705	ICD
JJ316	cb1r-vgat	sr	ICD-Ctrl	57.75028991109393	ICD
JJ317	cb1r-vgat	all	ICD-Ctrl	60.710128055878926	ICD
JJ317	cb1r-vgat	sp	ICD-Ctrl	65.45768566493955	ICD
JJ317	cb1r-vgat	so	ICD-Ctrl	55.34779356768885	ICD
JJ317	cb1r-vgat	sr	ICD-Ctrl	57.77693474962064	ICD
JJ322	cb1r-vgat	all	ICD-Ctrl	60.2735781137509	ICD
JJ322	cb1r-vgat	sp	ICD-Ctrl	65.22585669781931	ICD
JJ322	cb1r-vgat	so	ICD-Ctrl	55.60117302052786	ICD
JJ322	cb1r-vgat	sr	ICD-Ctrl	57.999250655676285	ICD
JJ323	cb1r-vgat	all	ICD-Ctrl	64.71620097732114	ICD
JJ323	cb1r-vgat	sp	ICD-Ctrl	67.66602192134107	ICD
JJ323	cb1r-vgat	so	ICD-Ctrl	60.18518518518518	ICD
JJ323	cb1r-vgat	sr	ICD-Ctrl	63.69406537607109	ICD
JJ324	cb1r-vgat	all	ICD-Ctrl	61.982472045935324	ICD
JJ324	cb1r-vgat	sp	ICD-Ctrl	65.23639253079062	ICD
JJ324	cb1r-vgat	so	ICD-Ctrl	58.79428216283406	ICD
JJ324	cb1r-vgat	sr	ICD-Ctrl	60.02410606669345	ICD
JJ325	cb1r-vgat	all	ICD-Ctrl	62.91788630411339	ICD
JJ325	cb1r-vgat	sp	ICD-Ctrl	65.96654998055232	ICD
JJ325	cb1r-vgat	so	ICD-Ctrl	61.53846153846154	ICD
JJ325	cb1r-vgat	sr	ICD-Ctrl	60.11173184357542	ICD
