# Supplementary material for: Inhibitory CCK+ basket synapse defects in mouse models of dystroglycanopathy
Source: eLife. 2024 Jan 5;12:RP87965. doi: 10.7554/eLife.87965 (PMC10942650; doi:10.7554/eLife.87965)
Supplement: Figure 6—source data 1. [file elife-87965-fig6-data1.csv]

Cell	Condition	Experiment	Freq_baseline	Freq_CCh	Freq_PctChange	Amp_baseline	Amp_CCh	Responder
2019-10-09 c2	Emx-DG-Ctrl	Emx-DG	8.8561525	18.51993	109.11936645174073	-65.06179	-75.087242	Yes
2019-10-09 c3	Emx-DG-Ctrl	Emx-DG	6.2853842	13.453495	114.0441152348332	-60.465378	-73.792664	Yes
2019-11-05 c1	Emx-DG-Ctrl	Emx-DG	0.82047915	2.6714802	225.6000106766881	-49.051208	-51.569515	Yes
2019-11-05 c2	Emx-DG-Ctrl	Emx-DG	2.2093863	5.6377859	155.17429432779593	-100.97736	-68.754913	Yes
2019-11-05 c3	Emx-DG-Ctrl	Emx-DG	1.2319494	5.4632974	343.46767813678065	-53.327393	-103.08028	Yes
2019-11-06 c4	Emx-DG-cKO	Emx-DG	3.2779784	3.5282791	7.635825178103674	-68.928757	-62.351585	No
2019-11-07 c1	Emx-DG-cKO	Emx-DG	4.638989	3.8312273	-17.41245129057214	-47.665501	-69.338814	No
2019-11-08 c1	Emx-DG-cKO	Emx-DG	7.9989686	8.1310749	1.6515416750104424	-66.863411	-64.470535	No
2019-12-05 c1	Emx-DG-Ctrl	Emx-DG	7.1447139	11.69844	63.73559758634981	-57.854095	-58.074173	Yes
2019-12-10 c1	Emx-DG-Ctrl	Emx-DG	4.8796458	4.7217407	-3.235995120793395	-57.782749	-46.124306	No
2019-12-12 c1	Emx-DG-Ctrl	Emx-DG	7.4419413	15.487001	108.1043154694058	-71.930298	-88.851494	Yes
2019-12-17 c1	Emx-DG-cKO	Emx-DG	9.139226	5.499711	-39.82301127031984	-65.580109	-80.349457	No
2021-07-06 c1	Emx-DG-cKO	Emx-DG	4.2807627	5.1195841	19.595138969043987	-59.281174	-42.50983	No
2021-07-06 c2	Emx-DG-cKO	Emx-DG	0.68977469	2.6135182	278.894476397793	-82.776245	-55.292515	Yes
2021-07-07 c1	Emx-DG-cKO	Emx-DG	1.577123	2.0727901	31.42856327629488	-85.275299	-55.375053	No
2021-07-07 c2	Emx-DG-cKO	Emx-DG	5.681109	6.6551127	17.1446050410228	-53.626373	-47.107635	No
2021-07-07 c4	Emx-DG-cKO	Emx-DG	5.4870019	11.254766	105.1168599012149	-79.618683	-58.589596	Yes
2021-07-08 c2	Emx-DG-cKO	Emx-DG	3.2443674	4.3015599	32.5854741358824	-87.153633	-61.661644	Yes
2021-07-08 c3	Emx-DG-cKO	Emx-DG	2.592721	13.861352	434.62566932577784	-65.854218	-72.493866	Yes
2021-07-09 c1	Emx-DG-cKO	Emx-DG	10.859619	1.5667244	-85.5729340044066	-88.8992	-85.992104	No
2021-07-09 c2	Emx-DG-cKO	Emx-DG	9.3206244	11.705373	25.585717197229833	-60.421577	-63.456833	Yes
2021-07-09 c3	Emx-DG-cKO	Emx-DG	3.441941	2.662045	-22.658610359677866	-60.01265	-67.087112	No
2021-07-09 c4	Emx-DG-cKO	Emx-DG	5.5285959	10.381283	87.77431354677233	-52.242779	-54.635658	Yes
2021-07-09 c5	Emx-DG-cKO	Emx-DG	11.809359	14.426343	22.160254421937708	-70.596931	-84.538475	Yes
2021-07-09 c6	Emx-DG-cKO	Emx-DG	2.1559792	15.670711	626.8488953882301	-79.127838	-63.528461	Yes
2021-07-09 c7	Emx-DG-cKO	Emx-DG	3.7123051	5.9584055	60.504197243917254	-62.983509	-57.790741	Yes
2021-07-09 c8	Emx-DG-cKO	Emx-DG	1.6013864	7.9410744	395.8874635128661	-53.624939	-55.602077	Yes
2021-07-09 c9	Emx-DG-cKO	Emx-DG	3.8509531	6.2876949	63.27633021549912	-63.788952	-50.089073	Yes
2021-07-09 c10	Emx-DG-cKO	Emx-DG	2.932409	10.783362	267.7304905284359	-72.432152	-66.027992	Yes
2021-07-15 c2	Emx-DG-Ctrl	Emx-DG	8.4991331	13.802426	62.398045042970324	-67.574318	-80.440079	Yes
2021-07-15 c5	Emx-DG-Ctrl	Emx-DG	2.4852686	4.3570189	75.31380310361624	-61.338314	-53.660583	Yes
2021-07-16 c1	Emx-DG-Ctrl	Emx-DG	4.9809361	5.1923742	4.24494704921028	-49.126232	-68.136505	No
2021-08-11 c1	Emx-DG-cKO	Emx-DG	6.1247835	10.77643	75.9479335065476	-64.190445	-53.332951	Yes
2021-08-12 c1	Emx-DG-Ctrl	Emx-DG	3.0155978	14.343154	375.6321947177438	-58.743092	-90.816788	Yes
2021-08-12 c2	Emx-DG-Ctrl	Emx-DG	3.9930677	20.634315	416.7534474809931	-76.713608	-68.678032	Yes
2021-08-12 c3	Emx-DG-Ctrl	Emx-DG	7.7989602	10.013865	28.400001323253314	-54.250172	-81.952339	Yes
2021-08-12 c4	Emx-DG-Ctrl	Emx-DG	5.1334491	18.457539	259.55433940116404	-66.291252	-79.351624	Yes
2021-08-12 c5	Emx-DG-Ctrl	Emx-DG	4.64818	33.476601	620.2087913979235	-59.364971	-76.889336	Yes
2021-08-12 c6	Emx-DG-Ctrl	Emx-DG	1.4142114	7.4280763	425.2451154049529	-50.821102	-62.147739	Yes
2021-08-12 c8	Emx-DG-Ctrl	Emx-DG	3.5285962	12.662045	258.84086141678665	-55.772411	-66.286766	Yes
2021-08-13 c1	Emx-DG-Ctrl	Emx-DG	1.7123051	5.6707106	231.17407639561426	-52.454609	-53.151901	Yes
2021-08-13 c2	Emx-DG-Ctrl	Emx-DG	2.8561525	12.194108	326.94176869057236	-61.657085	-63.893993	Yes
2021-08-13 c3	Emx-DG-Ctrl	Emx-DG	3.5008667	13.79896	294.15839511969995	-58.571243	-79.595703	Yes
2021-09-09 c1	Emx-POMT2-Ctrl	Emx-POMT2	6.6239166	19.171577	189.42962536696186	-93.048721	-107.65364	Yes
2021-09-09 c2	Emx-POMT2-Ctrl	Emx-POMT2	3.4939342	11.566725	231.05159793793484	-55.409958	-53.968864	Yes
2021-09-09 c3	Emx-POMT2-Ctrl	Emx-POMT2	4.9393415	11.237435	127.5087681222284	-65.302444	-79.109985	Yes
2021-09-09 c4	Emx-POMT2-Ctrl	Emx-POMT2	7.490468	23.365685	211.93892023836162	-77.434082	-85.402008	Yes
2021-09-09 c5	Emx-POMT2-Ctrl	Emx-POMT2	7.6741767	15.109185	96.88346503671201	-72.055275	-69.574966	Yes
2021-09-09 c6	Emx-POMT2-Ctrl	Emx-POMT2	3.1750433	17.961872	465.72053678763996	-85.683022	-84.648933	Yes
2021-09-10 c2	Emx-POMT2-cKO	Emx-POMT2	4.3500867	9.0051994	107.01195219856193	-63.588638	-59.907749	Yes
2021-09-10 c3	Emx-POMT2-cKO	Emx-POMT2	7.5875216	8.7798958	15.714936482025971	-59.547138	-54.011093	No
2021-10-26 c2	Emx-POMT2-Ctrl	Emx-POMT2	3.9410746	21.760832	452.15478539787097	-63.86684	-108.71559	Yes
2021-10-26 c3	Emx-POMT2-Ctrl	Emx-POMT2	1.6776429	7.5632582	350.8264661090867	-51.413811	-99.718987	Yes
2021-10-26 c4	Emx-POMT2-Ctrl	Emx-POMT2	2.3535528	5.2998266	125.18409614604779	-59.239273	-68.324242	Yes
2021-10-27 c1	Emx-POMT2-cKO	Emx-POMT2	7.3968806	5.5216637	-25.351455585209795	-60.211311	-57.280602	No
2021-10-27 c2	Emx-POMT2-cKO	Emx-POMT2	5.6325822	6.5511265	16.307694541945608	-76.429359	-125.39814	No
2021-10-27 c3	Emx-POMT2-cKO	Emx-POMT2	7.9376082	7.3830156	-6.986898143952223	-60.492931	-78.549507	No
2021-10-27 c4	Emx-POMT2-cKO	Emx-POMT2	4.7348351	3.965338	-16.251824693958184	-60.024567	-53.600235	No
2022-02-15 c1	Emx-POMT2-cKO	Emx-POMT2	9.3968801	18.27383	94.46699123041911	-70.888756	-64.906517	Yes
2022-02-15 c2	Emx-POMT2-cKO	Emx-POMT2	1.4870017	2.4922011	67.59907537429177	-51.767487	-49.201103	Yes
2022-02-16 c1	Emx-POMT2-cKO	Emx-POMT2	14.956673	13.240901	-11.471615378634013	-68.316681	-61.502182	No
2022-02-16 c2	Emx-POMT2-cKO	Emx-POMT2	9.0779896	5.4142113	-40.35891713292997	-71.448143	-74.077667	No
2022-02-17 c1	Emx-POMT2-Ctrl	Emx-POMT2	12.481802	12.738301	2.0549837275098564	-65.350426	-73.928253	No
2022-02-17 c3	Emx-POMT2-Ctrl	Emx-POMT2	6.7625651	13.802426	104.1004529479502	-85.419739	-83.17234	Yes
2021-09-01 c1	ICD-Mutant	ICD	1.105334	3.2097054	190.38330495578708	-52.942158	-65.542213	Yes
2021-09-01 c3	ICD-Mutant	ICD	0.8284229	3.0259964	265.2719402131447	-58.654045000000004	-50.94809	Yes
2021-09-01 c4	ICD-Mutant	ICD	1.8519436	7.125526	284.7593414831855	-53.789272	-58.562237	Yes
2021-09-01 c5	ICD-Mutant	ICD	1.1542461	2.6343155	128.2282348625653	-71.007584	-51.42358	Yes
2021-09-02 c2	ICD-Ctrl	ICD	3.6325824	15.594454	329.2938819502071	-63.852089	-89.430557	Yes
2021-09-02 c3	ICD-Ctrl	ICD	1.9376082	11.376083	487.11988316316996	-57.079166	-73.407578	Yes
2021-09-02 c4	ICD-Ctrl	ICD	6.8110919	21.039862	208.90585986660963	-71.291901	-135.95453	Yes
2021-09-02 c5	ICD-Ctrl	ICD	4.592721	18.100519	294.11318475474553	-67.362419	-71.357048	Yes
2021-09-23 c1	ICD-Mutant	ICD	0.95667243	2.627383	174.63768345451325	-52.938099	-46.189388	Yes
2021-09-23 c2	ICD-Mutant	ICD	3.6880417	9.750433	164.37968421018667	-57.506729	-65.55172	Yes
2021-09-23 c3	ICD-Mutant	ICD	0.8665511	2.5857885	198.40000203104003	-60.625175	-61.986046	Yes
2021-09-23 c4	ICD-Mutant	ICD	0.88734835	1.4904679	67.96874643424987	-40.416847	-48.368984	Yes
2021-09-23 c5	ICD-Mutant	ICD	0.55805892	0.53379548	-4.347827645152599	-72.608391	-52.941391	No
2021-09-24 c1	ICD-Ctrl	ICD	2.0762565	11.649913	461.1018195487889	-84.985069	-93.121323	Yes
2021-09-24 c2	ICD-Ctrl	ICD	2.4367418	8.9809361	268.5633044912678	-60.646328	-83.575546	Yes
2021-09-24 c3	ICD-Ctrl	ICD	2.7348354	8.5476599	212.54750834364654	-64.893501	-58.441994	Yes
2021-09-24 c4	ICD-Ctrl	ICD	3.3622184	23.521664	599.5876294056329	-100.86654	-105.06917	Yes
2022-06-22 c1	ICD-Ctrl	ICD	5.0294628	12.25881	143.73994773358302	-51.708733	-47.274117	Yes
2022-06-22 c2	ICD-Ctrl	ICD	4.0901213	8.8908148	117.37288818304727	-57.022213	-67.599304	Yes
2022-06-23 c1	ICD-Mutant	ICD	5.9930677	3.4662046	-42.16309954249307	-61.673004	-65.550949	No
2022-06-23 c2	ICD-Mutant	ICD	1.5528597	4	157.58927223109725	-52.553108	-56.127514	Yes
2022-06-23 c3	ICD-Mutant	ICD	1.812825	6.0103989	231.5487650490257	-57.086552	-52.077271	Yes
2022-06-27 c1	ICD-Ctrl	ICD	5.3032928	13.445407	153.52941101045747	-63.757717	-64.359352	Yes
2022-06-27 c2	ICD-Ctrl	ICD	8.4644718	9.3197575	10.10441903770061	-61.40517	-58.991375	No
2022-06-27 c3	ICD-Ctrl	ICD	8.1421146	11.35182	39.42102951977612	-63.785019	-79.086151	Yes
2022-06-27 c4	ICD-Ctrl	ICD	7.4592724	22.97747	208.03902536124033	-68.395988	-80.797333	Yes
2022-06-27 c5	ICD-Ctrl	ICD	3.1334488	8	155.30974050062665	-46.705814	-65.176666	Yes
2022-06-28 c1	ICD-Mutant	ICD	4.0589256	4.1698442	2.7327083797741882	-55.866245	-52.326488	No
2022-06-28 c2	ICD-Mutant	ICD	1.6949739	2.6031196	53.578742421933455	-61.587036	-65.529945	Yes
2022-06-28 c3	ICD-Mutant	ICD	3.4384749	2.5199306	-26.713712524119348	-46.797733	-38.449921	No
2022-06-28 c4	ICD-Mutant	ICD	1.9792027	5.1369152	159.5446742266469	-45.983837	-54.386635	Yes
2022-06-28 c5	ICD-Mutant	ICD	3.8682842	6.083189	57.258068060252654	-52.521954	-50.80442	Yes
2022-06-29 c1	ICD-Ctrl	ICD	4.3951473	4.5545926	3.627757822815192	-64.166763	-71.201317	No
2022-06-29 c2	ICD-Ctrl	ICD	3.5043328	19.109186	445.3016905243703	-77.687668	-110.70367	Yes
2022-06-29 c4	ICD-Ctrl	ICD	3.2409012	14.939342	360.9625865793132	-67.768188	-80.278091	Yes
2022-06-30 c1	ICD-Mutant	ICD	1.3864818	7.9722705	475.00001081874996	-60.31208	-79.240494	Yes
2022-06-30 c2	ICD-Mutant	ICD	6.2599654	12.783362	104.2081893935069	-71.146446	-85.686714	Yes
2022-06-30 c3	ICD-Mutant	ICD	1.5389948	4.6343155	201.12613116041712	-43.474766	-47.662704	Yes
2022-03-28 c1	B4GAT1-Mutant	B4GAT1	5.7469673	18.613518	223.88418148820858	-53.633785	-89.715279	Yes
2022-03-28 c2	B4GAT1-Mutant	B4GAT1	2.5476604	3.1057193	21.90476014778109	-90.735229	-73.584915	Yes
2022-03-29 c1	B4GAT1-Ctrl	B4GAT1	4.4298096	7.778163	75.58684689292292	-59.62677	-76.617104	Yes
2022-03-29 c2	B4GAT1-Ctrl	B4GAT1	4.5476604	13.119584	188.49084685391196	-60.75914	-67.923462	Yes
2022-03-30 c1	B4GAT1-Mutant	B4GAT1	3.1681108	4.4679375	41.02844824745396	-61.29771	-57.064522	Yes
2022-03-30 c2	B4GAT1-Mutant	B4GAT1	7.4523396	3.3830156	-54.60465059858517	-60.992416	-54.33942	No
2022-03-31 c1	B4GAT1-Ctrl	B4GAT1	3.0271521	6.5164647	115.2671714117041	-67.354652	-87.277039	Yes
2022-03-31 c2	B4GAT1-Ctrl	B4GAT1	3.136915	4.9878683	59.005529317817015	-61.721104	-55.325893	Yes
2022-03-31 c3	B4GAT1-Ctrl	B4GAT1	4.8526864	5.6984401	17.428566989204175	-63.633568	-60.301517	No
2022-03-31 c4	B4GAT1-Ctrl	B4GAT1	5.6741767	11.005199	93.95234906942532	-57.700523	-70.573006	Yes
2022-07-04 c1	B4GAT1-Mutant	B4GAT1	4.8492203	5.4315424	12.008571769775026	-54.433979	-61.178253	No
2022-07-04 c3	B4GAT1-Mutant	B4GAT1	1.4974003	2.0623918	37.73149370946432	-57.033203	-49.551868	Yes
2022-07-04 c4	B4GAT1-Mutant	B4GAT1	3.5112653	3.4870017	-0.6910215528288287	-52.443417	-53.721172	No
2022-07-04 c5	B4GAT1-Mutant	B4GAT1	3.0259964	8.3812828	176.97596732104503	-55.352612	-62.510059	Yes
2022-07-05 c1	B4GAT1-Ctrl	B4GAT1	5.8232236	9.573657	64.40476371197562	-58.45586	-61.009956	Yes
2022-07-05 c2	B4GAT1-Ctrl	B4GAT1	7.0398612	3.778163	-46.33185381552693	-65.181709	-67.59977	No
2022-07-05 c3	B4GAT1-Ctrl	B4GAT1	3.2928944000000002	3.7123051	12.736840270371252	-66.911903	-48.42215	No
2022-07-05 c4	B4GAT1-Ctrl	B4GAT1	14.89428	14.353553	-3.630433965253778	-63.061638	-59.065155	No
2022-07-05 c5	B4GAT1-Ctrl	B4GAT1	0.65511262	1.5077989	130.15873209708585	-58.807911	-46.421947	Yes
2020-11-20 c2	FKRP-Ctrl	FKRP	4.9462738	20.734835	319.2011166062016	-68.813225	-83.690247	Yes
2020-11-20 c3	FKRP-Ctrl	FKRP	7.0987868	19.025997	168.01758576550012	-71.619148	-91.156029	Yes
2020-11-24 c1	FKRP-Ctrl	FKRP	6.5615253	8.5060663	29.635502586570855	-70.775612	-96.770119	Yes
2020-11-24 c2	FKRP-Ctrl	FKRP	4.3708839	4.4298096	1.3481415051998895	-66.263649	-67.971657	No
2020-11-24 c3	FKRP-Ctrl	FKRP	7.9688044	22.194107	178.51238261037003	-58.045319	-62.913235	Yes
2020-11-25 c1	FKRP-Mutant	FKRP	9.8509531	19.975737	102.77973915031632	-56.881355	-57.630363	Yes
2020-11-25 c2	FKRP-Mutant	FKRP	3.2512999	7.9272099	143.81663161863352	-67.025833	-109.96505	Yes
2020-11-25 c3	FKRP-Mutant	FKRP	2.0658579	9.2002974	345.3499633251638	-63.888611	-66.161232	Yes
2020-11-25 c4	FKRP-Mutant	FKRP	5.407279	11.785095	117.94871320677184	-74.802109	-86.577187	Yes
2021-03-23 c1	FKRP-Ctrl	FKRP	4.2564993	9.7642984	129.39739235949128	-49.57029	-58.532097	Yes
2021-03-23 c2	FKRP-Ctrl	FKRP	5.5285959	23.819757	330.8464107496082	-112.22091	-118.75342	Yes
2021-03-23 c3	FKRP-Ctrl	FKRP	3.3414211	23.053726	589.937763306756	-66.701645	-109.36111	Yes
2021-03-24 c2	FKRP-Mutant	FKRP	7.9480071	16.77643	111.07718940009505	-52.147652	-61.352856	Yes
2021-03-24 c3	FKRP-Mutant	FKRP	2.3948321	16.343155	582.4342716969594	-80.92189	-139.12532	Yes
2021-03-24 c4	FKRP-Mutant	FKRP	2.0923271	8.8353558	322.2741176558866	-69.657211	-127.63025	Yes
2021-03-29 c1	FKRP-Mutant	FKRP	20.12825	14.409012	-28.41398531914101	-69.466446	-58.309658	No
2021-03-29 c2	FKRP-Mutant	FKRP	1.7192374	3.0121317	75.20161555350063	-55.460171	-54.01915	Yes
2021-03-29 c3	FKRP-Mutant	FKRP	6.3951473	8.8908148	39.02439432474057	-57.039337	-64.156288	Yes
2021-03-30 c2	FKRP-Ctrl	FKRP	1.8994801	4.6169844	143.06568939574572	-73.672356	-49.995705	Yes
2022-08-02 c1	FKRP-Mutant	FKRP	5.3032928	11.729636	121.17647360522878	-66.604538	-62.17038	Yes
2022-08-02 c2	FKRP-Mutant	FKRP	1.6013864	1.965338	22.727281810311368	-58.608624	-56.39579	No
2022-08-03 c1	FKRP-Ctrl	FKRP	3.3275564	8.731369	162.3958229528431	-78.555405	-82.7127	Yes
2022-08-03 c2	FKRP-Ctrl	FKRP	5.0849218	7.916811	55.691892842875184	-56.330643	-64.879913	Yes
2022-08-03 c3	FKRP-Ctrl	FKRP	5.9549394	15.060658	152.91034867626024	-68.921074	-74.86557	Yes
