# Supplementary material for: Inhibitory CCK+ basket synapse defects in mouse models of dystroglycanopathy
Source: eLife. 2024 Jan 5;12:RP87965. doi: 10.7554/eLife.87965 (PMC10942650; doi:10.7554/eLife.87965)
Supplement: Figure 7—source data 1. [file elife-87965-fig7-data1.csv]

ExperimentDate	Experiment	Condition	Genotype	Sex	Latency (sec)	Died
2022-06-24T00:00:00Z	Emx-DG	Emx-DG-cKO	EMX-Cre+;DGF/-	F	408	survived
2022-06-24T00:00:00Z	Emx-DG	Emx-DG-Ctrl	DGF/+	F	898	survived
2022-07-18T00:00:00Z	Emx-DG	Emx-DG-cKO	EMX-Cre+;DGF/-	M	595	survived
2022-07-18T00:00:00Z	Emx-DG	Emx-DG-Ctrl	EMX-Cre+;DGF/+	M	795	survived
2022-07-20T00:00:00Z	B4GAT1	B4GAT1-Mut	B4GAT1M155T/M155T	M	905	survived
2022-07-20T00:00:00Z	B4GAT1	B4GAT1-Ctrl	WT	M	984	survived
2022-07-21T00:00:00Z	FKRP	FKRP-Mut	FKRPP448L/P448L	F	602	survived
2022-07-21T00:00:00Z	FKRP	FKRP-Ctrl	FKRPP448L/+	M	703	survived
2022-07-21T00:00:00Z	FKRP	FKRP-Mut	FKRPP448L/P448L	M	681	survived
2022-07-27T00:00:00Z	Emx-DG	Emx-DG-cKO	EMX-Cre+;DGF/-	M	294	survived
2022-07-27T00:00:00Z	Emx-DG	Emx-DG-Ctrl	EMX-Cre+;DGF/+	M	1051	survived
2022-08-16T00:00:00Z	ICD	ICD-Mut	DGdelta/-	F	730	survived
2022-08-16T00:00:00Z	ICD	ICD-Ctrl	WT	F	875	survived
2022-08-23T00:00:00Z	ICD	ICD-Mut	DGdelta/delta	F	513	survived
2022-08-23T00:00:00Z	ICD	ICD-Mut	DGdelta/delta	M	612	died
2022-08-23T00:00:00Z	ICD	ICD-Mut	DGdelta/delta	F	674	survived
2022-08-23T00:00:00Z	ICD	ICD-Ctrl	WT	F	785	survived
2022-08-23T00:00:00Z	ICD	ICD-Ctrl	DGdelta/+	M	976	died
2022-08-23T00:00:00Z	ICD	ICD-Ctrl	DGdelta/+	F	1170	survived
2022-08-30T00:00:00Z	FKRP	FKRP-Ctrl	WT	M	657	survived
2022-08-30T00:00:00Z	FKRP	FKRP-Mut	FKRPP448L/P448L	M	738	survived
2022-08-30T00:00:00Z	FKRP	FKRP-Ctrl	WT	F	786	survived
2022-08-30T00:00:00Z	FKRP	FKRP-Mut	FKRPP448L/P448L	F	1082	survived
2022-09-14T00:00:00Z	Emx-POMT2	Emx-POMT2-cKO	EMX-Cre+;POMT2F/F	F	581	survived
2022-09-14T00:00:00Z	Emx-POMT2	Emx-POMT2-Ctrl	EMX-Cre+;POMT2F/+	F	824	survived
2022-09-15T00:00:00Z	Emx-POMT2	Emx-POMT2-cKO	EMX-Cre+;POMT2F/F	F	476	survived
2022-09-15T00:00:00Z	B4GAT1	B4GAT1-Mut	B4GAT1M155T/M155T	F	705	survived
2022-09-15T00:00:00Z	Emx-POMT2	Emx-POMT2-Ctrl	EMX-Cre+;POMT2F/+	M	846	survived
2022-09-15T00:00:00Z	B4GAT1	B4GAT1-Ctrl	B4GAT1M155T/+	F	941	survived
2022-09-21T00:00:00Z	Emx-DG	Emx-DG-cKO	EMX-Cre+;DGF/-	F	479	survived
2022-09-21T00:00:00Z	Emx-DG	Emx-DG-Ctrl	DGF/+	F	572	survived
2022-09-21T00:00:00Z	B4GAT1	B4GAT1-Mut	B4GAT1M155T/M155T	M	622	died
2022-09-21T00:00:00Z	B4GAT1	B4GAT1-Ctrl	WT	M	1083	survived
2022-09-23T00:00:00Z	FKRP	FKRP-Mut	FKRPP448L/P448L	F	603	survived
2022-09-23T00:00:00Z	FKRP	FKRP-Ctrl	WT	F	705	survived
2022-10-04T00:00:00Z	B4GAT1	B4GAT1-Mut	B4GAT1M155T/M155T	M	794	died
2022-10-04T00:00:00Z	B4GAT1	B4GAT1-Ctrl	WT	M	859	survived
2022-10-13T00:00:00Z	Emx-DG	Emx-DG-cKO	EMX-Cre+;DGF/-	F	342	survived
2022-10-13T00:00:00Z	Emx-DG	Emx-DG-Ctrl	EMX-Cre+;DGF/+	M	491	survived
2022-10-13T00:00:00Z	Emx-DG	Emx-DG-Ctrl	EMX-Cre+;DGF/+	M	893	survived
2022-10-13T00:00:00Z	Emx-DG	Emx-DG-Ctrl	EMX-Cre+;DGF/+	F	860	survived
2022-11-08T00:00:00Z	ICD	ICD-Ctrl	WT	M	821	survived
2022-11-08T00:00:00Z	ICD	ICD-Mut	DGdelta/-	M	1109	survived
2022-11-09T00:00:00Z	Emx-POMT2	Emx-POMT2-Ctrl	EMX-Cre+;POMT2F/+	F	758	survived
2022-11-09T00:00:00Z	Emx-POMT2	Emx-POMT2-Ctrl	EMX-Cre+;POMT2F/+	F	793	survived
2022-11-09T00:00:00Z	Emx-POMT2	Emx-POMT2-cKO	EMX-Cre+;POMT2F/F	F	403	survived
2022-11-10T00:00:00Z	Emx-POMT2	Emx-POMT2-Ctrl	EMX-Cre+;POMT2F/+	F	1470	survived
2022-11-10T00:00:00Z	Emx-POMT2	Emx-POMT2-cKO	EMX-Cre+;POMT2F/F	F	393	survived
2022-11-10T00:00:00Z	Emx-POMT2	Emx-POMT2-cKO	EMX-Cre+;POMT2F/F	F	406	survived
2022-11-11T00:00:00Z	Emx-POMT2	Emx-POMT2-cKO	EMX-Cre+;POMT2F/F	M	479	survived
2022-11-11T00:00:00Z	Emx-POMT2	Emx-POMT2-cKO	EMX-Cre+;POMT2F/F	M	341	survived
2022-11-11T00:00:00Z	Emx-POMT2	Emx-POMT2-Ctrl	POMT2F/F	M	787	survived
2022-11-11T00:00:00Z	Emx-POMT2	Emx-POMT2-Ctrl	POMT2F/F	F	756	survived
2022-11-15T00:00:00Z	B4GAT1	B4GAT1-Mut	B4GAT1M155T/M155T	F	985	died
2022-11-15T00:00:00Z	B4GAT1	B4GAT1-Mut	B4GAT1M155T/M155T	F	1404	died
2022-11-15T00:00:00Z	B4GAT1	B4GAT1-Mut	B4GAT1M155T/M155T	F	765	died
2022-11-15T00:00:00Z	B4GAT1	B4GAT1-Mut	B4GAT1M155T/M155T	M	1062	survived
2022-11-15T00:00:00Z	B4GAT1	B4GAT1-Ctrl	WT	M	1093	survived
2022-11-15T00:00:00Z	B4GAT1	B4GAT1-Ctrl	WT	M	1086	survived
2022-11-15T00:00:00Z	B4GAT1	B4GAT1-Mut	B4GAT1M155T/M155T	M	931	survived
2022-11-29T00:00:00Z	Emx-DG	Emx-DG-Ctrl	EMX-Cre+;DGF/+	M	896	survived
2022-11-29T00:00:00Z	Emx-DG	Emx-DG-cKO	EMX-Cre+;DGF/-	M	538	survived
2022-11-29T00:00:00Z	Emx-DG	Emx-DG-cKO	EMX-Cre+;DGF/-	M	503	survived
2022-11-30T00:00:00Z	Emx-POMT2	Emx-POMT2-cKO	EMX-Cre+;POMT2F/F	F	587	survived
2022-11-30T00:00:00Z	Emx-POMT2	Emx-POMT2-Ctrl	EMX-Cre+;POMT2F/+	M	757	survived
2022-12-01T00:00:00Z	Emx-POMT2	Emx-POMT2-Ctrl	EMX-Cre+;POMT2F/+	M	730	survived
2022-12-01T00:00:00Z	Emx-POMT2	Emx-POMT2-cKO	EMX-Cre+;POMT2F/F	M	347	survived
2023-01-10T00:00:00Z	Emx-DG	Emx-DG-cKO	EMX-Cre+;DGF/-	F	675	survived
2023-01-10T00:00:00Z	Emx-DG	Emx-DG-Ctrl	EMX-Cre+;DGF/+	F	472	survived
2023-01-10T00:00:00Z	Emx-DG	Emx-DG-Ctrl	DGF/+	F	1506	survived
2023-01-10T00:00:00Z	Emx-DG	Emx-DG-cKO	EMX-Cre+;DGF/-	F	569	survived
2023-01-10T00:00:00Z	Emx-DG	Emx-DG-Ctrl	DGF/+	M	647	survived
2023-01-10T00:00:00Z	Emx-DG	Emx-DG-cKO	EMX-Cre+;DGF/-	M	265	survived
2023-01-10T00:00:00Z	Emx-DG	Emx-DG-cKO	EMX-Cre+;DGF/-	M	263	survived
2023-01-12T00:00:00Z	FKRP	FKRP-Mut	FKRPP448L/P448L	M	752	survived
2023-01-12T00:00:00Z	FKRP	FKRP-Mut	FKRPP448L/P448L	M	705	survived
2023-01-12T00:00:00Z	FKRP	FKRP-Ctrl	FKRPP448L/+	M	697	survived
2023-01-12T00:00:00Z	FKRP	FKRP-Ctrl	FKRPP448L/+	F	1078	survived
2023-01-12T00:00:00Z	FKRP	FKRP-Mut	FKRPP448L/P448L	F	515	survived
2023-01-12T00:00:00Z	FKRP	FKRP-Mut	FKRPP448L/P448L	F	480	survived
2023-01-17T00:00:00Z	Emx-DG	Emx-DG-cKO	EMX-Cre+;DGF/-	F	639	survived
2023-01-17T00:00:00Z	Emx-DG	Emx-DG-Ctrl	EMX-Cre+;DGF/+	M	675	survived
2023-01-17T00:00:00Z	Emx-DG	Emx-DG-cKO	EMX-Cre+;DGF/-	F	233	survived
2023-01-24T00:00:00Z	Emx-DG	Emx-DG-cKO	EMX-Cre+;DGF/-	M	534	survived
2023-01-24T00:00:00Z	Emx-DG	Emx-DG-Ctrl	EMX-Cre+;DGF/+	F	946	survived
