# Supplementary material for: Inhibitory CCK+ basket synapse defects in mouse models of dystroglycanopathy
Source: eLife. 2024 Jan 5;12:RP87965. doi: 10.7554/eLife.87965 (PMC10942650; doi:10.7554/eLife.87965)
Supplement: Supplementary file 1. [file elife-87965-supp1.xlsx]

## Sheet: Ns
Western Blots:
	Fig 1 B-D		Fig 1S2 B-D
	P0 WGA		P21 WGA
	Nanimals	Tech. Reps.	Nanimals	Tech. Reps.
Dag1WT	3	3	3	3
Emx1Cre;Dag1cKO	3	3	3	3
Emx1Cre;Pomt2cKO	3	3	3	3
Dag1cyto/-	NA	NA	3	3
B4gat1M155T/M155T	3	3	NA	NA
FkrpP448L/P448L	3	3	NA	NA
Immunohistochemistry (IHC):
	Fig 2C			Fig 2B			Fig 3C			Fig 3S3B			Fig 5DEF; Fig 5S1A-C			Fig 5S2D-E, Fig 5S3A-B
	Cux1			Tbr1			CB1R			PV			VGAT, CB1R			VGAT, PV
	Nanimals, NROIs	Nmale, Nfemale	Tech. Reps.	Nanimals, NROIs	Nmale, Nfemale	Tech. Reps.	Nanimals, NROIs	Nmale, Nfemale	Tech. Reps.	Nanimals, NROIs	Nmale, Nfemale	Tech. Reps.	Nanimals, NROIs	Nmale, Nfemale	Tech. Reps.	Nanimals, NROIs	Nmale, Nfemale	Tech. Reps.
Emx1Cre;Dag1Ctrl	4, 15	1, 3	3	4, 15	1, 3	3	4, 12	1, 3	3	3, 24	2, 1	4	4, 15	1, 3	3	6, 30	2, 4	5
Emx1Cre;Dag1cKO	5, 20	1, 4	3	5, 20	1, 4	3	5, 18	1, 4	3	3, 15	2, 1	4	5, 16	1, 4	3	6, 22	2, 4	5
Emx1Cre;Pomt2Ctrl	4, 16	0, 4	3	5, 24	0, 5	4	4, 16	0, 4	3	5, 20	0, 5	3	4, 16	0, 4	3	5, 20	0, 5	3
Emx1Cre;Pomt2cKO	3, 12	0, 3	3	3, 16	0, 3	4	3, 12	0, 3	3	3, 12	0, 3	3	3, 12	3, 0	3	3, 12	3, 0	3
Dag1WT	3, 12	0, 3	2	3, 12	0, 3	2	3, 12	0, 3	2	3, 12	0, 3	2	3, 12	0, 3	2	3, 12	0, 3	2
Dag1cyto/-	3, 12	0, 3	2	3, 12	0, 3	2	3, 12	0, 3	2	3, 12	0, 3	2	3, 12	0, 3	2	3, 12	0, 3	2
B4gat1WT	3, 12	1, 2	2	3, 12	1, 2	2	3, 12	1, 2	2	3, 12	1, 2	2	3, 12	1, 2	2	3, 12	1, 2	2
B4gat1M155T/M155T	5, 20	2, 3	2	5, 20	2, 3	2	5, 20	2, 3	2	5, 20	2, 3	2	3, 12	2, 1	2	5, 20	2, 3	2
FkrpWT	4, 16	4, 0	2	4, 16	4, 0	2	4, 16	4, 0	2	4, 15	4, 0	2	3, 12	3, 0	2	4, 15	4, 0	2
FkrpP448L/P448L	3, 12	3, 0	2	3, 12	3, 0	2	3, 12	0, 3	2	3, 11	0, 3	2	3, 12	0, 3	2	3, 12	0, 3	2
IHC - Interneuron Cell Counts:
	Fig 3S2B,E-F
	NECAB1/PV		NECAB2		PV
	Nanimals, NROIs	Tech. Reps.	Nanimals, NROIs	Tech. Reps.	Nanimals, NROIs	Tech. Reps.
Emx1Cre;Dag1Ctrl	3, 12	1	3, 12	1	3, 12	3
Emx1Cre;Dag1cKO	3, 11	1	3, 12	1	4, 12	3
IHC - Developmental Timepoints:
	Fig 4C
	P5 CB1R		P10 CB1R		P15 CB1R		P30 CB1R
	Nanimals, NROIs	Tech. Reps.	Nanimals, NROIs	Tech. Reps.	Nanimals, NROIs	Tech. Reps.	Nanimals, NROIs	Tech. Reps.
Emx1Cre;Dag1Ctrl	3, 32	3	3, 30	3	4, 45	3	4, 44	3
Emx1Cre;Dag1cKO	4, 43	3	4, 44	3	4, 44	3	4, 39	3
Electrophysiology, Flurothyl:
	Fig 6B-C, Fig 6S1A-B			Fig 7A
	Physiology			Flurothyl
	Nanimals, Ncells	Nmale, Nfemale	Tech. Reps.	Nanimals	Nmale, Nfemale	Tech. Reps.
Emx1Cre;Dag1Ctrl	8, 21	4, 4	8	12	7, 5	9
Emx1Cre;Dag1cKO	8, 22	6, 2	8	14	7, 7	9
Emx1Cre;Pomt2Ctrl	3, 11	1, 2	3	8	4, 5	7
Emx1Cre;Pomt2cKO	4, 10	1, 3	4	9	3, 6	7
Dag1WT	5, 18	4, 1	5	4	1, 3	2
Dag1cyto/-	5, 20	4, 1	5	4	1, 3	2
B4gat1WT	3, 11	2, 1	3	6	5, 1	5
B4gat1M155T/M155T	3, 8	1, 2	3	8	5, 3	5
FkrpWT	5, 12	2, 3	5	5	3, 2	4
FkrpP448L/P448L	4, 12	1, 3	4	8	4, 4	4
Pooled genotypes:
			Fig 7S1B
			Flurothyl
			Nanimals
Emx1Cre;Dag1Ctrl	Emx1Cre;Dag1Flox/+		9
	Dag1Flox/+		3
Emx1Cre;Dag1cKO	Emx1Cre;Dag1cKO		14
Emx1Cre;Pomt2Ctrl	Emx1Cre;Pomt2Flox/+		6
	Pomt2Flox/Flox		2
Emx1Cre;Pomt2cKO	Emx1Cre;Pomt2Flox/Flox		9
Dag1cyto-Ctrl	Dag1WT		2
	Dag1cyto/+		2
Dag1cyto-Mut	Dag1cyto/-		1
	Dag1cyto/cyto		3
B4gat1Ctrl	B4gat1WT		5
	B4gat1M155T/+		1
B4gat1Mut	B4gat1M155T/M155T		8
FkrpCtrl	FkrpWT		3
	FkrpP448L/+		2
FkrpMut	FkrpP448L/P448L		8
