# Supplementary material for: Inhibitory CCK+ basket synapse defects in mouse models of dystroglycanopathy
Source: eLife. 2024 Jan 5;12:RP87965. doi: 10.7554/eLife.87965 (PMC10942650; doi:10.7554/eLife.87965)
Supplement: Supplementary file 2. [file elife-87965-supp2.xlsx]

## Sheet: Fig1
Analysis	test	term		p.value	significance	df	sumsq	meansq	f.statistic
IIH6	One-way ANOVA	Genotype		1.19865e-06	***	5	1.88848	0.0755392	1122.07
IIH6	One-way ANOVA	Residuals		NA	NS	12	0.00969429	6.73215e-05	NA
b-Dag1	One-way ANOVA	Genotype		2.56883e-05	***	5	12.0045	0.480181	357.64
b-Dag1	One-way ANOVA	Residuals		NA	NS	12	0.19334	0.00134264	NA
Analysis	test	Genotype1	Genotype2	adj.p.value	significance	null.value	estimate	conf.low	conf.high
IIH6	One-way ANOVA with Tukey post-hoc	Emx-DG-cKO	WT	2.30088e-12	***	0	0.660712	1.12628	0.318568
IIH6	One-way ANOVA with Tukey post-hoc	Emx-POMT2-cKO	WT	2.61689e-09	***	0	0.338598	0.689424	0.111201
IIH6	One-way ANOVA with Tukey post-hoc	Emx-POMT2-cKO	Emx-DG-cKO	0.00548496	NS	0	0.0533377	0.000305332	0.229799
IIH6	One-way ANOVA with Tukey post-hoc	ICD-Mutant	WT	1.00879e-11	***	0	0.576534	1.0155	0.260993
IIH6	One-way ANOVA with Tukey post-hoc	ICD-Mutant	Emx-DG-cKO	0.950712	NS	0	0.00286687	0.0379783	0.0911838
IIH6	One-way ANOVA with Tukey post-hoc	ICD-Mutant	Emx-POMT2-cKO	0.0530987	NS	0	0.0314731	0.181331	0.0050434
IIH6	One-way ANOVA with Tukey post-hoc	B4GAT1-Mutant	WT	1.06553e-10	***	0	0.462054	0.861497	0.186039
IIH6	One-way ANOVA with Tukey post-hoc	B4GAT1-Mutant	Emx-DG-cKO	0.250333	NS	0	0.0177146	0.0133003	0.145557
IIH6	One-way ANOVA with Tukey post-hoc	B4GAT1-Mutant	Emx-POMT2-cKO	0.589765	NS	0	0.00957526	0.119908	0.0226714
IIH6	One-way ANOVA with Tukey post-hoc	B4GAT1-Mutant	ICD-Mutant	0.777796	NS	0	0.00632871	0.0285171	0.107569
IIH6	One-way ANOVA with Tukey post-hoc	FKRP-Mutant	WT	4.49679e-06	**	0	0.151575	0.406724	0.0198535
IIH6	One-way ANOVA with Tukey post-hoc	FKRP-Mutant	Emx-DG-cKO	1.06434e-06	**	0	0.179366	0.0306573	0.451502
IIH6	One-way ANOVA with Tukey post-hoc	FKRP-Mutant	Emx-POMT2-cKO	0.028789	NS	0	0.0370817	0.00312004	0.194472
IIH6	One-way ANOVA with Tukey post-hoc	FKRP-Mutant	ICD-Mutant	1.03858e-05	**	0	0.13688	0.0147742	0.382414
IIH6	One-way ANOVA with Tukey post-hoc	FKRP-Mutant	B4GAT1-Mutant	0.000368177	*	0	0.0843434	0.00176366	0.290352
b-Dag1	One-way ANOVA with Tukey post-hoc	Emx-DG-cKO	WT	0.000743509	*	0	0.337835	1.22372	0.00316459
b-Dag1	One-way ANOVA with Tukey post-hoc	Emx-POMT2-cKO	WT	0.3977	NS	0	0.06022	0.0781671	0.593484
b-Dag1	One-way ANOVA with Tukey post-hoc	Emx-POMT2-cKO	Emx-DG-cKO	4.1559e-06	**	0	0.683324	0.0909942	1.82686
b-Dag1	One-way ANOVA with Tukey post-hoc	ICD-Mutant	WT	1.73551e-07	***	0	0.979741	2.29462	0.216073
b-Dag1	One-way ANOVA with Tukey post-hoc	ICD-Mutant	Emx-DG-cKO	0.0278775	NS	0	0.166939	0.871541	0.0135488
b-Dag1	One-way ANOVA with Tukey post-hoc	ICD-Mutant	Emx-POMT2-cKO	2.39079e-09	***	0	1.52576	3.0983	0.504433
b-Dag1	One-way ANOVA with Tukey post-hoc	B4GAT1-Mutant	WT	0.885746	NS	0	0.0194641	0.148585	0.441554
b-Dag1	One-way ANOVA with Tukey post-hoc	B4GAT1-Mutant	Emx-DG-cKO	3.7218e-05	**	0	0.519481	0.0383253	1.55185
b-Dag1	One-way ANOVA with Tukey post-hoc	B4GAT1-Mutant	Emx-POMT2-cKO	0.962828	NS	0	0.0112114	0.397991	0.175643
b-Dag1	One-way ANOVA with Tukey post-hoc	B4GAT1-Mutant	ICD-Mutant	1.41535e-08	***	0	1.27539	0.36524	2.73675
b-Dag1	One-way ANOVA with Tukey post-hoc	FKRP-Mutant	WT	0.999985	NS	0	0.000431396	0.297845	0.254229
b-Dag1	One-way ANOVA with Tukey post-hoc	FKRP-Mutant	Emx-DG-cKO	0.00116482	*	0	0.314122	0.00125916	1.1782
b-Dag1	One-way ANOVA with Tukey post-hoc	FKRP-Mutant	Emx-POMT2-cKO	0.307421	NS	0	0.0708453	0.625917	0.0669845
b-Dag1	One-way ANOVA with Tukey post-hoc	FKRP-Mutant	ICD-Mutant	2.56231e-07	***	0	0.939055	0.197195	2.23213
b-Dag1	One-way ANOVA with Tukey post-hoc	FKRP-Mutant	B4GAT1-Mutant	0.810871	NS	0	0.0256909	0.469589	0.133004

## Sheet: Fig1S2
Analysis	test	term		p.value	significance	df	sumsq	meansq	f.statistic
IIH6	One-way ANOVA	Genotype		2.30824e-12	***	9	6.07627	0.675141	8500.24
IIH6	One-way ANOVA	Residuals		NA	NS	64	0.00508327	7.94261e-05	NA
b-Dag1	One-way ANOVA	Genotype		2.60669e-17	***	9	6.11297	0.679219	153812
b-Dag1	One-way ANOVA	Residuals		NA	NS	64	0.000282617	4.41589e-06	NA
Analysis	test	Genotype1	Genotype2	adj.p.value	significance	null.value	estimate	conf.low	conf.high
IIH6	One-way ANOVA with Tukey post-hoc	Emx-DG-cKO	WT	3.12298e-11	***	0	1.0003	1.55498	0.567474
IIH6	One-way ANOVA with Tukey post-hoc	Emx-POMT2-cKO	WT	6.33684e-11	***	0	0.910766	1.44283	0.500558
IIH6	One-way ANOVA with Tukey post-hoc	Emx-POMT2-cKO	Emx-DG-cKO	0.866778	NS	0	0.00209828	0.040414	0.0856418
IIH6	One-way ANOVA with Tukey post-hoc	ICD-Mutant	WT	0.0649855	NS	0	0.0244148	0.162483	0.00820597
IIH6	One-way ANOVA with Tukey post-hoc	ICD-Mutant	Emx-DG-cKO	4.04368e-10	***	0	0.712159	0.356476	1.1897
IIH6	One-way ANOVA with Tukey post-hoc	ICD-Mutant	Emx-POMT2-cKO	9.3232e-10	***	0	0.636945	0.303875	1.09187
b-Dag1	One-way ANOVA with Tukey post-hoc	Emx-DG-cKO	WT	1.98223e-15	***	0	0.752831	0.975195	0.559201
b-Dag1	One-way ANOVA with Tukey post-hoc	Emx-POMT2-cKO	WT	0.325407	NS	0	0.0024827	0.0287939	0.00490481
b-Dag1	One-way ANOVA with Tukey post-hoc	Emx-POMT2-cKO	Emx-DG-cKO	5.20509e-15	***	0	0.668849	0.487163	0.879268
b-Dag1	One-way ANOVA with Tukey post-hoc	ICD-Mutant	WT	4.03753e-16	***	0	0.976931	1.22824	0.754357
b-Dag1	One-way ANOVA with Tukey post-hoc	ICD-Mutant	Emx-DG-cKO	0.00234024	*	0	0.0145781	0.0578887	7.72114e-07
b-Dag1	One-way ANOVA with Tukey post-hoc	ICD-Mutant	Emx-POMT2-cKO	7.01277e-16	***	0	0.880917	1.12028	0.670287

## Sheet: Fig2
Analysis	test	Experiment	term		p.value	significance	df	sumsq	meansq	f.statistic
CUX1	Two-way ANOVA	B4GAT1	Genotype		0.00382312	NS	1	3.50179e+09	3.50179e+09	12.1803
CUX1	Two-way ANOVA	B4GAT1	Percent		0	***	81	2.44266e+16	3.01563e+14	1.04893e+06
CUX1	Two-way ANOVA	B4GAT1	Genotype:Percent		0.11332	NS	81	2.9785e+10	3.67716e+08	1.27903
CUX1	Two-way ANOVA	B4GAT1	Residuals		NA	NS	10112400	2.90727e+15	2.87496e+08	NA
CUX1	Two-way ANOVA	Emx-DG	Genotype		1.92784e-177	***	1	1.312e+13	1.312e+13	180172
CUX1	Two-way ANOVA	Emx-DG	Percent		0	***	81	4.66274e+14	5.75647e+12	79051
CUX1	Two-way ANOVA	Emx-DG	Genotype:Percent		0	***	81	5.881e+14	7.26049e+12	99705.2
CUX1	Two-way ANOVA	Emx-DG	Residuals		NA	NS	12110400	881874558293248	7.28196e+07	NA
CUX1	Two-way ANOVA	Emx-POMT2	Genotype		4.42945e-241	***	1	1.56259e+13	1.56259e+13	365115
CUX1	Two-way ANOVA	Emx-POMT2	Percent		0	***	81	715439067710990	8.83258e+12	206382
CUX1	Two-way ANOVA	Emx-POMT2	Genotype:Percent		0	***	81	1.74958e+14	2.15998e+12	50470
CUX1	Two-way ANOVA	Emx-POMT2	Residuals		NA	NS	7728400	3.30754e+14	4.27973e+07	NA
CUX1	Two-way ANOVA	FKRP	Genotype		0.110192	NS	1	1.90228e+08	1.90228e+08	0.886605
CUX1	Two-way ANOVA	FKRP	Percent		0	***	81	2.47514e+16	3.05573e+14	1.4242e+06
CUX1	Two-way ANOVA	FKRP	Genotype:Percent		6.90506e-47	***	81	3.83555e+12	4.73524e+10	220.698
CUX1	Two-way ANOVA	FKRP	Residuals		NA	NS	7728400	1658189706948603	2.14558e+08	NA
CUX1	Two-way ANOVA	ICD	Genotype		0.00217821	*	1	1.50876e+09	1.50876e+09	15.6921
CUX1	Two-way ANOVA	ICD	Percent		0	***	81	1.13651e+16	1.4031e+14	1.45931e+06
CUX1	Two-way ANOVA	ICD	Genotype:Percent		0.0399107	NS	81	1.44513e+10	1.78411e+08	1.85559
CUX1	Two-way ANOVA	ICD	Residuals		NA	NS	5664400	5.44619e+14	9.61478e+07	NA
TBR1	Two-way ANOVA	B4GAT1	Genotype		5.61108e-18	***	1	8.19014e+10	8.19014e+10	1285.23
TBR1	Two-way ANOVA	B4GAT1	Percent		0	***	81	6.53338e+13	8.0659e+11	12657.4
TBR1	Two-way ANOVA	B4GAT1	Genotype:Percent		1.1604e-07	***	81	6.02882e+10	7.44299e+08	11.6799
TBR1	Two-way ANOVA	B4GAT1	Residuals		NA	NS	10112400	6.44412e+14	6.37249e+07	NA
TBR1	Two-way ANOVA	Emx-DG	Genotype		7.82091e-32	***	1	6.67017e+11	6.67017e+11	4569.69
TBR1	Two-way ANOVA	Emx-DG	Percent		2.00975e-295	***	81	9.17151e+13	1.13229e+12	7757.21
TBR1	Two-way ANOVA	Emx-DG	Genotype:Percent		1.94224e-193	***	81	3.80998e+13	4.70368e+11	3222.46
TBR1	Two-way ANOVA	Emx-DG	Residuals		NA	NS	12110400	1767701064373547	1.45966e+08	NA
TBR1	Two-way ANOVA	Emx-POMT2	Genotype		2.33091e-17	***	1	5.37766e+12	5.37766e+12	1184.03
TBR1	Two-way ANOVA	Emx-POMT2	Percent		3.28659e-156	***	81	7.61368e+14	9.3996e+12	2069.57
TBR1	Two-way ANOVA	Emx-POMT2	Genotype:Percent		6.0679e-20	***	81	1.87557e+13	2.31552e+11	50.9821
TBR1	Two-way ANOVA	Emx-POMT2	Residuals		NA	NS	15840400	7.19443e+16	4.54182e+09	NA
TBR1	Two-way ANOVA	FKRP	Genotype		0.553428	NS	1	5.70334e+06	5.70334e+06	0.0113905
TBR1	Two-way ANOVA	FKRP	Percent		0	***	81	1.96281e+15	2.42323e+13	48395.8
TBR1	Two-way ANOVA	FKRP	Genotype:Percent		9.19583e-12	***	81	9.02669e+11	1.11441e+10	22.2565
TBR1	Two-way ANOVA	FKRP	Residuals		NA	NS	7728400	3.86969e+15	5.00711e+08	NA
TBR1	Two-way ANOVA	ICD	Genotype		0.571306	NS	1	1.32826e+06	1.32826e+06	0.0093518
TBR1	Two-way ANOVA	ICD	Percent		0	***	81	7.87568e+14	9.72306e+12	68456.6
TBR1	Two-way ANOVA	ICD	Genotype:Percent		3.58796e-07	***	81	1.22258e+11	1.50936e+09	10.6269
TBR1	Two-way ANOVA	ICD	Residuals		NA	NS	5664400	8.04529e+14	1.42032e+08	NA
Figure	test	Genotype1	Genotype2	Percent	adj.p.value	significance	null.value	estimate	conf.low	conf.high
CUX1	Two-way ANOVA with Tukey post-hoc	Emx-DG-Ctrl	Emx-DG-cKO	(0,10]	0.724158	NS	0	3107.77	22582.8	1503.98
CUX1	Two-way ANOVA with Tukey post-hoc	Emx-DG-Ctrl	Emx-DG-cKO	(10,20]	2.78431e-11	***	0	22640.5	60023.2	3129.19
CUX1	Two-way ANOVA with Tukey post-hoc	Emx-DG-Ctrl	Emx-DG-cKO	(20,30]	0.00266129	NS	0	8886.06	35643.4	0.0689848
CUX1	Two-way ANOVA with Tukey post-hoc	Emx-DG-Ctrl	Emx-DG-cKO	(30,40]	0.0728808	NS	0	6062.25	29718	277.826
CUX1	Two-way ANOVA with Tukey post-hoc	Emx-DG-Ctrl	Emx-DG-cKO	(40,50]	0.971389	NS	0	1872.18	18988.1	2627.57
CUX1	Two-way ANOVA with Tukey post-hoc	Emx-DG-Ctrl	Emx-DG-cKO	(50,60]	3.96825e-25	***	0	90994.5	42900.5	156960
CUX1	Two-way ANOVA with Tukey post-hoc	Emx-DG-Ctrl	Emx-DG-cKO	(60,70]	3.3857e-25	***	0	132736	72792.7	210551
CUX1	Two-way ANOVA with Tukey post-hoc	Emx-DG-Ctrl	Emx-DG-cKO	(70,80]	3.06256e-16	***	0	31377.8	6824.27	73802.5
CUX1	Two-way ANOVA with Tukey post-hoc	Emx-DG-Ctrl	Emx-DG-cKO	(80,90]	1.28349e-09	***	0	19774.9	2124.71	55296.3
CUX1	Two-way ANOVA with Tukey post-hoc	Emx-DG-Ctrl	Emx-DG-cKO	(90,100]	0.0110258	NS	0	7732.04	43.5147	33291.9
CUX1	Two-way ANOVA with Tukey post-hoc	Emx-POMT2-Ctrl	Emx-POMT2-cKO	(0,10]	1	NS	0	422.03	13789.6	5828.15
CUX1	Two-way ANOVA with Tukey post-hoc	Emx-POMT2-Ctrl	Emx-POMT2-cKO	(10,20]	0.131504	NS	0	5735.69	29797.7	447.381
CUX1	Two-way ANOVA with Tukey post-hoc	Emx-POMT2-Ctrl	Emx-POMT2-cKO	(20,30]	0.988741	NS	0	1657.26	18932.4	3155.77
CUX1	Two-way ANOVA with Tukey post-hoc	Emx-POMT2-Ctrl	Emx-POMT2-cKO	(30,40]	0.975359	NS	0	1899.42	19731.3	2841.25
CUX1	Two-way ANOVA with Tukey post-hoc	Emx-POMT2-Ctrl	Emx-POMT2-cKO	(40,50]	0.999994	NS	0	584.404	14655.6	5286.93
CUX1	Two-way ANOVA with Tukey post-hoc	Emx-POMT2-Ctrl	Emx-POMT2-cKO	(50,60]	1.01882e-25	***	0	63795.5	24240	122125
CUX1	Two-way ANOVA with Tukey post-hoc	Emx-POMT2-Ctrl	Emx-POMT2-cKO	(60,70]	1.54341e-26	***	0	114228	58124.9	189105
CUX1	Two-way ANOVA with Tukey post-hoc	Emx-POMT2-Ctrl	Emx-POMT2-cKO	(70,80]	6.98696e-22	***	0	44692.6	13114.9	95043.9
CUX1	Two-way ANOVA with Tukey post-hoc	Emx-POMT2-Ctrl	Emx-POMT2-cKO	(80,90]	4.05969e-07	***	0	16364.4	963.33	50539.1
CUX1	Two-way ANOVA with Tukey post-hoc	Emx-POMT2-Ctrl	Emx-POMT2-cKO	(90,100]	0.998842	NS	0	1164.11	3939.66	17162.2
CUX1	Two-way ANOVA with Tukey post-hoc	B4GAT1-Ctrl	B4GAT1-Mutant	(0,10]	1	NS	0	76.9115	18085.3	23110.5
CUX1	Two-way ANOVA with Tukey post-hoc	B4GAT1-Ctrl	B4GAT1-Mutant	(10,20]	1	NS	0	440.367	26973.6	14949.1
CUX1	Two-way ANOVA with Tukey post-hoc	B4GAT1-Ctrl	B4GAT1-Mutant	(20,30]	1	NS	0	300.124	25784.6	15857.7
CUX1	Two-way ANOVA with Tukey post-hoc	B4GAT1-Ctrl	B4GAT1-Mutant	(30,40]	1	NS	0	0.178436	20642.2	20400.2
CUX1	Two-way ANOVA with Tukey post-hoc	B4GAT1-Ctrl	B4GAT1-Mutant	(40,50]	1	NS	0	282.812	15985.7	25622
CUX1	Two-way ANOVA with Tukey post-hoc	B4GAT1-Ctrl	B4GAT1-Mutant	(50,60]	1	NS	0	4.97918	19886.7	21165.3
CUX1	Two-way ANOVA with Tukey post-hoc	B4GAT1-Ctrl	B4GAT1-Mutant	(60,70]	1	NS	0	941.612	30254.2	12671.1
CUX1	Two-way ANOVA with Tukey post-hoc	B4GAT1-Ctrl	B4GAT1-Mutant	(70,80]	1	NS	0	67.1445	22935.8	18240.5
CUX1	Two-way ANOVA with Tukey post-hoc	B4GAT1-Ctrl	B4GAT1-Mutant	(80,90]	1	NS	0	891.94	29969.5	12856.4
CUX1	Two-way ANOVA with Tukey post-hoc	B4GAT1-Ctrl	B4GAT1-Mutant	(90,100]	1	NS	0	84.0524	23231.7	17978.4
CUX1	Two-way ANOVA with Tukey post-hoc	FKRP-Ctrl	FKRP-Mutant	(0,10]	0.999999	NS	0	859.109	11508.9	27523
CUX1	Two-way ANOVA with Tukey post-hoc	FKRP-Ctrl	FKRP-Mutant	(10,20]	1	NS	0	81.6111	21206.3	16270.5
CUX1	Two-way ANOVA with Tukey post-hoc	FKRP-Ctrl	FKRP-Mutant	(20,30]	0.999842	NS	0	1752.7	31846.3	8972.76
CUX1	Two-way ANOVA with Tukey post-hoc	FKRP-Ctrl	FKRP-Mutant	(30,40]	0.999232	NS	0	2180.95	33595.5	8080.08
CUX1	Two-way ANOVA with Tukey post-hoc	FKRP-Ctrl	FKRP-Mutant	(40,50]	0.874413	NS	0	5253.53	43710.8	4109.93
CUX1	Two-way ANOVA with Tukey post-hoc	FKRP-Ctrl	FKRP-Mutant	(50,60]	0.736278	NS	0	6366.73	46821.1	3226.03
CUX1	Two-way ANOVA with Tukey post-hoc	FKRP-Ctrl	FKRP-Mutant	(60,70]	1	NS	0	46.5582	20567.4	16839.4
CUX1	Two-way ANOVA with Tukey post-hoc	FKRP-Ctrl	FKRP-Mutant	(70,80]	0.999957	NS	0	1476.29	9636.84	30629.4
CUX1	Two-way ANOVA with Tukey post-hoc	FKRP-Ctrl	FKRP-Mutant	(80,90]	0.98549	NS	0	3438.9	6075.85	38115.6
CUX1	Two-way ANOVA with Tukey post-hoc	FKRP-Ctrl	FKRP-Mutant	(90,100]	0.596345	NS	0	7305.56	2612.99	49311.8
CUX1	Two-way ANOVA with Tukey post-hoc	ICD-Ctrl	ICD-Mutant	(0,10]	1	NS	0	15.706	12939.7	11199.3
CUX1	Two-way ANOVA with Tukey post-hoc	ICD-Ctrl	ICD-Mutant	(10,20]	1	NS	0	26.0867	10958.4	13201.4
CUX1	Two-way ANOVA with Tukey post-hoc	ICD-Ctrl	ICD-Mutant	(20,30]	1	NS	0	48.7675	13635.9	10569.1
CUX1	Two-way ANOVA with Tukey post-hoc	ICD-Ctrl	ICD-Mutant	(30,40]	1	NS	0	46.5812	10601.7	13599
CUX1	Two-way ANOVA with Tukey post-hoc	ICD-Ctrl	ICD-Mutant	(40,50]	1	NS	0	217.748	15511.7	9031.34
CUX1	Two-way ANOVA with Tukey post-hoc	ICD-Ctrl	ICD-Mutant	(50,60]	0.997191	NS	0	1692.92	22781.3	4712.08
CUX1	Two-way ANOVA with Tukey post-hoc	ICD-Ctrl	ICD-Mutant	(60,70]	1	NS	0	6.88693	12636.9	11484.4
CUX1	Two-way ANOVA with Tukey post-hoc	ICD-Ctrl	ICD-Mutant	(70,80]	1	NS	0	254.876	15814.2	8803.1
CUX1	Two-way ANOVA with Tukey post-hoc	ICD-Ctrl	ICD-Mutant	(80,90]	1	NS	0	258.275	15840.9	8783.21
CUX1	Two-way ANOVA with Tukey post-hoc	ICD-Ctrl	ICD-Mutant	(90,100]	1	NS	0	83.0922	10135.3	14138.4
TBR1	Two-way ANOVA with Tukey post-hoc	Emx-DG-Ctrl	Emx-DG-cKO	(0,10]	0.999443	NS	0	1454.89	5694.59	23027.6
TBR1	Two-way ANOVA with Tukey post-hoc	Emx-DG-Ctrl	Emx-DG-cKO	(10,20]	4.94108e-05	**	0	17249.3	314.39	59996.6
TBR1	Two-way ANOVA with Tukey post-hoc	Emx-DG-Ctrl	Emx-DG-cKO	(20,30]	0.296737	NS	0	6582.07	1054.66	37921.9
TBR1	Two-way ANOVA with Tukey post-hoc	Emx-DG-Ctrl	Emx-DG-cKO	(30,40]	0.193127	NS	0	7313.96	39651.6	788.701
TBR1	Two-way ANOVA with Tukey post-hoc	Emx-DG-Ctrl	Emx-DG-cKO	(40,50]	0.224777	NS	0	7064.96	39069	873.332
TBR1	Two-way ANOVA with Tukey post-hoc	Emx-DG-Ctrl	Emx-DG-cKO	(50,60]	0.874103	NS	0	3660.17	2820.27	30312.5
TBR1	Two-way ANOVA with Tukey post-hoc	Emx-DG-Ctrl	Emx-DG-cKO	(60,70]	2.5425e-11	***	0	32799.6	4556.38	86855.2
TBR1	Two-way ANOVA with Tukey post-hoc	Emx-DG-Ctrl	Emx-DG-cKO	(70,80]	0.999374	NS	0	1479.05	5647.08	23123.4
TBR1	Two-way ANOVA with Tukey post-hoc	Emx-DG-Ctrl	Emx-DG-cKO	(80,90]	0.845242	NS	0	3844.97	30840.1	2662.32
TBR1	Two-way ANOVA with Tukey post-hoc	Emx-DG-Ctrl	Emx-DG-cKO	(90,100]	1	NS	0	91.9392	10819.5	15176.8
TBR1	Two-way ANOVA with Tukey post-hoc	Emx-POMT2-Ctrl	Emx-POMT2-cKO	(0,10]	0.999771	NS	0	2714.55	46962	12657.2
TBR1	Two-way ANOVA with Tukey post-hoc	Emx-POMT2-Ctrl	Emx-POMT2-cKO	(10,20]	0.999991	NS	0	1780.12	14985.3	42765.1
TBR1	Two-way ANOVA with Tukey post-hoc	Emx-POMT2-Ctrl	Emx-POMT2-cKO	(20,30]	0.953037	NS	0	6257.02	7311.02	59393.2
TBR1	Two-way ANOVA with Tukey post-hoc	Emx-POMT2-Ctrl	Emx-POMT2-cKO	(30,40]	1	NS	0	152.242	23185.3	31309.3
TBR1	Two-way ANOVA with Tukey post-hoc	Emx-POMT2-Ctrl	Emx-POMT2-cKO	(40,50]	1	NS	0	620.013	19517.7	35912.5
TBR1	Two-way ANOVA with Tukey post-hoc	Emx-POMT2-Ctrl	Emx-POMT2-cKO	(50,60]	0.55629	NS	0	11074.5	3524.87	72814.2
TBR1	Two-way ANOVA with Tukey post-hoc	Emx-POMT2-Ctrl	Emx-POMT2-cKO	(60,70]	3.08922e-05	**	0	37235.5	804.241	127857
TBR1	Two-way ANOVA with Tukey post-hoc	Emx-POMT2-Ctrl	Emx-POMT2-cKO	(70,80]	0.772294	NS	0	8947.63	4901.95	67183.5
TBR1	Two-way ANOVA with Tukey post-hoc	Emx-POMT2-Ctrl	Emx-POMT2-cKO	(80,90]	1	NS	0	126.519	23518.6	30924.6
TBR1	Two-way ANOVA with Tukey post-hoc	Emx-POMT2-Ctrl	Emx-POMT2-cKO	(90,100]	1	NS	0	360.333	33704.7	21206.2
TBR1	Two-way ANOVA with Tukey post-hoc	B4GAT1-Ctrl	B4GAT1-Mutant	(0,10]	0.609945	NS	0	2332.48	15831.2	854.432
TBR1	Two-way ANOVA with Tukey post-hoc	B4GAT1-Ctrl	B4GAT1-Mutant	(10,20]	0.311273	NS	0	3019.96	17551.1	509.509
TBR1	Two-way ANOVA with Tukey post-hoc	B4GAT1-Ctrl	B4GAT1-Mutant	(20,30]	0.999991	NS	0	394.502	9484.53	3325.18
TBR1	Two-way ANOVA with Tukey post-hoc	B4GAT1-Ctrl	B4GAT1-Mutant	(30,40]	1	NS	0	83.7168	7512.76	4675.39
TBR1	Two-way ANOVA with Tukey post-hoc	B4GAT1-Ctrl	B4GAT1-Mutant	(40,50]	1	NS	0	0.115299	5957.82	6063.12
TBR1	Two-way ANOVA with Tukey post-hoc	B4GAT1-Ctrl	B4GAT1-Mutant	(50,60]	1	NS	0	30.7179	6900.43	5181.71
TBR1	Two-way ANOVA with Tukey post-hoc	B4GAT1-Ctrl	B4GAT1-Mutant	(60,70]	1	NS	0	268.209	8817.88	3739.25
TBR1	Two-way ANOVA with Tukey post-hoc	B4GAT1-Ctrl	B4GAT1-Mutant	(70,80]	0.999996	NS	0	360.664	9315.65	3426.39
TBR1	Two-way ANOVA with Tukey post-hoc	B4GAT1-Ctrl	B4GAT1-Mutant	(80,90]	1	NS	0	3.6024	5719.67	6308.25
TBR1	Two-way ANOVA with Tukey post-hoc	B4GAT1-Ctrl	B4GAT1-Mutant	(90,100]	0.999776	NS	0	595.638	10390.2	2821.82
TBR1	Two-way ANOVA with Tukey post-hoc	FKRP-Ctrl	FKRP-Mutant	(0,10]	0.999299	NS	0	3910.83	14774.9	60824.1
TBR1	Two-way ANOVA with Tukey post-hoc	FKRP-Ctrl	FKRP-Mutant	(10,20]	1	NS	0	479.271	26307.7	42428.1
TBR1	Two-way ANOVA with Tukey post-hoc	FKRP-Ctrl	FKRP-Mutant	(20,30]	1	NS	0	26.4952	35810.3	32020
TBR1	Two-way ANOVA with Tukey post-hoc	FKRP-Ctrl	FKRP-Mutant	(30,40]	1	NS	0	1451.27	49365.8	21314
TBR1	Two-way ANOVA with Tukey post-hoc	FKRP-Ctrl	FKRP-Mutant	(40,50]	0.999992	NS	0	2155.05	53135.4	18952
TBR1	Two-way ANOVA with Tukey post-hoc	FKRP-Ctrl	FKRP-Mutant	(50,60]	0.999888	NS	0	3043.17	57242.3	16621.3
TBR1	Two-way ANOVA with Tukey post-hoc	FKRP-Ctrl	FKRP-Mutant	(60,70]	1	NS	0	94.7188	37566.6	30400.1
TBR1	Two-way ANOVA with Tukey post-hoc	FKRP-Ctrl	FKRP-Mutant	(70,80]	1	NS	0	1226.83	22219.6	48011.3
TBR1	Two-way ANOVA with Tukey post-hoc	FKRP-Ctrl	FKRP-Mutant	(80,90]	1	NS	0	1038.54	23062.1	46792.2
TBR1	Two-way ANOVA with Tukey post-hoc	FKRP-Ctrl	FKRP-Mutant	(90,100]	1	NS	0	464.113	26421	42284.5
TBR1	Two-way ANOVA with Tukey post-hoc	ICD-Ctrl	ICD-Mutant	(0,10]	1	NS	0	194.232	18083.1	11363.5
TBR1	Two-way ANOVA with Tukey post-hoc	ICD-Ctrl	ICD-Mutant	(10,20]	0.99991	NS	0	1257.59	7237.58	24335.7
TBR1	Two-way ANOVA with Tukey post-hoc	ICD-Ctrl	ICD-Mutant	(20,30]	0.999999	NS	0	708.67	8820.16	21655.3
TBR1	Two-way ANOVA with Tukey post-hoc	ICD-Ctrl	ICD-Mutant	(30,40]	1	NS	0	397.569	10119.8	19733.4
TBR1	Two-way ANOVA with Tukey post-hoc	ICD-Ctrl	ICD-Mutant	(40,50]	1	NS	0	13.189	13666.8	15417.8
TBR1	Two-way ANOVA with Tukey post-hoc	ICD-Ctrl	ICD-Mutant	(50,60]	1	NS	0	118.704	17274.3	12021.2
TBR1	Two-way ANOVA with Tukey post-hoc	ICD-Ctrl	ICD-Mutant	(60,70]	1	NS	0	423.469	9991.64	19913.4
TBR1	Two-way ANOVA with Tukey post-hoc	ICD-Ctrl	ICD-Mutant	(70,80]	1	NS	0	4.68056	15055.3	14012.2
TBR1	Two-way ANOVA with Tukey post-hoc	ICD-Ctrl	ICD-Mutant	(80,90]	0.990211	NS	0	2488.71	29044.2	4991.37
TBR1	Two-way ANOVA with Tukey post-hoc	ICD-Ctrl	ICD-Mutant	(90,100]	1	NS	0	239.969	18503.5	11034.6

## Sheet: Fig3
Analysis	test	Experiment	term		p.value	significance	df	sumsq	meansq	f.statistic
CB1R	Two-way ANOVA	Emx-DG	Genotype		0	***	1	5.29978e+14	5.29978e+14	6.73355e+06
CB1R	Two-way ANOVA	Emx-DG	Region		0	***	4	3.50442e+15	8.76104e+14	1.11312e+07
CB1R	Two-way ANOVA	Emx-DG	Genotype:Region		0	***	4	1.7591e+15	4.39776e+14	5.5875e+06
CB1R	Two-way ANOVA	Emx-DG	Residuals		NA	NS	153338689	1.20688e+16	7.8707e+07	NA
CB1R	Two-way ANOVA	Emx-POMT2	Genotype		0	***	1	1.08225e+15	1.08225e+15	7.66073e+06
CB1R	Two-way ANOVA	Emx-POMT2	Region		0	***	4	6837688976443887	1.70942e+15	1.21002e+07
CB1R	Two-way ANOVA	Emx-POMT2	Genotype:Region		0	***	4	2063858298489568	5.15965e+14	3.65228e+06
CB1R	Two-way ANOVA	Emx-POMT2	Residuals		NA	NS	125305636	1.77022e+16	1.41272e+08	NA
CB1R	Two-way ANOVA	ICD	Genotype		1.33814e-137	***	1	9.34432e+12	9.34432e+12	98606.8
CB1R	Two-way ANOVA	ICD	Region		0	***	4	8584666079088417	2.14617e+15	2.26476e+07
CB1R	Two-way ANOVA	ICD	Genotype:Region		0	***	4	1.04253e+14	2.60633e+13	275036
CB1R	Two-way ANOVA	ICD	Residuals		NA	NS	92044836	8722484402086676	9.47634e+07	NA
CB1R	Two-way ANOVA	B4GAT1	Genotype		7.52255e-305	***	1	3.17024e+14	3.17024e+14	507557
CB1R	Two-way ANOVA	B4GAT1	Region		0	***	4	2.84467e+17	7.11168e+16	1.13858e+08
CB1R	Two-way ANOVA	B4GAT1	Genotype:Region		4.14583e-286	***	4	2.83984e+14	7.09961e+13	113665
CB1R	Two-way ANOVA	B4GAT1	Residuals		NA	NS	163686436	1.0224e+17	6.24608e+08	NA
CB1R	Two-way ANOVA	FKRP	Genotype		8.0052e-136	***	1	1.97708e+13	1.97708e+13	95541.3
CB1R	Two-way ANOVA	FKRP	Region		0	***	4	7.51226e+16	1.87806e+16	9.07566e+07
CB1R	Two-way ANOVA	FKRP	Genotype:Region		1.1704e-197	***	4	4.43146e+13	1.10786e+13	53537.1
CB1R	Two-way ANOVA	FKRP	Residuals		NA	NS	125305636	2.593e+16	2.06934e+08	NA
Analysis	test	Genotype1	Genotype2	Region	adj.p.value	significance	null.value	estimate	conf.low	conf.high
CB1R	Two-way ANOVA with Tukey post-hoc	Emx-DG-Ctrl	Emx-DG-cKO	SO	0.942235	NS	0	411.759	9304.96	3122.41
CB1R	Two-way ANOVA with Tukey post-hoc	Emx-DG-Ctrl	Emx-DG-cKO	SP	2.50278e-20	***	0	130340	81142.5	191140
CB1R	Two-way ANOVA with Tukey post-hoc	Emx-DG-Ctrl	Emx-DG-cKO	SR	0.999614	NS	0	48.8876	4785.65	6915.97
CB1R	Two-way ANOVA with Tukey post-hoc	Emx-POMT2-Ctrl	Emx-POMT2-cKO	SO	0.709176	NS	0	1740.22	20870.8	3725.32
CB1R	Two-way ANOVA with Tukey post-hoc	Emx-POMT2-Ctrl	Emx-POMT2-cKO	SP	0	***	0	147536	79159.5	237028
CB1R	Two-way ANOVA with Tukey post-hoc	Emx-POMT2-Ctrl	Emx-POMT2-cKO	SR	0.407068	NS	0	2943.68	2351.83	24651.2
CB1R	Two-way ANOVA with Tukey post-hoc	B4GAT1-Ctrl	B4GAT1-Mutant	SO	0.973771	NS	0	231.001	6950.7	2806.19
CB1R	Two-way ANOVA with Tukey post-hoc	B4GAT1-Ctrl	B4GAT1-Mutant	SP	1.89575e-19	***	0	66052.9	105742	35658.8
CB1R	Two-way ANOVA with Tukey post-hoc	B4GAT1-Ctrl	B4GAT1-Mutant	SR	0.99998	NS	0	11.8648	5128.95	4189.67
CB1R	Two-way ANOVA with Tukey post-hoc	FKRP-Ctrl	FKRP-Mutant	SO	0.998959	NS	0	31.239	3072.34	1958.09
CB1R	Two-way ANOVA with Tukey post-hoc	FKRP-Ctrl	FKRP-Mutant	SP	0	***	0	22809.7	40348	10239.3
CB1R	Two-way ANOVA with Tukey post-hoc	FKRP-Ctrl	FKRP-Mutant	SR	0.997531	NS	0	44.6173	3194.41	1862.77
CB1R	Two-way ANOVA with Tukey post-hoc	ICD-Ctrl	ICD-Mutant	SO	0.992064	NS	0	185.71	4413.42	8777.57
CB1R	Two-way ANOVA with Tukey post-hoc	ICD-Ctrl	ICD-Mutant	SP	1.90579e-16	***	0	37884.8	75460.8	13128.3
CB1R	Two-way ANOVA with Tukey post-hoc	ICD-Ctrl	ICD-Mutant	SR	0.998415	NS	0	94.6647	8062.37	4946.53

## Sheet: Fig3S2
Analysis	test	alternative	p.value	significance	estimate	estimate1	estimate2	statistic	parameter	conf.low	conf.high
NECAB1	Welch Two Sample t-test	two.sided	0.242901	NS	0.127978	0.941128	0.81315	1.20615	18.574	-0.0944475	0.350403
NECAB2	Welch Two Sample t-test	two.sided	0.825534	NS	0.00935342	0.36862	0.359267	0.223078	21.9901	-0.0776042	0.096311
PV	Welch Two Sample t-test	two.sided	0.443016	NS	0.097165	2.14137	2.0442	0.781234	21.9338	-0.160815	0.355145

## Sheet: Fig3S3
Analysis	test	Experiment	term		p.value	significance	df	sumsq	meansq	f.statistic
PV	Two-way ANOVA	Emx-DG	Genotype		6.08331e-53	***	1	2.80464e+10	2.80464e+10	13327.9
PV	Two-way ANOVA	Emx-DG	Region		0	***	4	4.26948e+14	1.06737e+14	5.07225e+07
PV	Two-way ANOVA	Emx-DG	Genotype:Region		2.29116e-170	***	4	3.29233e+11	8.23082e+10	39113.7
PV	Two-way ANOVA	Emx-DG	Residuals		NA	NS	243172836	5.11716e+14	2.10433e+06	NA
PV	Two-way ANOVA	Emx-POMT2	Genotype		0.000211064	*	1	1.08312e+09	1.08312e+09	35.694
PV	Two-way ANOVA	Emx-POMT2	Region		0	***	4	3.65034e+15	9.12586e+14	3.0074e+07
PV	Two-way ANOVA	Emx-POMT2	Genotype:Region		3.1885e-07	***	4	6.79781e+09	1.69945e+09	56.005
PV	Two-way ANOVA	Emx-POMT2	Residuals		NA	NS	163686436	4967008426581158	3.03447e+07	NA
PV	Two-way ANOVA	ICD	Genotype		5.80971e-24	***	1	3.67538e+09	3.67538e+09	2425.21
PV	Two-way ANOVA	ICD	Region		0	***	4	2.31367e+14	5.78417e+13	3.8167e+07
PV	Two-way ANOVA	ICD	Genotype:Region		1.00919e-28	***	4	6.34012e+09	1.58503e+09	1045.88
PV	Two-way ANOVA	ICD	Residuals		NA	NS	92044836	1.39493e+14	1.51549e+06	NA
PV	Two-way ANOVA	B4GAT1	Genotype		0.0690088	NS	1	5.81065e+07	5.81065e+07	1.57404
PV	Two-way ANOVA	B4GAT1	Region		0	***	4	8796704687040608	2199176171760152	5.95732e+07
PV	Two-way ANOVA	B4GAT1	Genotype:Region		0.0256722	NS	4	4.95282e+08	1.2382e+08	3.35416
PV	Two-way ANOVA	B4GAT1	Residuals		NA	NS	163686436	6042566578489369	3.69155e+07	NA
PV	Two-way ANOVA	FKRP	Genotype		0.0669654	NS	1	1.97322e+06	1.97322e+06	1.62672
PV	Two-way ANOVA	FKRP	Region		0	***	4	1.05916e+14	2.6479e+13	2.18293e+07
PV	Two-way ANOVA	FKRP	Genotype:Region		0.00805134	NS	4	2.82165e+07	7.05413e+06	5.81542
PV	Two-way ANOVA	FKRP	Residuals		NA	NS	108035236	1.31047e+14	1.213e+06	NA
Analysis	test	Genotype1	Genotype2	Region	adj.p.value	significance	null.value	estimate	conf.low	conf.high
PV	Two-way ANOVA with Tukey post-hoc	Emx-DG-Ctrl	Emx-DG-cKO	SO	0.827122	NS	0	78.8543	265.845	1160.41
PV	Two-way ANOVA with Tukey post-hoc	Emx-DG-Ctrl	Emx-DG-cKO	SP	1.46524e-07	***	0	1446.12	3995.84	164.947
PV	Two-way ANOVA with Tukey post-hoc	Emx-DG-Ctrl	Emx-DG-cKO	SR	0.993873	NS	0	16.9992	858.944	443.596
PV	Two-way ANOVA with Tukey post-hoc	Emx-POMT2-Ctrl	Emx-POMT2-cKO	SO	0.985898	NS	0	122.322	2096.04	4610.73
PV	Two-way ANOVA with Tukey post-hoc	Emx-POMT2-Ctrl	Emx-POMT2-cKO	SP	0.954474	NS	0	206.092	1805.1	5069.2
PV	Two-way ANOVA with Tukey post-hoc	Emx-POMT2-Ctrl	Emx-POMT2-cKO	SR	0.999877	NS	0	17.2175	3720	2776.56
PV	Two-way ANOVA with Tukey post-hoc	B4GAT1-Ctrl	B4GAT1-Mutant	SO	0.999949	NS	0	4.5405	1372.84	1075.2
PV	Two-way ANOVA with Tukey post-hoc	B4GAT1-Ctrl	B4GAT1-Mutant	SP	0.90443	NS	0	110.663	595.43	2064.86
PV	Two-way ANOVA with Tukey post-hoc	B4GAT1-Ctrl	B4GAT1-Mutant	SR	1	NS	0	0.573987	1167.14	1272.97
PV	Two-way ANOVA with Tukey post-hoc	FKRP-Ctrl	FKRP-Mutant	SO	1	NS	0	0.111821	543.304	574.929
PV	Two-way ANOVA with Tukey post-hoc	FKRP-Ctrl	FKRP-Mutant	SP	0.997381	NS	0	10.2325	720.499	417.975
PV	Two-way ANOVA with Tukey post-hoc	FKRP-Ctrl	FKRP-Mutant	SR	1	NS	0	0.00110432	560.577	557.434
PV	Two-way ANOVA with Tukey post-hoc	ICD-Ctrl	ICD-Mutant	SO	0.754372	NS	0	74.2571	191.307	965.09
PV	Two-way ANOVA with Tukey post-hoc	ICD-Ctrl	ICD-Mutant	SP	0.345929	NS	0	153.633	101.078	1214.07
PV	Two-way ANOVA with Tukey post-hoc	ICD-Ctrl	ICD-Mutant	SR	0.999893	NS	0	2.48597	577.217	435.638

## Sheet: Fig4
Analysis	test	Age	term			p.value	significance	df	sumsq	meansq	f.statistic
CB1R	Two-way ANOVA	P5	Genotype			0	***	1	1.48223e+13	1.48223e+13	5.83842e+06
CB1R	Two-way ANOVA	P5	Region			0	***	4	1.59374e+13	3.98436e+12	1.56942e+06
CB1R	Two-way ANOVA	P5	Genotype:Region			0	***	4	2.35809e+13	5.89522e+12	2.32209e+06
CB1R	Two-way ANOVA	P5	Residuals			NA	NS	1251390625	3176971045300246	2.53875e+06	NA
CB1R	Two-way ANOVA	P10	Genotype			0	***	1	1.16755e+13	1.16755e+13	2.47412e+06
CB1R	Two-way ANOVA	P10	Region			0	***	4	4.31249e+12	1.07812e+12	228461
CB1R	Two-way ANOVA	P10	Genotype:Region			0	***	4	6.62094e+14	1.65524e+14	3.50755e+07
CB1R	Two-way ANOVA	P10	Residuals			NA	NS	1349680644	6369222591304543	4.71906e+06	NA
CB1R	Two-way ANOVA	P15	Genotype			0	***	1	2.17398e+15	2.17398e+15	1.94426e+08
CB1R	Two-way ANOVA	P15	Region			0	***	4	2.71151e+15	6.77877e+14	6.06247e+07
CB1R	Two-way ANOVA	P15	Genotype:Region			0	***	4	3675144465205399	9.18786e+14	8.217e+07
CB1R	Two-way ANOVA	P15	Residuals			NA	NS	1973314084	2.20647e+16	1.11815e+07	NA
CB1R	Two-way ANOVA	P30	Genotype			0	***	1	2.51451e+14	2.51451e+14	6.3745e+06
CB1R	Two-way ANOVA	P30	Region			0	***	4	2.10586e+16	5264645114759171	1.33463e+08
CB1R	Two-way ANOVA	P30	Genotype:Region			0	***	4	4751609214254452	1.1879e+15	3.01143e+07
CB1R	Two-way ANOVA	P30	Residuals			NA	NS	1677066304	6.61543e+16	3.94464e+07	NA
Analysis	test	Age	Region	Genotype1	Genotype2	adj.p.value	significance	null.value	estimate	conf.low	conf.high
CB1R	Two-way ANOVA with Tukey post-hoc	P5	SO	Emx-DG-Ctrl	Emx-DG-cKO	1.45568e-08	***	0	1043.61	2772.26	142.985
CB1R	Two-way ANOVA with Tukey post-hoc	P5	SP	Emx-DG-Ctrl	Emx-DG-cKO	4.15158e-07	***	0	866.872	82.7256	2479.05
CB1R	Two-way ANOVA with Tukey post-hoc	P5	SR	Emx-DG-Ctrl	Emx-DG-cKO	1.82227e-25	***	0	3327.29	1393.93	6088.68
CB1R	Two-way ANOVA with Tukey post-hoc	P10	SO	Emx-DG-Ctrl	Emx-DG-cKO	3.54939e-23	***	0	3185.54	5996.12	1256.46
CB1R	Two-way ANOVA with Tukey post-hoc	P10	SP	Emx-DG-Ctrl	Emx-DG-cKO	0	***	0	9958.53	6209.19	14589.4
CB1R	Two-way ANOVA with Tukey post-hoc	P10	SR	Emx-DG-Ctrl	Emx-DG-cKO	0.0847025	NS	0	235.14	32.0325	1319.75
CB1R	Two-way ANOVA with Tukey post-hoc	P15	SO	Emx-DG-Ctrl	Emx-DG-cKO	3.53604e-11	***	0	1716.76	4135.48	344.476
CB1R	Two-way ANOVA with Tukey post-hoc	P15	SP	Emx-DG-Ctrl	Emx-DG-cKO	4.1179e-27	***	0	34204.4	26266.9	43188.4
CB1R	Two-way ANOVA with Tukey post-hoc	P15	SR	Emx-DG-Ctrl	Emx-DG-cKO	5.39755e-18	***	0	2821.1	914.471	5774.15
CB1R	Two-way ANOVA with Tukey post-hoc	P30	SO	Emx-DG-Ctrl	Emx-DG-cKO	3.45407e-26	***	0	6318.66	11516.9	2669.1
CB1R	Two-way ANOVA with Tukey post-hoc	P30	SP	Emx-DG-Ctrl	Emx-DG-cKO	0	***	0	34636.5	25053.3	45768.4
CB1R	Two-way ANOVA with Tukey post-hoc	P30	SR	Emx-DG-Ctrl	Emx-DG-cKO	0.997821	NS	0	13.824	581.224	995.069

## Sheet: Fig5, Fig5S1 - Density
Analysis	test	alternative	Experiment	Region	p.value	significance	t.statistic	estimate	estimate1	estimate2	conf.low	conf.high
CB1R Density	Welch Two Sample t-test	two.sided	B4GAT1	All	3.10503e-10	***	29.8782	22.4651	1456.78	1117.44	8.64746	42.7561
CB1R Density	Welch Two Sample t-test	two.sided	B4GAT1	SO	3.62995e-11	***	38.8569	26.8346	932.528	642.983	11.8226	47.9144
CB1R Density	Welch Two Sample t-test	two.sided	B4GAT1	SP	1.6489e-08	***	21.5054	27.8384	1788.93	1370.45	8.50359	58.3135
CB1R Density	Welch Two Sample t-test	two.sided	B4GAT1	SR	3.38451e-11	***	35.7298	25.5065	1416.84	1062.14	10.8572	46.3184
CB1R Density	Welch Two Sample t-test	two.sided	Emx-DG	All	3.9386e-16	***	64.6038	32.9138	1151.97	795.446	18.2146	51.93
CB1R Density	Welch Two Sample t-test	two.sided	Emx-DG	SO	0.0579433	NS	1.43607	1.14396	783.731	724.99	0.574249	8.39208
CB1R Density	Welch Two Sample t-test	two.sided	Emx-DG	SP	1.57417e-29	***	279.15	102.127	1389.83	738.458	78.5072	128.848
CB1R Density	Welch Two Sample t-test	two.sided	Emx-DG	SR	1.45075e-10	***	28.9294	22.3888	1103.16	811.238	8.55101	42.7604
CB1R Density	Welch Two Sample t-test	two.sided	Emx-POMT2	All	5.37689e-07	***	16.1399	20.0639	1218.65	925.98	4.60541	46.4105
CB1R Density	Welch Two Sample t-test	two.sided	Emx-POMT2	SO	0.193087	NS	0.622913	0.806992	866.164	919.848	10.7309	2.18787
CB1R Density	Welch Two Sample t-test	two.sided	Emx-POMT2	SP	1.30462e-10	***	40.5471	62.2648	1383.13	858.471	27.6088	110.822
CB1R Density	Welch Two Sample t-test	two.sided	Emx-POMT2	SR	3.84506e-08	***	19.7656	25.386	1222.88	895.88	7.23832	54.5602
CB1R Density	Welch Two Sample t-test	two.sided	FKRP	All	0.0199735	NS	2.32792	3.78591	1172.6	1043.13	0.488709	21.0732
CB1R Density	Welch Two Sample t-test	two.sided	FKRP	SO	0.000689453	*	5.73909	9.63012	847.623	676.558	0.163999	33.6576
CB1R Density	Welch Two Sample t-test	two.sided	FKRP	SP	0.00210259	*	4.48554	6.53653	1387.91	1203.95	0.00265066	25.6223
CB1R Density	Welch Two Sample t-test	two.sided	FKRP	SR	0.28997	NS	0.390706	0.951391	1132.38	1067.68	5.12867	17.7699
CB1R Density	Welch Two Sample t-test	two.sided	ICD	All	0.0186968	NS	2.4761	1.92774	1258.24	1358.67	10.7025	0.244636
CB1R Density	Welch Two Sample t-test	two.sided	ICD	SO	4.21847e-08	***	22.578	23.8849	926.369	1247.75	49.9007	7.34618
CB1R Density	Welch Two Sample t-test	two.sided	ICD	SP	0.827403	NS	0.0132779	0.00578899	1393.78	1399.47	2.1594	1.73533
CB1R Density	Welch Two Sample t-test	two.sided	ICD	SR	0.119039	NS	0.951127	1.11011	1288.05	1364.78	11.2757	1.56422
VGAT Density	Welch Two Sample t-test	two.sided	B4GAT1	All	0.0046122	NS	3.50459	5.74062	1966.96	1760.18	0.0338759	24.7603
VGAT Density	Welch Two Sample t-test	two.sided	B4GAT1	SO	0.0601841	NS	1.38455	3.03267	1491.25	1359.79	1.5298	22.2762
VGAT Density	Welch Two Sample t-test	two.sided	B4GAT1	SP	0.00403751	NS	3.63799	8.48336	2580	2292.6	0.0295514	35.9658
VGAT Density	Welch Two Sample t-test	two.sided	B4GAT1	SR	0.000751948	*	5.19858	7.86584	1675.54	1453.8	0.106767	27.9045
VGAT Density	Welch Two Sample t-test	two.sided	Emx-DG	All	0.784002	NS	0.0209068	0.0101576	1797.72	1789.18	1.66109	2.22129
VGAT Density	Welch Two Sample t-test	two.sided	Emx-DG	SO	0.0550626	NS	1.43648	0.883494	1480.63	1553.85	6.26705	0.388778
VGAT Density	Welch Two Sample t-test	two.sided	Emx-DG	SP	0.0464498	NS	1.55987	0.956115	2215.7	2124.6	0.338159	6.43706
VGAT Density	Welch Two Sample t-test	two.sided	Emx-DG	SR	0.895027	NS	0.00461009	0.00203991	1640.11	1636.45	1.64167	1.8813
VGAT Density	Welch Two Sample t-test	two.sided	Emx-POMT2	All	0.117486	NS	0.917362	2.07619	2404.94	2265.69	2.4981	19.9124
VGAT Density	Welch Two Sample t-test	two.sided	Emx-POMT2	SO	0.467631	NS	0.167586	0.383211	1963.84	1909.35	5.81063	13.3123
VGAT Density	Welch Two Sample t-test	two.sided	Emx-POMT2	SP	0.0885914	NS	1.10873	3.46236	2972.55	2773.11	2.86483	29.3121
VGAT Density	Welch Two Sample t-test	two.sided	Emx-POMT2	SR	0.332206	NS	0.315924	0.363239	2041.02	1986.92	2.39211	7.57368
VGAT Density	Welch Two Sample t-test	two.sided	FKRP	All	0.100381	NS	1.02422	1.02297	1606.05	1688.14	9.13999	1.00081
VGAT Density	Welch Two Sample t-test	two.sided	FKRP	SO	0.119879	NS	0.905976	1.09822	1404.5	1484.14	10.6607	1.36691
VGAT Density	Welch Two Sample t-test	two.sided	FKRP	SP	0.202779	NS	0.57932	0.434118	1883.84	1941.47	5.75751	1.17014
VGAT Density	Welch Two Sample t-test	two.sided	FKRP	SR	0.0921817	NS	1.082	1.49718	1488.77	1584.69	12.8919	1.30724
VGAT Density	Welch Two Sample t-test	two.sided	ICD	All	0.295462	NS	0.374522	0.423963	1802.85	1858.57	7.79965	2.2217
VGAT Density	Welch Two Sample t-test	two.sided	ICD	SO	0.0345436	NS	1.80367	2.26551	1583.81	1705.88	14.1459	0.563665
VGAT Density	Welch Two Sample t-test	two.sided	ICD	SP	0.987293	NS	6.45173e-05	5.41038e-05	2029.26	2028.6	3.37107	3.42531
VGAT Density	Welch Two Sample t-test	two.sided	ICD	SR	0.247196	NS	0.468335	0.808489	1702.5	1777.51	12.5592	3.04703

## Sheet: Fig5, Fig5S1 - Coloc
Analysis	test	alternative	Experiment	Region	p.value	significance	t.statistic	estimate	estimate1	estimate2	conf.low	conf.high
CB1R/VGAT Coloc	Welch Two Sample t-test	two.sided	B4GAT1	all	0.0228586	*	2.45812	5.09193	62.6818	57.5899	0.780769	9.40308
CB1R/VGAT Coloc	Welch Two Sample t-test	two.sided	B4GAT1	so	0.0470762	*	2.11196	6.40638	52.1581	45.7517	0.0909204	12.7218
CB1R/VGAT Coloc	Welch Two Sample t-test	two.sided	B4GAT1	sp	0.00361577	**	3.32002	5.79855	73.3109	67.5123	2.1419	9.4552
CB1R/VGAT Coloc	Welch Two Sample t-test	two.sided	B4GAT1	sr	0.0174638	*	2.57059	5.93867	54.9789	49.0403	1.14683	10.7305
CB1R/VGAT Coloc	Welch Two Sample t-test	two.sided	Emx-DG	all	0.102929	NS	1.68405	4.67471	57.9279	53.2532	-1.00308	10.3525
CB1R/VGAT Coloc	Welch Two Sample t-test	two.sided	Emx-DG	so	0.988139	NS	-0.0149955	-0.0443268	49.5281	49.5724	-6.09218	6.00352
CB1R/VGAT Coloc	Welch Two Sample t-test	two.sided	Emx-DG	sp	0.0131297	*	2.64956	7.43675	65.4641	58.0274	1.68597	13.1875
CB1R/VGAT Coloc	Welch Two Sample t-test	two.sided	Emx-DG	sr	0.749021	NS	0.322988	0.868795	53.2999	52.4311	-4.6326	6.37019
CB1R/VGAT Coloc	Welch Two Sample t-test	two.sided	Emx-POMT2	all	1.31945e-07	***	7.29366	12.2738	68.4945	56.2207	8.8056	15.742
CB1R/VGAT Coloc	Welch Two Sample t-test	two.sided	Emx-POMT2	so	1.0985e-06	***	6.41863	12.626	63.5982	50.9722	8.57117	16.6808
CB1R/VGAT Coloc	Welch Two Sample t-test	two.sided	Emx-POMT2	sp	6.4459e-07	***	6.54415	10.3586	76.1271	65.7685	7.10339	13.6139
CB1R/VGAT Coloc	Welch Two Sample t-test	two.sided	Emx-POMT2	sr	0.00019344	***	4.37935	9.02889	61.3453	52.3164	4.77838	13.2794
CB1R/VGAT Coloc	Welch Two Sample t-test	two.sided	FKRP	all	0.00183192	**	3.54398	4.56081	62.8537	58.2929	1.89111	7.23051
CB1R/VGAT Coloc	Welch Two Sample t-test	two.sided	FKRP	so	0.000122624	***	4.75579	7.08495	58.3044	51.2194	3.97616	10.1937
CB1R/VGAT Coloc	Welch Two Sample t-test	two.sided	FKRP	sp	0.000123787	***	4.73252	3.79771	67.8475	64.0498	2.12503	5.47038
CB1R/VGAT Coloc	Welch Two Sample t-test	two.sided	FKRP	sr	0.0214395	*	2.48173	5.03569	59.9024	54.8667	0.820784	9.25061
CB1R/VGAT Coloc	Welch Two Sample t-test	two.sided	ICD	all	0.0893009	NS	-1.78552	-2.8386	60.9354	63.774	-6.15413	0.476938
CB1R/VGAT Coloc	Welch Two Sample t-test	two.sided	ICD	so	0.0258768	*	-2.40133	-4.62585	56.0044	60.6302	-8.63687	-0.614823
CB1R/VGAT Coloc	Welch Two Sample t-test	two.sided	ICD	sp	0.79825	NS	0.259225	0.285547	65.6422	65.3567	-2.02001	2.59111
CB1R/VGAT Coloc	Welch Two Sample t-test	two.sided	ICD	sr	0.0104258	*	-2.86506	-6.38056	58.0687	64.4493	-11.0655	-1.69567

## Sheet: Fig5S2, Fig5S3 - Density
Analysis	test	alternative	Experiment	Region	p.value	significance	t.statistic	estimate	estimate1	estimate2	conf.low	conf.high
PV Density	Welch Two Sample t-test	two.sided	B4GAT1	All	0.502501	NS	0.678771	0.554177	40.0226	39.4685	-1.11343	2.22178
PV Density	Welch Two Sample t-test	two.sided	B4GAT1	SO	0.389668	NS	0.872962	0.845544	36.9041	36.0585	-1.13319	2.82428
PV Density	Welch Two Sample t-test	two.sided	B4GAT1	SP	0.540389	NS	0.619772	0.473508	44.5592	44.0857	-1.09105	2.03807
PV Density	Welch Two Sample t-test	two.sided	B4GAT1	SR	0.373505	NS	0.903433	0.920257	36.9251	36.0049	-1.16018	3.0007
PV Density	Welch Two Sample t-test	two.sided	Emx-DG	All	0.369091	NS	0.906365	0.918088	42.9878	42.0697	-1.11646	2.95263
PV Density	Welch Two Sample t-test	two.sided	Emx-DG	SO	0.235925	NS	1.19967	1.22399	40.0208	38.7968	-0.825319	3.27331
PV Density	Welch Two Sample t-test	two.sided	Emx-DG	SP	0.529293	NS	0.633742	0.709816	47.1611	46.4512	-1.54285	2.96248
PV Density	Welch Two Sample t-test	two.sided	Emx-DG	SR	0.391066	NS	0.86561	0.904618	40.4252	39.5205	-1.19733	3.00656
PV Density	Welch Two Sample t-test	two.sided	Emx-POMT2	All	0.0696743	NS	1.90479	3.24517	48.1389	44.8938	-0.283596	6.77395
PV Density	Welch Two Sample t-test	two.sided	Emx-POMT2	SO	0.00212432	**	3.3992	4.01479	44.2813	40.2665	1.59081	6.43878
PV Density	Welch Two Sample t-test	two.sided	Emx-POMT2	SP	0.311456	NS	1.0362	2.70494	53.3751	50.6702	-2.71139	8.12128
PV Density	Welch Two Sample t-test	two.sided	Emx-POMT2	SR	0.0256047	*	2.38935	2.46594	43.8725	41.4066	0.329178	4.6027
PV Density	Welch Two Sample t-test	two.sided	FKRP	All	0.196972	NS	-1.32639	-1.67414	38.6418	40.3159	-4.27667	0.928379
PV Density	Welch Two Sample t-test	two.sided	FKRP	SO	0.392636	NS	-0.870284	-1.12048	36.161	37.2815	-3.77557	1.53461
PV Density	Welch Two Sample t-test	two.sided	FKRP	SP	0.149075	NS	-1.49007	-2.0881	42.2716	44.3597	-4.97847	0.802279
PV Density	Welch Two Sample t-test	two.sided	FKRP	SR	0.151219	NS	-1.48066	-1.71834	36.3413	38.0597	-4.10875	0.672074
PV Density	Welch Two Sample t-test	two.sided	ICD	All	0.523944	NS	-0.647766	-0.824637	39.9277	40.7524	-3.46718	1.81791
PV Density	Welch Two Sample t-test	two.sided	ICD	SO	0.752769	NS	-0.31896	-0.379699	37.0131	37.3928	-2.84867	2.08927
PV Density	Welch Two Sample t-test	two.sided	ICD	SP	0.341976	NS	-0.971335	-1.24156	42.8135	44.0551	-3.89292	1.4098
PV Density	Welch Two Sample t-test	two.sided	ICD	SR	0.679587	NS	-0.418924	-0.625545	38.2138	38.8394	-3.73362	2.48253

[truncated: 9 more sheets: Fig5S2, Fig5S3 - Coloc, Fig6B, Fig6C, Fig6S1A, Fig6S1B, Fig7, Fig7S1A, Fig7S1B, Fig7S1C]
